# Supplementary material for: Injured epithelial cell states impact kidney allograft survival after T-cell-mediated rejection
Source: Springer Nature journal article supplement (doi:10.1038/s41467-026-68397-1), 2026-01-28
Supplement: MOESM2 [file 41467_2026_68397_MOESM2_ESM.pdf › 41467_2026_68397_MOESM2_ESM.pdf]

### **Description of Additional Supplementary Files**

Supplemental Data 1: Additional custom genes for Xenium spatial transcriptomics.

Supplemental Data 2: Results from differential gene expression TCMR vs. Control.

Supplemental Data 3: Marker genes for PT and TAL Injury cell states used in bulk transcriptomics analyses.
