# Supplementary material for: Injured epithelial cell states impact kidney allograft survival after T-cell-mediated rejection
Source: Nat Commun. 2026 Jan 28;17:1060. doi: 10.1038/s41467-026-68397-1 (PMC12852170; doi:10.1038/s41467-026-68397-1)
Supplement: Supplementary file 3 — Supplemental Data 1 [file 41467_2026_68397_MOESM3_ESM.xlsx]

## Sheet: Sheet1
Supplemental Table S1: Additional custom genes for Xenium spatial transcriptomics
Gene	Ensembl ID	Probesets
Acta2	ENSMUSG00000035783	8
Aldob	ENSMUSG00000028307	8
Aqp2	ENSMUSG00000023013	4
Atp6v0a4	ENSMUSG00000038600	8
B2m	ENSMUSG00000060802	7
Ccl2	ENSMUSG00000035385	8
Cd14	ENSMUSG00000051439	8
Cd209a	ENSMUSG00000031494	8
Cd3e	ENSMUSG00000032093	8
Cd4	ENSMUSG00000023274	8
Cd40lg	ENSMUSG00000031132	8
Cd44	ENSMUSG00000005087	8
Cd74	ENSMUSG00000024610	8
Cd79a	ENSMUSG00000003379	8
Cdh5	ENSMUSG00000031871	8
Chac1	ENSMUSG00000027313	8
Clcn5	ENSMUSG00000004317	8
Cldn10	ENSMUSG00000022132	8
Cldn16	ENSMUSG00000038148	8
Clic5	ENSMUSG00000023959	8
Col1a2	ENSMUSG00000029661	8
Csf1r	ENSMUSG00000024621	8
Cxcl10	ENSMUSG00000034855	8
Dmxl2	ENSMUSG00000041268	8
Dnajb4	ENSMUSG00000028035	8
Egf	ENSMUSG00000028017	6
Ehd3	ENSMUSG00000024065	8
Foxi1	ENSMUSG00000047861	8
Foxp3	ENSMUSG00000039521	8
Fscn1	ENSMUSG00000029581	7
Fth1	ENSMUSG00000024661	8
Gzmb	ENSMUSG00000015437	8
Havcr1	ENSMUSG00000040405	8
Hspa1a	ENSMUSG00000091971	8
Ifng	ENSMUSG00000055170	8
Atad2	ENSMUSG00000022360	8
Il2ra	ENSMUSG00000026770	8
Il6	ENSMUSG00000025746	8
Itgae	ENSMUSG00000005947	8
Itgax	ENSMUSG00000030789	8
Klrc1	ENSMUSG00000030167	8
Klrk1	ENSMUSG00000030149	8
Krt20	ENSMUSG00000035775	8
Lag3	ENSMUSG00000030124	8
Lcn2	ENSMUSG00000026822	7
Lgals3	ENSMUSG00000050335	7
Ly6g	ENSMUSG00000022582	8
Adgre1	ENSMUSG00000004730	8
Met	ENSMUSG00000009376	8
Mki67	ENSMUSG00000031004	8
Mrc1	ENSMUSG00000026712	8
Myc	ENSMUSG00000022346	8
Myo5b	ENSMUSG00000025885	8
Ncr1	ENSMUSG00000062524	8
Nqo1	ENSMUSG00000003849	8
Pecam1	ENSMUSG00000020717	8
Pkd1	ENSMUSG00000032855	8
Plat	ENSMUSG00000031538	8
Pola1	ENSMUSG00000006678	8
Prom1	ENSMUSG00000029086	8
Ptprc	ENSMUSG00000026395	8
Scnn1g	ENSMUSG00000000216	8
Serpina1a	ENSMUSG00000066366	8
Slc12a1	ENSMUSG00000027202	3
Slc12a3	ENSMUSG00000031766	4
Slc26a4	ENSMUSG00000020651	8
Slc26a7	ENSMUSG00000040569	8
Slc2a1	ENSMUSG00000028645	8
Slc3a1	ENSMUSG00000024131	8
Slc4a9	ENSMUSG00000024485	8
Slc5a2	ENSMUSG00000030781	8
Slc7a11	ENSMUSG00000027737	8
Slc7a12	ENSMUSG00000039710	8
Slc7a13	ENSMUSG00000041052	8
Psd3	ENSMUSG00000030465	8
Snap23	ENSMUSG00000027287	8
Fmnl2	ENSMUSG00000036053	8
Stat1	ENSMUSG00000026104	8
Stc2	ENSMUSG00000020303	8
Tcf7	ENSMUSG00000000782	8
Tenm3	ENSMUSG00000031561	8
Top2a	ENSMUSG00000020914	8
Trib3	ENSMUSG00000032715	8
Umod	ENSMUSG00000030963	8
Vamp2	ENSMUSG00000020894	8
Vcam1	ENSMUSG00000027962	8
Vim	ENSMUSG00000026728	8
Wdr7	ENSMUSG00000040560	8
Wdr72	ENSMUSG00000044976	8
Wt1	ENSMUSG00000016458	8
Xbp1	ENSMUSG00000020484	8
Ms4a1	ENSMUSG00000024673	8
Ppp2r2b	ENSMUSG00000024500	8
Cd19	ENSMUSG00000030724	8
Cd80	ENSMUSG00000075122	8
Bcat1	ENSMUSG00000030268	8
Gls	ENSMUSG00000026103	8
Actn1	ENSMUSG00000015143	8
Slc6a15	ENSMUSG00000019894	8
Cep128	ENSMUSG00000061533	8
