# Supplementary material for: Injured epithelial cell states impact kidney allograft survival after T-cell-mediated rejection
Source: Nat Commun. 2026 Jan 28;17:1060. doi: 10.1038/s41467-026-68397-1 (PMC12852170; doi:10.1038/s41467-026-68397-1)
Supplement: Supplementary file 4 — Supplemental Data 2 [file 41467_2026_68397_MOESM4_ESM.xlsx]

## Sheet: Podo.bl6.to.bc
Table S2: Results from differential gene expression TCMR vs. Control
Differential expression was assessed using two-sided Wilcoxon rank-sum tests with Benjamini–Hochberg correction for multiple testing.
Podocytes			*This Fold Change was calculated between [C57BL/6 to BALB/c ] and [C57BL/6 to C57BL/6]
Gene upr.	p_val	avg_log2FC*	pct.1	pct.2	p_val_adj				Gene downr.	p_val	avg_log2FC*	pct.1	pct.2	p_val_adj
H2-K1	1.86642e-16	4.65976	1	0.519	4.42695e-12				Dbp	6.37801e-16	-2.91996	0.208	0.963	1.5128e-11
B2m	2.20917e-16	5.00883	1	0.444	5.23993e-12				Gm26870	1.5744e-15	-5.89707	0.021	0.519	3.73432e-11
Gbp2	2.70579e-16	7.37693	0.993	0.074	6.41786e-12				Slc34a1	7.81218e-15	-4.20736	0.139	0.778	1.85297e-10
H2-D1	3.69588e-16	4.00465	1	0.852	8.76626e-12				Kap	3.4826e-14	-2.42599	0.854	1	8.26037e-10
Iigp1	4.37161e-16	7.73133	0.986	0.037	1.0369e-11				Lrp2	7.02671e-14	-2.99882	0.104	0.741	1.66667e-09
Gbp7	5.30912e-16	5.50067	0.986	0.185	1.25927e-11				Gm42418	1.42409e-13	-1.98619	1	1	3.37781e-09
Gbp8	2.41035e-15	8.24234	0.958	0	5.71712e-11				Ass1	1.0191e-12	-3.10114	0.118	0.741	2.41719e-08
Stat1	3.5919e-15	4.74346	0.972	0.333	8.51964e-11				Cmss1	1.09915e-11	-1.97491	0.944	1	2.60707e-07
H2-T23	9.20864e-14	3.43812	0.951	0.481	2.1842e-09				mt-Cytb	3.11717e-11	-2.265	0.5	0.963	7.39361e-07
Irgm1	1.54292e-13	4.78478	0.917	0.148	3.65966e-09				Smarca2	3.90793e-11	-1.85087	0.403	0.963	9.26922e-07
Cd74	3.1689e-13	5.29546	0.91	0.111	7.51632e-09				Rdh16f2	4.23464e-11	-4.55692	0.014	0.37	1.00441e-06
Irgm2	6.46628e-13	4.61155	0.889	0.111	1.53374e-08				Slc22a8	2.15614e-10	-4.06888	0.028	0.407	5.11415e-06
Cd274	1.86876e-12	6.28026	0.854	0.037	4.43252e-08				Slc5a2	3.44e-10	-4.6757	0.021	0.37	8.15934e-06
Serping1	3.89027e-12	4.60432	0.861	0.148	9.22734e-08				Mep1a	1.02253e-09	-2.9776	0.069	0.519	2.42533e-05
H2-Q4	5.21734e-12	4.0421	0.875	0.148	1.2375e-07				mt-Nd2	1.61371e-09	-1.90479	0.625	1	3.82756e-05
Spp1	1.51528e-11	2.68229	0.993	0.704	3.59409e-07				Tmem27	2.64073e-09	-2.37541	0.229	0.778	6.26354e-05
Gbp3	1.53348e-11	6.83169	0.806	0	3.63727e-07				Ttc36	2.87706e-09	-2.12891	0.201	0.778	6.82409e-05
Irf1	2.58568e-11	3.97358	0.861	0.185	6.13297e-07				Gphn	3.94894e-09	-1.09711	0.944	1	9.3665e-05
Nupr1	4.17014e-11	2.89693	0.972	0.889	9.89116e-07				Tef	4.60603e-09	-2.06574	0.333	0.852	0.00010925
Psmb9	4.40349e-11	6.54336	0.785	0	1.04446e-06				Pck1	5.89998e-09	-2.88033	0.125	0.593	0.000139942
Psmb8	5.03058e-11	6.40434	0.792	0.037	1.1932e-06				mt-Nd5	6.22193e-09	-2.14048	0.299	0.852	0.000147578
Ly6e	7.36158e-11	3.80573	0.847	0.111	1.74609e-06				Pth1r	7.66797e-09	-1.12964	0.868	1	0.000181877
Tapbp	8.86929e-11	2.53321	0.917	0.667	2.10371e-06				Sord	7.81932e-09	-2.91705	0.139	0.63	0.000185466
Tap1	3.31317e-10	3.82238	0.806	0.148	7.85852e-06				Gm15564	8.65996e-09	-1.94933	0.292	0.815	0.000205406
Samhd1	4.81988e-09	2.79356	0.833	0.333	0.000114323				mt-Nd4	8.80532e-09	-1.77001	0.688	1	0.000208853
Igfbp7	9.35658e-09	1.09132	1	1	0.000221929				Gm10801	9.80353e-09	-5.85508	0	0.222	0.00023253
Ifitm3	1.04398e-08	3.92537	0.75	0.185	0.000247622				Acsm5	9.80353e-09	-5.75254	0	0.222	0.00023253
Olfr56	1.42393e-08	5.88004	0.674	0.037	0.000337742				Amn	9.80353e-09	-6.0534	0	0.222	0.00023253
Parp14	1.75679e-08	4.65785	0.681	0.037	0.000416692				Ugt3a1	9.80353e-09	-6.00214	0	0.222	0.00023253
H2-Ab1	2.3772e-08	4.12177	0.708	0.074	0.000563848				Ak4	1.04155e-08	-4.41057	0.014	0.296	0.000247046
Ubd	4.00676e-08	6.54018	0.632	0	0.000950362				Cyp4a10	1.17726e-08	-4.40425	0.014	0.296	0.000279234
Gm12185	6.13836e-08	4.75239	0.646	0.037	0.00145596				Lars2	1.39416e-08	-1.73368	0.674	1	0.000330681
Ubb	6.14139e-08	1.40567	0.979	0.667	0.00145668				Miox	1.70394e-08	-2.36656	0.118	0.593	0.000404158
Ifit2	6.29252e-08	4.89935	0.646	0.037	0.00149252				Peak1	1.92567e-08	-1.58785	0.708	1	0.000456751
Tap2	8.99069e-08	2.62086	0.771	0.222	0.0021325				Fmo1	2.83704e-08	-2.86626	0.035	0.37	0.000672917
Gm4951	9.0321e-08	6.34133	0.611	0	0.00214232				Aldob	3.24886e-08	-2.28196	0.396	0.889	0.000770596
H2-Eb1	1.14066e-07	5.21967	0.632	0.037	0.00270553				0610005C13Rik	3.44769e-08	-3.98597	0.028	0.333	0.000817758
Herc6	1.23872e-07	3.04182	0.729	0.222	0.00293812				Nat8f1	3.89343e-08	-2.63434	0.076	0.481	0.000923482
Oasl2	1.66363e-07	4.40458	0.625	0.037	0.00394596				Gatm	4.03098e-08	-2.65583	0.111	0.556	0.000956109
Psmb10	1.92294e-07	4.43983	0.625	0.037	0.00456102				Slc13a3	4.96646e-08	-3.41783	0.028	0.333	0.00117799
Bst2	2.06684e-07	4.33321	0.625	0.037	0.00490234				Fbp1	6.2287e-08	-3.69689	0.042	0.37	0.00147739
Ifit3	2.08229e-07	3.30226	0.708	0.148	0.00493898				Prkce	6.5541e-08	-1.46078	0.688	0.963	0.00155457
Ly6a	2.87555e-07	2.47893	0.75	0.185	0.00682051				mt-Atp8	9.40625e-08	-3.18095	0.056	0.407	0.00223107
Chd9	3.27397e-07	1.34695	0.972	0.815	0.00776554				mt-Co2	1.71788e-07	-1.60732	0.694	1	0.00407465
Tgtp2	3.30836e-07	5.63747	0.576	0	0.0078471				Hsd3b2	1.81031e-07	-5.634	0	0.185	0.00429387
Rnf213	3.5079e-07	2.336	0.799	0.407	0.00832039				Gm16010	1.81031e-07	-6.17977	0	0.185	0.00429387
Stat2	1.2171e-06	3.00143	0.674	0.222	0.0288683				AY036118	2.61956e-07	-1.03819	1	1	0.00621333
Pros1	1.78456e-06	1.70107	0.84	0.63	0.0423279				Aff3	2.97631e-07	-1.91006	0.479	0.889	0.0070595
Psme1	1.86908e-06	1.98245	0.75	0.333	0.0443328				Akr1c21	3.35559e-07	-2.23609	0.09	0.481	0.00795913
H2-Aa	2.02066e-06	3.75723	0.604	0.074	0.047928				Acsm2	3.49969e-07	-2.56041	0.194	0.63	0.00830091
									Proc	3.5474e-07	-2.66535	0.035	0.333	0.00841408
									Angptl2	4.43758e-07	-1.53269	0.521	0.926	0.0105255
									Slc22a12	5.13665e-07	-2.65346	0.062	0.407	0.0121836
									Bhlhe41	6.36139e-07	-2.58472	0.104	0.481	0.0150886
									Alpl	8.17363e-07	-3.53868	0.028	0.296	0.019387
									Chd3	1.0223e-06	-1.41955	0.194	0.704	0.0242478
									mt-Co1	1.34029e-06	-1.33176	0.833	1	0.0317904
									mt-Co3	1.37681e-06	-1.70971	0.722	1	0.0326567
									Ces1f	1.37905e-06	-3.82018	0.021	0.259	0.0327098
									Mgat3	1.61253e-06	-3.3362	0.021	0.259	0.0382477
									Adcy5	1.97378e-06	-1.5547	0.215	0.667	0.0468162

## Sheet: Podo.bc.to.bl6
Table S2: Results from differential gene expression TCMR vs. Control
Differential expression was assessed using two-sided Wilcoxon rank-sum tests with Benjamini–Hochberg correction for multiple testing.
Podocytes			*This Fold Change was calculated between [BALB/c to C57BL/6 ] and [BALB/c to BALB/c]
Gene upr.	p_val	avg_log2FC*	pct.1	pct.2	p_val_adj				Gene downr.	p_val	avg_log2FC*	pct.1	pct.2	p_val_adj
B2m	1.93016e-21	5.93151	1	0.378	4.57815e-17				Nphs1	4.40776e-14	-1.10906	0.923	1	1.04548e-09
H2-K1	2.23897e-21	5.1867	1	0.467	5.31061e-17				Thsd7a	6.72557e-12	-1.1007	1	1	1.59524e-07
H2-D1	2.82382e-21	4.21743	1	0.778	6.69783e-17				Gm26870	8.33306e-10	-5.35259	0.011	0.4	1.97652e-05
Iigp1	7.74539e-21	10.3158	0.967	0	1.83713e-16				Nlk	2.25698e-08	-1.20441	0.802	1	0.000535332
Spp1	6.33302e-20	3.91121	0.989	0.489	1.50213e-15				Slain2	3.59891e-08	-1.32112	0.484	0.889	0.000853625
H2-T23	1.82507e-19	3.67544	0.989	0.4	4.32887e-15				Elmo1	4.92804e-08	-1.51642	0.67	0.911	0.00116888
Cd74	4.43522e-19	6.5155	0.934	0.067	1.05199e-14				Ephb1	1.20246e-07	-1.06534	0.725	0.956	0.00285213
Irgm1	1.01264e-18	7.03734	0.912	0.044	2.40189e-14				Lypd1	1.43748e-07	-2.87636	0.066	0.444	0.00340955
Gbp2b	1.10594e-18	6.11418	0.923	0.089	2.62317e-14				Gm9869	2.2157e-07	-2.78071	0.033	0.378	0.00525542
Gbp8	1.2425e-18	8.69285	0.901	0	2.94708e-14				Mast4	2.56851e-07	-1.07795	0.857	0.978	0.00609225
Tapbp	1.63586e-18	3.29299	0.978	0.489	3.88009e-14				Syne1	2.62641e-07	-1.16802	0.604	0.956	0.00622959
Stat1	3.23847e-18	3.3966	0.989	0.4	7.68133e-14				Prkg1	3.62769e-07	-1.05319	0.956	0.978	0.00860453
Psmb9	2.02329e-17	6.88416	0.868	0.022	4.79904e-13				St6gal1	9.18222e-07	-1.09332	0.747	0.956	0.0217793
Psmb8	2.02329e-17	7.32537	0.868	0.022	4.79904e-13				Wt1os	9.97204e-07	-1.09211	0.637	0.978	0.0236527
H2-Q4	3.8607e-17	3.85352	0.912	0.133	9.15719e-13
Gbp7	6.13146e-17	5.19201	0.89	0.156	1.45432e-12
Irgm2	1.74547e-16	4.48885	0.879	0.133	4.14007e-12
Gbp3	1.39422e-15	6.24831	0.813	0.022	3.30696e-11
Tap1	3.45804e-15	4.6467	0.824	0.067	8.20212e-11
Gbp2	5.00803e-15	6.79955	0.791	0.022	1.18785e-10
Tap2	7.73531e-15	4.60078	0.824	0.156	1.83474e-10
H2-Ab1	1.06536e-14	5.93237	0.791	0.044	2.52692e-10
Serping1	1.11391e-14	6.10778	0.78	0.022	2.64208e-10
Cd274	1.45127e-13	7.05479	0.736	0.022	3.44227e-09
Fth1	5.37981e-13	1.66101	0.989	0.867	1.27604e-08
Irf1	1.57075e-12	5.45782	0.714	0.044	3.72565e-08
Ly6a	3.22114e-12	3.71931	0.769	0.111	7.64023e-08
H2-Eb1	3.51825e-12	7.09786	0.67	0	8.34493e-08
Ubd	3.51825e-12	6.91055	0.67	0	8.34493e-08
H2-Aa	3.87706e-12	6.53142	0.681	0.022	9.19601e-08
Timp3	1.09065e-11	1.68868	1	0.956	2.5869e-07
Bst2	5.55815e-11	4.56998	0.67	0.067	1.31834e-06
Olfr56	6.70951e-11	6.56093	0.615	0	1.59143e-06
Ifitm3	9.6521e-11	5.88307	0.637	0.044	2.28938e-06
Psmb10	1.02154e-10	4.32759	0.659	0.067	2.42299e-06
H2-Q6	3.57599e-10	6.17533	0.582	0	8.4819e-06
Parp14	6.03747e-10	5.40518	0.604	0.044	1.43203e-05
Nupr1	1.13211e-09	2.51103	0.978	0.844	2.68526e-05
Tpt1	2.32425e-09	1.29995	0.956	0.8	5.51288e-05
H2-Q7	2.5401e-09	1.80013	0.901	0.533	6.02486e-05
Gm4951	5.0062e-09	6.56915	0.527	0	0.000118742
mt-Co1	6.57556e-09	1.56563	0.923	0.578	0.000155966
Mfge8	6.82923e-09	2.19907	0.769	0.311	0.000161983
Calr	1.24782e-08	1.33645	0.923	0.711	0.000295971
AW112010	1.36857e-08	6.21239	0.505	0	0.000324612
Rpl27a	1.45519e-08	1.61839	0.857	0.6	0.000345157
Stat2	1.55459e-08	3.00686	0.648	0.133	0.000368733
Ly6e	2.0713e-08	5.62347	0.516	0.022	0.000491293
Oasl2	2.23968e-08	6.02597	0.495	0	0.000531229
Gm12185	2.65774e-08	4.74822	0.516	0.022	0.00063039
Actb	4.29578e-08	1.10962	0.989	0.956	0.00101892
Nlrc5	5.48136e-08	3.82206	0.549	0.067	0.00130012
Ftl1	5.62568e-08	1.20274	0.956	0.711	0.00133436
Cd52	9.43261e-08	6.10862	0.462	0	0.00223732
Tgtp2	9.43261e-08	6.00708	0.462	0	0.00223732
Col18a1	1.18361e-07	1.2808	0.912	0.711	0.00280739
mt-Co3	1.21963e-07	1.52141	0.934	0.644	0.00289284
Cxcl10	1.5037e-07	6.62554	0.451	0	0.00356664
Rnf213	1.72648e-07	2.19646	0.692	0.289	0.00409503
Psap	1.84624e-07	1.34034	0.868	0.667	0.00437909
Tmem176a	1.99784e-07	2.1699	0.747	0.311	0.00473867
Fgfbp1	2.15137e-07	3.5916	0.593	0.178	0.00510283
Ifi27	2.23658e-07	2.17468	0.692	0.267	0.00530495
Hsp90b1	3.54044e-07	1.23779	0.912	0.644	0.00839757
Xaf1	4.12154e-07	5.06114	0.451	0.022	0.00977587
Rps29	5.3804e-07	1.3249	0.912	0.578	0.0127618
Hspa5	6.05043e-07	1.36564	0.89	0.667	0.014351
Crim1	8.21618e-07	1.0088	1	0.956	0.019488
Rplp1	9.66384e-07	1.15898	0.879	0.622	0.0229217
Hsd17b4	1.00103e-06	1.77385	0.736	0.333	0.0237434
Rtp4	1.14422e-06	2.94004	0.484	0.044	0.0271398
Sparc	1.36001e-06	1.05499	0.989	0.933	0.0322581
Ifit3	1.66359e-06	3.90117	0.429	0.022	0.0394586
Selenok	1.8367e-06	1.61325	0.758	0.444	0.0435647
Psme1	2.06676e-06	2.27734	0.615	0.244	0.0490216

## Sheet: PT.bl6.to.bc
Table S2: Results from differential gene expression TCMR vs. Control
Differential expression was assessed using two-sided Wilcoxon rank-sum tests with Benjamini–Hochberg correction for multiple testing.
Proximal Tubules			*This Fold Change was calculated between [C57BL/6 to BALB/c ] and [C57BL/6 to C57BL/6]
Gene upr.	p_val	avg_log2FC*	pct.1	pct.2	p_val_adj				Gene downr.	p_val	avg_log2FC*	pct.1	pct.2	p_val_adj
Iigp1	0	6.79956	0.985	0.035	0				Slc22a28	0	-3.39613	0.15	0.851	0
Gbp2	0	8.15889	0.906	0.01	0				Rdh16f2	0	-4.43019	0.071	0.754	0
Cd74	0	5.74293	0.985	0.12	0				Tln2	0	-3.4744	0.213	0.89	0
Ly6e	0	6.08414	0.915	0.057	0				Ces1d	0	-4.19741	0.086	0.751	0
Ubd	0	9.52356	0.859	0.004	0				Slc22a8	0	-4.00737	0.105	0.768	0
Gm20663	0	8.08686	0.873	0.025	0				Gm26870	0	-5.45293	0.032	0.692	0
H2-D1	0	5.05133	0.969	0.147	0				Ak4	0	-3.61657	0.15	0.809	0
Gm4951	0	8.54754	0.822	0.006	0				Slc22a30	0	-3.17709	0.154	0.808	0
H2-Q7	0	8.10191	0.797	0.009	0				Nat8f1	0	-3.47995	0.135	0.785	0
H2-K1	0	5.67351	0.998	0.222	0				Nat8f3	0	-3.77697	0.15	0.773	0
Parp14	0	5.38351	0.816	0.047	0				Ces1f	0	-3.04123	0.176	0.793	0
Gbp7	0	4.95326	0.895	0.129	0				Hsd3b2	0	-2.57102	0.176	0.771	0
Irgm1	0	4.61037	0.89	0.129	0				Gm39033	0	-4.23851	0.06	0.645	0
Gbp8	0	8.62206	0.761	0.006	0				Ugt3a2	0	-2.25288	0.269	0.846	0
H2-Aa	0	5.55151	0.793	0.045	0				Hsd3b3	0	-2.32066	0.226	0.802	0
H2-Ab1	0	5.16822	0.811	0.068	0				Xylt1	0	-2.76748	0.252	0.827	0
Irgm2	0	4.81422	0.806	0.065	0				Miox	0	-2.4697	0.357	0.93	0
H2-Eb1	0	5.59738	0.782	0.047	0				Rdh16	0	-2.30644	0.219	0.782	0
Nlrc5	0	5.33504	0.783	0.055	0				4930533I22Rik	0	-4.9355	0.055	0.609	0
Ly6a	0	4.33206	0.923	0.198	0				Fmo1	0	-2.22209	0.263	0.815	0
Stat1	0	4.58488	0.926	0.203	0				Acaa1b	0	-3.0108	0.181	0.732	0
Irf1	0	4.93687	0.77	0.049	0				Akr1c21	0	-2.29417	0.368	0.916	0
Ciita	0	5.32719	0.763	0.048	0				Eci3	0	-3.40297	0.092	0.635	0
Vcam1	0	7.27744	0.72	0.009	0				Ctnna2	0	-4.83385	0.05	0.591	0
B2m	0	4.54762	0.984	0.296	0				Hlf	0	-2.05335	0.308	0.848	0
H2-Q4	0	5.56818	0.727	0.039	0				Hnf4aos	0	-2.74881	0.427	0.966	0
Il34	0	4.41519	0.838	0.153	0				Pbld1	0	-2.08437	0.355	0.886	0
Olfr56	0	6.83031	0.698	0.013	0				Gm6999	0	-2.99304	0.145	0.674	0
Psmb8	0	6.78574	0.67	0.014	0				Slc22a18	0	-2.00337	0.358	0.882	0
Gm12216	0	5.82277	0.68	0.025	0				0610005C13Rik	0	-2.06349	0.405	0.928	0
Tmsb4x	0	4.54346	0.859	0.213	0				Fbp1	0	-2.17467	0.407	0.927	0
F830016B08Rik	0	6.7798	0.624	0.006	0				Nat8f6	0	-4.10383	0.083	0.598	0
Gm12185	0	6.91859	0.627	0.01	0				Slc6a20b	0	-2.17689	0.425	0.937	0
Cxcl10	0	5.98976	0.626	0.011	0				Col27a1	0	-2.53889	0.143	0.651	0
Serping1	0	7.12301	0.614	0.012	0				AI314278	0	-1.62471	0.333	0.837	0
Cd274	0	6.95222	0.605	0.016	0				Prex2	0	-3.48918	0.078	0.577	0
H2-Q6	0	7.86382	0.583	0.006	0				Pdzd2	0	-2.00291	0.476	0.973	0
AW112010	0	7.76995	0.58	0.006	0				Slc13a3	0	-2.96863	0.205	0.693	0
Zfp981	0	4.93529	0.908	0.336	0				Tcn2	0	-1.98672	0.421	0.906	0
Snx10	0	5.13808	0.618	0.046	0				Gm17276	0	-2.89104	0.106	0.59	0
Gm4841	0	7.41499	0.576	0.004	0				Slc25a42	0	-2.20796	0.235	0.717	0
Nfkbiz	0	3.48255	0.766	0.198	0				Pck1	0	-2.05948	0.408	0.888	0
Gbp3	0	5.82597	0.592	0.028	0				Gatm	0	-2.8394	0.262	0.742	0
Gm42031	0	4.731	0.678	0.12	0				4732463B04Rik	0	-2.05852	0.25	0.73	0
Gvin1	0	7.15896	0.536	0.007	0				mt-Cytb	0	-2.04481	0.474	0.952	0
Tap1	0	5.47955	0.54	0.022	0				Hgd	0	-1.72462	0.435	0.912	0
Rnf213	0	3.14001	0.777	0.263	0				Pah	0	-2.50174	0.346	0.821	0
Tap2	0	4.42629	0.561	0.053	0				Pecr	0	-1.78912	0.396	0.87	0
Akt3	0	4.13655	0.585	0.081	0				Acnat1	0	-2.07307	0.336	0.809	0
Plac8	0	5.17728	0.55	0.046	0				Dnajc6	0	-2.07606	0.285	0.756	0
Ifit2	0	5.15761	0.522	0.02	0				Aldh8a1	0	-1.81115	0.295	0.766	0
Tapbp	0	3.51641	0.618	0.117	0				Nlrp6	0	-2.43355	0.157	0.628	0
Psmb9	0	6.13135	0.515	0.015	0				Ranbp3l	0	-1.74773	0.268	0.738	0
Atp8a1	0	3.17301	0.641	0.144	0				C330002G04Rik	0	-2.55608	0.148	0.618	0
Tnfsf10	0	3.25713	0.669	0.177	0				mt-Nd5	0	-1.86455	0.235	0.704	0
Herc6	0	3.52867	0.629	0.138	0				Car12	0	-3.17093	0.179	0.643	0
H2-T23	0	3.51465	0.601	0.118	0				Sord	0	-2.54746	0.522	0.986	0
Il7	0	4.39608	0.571	0.103	0				Gm42397	0	-3.36464	0.412	0.872	0
Gbp5	0	6.6614	0.475	0.007	0				Dhtkd1	0	-2.33898	0.171	0.63	0
Tmsb10	0	4.88896	0.497	0.035	0				Slc22a22	0	-4.21807	0.033	0.491	0
Ypel2	0	3.09475	0.745	0.284	0				Galnt11	0	-1.86352	0.441	0.898	0
Lyz2	0	7.08713	0.457	0.008	0				Igfbp4	0	-1.62908	0.332	0.787	0
Gm16685	0	2.89683	0.971	0.525	0				Plekha6	0	-1.85018	0.304	0.757	0
Parp9	0	2.79426	0.614	0.185	0				Slc34a1	0	-3.06135	0.515	0.968	0
C4b	0	5.83022	0.444	0.016	0				Gpr137b	0	-1.84472	0.318	0.77	0
Xdh	0	3.13649	0.643	0.218	0				Pcx	0	-1.76793	0.354	0.805	0
Tmem140	0	2.46252	0.681	0.263	0				Fmo2	0	-2.15164	0.319	0.768	0
Tgtp2	0	7.56357	0.421	0.003	0				Vmn1r20	0	-4.58968	0.03	0.477	0
Nuak2	0	2.20396	0.742	0.33	0				Isoc2a	0	-1.98249	0.225	0.671	0
Bst2	0	4.85828	0.437	0.026	0				Dlg2	0	-3.06158	0.116	0.56	0
Rnf19b	0	3.39114	0.541	0.131	0				Aspa	0	-1.40669	0.474	0.916	0
Tmem252	0	3.09467	0.575	0.165	0				Sgk2	0	-1.75997	0.301	0.743	0
Havcr1	0	5.96627	0.419	0.014	0				Kl	0	-2.01601	0.261	0.703	0
Ccl5	0	7.85449	0.401	0.003	0				Kynu	0	-2.6785	0.203	0.642	0
Pla2g16	0	3.63978	0.472	0.074	0				Ugt3a1	0	-3.38095	0.067	0.506	0
Trafd1	0	3.19734	0.501	0.105	0				Cyp2j11	0	-1.98711	0.261	0.699	0
Zbtb16	0	6.86768	0.405	0.011	0				Slc13a2	0	-2.39648	0.2	0.637	0
Gm4070	0	7.3864	0.395	0.004	0				Khk	0	-1.76571	0.231	0.667	0
Pdgfd	0	3.43807	0.507	0.117	0				Ass1	0	-2.48624	0.508	0.943	0
Clu	0	3.50735	0.471	0.081	0				mt-Nd3	0	-2.67656	0.101	0.535	0
Lcn2	0	5.77344	0.4	0.011	0				G6pc	0	-2.2857	0.177	0.609	0
Litaf	0	3.57136	0.452	0.063	0				Xpnpep1	0	-1.74411	0.369	0.8	0
Zbp1	0	8.87754	0.389	0.001	0				Tmem27	0	-1.56034	0.439	0.87	0
Pfkp	0	3.29454	0.499	0.111	0				Fras1	0	-1.67479	0.311	0.742	0
Tmcc3	0	2.70013	0.736	0.35	0				Aldh9a1	0	-2.23796	0.163	0.594	0
Msn	0	2.20818	0.737	0.356	0				Lpar3	0	-2.22409	0.175	0.605	0
Gm20696	0	5.11356	0.404	0.025	0				Adhfe1	0	-1.67945	0.401	0.83	0
Naaladl2	0	2.862	0.571	0.199	0				Acsm5	0	-2.69387	0.148	0.577	0
Clec2d	0	2.37433	0.766	0.395	0				Alpl	0	-2.24079	0.235	0.662	0
Stat3	0	1.93371	0.744	0.399	0				Lrpap1	0	-1.6329	0.237	0.662	0
Ptbp3	0	1.84645	0.737	0.438	0				Macrod2	0	-1.50159	0.496	0.919	0
Map3k1	0	1.90014	0.704	0.406	0				Slc5a11	0	-1.90556	0.183	0.606	0
Aig1	0	1.721	0.76	0.463	0				Slc22a4	0	-1.7395	0.279	0.702	0
Atp11a	0	1.603	0.846	0.565	0				Abat	0	-1.57074	0.317	0.738	0
Slco3a1	0	1.91656	0.921	0.671	0				Ksr2	0	-1.96754	0.206	0.626	0
Gls	0	1.81001	0.788	0.564	0				Cat	0	-1.64621	0.429	0.849	0
Spp1	0	3.15291	0.996	0.81	0				Slc7a9	0	-1.6032	0.345	0.764	0
Vmp1	0	1.66765	0.914	0.734	0				Slc2a2	0	-1.86218	0.253	0.667	0
Immp2l	0	1.28074	0.948	0.769	0				Sirt3	0	-1.59939	0.29	0.703	0
Rock2	0	1.51484	0.84	0.69	0				Gm10804	0	-1.7519	0.219	0.631	0
Nfat5	0	1.39954	0.888	0.761	0				Tef	0	-1.51696	0.492	0.903	0
Ndrg1	0	1.59245	0.923	0.802	0				Hykk	0	-1.52621	0.397	0.807	0
Fhod3	0	1.99993	0.94	0.835	0				Baiap2	0	-1.6491	0.301	0.711	0
Chd9	0	3.54877	0.998	0.924	0				Kmo	0	-2.59736	0.09	0.499	0
Rbpms	0	1.8055	0.97	0.9	0				Acvr2b	0	-2.73068	0.134	0.541	0
Igsf5	0	1.39502	0.968	0.906	0				Mertk	0	-1.38323	0.411	0.818	0
Mast4	0	1.02686	0.98	0.948	0				Slc35f3	0	-1.65277	0.364	0.77	0
Syne2	0	1.17656	0.968	0.943	0				Map2k6	0	-1.46874	0.346	0.75	0
Neat1	0	1.58396	0.997	0.983	0				Lipa	0	-2.13622	0.325	0.729	0
Apoe	2.14479e-307	2.49617	0.604	0.23	5.08723e-303				Prodh2	0	-2.44168	0.117	0.52	0
S100a11	3.57456e-307	2.25953	0.612	0.249	8.47851e-303				Cmbl	0	-2.23349	0.145	0.548	0
Sash1	7.58697e-307	1.72235	0.794	0.603	1.79955e-302				4931406C07Rik	0	-1.34455	0.431	0.833	0
Tinagl1	6.48363e-306	5.16933	0.396	0.025	1.53785e-301				Asl	0	-2.38869	0.162	0.564	0
Cd52	1.4503e-305	5.99679	0.381	0.014	3.43996e-301				Pik3c2g	0	-2.50478	0.384	0.783	0
Rps20	1.83628e-303	1.7862	0.716	0.416	4.35546e-299				Cyp4a10	0	-2.36288	0.116	0.514	0
S100a10	1.84049e-298	2.55283	0.557	0.189	4.36545e-294				Upb1	0	-1.5197	0.346	0.744	0
Ngf	7.6585e-297	6.46411	0.363	0.005	1.81652e-292				Ppargc1b	0	-1.42947	0.339	0.733	0
Ifitm3	1.1059e-292	5.21743	0.38	0.022	2.62308e-288				Ttc36	0	-1.34205	0.39	0.783	0
Gsr	3.97803e-292	1.73283	0.706	0.437	9.43549e-288				Slc16a9	0	-2.0622	0.368	0.76	0
Camk2b	1.44244e-291	5.29204	0.405	0.045	3.42133e-287				Cdkl1	0	-2.56856	0.126	0.518	0
Stat2	7.31182e-291	2.32932	0.573	0.213	1.73429e-286				mt-Nd1	0	-1.53981	0.491	0.883	0
Ubb	1.38464e-288	1.69032	0.731	0.458	3.28422e-284				Dennd3	0	-1.48506	0.305	0.697	0
Cd47	8.16548e-287	2.19678	0.587	0.235	1.93677e-282				Igfbp5	0	-1.83679	0.106	0.497	0
Tsc22d1	8.26859e-285	1.68789	0.702	0.414	1.96123e-280				mt-Nd4l	0	-1.93454	0.172	0.563	0
Fkbp5	6.74776e-284	3.14648	0.536	0.2	1.6005e-279				Lin7a	0	-4.14736	0.037	0.426	0
Pigr	7.88234e-284	2.62967	0.499	0.129	1.86961e-279				Cryl1	0	-2.38412	0.602	0.991	0
Cp	1.48227e-279	3.60613	0.503	0.157	3.51579e-275				Smarca2	0	-1.68894	0.504	0.893	0
Klf6	1.39797e-278	2.87555	0.497	0.14	3.31584e-274				Papss2	0	-1.89686	0.455	0.844	0
Oasl2	4.60321e-278	6.92486	0.342	0.004	1.09183e-273				Mgat3	0	-1.66453	0.21	0.596	0
Samhd1	3.78898e-275	3.1917	0.471	0.117	8.98708e-271				Cmah	0	-1.45951	0.378	0.763	0
Ifi204	3.61697e-270	8.63001	0.33	0.001	8.57909e-266				Limch1	0	-2.33939	0.156	0.54	0
Clic1	3.08616e-267	2.23769	0.568	0.228	7.32007e-263				Fam13a	0	-1.3365	0.423	0.805	0
Ifi27	2.02001e-266	2.92288	0.449	0.094	4.79127e-262				Dbp	0	-2.39208	0.097	0.479	0
AC135964.2	3.61994e-265	2.02944	0.694	0.429	8.58613e-261				Bphl	0	-1.38838	0.366	0.748	0
Tpt1	1.73564e-264	1.24644	0.866	0.729	4.11676e-260				Slc7a8	0	-2.19888	0.272	0.653	0
Serpina10	4.03451e-264	5.62581	0.339	0.01	9.56945e-260				Adtrp	0	-1.92	0.233	0.613	0
Ppp1r12a	1.14912e-263	1.07538	0.86	0.771	2.72559e-259				Dnase1	0	-4.75356	0.027	0.407	0
Psme1	1.61735e-263	3.37061	0.417	0.072	3.8362e-259				Folr1	0	-1.35586	0.547	0.926	0
Myof	1.76619e-260	2.35285	0.539	0.196	4.18922e-256				St8sia1	0	-1.30342	0.437	0.816	0
Rps29	9.67919e-259	1.6895	0.727	0.467	2.29581e-254				Tmem106a	0	-1.51204	0.397	0.775	0
Psmb10	1.63745e-256	5.25468	0.34	0.017	3.88386e-252				Cpeb3	0	-2.54737	0.6	0.978	0
Gna13	2.22809e-255	1.77607	0.644	0.357	5.28481e-251				Chd3	0	-1.43369	0.447	0.825	0
Bspry	1.45927e-254	2.92315	0.445	0.103	3.46124e-250				Gm32569	0	-2.04451	0.15	0.526	0
Gdf15	2.41812e-252	3.62792	0.393	0.059	5.73554e-248				Cyfip2	0	-1.88994	0.221	0.597	0
Bcl2l1	1.42588e-251	1.2976	0.782	0.601	3.38204e-247				mt-Nd2	0	-2.20423	0.611	0.986	0
Sh3bgrl3	3.83137e-248	3.75685	0.378	0.05	9.08763e-244				Vmn1r18	0	-3.37391	0.048	0.422	0
Parp11	1.16669e-247	2.78978	0.468	0.14	2.76727e-243				Vegfa	0	-1.3568	0.362	0.736	0
Ifi207	1.41339e-247	9.71896	0.307	0.001	3.35241e-243				Gcdh	0	-1.73001	0.181	0.553	0
Rps24	2.17615e-246	1.73584	0.671	0.39	5.16162e-242				B3gat2	0	-1.30603	0.473	0.845	0
Tmc1	2.27727e-244	7.27656	0.309	0.004	5.40145e-240				Fpgs	0	-2.26089	0.121	0.493	0
Eef1a1	8.46358e-243	1.04175	0.927	0.848	2.00748e-238				Tmem178	0	-2.91718	0.064	0.436	0
Sema3c	1.94365e-242	1.63325	0.733	0.514	4.61015e-238				Slc9a3	0	-1.69648	0.303	0.674	0
Slc41a2	1.50041e-240	2.09362	0.549	0.233	3.55882e-236				Haao	0	-2.63598	0.078	0.448	0
Ptpn13	8.51987e-237	1.28683	0.917	0.884	2.02083e-232				Slc22a1	0	-1.23091	0.47	0.839	0
Fbxw17	6.4926e-232	2.93942	0.406	0.083	1.53998e-227				Slc22a6	0	-1.77551	0.274	0.635	0
Dtx3l	1.39702e-231	3.47728	0.368	0.054	3.3136e-227				Sufu	0	-1.2636	0.429	0.787	0
Adgrg1	4.65316e-230	2.20192	0.517	0.2	1.10368e-225				Pank1	0	-1.51323	0.377	0.734	0
Col18a1	6.02919e-230	2.51268	0.476	0.158	1.43006e-225				Slc5a2	0	-2.25926	0.166	0.522	0
Gmds	1.43402e-229	1.46062	0.722	0.473	3.40135e-225				Aacs	0	-2.61792	0.113	0.468	0
Parp3	3.82073e-226	2.53211	0.456	0.141	9.06238e-222				Gpd1	0	-2.11285	0.115	0.469	0
Tmem176b	1.38209e-225	1.24794	0.786	0.633	3.27818e-221				Gm31718	0	-2.19267	0.193	0.546	0
Trim12a	1.78054e-225	3.9207	0.337	0.035	4.22326e-221				Aass	0	-1.22387	0.539	0.89	0
C3	6.66687e-224	4.92666	0.314	0.02	1.58132e-219				Slc17a1	0	-1.20531	0.605	0.954	0
Arhgap15	7.87052e-224	2.60348	0.475	0.162	1.86681e-219				Nmrk1	0	-1.17217	0.521	0.87	0
Parp12	5.74213e-223	4.17703	0.32	0.024	1.36198e-218				Cubn	0	-2.04286	0.644	0.992	0
Gm26632	1.04708e-222	2.73137	0.461	0.156	2.48357e-218				Tnfaip8	0	-3.30976	0.612	0.956	0
Nmi	1.19838e-222	2.66137	0.427	0.111	2.84243e-218				Amn	0	-2.07311	0.114	0.457	0
Fat1	1.31169e-222	2.02186	0.553	0.256	3.11119e-218				Car14	0	-4.45988	0.02	0.362	0
Lrch1	1.42851e-221	1.82354	0.606	0.326	3.38829e-217				Srr	0	-1.17339	0.511	0.851	0
Cdk6	8.88938e-217	1.45938	0.732	0.551	2.10847e-212				Cyp51	0	-3.84218	0.047	0.384	0
Parp10	4.18774e-214	2.04723	0.508	0.202	9.93291e-210				Acsm2	0	-1.41913	0.573	0.909	0
Patl2	2.40056e-212	5.13137	0.294	0.015	5.69389e-208				Lrp4	0	-2.14978	0.109	0.445	0
Utrn	3.4633e-212	1.93305	0.501	0.174	8.21461e-208				Egf	0	-3.15563	0.046	0.381	0
Lypd6b	5.69734e-212	5.36227	0.292	0.014	1.35135e-207				Slc28a1	0	-2.46615	0.086	0.42	0
Unc93b1	1.96395e-209	3.69934	0.325	0.037	4.6583e-205				Cyp2a4	0	-3.82191	0.03	0.362	0
Zfp36l1	3.35273e-209	1.68811	0.653	0.414	7.95234e-205				Chrna4	0	-3.79317	0.042	0.373	0
Rtn4	3.95878e-208	1.84218	0.573	0.296	9.38984e-204				Clec2h	0	-3.12198	0.06	0.388	0
Cxcl9	6.90023e-206	6.72616	0.267	0.002	1.63666e-201				D630029K05Rik	0	-4.22567	0.02	0.348	0
Gm47283	2.53599e-204	3.36565	0.345	0.057	6.0151e-200				Prlr	0	-4.50153	0.034	0.359	0
Trpm3	1.01719e-202	2.63527	0.484	0.209	2.41268e-198				Slc22a23	0	-2.11118	0.55	0.874	0
2810474O19Rik	5.77758e-202	1.58051	0.697	0.527	1.37038e-197				Por	0	-1.36613	0.552	0.875	0
Zc3hav1	3.13894e-201	2.50354	0.414	0.116	7.44525e-197				Spp2	0	-3.62958	0.038	0.36	0
Mylip	8.03714e-201	1.67272	0.625	0.398	1.90633e-196				Pdzk1	0	-1.93079	0.66	0.982	0
Susd1	1.48624e-198	3.20111	0.348	0.062	3.52522e-194				Cit	0	-2.26816	0.095	0.417	0
Tns3	4.83586e-198	1.04593	0.829	0.755	1.14702e-193				Slco1a6	0	-1.69709	0.593	0.914	0
Ttc39b	5.55158e-198	2.87512	0.381	0.091	1.31678e-193				Akr1d1	0	-3.77666	0.041	0.361	0
Sptlc2	3.14969e-197	1.07774	0.824	0.706	7.47074e-193				Oxct1	0	-1.41001	0.588	0.907	0
Abca1	1.2151e-196	1.91525	0.509	0.213	2.8821e-192				Gm15318	0	-3.03333	0.054	0.373	0
Psap	2.13923e-194	1.20355	0.792	0.651	5.07405e-190				Olfm4	0	-2.79033	0.059	0.373	0
Zc2hc1a	3.55073e-192	1.62402	0.63	0.411	8.42197e-188				Phyhipl	0	-2.06158	0.635	0.949	0
Itgb1	9.27901e-191	1.53847	0.638	0.419	2.20089e-186				Slc17a3	0	-1.46228	0.619	0.932	0
Sbno2	2.48136e-189	1.98078	0.54	0.278	5.88554e-185				Aoah	0	-1.32879	0.627	0.94	0
Cd2ap	6.12204e-189	1.11232	0.798	0.681	1.45209e-184				mt-Nd4	0	-1.86734	0.678	0.991	0
S100a6	1.26598e-188	3.22768	0.344	0.069	3.00278e-184				Dmgdh	0	-2.32126	0.087	0.398	0
Btg1	1.30703e-187	2.9136	0.349	0.072	3.10013e-183				Gm37245	0	-1.84038	0.454	0.761	0
Rps9	2.02804e-186	1.56472	0.627	0.387	4.81032e-182				Gstt2	0	-1.18726	0.594	0.896	0
Ifit3	3.16828e-185	5.31891	0.259	0.011	7.51485e-181				Mtus1	0	-1.2549	0.625	0.923	0
Nrg1	9.06156e-185	1.23518	0.857	0.741	2.14931e-180				Fam151a	0	-3.23609	0.038	0.334	0
C1s1	5.18896e-184	6.35427	0.249	0.006	1.23077e-179				Akr1a1	0	-1.45009	0.601	0.897	0
Slc44a3	4.65251e-181	5.49407	0.253	0.011	1.10353e-176				Arhgap32	0	-1.21081	0.602	0.895	0
Gm10073	1.40814e-179	1.53685	0.664	0.449	3.33996e-175				Slc22a29	0	-5.69989	0.007	0.294	0
Psd3	6.47893e-178	4.09092	0.28	0.03	1.53674e-173				Mgll	0	-3.7722	0.031	0.313	0
Slc38a2	1.43961e-177	2.14905	0.435	0.158	3.41461e-173				Lactb2	0	-1.53625	0.689	0.97	0
Vps54	3.89909e-177	1.02313	0.768	0.64	9.24824e-173				Dock9	0	-1.21293	0.639	0.916	0
Spata6	2.14169e-175	1.42071	0.67	0.481	5.07988e-171				Afm	0	-3.17632	0.036	0.31	0
Syt2	2.48332e-175	5.82646	0.242	0.008	5.89019e-171				Sugct	0	-1.82228	0.693	0.961	0
Cd9	7.60461e-175	3.25321	0.316	0.059	1.80374e-170				Gcnt1	0	-1.12831	0.656	0.922	0
Pax8	1.05922e-172	1.24485	0.866	0.816	2.51237e-168				Rgl1	0	-1.41154	0.706	0.968	0
Fmn1	1.41012e-172	1.18742	0.926	0.922	3.34466e-168				Ces1e	0	-4.64086	0.011	0.272	0
Folh1	2.62967e-172	2.0194	0.579	0.365	6.2373e-168				Slc25a13	0	-1.13299	0.699	0.951	0
Lgals3	3.20332e-172	3.81928	0.282	0.035	7.59796e-168				Vmn1r19	0	-4.26569	0.015	0.266	0
Fyb2	5.90242e-172	1.80223	0.578	0.347	1.4e-167				Prkag2	0	-1.09158	0.675	0.925	0
Creb5	2.43412e-170	4.2823	0.244	0.011	5.7735e-166				mt-Co2	0	-1.43807	0.731	0.972	0
Birc3	2.82085e-170	2.89428	0.355	0.095	6.69078e-166				mt-Co3	0	-1.1863	0.742	0.982	0
H2-T22	1.64796e-168	2.34709	0.39	0.126	3.90879e-164				Aldob	0	-1.46729	0.757	0.989	0
Fmnl2	5.23498e-168	2.59065	0.422	0.156	1.24169e-163				P3h2	0	-1.68578	0.757	0.989	0
Erap1	5.51015e-168	2.35415	0.383	0.118	1.30695e-163				Cyp2d26	0	-3.6739	0.018	0.245	0
Cxcl1	1.23176e-167	6.98396	0.23	0.006	2.92161e-163				mt-Atp6	0	-1.48719	0.769	0.993	0
Xaf1	2.39061e-167	5.36482	0.236	0.009	5.67029e-163				Apbb2	0	-1.22061	0.751	0.971	0
Batf2	3.89426e-167	6.15422	0.23	0.006	9.23681e-163				Plekha7	0	-1.11105	0.756	0.972	0
Actb	4.80417e-167	1.20157	0.778	0.654	1.1395e-162				Lrp2	0	-2.56265	0.787	0.999	0
Steap2	6.36745e-167	1.29196	0.745	0.61	1.5103e-162				Keg1	0	-1.15571	0.775	0.986	0
Upp1	1.37579e-166	5.43603	0.233	0.007	3.26325e-162				Fnip2	0	-1.74011	0.783	0.986	0
Zfp697	6.01315e-166	1.05284	0.818	0.755	1.42626e-161				Slc47a1	0	-1.01981	0.796	0.986	0
Socs1	7.09758e-166	8.48325	0.22	0.001	1.68348e-161				Fggy	0	-1.17976	0.833	0.992	0
Esyt2	7.27533e-165	1.1358	0.723	0.604	1.72563e-160				Ncoa7	0	-1.02544	0.824	0.972	0
H2-DMb1	3.4276e-164	3.31594	0.285	0.042	8.12993e-160				Nox4	0	-2.36666	0.799	0.936	0
Zfp950	8.21069e-164	1.09078	0.736	0.602	1.94749e-159				Rab11fip3	0	-1.04832	0.854	0.99	0
AU020206	3.33641e-163	4.00001	0.265	0.031	7.91362e-159				Thrb	0	-1.03039	0.833	0.968	0
Usp18	4.1585e-163	5.86492	0.227	0.006	9.86353e-159				Kap	0	-2.17449	0.903	1	0
Il18bp	9.41139e-163	4.42904	0.248	0.02	2.23229e-158				Cmss1	0	-1.1333	0.903	0.997	0
Rpl32	2.16909e-161	1.39182	0.662	0.464	5.14488e-157				Snx29	0	-1.33823	0.942	0.999	0
Scin	3.40161e-160	3.56704	0.265	0.032	8.06829e-156				Fut9	0	-1.95624	0.952	1	0
Serinc3	5.40954e-160	1.74392	0.516	0.281	1.28309e-155				Ptprd	0	-1.51913	0.976	1	0
Ctss	5.73378e-160	5.4753	0.228	0.01	1.36e-155				Pde4d	0	-1.19517	0.991	1	0
C1qa	6.82721e-159	6.12751	0.219	0.005	1.61935e-154				Gm42418	0	-1.03938	0.999	1	0
Ddx58	1.0302e-158	1.69169	0.486	0.232	2.44353e-154				Slc3a1	5.77959e-308	-1.17384	0.542	0.862	1.37086e-303
H2-DMa	7.42847e-157	4.33554	0.239	0.018	1.76196e-152				Hmgcs1	7.7514e-306	-1.66289	0.262	0.632	1.83856e-301
Dync1h1	8.62992e-155	1.16373	0.669	0.493	2.04693e-150				Sypl2	1.02305e-303	-1.79479	0.163	0.516	2.42658e-299
Cadps2	2.38719e-154	3.0369	0.333	0.091	5.66216e-150				Ppfibp2	4.06933e-303	-1.86447	0.142	0.486	9.65204e-299
Dexi	4.71777e-154	2.34655	0.371	0.123	1.11901e-149				Nipsnap1	2.33169e-302	-1.2975	0.367	0.753	5.53054e-298
Tspo	2.02903e-153	2.05215	0.431	0.182	4.81265e-149				Stard4	1.61587e-298	-2.07719	0.081	0.383	3.83269e-294
Sectm1b	2.5493e-153	2.14376	0.391	0.136	6.04669e-149				Mthfd1	1.89043e-298	-1.4106	0.307	0.688	4.48391e-294
Pfn1	8.17578e-153	1.76926	0.497	0.253	1.93921e-148				Ppara	3.71864e-298	-1.00375	0.637	0.935	8.82023e-294
Rpl9-ps6	3.0868e-152	1.59866	0.567	0.344	7.32158e-148				Acaa2	3.71468e-295	-2.34486	0.081	0.373	8.81085e-291
Rps4x	3.29144e-152	1.74601	0.515	0.286	7.80697e-148				Crocc	4.65175e-295	-1.64694	0.185	0.548	1.10335e-290
Rpl18	8.302e-152	1.52601	0.575	0.353	1.96915e-147				Lyplal1	6.24612e-295	-2.0177	0.131	0.457	1.48152e-290
Specc1	1.89419e-151	2.7874	0.308	0.069	4.49283e-147				Ghr	3.09366e-293	-1.45196	0.982	1	7.33784e-289
Cstb	3.17835e-151	2.56717	0.341	0.098	7.53873e-147				B3galt5	1.41698e-292	-1.31017	0.302	0.697	3.36093e-288
Vim	1.09229e-149	5.38683	0.215	0.009	2.59079e-145				Peli2	2.48365e-291	-1.38507	0.344	0.712	5.89096e-287
Nkain2	1.28478e-149	1.75909	0.614	0.45	3.04736e-145				Bhmt2	1.9587e-288	-1.92173	0.148	0.479	4.64585e-284
Mtss1l	1.06029e-148	5.08102	0.22	0.012	2.51491e-144				Slc22a19	1.04596e-287	-3.78016	0.041	0.281	2.4809e-283
Gm44148	1.57543e-148	1.68285	0.456	0.199	3.73677e-144				Slc26a1	1.55072e-286	-2.37073	0.071	0.35	3.67816e-282
Nfkb1	1.97378e-148	1.53712	0.576	0.358	4.6816e-144				Aqp11	7.38368e-286	-2.2943	0.074	0.356	1.75133e-281
Misp	5.14848e-148	2.984	0.29	0.06	1.22117e-143				Slc2a5	1.54981e-284	-2.09951	0.098	0.401	3.676e-280
Samd4	7.10015e-148	2.55944	0.307	0.07	1.68408e-143				Cyp2e1	6.16582e-284	-2.69101	0.036	0.272	1.46247e-279
Cobl	1.07804e-146	1.1674	0.778	0.717	2.55701e-142				F13b	1.28099e-282	-2.89964	0.029	0.255	3.03838e-278
Sav1	1.60346e-146	2.0484	0.414	0.174	3.80325e-142				Ngef	1.88356e-281	-1.37089	0.32	0.685	4.46761e-277
Csf1	3.97813e-146	6.25916	0.206	0.006	9.43573e-142				Vwce	7.17958e-281	-2.50574	0.055	0.314	1.70292e-276
Icam1	7.37764e-146	2.83364	0.314	0.081	1.7499e-141				Shmt1	4.98039e-280	-2.04047	0.09	0.386	1.1813e-275
Cnot6	1.44576e-145	1.09329	0.716	0.565	3.42919e-141				Gm29012	3.46823e-279	-7.29365	0.001	0.163	8.22629e-275
Sectm1a	3.91094e-145	4.20471	0.229	0.02	9.27636e-141				Aspdh	6.9846e-279	-2.82719	0.033	0.263	1.65668e-274
Gab3	1.80164e-144	3.99253	0.24	0.028	4.27331e-140				Fam214a	4.49352e-278	-1.14614	0.488	0.815	1.06582e-273
H2-DMb2	1.53489e-141	5.80821	0.199	0.005	3.64062e-137				Tcea3	4.87637e-278	-1.54678	0.208	0.565	1.15663e-273
Acnat2	2.5095e-141	2.50408	0.338	0.105	5.95229e-137				Aqp1	4.34805e-275	-1.37684	0.198	0.565	1.03131e-270
Apobec3	7.87891e-141	5.97437	0.197	0.004	1.8688e-136				Gm45083	2.65051e-274	-2.06574	0.094	0.387	6.28674e-270
Pnrc1	1.54337e-140	2.31628	0.378	0.143	3.66073e-136				Slc22a7	1.09875e-273	-4.34531	0.014	0.205	2.60612e-269
Wipf1	4.06211e-139	2.26164	0.37	0.132	9.63492e-135				Nkain1	4.18572e-270	-3.43184	0.022	0.228	9.92811e-266
Irf2	1.48957e-137	1.07244	0.691	0.547	3.53312e-133				Aco2	4.63628e-270	-1.11787	0.506	0.832	1.09968e-265
Mlkl	4.96588e-137	5.1967	0.197	0.006	1.17786e-132				Plcb1	1.89414e-269	-1.09143	0.809	0.878	4.49271e-265
Tnfrsf12a	4.14392e-135	3.7546	0.233	0.03	9.82896e-131				Ece1	2.05726e-269	-1.94356	0.123	0.431	4.8796e-265
Rps8	3.02758e-134	1.1347	0.693	0.541	7.18113e-130				Prkcz	9.45306e-269	-1.2202	0.418	0.767	2.24217e-264
Gm15347	2.21903e-133	3.01206	0.323	0.105	5.26331e-129				Nos1ap	5.67255e-268	-1.2067	0.388	0.744	1.34547e-263
AC133498.1	1.62197e-132	6.76173	0.188	0.005	3.84715e-128				Snx8	8.98525e-268	-1.27433	0.382	0.738	2.13121e-263
Adgrg3	8.19313e-132	4.33505	0.198	0.01	1.94333e-127				Insig1	1.66811e-267	-3.35729	0.021	0.224	3.9566e-263
Ly75	2.54137e-131	6.61129	0.183	0.003	6.02788e-127				Mep1a	2.53423e-265	-1.31772	0.439	0.764	6.01094e-261
Rps27a	2.59139e-130	1.35989	0.585	0.39	6.14651e-126				Bdh2	6.99648e-265	-1.24909	0.367	0.729	1.6595e-260
Cst3	6.44836e-128	1.85158	0.439	0.219	1.52949e-123				Enpp3	8.18044e-265	-1.51449	0.253	0.602	1.94032e-260
C1qb	3.81821e-127	5.24802	0.19	0.01	9.05642e-123				Agxt2	8.21491e-264	-1.34831	0.317	0.672	1.94849e-259
Dgkg	2.00749e-126	1.49628	0.544	0.344	4.76156e-122				Tprkb	5.6815e-263	-1.41907	0.297	0.648	1.34759e-258
Tbl1x	2.45799e-126	1.03235	0.676	0.525	5.83011e-122				Tbxas1	7.65814e-263	-2.37487	0.106	0.389	1.81643e-258
Clic4	7.36654e-126	1.01068	0.793	0.686	1.74727e-121				Cyp2c23	1.17057e-261	-2.85797	0.036	0.259	2.77647e-257
Pxk	1.23303e-125	1.29682	0.547	0.348	2.92462e-121				Alk	1.57992e-260	-2.86964	0.048	0.282	3.74742e-256
Neurl3	1.5734e-125	6.3409	0.179	0.004	3.73194e-121				4833439L19Rik	6.39757e-260	-1.12741	0.46	0.795	1.51744e-255
Ctsc	1.67077e-125	4.61866	0.196	0.014	3.96289e-121				Acat1	7.57736e-260	-1.33573	0.313	0.67	1.79728e-255
Cebpb	2.06851e-125	2.72278	0.289	0.08	4.90629e-121				Ldlr	2.68571e-256	-2.28776	0.067	0.324	6.37024e-252
Rpl19	3.62286e-125	1.13114	0.675	0.513	8.59307e-121				Slc25a51	1.06013e-255	-1.12456	0.447	0.784	2.51453e-251
Mfge8	4.0498e-124	4.46857	0.191	0.012	9.60572e-120				Prss8	7.9498e-254	-1.31505	0.277	0.636	1.88561e-249
Acsl4	3.27912e-123	1.98435	0.441	0.229	7.77774e-119				Nxph1	1.2229e-253	-4.11481	0.011	0.185	2.90059e-249
Rps5	3.00626e-121	1.62993	0.47	0.263	7.13055e-117				Gm16010	1.35657e-253	-2.59061	0.034	0.252	3.21765e-249
C1ra	5.68771e-121	4.31299	0.192	0.015	1.34907e-116				Cndp1	1.38794e-253	-1.86798	0.14	0.446	3.29205e-249
Vwa5a	7.88107e-121	1.96945	0.384	0.172	1.86931e-116				Hacd2	7.19911e-253	-1.19626	0.423	0.747	1.70756e-248
Plppr1	8.75648e-121	4.42136	0.203	0.022	2.07695e-116				Gm30097	8.43604e-253	-2.22791	0.061	0.31	2.00095e-248
Cnn3	9.82922e-121	1.04713	0.676	0.548	2.33139e-116				Stxbp5l	4.53978e-252	-1.37464	0.397	0.723	1.07679e-247
C230088H06Rik	1.58597e-120	2.48058	0.319	0.113	3.76176e-116				Nus1	1.2607e-251	-1.2703	0.377	0.718	2.99025e-247
Oasl1	1.95601e-120	5.14681	0.177	0.006	4.63947e-116				Pxmp2	1.43085e-249	-1.99188	0.104	0.386	3.39384e-245
Rnf180	3.35494e-120	3.96458	0.208	0.026	7.95757e-116				Gsta2	6.13315e-247	-1.73798	0.149	0.456	1.45472e-242
Plekhm3	3.99941e-120	1.51467	0.442	0.219	9.48619e-116				Erlin1	7.37485e-244	-1.23902	0.372	0.713	1.74924e-239
Rbl1	4.07912e-120	2.21833	0.32	0.109	9.67525e-116				Ttr	1.30217e-243	-2.99517	0.04	0.257	3.08862e-239
Actn1	4.72887e-119	2.20878	0.364	0.152	1.12164e-114				Acss2	2.90357e-243	-1.16406	0.561	0.833	6.88698e-239
Lgals3bp	1.11042e-118	3.21399	0.22	0.033	2.6338e-114				Cth	4.02293e-241	-1.59602	0.191	0.511	9.542e-237
Ccl28	2.11209e-118	5.67483	0.193	0.018	5.00967e-114				Cdh4	1.04222e-239	-3.0015	0.037	0.248	2.47204e-235
Gm11808	5.14117e-118	1.16227	0.635	0.472	1.21943e-113				Acadm	2.20333e-239	-1.516	0.354	0.674	5.22608e-235
Arhgap8	5.63022e-118	4.82078	0.18	0.01	1.33543e-113				March6	5.40944e-239	-1.01845	0.546	0.829	1.28307e-234
Grn	3.18725e-117	1.94142	0.379	0.169	7.55983e-113				Slc22a2	1.8625e-237	-1.28035	0.275	0.618	4.41766e-233
Mcc	4.58935e-116	3.34391	0.304	0.106	1.08855e-111				Akr7a5	1.92771e-237	-1.52828	0.181	0.499	4.57233e-233
Irf7	4.65093e-116	4.9496	0.174	0.008	1.10315e-111				Add3	5.94115e-237	-1.21309	0.367	0.707	1.40918e-232
Piezo1	5.07399e-116	1.42807	0.508	0.32	1.2035e-111				Paqr9	2.07669e-236	-1.93667	0.092	0.359	4.9257e-232
Rad51b	7.42956e-116	2.74869	0.269	0.071	1.76222e-111				Sardh	2.98354e-236	-2.07208	0.078	0.331	7.07667e-232
Camk2d	2.57221e-115	1.16058	0.64	0.482	6.10103e-111				Slc34a3	5.73244e-236	-4.53454	0.007	0.163	1.35968e-231
Gm26624	1.88504e-114	1.33483	0.52	0.327	4.47113e-110				mt-Atp8	1.99402e-235	-2.00161	0.081	0.339	4.72962e-231
Serpinb9	9.79586e-114	4.86743	0.171	0.008	2.32348e-109				Dhrs3	1.41144e-234	-1.25325	0.278	0.628	3.34779e-230
Rpl27a	1.45163e-113	1.40952	0.55	0.368	3.44313e-109				Abhd18	3.36608e-234	-1.33332	0.287	0.619	7.98399e-230
Trim12c	2.26138e-112	2.65006	0.246	0.056	5.36378e-108				Sfxn2	4.04349e-234	-1.50712	0.189	0.506	9.59076e-230
Rhob	3.63764e-112	3.20606	0.23	0.047	8.62812e-108				D630023F18Rik	5.96007e-234	-4.50384	0.011	0.172	1.41367e-229
Dysf	1.19279e-111	4.93513	0.171	0.009	2.82917e-107				Cyp2j7	1.69067e-233	-2.2173	0.072	0.317	4.0101e-229
Idnk	3.13444e-111	1.98143	0.336	0.132	7.43457e-107				Tmem64	3.30042e-233	-1.99224	0.108	0.38	7.82827e-229
Zc3h7a	3.65244e-111	1.04008	0.627	0.482	8.66322e-107				Slc22a12	4.57285e-231	-1.18379	0.275	0.627	1.08464e-226
Fgfr2	4.49693e-110	1.01989	0.813	0.788	1.06663e-105				Ppm1l	5.3344e-228	-1.6313	0.227	0.536	1.26527e-223
Fkbp1a	4.5458e-110	1.64782	0.411	0.208	1.07822e-105				Bcl11b	2.01312e-227	-1.42405	0.233	0.557	4.77492e-223
Rgs7	1.19048e-109	5.96978	0.168	0.01	2.8237e-105				Acsl1	2.11877e-227	-1.26413	0.361	0.686	5.02551e-223
Plgrkt	1.49191e-108	1.98078	0.341	0.14	3.53866e-104				Gm10801	7.9731e-227	-6.0836	0.002	0.136	1.89114e-222
Nt5e	3.0025e-107	1.64732	0.472	0.282	7.12163e-103				Dgat2	1.41606e-225	-1.6646	0.152	0.445	3.35875e-221
Anxa2	4.92681e-107	3.91281	0.179	0.017	1.16859e-102				Mcrip2	4.24946e-225	-1.94218	0.075	0.321	1.00793e-220
Mt1	5.9507e-107	1.51944	0.439	0.233	1.41145e-102				Sh3bp5	7.07352e-224	-1.38525	0.252	0.571	1.67777e-219
Vps13c	1.22307e-106	1.49897	0.406	0.197	2.90101e-102				Fmnl1	2.4821e-223	-1.61196	0.151	0.445	5.8873e-219
Adamts1	1.66759e-106	1.89351	0.403	0.202	3.95535e-102				Tfcp2	3.63921e-222	-1.26097	0.365	0.687	8.63184e-218
Dcdc2a	2.31744e-106	2.43022	0.299	0.106	5.49673e-102				Cryzl2	1.04597e-221	-1.17586	0.386	0.706	2.48094e-217
B4galt1	2.35201e-106	1.42969	0.518	0.345	5.57874e-102				Wnt5b	3.82388e-221	-1.96662	0.093	0.349	9.06987e-217
Pycard	3.93004e-105	3.31159	0.199	0.031	9.32167e-101				Grtp1	1.5278e-220	-1.47908	0.205	0.514	3.62378e-216
Hip1r	1.98135e-104	1.4791	0.433	0.239	4.69958e-100				Itpr2	9.60881e-220	-2.4221	0.365	0.58	2.27911e-215
Laptm4a	3.7051e-104	1.34835	0.498	0.315	8.78813e-100				Ugt2b38	1.88804e-219	-1.41666	0.149	0.449	4.47823e-215
Lgals1	6.87678e-104	1.9903	0.358	0.167	1.6311e-99				Aco1	1.60539e-217	-1.18825	0.37	0.687	3.80783e-213
Txn1	7.79113e-104	1.05468	0.61	0.458	1.84798e-99				Acy1	8.46265e-217	-2.62089	0.061	0.283	2.00726e-212
Fau	1.30656e-103	1.17568	0.583	0.417	3.09904e-99				1110019D14Rik	2.22103e-213	-1.23118	0.325	0.641	5.26806e-209
Cxcl16	2.38485e-103	1.80956	0.327	0.125	5.65663e-99				Dnajc12	7.25398e-212	-1.49269	0.171	0.467	1.72057e-207
Tifa	4.8294e-103	2.77595	0.238	0.06	1.14549e-98				Pm20d1	2.57526e-211	-2.35339	0.048	0.255	6.10825e-207
Nfkbia	6.53772e-103	2.43357	0.268	0.082	1.55068e-98				Tmem174	1.07566e-209	-1.07696	0.362	0.698	2.55136e-205
Ifi35	8.02707e-103	2.79887	0.214	0.041	1.90394e-98				Sel1l3	2.12782e-209	-1.12273	0.347	0.673	5.04697e-205
5730559C18Rik	9.6073e-103	2.34518	0.268	0.082	2.27875e-98				Glul	1.4501e-208	-1.53823	0.325	0.624	3.43949e-204
Dync1i2	3.04543e-102	1.09679	0.58	0.425	7.22346e-98				Mgam	1.61464e-208	-1.52835	0.154	0.441	3.82976e-204
Gm14964	8.36286e-102	2.50432	0.241	0.06	1.98359e-97				Mtor	1.09383e-207	-1.05305	0.548	0.806	2.59446e-203
Gm20275	5.67999e-101	1.88888	0.38	0.196	1.34724e-96				Cyp2d12	3.77725e-207	-4.60533	0.004	0.136	8.95927e-203
Tgtp1	1.17131e-100	6.26687	0.144	0.002	2.77823e-96				Pdk2	5.92052e-206	-1.52955	0.174	0.463	1.40429e-201
Rplp0	1.31511e-100	1.18678	0.605	0.459	3.11931e-96				B4galnt3	1.80245e-205	-1.24374	0.279	0.597	4.27522e-201
Hdac7	1.38632e-100	2.53663	0.238	0.061	3.28822e-96				Flvcr2	3.78874e-205	-1.885	0.121	0.379	8.98651e-201
Cdh1	3.11442e-100	1.37889	0.493	0.313	7.38709e-96				L2hgdh	5.35255e-205	-1.35039	0.218	0.523	1.26957e-200
Gm13963	3.15031e-100	2.17038	0.352	0.168	7.47223e-96				Slc25a10	1.9713e-203	-1.3789	0.186	0.485	4.67573e-199
Agrn	6.91072e-100	1.36693	0.494	0.323	1.63915e-95				Acot3	4.71446e-203	-4.97786	0.003	0.13	1.11822e-198
Trim47	1.01143e-99	2.41477	0.25	0.071	2.399e-95				Atxn1	2.40319e-202	-1.11444	0.929	0.985	5.70012e-198
Sp140	1.32585e-99	4.3078	0.163	0.014	3.14479e-95				Atxn7l2	6.33412e-202	-2.30019	0.053	0.259	1.50239e-197
Jazf1	1.61863e-99	4.17844	0.164	0.014	3.83924e-95				Adgrb3	1.37767e-201	-3.68547	0.053	0.252	3.2677e-197
Relb	1.10287e-98	3.65792	0.172	0.019	2.61589e-94				Slc9a8	2.47015e-201	-1.63827	0.349	0.635	5.85894e-197
Fas	1.13439e-98	2.48776	0.249	0.072	2.69066e-94				Aadac	2.83799e-201	-1.5808	0.123	0.388	6.73144e-197
Bcl3	1.49684e-98	3.48768	0.182	0.025	3.55037e-94				Slc35f1	1.60656e-200	-2.74643	0.035	0.219	3.81061e-196
Rpl39	1.6532e-98	1.65574	0.388	0.195	3.92123e-94				Inmt	1.73794e-200	-2.50825	0.036	0.222	4.12221e-196
Tyrobp	5.36755e-98	5.59168	0.145	0.005	1.27313e-93				Scd1	1.92905e-200	-2.75021	0.047	0.243	4.57552e-196
Rtp4	2.69816e-97	4.58242	0.152	0.009	6.39977e-93				Gm4450	5.83232e-200	-1.78628	0.124	0.382	1.38337e-195
Gm9844	7.30935e-97	5.08828	0.148	0.007	1.73371e-92				Hadh	6.19159e-200	-1.28909	0.216	0.521	1.46858e-195
Hprt	7.8333e-97	1.81916	0.333	0.145	1.85798e-92				Thnsl2	2.28473e-198	-1.28008	0.229	0.536	5.41914e-194
Frk	4.34256e-95	1.51012	0.374	0.177	1.03001e-90				Frem2	2.70448e-198	-2.06581	0.073	0.296	6.41477e-194
Nipal2	5.19503e-95	5.00392	0.144	0.006	1.23221e-90				Glb1	5.64624e-198	-1.03609	0.436	0.744	1.33923e-193
Cdkn1a	1.30212e-94	4.74752	0.146	0.007	3.0885e-90				AC140300.3	2.13397e-197	-4.26225	0.007	0.14	5.06157e-193
Itgb2l	2.25466e-94	2.74494	0.238	0.07	5.34783e-90				Ttc7	3.42853e-197	-1.18367	0.313	0.619	8.13212e-193
Ptma	6.35466e-94	1.09658	0.606	0.471	1.50726e-89				Ttc7b	1.04892e-196	-1.05339	0.399	0.708	2.48793e-192
Smad2	9.89052e-94	1.20791	0.54	0.39	2.34593e-89				Notum	1.49345e-196	-2.97741	0.022	0.185	3.54232e-192
Sema6a	2.41623e-93	1.2981	0.56	0.408	5.73105e-89				Gm36011	1.68578e-196	-2.63061	0.024	0.189	3.99851e-192
Eda	5.47884e-93	2.23205	0.252	0.078	1.29953e-88				Amacr	2.24202e-196	-1.58729	0.128	0.39	5.31786e-192
Ccl8	1.47213e-92	8.12012	0.13	0	3.49174e-88				Ascc1	8.09789e-193	-1.3143	0.228	0.527	1.92074e-188
Myh9	1.60245e-92	1.07255	0.616	0.496	3.80085e-88				Nhsl2	2.91553e-191	-1.04411	0.431	0.729	6.91534e-187
Rpl23	2.86943e-92	1.08396	0.594	0.45	6.806e-88				Ggnbp1	2.93605e-190	-1.90739	0.08	0.303	6.96402e-186
Syt14	1.16364e-91	1.0716	0.551	0.396	2.76005e-87				Kcnc2	7.87465e-190	-1.81764	0.117	0.363	1.86779e-185
Stxbp1	2.68431e-91	5.36597	0.138	0.005	6.36691e-87				Slc23a1	8.98441e-190	-1.15585	0.434	0.729	2.13101e-185
Gpr39	5.42758e-91	4.20134	0.148	0.011	1.28737e-86				Rnf212b	7.38301e-189	-4.52509	0.009	0.141	1.75118e-184
Fam49b	1.1988e-90	1.22121	0.489	0.32	2.84345e-86				Mettl7b	3.54131e-185	-1.22833	0.184	0.474	8.39963e-181
Tpm4	1.47054e-90	2.50017	0.226	0.062	3.48798e-86				Mccc2	1.63879e-183	-1.25192	0.225	0.515	3.88705e-179
Eif1a	1.6558e-90	1.87437	0.309	0.131	3.92739e-86				Lpl	1.18591e-182	-1.36314	0.173	0.447	2.81287e-178
Prickle2	3.07939e-90	3.18172	0.171	0.025	7.30402e-86				Sfxn5	2.41153e-182	-1.24065	0.278	0.569	5.71991e-178
Plekha2	3.29725e-90	1.86834	0.304	0.125	7.82074e-86				Sap30	4.55218e-180	-2.0892	0.052	0.244	1.07973e-175
Rps23	5.79516e-90	1.18475	0.55	0.401	1.37455e-85				C8a	5.59614e-180	-3.11007	0.028	0.187	1.32735e-175
Rps10	3.20576e-89	1.62268	0.398	0.224	7.60375e-85				Gm10800	1.52093e-179	-3.50452	0.005	0.124	3.60749e-175
Gfpt1	4.21714e-89	1.85882	0.356	0.182	1.00026e-84				Cela1	9.85664e-179	-1.78586	0.094	0.32	2.3379e-174
Ube2l6	5.2323e-89	5.55625	0.131	0.003	1.24105e-84				Anpep	2.20452e-178	-2.13233	0.048	0.235	5.2289e-174
9530082P21Rik	1.27711e-88	4.94187	0.138	0.007	3.02917e-84				Gys2	6.95051e-177	-3.88243	0.01	0.138	1.64859e-172
Sult1d1	1.44171e-88	1.19018	0.589	0.501	3.41959e-84				Slc39a5	9.26399e-176	-3.89372	0.009	0.135	2.19733e-171
Rps12-ps3	1.92474e-88	1.98213	0.303	0.128	4.56528e-84				Hexb	1.35238e-175	-1.23467	0.255	0.541	3.2077e-171
Tapbpl	4.37246e-88	2.47476	0.225	0.063	1.0371e-83				Tbc1d13	1.82545e-175	-1.1602	0.276	0.573	4.32979e-171
Runx1	1.04127e-87	5.25236	0.131	0.004	2.4698e-83				Retsat	6.76357e-175	-2.13532	0.048	0.232	1.60425e-170
Rpl18a	1.28056e-87	1.35656	0.447	0.275	3.03736e-83				Man2a1	3.38672e-174	-1.00408	0.41	0.706	8.03296e-170
Cep112	3.54162e-87	1.24369	0.406	0.213	8.40037e-83				B3galnt1	1.27037e-173	-3.02597	0.017	0.157	3.01319e-169
A230050P20Rik	1.47747e-86	3.04847	0.169	0.026	3.5044e-82				Ccdc107	2.73133e-173	-1.06179	0.304	0.609	6.47844e-169
Cacna2d3	2.29244e-86	1.83996	0.287	0.112	5.43743e-82				Ankrd65	3.16476e-173	-3.29121	0.014	0.147	7.50649e-169
Zfp810	4.25597e-86	1.00511	0.627	0.526	1.00947e-81				Fam107a	4.27834e-173	-3.38513	0.025	0.175	1.01478e-168
4930599N23Rik	4.84902e-86	2.89698	0.194	0.044	1.15014e-81				Mep1b	6.21479e-173	-2.64365	0.078	0.279	1.47409e-168
Sh2d4b	6.00056e-86	3.38995	0.19	0.042	1.42327e-81				Ppm1k	8.21932e-173	-1.75475	0.145	0.385	1.94954e-168
Rps14	7.85566e-86	1.3633	0.463	0.302	1.86328e-81				Abhd14b	1.53717e-172	-1.37875	0.18	0.446	3.64602e-168
Mcl1	8.89559e-86	1.37787	0.416	0.24	2.10994e-81				Nsdhl	3.08947e-172	-1.65811	0.121	0.357	7.32792e-168
Trp53inp1	9.14576e-86	1.47785	0.414	0.244	2.16928e-81				Bckdha	8.32705e-172	-1.17027	0.261	0.551	1.97509e-167
Tor3a	1.07471e-85	2.56205	0.21	0.054	2.5491e-81				Tmem116	1.30895e-171	-1.03886	0.402	0.69	3.10469e-167
Rps27rt	1.3605e-85	1.04638	0.601	0.473	3.22696e-81				Csad	8.27783e-171	-1.29259	0.276	0.556	1.96342e-166
Fcer1g	2.23315e-85	4.28529	0.143	0.012	5.29681e-81				Mogat1	2.73104e-170	-1.7446	0.113	0.34	6.47775e-166
Tagln2	3.41039e-85	1.81217	0.294	0.121	8.0891e-81				Etv5	3.33785e-170	-1.83224	0.098	0.318	7.91706e-166
Tshr	6.66543e-85	5.53719	0.142	0.013	1.58097e-80				Acss1	1.36476e-169	-1.94684	0.131	0.361	3.23708e-165
Anxa5	1.41171e-84	2.24556	0.239	0.077	3.34843e-80				Aadat	1.97489e-169	-1.94391	0.248	0.529	4.68424e-165
Rnf217	1.57292e-84	1.23487	0.49	0.331	3.7308e-80				Esrra	2.07805e-169	-1.13336	0.248	0.539	4.92894e-165
Rpl24	1.83504e-84	1.34971	0.454	0.29	4.35253e-80				Sema4g	1.82209e-168	-2.02057	0.054	0.24	4.32182e-164
Gm32857	4.40918e-84	3.23087	0.174	0.032	1.04581e-79				Zfp395	2.2279e-168	-1.4559	0.124	0.365	5.28435e-164
Ywhah	5.14356e-84	2.19711	0.245	0.083	1.22e-79				Cyp4a14	3.28816e-168	-1.06456	0.071	0.276	7.79919e-164
Ifi44	7.18042e-84	5.91437	0.123	0.002	1.70312e-79				Galm	6.8645e-168	-1.31082	0.246	0.523	1.62819e-163
Rpsa	9.46701e-84	1.08355	0.603	0.487	2.24548e-79				Gm13412	1.58528e-167	-3.77973	0.009	0.128	3.76012e-163
Gm35188	1.62229e-83	1.50829	0.468	0.322	3.84792e-79				Usp2	5.46709e-167	-1.09677	0.282	0.571	1.29674e-162
G3bp2	3.28149e-82	1.31718	0.445	0.285	7.78337e-78				Dpys	1.09909e-166	-5.09032	0.004	0.11	2.60694e-162
Mpeg1	3.30164e-82	6.42724	0.119	0.002	7.83117e-78				Gm31600	1.27925e-166	-3.63964	0.01	0.133	3.03426e-162
Alpk1	3.57826e-82	2.0496	0.25	0.087	8.48728e-78				Gm16004	5.51403e-166	-5.06949	0.004	0.11	1.30787e-161
Mvp	4.74048e-82	2.08941	0.237	0.077	1.1244e-77				Ccs	1.72555e-165	-1.07855	0.314	0.598	4.09283e-161
Selenow	4.9057e-82	2.3777	0.204	0.053	1.16358e-77				Dpf3	1.82183e-165	-1.06589	0.306	0.603	4.3212e-161
Nampt	1.02511e-81	1.0526	0.552	0.418	2.43146e-77				Susd3	1.00245e-164	-1.39416	0.151	0.4	2.37772e-160
Gm19684	4.28455e-81	8.10819	0.115	0	1.01625e-76				Tmem219	1.27513e-164	-1.35444	0.179	0.438	3.02449e-160
4930523C07Rik	7.65908e-81	4.54003	0.128	0.007	1.81666e-76				Gm2a	5.01405e-163	-1.22065	0.196	0.467	1.18928e-158
Ptpn14	8.4116e-81	2.4287	0.214	0.063	1.99515e-76				Gm12962	1.10799e-162	-2.68094	0.044	0.211	2.62803e-158
Spns2	1.31639e-80	1.72785	0.348	0.18	3.12234e-76				C1qtnf3	1.30016e-162	-2.4062	0.037	0.198	3.08384e-158
Zbed3	2.11812e-80	1.77049	0.349	0.185	5.02397e-76				Fam155a	1.70803e-161	-2.7687	0.017	0.151	4.05128e-157
Dnm3	3.03736e-80	2.39073	0.24	0.082	7.20431e-76				Bdh1	1.69347e-160	-2.24222	0.076	0.27	4.01673e-156
Wdr89	6.89228e-80	1.012	0.609	0.493	1.63478e-75				Btbd11	6.11553e-160	-1.91279	0.083	0.284	1.45054e-155
Hspb1	1.43211e-79	4.7038	0.13	0.009	3.39683e-75				Prom1	2.59858e-159	-1.09636	0.312	0.593	6.16358e-155
C130026I21Rik	2.46704e-79	2.74272	0.194	0.05	5.85157e-75				Nepn	3.21836e-159	-4.72106	0.004	0.106	7.63362e-155
Cep85	5.55856e-79	1.2825	0.67	0.635	1.31844e-74				AC166995.1	6.82131e-158	-2.37636	0.033	0.186	1.61795e-153
Iqgap1	7.16667e-79	1.25237	0.45	0.289	1.69986e-74				Lpin1	4.51833e-157	-1.24697	0.193	0.451	1.0717e-152
H2-M3	1.31196e-78	5.52235	0.118	0.003	3.11184e-74				Dcxr	4.96956e-157	-1.8306	0.071	0.263	1.17873e-152
Pomp	1.54834e-78	1.81284	0.3	0.137	3.67251e-74				Acmsd	1.1357e-156	-1.46366	0.131	0.367	2.69378e-152
Cds1	2.43419e-78	1.59724	0.323	0.156	5.77365e-74				Abcc9	2.11536e-156	-3.32871	0.015	0.141	5.01742e-152
Helz2	4.50833e-78	3.66249	0.133	0.012	1.06933e-73				Mccc1	8.81868e-156	-1.12109	0.25	0.525	2.0917e-151
Fbxl2	9.97987e-78	1.6766	0.316	0.152	2.36713e-73				Sbk1	1.84211e-155	-1.58459	0.107	0.323	4.36931e-151
Sdk1	1.87511e-77	3.13768	0.201	0.058	4.44758e-73				Cyp2j9	2.58751e-155	-1.05533	0.279	0.56	6.13731e-151
Tubb5	2.58331e-77	2.6265	0.195	0.052	6.12736e-73				Phtf2	4.5023e-154	-1.21091	0.228	0.491	1.0679e-149
Plk3	3.04576e-77	2.64518	0.186	0.045	7.22425e-73				Dclk3	8.66913e-154	-1.33484	0.141	0.376	2.05623e-149
Rasa4	3.07555e-77	4.27568	0.127	0.009	7.2949e-73				Gm28807	7.23908e-153	-2.62261	0.028	0.172	1.71704e-148
Sept11	5.12926e-77	1.11787	0.559	0.445	1.21661e-72				Slc5a4a	7.80349e-153	-2.24188	0.042	0.203	1.85091e-148
Ptpn22	5.17085e-77	3.05663	0.186	0.046	1.22648e-72				Abhd3	2.08696e-152	-1.35985	0.162	0.404	4.95006e-148
Wfdc2	5.58944e-77	1.93736	0.291	0.133	1.32576e-72				Hoxb3os	2.15881e-152	-1.16454	0.218	0.481	5.12048e-148
Fxyd5	9.33242e-77	5.18646	0.118	0.005	2.21356e-72				Dixdc1	5.93706e-152	-2.03223	0.055	0.228	1.40821e-147
Gm10076	1.14358e-76	2.4436	0.209	0.064	2.71247e-72				Wdr91	7.06557e-152	-1.21301	0.208	0.465	1.67588e-147
Mgst1	1.53069e-76	1.92454	0.256	0.098	3.63065e-72				Prickle1	3.65634e-151	-1.11824	0.24	0.505	8.67248e-147
Nnmt	2.18007e-76	7.60312	0.11	0.001	5.17091e-72				Tmem206	5.50071e-151	-1.74948	0.073	0.263	1.30471e-146
Crybg1	2.84075e-76	1.57029	0.308	0.142	6.73798e-72				Acad11	6.12677e-151	-1.06828	0.311	0.586	1.45321e-146
Heph	8.7151e-76	1.32631	0.435	0.278	2.06714e-71				R3hdml	5.04276e-150	-1.96829	0.03	0.177	1.19609e-145
Rpl11	1.38512e-75	1.3621	0.434	0.281	3.28536e-71				CT010465.1	2.70969e-149	-2.50575	0.028	0.169	6.42712e-145
Rps11	2.04296e-75	1.38497	0.418	0.262	4.84569e-71				Pbld2	3.21005e-149	-1.6245	0.095	0.3	7.61392e-145
Coro1a	4.94739e-75	6.29191	0.112	0.003	1.17347e-70				Slc37a4	1.02021e-148	-1.4608	0.109	0.322	2.41984e-144
Isg15	7.70461e-75	5.13601	0.115	0.004	1.82746e-70				Abcc6	1.27433e-148	-1.77871	0.068	0.251	3.02259e-144
Epsti1	9.38514e-75	4.72214	0.119	0.007	2.22606e-70				Acot13	1.14242e-147	-1.02015	0.265	0.54	2.7097e-143
Gm9951	2.3781e-74	2.22095	0.208	0.063	5.64061e-70				Srcin1	1.37157e-147	-1.04112	0.309	0.584	3.25322e-143
Etl4	3.12959e-74	1.20142	0.57	0.437	7.42308e-70				Ncam2	3.38494e-147	-2.00738	0.076	0.261	8.02874e-143
Gm45871	1.3534e-73	1.77228	0.282	0.125	3.21013e-69				Car4	1.02474e-143	-1.85457	0.078	0.263	2.43059e-139
Rpl10a	1.48031e-73	1.20181	0.473	0.327	3.51114e-69				Fn3k	5.75635e-143	-2.40012	0.031	0.173	1.36535e-138
Ifih1	3.36289e-73	1.80777	0.27	0.113	7.97644e-69				Lurap1l	6.95553e-143	-1.32429	0.151	0.379	1.64978e-138
Irf9	4.7771e-73	2.53401	0.178	0.044	1.13308e-68				Gtf2h2	3.47601e-142	-1.19479	0.207	0.456	8.24475e-138
Osmr	6.64428e-73	5.05405	0.112	0.004	1.57596e-68				Plscr4	6.55279e-142	-1.29473	0.197	0.439	1.55426e-137
Trim30d	1.03916e-72	4.174	0.123	0.01	2.46479e-68				Slc9a2	4.76016e-140	-1.33285	0.141	0.364	1.12906e-135
Tubb2a	1.50001e-72	2.7727	0.164	0.035	3.55788e-68				Paqr7	1.18229e-139	-2.06876	0.063	0.233	2.80426e-135
Twsg1	1.54173e-72	2.04609	0.239	0.09	3.65684e-68				L3hypdh	5.79454e-139	-1.50748	0.098	0.297	1.37441e-134
Stra6l	1.78235e-72	2.29594	0.206	0.065	4.22757e-68				Epb41l3	5.92039e-139	-1.63004	0.203	0.431	1.40426e-134
2310001H17Rik	2.8323e-72	1.56481	0.337	0.179	6.71794e-68				Aldh7a1	8.33519e-139	-1.08587	0.277	0.536	1.97702e-134
Tceal9	3.16736e-72	2.45496	0.192	0.055	7.51265e-68				Unc13c	8.37219e-139	-1.54519	0.153	0.372	1.9858e-134
C1qc	4.39946e-72	5.49681	0.11	0.004	1.04351e-67				Tkfc	8.59201e-139	-1.10962	0.193	0.441	2.03794e-134
Zcchc6	4.63843e-72	1.23876	0.438	0.294	1.10019e-67				Ech1	2.12093e-138	-1.14364	0.21	0.457	5.03064e-134
Rack1	1.03725e-71	1.18049	0.48	0.339	2.46026e-67				Hnf1aos1	1.41006e-137	-1.00834	0.529	0.747	3.34453e-133
Gm26804	1.68281e-71	1.17383	0.565	0.48	3.99146e-67				Dnajc19	2.15404e-137	-1.2352	0.232	0.476	5.10917e-133
Map3k14	1.88442e-71	1.18516	0.455	0.307	4.46965e-67				Ceacam1	1.73125e-136	-2.3295	0.03	0.166	4.10634e-132
Brip1	3.61047e-71	2.35164	0.185	0.05	8.56368e-67				Gpam	1.8854e-136	-1.38076	0.147	0.367	4.47197e-132
Birc2	4.34049e-71	1.26684	0.445	0.305	1.02952e-66				Gm16157	2.86462e-136	-3.21273	0.013	0.122	6.79459e-132
Rcbtb1	5.22167e-71	1.33488	0.411	0.26	1.23853e-66				Bckdhb	5.3297e-136	-1.13517	0.272	0.516	1.26415e-131
Aida	5.49482e-71	1.95784	0.239	0.091	1.30332e-66				Nxpe3	1.05123e-135	-1.49581	0.146	0.361	2.4934e-131
Rsad2	1.48958e-70	4.37718	0.112	0.006	3.53313e-66				Cxcl12	3.22768e-135	-2.14665	0.023	0.149	7.65573e-131
Tpst1	2.13139e-70	4.52351	0.116	0.008	5.05545e-66				Cyp4b1	2.39487e-134	-1.23567	0.524	0.696	5.6804e-130
Ctse	2.69992e-70	3.45875	0.134	0.018	6.40394e-66				Zfp101	1.83589e-133	-1.33201	0.144	0.362	4.35455e-129
1110038F14Rik	3.59462e-70	2.07709	0.214	0.072	8.52608e-66				Gm34777	1.96978e-133	-1.55004	0.087	0.274	4.67213e-129
Slc6a9	3.85333e-70	2.12759	0.201	0.061	9.13972e-66				Fam102a	3.83601e-133	-1.14988	0.18	0.413	9.09862e-129
Cep170	9.42321e-70	1.80538	0.264	0.114	2.23509e-65				Aamdc	1.38064e-132	-1.35263	0.126	0.336	3.27475e-128
Cryab	9.42643e-70	1.34752	0.385	0.228	2.23586e-65				Acox3	2.87973e-132	-1.10866	0.235	0.481	6.83044e-128
F3	1.31195e-69	2.05573	0.287	0.14	3.11181e-65				Gm10138	1.76977e-131	-1.5899	0.09	0.274	4.19772e-127
Mgp	2.75112e-69	2.73177	0.171	0.044	6.52538e-65				Lrrc19	2.11596e-131	-1.02399	0.25	0.503	5.01885e-127
Tlr3	3.53122e-69	2.89746	0.145	0.026	8.37569e-65				Dio1	1.70467e-130	-2.46876	0.021	0.14	4.04331e-126
Gm7480	7.6641e-69	2.64946	0.191	0.059	1.81785e-64				D3Ertd751e	2.82863e-130	-1.4502	0.106	0.302	6.70923e-126
Aif1	8.54789e-69	6.01857	0.104	0.003	2.02747e-64				Evc	3.00594e-130	-1.01494	0.268	0.525	7.1298e-126
Rpl14	1.12713e-68	1.07458	0.548	0.432	2.67343e-64				Slc6a4	1.07115e-129	-2.19495	0.027	0.156	2.54065e-125
Dynll1	1.26192e-68	1.93106	0.264	0.118	2.99315e-64				Acox2	1.60347e-129	-1.80212	0.164	0.373	3.80327e-125
Stk32c	1.6726e-68	4.14408	0.115	0.009	3.96723e-64				Gm41031	3.79462e-129	-2.92961	0.018	0.133	9.00046e-125
Plaur	3.44954e-68	4.56576	0.111	0.007	8.18196e-64				Scoc	2.55949e-128	-1.08658	0.194	0.427	6.07085e-124
Acot9	3.62768e-68	1.78394	0.261	0.113	8.6045e-64				Gm15883	3.73823e-128	-2.11298	0.044	0.188	8.8667e-124
Slc34a2	4.043e-68	5.69154	0.105	0.004	9.58958e-64				Pde6a	8.17933e-128	-3.3619	0.012	0.115	1.94005e-123
Ldhd	6.77083e-68	1.03636	0.575	0.486	1.60597e-63				Wfdc15b	3.1424e-126	-1.86875	0.034	0.169	7.45347e-122
Tgfbr2	9.15943e-68	1.12816	0.5	0.369	2.17252e-63				Gm40123	3.82301e-126	-1.57522	0.087	0.265	9.0678e-122
Rps16	9.67857e-68	1.12222	0.483	0.351	2.29566e-63				Abcd4	6.1082e-126	-1.39846	0.188	0.405	1.4488e-121
Gm37240	1.43186e-67	1.05618	0.534	0.428	3.39624e-63				Slc16a4	9.15436e-126	-1.09273	0.221	0.458	2.17132e-121
Dlgap4	1.75598e-67	1.71355	0.298	0.149	4.16501e-63				Fam228b	1.30563e-125	-2.33392	0.029	0.156	3.09683e-121
1700016C15Rik	1.84664e-67	1.02208	0.487	0.342	4.38005e-63				Asph	1.31684e-125	-1.01829	0.267	0.514	3.12342e-121
Pdgfb	3.15976e-67	1.90673	0.274	0.127	7.49464e-63				Gm44386	1.96184e-125	-1.98351	0.046	0.192	4.65328e-121
Steap1	3.18348e-67	2.85415	0.149	0.03	7.55089e-63				Vstm5	3.95044e-124	-1.32058	0.194	0.415	9.37005e-120
Rpl7	7.00677e-67	1.21205	0.473	0.339	1.66194e-62				Fgfr3	1.93311e-123	-1.34076	0.117	0.313	4.58515e-119
Fabp7	7.05257e-67	3.55362	0.125	0.016	1.6728e-62				Elmod3	4.70676e-123	-1.42961	0.111	0.302	1.1164e-118
Sema4b	9.68642e-67	1.38706	0.359	0.207	2.29752e-62				Uroc1	9.50723e-123	-2.72536	0.035	0.165	2.25502e-118
Cttnbp2nl	1.30073e-66	1.64136	0.29	0.141	3.0852e-62				Ccdc62	1.03e-122	-1.29407	0.124	0.325	2.44305e-118
Rasl11b	1.5916e-66	3.55896	0.128	0.018	3.77512e-62				Adra1a	7.06232e-122	-1.15553	0.279	0.512	1.67511e-117
Shtn1	2.53638e-66	1.23769	0.423	0.28	6.01605e-62				Gjb2	8.28534e-122	-1.54134	0.081	0.252	1.9652e-117
Nub1	4.84596e-66	1.2362	0.395	0.243	1.14941e-61				Pcbd1	8.29337e-122	-1.15479	0.14	0.348	1.9671e-117
Ifi27l2a	5.69181e-66	3.70291	0.119	0.013	1.35004e-61				Enpp1	1.62662e-121	-1.25266	0.101	0.289	3.85817e-117
Unc13b	6.59454e-66	2.03004	0.207	0.072	1.56416e-61				Acsl3	4.52663e-120	-1.88394	0.057	0.209	1.07367e-115
Tgm2	6.63097e-66	1.07863	0.495	0.363	1.5728e-61				Susd2	1.95258e-119	-2.16565	0.025	0.143	4.63132e-115
Jpt1	1.05552e-65	2.20425	0.195	0.063	2.50358e-61				Ciart	2.1684e-118	-3.14458	0.016	0.118	5.14323e-114
Rpl22	1.18216e-65	1.15442	0.464	0.326	2.80397e-61				Snhg11	9.47674e-118	-1.04077	0.496	0.693	2.24779e-113
Ly6c1	1.54093e-65	4.06449	0.111	0.009	3.65493e-61				Acp6	1.32228e-117	-1.11427	0.18	0.398	3.13631e-113
Trim34a	1.6624e-65	2.88301	0.136	0.023	3.94304e-61				Slc46a3	8.07104e-117	-1.67252	0.06	0.212	1.91437e-112
Pdlim7	1.75002e-65	3.35535	0.131	0.021	4.15087e-61				Grhpr	1.39613e-116	-1.1494	0.156	0.365	3.31148e-112
Rnf183	1.77974e-65	1.41934	0.308	0.154	4.22137e-61				Aspg	1.67459e-116	-1.62412	0.076	0.24	3.97196e-112
Gm44511	1.08174e-64	1.14391	0.489	0.384	2.56579e-60				Bmp7	1.05951e-115	-1.78725	0.053	0.197	2.51306e-111
Prrg4	1.55334e-64	2.06372	0.244	0.105	3.68438e-60				Idh2	1.12028e-115	-1.01643	0.205	0.433	2.6572e-111
Phactr1	1.5559e-64	1.27659	0.216	0.076	3.69043e-60				Atp8b4	1.9781e-115	-2.45308	0.043	0.176	4.69185e-111
Pdk4	2.70053e-64	2.65307	0.193	0.065	6.40538e-60				Gm3716	1.42964e-113	-2.09694	0.031	0.152	3.39096e-109
Gm26669	2.71373e-64	2.76006	0.169	0.047	6.4367e-60				Gm45645	8.37206e-113	-1.77693	0.048	0.186	1.98577e-108
Cxadr	2.7693e-64	1.41305	0.342	0.195	6.56851e-60				Pgm2	1.84426e-112	-1.03649	0.193	0.413	4.3744e-108
Apobec1	6.92644e-64	2.0614	0.216	0.082	1.64288e-59				Coq8a	3.61588e-112	-1.58803	0.07	0.226	8.5765e-108
Dtx4	8.60594e-64	2.65916	0.149	0.032	2.04124e-59				Cckar	4.51662e-112	-2.72063	0.014	0.111	1.0713e-107
Trim30a	9.32319e-64	2.54701	0.168	0.046	2.21137e-59				Unc5c	2.1511e-111	-1.22974	0.251	0.468	5.10221e-107
Kcnb1	1.2575e-63	2.95841	0.14	0.027	2.98266e-59				Gnpda1	6.59071e-110	-1.10785	0.164	0.37	1.56325e-105
Sesn3	1.80405e-63	1.15937	0.428	0.282	4.27902e-59				Slc5a12	9.60317e-110	-1.69422	0.316	0.49	2.27778e-105
Gm6034	6.40527e-63	3.54142	0.112	0.011	1.51927e-58				Hecw2	4.4233e-109	-1.90798	0.064	0.211	1.04916e-104
Efhd2	2.02449e-62	2.28817	0.186	0.06	4.80189e-58				Epas1	6.67666e-109	-1.36653	0.091	0.26	1.58364e-104
Ifit1	4.68848e-62	3.30393	0.102	0.006	1.11206e-57				Gm10271	1.50012e-108	-1.84685	0.047	0.181	3.55813e-104
Arntl	5.03906e-62	3.16043	0.133	0.025	1.19522e-57				C920021L13Rik	1.89403e-108	-1.31066	0.112	0.292	4.49244e-104
Eif6	7.17595e-62	1.74505	0.238	0.101	1.70206e-57				Qdpr	5.90186e-108	-1.12032	0.15	0.349	1.39986e-103
Tcirg1	2.09784e-61	1.74042	0.222	0.087	4.97586e-57				B430010I23Rik	1.40151e-107	-1.16767	0.136	0.325	3.32423e-103
Igf2bp2	2.2173e-61	1.16127	0.376	0.224	5.25922e-57				Hnf1a	2.30775e-107	-1.12779	0.145	0.341	5.47375e-103
Azin2	2.51979e-61	1.92027	0.249	0.114	5.97668e-57				0610006L08Rik	7.45624e-106	-1.33586	0.1	0.27	1.76855e-101
Grk5	6.74026e-61	1.74043	0.255	0.115	1.59872e-56				Apeh	1.36483e-105	-1.13538	0.137	0.328	3.23723e-101
Aoc1	8.30478e-61	1.47935	0.389	0.265	1.96981e-56				Slc18b1	1.33979e-104	-1.2429	0.117	0.294	3.17785e-100
Adar	1.27194e-60	1.30675	0.332	0.186	3.01691e-56				Tyw3	1.9645e-104	-1.82932	0.049	0.181	4.65961e-100
Junb	1.70006e-60	1.7037	0.233	0.098	4.03237e-56				Zfp503	2.44517e-104	-1.14937	0.204	0.408	5.7997e-100
Gm15336	2.48961e-60	2.44146	0.179	0.058	5.9051e-56				Lrrc8b	3.7965e-103	-1.01982	0.207	0.417	9.00492e-99
Rpl8	2.94108e-60	1.00721	0.539	0.436	6.97596e-56				Evpl	4.52893e-103	-1.55973	0.064	0.208	1.07422e-98
Eif2ak2	3.61998e-60	1.35336	0.337	0.194	8.58622e-56				Cry2	1.02445e-102	-1.01674	0.161	0.359	2.42988e-98
Gadd45g	4.02133e-60	2.15091	0.185	0.062	9.53818e-56				Gsta3	1.48155e-102	-1.12879	0.138	0.325	3.51408e-98
Calm1	1.76687e-59	1.11725	0.451	0.32	4.19085e-55				Zfp467	5.00922e-102	-1.22791	0.118	0.296	1.18814e-97
Ier3	9.61951e-59	3.06479	0.137	0.03	2.28165e-54				Slc29a3	3.72957e-101	-1.00275	0.169	0.37	8.84617e-97
Cmc4	2.33118e-58	1.86526	0.228	0.098	5.52934e-54				Fads2	1.07366e-100	-1.20554	0.123	0.301	2.5466e-96
Coro2b	2.64124e-58	3.22662	0.116	0.017	6.26475e-54				Gm37988	6.09654e-100	-1.37447	0.084	0.24	1.44604e-95
Btg2	3.28643e-58	2.72867	0.134	0.028	7.79508e-54				Sgpp1	1.54849e-99	-1.00777	0.189	0.393	3.67286e-95
Sh3bp2	5.73208e-58	1.8793	0.222	0.093	1.35959e-53				Vwa2	2.47615e-99	-1.74837	0.035	0.151	5.87317e-95
Rps3a1	9.79316e-58	1.29437	0.377	0.243	2.32284e-53				Gm10658	2.94648e-99	-1.48209	0.079	0.23	6.98876e-95
Rps3	3.55183e-57	1.02492	0.519	0.411	8.42459e-53				Gm7932	4.62963e-99	-1.10189	0.126	0.306	1.0981e-94
Pkm	5.50123e-57	2.07868	0.21	0.086	1.30484e-52				Akr1c14	1.09706e-98	-1.89285	0.038	0.156	2.60213e-94
Ptpn1	5.78066e-57	1.2081	0.406	0.278	1.37111e-52				Tmem25	1.56875e-98	-1.14485	0.121	0.297	3.72091e-94
Amn1	9.21304e-57	1.00686	0.463	0.337	2.18524e-52				Msrb2	4.8151e-98	-2.17169	0.024	0.127	1.14209e-93
Ptpn23	1.55803e-56	1.58024	0.277	0.143	3.69549e-52				Ror2	9.59902e-98	-2.28949	0.048	0.171	2.27679e-93
D030045P18Rik	1.68772e-56	4.33927	0.101	0.01	4.0031e-52				Csrnp3	1.65398e-97	-1.30431	0.101	0.263	3.92307e-93
Nupr1	3.84218e-56	3.10853	0.115	0.019	9.11326e-52				Kyat3	3.3156e-97	-1.3868	0.173	0.356	7.86428e-93
Fmnl3	4.22717e-56	3.60091	0.102	0.011	1.00264e-51				Dhfr	3.85125e-97	-1.09216	0.155	0.343	9.13477e-93
Gm7580	4.79921e-56	3.08239	0.13	0.029	1.13832e-51				Tmem241	8.29282e-97	-1.17994	0.154	0.338	1.96698e-92
Slc1a4	4.86496e-56	1.28626	0.32	0.181	1.15392e-51				Sms	1.13122e-96	-1.40187	0.074	0.22	2.68313e-92
Cfl1	6.53917e-56	1.3913	0.307	0.17	1.55103e-51				Gm36231	1.87278e-96	-1.95884	0.031	0.14	4.44205e-92
Ppip5k1	9.85757e-56	1.03097	0.469	0.353	2.33812e-51				Tst	1.90951e-96	-1.46482	0.069	0.211	4.52917e-92
Jam3	1.03519e-55	1.29621	0.332	0.189	2.45536e-51				Zfp385b	2.41774e-96	-1.47351	0.11	0.273	5.73463e-92
Cytip	1.18842e-55	2.55149	0.148	0.04	2.81881e-51				C2cd2l	2.11099e-95	-1.22715	0.119	0.288	5.00707e-91
Gm42917	1.37137e-55	3.18513	0.121	0.022	3.25275e-51				Glt1d1	2.16986e-94	-1.47106	0.103	0.261	5.14669e-90
Irf2bpl	2.21752e-55	2.02479	0.189	0.07	5.25975e-51				Cnnm4	4.77459e-94	-2.2387	0.019	0.112	1.13249e-89
Nrxn3	3.8022e-55	2.96584	0.167	0.055	9.01844e-51				Gm14320	5.63353e-94	-1.99728	0.032	0.139	1.33622e-89
Ywhag	5.03947e-55	1.33393	0.33	0.197	1.19531e-50				4930481A15Rik	8.81456e-94	-1.36369	0.081	0.229	2.09072e-89
Casp7	1.0179e-54	1.37041	0.296	0.161	2.41436e-50				Srd5a2	1.17281e-93	-1.6861	0.038	0.153	2.78179e-89
Rpl17	1.07305e-54	1.14335	0.456	0.344	2.54516e-50				Mtmr10	7.14769e-93	-1.02355	0.215	0.412	1.69536e-88
Cdk17	1.08717e-54	1.36346	0.318	0.184	2.57865e-50				Shmt2	1.86518e-92	-1.43899	0.076	0.219	4.42403e-88
Ppa1	1.12804e-54	1.86397	0.201	0.08	2.67561e-50				Ryr2	2.88055e-92	-2.05612	0.024	0.123	6.83238e-88
Fosl2	1.79102e-54	2.56246	0.149	0.042	4.24813e-50				Slc7a13	3.22166e-92	-1.89388	0.067	0.201	7.64145e-88
Mapkapk2	1.79582e-54	1.03635	0.462	0.343	4.25951e-50				Emx1	7.47752e-92	-1.54607	0.057	0.185	1.77359e-87
Skil	5.06204e-54	1.40277	0.297	0.164	1.20066e-49				Slc5a8	8.76216e-92	-1.04336	0.299	0.494	2.0783e-87
Tmco4	5.63156e-54	1.29523	0.306	0.17	1.33575e-49				Pgpep1l	4.00424e-91	-2.37528	0.021	0.113	9.49765e-87
Arpc5	6.10076e-54	1.30398	0.343	0.212	1.44704e-49				Kif5a	2.62819e-90	-2.22436	0.02	0.11	6.2338e-86
Gm42620	1.34657e-53	2.51868	0.164	0.055	3.19393e-49				Cgref1	9.5769e-90	-1.13991	0.133	0.305	2.27155e-85
Ugt2b37	1.47679e-53	3.1273	0.129	0.029	3.50279e-49				Mum1	1.3512e-89	-1.30965	0.1	0.253	3.20491e-85
4833422C13Rik	2.16623e-53	1.8795	0.2	0.08	5.13808e-49				Slc5a6	8.63862e-89	-2.11579	0.023	0.117	2.04899e-84
Egfros	4.21684e-53	2.33966	0.185	0.072	1.00019e-48				Smim24	2.21698e-88	-1.43588	0.058	0.185	5.25845e-84
Tnfaip8l3	1.14868e-52	2.97061	0.111	0.018	2.72454e-48				Slc25a16	5.23558e-88	-1.03919	0.148	0.323	1.24183e-83
Slc31a2	1.15691e-52	2.29848	0.154	0.047	2.74406e-48				Gpm6a	5.26946e-88	-1.04659	0.499	0.682	1.24986e-83
Sh3bp4	1.2065e-52	2.00435	0.19	0.074	2.8617e-48				Catspere2	2.36397e-87	-1.35595	0.108	0.262	5.60711e-83
Rcn1	1.40368e-52	2.60849	0.147	0.043	3.32938e-48				Tmem120a	4.60576e-87	-1.20925	0.094	0.244	1.09244e-82
Nup210	1.67814e-52	1.54018	0.28	0.154	3.98038e-48				Ces2c	4.70166e-87	-1.15823	0.102	0.257	1.11519e-82
Timd2	1.71264e-52	1.23217	0.36	0.225	4.06222e-48				Frs3	1.04415e-86	-1.62976	0.042	0.155	2.47661e-82
Lacc1	2.0717e-52	2.02309	0.173	0.061	4.91387e-48				St6galnac3	1.59923e-86	-2.16178	0.035	0.139	3.79322e-82
Psma1	2.60212e-52	1.10498	0.401	0.273	6.17196e-48				Dgka	4.7458e-86	-1.22568	0.083	0.225	1.12566e-81
Glrx	2.86398e-52	1.61314	0.228	0.104	6.79308e-48				Vnn1	1.9969e-85	-1.07706	0.143	0.312	4.73645e-81
Phf6	4.4087e-52	1.61667	0.25	0.125	1.0457e-47				3632451O06Rik	2.08759e-84	-1.21962	0.103	0.254	4.95155e-80
Cyp2j13	4.99998e-52	1.05434	0.544	0.451	1.18595e-47				Olfml1	3.72546e-82	-1.46715	0.051	0.167	8.83643e-78
Arpc1b	1.41927e-51	1.89286	0.201	0.084	3.36637e-47				Hebp1	3.79908e-82	-1.20614	0.086	0.226	9.01104e-78
Ankrd29	1.4746e-51	1.20736	0.308	0.173	3.4976e-47				Lhx1	7.37736e-82	-1.26171	0.085	0.224	1.74984e-77
Pim1	1.57221e-51	2.48801	0.123	0.027	3.72913e-47				Ubiad1	1.55121e-81	-1.45734	0.072	0.2	3.67932e-77
Ppp4r4	2.18816e-51	1.82008	0.211	0.092	5.19009e-47				Tbc1d16	3.47608e-81	-1.11668	0.121	0.276	8.24491e-77
Zmynd15	5.00737e-51	1.71684	0.182	0.067	1.1877e-46				Pxylp1	4.98586e-81	-1.31109	0.084	0.221	1.1826e-76
Coro1c	6.06385e-51	1.22054	0.375	0.252	1.43828e-46				Ctnnbip1	5.2369e-81	-1.00899	0.131	0.292	1.24214e-76
Cacnb4	7.55986e-51	2.26997	0.187	0.075	1.79312e-46				Gprin3	7.16578e-81	-1.95412	0.028	0.122	1.69965e-76
Fam129a	1.06183e-50	2.87548	0.115	0.023	2.51855e-46				Adgra2	5.63624e-80	-1.81997	0.041	0.146	1.33686e-75
Setd7	1.08132e-50	1.87448	0.164	0.055	2.56478e-46				Fitm1	6.15522e-80	-2.21553	0.019	0.101	1.45996e-75
Fam163a	2.20534e-50	1.02963	0.419	0.281	5.23085e-46				Zbtb7c	6.31344e-80	-1.90301	0.048	0.157	1.49748e-75
Ano9	2.48981e-50	2.42141	0.143	0.042	5.90558e-46				Mrnip	1.28664e-78	-1.42823	0.068	0.192	3.05177e-74
Stk39	3.28895e-50	1.91306	0.194	0.08	7.80105e-46				Miga2	8.82952e-78	-1.28419	0.089	0.224	2.09427e-73
Myl12a	3.2891e-50	1.79219	0.231	0.113	7.80141e-46				Slc6a19	1.88827e-77	-1.03433	0.369	0.543	4.47879e-73
Pmepa1	4.48896e-50	1.8697	0.228	0.11	1.06474e-45				Idi1	4.2647e-77	-1.64717	0.032	0.127	1.01154e-72
Gm40271	5.05716e-50	1.97787	0.187	0.076	1.19951e-45				Glod5	2.15275e-76	-1.1859	0.08	0.212	5.10611e-72
Mthfd1l	5.3238e-50	1.29603	0.242	0.114	1.26275e-45				Lonrf1	2.28371e-76	-1.18923	0.102	0.244	5.41672e-72
Cldn1	5.63741e-50	2.66421	0.149	0.047	1.33714e-45				mt-Nd6	2.84382e-76	-1.52935	0.043	0.148	6.74526e-72
Jak2	1.61416e-49	1.08659	0.435	0.321	3.82862e-45				Halr1	2.80574e-75	-1.78724	0.039	0.139	6.65494e-71
Defb1	2.90484e-49	1.45796	0.26	0.136	6.89e-45				Gm34590	1.10065e-74	-1.95263	0.027	0.115	2.61064e-70
Cmpk2	3.56241e-49	2.76986	0.115	0.025	8.44968e-45				Elovl2	1.38495e-74	-1.65262	0.033	0.127	3.28497e-70
Gm31224	3.563e-49	1.91479	0.219	0.105	8.45108e-45				Ttc38	2.03207e-74	-1.03115	0.137	0.292	4.81986e-70
Rras	5.45203e-49	2.91845	0.106	0.019	1.29317e-44				Acot11	6.77406e-74	-1.22749	0.109	0.249	1.60674e-69
Mt2	9.96057e-49	1.91478	0.143	0.042	2.36255e-44				Cct6b	1.53089e-72	-1.72563	0.032	0.123	3.63112e-68
Gm44686	1.03046e-48	1.51803	0.298	0.181	2.44415e-44				Fzd1	4.11475e-71	-1.42198	0.041	0.141	9.75978e-67
Slc13a1	1.06776e-48	1.04182	0.849	0.909	2.53262e-44				Acat2	4.28206e-71	-1.00124	0.104	0.243	1.01566e-66
Prrg1	1.41751e-48	2.13279	0.156	0.052	3.3622e-44				Fndc9	2.30932e-70	-1.51513	0.04	0.136	5.47748e-66
B4galt5	3.05807e-48	1.02493	0.475	0.372	7.25345e-44				Abhd14a	7.40733e-70	-1.23365	0.068	0.186	1.75694e-65
Cd24a	4.33582e-48	2.56064	0.128	0.034	1.02841e-43				Tmem163	6.75664e-69	-1.9668	0.034	0.123	1.60261e-64
Znfx1	8.74463e-48	1.00118	0.394	0.268	2.07414e-43				Gcsh	1.5952e-68	-1.12925	0.078	0.201	3.78365e-64
Trib1	2.10345e-47	2.41016	0.127	0.033	4.98918e-43				Fmo4	4.28222e-68	-1.08089	0.1	0.232	1.0157e-63
Raph1	2.63459e-47	1.40661	0.305	0.186	6.24898e-43				Mettl24	4.47085e-68	-1.02754	0.168	0.323	1.06044e-63
Erbb4	2.94936e-47	2.35377	0.226	0.111	6.99558e-43				Gm48099	6.64589e-68	-1.7321	0.042	0.137	1.57634e-63
Doc2g	3.97105e-47	2.28478	0.127	0.034	9.41892e-43				Gm45051	7.09383e-68	-1.72234	0.033	0.122	1.68258e-63
Dusp1	6.19443e-47	1.72158	0.171	0.063	1.46926e-42				Polr3gl	1.65657e-67	-1.00307	0.106	0.24	3.92923e-63
Car5b	1.01394e-46	1.50782	0.254	0.136	2.40496e-42				Bco2	1.86703e-67	-1.81622	0.027	0.109	4.42842e-63
Sema5a	1.48916e-46	1.12058	0.617	0.613	3.53213e-42				Gabrb3	3.27535e-67	-1.76516	0.148	0.281	7.7688e-63
Cftr	2.10778e-46	1.28873	0.318	0.196	4.99945e-42				Gm15217	8.77646e-67	-1.42491	0.051	0.153	2.08169e-62
Gm47371	3.51489e-46	2.31774	0.141	0.045	8.33696e-42				Rab11fip4	1.51393e-66	-1.23232	0.051	0.154	3.59089e-62
H2afz	4.45661e-46	1.5266	0.279	0.164	1.05706e-41				Prima1	1.87901e-66	-1.68295	0.049	0.148	4.45682e-62
Fga	4.54799e-46	2.6652	0.145	0.048	1.07874e-41				Chst3	2.89262e-66	-2.05971	0.028	0.11	6.86101e-62
Wars	5.36538e-46	1.91561	0.19	0.083	1.27262e-41				Rilpl2	4.17764e-66	-1.09447	0.095	0.222	9.90895e-62
Jund	2.56259e-45	1.05377	0.407	0.298	6.07821e-41				Chrm3	7.12162e-66	-1.25728	0.179	0.321	1.68918e-61
Syt12	3.48496e-45	1.81585	0.164	0.061	8.26598e-41				AC117197.3	2.11187e-65	-1.92384	0.028	0.109	5.00913e-61
Trim56	4.21976e-45	1.31084	0.262	0.141	1.00088e-40				Klhdc7a	3.39416e-65	-1.05572	0.089	0.214	8.0506e-61
Bcam	1.31501e-44	2.54343	0.107	0.024	3.11907e-40				Alad	1.72662e-64	-1.02623	0.1	0.229	4.09537e-60
Ccng1	1.70183e-44	1.18619	0.326	0.207	4.03658e-40				Pag1	2.39342e-64	-1.36108	0.066	0.175	5.67695e-60
Tgif1	2.95275e-44	1.81781	0.196	0.089	7.00362e-40				Zmynd12	5.97799e-64	-1.05581	0.115	0.249	1.41792e-59
Rhbdf2	3.31188e-44	1.34862	0.264	0.147	7.85544e-40				Gjb1	1.31657e-63	-1.80279	0.032	0.115	3.12276e-59
F2rl1	6.19163e-44	2.53914	0.106	0.024	1.46859e-39				Frg2f1	3.46655e-62	-1.67397	0.034	0.118	8.2223e-58
Bak1	6.96469e-44	2.28175	0.129	0.039	1.65196e-39				Gm10681	8.2416e-62	-1.19234	0.06	0.165	1.95482e-57
Polr3e	8.1133e-44	1.54863	0.464	0.412	1.92439e-39				Fbxo40	3.40063e-61	-1.17477	0.072	0.182	8.06594e-57
Zwint	2.10471e-43	1.03713	0.418	0.318	4.99217e-39				Iffo1	8.47855e-61	-1.12853	0.114	0.241	2.01103e-56
4930405A10Rik	2.66387e-43	2.48936	0.136	0.045	6.31844e-39				Prag1	1.19148e-58	-1.01366	0.129	0.26	2.82608e-54
Rnf135	3.84925e-43	1.19172	0.284	0.165	9.13003e-39				Ace	1.51082e-58	-1.25061	0.054	0.15	3.58352e-54
Mrpl33	4.48965e-43	1.17057	0.326	0.211	1.0649e-38				Gm27216	1.88406e-58	-1.11992	0.068	0.173	4.4688e-54
Gm15738	5.78659e-43	1.67002	0.217	0.11	1.37252e-38				Gm12678	3.375e-58	-1.38278	0.063	0.163	8.00516e-54
Plin2	5.79918e-43	1.17102	0.41	0.312	1.37551e-38				4921539H07Rik	3.46194e-58	-1.02897	0.242	0.387	8.21138e-54
Npas2	7.39046e-43	2.08674	0.133	0.042	1.75294e-38				Hemk1	5.11879e-58	-1.25781	0.047	0.139	1.21413e-53
Anxa4	7.8914e-43	1.06525	0.347	0.23	1.87176e-38				Epha1	1.39884e-57	-1.21513	0.059	0.158	3.31792e-53
Tes	1.51618e-42	1.81404	0.156	0.059	3.59624e-38				Sc5d	5.89199e-57	-1.14207	0.068	0.172	1.39752e-52
Sparc	1.94843e-42	2.74248	0.104	0.024	4.62148e-38				Fdft1	1.99696e-56	-1.26252	0.066	0.167	4.73658e-52
Nckap5	2.67704e-42	1.05669	0.283	0.163	6.34967e-38				Degs2	2.91003e-56	-1.64039	0.027	0.101	6.9023e-52
Slco2a1	5.51834e-42	1.03544	0.389	0.274	1.30889e-37				Ggct	5.92226e-56	-1.12317	0.072	0.176	1.4047e-51
Pgd	8.66061e-42	1.25322	0.283	0.169	2.05421e-37				Sardhos	1.45062e-55	-1.34342	0.035	0.115	3.44072e-51
Map3k21	1.39952e-41	1.5991	0.207	0.102	3.31951e-37				Ppic	1.55412e-55	-1.04728	0.072	0.178	3.68621e-51
Lhfpl2	1.58649e-41	2.33987	0.128	0.041	3.763e-37				Cyp2f2	5.22962e-55	-1.32304	0.043	0.128	1.24041e-50
Syne1	1.62184e-41	2.12268	0.158	0.063	3.84685e-37				Aldh5a1	6.02585e-55	-1.08888	0.079	0.186	1.42927e-50
Rab31	1.66087e-41	2.07183	0.127	0.039	3.93943e-37				AC110166.2	8.89315e-54	-1.4055	0.042	0.125	2.10937e-49
Jpt2	2.13923e-41	2.23561	0.122	0.036	5.07403e-37				Nr1d1	5.13489e-53	-1.3606	0.051	0.14	1.21795e-48
Gm11361	3.001e-41	1.11629	0.358	0.25	7.11807e-37				Cyp2d9	1.92029e-52	-1.06003	0.052	0.141	4.55473e-48
Nras	4.11347e-41	1.31742	0.26	0.148	9.75673e-37				Acad12	2.14876e-52	-1.02311	0.095	0.206	5.09664e-48
Slc40a1	4.50854e-41	1.30206	0.264	0.152	1.06938e-36				Tmem143	1.34476e-51	-1.09189	0.066	0.163	3.18963e-47
4930486I03Rik	4.76403e-41	1.30122	0.335	0.231	1.12998e-36				Nid2	2.35156e-51	-1.03788	0.066	0.163	5.57766e-47
Peli1	9.94652e-41	1.07677	0.413	0.314	2.35922e-36				Afap1l1	1.72871e-50	-1.23368	0.043	0.125	4.10032e-46
Adap1	1.0416e-40	1.35036	0.242	0.132	2.47056e-36				Msmo1	5.3654e-50	-1.2189	0.064	0.156	1.27262e-45
Akr1b3	1.2871e-40	1.85091	0.189	0.09	3.05288e-36				Tet1	5.57905e-50	-1.52591	0.038	0.113	1.32329e-45
Spns3	1.32007e-40	1.60431	0.17	0.072	3.13107e-36				Gm19461	5.76153e-50	-1.24476	0.047	0.13	1.36658e-45
Smagp	2.12925e-40	1.20038	0.309	0.199	5.05036e-36				Cpne4	1.40622e-49	-1.6859	0.083	0.182	3.33542e-45
Amotl2	2.98836e-40	1.50499	0.266	0.162	7.08809e-36				Pkd2l2	3.48157e-48	-1.10299	0.062	0.153	8.25793e-44
Tnfrsf1a	4.10963e-40	1.6291	0.177	0.078	9.74764e-36				Zmynd10	4.32338e-48	-1.4705	0.031	0.101	1.02546e-43
Capns1	9.80218e-40	1.15318	0.337	0.232	2.32498e-35				Adgrl1	1.50191e-47	-1.15531	0.053	0.138	3.56239e-43
St3gal4	1.095e-39	1.56369	0.163	0.066	2.59724e-35				Iyd	4.02265e-47	-1.16321	0.051	0.133	9.54133e-43
Vps37d	1.44851e-39	2.04856	0.136	0.048	3.43573e-35				Cyp2j8	5.23711e-46	-1.18086	0.05	0.131	1.24219e-41
Trim26	1.89564e-39	1.23526	0.282	0.173	4.49627e-35				Ccdc162	3.66026e-45	-1.14485	0.11	0.215	8.68177e-41
Gtpbp2	2.39663e-39	1.16148	0.33	0.223	5.68456e-35				Mfsd2a	3.80536e-45	-1.5788	0.036	0.106	9.02594e-41
Spag6l	2.58838e-39	1.12436	0.303	0.191	6.13938e-35				Anks1b	4.59196e-45	-1.13126	0.117	0.223	1.08917e-40
Srxn1	2.72371e-39	1.81661	0.156	0.062	6.46038e-35				Mro	1.57125e-44	-1.08811	0.077	0.17	3.72685e-40
Arhgef5	5.79276e-39	1.09721	0.34	0.235	1.37399e-34				Slc25a25	2.95223e-44	-1.01663	0.125	0.234	7.00239e-40
Ucp2	8.72724e-39	1.93635	0.154	0.063	2.07001e-34				Btc	3.76493e-44	-1.51001	0.035	0.103	8.93005e-40
St14	2.99229e-38	2.03336	0.135	0.049	7.09742e-34				Als2cr12	1.05973e-43	-1.29551	0.056	0.137	2.51357e-39
Hus1	4.34557e-38	1.10499	0.341	0.237	1.03073e-33				Hmgcr	8.12035e-43	-1.41238	0.104	0.204	1.92607e-38
Ncam1	5.26113e-38	1.87055	0.151	0.061	1.24789e-33				Slc25a34	8.27802e-43	-1.29287	0.041	0.112	1.96346e-38
Tmem37	1.44435e-37	1.01258	0.381	0.28	3.42586e-33				Phlda2	1.17076e-42	-1.20537	0.042	0.115	2.77692e-38
Rps26	1.64071e-37	1.0558	0.344	0.239	3.8916e-33				Gm19951	1.52642e-42	-1.41739	0.039	0.109	3.62053e-38
Tenm3	2.41184e-37	1.97918	0.164	0.073	5.72064e-33				D10Jhu81e	4.03123e-42	-1.01319	0.055	0.135	9.56167e-38
Rps6	4.1593e-37	1.31625	0.271	0.167	9.86545e-33				Mdk	7.06291e-42	-1.05525	0.054	0.133	1.67525e-37
Acsl5	1.00521e-36	1.35118	0.23	0.128	2.38426e-32				Rgs12	9.61365e-42	-1.04302	0.062	0.145	2.28026e-37
Pid1	1.05588e-36	2.13073	0.127	0.045	2.50444e-32				Gm15879	1.01349e-41	-1.00142	0.061	0.143	2.4039e-37
Tmem165	1.2083e-36	1.24035	0.265	0.161	2.86597e-32				Gm43948	1.99336e-41	-1.10071	0.063	0.146	4.72805e-37
Tuba1b	1.36374e-36	1.92813	0.145	0.059	3.23464e-32				Gm32063	2.32874e-41	-1.22971	0.041	0.112	5.52354e-37
Rela	2.21789e-36	1.53849	0.189	0.094	5.26062e-32				Ceacam2	2.38474e-41	-1.06934	0.061	0.143	5.65635e-37
Rhoc	3.81943e-36	1.72635	0.155	0.066	9.05931e-32				Podn	2.59037e-41	-1.00864	0.072	0.159	6.14409e-37
Ogfr	1.26858e-35	2.04562	0.123	0.043	3.00895e-31				Endou	7.47272e-41	-1.072	0.049	0.124	1.77246e-36
Gm48678	1.28795e-35	1.20614	0.315	0.219	3.05488e-31				Gm15343	1.33908e-39	-1.02822	0.056	0.133	3.17615e-35
Gadd45a	3.18795e-35	2.24079	0.109	0.034	7.5615e-31				Gm29571	1.87582e-39	-1.40627	0.036	0.101	4.44926e-35
Sqle	3.26144e-35	1.19223	0.288	0.188	7.7358e-31				Ahcy	5.96721e-39	-1.19366	0.038	0.104	1.41536e-34
Atg16l2	3.45627e-35	1.66734	0.155	0.067	8.19792e-31				Pantr1	1.36653e-38	-1.2351	0.041	0.109	3.24127e-34
Sox4	3.81774e-35	2.58284	0.101	0.029	9.0553e-31				Ctsf	4.2953e-38	-1.06677	0.046	0.116	1.0188e-33
Flot1	4.16676e-35	1.44491	0.176	0.083	9.88314e-31				A730049H05Rik	2.00819e-37	-1.11094	0.051	0.123	4.76323e-33
Rfx5	9.64416e-35	1.71075	0.149	0.063	2.2875e-30				Calb1	1.33744e-36	-1.05838	0.052	0.125	3.17228e-32
Gnai2	1.0153e-34	1.02452	0.345	0.248	2.40819e-30				Gm29536	1.688e-36	-1.14959	0.067	0.144	4.00376e-32
Rell1	1.1378e-34	1.42399	0.209	0.114	2.69876e-30				Rtn4rl1	3.18517e-36	-1.02456	0.083	0.168	7.55491e-32
Rnf114	1.42979e-34	1.01311	0.343	0.243	3.39131e-30				Slc26a2	3.32528e-36	-1.15606	0.04	0.104	7.88722e-32
Slc20a1	3.53779e-34	1.11047	0.344	0.248	8.39128e-30				Shpk	1.06668e-35	-1.06521	0.054	0.125	2.53005e-31
Gm8739	6.83717e-34	1.94331	0.117	0.04	1.62171e-29				Rfng	4.87448e-35	-1.00829	0.057	0.13	1.15618e-30
Casz1	1.08399e-33	1.23685	0.216	0.118	2.57112e-29				Txndc16	5.02057e-35	-1.0028	0.059	0.133	1.19083e-30
9030025P20Rik	2.54047e-33	1.92954	0.142	0.061	6.02575e-29				Slc7a12	5.55226e-32	-1.33484	0.142	0.231	1.31694e-27
Dbnl	3.8572e-33	1.37629	0.212	0.119	9.14888e-29				Poli	7.0445e-32	-1.03725	0.048	0.111	1.67088e-27
Psma5	6.98473e-33	1.09692	0.285	0.187	1.65671e-28				Efna1	1.54374e-31	-1.01813	0.059	0.128	3.6616e-27
Phldb1	9.53052e-33	1.27076	0.286	0.195	2.26054e-28				Gm47771	2.58085e-31	-1.00293	0.052	0.117	6.12152e-27
Btg3	1.26481e-32	1.5578	0.151	0.067	3.00001e-28				Rarb	3.38475e-31	-1.36457	0.054	0.119	8.02829e-27
Slc25a28	1.53327e-32	1.15004	0.264	0.166	3.63676e-28				A930033H14Rik	7.80956e-30	-1.01296	0.053	0.116	1.85235e-25
Npdc1	3.17575e-32	1.63327	0.152	0.069	7.53257e-28				Eva1c	1.91127e-24	-1.3923	0.087	0.152	4.53335e-20
2200002D01Rik	3.3941e-32	2.17032	0.103	0.033	8.05047e-28				Rnf24	2.66573e-22	-2.5756	0.346	0.41	6.32284e-18
Gm26827	3.96402e-32	1.98483	0.143	0.063	9.40226e-28
Kcnq1	4.11359e-32	1.14558	0.319	0.232	9.75701e-28
Lrriq1	4.2588e-32	1.55086	0.139	0.058	1.01014e-27
Angptl4	6.94631e-32	1.51121	0.163	0.078	1.6476e-27
Abracl	1.15551e-31	1.47369	0.207	0.118	2.74076e-27
Plekho1	1.46508e-31	2.09856	0.102	0.033	3.47502e-27
Psma7	3.6211e-31	1.11804	0.286	0.193	8.58889e-27
Hdc	4.28015e-31	2.1086	0.161	0.08	1.01521e-26
AC166344.1	4.53641e-31	2.03439	0.111	0.04	1.07599e-26
Tiam2	5.05529e-31	1.42333	0.169	0.084	1.19906e-26
Pvr	5.12035e-31	1.64705	0.132	0.055	1.2145e-26
Fam241a	5.1752e-31	1.94549	0.108	0.037	1.2275e-26
Nedd8	5.20227e-31	1.0591	0.34	0.251	1.23393e-26
Rpl37	6.43366e-31	1.09197	0.297	0.205	1.526e-26
Nek6	7.54472e-31	1.22985	0.243	0.151	1.78953e-26
Ftl1-ps1	8.09939e-31	1.31899	0.283	0.197	1.92109e-26
Tbrg1	1.55365e-30	1.30866	0.176	0.09	3.6851e-26
Tmem184b	2.16046e-30	1.48644	0.147	0.067	5.1244e-26
Slc35f5	2.35995e-30	1.0679	0.281	0.187	5.59757e-26
Hmgb3	2.41199e-30	1.55041	0.158	0.076	5.721e-26
Creb3	2.47468e-30	1.60819	0.156	0.075	5.86969e-26
Arl4a	4.9483e-30	1.57604	0.146	0.068	1.17369e-25
Eef1b2	1.42857e-29	1.26323	0.213	0.125	3.38843e-25
Vars	1.4938e-29	1.47253	0.15	0.071	3.54315e-25
Gm39469	1.50941e-29	1.18659	0.255	0.165	3.58017e-25
Triobp	1.69862e-29	1.57668	0.146	0.068	4.02896e-25
Kars	1.76829e-29	1.54065	0.154	0.075	4.19421e-25
Zyx	1.90249e-29	1.47082	0.196	0.112	4.51253e-25
Gm12002	2.52574e-29	1.94223	0.144	0.068	5.9908e-25
Socs2	3.34083e-29	1.0278	0.368	0.286	7.92413e-25
Micall1	7.89136e-29	1.18816	0.205	0.118	1.87175e-24
Gm8126	9.92822e-29	2.05449	0.137	0.064	2.35487e-24
Pea15a	1.01536e-28	2.00722	0.113	0.045	2.40832e-24
Usp43	2.0571e-28	1.67124	0.138	0.064	4.87923e-24
Inpp1	1.16701e-27	1.34486	0.177	0.096	2.76803e-23
Hsd11b1	1.17564e-27	1.76674	0.148	0.074	2.78851e-23
Pld2	1.30907e-27	1.94671	0.104	0.039	3.10498e-23
Per1	1.43601e-27	1.20706	0.188	0.104	3.40608e-23
4930533B01Rik	2.58847e-27	1.95465	0.121	0.052	6.1396e-23
Plec	4.86427e-27	1.11281	0.263	0.178	1.15376e-22
Gm9493	4.91537e-27	1.27828	0.197	0.116	1.16588e-22
E130307A14Rik	5.20194e-27	1.01806	0.258	0.17	1.23385e-22
Maea	6.20563e-27	1.01234	0.295	0.211	1.47191e-22
Noct	6.46212e-27	1.73275	0.162	0.086	1.53275e-22
Gm47167	8.259e-27	1.60886	0.167	0.092	1.95895e-22
Morf4l2	1.03381e-26	1.14739	0.228	0.144	2.45209e-22
Tbl3	1.04253e-26	1.54985	0.139	0.066	2.47277e-22
Apaf1	1.15279e-26	1.22831	0.211	0.128	2.73431e-22
Gm15614	1.27236e-26	1.33997	0.242	0.163	3.01791e-22
Krt8	1.79585e-26	1.30166	0.19	0.11	4.25958e-22
Tcaf1	1.85615e-26	1.41906	0.159	0.082	4.4026e-22
Zmat3	3.17046e-26	1.15053	0.219	0.136	7.52001e-22
Aen	3.98336e-26	1.51198	0.146	0.073	9.44813e-22
Vasp	4.175e-26	1.451	0.16	0.085	9.90267e-22
Zbtb18	5.15322e-26	1.30677	0.177	0.099	1.22229e-21
Cd82	5.80319e-26	1.26536	0.208	0.127	1.37646e-21
Nav3	5.88355e-26	2.3264	0.103	0.041	1.39552e-21
6530409C15Rik	5.97944e-26	1.69256	0.137	0.067	1.41826e-21
G6pdx	7.49659e-26	1.66501	0.13	0.061	1.77812e-21
Traf3ip2	1.18319e-25	1.35372	0.163	0.088	2.80641e-21
Cyr61	2.02448e-25	1.08355	0.157	0.081	4.80187e-21
Npc2	3.92867e-25	1.06789	0.278	0.196	9.3184e-21
Ilk	3.94528e-25	1.26109	0.183	0.105	9.35781e-21
Prr13	5.35243e-25	1.24418	0.191	0.113	1.26954e-20
Fsd1l	9.69543e-25	1.69745	0.109	0.046	2.29966e-20
Gm8186	1.22195e-24	1.47571	0.139	0.07	2.89835e-20
Gt(ROSA)26Sor	1.69025e-24	1.30413	0.186	0.11	4.00911e-20
Usp31	2.15813e-24	1.09787	0.214	0.135	5.11886e-20
Capn2	2.74119e-24	1.05321	0.255	0.174	6.50183e-20
Cyth3	4.51709e-24	1.19074	0.172	0.097	1.07141e-19
Rmdn3	5.07684e-24	1.17814	0.204	0.126	1.20418e-19
Pml	7.93306e-24	1.01996	0.232	0.152	1.88164e-19
Fam196a	1.11975e-23	1.77405	0.131	0.066	2.65593e-19
Gca	1.2928e-23	1.39727	0.121	0.056	3.06638e-19
Bag2	1.29566e-23	1.42687	0.155	0.085	3.07317e-19
C77080	2.14022e-23	1.03845	0.213	0.134	5.07639e-19
Gfer	2.25531e-23	1.27809	0.161	0.089	5.34937e-19
Gm15337	2.61799e-23	1.74248	0.107	0.047	6.2096e-19
Nrbp2	2.80752e-23	1.33735	0.15	0.081	6.65916e-19
Mob1a	9.76835e-23	1.1292	0.209	0.133	2.31696e-18
Abi2	1.13794e-22	1.03541	0.237	0.159	2.69908e-18
Ifngr2	1.15819e-22	1.44971	0.114	0.052	2.74712e-18
Gm4117	2.53253e-22	1.67184	0.133	0.069	6.0069e-18
Capn1	2.96516e-22	1.56408	0.118	0.057	7.03305e-18
Ripk2	4.06494e-22	1.27902	0.173	0.102	9.64162e-18
Rasgef1b	4.36111e-22	1.61568	0.128	0.065	1.03441e-17
Aqp2	5.62683e-22	1.45393	0.12	0.058	1.33463e-17
Mfsd4a	5.8143e-22	1.08573	0.232	0.159	1.37909e-17
Dsg2	5.92026e-22	1.65128	0.102	0.044	1.40423e-17
Epb41l4a	5.98928e-22	1.01837	0.163	0.092	1.4206e-17
Rpl30	6.14282e-22	1.46992	0.14	0.076	1.45702e-17
Katna1	6.73043e-22	1.02074	0.226	0.151	1.59639e-17
Taf4b	7.35432e-22	1.21431	0.135	0.069	1.74437e-17
Nectin2	8.02388e-22	1.35338	0.118	0.057	1.90318e-17
Slc17a4	1.00781e-21	1.58396	0.116	0.056	2.39042e-17
1810037I17Rik	1.55561e-21	1.07453	0.222	0.149	3.68976e-17
Gda	2.32699e-21	1.05061	0.195	0.122	5.51939e-17
Dkc1	2.41121e-21	1.36362	0.15	0.084	5.71915e-17
Gm28727	2.61511e-21	1.44969	0.127	0.065	6.20277e-17
4930444A19Rik	3.23221e-21	1.64862	0.129	0.068	7.66647e-17
Tnfaip1	5.19659e-21	1.08509	0.214	0.143	1.23258e-16
Ampd3	9.05263e-21	1.66233	0.105	0.049	2.14719e-16
Olfr1033	9.35556e-21	1.54042	0.15	0.086	2.21905e-16
Lrrc4	1.13501e-20	1.03478	0.303	0.238	2.69213e-16
Leprotl1	1.5311e-20	1.3476	0.134	0.072	3.63161e-16
Cacna1d	1.61894e-20	1.02448	0.181	0.111	3.83997e-16
Ets2	1.67607e-20	1.18539	0.163	0.097	3.97547e-16
Rps15a	1.68898e-20	1.36696	0.164	0.098	4.0061e-16
Cuedc1	2.10092e-20	1.31636	0.145	0.081	4.98318e-16
Rps7	2.34615e-20	1.18706	0.187	0.12	5.56483e-16
Kcnip4	2.37505e-20	1.08293	0.161	0.095	5.63339e-16
E530011L22Rik	4.32799e-20	1.54011	0.115	0.058	1.02656e-15
Bbs12	5.23863e-20	1.4227	0.138	0.077	1.24255e-15
Sf3b5	5.50285e-20	1.37933	0.147	0.084	1.30522e-15
Il17rc	6.24895e-20	1.38309	0.113	0.055	1.48219e-15
Pinx1	6.27683e-20	1.25467	0.16	0.095	1.4888e-15
Bcl10	6.95214e-20	1.59833	0.106	0.051	1.64898e-15
Fam111a	7.11978e-20	1.20861	0.219	0.151	1.68874e-15
Zbtb4	7.1302e-20	1.10231	0.181	0.113	1.69121e-15
Fbf1	8.55438e-20	1.06898	0.19	0.121	2.02901e-15
Arg2	1.74843e-19	1.88509	0.101	0.048	4.1471e-15
Bax	3.2098e-19	1.05817	0.232	0.164	7.61333e-15
Gm16552	4.39052e-19	1.19376	0.209	0.144	1.04139e-14
Ttpa	4.65942e-19	1.31554	0.116	0.059	1.10517e-14
Zpld1	5.84706e-19	1.42109	0.108	0.053	1.38686e-14
Carhsp1	5.86288e-19	1.40651	0.107	0.053	1.39062e-14
Tmem50a	9.51795e-19	1.23363	0.138	0.078	2.25756e-14
Nt5c	9.96502e-19	1.17688	0.17	0.106	2.3636e-14
Psmg4	1.28789e-18	1.31213	0.117	0.061	3.05474e-14
Slx4	1.50974e-18	1.03494	0.194	0.128	3.58095e-14
Gm17227	1.65211e-18	1.33276	0.136	0.078	3.91863e-14
Zdhhc2	2.05466e-18	1.21246	0.149	0.088	4.87346e-14
Mocos	2.22166e-18	1.09967	0.19	0.126	5.26957e-14
Shisa5	3.71151e-18	1.10308	0.208	0.144	8.80332e-14
Gm26836	4.50644e-18	1.18804	0.192	0.13	1.06888e-13
Vac14	4.57336e-18	1.06035	0.334	0.282	1.08475e-13
Ss18l1	5.6022e-18	1.44211	0.101	0.049	1.32879e-13
Nubp1	9.202e-18	1.20987	0.138	0.079	2.18262e-13
B4galt3	1.08506e-17	1.15039	0.15	0.09	2.57366e-13
Xlr5a	1.09881e-17	1.47278	0.104	0.052	2.60626e-13
Gm26835	1.11287e-17	1.07292	0.244	0.181	2.63961e-13
Cenpj	1.3288e-17	1.31869	0.12	0.065	3.15179e-13
Nsmf	1.74375e-17	1.01587	0.187	0.123	4.136e-13
Kcnh1	2.66759e-17	1.38605	0.136	0.079	6.32725e-13
Plpp2	2.69565e-17	1.37379	0.121	0.067	6.3938e-13
Ppp1r14b	2.81174e-17	1.19313	0.168	0.108	6.66917e-13
Gm15563	3.12965e-17	1.18998	0.2	0.14	7.42321e-13
Eml2	3.25646e-17	1.04248	0.19	0.127	7.724e-13
Keap1	4.19336e-17	1.02876	0.171	0.11	9.94623e-13
Nrxn2	5.46137e-17	1.37864	0.126	0.072	1.29538e-12
D930048N14Rik	5.59914e-17	1.0434	0.135	0.078	1.32806e-12
Ahr	5.88125e-17	1.54065	0.108	0.058	1.39497e-12
Gm16311	7.85688e-17	1.07345	0.398	0.362	1.86357e-12
Irf6	8.74353e-17	1.06974	0.144	0.086	2.07388e-12
Ston1	8.88617e-17	1.07683	0.173	0.112	2.10771e-12
Utp3	1.22997e-16	1.2794	0.11	0.058	2.91736e-12
Itga3	1.76305e-16	1.10719	0.181	0.122	4.18177e-12
Tmem65	1.77049e-16	1.18672	0.144	0.088	4.19942e-12
S100a13	2.35626e-16	1.32743	0.122	0.07	5.58881e-12
Coro1b	2.57553e-16	1.14477	0.155	0.098	6.1089e-12
Zc3h12b	3.77379e-16	1.1219	0.114	0.063	8.95105e-12
Nod1	4.05064e-16	1.1416	0.159	0.101	9.60772e-12
Rnf31	4.12356e-16	1.03856	0.159	0.101	9.78068e-12
Gm32250	4.5812e-16	1.55905	0.103	0.055	1.08662e-11
Pgs1	5.65907e-16	1.10552	0.156	0.099	1.34228e-11
Hoxb5os	6.15411e-16	1.29761	0.128	0.075	1.45969e-11
Wtip	6.32838e-16	1.22547	0.143	0.089	1.50103e-11
Tmem213	8.03207e-16	1.03986	0.291	0.244	1.90513e-11
Gm28501	8.47567e-16	1.44404	0.132	0.08	2.01034e-11
Lysmd4	8.5894e-16	1.01603	0.249	0.193	2.03732e-11
Ctla4	1.55081e-15	1.05911	0.148	0.093	3.67837e-11
Snu13	1.67217e-15	1.19746	0.151	0.096	3.96623e-11
Slc24a5	1.84432e-15	1.29271	0.132	0.08	4.37454e-11
Rpl12	1.8715e-15	1.23914	0.132	0.08	4.43902e-11
Fbxw9	2.01271e-15	1.20718	0.112	0.062	4.77395e-11
S100a16	3.19882e-15	1.33643	0.113	0.065	7.58727e-11
Hsp90aa1	4.80363e-15	1.1213	0.157	0.103	1.13937e-10
Mex3c	7.22353e-15	1.12036	0.154	0.1	1.71335e-10
Acat3	1.52114e-14	1.05476	0.166	0.111	3.608e-10
Adam15	2.0264e-14	1.07215	0.15	0.097	4.80641e-10
Eid1	2.19628e-14	1.2272	0.122	0.073	5.20935e-10
6330562C20Rik	2.21907e-14	1.0287	0.131	0.08	5.26342e-10
Vamp5	2.29411e-14	1.10527	0.152	0.1	5.44139e-10
Zfp984	2.31085e-14	1.23064	0.119	0.07	5.4811e-10
Gm11536	2.53862e-14	1.3285	0.105	0.059	6.02135e-10
Pak3	3.02363e-14	2.39837	0.126	0.079	7.17175e-10
Zfp185	3.63745e-14	1.04354	0.121	0.072	8.62768e-10
Pla2g3	6.13255e-14	1.39332	0.125	0.078	1.45458e-09
Gm15716	6.51821e-14	1.77125	0.147	0.098	1.54605e-09
2810425M01Rik	9.29575e-14	1.26903	0.121	0.074	2.20486e-09
Rpl22l1	1.13055e-13	1.1216	0.156	0.106	2.68155e-09
Itm2c	1.13489e-13	1.18586	0.123	0.075	2.69185e-09
1700030F04Rik	1.46392e-13	1.00954	0.185	0.133	3.47228e-09
Sub1	1.61649e-13	1.00746	0.218	0.167	3.83416e-09
Dph3	1.93346e-13	1.04016	0.157	0.106	4.58598e-09
Rgmb	2.19444e-13	1.1692	0.11	0.064	5.205e-09
Gm27017	2.84218e-13	1.15812	0.143	0.094	6.74136e-09
Akt1	3.23283e-13	1.05182	0.148	0.098	7.66794e-09
Ccdc88a	4.37173e-13	1.17537	0.108	0.064	1.03693e-08
Lad1	4.383e-13	1.18467	0.116	0.071	1.0396e-08
Hoxb2	4.43961e-13	1.17842	0.138	0.09	1.05303e-08
Cdk2ap2	4.93052e-13	1.14273	0.153	0.105	1.16947e-08
Gnl1	5.89252e-13	1.10741	0.112	0.067	1.39765e-08
Dcp2	8.85003e-13	1.00497	0.166	0.116	2.09914e-08
Srd5a1	9.00176e-13	1.16654	0.131	0.084	2.13513e-08
Banf1	9.72751e-13	1.24401	0.103	0.06	2.30727e-08
Gm26749	1.89365e-12	1.01853	0.207	0.16	4.49156e-08
Trmt112	2.1675e-12	1.18988	0.117	0.073	5.14111e-08
Bcat1	2.60365e-12	1.26671	0.129	0.083	6.17559e-08
Ran	2.64786e-12	1.24944	0.11	0.067	6.28047e-08
Supt4a	4.7174e-12	1.20963	0.108	0.066	1.11892e-07
Cyb561	5.72946e-12	1.07973	0.127	0.082	1.35897e-07
4930455C13Rik	6.51329e-12	1.28547	0.118	0.075	1.54489e-07
Gm10785	6.66816e-12	1.00178	0.183	0.135	1.58162e-07
Cd151	7.7715e-12	1.12316	0.114	0.071	1.84332e-07
Ccng2	7.82183e-12	1.19305	0.103	0.062	1.85526e-07
Peg3	8.47021e-12	1.23413	0.101	0.06	2.00905e-07
Sfr1	8.624e-12	1.04402	0.129	0.084	2.04553e-07
Gm49356	1.18436e-11	1.06205	0.16	0.114	2.80919e-07
Selenom	1.25456e-11	1.18852	0.119	0.077	2.97569e-07
Inpp5j	1.32166e-11	1.00551	0.149	0.103	3.13486e-07
Rsf1os1	1.51975e-11	1.27066	0.115	0.074	3.60469e-07
Leprot	1.66969e-11	1.11896	0.107	0.065	3.96033e-07
Tnip2	1.6784e-11	1.00025	0.123	0.079	3.981e-07
Map3k12	2.78569e-11	1.20272	0.103	0.063	6.60738e-07
Sharpin	2.83331e-11	1.06402	0.128	0.085	6.72034e-07
Spata2	3.03467e-11	1.15322	0.111	0.07	7.19793e-07
Lamb3	3.53601e-11	1.14594	0.124	0.081	8.38706e-07
Cfap65	3.91164e-11	1.21421	0.101	0.062	9.27802e-07
Gm16008	4.79441e-11	1.00712	0.106	0.066	1.13719e-06
Ranbp1	9.26764e-11	1.09296	0.127	0.085	2.19819e-06
Epha7	1.22141e-10	1.1091	0.107	0.067	2.89707e-06
Kcnk2	1.2241e-10	1.07506	0.135	0.093	2.90345e-06
Lrrfip1	1.33058e-10	1.24106	0.114	0.075	3.15601e-06
Snrpg	1.75644e-10	1.04162	0.108	0.068	4.16609e-06
Gm31036	2.17636e-10	1.33924	0.11	0.072	5.1621e-06
Tmem160	2.69874e-10	1.18277	0.127	0.087	6.40115e-06
Rsf1os2	2.80048e-10	1.08398	0.116	0.077	6.64247e-06
Tmem45b	4.38024e-10	1.06648	0.118	0.078	1.03895e-05
Gm26816	5.83392e-10	1.21166	0.119	0.081	1.38375e-05
Gm16541	9.57664e-10	1.03009	0.142	0.102	2.27148e-05
Gm37768	1.02917e-09	1.07495	0.112	0.075	2.4411e-05
Get4	1.20336e-09	1.01657	0.122	0.084	2.85425e-05
Hcfc1r1	1.22191e-09	1.01966	0.13	0.091	2.89826e-05
Gimap9	1.77862e-09	1.0649	0.102	0.066	4.21871e-05
Rcc2	1.80361e-09	1.11758	0.102	0.067	4.27798e-05
Cpe	1.90555e-09	1.28034	0.12	0.082	4.51978e-05
Hoxb7	3.56162e-09	1.0397	0.113	0.076	8.4478e-05
Pogk	3.86861e-09	1.04077	0.112	0.076	9.17595e-05
Gm47071	3.88354e-09	1.25766	0.102	0.067	9.21137e-05
Card19	6.93493e-09	1.17372	0.105	0.071	0.00016449
Snrpd1	2.44661e-08	1.0479	0.129	0.094	0.000580311
Gm15655	4.66257e-08	1.02234	0.121	0.088	0.00110591
Fam32a	6.01535e-08	1.01493	0.105	0.073	0.00142678
Cacybp	6.76105e-08	1.16535	0.104	0.073	0.00160365
Hk1	3.25837e-07	1.04047	0.104	0.074	0.00772852
Gm11099	6.1809e-07	1.07962	0.123	0.093	0.0146605

## Sheet: PT.bc.to.bl6
Table S2: Results from differential gene expression TCMR vs. Control
Differential expression was assessed using two-sided Wilcoxon rank-sum tests with Benjamini–Hochberg correction for multiple testing.
Proximal Tubules			*This Fold Change was calculated between [BALB/c to C57BL/6 ] and [BALB/c to BALB/c]
Gene upr.	p_val	avg_log2FC*	pct.1	pct.2	p_val_adj				Gene downr.	p_val	avg_log2FC*	pct.1	pct.2	p_val_adj
Iigp1	0	9.63371	0.978	0.008	0				Ces1d	0	-3.60424	0.127	0.744	0
Gbp2b	0	9.29304	0.843	0.008	0				Gm26870	0	-4.91291	0.04	0.631	0
Cd74	0	5.18243	0.996	0.161	0				Col27a1	0	-3.63043	0.109	0.645	0
H2-K1	0	5.386	0.992	0.159	0				Nat8f1	0	-2.54671	0.251	0.783	0
Ubd	0	9.83865	0.837	0.005	0				Acaa1b	0	-2.74434	0.209	0.717	0
H2-Ab1	0	5.11695	0.881	0.074	0				Nat8f3	0	-2.72684	0.227	0.729	0
H2-Eb1	0	5.5364	0.86	0.054	0				Ak4	0	-2.34036	0.275	0.764	0
H2-Aa	0	5.87009	0.836	0.041	0				Dnase1	0	-4.26528	0.048	0.53	0
Stat1	0	5.54691	0.922	0.133	0				Slc22a8	0	-2.26276	0.198	0.649	0
H2-D1	0	4.81045	0.988	0.244	0				Rdh16	0	-1.94139	0.268	0.719	0
Irgm1	0	4.71791	0.822	0.097	0				Ctnna2	0	-2.3428	0.179	0.629	0
B2m	0	4.83272	0.996	0.289	0				Slc22a22	0	-2.8378	0.1	0.548	0
Ly6a	0	3.98189	0.924	0.22	0				Nat8f6	0	-3.37049	0.087	0.532	0
Irgm2	0	5.89949	0.731	0.039	0				Rdh16f2	0	-1.75099	0.383	0.804	0
Psmb8	0	6.72319	0.697	0.016	0				Ces1f	0	-1.97036	0.277	0.697	0
Parp14	0	5.57391	0.722	0.045	0				Slc25a42	0	-1.89793	0.229	0.645	0
Ly6e	0	4.6159	0.736	0.068	0				Tln2	0	-1.8143	0.439	0.854	0
Gbp7	0	4.83579	0.757	0.103	0				Ugt3a2	0	-1.55596	0.405	0.813	0
Ciita	0	5.89047	0.677	0.026	0				Hsd3b3	0	-1.74968	0.354	0.759	0
Nlrc5	0	5.68213	0.663	0.029	0				Pck1	0	-2.2529	0.395	0.787	0
Gm20663	0	5.90892	0.669	0.041	0				Gm15962	0	-2.24385	0.218	0.601	0
Gm4951	0	10.0156	0.631	0.003	0				Slc22a28	0	-1.49029	0.458	0.841	0
Tmsb4x	0	3.50372	0.91	0.295	0				Slc22a30	0	-1.58684	0.399	0.78	0
Irf1	0	5.76696	0.645	0.032	0				Hsd3b2	0	-1.60755	0.308	0.684	0
Gm16685	0	3.76692	0.735	0.134	0				AI314278	0	-1.28103	0.406	0.782	0
Olfr56	0	7.06358	0.591	0.014	0				Ugt3a1	0	-2.40102	0.113	0.486	0
Vcam1	0	4.29487	0.604	0.042	0				Dhtkd1	0	-1.8416	0.219	0.589	0
H2-Q4	0	4.55989	0.599	0.049	0				Adhfe1	0	-1.55207	0.417	0.783	0
Gbp2	0	8.39294	0.552	0.004	0				Pbld1	0	-1.38052	0.486	0.849	0
H2-T23	0	4.41669	0.601	0.063	0				Tef	0	-1.49123	0.533	0.892	0
Tapbp	0	3.55702	0.638	0.115	0				Cyp2j11	0	-1.6524	0.342	0.7	0
Gbp8	0	6.83387	0.53	0.011	0				Slc22a29	0	-3.52414	0.045	0.402	0
Psmb9	0	6.92975	0.517	0.007	0				Prodh2	0	-1.64059	0.228	0.584	0
AW112010	0	8.5123	0.51	0.003	0				Angptl7	0	-3.08375	0.071	0.426	0
Tap1	0	6.67441	0.512	0.01	0				Vegfa	0	-1.33547	0.383	0.734	0
Cxcl10	0	6.79922	0.502	0.007	0				G6pc	0	-2.49069	0.141	0.491	0
C4b	0	3.65883	0.577	0.084	0				Miox	0	-1.66109	0.553	0.903	0
Tap2	0	4.42833	0.528	0.046	0				Cndp1	0	-1.92028	0.196	0.538	0
Tnfsf10	0	2.92587	0.651	0.188	0				Ppara	0	-1.70564	0.536	0.872	0
Herc6	0	4.33453	0.502	0.057	0				Car12	0	-1.704	0.337	0.67	0
Gm12216	0	5.54002	0.462	0.019	0				Hnf4aos	0	-1.45227	0.551	0.882	0
Gm4841	0	10.0672	0.426	0.001	0				Fmo2	0	-1.66917	0.482	0.809	0
Nfkbiz	0	2.63985	0.638	0.217	0				Cpeb3	0	-1.89861	0.606	0.927	0
Akt3	0	3.15664	0.537	0.117	0				Hgd	0	-1.19354	0.554	0.875	0
Parp9	0	2.97154	0.565	0.145	0				4930533I22Rik	0	-2.54634	0.103	0.423	0
Atp8a1	0	2.57232	0.637	0.218	0				Cyp4b1	0	-2.03139	0.457	0.776	0
Nuak2	0	1.75454	0.821	0.402	0				Sord	0	-1.38994	0.583	0.901	0
Bst2	0	4.83243	0.443	0.028	0				Ass1	0	-1.45431	0.551	0.861	0
Gbp3	0	6.0151	0.426	0.015	0				Vmn1r18	0	-3.31984	0.077	0.381	0
Rnf213	0	2.53796	0.686	0.286	0				0610005C13Rik	0	-1.14733	0.607	0.904	0
Actb	0	2.25029	0.859	0.459	0				Smarca2	0	-1.20197	0.557	0.845	0
Msn	0	1.93001	0.781	0.399	0				Cyp2d26	0	-2.91626	0.041	0.326	0
F830016B08Rik	0	8.2604	0.379	0.002	0				Aspa	0	-1.04992	0.597	0.88	0
Pla2g16	0	4.13753	0.417	0.045	0				Galnt11	0	-1.13307	0.62	0.894	0
Gm12185	0	6.63284	0.378	0.008	0				Fnip2	0	-1.70804	0.693	0.961	0
Stat2	0	2.71281	0.502	0.135	0				Pah	0	-1.40253	0.567	0.828	0
Cd274	0	6.20862	0.383	0.017	0				Cryl1	0	-1.32948	0.693	0.94	0
Serping1	0	6.45952	0.37	0.008	0				Nxph1	0	-5.99651	0.008	0.252	0
Cd52	0	6.39917	0.367	0.007	0				Fbp1	0	-1.05282	0.652	0.896	0
Gbp5	0	6.54414	0.371	0.012	0				Slc6a20b	0	-1.01011	0.674	0.915	0
Tmsb10	0	4.00793	0.393	0.034	0				Slc34a1	0	-1.9921	0.72	0.953	0
S100a11	0	2.12552	0.596	0.241	0				Phyhipl	0	-1.79305	0.722	0.953	0
Pdgfd	0	1.98084	0.595	0.242	0				Tnfaip8	0	-1.81209	0.655	0.867	0
Xdh	0	4.27827	0.395	0.046	0				Fggy	0	-1.07499	0.773	0.957	0
Il34	0	2.05696	0.623	0.276	0				Kcnj15	0	-1.026	0.788	0.95	0
Ifi27	0	2.86652	0.447	0.101	0				Sugct	0	-1.18074	0.864	0.981	0
Ifitm3	0	4.31657	0.379	0.034	0				Tanc2	0	-1.24007	0.875	0.978	0
Rps20	0	1.69374	0.762	0.421	0				Gk	0	-1.0934	0.871	0.964	0
Tgtp2	0	9.45504	0.338	0.001	0				Nox4	0	-1.44577	0.838	0.928	0
Trpm3	0	2.31563	0.482	0.149	0				Keg1	0	-1.64263	0.882	0.972	0
Havcr1	0	2.43499	0.456	0.128	0				P3h2	0	-1.01023	0.916	0.996	0
C3	0	2.64285	0.415	0.087	0				Ptprd	0	-1.1605	0.988	1	0
Psmb10	0	4.69474	0.341	0.02	0				Fut9	0	-1.14071	0.99	0.999	0
Adamts1	0	2.45295	0.511	0.191	0				Afm	3.68182e-304	-2.49149	0.074	0.369	8.7329e-300
Plac8	0	3.666	0.365	0.051	0				Fam13a	1.8131e-303	-1.35754	0.464	0.774	4.30049e-299
H2-T22	0	3.18879	0.384	0.071	0				Slc22a23	2.25208e-303	-1.54116	0.511	0.783	5.34172e-299
Ifit2	0	4.2962	0.339	0.03	0				Acsm5	1.43141e-300	-1.58929	0.246	0.591	3.39517e-296
Ccl5	0	5.55384	0.304	0.009	0				Eci3	1.10739e-297	-1.87918	0.181	0.512	2.62661e-293
H2-Q7	0	6.11634	0.295	0.006	0				Hykk	5.45737e-290	-1.17866	0.459	0.766	1.29443e-285
Rplp1	0	1.47421	0.75	0.462	0				Papss2	1.95147e-288	-1.15798	0.555	0.804	4.62869e-284
Tmem176b	0	1.68525	0.903	0.618	0				Aass	5.04592e-285	-1.05055	0.575	0.832	1.19684e-280
Gm4070	0	8.06048	0.286	0.002	0				Cda	4.06052e-283	-1.26363	0.404	0.72	9.63114e-279
Rpl32	0	1.42167	0.719	0.44	0				Acnat1	5.42234e-282	-1.29886	0.397	0.717	1.28612e-277
Tmem176a	0	1.56919	0.905	0.627	0				L2hgdh	1.19688e-279	-1.09837	0.507	0.791	2.83887e-275
Gm10073	0	1.45454	0.734	0.459	0				Tcn2	2.78505e-278	-1.1298	0.486	0.787	6.60585e-274
H2-DMb2	0	5.84692	0.281	0.008	0				Nlrp6	8.33689e-274	-1.47937	0.223	0.561	1.97743e-269
C1s1	0	5.06544	0.285	0.013	0				Ngef	1.36225e-272	-1.33311	0.343	0.664	3.23113e-268
Spp1	0	2.85353	0.999	0.731	0				Car14	1.03093e-271	-2.97201	0.034	0.277	2.44526e-267
Atp11a	0	1.43783	0.828	0.582	0				Cat	1.22138e-270	-1.20203	0.4	0.717	2.89698e-266
Dbi	0	1.12185	0.857	0.644	0				Rgs20	4.358e-270	-2.20593	0.129	0.423	1.03368e-265
Tpt1	0	1.15109	0.892	0.691	0				D630029K05Rik	9.82651e-265	-2.39279	0.065	0.329	2.33075e-260
Sema5a	0	1.22552	0.872	0.731	0				Igfbp4	2.37897e-263	-1.379	0.305	0.629	5.64267e-259
Sash1	0	1.37995	0.881	0.759	0				Xylt1	2.19535e-260	-1.27527	0.41	0.703	5.20716e-256
Fth1	0	1.22442	0.995	0.902	0				Mertk	2.08881e-257	-1.12459	0.438	0.735	4.95445e-253
Igsf5	0	1.27669	0.943	0.855	0				Fam214a	1.25622e-256	-1.11702	0.451	0.749	2.97963e-252
Rbpms	0	1.07247	0.929	0.882	0				Chd3	1.531e-251	-1.22971	0.38	0.689	3.63137e-247
Fhod3	0	1.11689	0.94	0.902	0				Aacs	3.54573e-249	-2.63099	0.104	0.366	8.41013e-245
Gm26917	0	1.0384	0.901	0.877	0				Ces1e	2.56334e-247	-3.70669	0.018	0.225	6.07998e-243
Lyz2	3.24003e-306	5.61962	0.276	0.01	7.68503e-302				Peli2	1.23855e-244	-1.10154	0.398	0.709	2.93771e-240
Oasl2	3.42975e-306	5.8031	0.272	0.007	8.13503e-302				Kynu	9.3117e-242	-1.50638	0.38	0.649	2.20864e-237
Serpina10	1.08485e-295	4.09447	0.297	0.025	2.57317e-291				Errfi1	9.63966e-242	-1.04216	0.731	0.893	2.28643e-237
Epsti1	1.20571e-283	5.81445	0.259	0.009	2.85983e-279				Gm32569	7.10126e-236	-1.4828	0.217	0.521	1.68435e-231
Slc41a2	2.05641e-283	2.15924	0.484	0.179	4.8776e-279				Chrna4	2.12789e-234	-2.69407	0.06	0.296	5.04714e-230
Rps29	9.41543e-278	1.19281	0.781	0.547	2.23325e-273				Lin7a	6.63563e-234	-2.59112	0.059	0.295	1.57391e-229
H2-DMa	4.28761e-275	4.75837	0.266	0.016	1.01698e-270				Gm41031	2.48165e-233	-2.28764	0.064	0.306	5.88622e-229
Ppp1r12a	1.9824e-274	1.00515	0.849	0.776	4.70205e-270				Abat	2.17157e-232	-1.08172	0.404	0.709	5.15074e-228
Ypel2	8.24129e-270	2.07422	0.586	0.314	1.95475e-265				Gabrb3	1.93027e-230	-1.25091	0.531	0.751	4.57841e-226
Zbp1	3.96823e-263	8.17714	0.227	0.001	9.41225e-259				Gm31718	3.85579e-230	-1.76625	0.243	0.525	9.14555e-226
Tinagl1	4.85856e-261	4.33536	0.266	0.022	1.1524e-256				Slc7a9	1.05592e-228	-1.22576	0.324	0.63	2.50455e-224
Pigr	9.49462e-261	1.55632	0.571	0.26	2.25203e-256				Vmn1r20	1.11941e-228	-2.58895	0.054	0.282	2.65512e-224
Map3k1	2.93524e-260	1.4788	0.665	0.425	6.96209e-256				Gatm	2.35637e-225	-1.6162	0.294	0.58	5.58907e-221
Fat1	4.49711e-259	1.67952	0.582	0.308	1.06667e-254				Cdkl1	3.23784e-224	-1.1449	0.352	0.657	7.67982e-220
Prickle2	1.03899e-257	2.25855	0.365	0.08	2.46438e-253				Lipa	3.0605e-218	-1.24904	0.392	0.661	7.25921e-214
Il7	1.53358e-254	2.96922	0.324	0.059	3.63749e-250				Slc13a2	7.56844e-218	-1.36586	0.274	0.562	1.79516e-213
Psme1	2.76954e-254	2.72903	0.357	0.082	6.56908e-250				Aspdh	3.2425e-216	-2.12065	0.071	0.307	7.69088e-212
Aig1	5.52021e-250	1.32072	0.678	0.421	1.30934e-245				Ttc7b	8.80706e-215	-1.11274	0.357	0.65	2.08895e-210
Rps24	1.42625e-248	1.28333	0.701	0.466	3.38291e-244				Olfm4	6.66052e-214	-1.61645	0.146	0.418	1.57981e-209
H2-DMb1	6.52176e-244	4.96245	0.234	0.011	1.5469e-239				Pm20d1	1.7093e-211	-1.39996	0.233	0.517	4.05428e-207
Stat3	8.24989e-244	1.57348	0.606	0.354	1.95679e-239				Gm14764	3.19884e-211	-2.36265	0.082	0.318	7.58732e-207
Snx10	1.81343e-243	3.53595	0.285	0.04	4.30129e-239				Aldh9a1	9.47839e-211	-1.52035	0.189	0.466	2.24818e-206
Sh3bgrl3	3.76467e-242	3.34244	0.295	0.047	8.92942e-238				Plscr4	7.93919e-210	-1.5225	0.204	0.479	1.8831e-205
Wdr89	3.98029e-242	1.24207	0.702	0.466	9.44085e-238				4732463B04Rik	2.36687e-209	-1.09201	0.346	0.644	5.61399e-205
Parp11	2.21773e-241	2.67296	0.356	0.09	5.26023e-237				Tmem150a	1.68491e-208	-1.10732	0.358	0.657	3.99644e-204
Rpl18	8.85348e-239	1.54757	0.594	0.327	2.09996e-234				Hoxb3os	1.6728e-204	-1.36236	0.214	0.498	3.96771e-200
Rnf19b	2.71637e-238	2.60349	0.382	0.115	6.44295e-234				Fmo1	6.23938e-204	-1.03064	0.422	0.699	1.47992e-199
Rps19	1.4775e-236	1.23689	0.689	0.456	3.50448e-232				Gm19950	7.57096e-204	-1.20444	0.289	0.583	1.79576e-199
Gm45871	7.38303e-233	2.44258	0.377	0.112	1.75118e-228				Asl	4.56972e-202	-1.71036	0.159	0.42	1.08389e-197
Dtx3l	4.24343e-232	3.34509	0.281	0.042	1.0065e-227				Gm6999	1.23594e-200	-1.01023	0.408	0.693	2.93152e-196
Samhd1	1.56902e-231	2.78093	0.356	0.096	3.72156e-227				Slc35f3	2.27393e-199	-1.0516	0.411	0.692	5.39352e-195
Erap1	1.70398e-231	2.39181	0.375	0.11	4.04166e-227				Kmo	6.84934e-199	-1.60724	0.124	0.378	1.6246e-194
Cxcl9	2.1879e-229	11.3981	0.198	0	5.18948e-225				Mturn	7.62092e-198	-1.79818	0.115	0.36	1.8076e-193
Csf1	1.67021e-227	4.02944	0.233	0.017	3.96158e-223				Spp2	2.478e-196	-2.68518	0.045	0.245	5.87758e-192
AU020206	3.60066e-225	3.49697	0.268	0.038	8.54039e-221				Ttr	1.11572e-194	-3.37861	0.027	0.208	2.64638e-190
Rpl14	2.32851e-224	1.39348	0.634	0.39	5.52299e-220				Dbp	5.95393e-194	-1.66795	0.114	0.359	1.41221e-189
Rpsa	2.64458e-223	1.24545	0.679	0.452	6.27269e-219				Pxmp2	2.64427e-193	-1.59284	0.133	0.385	6.27194e-189
Psap	3.55056e-223	1.23732	0.693	0.492	8.42157e-219				Acmsd	1.72242e-188	-1.14848	0.256	0.546	4.0854e-184
Pfkp	2.51963e-221	2.52568	0.338	0.086	5.97632e-217				Bhmt2	4.29311e-188	-1.35326	0.206	0.473	1.01828e-183
Fbxw17	9.20022e-221	2.641	0.319	0.072	2.1822e-216				Sgk2	5.78942e-188	-1.03939	0.337	0.627	1.37319e-183
Rplp0	5.60225e-220	1.31487	0.637	0.397	1.3288e-215				Glt1d1	5.06616e-187	-1.88835	0.124	0.359	1.20164e-182
Cd47	4.95928e-219	1.72306	0.512	0.256	1.17629e-214				Slc16a9	3.75358e-186	-1.41663	0.394	0.653	8.90311e-182
Patl2	2.51121e-218	4.31248	0.231	0.021	5.95634e-214				Neu2	5.41346e-186	-1.59984	0.141	0.387	1.28402e-181
Litaf	2.70055e-218	2.45556	0.335	0.084	6.40544e-214				Sema4g	1.41145e-185	-1.85147	0.089	0.312	3.34782e-181
Lrch1	1.2531e-217	1.65488	0.541	0.286	2.97223e-213				Man2a1	1.08901e-179	-1.03043	0.367	0.641	2.58303e-175
Cstb	3.28676e-214	2.33375	0.36	0.107	7.79586e-210				Slc13a3	1.98434e-178	-1.09658	0.509	0.703	4.70665e-174
Gvin1	5.09245e-213	7.82977	0.188	0.001	1.20788e-208				Gm10271	4.33594e-178	-2.17439	0.056	0.253	1.02844e-173
Unc93b1	5.88626e-213	2.7167	0.303	0.065	1.39616e-208				Gm29012	3.06085e-177	-5.00128	0.004	0.141	7.26003e-173
Rpl9-ps6	8.08546e-210	1.35529	0.622	0.382	1.91779e-205				Acnat2	1.57672e-174	-1.88678	0.088	0.303	3.73983e-170
Parp12	3.03085e-208	3.59517	0.243	0.03	7.18888e-204				Acp6	2.68414e-174	-1.38641	0.173	0.422	6.3665e-170
Rps27rt	9.79968e-207	1.19163	0.68	0.469	2.32439e-202				Dlg2	6.85241e-173	-1.90025	0.102	0.318	1.62532e-168
Txn1	3.7641e-205	1.38626	0.596	0.366	8.92807e-201				Limch1	2.04881e-172	-1.7898	0.131	0.36	4.85958e-168
Rpl27-ps3	1.02362e-203	1.37692	0.598	0.355	2.42792e-199				Gm17276	2.52101e-172	-1.35304	0.177	0.428	5.97959e-168
H2-Q6	2.40472e-203	5.0691	0.195	0.008	5.70375e-199				Cyp2e1	3.15231e-172	-3.00832	0.03	0.197	7.47695e-168
Ddx58	2.50229e-203	1.75097	0.457	0.202	5.93519e-199				Gm15318	1.52726e-170	-1.26489	0.198	0.456	3.6225e-166
Pfn1	1.31178e-202	1.6985	0.503	0.253	3.11142e-198				Sypl2	2.43818e-170	-1.42252	0.164	0.407	5.78312e-166
Rpl19	1.56762e-202	1.14359	0.682	0.467	3.71823e-198				Dmgdh	2.4466e-167	-1.29398	0.209	0.46	5.8031e-163
Wfdc2	3.63315e-199	1.29022	0.638	0.407	8.61748e-195				Acad11	1.63728e-165	-1.06471	0.296	0.556	3.88347e-161
Rad51b	9.3727e-198	2.61741	0.333	0.098	2.22311e-193				Lrit3	2.78773e-165	-3.78533	0.012	0.153	6.61222e-161
C1qb	1.42061e-196	6.3464	0.18	0.003	3.36955e-192				Usp2	1.34088e-164	-1.21861	0.221	0.473	3.18043e-160
Nmi	2.01436e-196	2.29725	0.336	0.098	4.77786e-192				Abhd18	2.37338e-164	-1.04858	0.292	0.558	5.62943e-160
Gm20696	1.17135e-195	3.44455	0.237	0.033	2.77832e-191				Clec2h	1.13304e-162	-2.95662	0.042	0.213	2.68745e-158
Rpl27a	5.16129e-195	1.3557	0.608	0.386	1.22421e-190				Akr1d1	3.11605e-161	-1.50413	0.114	0.333	7.39097e-157
Mcc	9.15104e-195	2.6406	0.369	0.13	2.17054e-190				Notum	2.28285e-160	-2.75296	0.026	0.182	5.41468e-156
Zc3hav1	1.05749e-191	2.13722	0.348	0.11	2.50825e-187				Ccdc107	4.63349e-160	-1.01109	0.316	0.584	1.09902e-155
Xaf1	2.98341e-191	4.56981	0.193	0.011	7.07636e-187				Ackr4	1.91917e-158	-1.54932	0.133	0.356	4.55208e-154
Gmds	6.80579e-191	1.19443	0.63	0.395	1.61427e-186				Sfxn2	1.32212e-156	-1.0746	0.254	0.511	3.13593e-152
Ackr3	1.53358e-190	1.44897	0.529	0.283	3.63749e-186				Isoc2a	3.17396e-155	-1.68494	0.102	0.308	7.52832e-151
Clic1	2.60996e-190	1.73445	0.463	0.22	6.19056e-186				Herpud1	7.527e-155	-1.07711	0.251	0.505	1.78533e-150
Adgrg1	1.2242e-187	1.60536	0.48	0.239	2.90368e-183				Slc26a1	7.9119e-154	-1.19913	0.19	0.43	1.87662e-149
Il18bp	9.01011e-186	4.05169	0.204	0.02	2.13711e-181				F13b	4.29355e-153	-1.98683	0.05	0.224	1.01839e-148
Rps8	1.89999e-185	1.00577	0.705	0.504	4.50658e-181				Glul	1.24369e-152	-1.18175	0.305	0.552	2.94991e-148
Fabp7	2.60031e-185	4.6928	0.19	0.012	6.16769e-181				Acot3	1.48533e-151	-3.36658	0.013	0.147	3.52305e-147
Rps9	1.91049e-184	1.18905	0.639	0.43	4.5315e-180				Fpgs	7.05413e-151	-1.24385	0.176	0.411	1.67317e-146
Trafd1	1.5266e-182	2.63385	0.283	0.068	3.62094e-178				Iqcm	1.85291e-148	-2.56882	0.04	0.199	4.39491e-144
Parp10	6.73895e-182	1.72194	0.446	0.209	1.59841e-177				Slc5a2	2.69559e-146	-1.20076	0.275	0.51	6.39366e-142
Gm20513	4.05871e-179	5.85671	0.17	0.005	9.62685e-175				Tcea3	4.65344e-145	-1.0339	0.247	0.496	1.10375e-140
S100a10	2.31998e-176	1.72832	0.431	0.196	5.50275e-172				Gpam	3.27877e-144	-1.45447	0.133	0.343	7.77691e-140
Slco1a1	2.43703e-176	2.9905	0.251	0.051	5.78039e-172				Gcdh	1.59657e-143	-1.2278	0.182	0.408	3.7869e-139
Ubb	2.49541e-173	1.12146	0.669	0.48	5.91885e-169				Slc6a19	9.48814e-142	-1.55114	0.25	0.457	2.25049e-137
C1qa	3.05165e-173	5.74153	0.165	0.005	7.2382e-169				Phtf2	1.43952e-141	-1.11752	0.232	0.47	3.4144e-137
Ptma	8.68565e-173	1.12939	0.666	0.489	2.06015e-168				Slc7a13	5.25999e-140	-1.86784	0.185	0.392	1.24762e-135
Gm44148	3.04374e-172	1.6222	0.41	0.171	7.21944e-168				Adtrp	1.97216e-139	-1.14039	0.266	0.497	4.67777e-135
Rps27a	5.1964e-172	1.21719	0.609	0.398	1.23253e-167				Ncam2	2.66198e-138	-1.83112	0.094	0.279	6.31394e-134
Rpl7	2.91595e-171	1.30925	0.565	0.347	6.91635e-167				Cmbl	4.5595e-138	-1.06222	0.216	0.45	1.08147e-133
Tmc1	4.60487e-171	6.08506	0.162	0.005	1.09223e-166				Echdc2	1.41541e-137	-1.09381	0.342	0.571	3.35721e-133
Tmem140	1.25417e-170	1.64619	0.473	0.254	2.97478e-166				Gm12353	7.51512e-137	-1.13041	0.299	0.529	1.78251e-132
Apol10b	2.50987e-169	6.08976	0.161	0.005	5.95316e-165				Unc5c	4.41331e-136	-1.24327	0.315	0.54	1.04679e-131
Gna13	5.94073e-169	1.41386	0.537	0.337	1.40908e-164				Gm4524	9.52499e-136	-2.69222	0.024	0.159	2.25923e-131
Rbl1	7.47505e-169	2.45704	0.287	0.08	1.77301e-164				Lyplal1	1.19126e-133	-1.32053	0.232	0.451	2.82555e-129
Umod	2.17776e-168	1.1585	0.669	0.486	5.16543e-164				Slc25a10	1.40441e-133	-1.04851	0.204	0.433	3.33112e-129
Dcdc2a	1.42463e-167	1.78777	0.382	0.155	3.37909e-163				Gm31600	3.23356e-133	-3.60496	0.011	0.128	7.66968e-129
Tuft1	6.77556e-166	1.75952	0.571	0.391	1.6071e-161				Prlr	1.12758e-132	-2.50223	0.058	0.217	2.6745e-128
Ifi44	6.31429e-165	5.92602	0.156	0.004	1.49769e-160				Lpar3	1.14038e-132	-1.09601	0.243	0.472	2.70488e-128
Rps23	1.96821e-164	1.20634	0.595	0.389	4.66841e-160				Tbxas1	2.18208e-132	-1.64014	0.125	0.317	5.17568e-128
Trim12c	3.42475e-164	2.26542	0.3	0.091	8.12315e-160				Slc34a3	1.52622e-131	-2.64906	0.024	0.157	3.62003e-127
Irf7	3.58344e-164	4.61631	0.165	0.008	8.49955e-160				Ppm1k	3.22303e-130	-1.58213	0.162	0.36	7.64471e-126
Plau	8.02643e-163	1.03041	0.583	0.33	1.90379e-158				Gm4450	6.71645e-129	-1.20167	0.275	0.495	1.59307e-124
Ly75	5.9188e-162	5.92016	0.153	0.004	1.40388e-157				Haao	6.79343e-129	-1.18886	0.155	0.365	1.61133e-124
Lgals1	3.64237e-161	2.0204	0.338	0.124	8.63934e-157				Acvr2b	1.00616e-128	-1.43904	0.143	0.339	2.38651e-124
Smad2	1.58005e-158	1.23995	0.573	0.384	3.74772e-154				Trdn	5.71464e-128	-2.88946	0.044	0.189	1.35546e-123
Rpl17	8.74231e-158	1.39548	0.515	0.297	2.07359e-153				Gm13412	6.62643e-128	-3.71991	0.008	0.116	1.57172e-123
Cp	7.13426e-154	1.50043	0.462	0.241	1.69218e-149				Cyp4a14	2.74915e-125	-4.46154	0.005	0.107	6.52071e-121
Calr	1.49417e-152	1.11862	0.617	0.433	3.54403e-148				Rorc	6.40263e-125	-1.42065	0.101	0.285	1.51864e-120
Zfp981	3.11517e-151	3.21501	0.2	0.032	7.38888e-147				Tmem25	7.23876e-125	-1.2541	0.141	0.34	1.71696e-120
S100a6	4.59061e-151	1.95848	0.302	0.099	1.08885e-146				Slc16a14	1.5097e-123	-1.79024	0.095	0.269	3.58087e-119
Sept11	2.23029e-148	1.10253	0.619	0.451	5.29003e-144				Paqr7	7.05205e-123	-1.64259	0.083	0.253	1.67268e-118
Socs1	6.62045e-147	7.76736	0.134	0.001	1.5703e-142				Aqp2	5.04669e-122	-1.30365	0.148	0.349	1.19702e-117
Mlkl	8.65275e-147	4.92617	0.15	0.008	2.05235e-142				Bcat2	5.06223e-119	-1.14831	0.152	0.352	1.20071e-114
Naaladl2	1.13268e-145	1.36419	0.491	0.28	2.6866e-141				Cit	1.53233e-118	-1.09162	0.193	0.4	3.63454e-114
Dexi	3.10867e-145	2.0029	0.314	0.114	7.37346e-141				Gm48321	2.98414e-118	-1.52464	0.157	0.345	7.07808e-114
Rps3	2.50832e-144	1.17809	0.567	0.371	5.94949e-140				AC135964.2	4.73076e-118	-1.32532	0.129	0.315	1.12209e-113
Idnk	3.15147e-143	1.98389	0.308	0.11	7.47498e-139				Vmn1r19	2.95983e-117	-2.31119	0.026	0.15	7.02043e-113
Icam1	3.73805e-143	2.43701	0.267	0.081	8.86629e-139				Acaa2	3.02779e-117	-1.61059	0.072	0.231	7.18161e-113
Lgals3bp	7.55999e-143	3.12444	0.193	0.032	1.79315e-138				Zfp395	1.85256e-116	-1.53119	0.085	0.251	4.39408e-112
Birc3	2.78825e-141	1.9999	0.3	0.105	6.61346e-137				Gm40123	1.9638e-116	-1.47164	0.098	0.27	4.65793e-112
Myh9	6.74754e-141	1.16415	0.57	0.394	1.60045e-136				Slc37a4	3.12762e-116	-1.278	0.101	0.278	7.41841e-112
Rps16	3.89936e-140	1.21198	0.533	0.335	9.24888e-136				Lrp4	5.33753e-116	-1.32848	0.109	0.287	1.26601e-111
Sbno2	5.80136e-139	1.55776	0.434	0.237	1.37603e-134				Slc35f1	2.37782e-113	-1.74257	0.087	0.248	5.63996e-109
Gm9951	1.60106e-138	2.13598	0.279	0.091	3.79756e-134				Gm48383	2.65205e-113	-2.03153	0.047	0.185	6.29039e-109
Rps4x	6.15236e-138	1.23088	0.531	0.335	1.45928e-133				Mgll	3.58739e-113	-1.97644	0.051	0.192	8.50893e-109
C1ra	1.09943e-137	4.08421	0.152	0.013	2.60775e-133				Gm26854	6.09939e-113	-1.27383	0.159	0.35	1.44672e-108
Tspo	2.52809e-137	1.68053	0.395	0.197	5.99638e-133				Aqp11	2.79095e-110	-1.36207	0.092	0.258	6.61985e-106
Anxa5	3.64979e-137	2.10515	0.285	0.098	8.65693e-133				Aamdc	3.65905e-110	-1.19252	0.134	0.318	8.6789e-106
Bspry	4.76578e-137	1.97742	0.286	0.096	1.1304e-132				Pdk2	6.98383e-110	-1.0493	0.166	0.363	1.6565e-105
Tnfaip8l3	1.4073e-136	4.07954	0.15	0.012	3.33798e-132				Hmgcs2	1.29316e-109	-3.56608	0.008	0.104	3.06725e-105
Rps5	1.04275e-135	1.36399	0.478	0.284	2.47329e-131				Sms	9.84625e-109	-1.48515	0.08	0.236	2.33543e-104
Arhgap8	1.29034e-134	3.87857	0.153	0.015	3.06055e-130				Sardh	9.94481e-108	-1.18358	0.119	0.295	2.35881e-103
Usp18	1.2173e-133	4.33964	0.145	0.011	2.88732e-129				Acox3	2.43149e-107	-1.16139	0.153	0.336	5.76725e-103
Zbed3	2.22318e-133	1.74599	0.408	0.22	5.27316e-129				Zfp467	6.973e-107	-1.09379	0.17	0.362	1.65393e-102
Rps15	3.0304e-132	1.00213	0.63	0.467	7.1878e-128				Fmnl1	1.6789e-106	-1.03674	0.167	0.358	3.98218e-102
Stra6l	5.08734e-130	2.31621	0.243	0.071	1.20667e-125				Susd3	1.72186e-106	-1.15753	0.151	0.336	4.08408e-102
Slc44a3	7.21343e-130	3.35508	0.172	0.026	1.71095e-125				Adra1a	8.92215e-106	-1.16492	0.264	0.457	2.11625e-101
Gab3	2.55992e-129	2.6043	0.2	0.043	6.07187e-125				Gm10804	1.69253e-105	-1.31253	0.099	0.265	4.01451e-101
Ngf	2.60829e-129	2.48769	0.182	0.031	6.1866e-125				Acy1	5.14623e-105	-1.10602	0.142	0.328	1.22064e-100
Pced1b	3.36212e-128	2.86353	0.186	0.035	7.97461e-124				Prodh	1.59765e-104	-1.03147	0.211	0.408	3.78947e-100
Ctss	4.42637e-128	5.46926	0.125	0.004	1.04989e-123				Slc15a4	1.16273e-103	-1.49513	0.09	0.245	2.75788e-99
Dysf	1.72567e-127	2.95802	0.167	0.024	4.09312e-123				Irs2	3.55209e-103	-1.40353	0.097	0.257	8.42521e-99
Neurl3	1.81105e-127	5.03141	0.129	0.006	4.29563e-123				Enpp1	5.07396e-103	-1.5977	0.063	0.205	1.20349e-98
Creb5	1.9148e-127	1.86503	0.222	0.056	4.54172e-123				Egf	2.86032e-101	-1.22162	0.11	0.277	6.78439e-97
Rpl26	2.07163e-127	1.39179	0.443	0.25	4.91371e-123				Tmem178	9.05721e-101	-1.24451	0.118	0.285	2.14828e-96
Cadps2	2.50314e-127	1.98103	0.325	0.137	5.9372e-123				Vwce	1.50306e-100	-1.31764	0.094	0.251	3.5651e-96
Ifih1	6.98287e-127	2.12085	0.258	0.084	1.65627e-122				Gm45083	4.87431e-100	-1.02814	0.146	0.326	1.15614e-95
Mgp	1.23799e-125	3.39461	0.166	0.026	2.9364e-121				Atxn7l2	1.07265e-99	-1.85255	0.037	0.158	2.54423e-95
Utrn	1.65774e-125	1.05327	0.455	0.228	3.93199e-121				Gm15883	3.18308e-99	-2.04407	0.03	0.144	7.54995e-95
Usp25	1.7329e-125	1.04116	0.578	0.424	4.11027e-121				Ggnbp1	5.27281e-99	-1.28854	0.11	0.271	1.25066e-94
Ube2l6	3.71489e-125	5.0269	0.122	0.004	8.81135e-121				Tmem131l	2.6955e-98	-1.38763	0.105	0.261	6.39346e-94
Psd3	8.23214e-124	1.1643	0.262	0.082	1.95258e-119				Gm48606	2.97765e-98	-2.42465	0.028	0.138	7.06268e-94
Tapbpl	1.23294e-123	2.38006	0.228	0.065	2.9244e-119				Slc39a5	3.32972e-98	-2.16551	0.027	0.137	7.89777e-94
Dync1h1	1.62048e-123	1.00748	0.593	0.441	3.84361e-119				Cyp2j7	3.44373e-98	-1.34092	0.1	0.255	8.16817e-94
Heph	2.77292e-123	1.40875	0.453	0.269	6.57709e-119				Gm49380	1.13933e-96	-1.38566	0.09	0.24	2.70239e-92
Rpl22	9.64421e-123	1.19967	0.502	0.318	2.28751e-118				Slc8a1	2.39717e-96	-1.1791	0.059	0.193	5.68585e-92
Lypd6b	1.60261e-122	3.19824	0.159	0.023	3.80123e-118				Gjb1	6.13566e-95	-2.19271	0.028	0.135	1.45532e-90
Misp	1.94634e-122	2.23552	0.215	0.056	4.61651e-118				C330002G04Rik	2.40901e-94	-1.10903	0.183	0.359	5.71392e-90
Isg15	2.04571e-122	5.63794	0.118	0.003	4.85222e-118				9630028H03Rik	3.82171e-94	-1.32486	0.117	0.276	9.06471e-90
Specc1	3.76434e-120	2.10011	0.238	0.073	8.92864e-116				Fam151a	4.60546e-94	-1.33222	0.096	0.247	1.09237e-89
Ankrd6	9.10188e-120	1.1547	0.483	0.289	2.15888e-115				Gm36975	9.64302e-94	-1.01482	0.21	0.393	2.28723e-89
Scin	4.5058e-119	1.60188	0.246	0.077	1.06873e-114				Tsc22d3	1.05902e-93	-1.11777	0.133	0.3	2.51188e-89
Rtp4	5.18685e-119	3.37741	0.15	0.02	1.23027e-114				Lonrf3	3.37285e-93	-1.51906	0.068	0.204	8.00006e-89
Rpl21	3.42879e-117	3.41734	0.157	0.025	8.13274e-113				Lonrf1	5.02342e-93	-1.34597	0.091	0.237	1.19151e-88
Gpc3	5.21922e-117	1.9166	0.249	0.081	1.23795e-112				Gm45051	8.48609e-92	-1.75926	0.038	0.153	2.01282e-87
Plekhm3	1.36549e-116	1.38237	0.404	0.218	3.23881e-112				Pqlc2	1.05663e-91	-1.19767	0.118	0.275	2.50623e-87
Rpl29	1.47209e-116	4.82942	0.122	0.007	3.49164e-112				Dcxr	7.08383e-90	-1.23361	0.085	0.228	1.68021e-85
Gm6034	3.01347e-116	2.82891	0.174	0.035	7.14764e-112				Kcnc2	1.17432e-89	-1.46741	0.093	0.236	2.78538e-85
Lgals3	1.19601e-115	2.69999	0.187	0.043	2.83681e-111				Slc28a1	1.33819e-89	-1.14929	0.132	0.293	3.17405e-85
Arhgap15	1.59174e-115	1.79077	0.338	0.16	3.77544e-111				Gm16170	1.40253e-89	-1.5819	0.065	0.194	3.32667e-85
C1s2	3.68765e-115	5.31396	0.113	0.004	8.74674e-111				Coq8a	2.17876e-89	-1.25184	0.078	0.217	5.16779e-85
Calm1	9.7333e-115	1.33674	0.432	0.253	2.30864e-110				Flvcr2	2.90136e-89	-1.01201	0.137	0.3	6.88174e-85
Vim	2.17679e-114	4.17139	0.129	0.011	5.16313e-110				Lpin1	6.23174e-89	-1.06884	0.138	0.301	1.47811e-84
Cdh1	4.01481e-114	1.45571	0.392	0.21	9.52274e-110				Cyp2d22	8.98318e-89	-1.26058	0.11	0.26	2.13072e-84
G3bp2	2.47518e-113	1.30295	0.43	0.251	5.87087e-109				4930517O19Rik	1.34854e-88	-1.16636	0.14	0.3	3.1986e-84
Susd1	3.57947e-113	2.56603	0.189	0.045	8.49015e-109				AC140300.3	2.75285e-88	-2.25771	0.029	0.131	6.52949e-84
Tgm2	5.2142e-113	1.34146	0.42	0.239	1.23676e-108				Gm15298	2.59753e-87	-3.04089	0.017	0.106	6.16109e-83
Laptm4a	4.12432e-112	1.14862	0.499	0.329	9.78248e-108				Aspg	2.56273e-85	-1.12378	0.138	0.296	6.07853e-81
Tyrobp	3.45371e-111	5.33316	0.111	0.004	8.19186e-107				Aqp4	7.09813e-85	-2.85118	0.021	0.114	1.68361e-80
Col18a1	4.72102e-111	1.32728	0.377	0.192	1.11978e-106				Cnnm1	9.93795e-85	-1.13855	0.137	0.293	2.35718e-80
Serpinb9	8.27501e-111	3.62217	0.142	0.019	1.96275e-106				Cyfip2	1.07822e-84	-1.01447	0.212	0.386	2.55742e-80
Rpl39	1.07574e-110	1.36812	0.406	0.227	2.55154e-106				Fn3k	2.30285e-84	-1.76924	0.041	0.151	5.46214e-80
9530082P21Rik	2.11869e-110	3.76611	0.132	0.015	5.02532e-106				Gm15261	5.2338e-84	-1.20184	0.156	0.313	1.24141e-79
Rps11	2.02339e-109	1.30357	0.439	0.265	4.79928e-105				Gm31458	4.1453e-83	-1.58623	0.059	0.179	9.83225e-79
Fas	3.21653e-109	2.27059	0.21	0.061	7.62929e-105				Slc5a12	5.58561e-83	-1.81168	0.337	0.456	1.32485e-78
Sqle	5.37225e-109	2.00411	0.244	0.085	1.27424e-104				Gm37245	5.82576e-83	-1.27271	0.334	0.492	1.38181e-78
H2-M3	2.45016e-108	5.1236	0.109	0.004	5.81154e-104				Gm19461	1.21123e-82	-1.36012	0.075	0.205	2.87291e-78
Tubb5	7.30864e-107	2.33064	0.204	0.059	1.73354e-102				Slc18a1	2.8013e-81	-1.54614	0.159	0.314	6.64439e-77
Exoc3l4	1.44439e-106	3.40842	0.13	0.015	3.42594e-102				4933417A18Rik	1.51549e-80	-2.38963	0.017	0.102	3.59458e-76
Cst3	1.20198e-104	1.32739	0.428	0.26	2.85097e-100				Mcrip2	7.85947e-80	-1.04089	0.117	0.264	1.86419e-75
S100a4	6.61439e-104	5.56616	0.101	0.003	1.56887e-99				B3galnt1	1.762e-79	-1.64941	0.042	0.149	4.17929e-75
Gm10036	5.26942e-103	1.16355	0.467	0.302	1.24985e-98				Agbl1	7.19253e-79	-2.06787	0.027	0.12	1.706e-74
Tnfrsf12a	1.89044e-102	2.37346	0.176	0.043	4.48394e-98				Gm10658	3.92743e-78	-1.15278	0.1	0.237	9.31547e-74
Mllt3	3.90734e-102	1.03394	0.553	0.395	9.26781e-98				C920021L13Rik	6.39817e-78	-1.08031	0.114	0.257	1.51758e-73
Slco2a1	8.02162e-102	1.42919	0.351	0.18	1.90265e-97				Idua	1.44709e-77	-1.51346	0.048	0.157	3.43236e-73
Upp1	1.13289e-101	4.36621	0.107	0.006	2.68709e-97				March1	2.00057e-77	-1.01053	0.272	0.438	4.74516e-73
Relb	2.06923e-101	2.28498	0.162	0.034	4.908e-97				BB365896	2.43592e-77	-2.14819	0.021	0.107	5.77777e-73
Fcer1g	6.25758e-101	4.87653	0.107	0.006	1.48424e-96				Insig1	3.12012e-76	-1.73723	0.044	0.147	7.40062e-72
Ppa1	8.94301e-101	2.27566	0.199	0.06	2.12119e-96				Acss1	4.51653e-76	-1.46791	0.125	0.261	1.07128e-71
Brip1	6.19467e-99	2.96548	0.151	0.03	1.46931e-94				Tmem64	1.61558e-75	-1.04748	0.128	0.272	3.83199e-71
Lcn2	1.61525e-98	3.19617	0.128	0.017	3.83121e-94				Gm13561	3.42321e-75	-1.27997	0.095	0.225	8.11951e-71
Dpysl3	1.94396e-98	1.80566	0.211	0.066	4.61087e-94				Nat8	6.69183e-75	-1.12032	0.157	0.306	1.58723e-70
Adgrg3	3.45856e-98	3.41722	0.123	0.015	8.20335e-94				Cyp2d9	1.41862e-74	-1.69888	0.045	0.148	3.36483e-70
Timd2	4.61759e-98	1.65311	0.297	0.137	1.09525e-93				Gm30097	1.44778e-74	-1.10118	0.096	0.23	3.43399e-70
Nfkb1	1.53609e-97	1.10867	0.495	0.339	3.64346e-93				Spock3	3.60152e-74	-1.57041	0.047	0.152	8.54244e-70
Tenm3	2.35789e-97	1.5708	0.31	0.144	5.59268e-93				Grb7	1.32308e-73	-1.01235	0.126	0.268	3.13822e-69
Frk	2.62279e-97	1.35606	0.368	0.198	6.221e-93				Gm14437	2.50918e-72	-2.26914	0.022	0.105	5.95153e-68
Ifi44l	3.313e-97	4.97524	0.101	0.005	7.85811e-93				Lpl	4.52855e-72	-1.17688	0.119	0.257	1.07413e-67
Ttc39b	3.50228e-97	2.38508	0.183	0.05	8.30707e-93				AC166995.1	8.08283e-71	-1.11783	0.085	0.209	1.91717e-66
Rpl11	1.52134e-96	1.15994	0.459	0.301	3.60847e-92				Ehhadh	8.51379e-71	-1.15901	0.317	0.474	2.01939e-66
Ncam1	4.17591e-96	2.11354	0.197	0.06	9.90485e-92				Adgrb3	5.139e-70	-2.16202	0.089	0.206	1.21892e-65
Asap3	3.7797e-95	1.44199	0.356	0.194	8.96506e-91				Nol4	7.62269e-69	-1.93775	0.036	0.127	1.80803e-64
Mid1	4.09045e-95	1.22882	0.453	0.287	9.70214e-91				Abcb1b	1.32497e-67	-1.55386	0.048	0.146	3.1427e-63
Plgrkt	7.74153e-95	1.5792	0.293	0.136	1.83621e-90				Cyp51	1.63484e-67	-1.39824	0.141	0.271	3.87767e-63
Fyb2	2.80841e-94	1.11817	0.402	0.233	6.66126e-90				Etv5	1.58821e-66	-1.01911	0.13	0.264	3.76707e-62
Gm8126	3.82242e-94	1.79871	0.239	0.091	9.06639e-90				Gm21057	2.61562e-66	-1.67557	0.034	0.123	6.20398e-62
Adar	1.91513e-93	1.46015	0.315	0.155	4.54251e-89				Cyp2f2	2.16043e-65	-1.64165	0.032	0.119	5.12433e-61
Tsc22d1	7.6892e-93	1.15102	0.452	0.297	1.8238e-88				D630023F18Rik	6.59138e-65	-1.97556	0.032	0.117	1.56341e-60
Mvp	1.17643e-92	2.01651	0.205	0.068	2.79038e-88				Slc7a8	8.23224e-63	-1.19794	0.128	0.256	1.9526e-58
Rpl4	3.65476e-92	1.18928	0.433	0.276	8.66873e-88				Gm12962	5.82729e-62	-1.87954	0.031	0.112	1.38217e-57
Ctsc	4.31603e-92	4.30807	0.102	0.008	1.02372e-87				Sardhos	6.32518e-62	-1.25414	0.059	0.16	1.50027e-57
Ifi27l2a	6.58509e-92	3.26883	0.119	0.016	1.56192e-87				Retsat	8.79034e-62	-1.19089	0.055	0.154	2.08498e-57
Mfge8	8.93158e-92	3.20491	0.125	0.019	2.11848e-87				Slc5a4a	1.26208e-60	-1.97658	0.063	0.159	2.99354e-56
Ctps	6.79694e-91	1.52008	0.319	0.163	1.61217e-86				Gm34868	5.09024e-60	-1.4517	0.044	0.133	1.20735e-55
Rpl24	1.48945e-90	1.08456	0.466	0.308	3.53283e-86				Rsph3b	7.03894e-60	-1.05139	0.096	0.211	1.66957e-55
Rack1	1.80142e-90	1.05445	0.49	0.344	4.27279e-86				Fam228b	9.76455e-60	-1.49183	0.046	0.137	2.31605e-55
Sesn3	2.29381e-90	1.23728	0.403	0.241	5.44068e-86				Bbox1	3.06579e-59	-1.32565	0.098	0.209	7.27174e-55
Pomp	1.74662e-89	1.7023	0.275	0.127	4.14281e-85				Rfng	2.28638e-58	-1.34165	0.053	0.146	5.42307e-54
Ifi35	9.72018e-89	2.18947	0.18	0.053	2.30553e-84				Car4	5.39332e-58	-1.08133	0.094	0.205	1.27924e-53
Socs2	1.81565e-88	1.41366	0.334	0.176	4.30654e-84				Wdr17	8.64031e-58	-1.06132	0.668	0.775	2.04939e-53
Plin2	2.69e-88	2.13653	0.201	0.07	6.3804e-84				Gm47320	1.18992e-57	-1.78877	0.035	0.115	2.82238e-53
Btg1	3.03291e-88	1.60978	0.266	0.119	7.19375e-84				Acss2os	1.57671e-57	-1.7081	0.027	0.102	3.73979e-53
Rpl18a	3.17476e-88	1.13828	0.432	0.274	7.5302e-84				Zmynd10	3.27757e-57	-1.51745	0.034	0.113	7.77408e-53
Apobec3	1.03992e-87	3.6781	0.104	0.01	2.46659e-83				Rnase4	2.96984e-56	-1.93834	0.031	0.107	7.04417e-52
Nup210	1.07124e-87	1.58834	0.267	0.119	2.54088e-83				Cntnap2	3.17374e-56	-1.24435	0.067	0.165	7.52779e-52
Dgkg	7.31708e-87	1.04349	0.464	0.308	1.73554e-82				A630001O12Rik	8.82477e-56	-1.8477	0.027	0.101	2.09315e-51
Sectm1b	3.04296e-86	2.33963	0.157	0.04	7.21759e-82				Shmt2	9.43872e-56	-1.15387	0.065	0.163	2.23877e-51
Parp3	4.78637e-86	1.38128	0.323	0.169	1.13528e-81				Gm11342	1.83575e-55	-1.04675	0.183	0.312	4.35421e-51
Capns1	1.9592e-84	1.43602	0.314	0.164	4.64703e-80				Tcp11l2	2.3229e-55	-1.39458	0.044	0.129	5.50969e-51
Klf6	5.2658e-84	1.67883	0.268	0.125	1.24899e-79				Slc22a27	5.33226e-55	-1.83054	0.03	0.105	1.26476e-50
Myof	1.19569e-83	1.13734	0.313	0.155	2.83606e-79				Gprin3	1.0252e-54	-1.14145	0.084	0.187	2.43167e-50
Ccdc178	4.35125e-82	1.60089	0.234	0.096	1.03207e-77				Gm48249	1.22135e-54	-1.23394	0.053	0.144	2.89691e-50
Eif2ak2	5.00232e-82	1.54206	0.275	0.132	1.1865e-77				Fmo5	1.73166e-53	-1.20716	0.083	0.184	4.10733e-49
Slc34a2	3.24136e-81	3.01088	0.107	0.015	7.68819e-77				Unc13c	7.86812e-53	-1.13775	0.121	0.233	1.86624e-48
Fkbp1a	1.1307e-80	1.26449	0.361	0.214	2.6819e-76				Cxcl12	2.1566e-52	-1.01585	0.069	0.165	5.11524e-48
Plekha2	1.41101e-80	1.59173	0.256	0.116	3.34678e-76				Hsd11b2	8.53128e-51	-1.48161	0.031	0.104	2.02353e-46
Fer	3.05573e-80	1.04989	0.431	0.279	7.24788e-76				Esrp2	2.77773e-50	-1.48642	0.039	0.116	6.5885e-46
A930015D03Rik	7.71488e-80	1.33871	0.312	0.165	1.82989e-75				Dixdc1	8.37979e-50	-1.03201	0.075	0.17	1.9876e-45
Gm9844	2.09073e-79	3.49969	0.105	0.015	4.95901e-75				C1qtnf3	1.22181e-49	-1.09522	0.083	0.18	2.89801e-45
Tor3a	2.88491e-79	2.49129	0.141	0.035	6.84272e-75				Gm14320	1.24787e-47	-1.51624	0.035	0.106	2.95982e-43
Slc1a4	1.96775e-78	1.44528	0.269	0.128	4.66732e-74				Pik3c2g	1.38432e-47	-1.6221	0.037	0.11	3.28347e-43
Bcl3	5.28258e-78	2.20525	0.159	0.047	1.25298e-73				Gsta2	2.08254e-47	-1.26747	0.046	0.124	4.93958e-43
Gm7030	5.33167e-78	3.01323	0.117	0.022	1.26462e-73				Fam107a	2.91817e-47	-1.182	0.114	0.216	6.9216e-43
Tagln2	1.22982e-77	1.91833	0.194	0.071	2.91701e-73				Slc27a1	3.47801e-47	-1.03812	0.067	0.155	8.24949e-43
Ugt2b37	1.02318e-76	2.10724	0.185	0.066	2.42687e-72				Serpinb8	9.57765e-47	-1.47476	0.036	0.107	2.27172e-42
A230050P20Rik	1.06733e-76	1.89546	0.173	0.056	2.53161e-72				A930033H14Rik	1.42923e-46	-1.53956	0.037	0.108	3.38999e-42
S100a1	2.4307e-76	1.20646	0.386	0.244	5.76537e-72				Ctsf	1.57393e-46	-1.27444	0.043	0.118	3.7332e-42
Spag6l	2.62065e-76	1.34272	0.329	0.188	6.21593e-72				Cdh4	2.85587e-46	-1.30049	0.037	0.109	6.77384e-42
Mt1	1.98604e-75	1.25972	0.307	0.166	4.71069e-71				Nr1d1	6.86908e-46	-1.08223	0.059	0.142	1.62928e-41
Jazf1	3.30125e-75	2.09674	0.139	0.035	7.83023e-71				Abcb1a	2.286e-45	-1.33064	0.052	0.131	5.42216e-41
Zscan21	1.10447e-74	1.32757	0.325	0.185	2.61968e-70				Gm13856	5.02382e-45	-1.15306	0.068	0.153	1.1916e-40
Fam83g	2.91409e-74	1.21356	0.525	0.414	6.91194e-70				Nxpe3	1.64146e-44	-1.06914	0.109	0.207	3.89337e-40
Rps26	4.01365e-74	1.1618	0.386	0.246	9.51999e-70				Gm11659	2.64655e-42	-1.02815	0.059	0.138	6.27734e-38
Gdf15	6.26855e-73	2.18664	0.144	0.04	1.48684e-68				1700110K17Rik	3.25196e-42	-1.11161	0.101	0.195	7.71333e-38
Eda	2.0011e-72	1.68475	0.213	0.089	4.74642e-68				AC110166.2	5.00031e-42	-1.16101	0.055	0.131	1.18602e-37
Cebpb	3.09179e-72	2.02284	0.172	0.06	7.33343e-68				Mast3	2.04021e-40	-1.23875	0.055	0.129	4.83917e-36
Abhd2	4.87398e-72	1.01422	0.384	0.24	1.15606e-67				Mroh7	7.30024e-40	-1.02249	0.067	0.146	1.73154e-35
Gnai2	3.70329e-71	1.18853	0.362	0.225	8.78383e-67				Kcnb2	1.1828e-39	-1.12126	0.062	0.139	2.80549e-35
Hdac7	1.0957e-69	1.61999	0.188	0.071	2.59889e-65				Clcn2	1.97322e-39	-1.17393	0.048	0.117	4.68029e-35
Dynll1	2.0623e-69	1.27979	0.298	0.163	4.89158e-65				Gm42397	3.55243e-37	-1.12898	0.218	0.319	8.42601e-33
Efhd2	2.94644e-69	2.22075	0.148	0.046	6.98865e-65				Slc25a34	1.59227e-36	-1.07664	0.041	0.105	3.77671e-32
Rps14	5.85731e-69	1.02982	0.429	0.297	1.38929e-64				Tlcd1	2.98445e-36	-1.13397	0.04	0.103	7.07881e-32
Cfl1	1.10636e-68	1.43755	0.278	0.149	2.62417e-64				Gm15396	1.59364e-34	-1.07233	0.205	0.306	3.77995e-30
Phactr1	1.47052e-68	1.3388	0.2	0.081	3.48793e-64				Gm45645	1.92942e-34	-1.00833	0.07	0.143	4.5764e-30
Rps10	1.59842e-68	1.09838	0.4	0.27	3.79129e-64				Gldc	2.81612e-34	-1.04154	0.114	0.198	6.67955e-30
Coro1c	1.6655e-68	1.18308	0.35	0.216	3.95039e-64				Efna1	3.81238e-34	-1.07915	0.045	0.107	9.04259e-30
Adap1	2.93749e-68	1.54875	0.222	0.099	6.96744e-64				4933406C10Rik	1.43034e-29	-1.05135	0.045	0.102	3.39263e-25
Rps12-ps3	3.74747e-68	1.2375	0.328	0.197	8.88862e-64				4930545L23Rik	6.35265e-24	-1.01261	0.057	0.112	1.50679e-19
Rhob	2.20101e-67	2.28456	0.133	0.037	5.22059e-63				C8a	2.84424e-17	-1.10252	0.101	0.152	6.74625e-13
Taf1c	3.97315e-67	1.10706	0.402	0.274	9.42391e-63
Vwa5a	4.32882e-67	1.30052	0.296	0.165	1.02675e-62
Nkain2	5.06254e-67	1.16856	0.582	0.518	1.20078e-62
Cep112	8.40013e-67	1.18241	0.324	0.188	1.99243e-62
Tmcc3	5.72983e-66	1.04221	0.459	0.34	1.35906e-61
Slc38a2	5.98196e-66	1.21561	0.322	0.191	1.41886e-61
Cttnbp2nl	1.03612e-64	1.37705	0.25	0.125	2.45757e-60
Psma1	1.99419e-64	1.06584	0.375	0.244	4.73002e-60
Pycard	2.29227e-64	2.71784	0.106	0.023	5.43702e-60
Ywhah	7.76209e-64	1.63474	0.207	0.093	1.84109e-59
Mdfic	1.32566e-63	1.19061	0.257	0.13	3.14434e-59
Fmnl2	1.69342e-63	1.43119	0.278	0.152	4.01663e-59
Rnf180	3.38052e-63	2.45716	0.114	0.028	8.01826e-59
Psma5	3.89504e-62	1.30144	0.29	0.167	9.23865e-58
Psmb5	9.09184e-62	1.35346	0.288	0.166	2.15649e-57
Casp7	1.08018e-61	1.10197	0.305	0.176	2.56209e-57
Alpk1	1.78916e-61	2.1055	0.13	0.039	4.24372e-57
F3	2.38116e-61	1.39935	0.252	0.131	5.64786e-57
E2f3	1.81219e-60	1.30427	0.261	0.139	4.29833e-56
Twsg1	2.37975e-60	1.51121	0.199	0.088	5.64452e-56
Tpm4	1.19055e-59	2.04478	0.141	0.047	2.82386e-55
Ccdc30	1.28912e-59	1.23197	0.299	0.176	3.05767e-55
Cmtm7	1.59243e-58	2.46038	0.105	0.025	3.77708e-54
Myl12a	2.50538e-58	1.42102	0.24	0.126	5.9425e-54
Eif1a	1.51103e-57	1.30249	0.27	0.154	3.584e-53
Acsl5	7.40484e-57	1.46833	0.194	0.087	1.75635e-52
Nlrc4	1.25062e-56	1.07248	0.378	0.264	2.96634e-52
Grn	4.25214e-56	1.29779	0.267	0.151	1.00856e-51
Mgst1	4.94887e-56	1.39414	0.242	0.13	1.17382e-51
Trim6	6.29541e-56	2.45965	0.101	0.025	1.49321e-51
Ano9	9.19011e-56	1.87108	0.148	0.056	2.1798e-51
Acot9	1.11225e-55	1.35853	0.234	0.121	2.63816e-51
Kcnb1	1.52812e-55	2.10391	0.109	0.029	3.62454e-51
Tceal9	3.37478e-55	1.75055	0.167	0.07	8.00464e-51
Helz2	8.20619e-55	2.25055	0.102	0.025	1.94643e-50
Psma7	3.0604e-54	1.15863	0.309	0.193	7.25897e-50
Ubash3b	5.41239e-54	1.22988	0.287	0.17	1.28377e-49
H2afz	6.97124e-54	1.31463	0.279	0.168	1.65351e-49
Actn1	9.28667e-54	1.44054	0.216	0.109	2.2027e-49
Npas2	1.22068e-53	1.67574	0.153	0.06	2.89534e-49
Wipf1	2.91694e-53	1.35044	0.193	0.089	6.9187e-49
Cd9	3.68861e-53	1.49746	0.184	0.084	8.74902e-49
Zgrf1	4.36807e-53	2.28948	0.122	0.04	1.03606e-48
Npl	1.64018e-52	1.28584	0.265	0.152	3.89035e-48
Selenow	1.7178e-52	1.95332	0.139	0.052	4.07445e-48
Gda	2.24733e-52	1.82486	0.137	0.05	5.33043e-48
Lrriq1	2.67143e-52	1.81652	0.131	0.045	6.33637e-48
Gm26632	2.85095e-51	1.15042	0.321	0.209	6.76217e-47
Aida	4.99013e-51	1.4517	0.192	0.092	1.18361e-46
Ccng1	1.06075e-50	1.16625	0.282	0.172	2.51599e-46
Nipal2	1.24144e-50	1.02354	0.339	0.224	2.94457e-46
Tlr3	1.82915e-50	2.05227	0.109	0.032	4.33857e-46
Cds1	3.02373e-50	1.05255	0.337	0.226	7.172e-46
Crybg1	7.18963e-50	1.21533	0.26	0.151	1.70531e-45
Hprt	7.84317e-50	1.24743	0.26	0.152	1.86032e-45
Rgs6	1.49917e-49	1.79398	0.154	0.065	3.55589e-45
Apobec1	4.78989e-48	1.37164	0.178	0.083	1.13611e-43
Sparc	8.96359e-48	2.01213	0.112	0.036	2.12607e-43
Ccdc122	1.01931e-47	1.60506	0.137	0.053	2.41771e-43
Clu	1.34409e-47	1.13667	0.259	0.152	3.18804e-43
Dnm3	1.40199e-47	2.15909	0.118	0.041	3.32538e-43
Dbnl	2.10741e-47	1.46416	0.19	0.095	4.99856e-43
2310001H17Rik	2.62595e-47	1.10748	0.279	0.173	6.22849e-43
Tuba1b	3.57734e-47	1.56919	0.159	0.07	8.4851e-43
Tnfrsf1a	5.19481e-47	1.65751	0.15	0.064	1.23216e-42
Spns3	1.12862e-46	1.3165	0.163	0.072	2.67698e-42
Gmpr	1.54221e-46	1.17535	0.292	0.188	3.65798e-42
Rnf135	1.74809e-46	1.0895	0.299	0.193	4.14629e-42
Pdgfb	2.3925e-46	1.31696	0.189	0.093	5.67476e-42
Pnrc1	3.73995e-46	1.28264	0.237	0.137	8.87079e-42
Rps27l	4.34007e-46	1.05016	0.313	0.208	1.02942e-41
Gm2000	4.59189e-46	1.02923	0.304	0.197	1.08915e-41
Gm14964	4.7373e-46	1.51971	0.159	0.071	1.12364e-41
Kif6	7.73128e-46	1.52029	0.146	0.061	1.83378e-41
Fam129a	1.08312e-45	1.61576	0.14	0.057	2.56906e-41
Hs6st3	2.73536e-45	1.58647	0.141	0.058	6.488e-41
Casz1	3.50896e-45	1.56123	0.14	0.057	8.32291e-41
Hells	6.10594e-45	2.12105	0.122	0.046	1.44827e-40
Mrpl33	1.2227e-44	1.02905	0.297	0.192	2.90013e-40
Cfap65	3.92517e-44	1.68543	0.129	0.051	9.31011e-40
Leprotl1	4.58266e-44	1.54838	0.163	0.076	1.08696e-39
Fam163a	4.95266e-44	1.43818	0.153	0.067	1.17472e-39
Arntl	5.29366e-44	1.9536	0.126	0.05	1.2556e-39
Prrg1	6.42695e-44	1.42956	0.192	0.099	1.52441e-39
Eif5a	8.29543e-44	1.03034	0.327	0.229	1.96759e-39
Abracl	4.26771e-43	1.30298	0.214	0.119	1.01226e-38
Kars	5.97708e-43	1.61443	0.14	0.06	1.4177e-38
Wdtc1	9.5481e-43	1.13793	0.262	0.163	2.26471e-38
Bcam	1.13193e-41	1.51311	0.125	0.049	2.68483e-37
Trim26	1.34952e-41	1.05138	0.267	0.168	3.20093e-37
Mms22l	2.15917e-41	1.49082	0.168	0.083	5.12133e-37
Nfkbia	2.19116e-41	1.28931	0.184	0.094	5.19722e-37
Fsd1l	3.26838e-41	1.53507	0.125	0.05	7.75226e-37
Cldn1	3.68447e-41	1.3997	0.163	0.079	8.7392e-37
Car5b	2.44026e-40	1.17365	0.246	0.152	5.78806e-36
Arpc3	2.63832e-40	1.10389	0.272	0.177	6.25783e-36
Itpk1	2.86451e-40	1.0285	0.304	0.208	6.79432e-36
Pgd	3.59332e-40	1.22203	0.222	0.129	8.523e-36
Azin2	5.62651e-40	1.33238	0.197	0.109	1.33455e-35
Sh2d4b	6.94548e-40	1.91365	0.105	0.038	1.6474e-35
Atad2	6.98606e-40	2.27407	0.114	0.045	1.65702e-35
5730559C18Rik	9.47041e-40	1.37249	0.175	0.091	2.24629e-35
St14	1.70022e-39	1.80041	0.106	0.038	4.03276e-35
Ripk2	1.74834e-39	1.51314	0.183	0.098	4.14688e-35
Ucp2	2.91817e-39	1.54645	0.162	0.082	6.9216e-35
Setd7	4.95512e-39	1.62509	0.121	0.05	1.1753e-34
Katna1	6.41632e-39	1.21709	0.238	0.148	1.52189e-34
Mrpl54	1.09812e-38	1.3479	0.194	0.108	2.60464e-34
Sh3bp2	1.25506e-38	1.55334	0.144	0.067	2.97689e-34
Arpc1b	2.3557e-38	1.5006	0.152	0.074	5.58748e-34
Elob	3.03328e-38	1.17049	0.245	0.155	7.19464e-34
Stk32a	3.88656e-38	1.30522	0.165	0.083	9.21853e-34
Phf6	5.59958e-38	1.08458	0.222	0.131	1.32817e-33
Pkm	9.25809e-38	1.44259	0.162	0.083	2.19593e-33
Ogfr	1.23715e-37	1.71555	0.109	0.042	2.93439e-33
Akr1b10	1.52066e-37	1.05263	0.255	0.162	3.60685e-33
AC166344.1	2.34578e-37	1.56157	0.108	0.041	5.56395e-33
Cyb561	3.08596e-37	1.58212	0.118	0.049	7.3196e-33
Wars	6.11558e-37	1.43872	0.16	0.082	1.45055e-32
Rps6	6.54179e-37	1.04439	0.284	0.193	1.55165e-32
4930599N23Rik	6.96958e-37	1.56842	0.15	0.074	1.65312e-32
Sub1	1.23111e-36	1.1664	0.238	0.15	2.92007e-32
Rpn1	1.48819e-36	1.0015	0.291	0.201	3.52984e-32
Psmg4	1.84507e-36	1.54184	0.124	0.054	4.37632e-32
Irf9	2.04632e-36	1.30319	0.138	0.064	4.85368e-32
Pea15a	3.10385e-36	1.32844	0.155	0.078	7.36203e-32
Trim56	3.51348e-36	1.13232	0.206	0.119	8.33363e-32
Ctso	4.34346e-36	1.20769	0.187	0.104	1.03022e-31
Psmb4	4.36979e-36	1.19098	0.22	0.135	1.03647e-31
Akr1c20	4.87266e-36	1.72345	0.123	0.054	1.15575e-31
Sec61b	5.94764e-36	1.34912	0.191	0.109	1.41072e-31
Map3k21	1.30314e-35	1.10895	0.21	0.124	3.09092e-31
Arf5	5.50135e-35	1.08485	0.255	0.167	1.30487e-30
Eif6	6.5908e-35	1.20421	0.186	0.104	1.56327e-30
Gadd45g	1.05868e-34	1.34078	0.137	0.064	2.51109e-30
Gm28068	2.31633e-34	1.32152	0.161	0.084	5.49411e-30
Arhgap22	2.09816e-33	1.03592	0.253	0.168	4.97662e-29
Inpp1	2.97427e-33	1.2504	0.171	0.094	7.05468e-29
Syt1	3.08043e-33	1.27441	0.155	0.081	7.30648e-29
Vamp5	4.01557e-33	1.08667	0.191	0.11	9.52453e-29
Pcbp1	4.6184e-33	1.01697	0.251	0.166	1.09544e-28
Hnrnpab	5.63932e-33	1.03089	0.251	0.167	1.33759e-28
Ranbp1	7.6904e-33	1.30575	0.147	0.075	1.82409e-28
Tubb2a	1.30816e-32	1.37942	0.128	0.06	3.10282e-28
Ninj1	1.48121e-32	1.28743	0.171	0.096	3.51329e-28
Ppp4r4	1.62258e-32	1.42251	0.135	0.066	3.8486e-28
Pola1	1.6902e-32	1.17886	0.294	0.209	4.00898e-28
Dtx4	3.29783e-32	1.62656	0.102	0.042	7.82212e-28
1810037I17Rik	5.73704e-32	1.13226	0.216	0.136	1.36077e-27
Rpl12	6.96551e-32	1.26561	0.152	0.08	1.65215e-27
Eef1b2	7.21515e-32	1.104	0.22	0.14	1.71136e-27
Bax	9.35576e-32	1.1167	0.207	0.127	2.21909e-27
Mocos	1.1354e-31	1.40889	0.142	0.073	2.69304e-27
Irf2bpl	1.20438e-31	1.33962	0.148	0.077	2.85666e-27
Trim47	2.03577e-31	1.14089	0.165	0.09	4.82864e-27
Nek6	7.83942e-31	1.0288	0.216	0.136	1.85943e-26
Gm32857	8.5197e-31	1.47486	0.114	0.052	2.02079e-26
Cenpj	1.65302e-30	1.33138	0.138	0.07	3.92079e-26
Rmdn3	2.00535e-30	1.21336	0.166	0.093	4.75648e-26
Rpl36al	3.2819e-30	1.00773	0.244	0.165	7.78434e-26
Cyb5r3	6.23539e-30	1.11666	0.2	0.124	1.47897e-25
Triobp	1.21982e-29	1.46607	0.126	0.062	2.8933e-25
Sh3bp4	4.09842e-29	1.36457	0.133	0.068	9.72105e-25
Rps15a	5.13171e-29	1.20381	0.178	0.106	1.21719e-24
Trp63	5.19197e-29	1.62362	0.103	0.045	1.23148e-24
Rps18	5.68007e-29	1.49386	0.13	0.066	1.34725e-24
Mtmr7	1.48694e-28	1.44567	0.113	0.054	3.52688e-24
Nfatc2	1.51347e-28	1.3442	0.119	0.058	3.5898e-24
Nhp2	2.3551e-28	1.67516	0.101	0.045	5.58605e-24
Jpt1	2.93069e-28	1.31464	0.128	0.065	6.95129e-24
Nup93	3.33237e-28	1.09941	0.152	0.083	7.90405e-24
Sept4	8.16035e-28	1.5214	0.102	0.046	1.93555e-23
Sf3b5	9.26694e-28	1.34385	0.153	0.087	2.19803e-23
Gm8186	1.60503e-27	1.11091	0.174	0.104	3.80697e-23
Ftl1-ps1	1.72654e-27	1.11833	0.228	0.157	4.09519e-23
Pla2g5	2.70788e-27	1.28771	0.111	0.053	6.42283e-23
Snu13	2.99654e-27	1.29719	0.151	0.085	7.10749e-23
Banf1	4.14131e-27	1.51204	0.112	0.055	9.82276e-23
Eid1	5.02254e-27	1.30791	0.129	0.067	1.1913e-22
Ranbp17	6.53058e-27	1.17711	0.166	0.098	1.54899e-22
Rhoc	7.27989e-27	1.36359	0.119	0.06	1.72672e-22
Gm29337	7.77174e-27	1.43424	0.123	0.063	1.84338e-22
Cuedc1	7.83516e-27	1.34181	0.118	0.059	1.85842e-22
Arhgdia	1.0601e-26	1.04502	0.226	0.152	2.51446e-22
Ctla4	1.63311e-26	1.28778	0.141	0.078	3.87358e-22
Ankrd29	1.71226e-26	1.00929	0.167	0.098	4.06131e-22
Nova1	1.96057e-26	1.21712	0.111	0.054	4.65028e-22
Zmat3	2.35273e-26	1.10821	0.174	0.105	5.58044e-22
Ccdc25	3.8004e-26	1.04228	0.177	0.108	9.01416e-22
1700016D06Rik	4.11769e-26	1.03595	0.214	0.143	9.76676e-22
Tbrg1	6.07024e-26	1.14508	0.164	0.097	1.4398e-21
D8Ertd738e	8.51219e-26	1.04073	0.223	0.153	2.01901e-21
Slc31a2	1.63433e-25	1.32792	0.116	0.059	3.87646e-21
Shisa5	2.54057e-25	1.18721	0.173	0.107	6.02598e-21
Pinx1	3.5561e-25	1.13597	0.141	0.078	8.43472e-21
Bbs12	4.32203e-25	1.07842	0.169	0.104	1.02514e-20
Creb3	5.42715e-25	1.37119	0.121	0.063	1.28727e-20
Gm10076	5.97754e-25	1.07527	0.19	0.122	1.41781e-20
Kcnh1	6.10556e-25	1.11098	0.134	0.073	1.44818e-20
Zfp239	9.86332e-25	1.38699	0.105	0.051	2.33948e-20
Gm14820	1.7878e-24	1.1003	0.184	0.119	4.24048e-20
Snrpd2	3.20049e-24	1.05231	0.201	0.134	7.59124e-20
Srxn1	3.8435e-24	1.23643	0.119	0.063	9.1164e-20
Pfn2	5.2672e-24	1.28939	0.132	0.074	1.24933e-19
Topbp1	5.70926e-24	1.07581	0.171	0.106	1.35418e-19
Sorcs1	8.52363e-24	1.16989	0.323	0.261	2.02172e-19
Slc30a1	8.85544e-24	1.0031	0.221	0.154	2.10042e-19
Capn1	1.33657e-23	1.30894	0.108	0.054	3.17021e-19
Nubp1	1.49796e-23	1.15316	0.136	0.077	3.55302e-19
Snn	5.00618e-23	1.16529	0.14	0.081	1.18742e-18
Dnah2	5.56036e-23	1.24829	0.114	0.06	1.31886e-18
Gca	5.99955e-23	1.3061	0.106	0.053	1.42303e-18
Npc2	6.1936e-23	1.0271	0.204	0.139	1.46906e-18
Traf3ip2	1.96508e-22	1.12838	0.142	0.083	4.66097e-18
Aif1l	2.99909e-22	1.03989	0.17	0.109	7.11354e-18
Junb	8.56419e-22	1.05781	0.144	0.086	2.03134e-17
Zpld1	9.93104e-22	1.26201	0.111	0.059	2.35554e-17
Pappa	1.93367e-21	1.25029	0.138	0.082	4.58648e-17
Kif24	4.15437e-21	1.18311	0.155	0.098	9.85376e-17
Srp14	4.16956e-21	1.12101	0.178	0.119	9.88977e-17
Nenf	7.71904e-21	1.09663	0.155	0.098	1.83088e-16
Itm2c	8.66539e-21	1.11498	0.128	0.074	2.05534e-16
Bcat1	9.18596e-21	1.03323	0.14	0.084	2.17882e-16
Cytip	2.11927e-20	1.14543	0.119	0.067	5.0267e-16
Mif4gd	3.89205e-20	1.04104	0.151	0.095	9.23156e-16
Zc3h12b	4.80839e-20	1.27427	0.107	0.059	1.1405e-15
Srl	8.33954e-20	1.24108	0.103	0.055	1.97806e-15
Gm40271	9.90691e-20	1.0097	0.196	0.138	2.34982e-15
Hsd11b1	1.17758e-19	1.25025	0.103	0.056	2.7931e-15
Tipin	2.14769e-19	1.00843	0.147	0.092	5.09412e-15
Gm11099	3.23989e-19	1.21739	0.105	0.058	7.68468e-15
Platr25	3.58519e-19	1.12078	0.123	0.072	8.5037e-15
Selenom	5.12467e-19	1.14913	0.137	0.085	1.21552e-14
Ulk4	6.14377e-19	1.07557	0.145	0.092	1.45724e-14
Tmem160	7.20363e-19	1.23638	0.129	0.079	1.70863e-14
Kcnk2	1.68034e-18	1.0101	0.154	0.1	3.98561e-14
Vasp	1.74899e-18	1.21804	0.103	0.057	4.14843e-14
Plagl2	2.11747e-17	1.04429	0.117	0.07	5.02244e-13
Anxa6	3.69979e-17	1.17198	0.12	0.074	8.77552e-13
Rab32	7.41046e-17	1.15461	0.101	0.057	1.75769e-12
Ifngr2	1.17637e-16	1.03034	0.105	0.06	2.79024e-12
Abca13	1.24201e-16	1.12591	0.206	0.152	2.94592e-12
Atad5	1.26037e-16	1.06352	0.119	0.073	2.98948e-12
Dnmt1	1.35088e-16	1.03199	0.11	0.065	3.20416e-12
6330562C20Rik	2.34843e-16	1.02131	0.111	0.066	5.57024e-12
Ezh2	2.60949e-16	1.0683	0.164	0.113	6.18944e-12
Pprc1	8.32524e-16	1.01728	0.114	0.07	1.97466e-11
Npdc1	8.35002e-16	1.06877	0.103	0.061	1.98054e-11
Rnf31	8.92357e-16	1.00673	0.126	0.08	2.11658e-11
Mrpl35	1.21416e-15	1.15118	0.114	0.07	2.87987e-11
Optn	2.35372e-14	1.02464	0.108	0.067	5.5828e-10
Hmgb3	2.59228e-14	1.03949	0.131	0.087	6.14863e-10
Plpp2	6.65953e-14	1.1217	0.104	0.065	1.57957e-09
C130026I21Rik	7.53685e-14	1.09617	0.113	0.073	1.78767e-09
Cd151	2.66569e-13	1.11427	0.11	0.071	6.32274e-09
Lsm3	5.03307e-13	1.1094	0.103	0.066	1.19379e-08
Rex1bd	1.25037e-12	1.00475	0.132	0.092	2.96576e-08
Dut	1.26995e-12	1.08068	0.102	0.065	3.0122e-08
Mrpl17	1.55488e-12	1.03198	0.123	0.084	3.68802e-08
Arrb1	1.23287e-11	1.04217	0.115	0.078	2.92425e-07
Guk1	2.92338e-11	1.05448	0.112	0.077	6.93395e-07
Elof1	5.35539e-11	1.04344	0.109	0.074	1.27025e-06
Tenm4	1.56308e-09	1.11438	0.128	0.095	3.70747e-05
Cenpp	1.63592e-08	1.09617	0.127	0.095	0.000388023
Sdk1	4.92469e-08	1.33311	0.14	0.111	0.00116809

## Sheet: tL.bl6.to.bc
Table S2: Results from differential gene expression TCMR vs. Control
Differential expression was assessed using two-sided Wilcoxon rank-sum tests with Benjamini–Hochberg correction for multiple testing.
Thin limbs			*This Fold Change was calculated between [C57BL/6 to BALB/c ] and [C57BL/6 to C57BL/6]
Gene upr.	p_val	avg_log2FC*	pct.1	pct.2	p_val_adj				Gene downr.	p_val	avg_log2FC*	pct.1	pct.2	p_val_adj
H2-K1	1.84724e-11	4.13966	1	0.625	4.38146e-07				Gm26870	5.73854e-34	-6.53279	0.006	0.562	1.36112e-29	Blck6_tL
Cd74	6.76173e-11	6.87295	0.969	0.062	1.60382e-06				Acaa1b	2.16534e-20	-5.08261	0.013	0.438	5.13598e-16	Blck6_tL
B2m	1.0564e-10	3.92396	0.984	0.375	2.50567e-06				Slc13a3	8.53973e-19	-4.9026	0.016	0.438	2.02554e-14	Blck6_tL
H2-D1	1.78072e-10	3.67671	0.987	0.5	4.22369e-06				Gm10801	9.26808e-15	-7.26624	0	0.188	2.1983e-10	Blck6_tL
Iigp1	2.79708e-10	6.06703	0.953	0.125	6.63439e-06				Aspdh	9.26808e-15	-6.22108	0	0.188	2.1983e-10	Blck6_tL
Stat1	1.0959e-09	4.72778	0.925	0.188	2.59935e-05				Gm6878	9.26808e-15	-7.12418	0	0.188	2.1983e-10	Blck6_tL
Ly6e	1.87852e-09	5.02293	0.915	0.062	4.45566e-05				Nat8f1	4.43528e-14	-3.41659	0.05	0.562	1.052e-09	Blck6_tL
Gbp2	3.49181e-09	7.0884	0.881	0.062	8.28222e-05				Slc34a1	7.18549e-14	-3.88559	0.15	0.875	1.70433e-09	Blck6_tL
Ly6a	4.43394e-09	4.30498	0.915	0.375	0.000105169				Dnah11	8.91759e-14	-4.20716	0.019	0.375	2.11516e-09	Blck6_tL
Irgm1	3.30627e-08	3.95674	0.859	0.188	0.000784214				Slc22a8	4.36621e-13	-5.12974	0.013	0.312	1.03562e-08	Blck6_tL
Chd9	2.40647e-07	1.83267	1	1	0.0057079				Cyp4a10	6.17893e-13	-4.25512	0.013	0.312	1.46558e-08	Blck6_tL
H2-Ab1	4.22352e-07	5.87643	0.74	0	0.0100178				Slc5a11	9.00941e-13	-4.84752	0.006	0.25	2.13694e-08	Blck6_tL
Psmb8	5.4998e-07	5.21843	0.749	0.062	0.013045				Ddc	9.79654e-13	-4.85475	0.006	0.25	2.32364e-08	Blck6_tL
H2-Aa	7.70834e-07	5.87195	0.721	0	0.0182834				Rdh16f2	4.07558e-11	-6.41773	0.003	0.188	9.66686e-07	Blck6_tL
H2-Eb1	1.06588e-06	4.01108	0.762	0.125	0.0252816				Dmgdh	4.07558e-11	-5.3368	0.003	0.188	9.66686e-07	Blck6_tL
Tmsb4x	1.27645e-06	2.34639	0.94	0.5	0.0302761				Cckar	4.48068e-11	-4.58933	0.003	0.188	1.06277e-06	Blck6_tL
Zfp981	1.59085e-06	4.08574	0.774	0.188	0.0377333				Ttr	4.48068e-11	-4.50929	0.003	0.188	1.06277e-06	Blck6_tL
Gbp7	1.83859e-06	5.97385	0.693	0	0.0436094				Epor	5.75161e-11	-4.64757	0.009	0.25	1.36423e-06	Blck6_tL
									Nat8f3	6.63424e-11	-4.53076	0.009	0.25	1.57358e-06	Blck6_tL
									Col27a1	8.8148e-11	-3.66424	0.009	0.25	2.09078e-06	Blck6_tL
									Svep1	2.71564e-10	-7.37128	0	0.125	6.44123e-06	Blck6_tL
									Gm36011	2.71564e-10	-5.87801	0	0.125	6.44123e-06	Blck6_tL
									Gm39033	2.71564e-10	-7.72115	0	0.125	6.44123e-06	Blck6_tL
									Cyp2e1	2.71564e-10	-5.87801	0	0.125	6.44123e-06	Blck6_tL
									Glt8d2	2.71564e-10	-6.16236	0	0.125	6.44123e-06	Blck6_tL
									A930009A15Rik	2.71564e-10	-6.30723	0	0.125	6.44123e-06	Blck6_tL
									Fitm1	2.71564e-10	-6.37967	0	0.125	6.44123e-06	Blck6_tL
									Nr2e3	2.71564e-10	-7.48874	0	0.125	6.44123e-06	Blck6_tL
									Apom	2.71564e-10	-6.42775	0	0.125	6.44123e-06	Blck6_tL
									Trpt1	2.71564e-10	-5.86932	0	0.125	6.44123e-06	Blck6_tL
									Slc22a19	2.71564e-10	-6.42775	0	0.125	6.44123e-06	Blck6_tL
									Slc22a1	3.0568e-10	-3.84697	0.031	0.375	7.25043e-06	Blck6_tL
									Bhmt2	8.17668e-10	-4.23794	0.022	0.312	1.93943e-05	Blck6_tL
									Esam	9.00622e-10	-2.77813	0.044	0.438	2.13619e-05	Blck6_tL
									Gas1	9.67262e-10	-3.28175	0.063	0.5	2.29425e-05	Blck6_tL
									4930579G18Rik	1.74643e-09	-3.2061	0.034	0.375	4.14237e-05	Blck6_tL
									Pck1	4.5881e-09	-3.53609	0.069	0.5	0.000108825	Blck6_tL
									Pla2g5	6.3911e-09	-4.51406	0.006	0.188	0.00015159	Blck6_tL
									Smkr-ps	7.42583e-09	-3.86684	0.006	0.188	0.000176133	Blck6_tL
									Gm16618	7.42583e-09	-3.82361	0.006	0.188	0.000176133	Blck6_tL
									Slc22a7	7.42583e-09	-3.76681	0.006	0.188	0.000176133	Blck6_tL
									Pank1	1.20883e-08	-2.67901	0.119	0.625	0.000286723	Blck6_tL
									Ndrg4	2.16367e-08	-3.49068	0.103	0.562	0.000513201	Blck6_tL
									Acsm2	2.21786e-08	-3.48906	0.078	0.5	0.000526053	Blck6_tL
									Flvcr2	2.44989e-08	-3.44616	0.016	0.25	0.00058109	Blck6_tL
									Lamtor2	2.80581e-08	-1.82191	0.21	0.812	0.000665511	Blck6_tL
									Zmynd12	2.80644e-08	-2.78998	0.041	0.375	0.000665659	Blck6_tL
									Pxmp2	4.39449e-08	-3.27158	0.028	0.312	0.00104233	Blck6_tL
									Wfdc15b	5.42917e-08	-2.93603	0.06	0.438	0.00128774	Blck6_tL
									Plpp4	6.00146e-08	-2.99713	0.082	0.5	0.00142349	Blck6_tL
									Gpam	7.11962e-08	-2.19175	0.041	0.375	0.0016887	Blck6_tL
									Hagh	1.23101e-07	-2.51519	0.163	0.688	0.00291983	Blck6_tL
									Lrp2	1.33053e-07	-3.12195	0.138	0.625	0.00315588	Blck6_tL
									Cd59b	1.39512e-07	-2.37826	0.11	0.562	0.00330908	Blck6_tL
									Fbp1	1.43756e-07	-3.03564	0.047	0.375	0.00340975	Blck6_tL
									Hsd3b3	1.46867e-07	-5.33249	0.009	0.188	0.00348353	Blck6_tL
									Gldc	1.46867e-07	-4.56486	0.009	0.188	0.00348353	Blck6_tL
									Kap	1.47249e-07	-2.23135	0.881	1	0.00349261	Blck6_tL
									mt-Cytb	1.50996e-07	-1.87153	0.408	0.938	0.00358148	Blck6_tL
									mt-Nd4	1.8634e-07	-1.90014	0.683	0.938	0.00441979	Blck6_tL
									Gprc5b	1.88448e-07	-4.49774	0.009	0.188	0.00446979	Blck6_tL
									Tm7sf2	1.88448e-07	-3.86348	0.009	0.188	0.00446979	Blck6_tL
									Akr7a5	2.09591e-07	-2.47228	0.113	0.562	0.00497128	Blck6_tL
									Gm14320	2.26885e-07	-3.02841	0.009	0.188	0.00538149	Blck6_tL
									Scn8a	2.26885e-07	-3.63955	0.009	0.188	0.00538149	Blck6_tL
									Lrrc19	2.75092e-07	-2.34172	0.085	0.5	0.0065249	Blck6_tL
									Sptssb	2.86158e-07	-3.87151	0.053	0.375	0.00678738	Blck6_tL
									mt-Nd6	3.57331e-07	-2.10984	0.047	0.375	0.00847555	Blck6_tL
									Acsm1	3.65522e-07	-3.20313	0.034	0.312	0.00866981	Blck6_tL
									Pax2	4.21352e-07	-1.53314	0.831	1	0.00999404	Blck6_tL
									Vmn1r20	4.42356e-07	-5.57631	0.003	0.125	0.0104923	Blck6_tL
									C330002G04Rik	4.42356e-07	-6.49799	0.003	0.125	0.0104923	Blck6_tL
									C8a	4.81472e-07	-5.02028	0.003	0.125	0.01142	Blck6_tL
									Ptger2	4.81472e-07	-5.34831	0.003	0.125	0.01142	Blck6_tL
									9130604C24Rik	5.23914e-07	-3.73058	0.003	0.125	0.0124267	Blck6_tL
									Uroc1	5.23914e-07	-4.65892	0.003	0.125	0.0124267	Blck6_tL
									Pde3a	5.23914e-07	-4.47421	0.003	0.125	0.0124267	Blck6_tL
									Btbd11	5.23914e-07	-4.35947	0.003	0.125	0.0124267	Blck6_tL
									Nsg2	5.23914e-07	-2.76734	0.003	0.125	0.0124267	Blck6_tL
									Npas3	5.23914e-07	-4.3595	0.003	0.125	0.0124267	Blck6_tL
									Cndp1	5.23914e-07	-4.54839	0.003	0.125	0.0124267	Blck6_tL
									2700089I24Rik	5.23914e-07	-4.75576	0.003	0.125	0.0124267	Blck6_tL
									Miox	5.52679e-07	-2.2954	0.116	0.562	0.013109	Blck6_tL
									Endog	6.00411e-07	-3.43657	0.022	0.25	0.0142411	Blck6_tL
									0610005C13Rik	6.16833e-07	-2.82411	0.034	0.312	0.0146307	Blck6_tL
									mt-Nd2	6.59845e-07	-1.74307	0.643	1	0.0156509	Blck6_tL
									Chpf	6.85667e-07	-3.23025	0.022	0.25	0.0162633	Blck6_tL
									Vldlr	1.02879e-06	-1.97014	0.266	0.812	0.0244018	Blck6_tL
									Ass1	1.03989e-06	-2.48447	0.129	0.562	0.0246652	Blck6_tL
									Selenos	1.5546e-06	-2.18024	0.122	0.562	0.0368734	Blck6_tL
									Ppp1r1b	1.91936e-06	-3.81688	0.013	0.188	0.0455253	Blck6_tL
									Scd1	2.08775e-06	-3.30588	0.025	0.25	0.0495193	Blck6_tL

## Sheet: tL.bc.to.bl6
Table S2: Results from differential gene expression TCMR vs. Control
Differential expression was assessed using two-sided Wilcoxon rank-sum tests with Benjamini–Hochberg correction for multiple testing.
Thin limbs			*This Fold Change was calculated between [BALB/c to C57BL/6 ] and [BALB/c to BALB/c]
Gene upr.	p_val	avg_log2FC*	pct.1	pct.2	p_val_adj				Gene downr.	p_val	avg_log2FC*	pct.1	pct.2	p_val_adj
Cd74	4.83985e-72	5.781	0.973	0.099	1.14796e-67				Gm26870	1.84183e-45	-4.86331	0.031	0.656	4.36865e-41
B2m	6.45149e-72	4.63964	0.988	0.276	1.53023e-67				Malat1	7.8179e-33	-1.20289	1	1	1.85433e-28
H2-K1	2.88992e-69	4.30532	0.984	0.365	6.8546e-65				Fxyd2	5.76666e-19	-1.02187	0.946	0.99	1.36779e-14
H2-D1	1.1004e-68	3.75139	0.992	0.526	2.61004e-64				Nme7	6.00648e-18	-1.24231	0.584	0.87	1.42468e-13
Iigp1	4.24379e-65	6.76136	0.899	0.026	1.00658e-60				Gm26804	5.19756e-15	-1.18002	0.751	0.88	1.23281e-10
Ly6a	6.72799e-56	4.73184	0.86	0.104	1.59581e-51				Dnm3	5.7729e-14	-1.28569	0.56	0.833	1.36928e-09
Stat1	6.505e-51	4.60286	0.829	0.141	1.54292e-46				Hnrnpr	2.03656e-13	-1.22145	0.77	0.906	4.83052e-09
Irgm1	1.5981e-48	4.6582	0.786	0.089	3.79054e-44				Pcx	2.55765e-13	-1.65687	0.241	0.583	6.0665e-09
Gbp2b	2.39353e-47	6.08286	0.755	0.068	5.67722e-43				Dtnbos	3.66192e-12	-1.67957	0.152	0.458	8.68572e-08
H2-Ab1	1.15885e-45	6.86658	0.704	0.016	2.74869e-41				Rufy2	1.27175e-11	-1.31088	0.218	0.536	3.01646e-07
Psmb8	5.97973e-45	5.75108	0.712	0.031	1.41833e-40				Slc34a1	2.2844e-11	-1.05206	0.191	0.526	5.41836e-07
H2-Aa	5.98084e-44	6.55795	0.685	0.01	1.4186e-39				Fam196a	2.36769e-11	-1.51196	0.218	0.505	5.61593e-07
H2-Eb1	2.81185e-41	6.45442	0.658	0.016	6.66943e-37				Ndrg4	5.59484e-11	-1.86799	0.23	0.484	1.32704e-06
Spp1	1.07781e-39	1.77796	1	0.672	2.55645e-35				Zfp511	6.05843e-11	-2.12908	0.058	0.286	1.437e-06
Ly6e	3.46395e-37	5.0418	0.646	0.057	8.21614e-33				Miox	7.16907e-11	-1.50836	0.14	0.432	1.70043e-06
Irgm2	4.68076e-37	4.84563	0.654	0.062	1.11023e-32				Dnah11	8.36507e-11	-2.25692	0.109	0.354	1.98411e-06
Tmsb4x	1.73801e-36	2.18621	0.93	0.547	4.12238e-32				Eps8l1	1.43686e-10	-1.36019	0.257	0.547	3.40809e-06
Tnfsf10	4.7582e-36	3.24432	0.755	0.208	1.1286e-31				Gm14546	1.648e-10	-2.27142	0.109	0.349	3.9089e-06
Ubd	3.36798e-35	8.94921	0.568	0	7.98851e-31				Gm15347	1.83296e-10	-2.49424	0.07	0.292	4.34759e-06
Gbp7	4.08615e-33	4.97779	0.595	0.047	9.69193e-29				Cd59b	2.72782e-10	-1.82071	0.086	0.323	6.47012e-06
Tapbp	2.09999e-31	2.2585	0.798	0.38	4.98097e-27				Gm11536	3.85607e-10	-1.66392	0.105	0.354	9.14622e-06
Gbp2	2.60835e-29	5.61444	0.525	0.026	6.18674e-25				Gm47350	4.41959e-10	-2.91733	0.031	0.219	1.04828e-05
Olfr56	8.7754e-29	5.40892	0.521	0.026	2.08144e-24				Gm26776	1.55483e-09	-3.55055	0.012	0.167	3.6879e-05
Parp14	2.00413e-28	3.99195	0.599	0.109	4.75361e-24				Xylt1	2.13322e-09	-1.56547	0.237	0.484	5.05978e-05
Tap2	1.01432e-27	4.98818	0.521	0.047	2.40587e-23				Gm15640	2.6716e-09	-2.28549	0.035	0.219	6.33678e-05
H2-T23	1.04284e-27	3.73584	0.572	0.078	2.4735e-23				Gm19705	2.69088e-09	-2.54075	0.031	0.208	6.3825e-05
Tap1	1.50045e-25	4.96246	0.479	0.026	3.55892e-21				Gm26669	2.72103e-09	-1.85385	0.089	0.312	6.45401e-05
Psmb9	5.2641e-25	5.43806	0.471	0.031	1.24859e-20				Lrrc4	4.32426e-09	-1.70822	0.23	0.474	0.000102567
Irf1	2.53876e-24	3.78176	0.529	0.083	6.02167e-20				Gpc5	4.5117e-09	-2.21952	0.082	0.297	0.000107013
Nlrc5	1.98803e-23	3.70621	0.494	0.057	4.71542e-19				Xbp1	4.60008e-09	-1.00095	0.436	0.667	0.000109109
Ifitm3	2.56881e-23	4.27409	0.475	0.047	6.09295e-19				A430090L17Rik	4.63446e-09	-2.00487	0.117	0.339	0.000109925
H2-Q4	5.04009e-22	4.02487	0.459	0.047	1.19546e-17				Gm31763	4.63668e-09	-1.07579	0.233	0.5	0.000109977
Tmem176b	1.13244e-21	1.44671	0.883	0.641	2.68604e-17				Lysmd4	6.02662e-09	-1.60144	0.163	0.396	0.000142945
Fth1	1.49319e-21	1.16213	0.961	0.839	3.54171e-17				Cpne2	6.41965e-09	-1.44918	0.14	0.391	0.000152268
AW112010	1.58263e-21	5.72736	0.397	0.01	3.75384e-17				Abcc5	7.89481e-09	-1.12941	0.28	0.547	0.000187257
Gm4951	1.9198e-21	8.40841	0.377	0	4.55356e-17				Hspa1b	8.26687e-09	-1.15716	0.584	0.755	0.000196082
Gbp3	4.58764e-21	4.89151	0.401	0.016	1.08814e-16				Peli2	1.02463e-08	-1.30301	0.319	0.578	0.000243032
Bst2	6.84712e-21	4.59183	0.412	0.026	1.62407e-16				Cnnm1	1.65338e-08	-1.26474	0.268	0.516	0.000392165
Cd52	2.77015e-20	5.75819	0.377	0.01	6.57052e-16				Gm38304	1.85792e-08	-2.32386	0.051	0.229	0.000440681
Tmem176a	8.83012e-20	1.38052	0.883	0.646	2.09442e-15				Pdcd4	2.22978e-08	-1.04768	0.28	0.557	0.000528882
Actb	1.22393e-19	1.23358	0.938	0.745	2.90304e-15				Dnase1	2.30153e-08	-3.6238	0.016	0.156	0.000545899
Rnf213	7.08561e-19	2.49081	0.611	0.24	1.68064e-14				Zfp973	2.51436e-08	-1.15794	0.171	0.427	0.000596381
Cxcl10	1.74477e-18	6.05068	0.342	0.005	4.13842e-14				Gm15738	2.62762e-08	-1.30657	0.171	0.411	0.000623246
Stat2	1.91706e-18	3.18709	0.479	0.115	4.54707e-14				Gm15261	2.63718e-08	-1.97367	0.132	0.339	0.000625514
mt-Co1	4.155e-18	1.08179	0.911	0.688	9.85525e-14				Ampd3	2.83641e-08	-1.04991	0.362	0.62	0.000672768
Gm16685	3.11542e-17	4.58923	0.381	0.047	7.38946e-13				Galm	3.05026e-08	-1.59213	0.296	0.526	0.000723491
Psmb10	1.66838e-16	3.59433	0.385	0.057	3.95724e-12				Ypel3	3.53415e-08	-1.11409	0.226	0.479	0.000838266
Ifi44	3.69952e-16	4.722	0.331	0.021	8.77489e-12				Sema4b	3.9607e-08	-1.04148	0.327	0.589	0.000939439
Napsa	4.16868e-16	1.27752	0.821	0.542	9.88769e-12				Trmt10a	4.12937e-08	-2.28489	0.035	0.198	0.000979446
H2-T22	4.3981e-16	3.28679	0.401	0.068	1.04319e-11				Sptssb	4.46338e-08	-2.01315	0.163	0.365	0.00105867
Oasl2	7.31162e-16	6.75593	0.296	0.005	1.73424e-11				Csad	5.23496e-08	-1.07048	0.226	0.49	0.00124168
Parp9	7.78523e-16	2.73324	0.479	0.141	1.84658e-11				Gm28379	5.34223e-08	-2.65949	0.019	0.161	0.00126712
Lyz2	8.40423e-16	4.85712	0.307	0.01	1.9934e-11				Itgb3bp	6.16066e-08	-1.135	0.179	0.422	0.00146125
Cd274	1.81797e-15	4.71127	0.327	0.026	4.31204e-11				Plk5	6.64694e-08	-4.92016	0.004	0.12	0.00157659
Gbp8	3.04013e-15	7.46106	0.276	0	7.21089e-11				Cln3	6.87713e-08	-1.76133	0.089	0.286	0.00163119
Gm12185	7.96661e-15	5.54007	0.288	0.01	1.8896e-10				Gm12146	7.21366e-08	-3.09498	0.023	0.167	0.00171101
F830016B08Rik	8.55142e-15	8.10508	0.268	0	2.02831e-10				Tox3	7.74928e-08	-3.19205	0.012	0.141	0.00183805
H2-Q7	1.08633e-14	4.91099	0.288	0.01	2.57666e-10				Rasal1	8.70134e-08	-1.49125	0.148	0.365	0.00206387
Plscr2	1.63455e-14	1.37964	0.724	0.458	3.877e-10				Tsga10	9.22762e-08	-1.96594	0.113	0.302	0.0021887
Lcn2	7.32865e-14	3.57281	0.327	0.042	1.73828e-09				Gucy2g	1.09897e-07	-2.63834	0.019	0.156	0.00260666
Tgtp2	2.9841e-13	7.15075	0.241	0	7.07799e-09				Phykpl	1.13685e-07	-1.54847	0.113	0.318	0.0026965
Ifit3	5.16267e-13	2.5574	0.451	0.161	1.22453e-08				Ccdc3	1.24521e-07	-2.63077	0.043	0.198	0.00295351
Herc6	1.01534e-12	2.57218	0.42	0.135	2.40829e-08				Gm6878	1.26231e-07	-3.81923	0.012	0.135	0.00299408
Vcam1	1.13353e-12	4.88043	0.253	0.01	2.68862e-08				Sgk1	1.45271e-07	-1.4719	0.327	0.521	0.00344568
Tmem140	1.35809e-12	3.5564	0.311	0.047	3.22126e-08				Gm31224	1.58141e-07	-1.39268	0.171	0.391	0.00375095
Dcdc2a	1.88246e-12	1.55449	0.646	0.385	4.465e-08				Ank2	1.86019e-07	-1.64724	0.132	0.333	0.00441218
Msn	2.67011e-12	1.25053	0.716	0.516	6.33324e-08				Slco4a1	2.57356e-07	-1.03159	0.475	0.693	0.00610422
Susd1	3.32653e-12	2.1403	0.463	0.172	7.89021e-08				Ces1d	3.00044e-07	-2.5432	0.016	0.141	0.00711674
Rplp1	6.26126e-12	1.03493	0.829	0.62	1.48511e-07				Ppp1r1a	3.06881e-07	-1.93027	0.152	0.349	0.00727891
Irf7	6.93703e-12	4.56766	0.23	0.005	1.6454e-07				Rflna	3.3249e-07	-3.67474	0.008	0.12	0.00788634
mt-Co3	7.05802e-12	1.10583	0.829	0.672	1.67409e-07				Gm20395	3.41938e-07	-1.07193	0.198	0.432	0.00811043
Serping1	1.33613e-11	3.94137	0.245	0.016	3.16917e-07				4930557K07Rik	4.04989e-07	-1.15954	0.117	0.323	0.00960594
Pigr	1.51103e-11	3.40807	0.3	0.052	3.58402e-07				AC144408.3	4.13553e-07	-1.93486	0.074	0.245	0.00980905
Dbi	1.86317e-11	1.25393	0.735	0.505	4.41925e-07				Gsdme	5.34672e-07	-1.17036	0.163	0.385	0.0126819
Gm12216	3.79957e-11	4.59879	0.249	0.026	9.01221e-07				Abhd14b	5.3616e-07	-1.34926	0.156	0.365	0.0127172
Gm4841	4.00864e-11	7.26949	0.202	0	9.50809e-07				Pid1	6.089e-07	-2.82032	0.062	0.219	0.0144425
C1qb	6.47311e-11	6.67837	0.198	0	1.53536e-06				Gm47167	6.1197e-07	-1.30024	0.132	0.339	0.0145153
Itgb6	1.72018e-10	1.28682	0.615	0.365	4.0801e-06				Wnk4	6.55469e-07	-1.23943	0.109	0.302	0.0155471
Cp	1.81773e-10	1.54511	0.712	0.469	4.31148e-06				Gm38102	6.7004e-07	-2.02088	0.051	0.203	0.0158927
Adgrg3	2.40566e-10	1.8073	0.463	0.193	5.70597e-06				Tmem120b	7.89451e-07	-1.19544	0.167	0.38	0.018725
Ifi44l	2.70239e-10	4.0318	0.21	0.01	6.40979e-06				Atp10b	9.55772e-07	-2.08683	0.14	0.312	0.02267
C4b	2.70786e-10	4.41152	0.218	0.016	6.42277e-06				Gm44511	1.02658e-06	-1.01279	0.307	0.547	0.0243494
G3bp2	3.35269e-10	1.38204	0.619	0.38	7.95225e-06				Fbxl12	1.14308e-06	-1.28316	0.117	0.307	0.0271126
S100a10	4.51198e-10	1.60935	0.471	0.208	1.0702e-05				Iqcm	1.18007e-06	-3.22277	0.012	0.12	0.0279901
Plac8	6.12082e-10	5.74624	0.191	0.005	1.4518e-05				Gm12264	1.18035e-06	-2.45454	0.016	0.13	0.0279967
Cxcl9	6.90877e-10	6.49847	0.179	0	1.63869e-05				Cdkn2b	1.38134e-06	-1.76429	0.066	0.224	0.032764
Pla2g16	8.62587e-10	4.28421	0.218	0.021	2.04597e-05				Masp2	1.44279e-06	-2.83573	0.012	0.12	0.0342214
Dysf	9.11744e-10	1.36252	0.502	0.25	2.16257e-05				Far1os	1.50345e-06	-1.12137	0.117	0.312	0.0356603
Plau	9.25568e-10	1.29298	0.529	0.255	2.19535e-05				Lnx1	1.53086e-06	-2.32377	0.023	0.146	0.0363105
Ccl5	1.0204e-09	4.73351	0.206	0.016	2.42028e-05				Slc8a1	1.67039e-06	-2.36318	0.125	0.323	0.0396199
Dtx3l	1.33121e-09	4.06442	0.214	0.021	3.1575e-05				Cryab	2.03742e-06	-1.04173	0.895	0.943	0.0483256
Tinagl1	2.03593e-09	1.41129	0.615	0.38	4.82903e-05				Cdon	2.0753e-06	-1.68431	0.058	0.208	0.049224
Lars2	2.40148e-09	1.03108	0.696	0.49	5.69607e-05
Rpl27a	2.44774e-09	1.00414	0.774	0.599	5.80579e-05
Nfkbiz	3.00878e-09	2.18144	0.428	0.214	7.13653e-05
Serpina10	4.8313e-09	2.67072	0.249	0.047	0.000114594
Ciita	5.97362e-09	2.96954	0.233	0.036	0.000141688
Sh2d4b	8.38848e-09	3.59659	0.218	0.031	0.000198966
C3	8.41455e-09	3.63198	0.21	0.026	0.000199585
Isg15	9.12264e-09	3.56815	0.202	0.021	0.00021638
Patl2	1.17355e-08	3.4789	0.222	0.036	0.000278353
Psme1	1.21722e-08	1.9479	0.393	0.177	0.000288713
Mt1	1.28198e-08	2.07287	0.428	0.203	0.000304074
Ifi27	1.68915e-08	1.2774	0.607	0.432	0.000400649
Adamts1	1.91895e-08	2.39162	0.35	0.135	0.000455156
Sorbs2	2.10917e-08	2.01834	0.354	0.135	0.000500275
C1qa	2.61339e-08	5.40336	0.16	0.005	0.00061987
Csf1	3.81464e-08	2.6177	0.265	0.068	0.000904795
Erap1	3.86747e-08	1.98334	0.374	0.167	0.000917324
Tmsb10	4.77428e-08	1.37591	0.486	0.276	0.00113241
Rtp4	5.34205e-08	3.84069	0.175	0.016	0.00126708
Nmi	5.61515e-08	2.15791	0.272	0.073	0.00133186
Cadps2	6.18596e-08	1.69117	0.416	0.193	0.00146725
Stat3	6.24472e-08	1.18429	0.588	0.422	0.00148118
AU020206	7.1879e-08	4.70266	0.152	0.005	0.0017049
Mt2	8.92614e-08	4.18245	0.179	0.021	0.00211719
Icam1	8.99274e-08	4.03563	0.179	0.021	0.00213299
Parp10	9.30933e-08	2.33121	0.276	0.083	0.00220808
Clec2d	9.48461e-08	1.64694	0.44	0.224	0.00224965
Xaf1	1.09884e-07	3.75784	0.187	0.026	0.00260634
Tsc22d1	1.11607e-07	1.13296	0.588	0.411	0.00264719
Il18bp	1.18965e-07	4.39497	0.167	0.016	0.00282172
Hbb-bs	1.30724e-07	2.02036	0.16	0.01	0.00310064
H2-Q6	1.62287e-07	5.1236	0.144	0.005	0.00384929
H2-DMb1	1.69267e-07	6.04183	0.132	0	0.00401484
Epsti1	2.03867e-07	4.01714	0.163	0.016	0.00483552
Gm44148	2.11327e-07	2.45343	0.292	0.104	0.00501246
Pfn1	2.59859e-07	1.05695	0.626	0.469	0.0061636
Serpinb9	3.09152e-07	2.65942	0.245	0.068	0.00733278
Samhd1	3.36235e-07	2.32458	0.3	0.109	0.00797515
Rnf19b	3.54593e-07	1.45815	0.49	0.302	0.00841058
Ppp4r4	4.02803e-07	1.71484	0.381	0.177	0.00955408
Gbp5	4.13815e-07	6.46947	0.125	0	0.00981528
Calr	4.52627e-07	1.04065	0.642	0.5	0.0107359
Ctsb	5.13204e-07	1.23675	0.482	0.281	0.0121727
Clu	5.16171e-07	1.74065	0.405	0.224	0.0122431
Rpl29	5.46302e-07	3.74302	0.156	0.016	0.0129577
Tgm2	5.82021e-07	2.28423	0.288	0.109	0.0138049
Cd14	7.35492e-07	2.43558	0.195	0.036	0.0174451
Idnk	9.39052e-07	1.68496	0.296	0.109	0.0222734
Trim12c	9.58351e-07	1.58648	0.389	0.198	0.0227311
Zbp1	9.73538e-07	5.50129	0.128	0.005	0.0230913
Socs1	9.97253e-07	3.09859	0.171	0.026	0.0236539
Flnb	1.10042e-06	1.00969	0.638	0.51	0.0261009
Tapbpl	1.11632e-06	2.99742	0.152	0.016	0.026478
Apoe	1.27908e-06	1.39986	0.381	0.188	0.0303386
H2-DMa	1.4174e-06	3.43237	0.148	0.016	0.0336194
Ifit1	1.43399e-06	3.71276	0.156	0.021	0.0340129
Fem1c	1.55307e-06	1.17655	0.444	0.245	0.0368372
H2-DMb2	1.56439e-06	5.85033	0.113	0	0.0371057
Slc14a2	1.6356e-06	2.95772	0.257	0.089	0.0387948
Hist1h2bc	1.78161e-06	1.31446	0.494	0.328	0.042258

## Sheet: TAL.bl6.to.bc
Table S2: Results from differential gene expression TCMR vs. Control
Differential expression was assessed using two-sided Wilcoxon rank-sum tests with Benjamini–Hochberg correction for multiple testing.
Thick ascending limbs			*This Fold Change was calculated between [C57BL/6 to BALB/c ] and [C57BL/6 to C57BL/6]
Gene upr.	p_val	avg_log2FC*	pct.1	pct.2	p_val_adj				Gene downr.	p_val	avg_log2FC*	pct.1	pct.2	p_val_adj
B2m	0	4.66509	0.977	0.234	0				Kap	3.08499e-291	-2.54559	0.844	1	7.31729e-287	Blck6_TAL
H2-K1	0	3.9148	0.997	0.456	0				Egf	4.56579e-288	-4.29629	0.518	0.977	1.08296e-283	Blck6_TAL
Chd9	0	3.45421	0.999	0.876	0				mt-Nd2	3.99398e-287	-2.56265	0.61	0.994	9.47332e-283	Blck6_TAL
Spp1	0	3.0454	1	0.959	0				mt-Nd4	1.01588e-255	-2.26937	0.708	0.992	2.40956e-251	Blck6_TAL
H2-D1	5.57754e-298	4.28545	0.96	0.219	1.32294e-293				Slc34a1	4.95559e-254	-3.28279	0.133	0.755	1.17542e-249	Blck6_TAL
Iigp1	5.53252e-280	7.17847	0.904	0.035	1.31226e-275				Lpl	1.48354e-247	-2.89434	0.211	0.839	3.5188e-243	Blck6_TAL
Cd74	4.25435e-279	5.98566	0.911	0.064	1.00909e-274				mt-Atp6	1.10559e-242	-2.08574	0.794	0.998	2.62235e-238	Blck6_TAL
Zfp981	5.72891e-268	6.01089	0.898	0.121	1.35884e-263				Gm26870	4.27956e-241	-3.5117	0.029	0.504	1.01507e-236	Blck6_TAL
Ly6e	2.39526e-250	4.31641	0.89	0.145	5.68132e-246				mt-Cytb	2.54717e-231	-2.44977	0.491	0.953	6.04164e-227	Blck6_TAL
Stat1	1.12071e-232	4.41651	0.862	0.115	2.65821e-228				Slc16a7	1.71542e-224	-2.04028	0.723	0.979	4.06881e-220	Blck6_TAL
Gbp2	4.40832e-229	6.49974	0.809	0.017	1.04561e-224				Wfdc15b	6.38202e-217	-2.77585	0.27	0.842	1.51375e-212	Blck6_TAL
Tmsb4x	2.84159e-217	4.3349	0.873	0.233	6.73997e-213				Gm47708	4.26702e-209	-4.05184	0.031	0.462	1.01209e-204	Blck6_TAL
Irgm1	3.06868e-205	4.43057	0.799	0.103	7.2786e-201				Dst	8.40026e-205	-1.33547	0.936	0.995	1.99246e-200	Blck6_TAL
Lcn2	4.41917e-204	5.98396	0.766	0.037	1.04818e-199				mt-Co2	8.22666e-202	-1.94502	0.733	0.992	1.95128e-197	Blck6_TAL
H2-Q7	2.91602e-186	8.64897	0.705	0.003	6.9165e-182				mt-Nd3	2.69179e-201	-3.38583	0.094	0.597	6.38466e-197	Blck6_TAL
Gm20663	1.2693e-168	4.38571	0.732	0.109	3.01065e-164				mt-Co3	1.0972e-192	-1.73299	0.745	0.985	2.60244e-188	Blck6_TAL
Irgm2	3.83651e-161	4.70668	0.688	0.058	9.09983e-157				Slc12a1	2.1777e-188	-1.12048	0.977	1	5.16529e-184	Blck6_TAL
Psmb8	3.44059e-160	6.53086	0.653	0.018	8.16072e-156				Gm42418	2.2492e-186	-1.05062	0.999	1	5.33489e-182	Blck6_TAL
Gbp7	1.82339e-153	4.37171	0.667	0.046	4.3249e-149				P3h2	1.73726e-185	-1.46101	0.858	0.995	4.1206e-181	Blck6_TAL
H2-Aa	6.65806e-147	5.65707	0.63	0.028	1.57923e-142				Miox	8.84033e-184	-3.11496	0.076	0.55	2.09684e-179	Blck6_TAL
H2-Ab1	1.90932e-144	4.89691	0.639	0.046	4.52871e-140				Lrrc66	6.13613e-183	-2.48764	0.207	0.746	1.45543e-178	Blck6_TAL
Gm42031	9.33793e-144	5.54096	0.635	0.058	2.21486e-139				Plekha6	1.55474e-182	-1.89068	0.584	0.951	3.68768e-178	Blck6_TAL
Clec2d	5.28843e-143	2.12547	0.85	0.498	1.25436e-138				Ppp1r1a	2.30514e-182	-1.80924	0.5	0.954	5.46755e-178	Blck6_TAL
Atp11a	1.71273e-140	2.65592	0.796	0.391	4.06242e-136				Atp1a1	1.8158e-178	-1.16065	0.98	0.998	4.3069e-174	Blck6_TAL
Ubd	5.97629e-140	10.6772	0.586	0	1.41752e-135				mt-Nd1	1.5706e-157	-1.87063	0.46	0.902	3.72531e-153	Blck6_TAL
Ly6a	3.00792e-133	1.42978	0.958	0.825	7.1345e-129				Dusp15	9.52369e-152	-3.21001	0.061	0.453	2.25893e-147	Blck6_TAL
Nlrc5	1.3576e-132	4.50391	0.609	0.043	3.2201e-128				Sord	5.52863e-151	-2.63432	0.133	0.597	1.31134e-146	Blck6_TAL
Tnfsf10	2.57916e-132	2.07736	0.839	0.478	6.11752e-128				Lrp2	1.998e-148	-2.87636	0.089	0.515	4.73905e-144	Blck6_TAL
Clu	1.82516e-130	3.39112	0.666	0.127	4.32909e-126				Oxct1	1.74604e-145	-1.2882	0.765	0.98	4.14143e-141	Blck6_TAL
Gm4951	3.29784e-125	6.49296	0.559	0.014	7.82215e-121				Gpx6	1.31424e-142	-4.15777	0.023	0.328	3.11724e-138	Blck6_TAL
H2-Eb1	1.24867e-123	4.59557	0.585	0.043	2.96171e-119				Tef	3.35856e-142	-2.20487	0.223	0.697	7.96616e-138	Blck6_TAL
H2-Q4	3.53986e-123	6.06396	0.554	0.017	8.3962e-119				Akr1c21	1.93537e-137	-2.74288	0.085	0.489	4.59051e-133	Blck6_TAL
Irf1	4.72934e-121	4.78142	0.573	0.041	1.12175e-116				Tom1l2	1.97662e-135	-1.49862	0.698	0.942	4.68834e-131	Blck6_TAL
Tsc22d1	3.86202e-120	1.97336	0.817	0.502	9.16032e-116				Bckdhb	2.45843e-135	-1.39612	0.776	0.965	5.83115e-131	Blck6_TAL
Parp14	2.74199e-119	4.50065	0.575	0.046	6.50372e-115				Slc22a8	3.88522e-135	-4.85613	0.008	0.26	9.21535e-131	Blck6_TAL
H2-Q6	6.58978e-119	6.64638	0.532	0.006	1.56303e-114				Mfsd4a	1.17172e-133	-1.6361	0.455	0.876	2.77921e-129	Blck6_TAL
Vmp1	7.71197e-114	1.62303	0.876	0.64	1.8292e-109				mt-Co1	2.18405e-132	-1.31692	0.776	0.985	5.18036e-128	Blck6_TAL
Naaladl2	6.93686e-113	1.6366	0.891	0.573	1.64535e-108				Acsm2	9.58845e-132	-3.04311	0.07	0.441	2.27428e-127	Blck6_TAL
Gm16685	1.82761e-111	1.3244	0.933	0.757	4.33492e-107				Umod	2.49417e-131	-1.21536	0.974	0.995	5.91591e-127	Blck6_TAL
H2-T23	9.16862e-111	3.99405	0.567	0.07	2.17471e-106				mt-Nd5	3.7705e-131	-1.94766	0.247	0.723	8.94325e-127	Blck6_TAL
Olfr56	1.88216e-110	6.14351	0.514	0.014	4.4643e-106				Robo3	2.0136e-129	-5.4589	0.008	0.251	4.77605e-125	Blck6_TAL
Dcdc2a	1.70742e-108	4.32483	0.545	0.047	4.04982e-104				Dbp	1.88273e-127	-2.88414	0.064	0.418	4.46565e-123	Blck6_TAL
Gbp3	5.30506e-107	4.91582	0.516	0.021	1.25831e-102				Cmss1	3.1746e-127	-1.0038	0.916	0.991	7.52984e-123	Blck6_TAL
Gclc	8.28739e-103	3.22225	0.774	0.504	1.96569e-98				Aldob	4.28953e-127	-1.88324	0.344	0.81	1.01743e-122	Blck6_TAL
AW112010	3.55419e-101	7.99852	0.472	0.003	8.43019e-97				mt-Nd4l	1.49522e-124	-2.33887	0.172	0.6	3.54651e-120	Blck6_TAL
Adamts1	2.72623e-98	5.27994	0.492	0.031	6.46634e-94				Nat8f1	5.06989e-124	-3.20257	0.05	0.378	1.20253e-119	Blck6_TAL
Tap1	1.08819e-97	4.55866	0.496	0.032	2.58107e-93				Gm42962	2.50847e-123	-3.12304	0.048	0.374	5.94984e-119	Blck6_TAL
Psmb9	6.1367e-97	5.13557	0.479	0.02	1.45556e-92				Ptger3	2.74971e-122	-1.79243	0.604	0.874	6.52203e-118	Blck6_TAL
Lyz2	7.77461e-97	6.44473	0.463	0.006	1.84406e-92				Slc22a4	2.50149e-121	-1.78599	0.349	0.784	5.93328e-117	Blck6_TAL
Pigr	7.09577e-96	3.43198	0.542	0.086	1.68305e-91				Pah	1.5092e-118	-3.05555	0.048	0.364	3.57966e-114	Blck6_TAL
Apoe	2.60926e-94	2.85771	0.622	0.182	6.1889e-90				Cpeb3	3.11863e-117	-1.0864	0.811	0.975	7.39709e-113	Blck6_TAL
Ifitm3	1.14705e-93	4.13684	0.498	0.046	2.72069e-89				Ppargc1b	1.27975e-114	-1.62209	0.383	0.809	3.03543e-110	Blck6_TAL
Stat3	5.89913e-93	1.46812	0.818	0.553	1.39922e-88				Gm42697	2.22189e-114	-2.77855	0.065	0.397	5.27011e-110	Blck6_TAL
Akt3	2.52633e-92	2.6216	0.605	0.152	5.9922e-88				Rdh16f2	4.29654e-111	-5.31894	0.004	0.204	1.0191e-106	Blck6_TAL
F830016B08Rik	3.19765e-92	4.30257	0.461	0.012	7.5845e-88				Ralyl	3.14753e-110	-2.12565	0.211	0.626	7.46562e-106	Blck6_TAL
Cd274	5.70075e-92	4.16892	0.488	0.044	1.35216e-87				Thrb	1.3693e-109	-1.19724	0.709	0.954	3.24785e-105	Blck6_TAL
Spns2	9.84004e-92	3.52596	0.538	0.096	2.33396e-87				Stxbp4	3.4636e-108	-1.33609	0.643	0.914	8.2153e-104	Blck6_TAL
Nfkbiz	8.33759e-91	2.6761	0.616	0.205	1.97759e-86				Fut9	1.03387e-107	-2.33042	0.111	0.489	2.45224e-103	Blck6_TAL
Tmsb10	1.29683e-90	4.14026	0.489	0.049	3.07596e-86				Cdkl1	1.11593e-106	-1.18782	0.67	0.949	2.64688e-102	Blck6_TAL
Cxcl10	3.8439e-90	5.4342	0.453	0.017	9.11734e-86				Dock8	1.84464e-106	-1.19396	0.753	0.959	4.37531e-102	Blck6_TAL
Oasl2	4.05331e-87	4.30628	0.443	0.015	9.61404e-83				Rap1gap	6.50899e-106	-1.607	0.386	0.784	1.54387e-101	Blck6_TAL
Ccl5	1.28601e-86	7.3807	0.426	0.006	3.05029e-82				Tmem27	5.86351e-103	-1.89008	0.183	0.6	1.39077e-98	Blck6_TAL
Serping1	4.7037e-81	6.54496	0.406	0.006	1.11567e-76				Pex5l	6.06964e-102	-3.09384	0.052	0.342	1.43966e-97	Blck6_TAL
Stat2	8.62781e-81	2.49896	0.558	0.144	2.04643e-76				6330410L21Rik	1.78508e-100	-3.61761	0.026	0.266	4.23402e-96	Blck6_TAL
Adgrg3	3.77458e-80	2.94941	0.528	0.118	8.95293e-76				Car4	1.96062e-99	-2.3644	0.091	0.429	4.65041e-95	Blck6_TAL
Defb1	2.14193e-79	2.2226	0.796	0.599	5.08044e-75				Nckap5	3.40494e-99	-1.17755	0.682	0.937	8.07619e-95	Blck6_TAL
Syt2	3.20649e-79	5.03371	0.421	0.023	7.60548e-75				Ckb	6.10595e-99	-1.96596	0.294	0.689	1.44827e-94	Blck6_TAL
AC135964.2	7.28491e-79	4.404	0.455	0.057	1.72791e-74				Cox6c	1.18578e-98	-1.54058	0.497	0.847	2.81255e-94	Blck6_TAL
Herc6	2.0798e-78	2.94751	0.511	0.109	4.93309e-74				Ass1	2.27973e-98	-2.22874	0.123	0.481	5.40728e-94	Blck6_TAL
Gm12185	4.23889e-77	5.05635	0.399	0.009	1.00542e-72				Afm	2.42634e-98	-2.92371	0.048	0.325	5.75503e-94	Blck6_TAL
Rnf213	7.2351e-76	2.13667	0.637	0.292	1.71609e-71				Cyp4a10	2.63779e-96	-4.13272	0.014	0.221	6.25657e-92	Blck6_TAL
Cd52	4.26353e-75	5.53192	0.394	0.014	1.01127e-70				Ryr2	3.50736e-95	-2.93449	0.05	0.323	8.3191e-91	Blck6_TAL
Tap2	6.90788e-74	2.88018	0.496	0.109	1.63848e-69				Pcyt2	1.1789e-94	-1.5152	0.359	0.755	2.79624e-90	Blck6_TAL
Flnb	2.82653e-72	1.52109	0.757	0.511	6.70424e-68				Ccnd1	2.09306e-92	-1.91522	0.202	0.583	4.96452e-88	Blck6_TAL
Dysf	9.19572e-72	1.67326	0.711	0.383	2.18113e-67				Lnx1	4.08507e-92	-1.13979	0.646	0.916	9.68938e-88	Blck6_TAL
Sat1	1.48106e-70	1.63838	0.805	0.639	3.51293e-66				Tmem116	3.46601e-90	-1.1657	0.624	0.917	8.22102e-86	Blck6_TAL
S100a11	2.9465e-70	1.6852	0.69	0.371	6.98879e-66				Mep1a	5.4786e-89	-2.33499	0.081	0.387	1.29947e-84	Blck6_TAL
Tfcp2l1	5.6459e-69	1.23036	0.875	0.764	1.33915e-64				Tcn2	1.23954e-88	-1.72528	0.224	0.608	2.94006e-84	Blck6_TAL
Itga6	2.5119e-67	1.55134	0.768	0.533	5.95798e-63				Gm33543	1.5942e-88	-3.08027	0.035	0.274	3.78129e-84	Blck6_TAL
Plac8	5.03583e-66	5.13795	0.359	0.012	1.19445e-61				Fads6	2.13788e-87	-1.72202	0.235	0.611	5.07083e-83	Blck6_TAL
Bst2	1.79296e-65	3.73644	0.394	0.04	4.25272e-61				mt-Atp8	7.90177e-86	-2.3958	0.071	0.355	1.87422e-81	Blck6_TAL
Camk2b	2.11162e-63	3.96268	0.425	0.083	5.00856e-59				0610005C13Rik	1.11348e-85	-2.57988	0.068	0.346	2.64107e-81	Blck6_TAL
Tapbp	3.20689e-63	2.0404	0.574	0.245	7.60642e-59				Gatm	1.605e-85	-2.09636	0.092	0.409	3.8069e-81	Blck6_TAL
Gm4841	1.34145e-62	6.6576	0.332	0.005	3.18177e-58				Tbxas1	5.54675e-85	-1.96131	0.18	0.534	1.31563e-80	Blck6_TAL
Sh3bgrl3	5.06288e-62	3.04396	0.444	0.101	1.20086e-57				Fbp1	5.57581e-83	-2.34049	0.063	0.335	1.32253e-78	Blck6_TAL
Parp9	1.60005e-61	2.65805	0.459	0.115	3.79516e-57				Ugt3a1	2.64653e-82	-4.68496	0.005	0.161	6.2773e-78	Blck6_TAL
Gbp8	3.00782e-60	7.66454	0.32	0.003	7.13425e-56				Fgf9	5.04561e-82	-2.11335	0.226	0.571	1.19677e-77	Blck6_TAL
H2-T22	6.6313e-60	3.0124	0.412	0.075	1.57288e-55				Erc2	1.02961e-81	-1.36779	0.514	0.83	2.44213e-77	Blck6_TAL
Ddx58	2.94004e-58	2.38646	0.458	0.119	6.97349e-54				Ipcef1	1.11724e-81	-2.03794	0.172	0.508	2.64998e-77	Blck6_TAL
Il34	1.35781e-57	1.33026	0.75	0.493	3.22059e-53				Atp5b	4.26569e-81	-1.05449	0.748	0.939	1.01178e-76	Blck6_TAL
Arg2	3.09628e-57	3.88894	0.359	0.04	7.34408e-53				Ddo	1.01653e-80	-1.1041	0.638	0.897	2.41111e-76	Blck6_TAL
Kctd1	3.19645e-57	1.16102	0.929	0.887	7.58167e-53				Fa2h	1.0272e-79	-1.52435	0.33	0.694	2.43641e-75	Blck6_TAL
Tgm2	2.42645e-56	3.31685	0.392	0.069	5.75529e-52				Slc2a13	5.0697e-79	-1.55368	0.525	0.809	1.20248e-74	Blck6_TAL
Gm12216	3.66604e-56	1.86996	0.547	0.217	8.69548e-52				Wnk4	1.17911e-78	-1.16639	0.497	0.833	2.79673e-74	Blck6_TAL
Col18a1	9.92719e-56	2.10974	0.538	0.234	2.35463e-51				Tmem207	3.76775e-78	-2.8417	0.146	0.444	8.93673e-74	Blck6_TAL
Rps20	9.31577e-54	1.23488	0.76	0.562	2.20961e-49				Sult1c2	5.45839e-78	-2.45676	0.056	0.308	1.29468e-73	Blck6_TAL
Socs2	3.23526e-53	2.24069	0.53	0.234	7.67372e-49				Kl	2.92411e-77	-1.56002	0.268	0.634	6.93569e-73	Blck6_TAL
Vcam1	1.49045e-52	6.98352	0.285	0.002	3.5352e-48				Dnah11	3.24521e-76	-2.44203	0.065	0.32	7.69732e-72	Blck6_TAL
Ubb	3.35759e-52	1.16548	0.774	0.551	7.96387e-48				Keg1	3.46849e-76	-2.04557	0.131	0.444	8.22691e-72	Blck6_TAL
Atp6v0d2	6.879e-52	3.5624	0.338	0.04	1.63163e-47				Rgs6	4.42249e-76	-1.00119	0.841	0.968	1.04897e-71	Blck6_TAL
Fkbp5	8.45724e-52	2.35767	0.592	0.355	2.00597e-47				1110019B22Rik	1.02574e-75	-3.07278	0.033	0.245	2.43295e-71	Blck6_TAL
Zbtb16	9.52621e-52	2.26029	0.509	0.225	2.25952e-47				Ttr	1.42598e-74	-4.14193	0.008	0.162	3.38227e-70	Blck6_TAL
Ptbp3	1.21145e-51	1.37552	0.702	0.493	2.87343e-47				Acacb	1.05141e-73	-1.30094	0.416	0.753	2.49384e-69	Blck6_TAL
Ehf	2.98629e-51	1.84671	0.543	0.248	7.08319e-47				Gm49272	1.62672e-73	-2.28801	0.066	0.322	3.85842e-69	Blck6_TAL
Tgtp2	3.90881e-51	8.78182	0.276	0	9.27132e-47				Ranbp3l	2.13497e-73	-1.48113	0.454	0.767	5.06394e-69	Blck6_TAL
Gvin1	6.02866e-51	4.46567	0.3	0.017	1.42994e-46				Fam81a	2.42631e-73	-1.97779	0.121	0.423	5.75498e-69	Blck6_TAL
Sh2d4b	1.17605e-50	5.41747	0.296	0.015	2.78947e-46				Ano4	3.09043e-73	-2.2257	0.205	0.516	7.33019e-69	Blck6_TAL
Lgals3	7.52002e-50	1.96143	0.542	0.259	1.78367e-45				Retsat	3.92397e-73	-2.55499	0.059	0.302	9.30727e-69	Blck6_TAL
Il7	8.83892e-50	2.37276	0.498	0.216	2.0965e-45				Sv2a	1.01524e-72	-1.6337	0.211	0.554	2.40805e-68	Blck6_TAL
Clic1	1.78428e-49	1.50247	0.631	0.371	4.23213e-45				Acadsb	1.0998e-72	-1.18394	0.509	0.822	2.60861e-68	Blck6_TAL
Cxcl9	5.50767e-49	9.0505	0.266	0	1.30636e-44				Pcsk6	1.36104e-72	-1.47383	0.414	0.734	3.22825e-68	Blck6_TAL
Trim12a	5.56589e-49	2.13841	0.464	0.167	1.32017e-44				Cabcoco1	1.43169e-72	-1.50589	0.346	0.685	3.39584e-68	Blck6_TAL
Elovl7	5.95616e-49	1.05013	0.786	0.646	1.41274e-44				Pdzrn4	1.61897e-72	-2.0992	0.096	0.377	3.84003e-68	Blck6_TAL
Snx10	7.03335e-49	4.12996	0.297	0.018	1.66824e-44				Ndufa4	1.70976e-72	-1.37139	0.477	0.783	4.05537e-68	Blck6_TAL
Tgfbr1	8.31655e-49	1.98675	0.606	0.378	1.9726e-44				Map2k6	1.63932e-71	-1.87809	0.138	0.446	3.8883e-67	Blck6_TAL
Xdh	2.77857e-48	5.13177	0.282	0.012	6.59049e-44				Chchd10	1.18677e-70	-1.16126	0.562	0.85	2.81491e-66	Blck6_TAL
Arap2	2.9267e-48	2.95244	0.349	0.058	6.94184e-44				Fnip2	2.22695e-70	-1.38697	0.474	0.767	5.2821e-66	Blck6_TAL
S100a6	7.09273e-48	2.82323	0.383	0.095	1.68232e-43				Ces1d	6.08889e-69	-3.49804	0.011	0.162	1.44422e-64	Blck6_TAL
Acsl4	1.76017e-47	1.84574	0.577	0.312	4.17494e-43				Atp5g1	8.56796e-69	-1.21684	0.509	0.816	2.03224e-64	Blck6_TAL
Psmb10	1.76261e-47	3.47459	0.323	0.044	4.18073e-43				Colgalt2	1.4123e-68	-1.60894	0.265	0.603	3.34983e-64	Blck6_TAL
Casp12	9.92024e-47	5.51408	0.265	0.006	2.35298e-42				Atp5a1	8.48974e-67	-1.01183	0.691	0.907	2.01368e-62	Blck6_TAL
Mapk4	1.25549e-46	2.91314	0.374	0.087	2.97789e-42				Sec62	2.12367e-66	-1.01168	0.579	0.858	5.03713e-62	Blck6_TAL
Psme1	6.26283e-44	2.00867	0.445	0.161	1.48548e-39				Pck1	2.69126e-66	-2.15556	0.079	0.329	6.3834e-62	Blck6_TAL
Zbp1	6.56445e-44	7.65515	0.244	0.002	1.55702e-39				Dnase1	4.60618e-66	-4.47028	0.008	0.144	1.09254e-61	Blck6_TAL
Gm4070	6.93902e-44	4.70499	0.266	0.015	1.64587e-39				Slc13a3	6.17278e-66	-3.4916	0.019	0.184	1.46412e-61	Blck6_TAL
Gbp5	2.38157e-43	5.71989	0.252	0.008	5.64884e-39				Cyp2a4	7.56463e-65	-3.56935	0.011	0.156	1.79426e-60	Blck6_TAL
Msn	6.55485e-43	1.63113	0.557	0.292	1.55475e-38				Cyp51	2.65765e-64	-2.35672	0.058	0.28	6.30368e-60	Blck6_TAL
Mmp7	8.19994e-43	9.6291	0.237	0	1.94494e-38				Egfl6	6.3646e-64	-1.51877	0.271	0.603	1.50962e-59	Blck6_TAL
Bnc2	1.71453e-42	2.71729	0.366	0.101	4.06669e-38				Slc22a12	8.8702e-64	-2.57904	0.037	0.233	2.10392e-59	Blck6_TAL
Kansl1l	1.81066e-42	1.05224	0.853	0.804	4.2947e-38				Atp5h	8.91812e-64	-1.43773	0.327	0.651	2.11529e-59	Blck6_TAL
Gm8439	2.45124e-42	3.74863	0.279	0.028	5.81409e-38				Ak4	1.22423e-63	-3.28074	0.013	0.162	2.90375e-59	Blck6_TAL
Rps29	3.15228e-42	1.11078	0.765	0.594	7.47689e-38				Fras1	3.92934e-63	-1.82384	0.146	0.432	9.31999e-59	Blck6_TAL
Gsr	4.83841e-42	1.74165	0.521	0.274	1.14762e-37				Adhfe1	1.01052e-62	-1.60099	0.182	0.485	2.39686e-58	Blck6_TAL
C3	4.9963e-42	4.96681	0.251	0.011	1.18507e-37				Idh2	1.07872e-62	-1.00656	0.512	0.819	2.55861e-58	Blck6_TAL
Ccdc148	7.16538e-42	1.41353	0.702	0.516	1.69956e-37				Sgk2	3.68926e-62	-1.34928	0.311	0.634	8.75056e-58	Blck6_TAL
Pla2g16	7.63148e-42	3.03846	0.315	0.057	1.81011e-37				Hao2	6.42555e-62	-1.70845	0.145	0.435	1.52408e-57	Blck6_TAL
Ctss	7.26953e-41	5.10672	0.247	0.012	1.72426e-36				Tgfbr3	6.84394e-62	-1.25922	0.371	0.7	1.62331e-57	Blck6_TAL
Nav2	2.22189e-40	1.08598	0.792	0.723	5.27011e-36				Bsnd	1.29975e-61	-1.57226	0.182	0.487	3.08288e-57	Blck6_TAL
S100a10	2.79634e-40	1.88835	0.468	0.202	6.63263e-36				Nr1d2	4.7779e-61	-1.25329	0.333	0.666	1.13327e-56	Blck6_TAL
Mylip	6.93554e-40	2.38828	0.374	0.113	1.64504e-35				Kcnt1	8.20252e-61	-1.5954	0.148	0.435	1.94556e-56	Blck6_TAL
Casp4	8.05863e-40	6.78316	0.227	0.003	1.91143e-35				Gm29266	1.20291e-60	-3.36119	0.023	0.187	2.85318e-56	Blck6_TAL
Nmi	1.37557e-39	2.08637	0.415	0.153	3.2627e-35				Casr	1.95357e-60	-1.34205	0.519	0.76	4.63368e-56	Blck6_TAL
Abca1	1.93676e-39	3.21715	0.283	0.04	4.59379e-35				Vegfa	6.33658e-60	-1.18675	0.386	0.695	1.50297e-55	Blck6_TAL
Ifi27	3.25494e-39	1.60648	0.495	0.231	7.7204e-35				Chst9	1.29222e-59	-1.03207	0.561	0.839	3.06501e-55	Blck6_TAL
Piezo1	4.28558e-39	1.19829	0.655	0.453	1.0165e-34				Cat	2.76666e-59	-1.49469	0.185	0.493	6.56224e-55	Blck6_TAL
Gm10073	6.93609e-39	1.23634	0.693	0.518	1.64517e-34				Scn4b	3.78906e-59	-2.71335	0.046	0.24	8.98727e-55	Blck6_TAL
Tacc2	1.4109e-38	1.62253	0.703	0.587	3.34651e-34				Mgst3	4.4523e-59	-1.35144	0.273	0.591	1.05604e-54	Blck6_TAL
Fbxw17	1.65292e-38	2.53264	0.308	0.057	3.92056e-34				Igf1	4.35176e-58	-3.16441	0.017	0.164	1.03219e-53	Blck6_TAL
Jun	3.98249e-38	2.28492	0.372	0.119	9.44607e-34				Klhl3	6.13762e-58	-1.71207	0.188	0.476	1.45578e-53	Blck6_TAL
Dtx3l	4.03466e-38	3.32005	0.28	0.044	9.56982e-34				Magi3	6.43884e-58	-1.24524	0.721	0.882	1.52723e-53	Blck6_TAL
Upp1	6.25398e-38	3.26682	0.293	0.055	1.48338e-33				Ugt3a2	6.58972e-58	-3.0395	0.021	0.176	1.56302e-53	Blck6_TAL
Samhd1	9.151e-38	2.05604	0.432	0.178	2.17052e-33				Mthfd1	7.06823e-58	-1.22076	0.39	0.7	1.67651e-53	Blck6_TAL
Cep85	9.32319e-38	1.96438	0.542	0.325	2.21137e-33				Papss2	7.29912e-58	-1.63051	0.168	0.456	1.73128e-53	Blck6_TAL
Fyb2	9.19204e-37	2.87236	0.305	0.069	2.18026e-32				Cox6b1	9.89919e-58	-1.169	0.509	0.778	2.34799e-53	Blck6_TAL
Zfp36l1	1.87187e-36	1.30436	0.68	0.528	4.4399e-32				Acat1	1.1273e-57	-1.09136	0.421	0.738	2.67383e-53	Blck6_TAL
Serpina10	2.59235e-36	3.79187	0.238	0.02	6.1488e-32				Pdzk1	1.76128e-57	-2.07705	0.068	0.289	4.17757e-53	Blck6_TAL
Osmr	3.30933e-36	4.08151	0.222	0.009	7.84941e-32				Rtl4	3.64323e-57	-3.43018	0.036	0.211	8.64138e-53	Blck6_TAL
Mylk	4.06645e-36	1.64794	0.572	0.366	9.64521e-32				Ces1f	1.20956e-56	-2.93092	0.017	0.162	2.86896e-52	Blck6_TAL
Rtn4	9.19171e-36	1.2771	0.674	0.496	2.18018e-31				Slc22a6	1.79427e-56	-2.32021	0.046	0.24	4.25582e-52	Blck6_TAL
Patl2	2.78289e-35	3.36179	0.252	0.032	6.60074e-31				Ndufb9	3.8991e-56	-1.31834	0.379	0.68	9.24827e-52	Blck6_TAL
Samd5	3.03514e-35	1.88662	0.429	0.184	7.19906e-31				Irs1	4.11255e-56	-1.26985	0.33	0.639	9.75455e-52	Blck6_TAL
Tinagl1	3.97291e-35	2.54287	0.344	0.11	9.42335e-31				Fmo1	6.97852e-56	-3.0118	0.017	0.159	1.65523e-51	Blck6_TAL
Astn2	4.35844e-35	3.6242	0.335	0.109	1.03378e-30				4732465J04Rik	1.47528e-55	-1.34426	0.318	0.62	3.49922e-51	Blck6_TAL
Sbno2	4.90978e-35	1.4929	0.516	0.283	1.16455e-30				Rph3a	4.81861e-55	-4.12735	0.006	0.121	1.14293e-50	Blck6_TAL
Gm47283	5.03648e-35	2.87312	0.272	0.046	1.1946e-30				Ppp1r1b	4.9645e-55	-1.6923	0.118	0.375	1.17753e-50	Blck6_TAL
Wsb1	6.60542e-35	1.21975	0.622	0.406	1.56674e-30				Fabp3	8.59968e-55	-1.50478	0.188	0.476	2.03976e-50	Blck6_TAL
Pdk4	1.06836e-34	3.14806	0.312	0.084	2.53404e-30				Prkd1	2.03741e-54	-1.60295	0.6	0.809	4.83253e-50	Blck6_TAL
Rasal2	1.0795e-34	1.31638	0.616	0.413	2.56048e-30				Gm44386	1.65553e-53	-2.00336	0.08	0.299	3.92675e-49	Blck6_TAL
Tspan14	1.42097e-34	1.59244	0.505	0.277	3.37039e-30				Dmtn	2.08188e-53	-1.01186	0.426	0.735	4.938e-49	Blck6_TAL
Kif23	1.67672e-34	2.37304	0.368	0.135	3.97701e-30				Gm19461	7.79651e-53	-1.64044	0.135	0.394	1.84925e-48	Blck6_TAL
Pea15a	2.08471e-34	2.24218	0.364	0.13	4.94473e-30				Trak2	8.40581e-53	-1.11453	0.433	0.718	1.99377e-48	Blck6_TAL
Smchd1	2.6214e-34	1.2328	0.691	0.556	6.2177e-30				Edar	1.60508e-52	-2.25519	0.067	0.273	3.8071e-48	Blck6_TAL
Cebpd	6.06116e-34	4.70452	0.214	0.012	1.43765e-29				Pla1a	7.23339e-52	-1.03478	0.414	0.715	1.71569e-47	Blck6_TAL
Ifi44	8.06014e-34	3.28287	0.237	0.026	1.91179e-29				Cnnm1	1.27455e-51	-1.49267	0.177	0.45	3.02311e-47	Blck6_TAL
Rpl27a	9.44615e-34	1.14184	0.655	0.455	2.24053e-29				Uqcr11	1.54394e-51	-1.32351	0.289	0.585	3.66208e-47	Blck6_TAL
Ly6c1	1.14606e-33	2.68017	0.296	0.072	2.71835e-29				Cyp4a14	6.98837e-51	-4.38131	0.007	0.115	1.65757e-46	Blck6_TAL
C1qa	1.52643e-33	4.46584	0.214	0.014	3.62053e-29				Scd1	3.97267e-50	-2.77137	0.026	0.175	9.42278e-46	Blck6_TAL
Ifit3	2.8409e-33	4.16625	0.226	0.023	6.73833e-29				Acaa1b	1.49666e-49	-2.58617	0.031	0.187	3.54993e-45	Blck6_TAL
Rasgrp1	3.79466e-33	1.44835	0.532	0.314	9.00055e-29				Spink1	1.71763e-49	-1.53709	0.188	0.458	4.07404e-45	Blck6_TAL
Vim	4.48983e-33	4.42154	0.212	0.014	1.06494e-28				Prox1	4.83241e-49	-1.46306	0.307	0.59	1.1462e-44	Blck6_TAL
Clic4	5.53452e-33	2.18938	0.387	0.158	1.31273e-28				Hmgcs1	1.7842e-48	-1.2646	0.305	0.591	4.23195e-44	Blck6_TAL
Rps27a	5.71805e-33	1.13751	0.664	0.466	1.35627e-28				Ppp2r2b	4.67089e-48	-1.1977	0.322	0.619	1.10789e-43	Blck6_TAL
Tspo	1.22582e-32	1.36485	0.527	0.299	2.90753e-28				Eci3	3.0352e-47	-3.53053	0.008	0.115	7.19918e-43	Blck6_TAL
Gm15347	1.2632e-32	3.63768	0.242	0.037	2.99619e-28				Pecr	3.66051e-47	-2.08488	0.058	0.243	8.68237e-43	Blck6_TAL
Rtp4	1.27276e-32	4.22917	0.21	0.014	3.01887e-28				Cyc1	1.32621e-46	-1.14981	0.34	0.625	3.14563e-42	Blck6_TAL
Rps24	1.41878e-32	1.00778	0.72	0.559	3.3652e-28				Igfbp4	2.05941e-46	-1.57144	0.11	0.338	4.88471e-42	Blck6_TAL
Rnf19a	1.49885e-32	1.14337	0.635	0.464	3.55511e-28				D10Jhu81e	4.94104e-46	-1.90715	0.068	0.26	1.17197e-41	Blck6_TAL
Batf2	4.0894e-32	5.25806	0.197	0.008	9.69966e-28				Fmc1	6.83286e-46	-1.53507	0.148	0.392	1.62069e-41	Blck6_TAL
Sorbs2	9.29564e-32	1.08036	0.73	0.59	2.20483e-27				Aadat	1.3428e-45	-2.20066	0.046	0.214	3.18499e-41	Blck6_TAL
C1qb	4.16551e-31	4.82178	0.194	0.009	9.88017e-27				Rasgef1b	2.55781e-45	-1.63923	0.155	0.397	6.06687e-41	Blck6_TAL
Irf7	4.53901e-31	3.80091	0.208	0.017	1.07661e-26				Gcgr	3.66954e-45	-1.4702	0.157	0.406	8.70378e-41	Blck6_TAL
Kcnh1	4.71018e-31	4.01027	0.2	0.012	1.11721e-26				Ggnbp1	6.03667e-45	-1.72103	0.103	0.317	1.43184e-40	Blck6_TAL
Icam1	7.31046e-31	4.49591	0.205	0.017	1.73397e-26				Ldlr	9.88939e-45	-1.9788	0.044	0.208	2.34566e-40	Blck6_TAL
Gm44148	8.68286e-31	2.63568	0.267	0.058	2.05949e-26				Khk	3.7375e-44	-1.68143	0.074	0.27	8.86497e-40	Blck6_TAL
Mt2	1.10101e-30	1.58477	0.497	0.282	2.61149e-26				1700028J19Rik	4.10652e-44	-1.47557	0.121	0.351	9.74025e-40	Blck6_TAL
Xaf1	1.12789e-30	3.33671	0.218	0.025	2.67523e-26				Slc6a17	5.53459e-44	-1.18793	0.262	0.536	1.31275e-39	Blck6_TAL
Kank3	2.78751e-30	3.69328	0.206	0.018	6.6117e-26				Fam107a	6.49201e-44	-1.8002	0.093	0.299	1.53984e-39	Blck6_TAL
Tmem252	3.76155e-30	3.2987	0.224	0.031	8.92203e-26				Kyat1	1.01043e-43	-1.13844	0.326	0.599	2.39663e-39	Blck6_TAL
Nupr1	1.46752e-29	3.0744	0.267	0.064	3.4808e-25				Tnfsf15	1.16711e-43	-2.82459	0.016	0.133	2.76828e-39	Blck6_TAL
Ccbe1	1.48528e-29	2.4759	0.305	0.093	3.52294e-25				Tenm4	1.199e-43	-1.47113	0.264	0.518	2.84391e-39	Blck6_TAL
Klf6	1.89505e-29	2.21374	0.332	0.121	4.49486e-25				Slc2a4	1.92012e-43	-1.9693	0.07	0.256	4.55433e-39	Blck6_TAL
Parp12	3.06739e-29	1.37343	0.459	0.24	7.27553e-25				Vldlr	8.40417e-43	-1.24726	0.232	0.498	1.99338e-38	Blck6_TAL
Socs1	4.14608e-29	5.39132	0.176	0.005	9.83409e-25				mt-Nd6	1.15306e-42	-2.07662	0.043	0.201	2.73494e-38	Blck6_TAL
Il18bp	4.3469e-29	3.05193	0.227	0.037	1.03104e-24				Cox7a2	1.52099e-42	-1.10662	0.423	0.685	3.60764e-38	Blck6_TAL
Rps5	4.38888e-29	1.19433	0.573	0.383	1.041e-24				Pank1	2.40906e-42	-1.00686	0.409	0.678	5.71405e-38	Blck6_TAL
Ifitm10	6.76101e-29	4.69391	0.176	0.005	1.60364e-24				Kcnn2	3.03016e-42	-1.3063	0.24	0.501	7.18724e-38	Blck6_TAL
Trim12c	8.95528e-29	2.20972	0.283	0.077	2.1241e-24				Clcnka	4.45365e-42	-1.06781	0.381	0.652	1.05636e-37	Blck6_TAL
Dynll1	2.00592e-28	1.9942	0.33	0.121	4.75785e-24				Ech1	6.17865e-42	-1.2278	0.214	0.47	1.46551e-37	Blck6_TAL
Thsd7a	3.05812e-28	4.1192	0.2	0.023	7.25356e-24				Kcnma1	6.76378e-42	-2.47469	0.077	0.257	1.6043e-37	Blck6_TAL
Ctps	5.89987e-28	2.10431	0.291	0.086	1.39939e-23				Hgd	1.26958e-41	-2.77818	0.026	0.156	3.01133e-37	Blck6_TAL
Samd4	6.73308e-28	1.99404	0.36	0.149	1.59702e-23				Pdk2	1.29578e-41	-1.25699	0.194	0.446	3.07346e-37	Blck6_TAL
Cd24a	2.09759e-27	1.11227	0.598	0.433	4.97528e-23				Miga2	5.10836e-41	-1.29745	0.178	0.421	1.21165e-36	Blck6_TAL
Arntl	2.6394e-27	4.61512	0.174	0.009	6.2604e-23				D3Ertd751e	1.53739e-40	-1.32555	0.185	0.429	3.64653e-36	Blck6_TAL
Trafd1	5.44995e-27	2.42788	0.259	0.067	1.29267e-22				Gm42650	2.61105e-40	-2.56535	0.024	0.15	6.19316e-36	Blck6_TAL
Vwa5a	9.70859e-27	1.79101	0.335	0.132	2.30278e-22				Ak3	2.80643e-40	-1.09048	0.277	0.545	6.65657e-36	Blck6_TAL
Parp10	1.05704e-26	1.75318	0.323	0.115	2.50718e-22				Adcy1	3.52519e-40	-1.17402	0.221	0.478	8.3614e-36	Blck6_TAL
Pfn1	1.5324e-26	1.31407	0.497	0.306	3.63471e-22				Acadm	3.775e-40	-1.04494	0.341	0.606	8.95392e-36	Blck6_TAL
Rps12-ps3	1.54831e-26	1.91773	0.338	0.138	3.67245e-22				Hadh	6.00407e-40	-1.39135	0.14	0.364	1.4241e-35	Blck6_TAL
Gm19684	2.17166e-26	4.36637	0.165	0.006	5.15095e-22				Sned1	6.40273e-40	-1.89525	0.093	0.283	1.51866e-35	Blck6_TAL
Arpc1b	2.78796e-26	2.05388	0.291	0.093	6.61277e-22				Slc5a2	7.29911e-40	-2.74474	0.028	0.158	1.73128e-35	Blck6_TAL
Rpl9-ps6	2.97653e-26	1.03601	0.669	0.528	7.06003e-22				C230037L18Rik	1.06156e-39	-1.59564	0.091	0.285	2.51792e-35	Blck6_TAL
Idnk	3.19131e-26	1.72472	0.346	0.142	7.56946e-22				Tmem86a	2.6461e-39	-2.84171	0.016	0.126	6.27628e-35	Blck6_TAL
Ehd4	3.56443e-26	2.31915	0.282	0.092	8.45447e-22				Gsta2	2.95293e-39	-2.38132	0.024	0.149	7.00406e-35	Blck6_TAL
Tyrobp	4.12087e-26	5.92364	0.157	0.003	9.77429e-22				Hlf	3.32273e-39	-1.94737	0.065	0.236	7.88119e-35	Blck6_TAL
Acsl5	4.29711e-26	1.3579	0.441	0.236	1.01923e-21				Cubn	3.48102e-39	-2.36852	0.034	0.172	8.25662e-35	Blck6_TAL
Susd1	7.27912e-26	3.33437	0.195	0.026	1.72653e-21				Bag1	6.58909e-39	-1.03806	0.327	0.591	1.56287e-34	Blck6_TAL
Ildr1	1.08093e-25	1.07421	0.565	0.387	2.56386e-21				Ndufb10	7.14766e-39	-1.13147	0.293	0.557	1.69535e-34	Blck6_TAL
Rps4x	1.30559e-25	1.08788	0.596	0.421	3.09674e-21				Gm47719	1.23322e-38	-2.13824	0.034	0.172	2.92507e-34	Blck6_TAL
Gm44511	1.31474e-25	1.31209	0.48	0.296	3.11842e-21				Atp5j2	1.53524e-38	-1.04388	0.433	0.674	3.64143e-34	Blck6_TAL
Rnf19b	1.66104e-25	2.48425	0.25	0.066	3.93982e-21				Abhd6	1.68275e-38	-1.05125	0.353	0.619	3.99132e-34	Blck6_TAL
Mt1	1.67549e-25	1.13717	0.775	0.73	3.9741e-21				4930481A15Rik	3.27044e-38	-1.59815	0.091	0.282	7.75716e-34	Blck6_TAL
St3gal1	2.01643e-25	4.52517	0.164	0.009	4.78276e-21				Ttc36	7.05295e-38	-1.1063	0.278	0.542	1.67289e-33	Blck6_TAL
Capn5	2.11462e-25	1.93879	0.318	0.124	5.01566e-21				Pcbd1	7.33499e-38	-1.36385	0.157	0.378	1.73979e-33	Blck6_TAL
Glipr2	2.11992e-25	4.54861	0.157	0.005	5.02825e-21				Gm42397	1.79767e-37	-3.13159	0.015	0.119	4.26391e-33	Blck6_TAL
Socs3	2.31124e-25	3.87686	0.172	0.014	5.48203e-21				Chchd6	1.84915e-37	-1.1877	0.269	0.513	4.38599e-33	Blck6_TAL
Lgals1	2.89733e-25	2.29676	0.27	0.086	6.87217e-21				Bmp7	4.64589e-37	-1.57553	0.097	0.288	1.10196e-32	Blck6_TAL
Mlkl	4.99219e-25	2.61962	0.192	0.026	1.1841e-20				Ugt2b38	5.3611e-37	-2.33736	0.027	0.152	1.2716e-32	Blck6_TAL
Havcr1	6.18603e-25	7.13698	0.147	0.002	1.46726e-20				Gm13111	1.03104e-36	-1.55422	0.11	0.305	2.44552e-32	Blck6_TAL
Erap1	7.70556e-25	1.75113	0.313	0.115	1.82768e-20				Pdk1	1.75182e-36	-1.21385	0.231	0.47	4.15513e-32	Blck6_TAL
Cacna1h	9.13585e-25	6.45698	0.147	0.002	2.16693e-20				Bckdha	2.39528e-36	-1.10406	0.266	0.519	5.68136e-32	Blck6_TAL
Ccl8	9.7929e-25	8.09227	0.144	0	2.32278e-20				Epcam	2.8203e-36	-1.05196	0.423	0.66	6.68946e-32	Blck6_TAL
Rpl18a	9.87593e-25	1.13467	0.515	0.315	2.34247e-20				Mgam	5.13328e-36	-2.24589	0.033	0.161	1.21756e-31	Blck6_TAL
Nsun7	1.43169e-24	1.93319	0.273	0.086	3.39582e-20				C920021L13Rik	9.26426e-36	-1.18663	0.218	0.453	2.19739e-31	Blck6_TAL
Fmnl2	2.43322e-24	1.0222	0.609	0.44	5.77136e-20				4930556J24Rik	9.6881e-36	-1.1921	0.285	0.531	2.29792e-31	Blck6_TAL
Adamts6	4.58684e-24	1.90229	0.314	0.126	1.08795e-19				Rida	1.38353e-35	-1.03467	0.378	0.619	3.2816e-31	Blck6_TAL
Pabpc1	2.94587e-23	1.19556	0.482	0.296	6.98731e-19				Acaa2	1.83358e-35	-1.19618	0.163	0.387	4.34908e-31	Blck6_TAL
Cstb	3.32301e-23	1.62447	0.356	0.17	7.88184e-19				Slc9a2	3.93889e-35	-1.80295	0.09	0.266	9.34266e-31	Blck6_TAL
Cerkl	4.35561e-23	1.49959	0.326	0.133	1.03311e-18				Arl6ip1	7.58853e-35	-1.02308	0.347	0.591	1.79992e-30	Blck6_TAL
Cttn	6.1241e-23	1.28592	0.422	0.233	1.45258e-18				Ybx2	9.23852e-35	-1.97267	0.053	0.201	2.19128e-30	Blck6_TAL
Tmem140	6.35094e-23	2.54423	0.213	0.049	1.50638e-18				Insig1	9.59691e-35	-2.45936	0.018	0.121	2.27629e-30	Blck6_TAL
Zfp697	6.5689e-23	1.66552	0.373	0.182	1.55808e-18				Cox5b	1.21868e-34	-1.1934	0.264	0.495	2.8906e-30	Blck6_TAL
9130230L23Rik	8.40456e-23	2.77574	0.197	0.038	1.99348e-18				Galm	1.23373e-34	-1.3169	0.144	0.352	2.92628e-30	Blck6_TAL
C230088H06Rik	1.01951e-22	2.12081	0.271	0.095	2.41818e-18				Slc7a8	1.3022e-34	-1.52578	0.152	0.358	3.08868e-30	Blck6_TAL
Trim30a	1.18153e-22	2.8504	0.194	0.037	2.80246e-18				Gm10635	1.44667e-34	-3.06466	0.015	0.113	3.43135e-30	Blck6_TAL
Tubb5	1.18797e-22	2.18028	0.239	0.069	2.81774e-18				Cntfr	5.19676e-34	-2.86462	0.018	0.118	1.23262e-29	Blck6_TAL
Cp	1.22314e-22	3.27686	0.222	0.058	2.90115e-18				Adam22	5.95883e-34	-1.27363	0.179	0.397	1.41337e-29	Blck6_TAL
Myo1b	1.67254e-22	2.55502	0.217	0.054	3.96711e-18				Aldh8a1	6.21799e-34	-2.22789	0.027	0.144	1.47485e-29	Blck6_TAL
Gm12860	1.76907e-22	3.48949	0.157	0.014	4.19607e-18				Gm13052	1.72762e-33	-1.7151	0.095	0.268	4.09774e-29	Blck6_TAL
Gpr39	1.7767e-22	1.26033	0.387	0.187	4.21416e-18				Filip1l	2.75467e-33	-1.2075	0.392	0.606	6.5338e-29	Blck6_TAL
Ndrg1	2.46358e-22	1.27639	0.507	0.342	5.84336e-18				Bcat2	2.7698e-33	-1.18354	0.224	0.446	6.56969e-29	Blck6_TAL
Acot9	3.26154e-22	1.41039	0.394	0.211	7.73604e-18				Bpnt1	5.30185e-33	-1.26343	0.2	0.418	1.25755e-28	Blck6_TAL
Isg15	3.88025e-22	2.97031	0.156	0.014	9.20357e-18				Ndufa5	1.42099e-32	-1.26859	0.205	0.42	3.37045e-28	Blck6_TAL
Capg	4.55851e-22	1.9506	0.243	0.072	1.08123e-17				Acot11	2.38267e-32	-1.54065	0.137	0.326	5.65146e-28	Blck6_TAL
Tlcd2	4.64537e-22	1.19898	0.476	0.3	1.10183e-17				Idh1	3.04533e-32	-1.20826	0.135	0.337	7.22323e-28	Blck6_TAL
Unc93b1	4.93866e-22	1.87416	0.265	0.089	1.1714e-17				4931406C07Rik	5.6238e-32	-1.30822	0.161	0.364	1.33391e-27	Blck6_TAL
Pde10a	6.69949e-22	2.75286	0.227	0.066	1.58905e-17				Srebf2	5.97404e-32	-1.12379	0.228	0.453	1.41698e-27	Blck6_TAL
Asic2	8.86825e-22	3.92793	0.152	0.014	2.10346e-17				Fmo2	8.64482e-32	-2.33088	0.024	0.132	2.05046e-27	Blck6_TAL
Npas2	1.41242e-21	3.71538	0.154	0.015	3.35011e-17				Vstm2a	8.84394e-32	-2.53582	0.027	0.136	2.09769e-27	Blck6_TAL
Hbegf	1.51821e-21	2.64024	0.229	0.069	3.60103e-17				Crocc	1.2956e-31	-1.6159	0.074	0.231	3.07304e-27	Blck6_TAL
H2-DMa	2.2365e-21	4.67007	0.139	0.008	5.30475e-17				Prps2	2.02133e-31	-1.16796	0.18	0.387	4.79439e-27	Blck6_TAL
Pmepa1	2.66229e-21	1.46068	0.456	0.296	6.31468e-17				Elfn1	2.29316e-31	-1.20707	0.18	0.391	5.43915e-27	Blck6_TAL
Ctsc	2.83688e-21	1.54377	0.468	0.299	6.72881e-17				Mettl24	5.04849e-31	-1.27603	0.192	0.397	1.19745e-26	Blck6_TAL
Birc3	3.35802e-21	1.5428	0.361	0.181	7.96488e-17				Myo3a	5.15506e-31	-1.78304	0.073	0.227	1.22273e-26	Blck6_TAL
Coro1a	4.8186e-21	4.91414	0.132	0.005	1.14292e-16				Phyhipl	8.57631e-31	-1.04697	0.323	0.559	2.03421e-26	Blck6_TAL
Ncam1	5.70229e-21	2.77401	0.189	0.04	1.35253e-16				Tns2	8.60264e-31	-1.33362	0.138	0.326	2.04046e-26	Blck6_TAL
Cebpb	5.76628e-21	3.03317	0.172	0.029	1.3677e-16				Pcx	9.12262e-31	-1.53317	0.103	0.274	2.1638e-26	Blck6_TAL
Srgap1	7.05935e-21	2.24853	0.186	0.037	1.67441e-16				Ptgds	1.13942e-30	-2.06232	0.036	0.156	2.7026e-26	Blck6_TAL
Tapbpl	8.07321e-21	3.43463	0.157	0.02	1.91488e-16				Msmo1	1.18998e-30	-1.85349	0.071	0.221	2.82252e-26	Blck6_TAL
Mpeg1	9.32622e-21	4.56945	0.135	0.008	2.21209e-16				Acadvl	1.60054e-30	-1.20394	0.171	0.372	3.79632e-26	Blck6_TAL
Pycard	1.30872e-20	1.62766	0.306	0.132	3.10416e-16				Lzts3	1.70493e-30	-1.07568	0.227	0.444	4.04393e-26	Blck6_TAL
Zc3hav1	1.72622e-20	1.88844	0.241	0.078	4.09441e-16				Snap91	1.8021e-30	-3.08778	0.015	0.103	4.27439e-26	Blck6_TAL
Dock5	1.96326e-20	1.15773	0.429	0.243	4.65665e-16				AI314278	3.07354e-30	-1.66545	0.058	0.199	7.29014e-26	Blck6_TAL
Junb	2.20324e-20	1.3756	0.338	0.159	5.22587e-16				Nr1d1	3.39958e-30	-1.73386	0.047	0.178	8.06347e-26	Blck6_TAL
Serinc2	2.87262e-20	1.62829	0.274	0.104	6.81357e-16				Jdp2	4.25287e-30	-1.28583	0.13	0.315	1.00874e-25	Blck6_TAL
Itgb8	3.39085e-20	1.0075	0.633	0.518	8.04276e-16				Mfap3l	6.49068e-30	-1.04741	0.245	0.469	1.53952e-25	Blck6_TAL
Lgals3bp	3.41461e-20	2.88547	0.173	0.032	8.09911e-16				Zfp385b	7.53962e-30	-1.38199	0.105	0.276	1.78832e-25	Blck6_TAL
Fcer1g	4.1985e-20	3.21155	0.162	0.026	9.95843e-16				D630024D03Rik	1.09525e-29	-1.75047	0.081	0.234	2.59782e-25	Blck6_TAL
Epsti1	5.229e-20	1.91313	0.258	0.095	1.24027e-15				Pygl	1.26261e-29	-1.14444	0.209	0.418	2.99478e-25	Blck6_TAL
Ifih1	5.30902e-20	2.15973	0.207	0.055	1.25925e-15				Tmem174	1.40764e-29	-1.39782	0.072	0.225	3.33878e-25	Blck6_TAL
Rps14	6.46904e-20	1.03634	0.539	0.387	1.53439e-15				Ndufv1	1.5656e-29	-1.14488	0.164	0.361	3.71345e-25	Blck6_TAL
Gm9844	7.17255e-20	3.92237	0.141	0.014	1.70126e-15				Lrrc31	1.94697e-29	-1.28701	0.418	0.58	4.61802e-25	Blck6_TAL
Ldlrad4	7.69797e-20	1.14454	0.599	0.458	1.82588e-15				Mapre2	4.02328e-29	-1.03629	0.251	0.47	9.54281e-25	Blck6_TAL
Rhob	8.95823e-20	3.65033	0.143	0.015	2.1248e-15				Slc5a12	5.02916e-29	-2.4902	0.024	0.124	1.19287e-24	Blck6_TAL
Plce1	1.11001e-19	2.02805	0.247	0.089	2.63283e-15				Narf	5.61089e-29	-1.0862	0.2	0.41	1.33085e-24	Blck6_TAL
Gdf15	1.35505e-19	4.27899	0.132	0.009	3.21404e-15				Bmp4	8.63497e-29	-1.99375	0.061	0.196	2.04813e-24	Blck6_TAL
Svil	1.447e-19	1.76257	0.253	0.092	3.43214e-15				Smpd1	1.00571e-28	-1.5038	0.091	0.25	2.38544e-24	Blck6_TAL
Arhgap28	2.04646e-19	2.56488	0.172	0.034	4.854e-15				Tarm1	1.47072e-28	-1.13616	0.166	0.361	3.4884e-24	Blck6_TAL
Litaf	2.16903e-19	1.06064	0.47	0.299	5.14472e-15				Ndufa12	1.67389e-28	-1.00219	0.295	0.513	3.97031e-24	Blck6_TAL
Rell1	2.67657e-19	1.53923	0.349	0.179	6.34855e-15				Cln3	1.82578e-28	-1.37271	0.135	0.314	4.33058e-24	Blck6_TAL
Sema3c	3.3499e-19	1.13636	0.564	0.426	7.94563e-15				Ndufa1	2.22182e-28	-1.22406	0.141	0.329	5.26993e-24	Blck6_TAL
Svopl	3.41404e-19	1.35577	0.389	0.228	8.09776e-15				Prmt3	8.17941e-28	-1.11493	0.182	0.377	1.94007e-23	Blck6_TAL
Fmnl3	3.61958e-19	1.82977	0.242	0.084	8.58529e-15				Ndufs8	1.50634e-27	-1.12409	0.15	0.337	3.57289e-23	Blck6_TAL
Aif1	3.81683e-19	4.82385	0.121	0.005	9.05314e-15				Glb1l2	3.14918e-27	-1.31763	0.123	0.294	7.46955e-23	Blck6_TAL
Parp3	3.89999e-19	1.64044	0.267	0.104	9.25039e-15				Rhobtb2	4.89654e-27	-1.26163	0.126	0.3	1.16141e-22	Blck6_TAL
Gm26624	4.01498e-19	1.37899	0.358	0.191	9.52313e-15				Cyp2j5	1.49308e-26	-1.38896	0.099	0.259	3.54144e-22	Blck6_TAL
Ddit4	4.3071e-19	2.17221	0.213	0.064	1.0216e-14				Glod5	1.83537e-26	-1.31627	0.099	0.256	4.35333e-22	Blck6_TAL
Apobec3	4.33606e-19	5.64492	0.117	0.003	1.02847e-14				Acy3	3.16116e-26	-1.01872	0.253	0.461	7.49794e-22	Blck6_TAL
Arhgef37	6.44534e-19	2.7168	0.171	0.035	1.52877e-14				Slc17a3	3.19625e-26	-2.131	0.029	0.129	7.58118e-22	Blck6_TAL
Ifi35	9.49886e-19	1.56819	0.261	0.101	2.25304e-14				Prox1os	4.53534e-26	-1.97676	0.035	0.142	1.07574e-21	Blck6_TAL
Sorbs2os	1.38712e-18	1.91367	0.262	0.107	3.29012e-14				Slc22a2	1.52065e-25	-2.16133	0.021	0.11	3.60682e-21	Blck6_TAL
Flvcr1	2.77246e-18	1.25219	0.492	0.357	6.576e-14				Xylt1	1.68463e-25	-1.16879	0.057	0.182	3.99576e-21	Blck6_TAL
Ifi27l2a	3.01065e-18	4.55432	0.126	0.011	7.14096e-14				Sardh	1.87367e-25	-1.53255	0.07	0.205	4.44417e-21	Blck6_TAL
Fxyd5	3.09009e-18	4.07517	0.124	0.009	7.32939e-14				Kcnj10	3.2907e-25	-1.37099	0.158	0.328	7.8052e-21	Blck6_TAL
Isg20	3.14468e-18	6.0985	0.109	0.002	7.45887e-14				Hsd17b14	6.0566e-25	-2.03243	0.033	0.135	1.43656e-20	Blck6_TAL
Nub1	3.21539e-18	1.08059	0.422	0.25	7.62659e-14				Slc16a5	7.44135e-25	-1.14308	0.162	0.342	1.76501e-20	Blck6_TAL
C4b	4.41985e-18	5.11289	0.114	0.005	1.04835e-13				Idh3g	8.36641e-25	-1.1784	0.147	0.317	1.98443e-20	Blck6_TAL
Flna	5.47208e-18	2.70042	0.162	0.034	1.29792e-13				Ephx2	9.86514e-25	-1.39308	0.053	0.176	2.33991e-20	Blck6_TAL
Runx1	7.46439e-18	3.91282	0.121	0.009	1.77048e-13				Scara5	1.41419e-24	-1.5639	0.071	0.202	3.35431e-20	Blck6_TAL
Serpina3g	7.83842e-18	7.43997	0.104	0	1.8592e-13				Atp6v1b1	1.89652e-24	-1.44998	0.095	0.24	4.49835e-20	Blck6_TAL
Sipa1l1	9.92124e-18	1.04923	0.437	0.279	2.35322e-13				Depdc1b	1.96399e-24	-1.31896	0.1	0.25	4.65838e-20	Blck6_TAL
Ciita	1.00946e-17	3.52151	0.129	0.014	2.39433e-13				Ehhadh	2.91013e-24	-1.39037	0.092	0.236	6.90253e-20	Blck6_TAL
Rasd1	1.18395e-17	5.51471	0.109	0.003	2.80821e-13				Bdh1	5.29665e-24	-1.07255	0.13	0.296	1.25631e-19	Blck6_TAL
Tnfrsf21	1.87744e-17	1.11929	0.502	0.372	4.4531e-13				Gnaz	6.06863e-24	-1.44782	0.073	0.205	1.43942e-19	Blck6_TAL
Ly75	2.63542e-17	3.70528	0.126	0.014	6.25095e-13				Mgll	8.0233e-24	-1.18106	0.133	0.299	1.90305e-19	Blck6_TAL
Grn	3.00343e-17	1.44633	0.306	0.15	7.12383e-13				Akr1c19	8.25615e-24	-1.04038	0.116	0.277	1.95828e-19	Blck6_TAL
Rps11	3.40064e-17	1.07183	0.48	0.34	8.06598e-13				Bahcc1	8.98675e-24	-1.32307	0.098	0.243	2.13157e-19	Blck6_TAL
4930599N23Rik	3.45433e-17	1.15856	0.379	0.222	8.19334e-13				Esam	9.82794e-24	-1.31388	0.072	0.205	2.33109e-19	Blck6_TAL
Sh3d19	3.51045e-17	1.04638	0.435	0.274	8.32643e-13				Tmem38a	2.5113e-23	-1.15116	0.124	0.282	5.95654e-19	Blck6_TAL
Notch1	3.69987e-17	2.54689	0.164	0.038	8.77572e-13				Rgcc	3.35295e-23	-2.06099	0.035	0.133	7.95286e-19	Blck6_TAL
Gm6034	3.81861e-17	3.38419	0.121	0.011	9.05736e-13				Ror2	3.75933e-23	-1.33767	0.099	0.242	8.91675e-19	Blck6_TAL
Ddx60	4.42461e-17	2.77804	0.128	0.015	1.04947e-12				Gm33023	3.91472e-23	-1.70628	0.032	0.129	9.28532e-19	Blck6_TAL
Gm1604a	4.99479e-17	1.67189	0.236	0.09	1.18471e-12				AA986860	4.01208e-23	-1.00962	0.18	0.358	9.51626e-19	Blck6_TAL
Gm10260	5.46368e-17	4.93611	0.108	0.005	1.29593e-12				Kcnn1	4.71095e-23	-1.72712	0.04	0.144	1.11739e-18	Blck6_TAL
Trim34a	5.53796e-17	1.76058	0.21	0.069	1.31355e-12				Cela1	5.60182e-23	-1.96742	0.031	0.124	1.32869e-18	Blck6_TAL
AU020206	7.43689e-17	4.32625	0.113	0.008	1.76396e-12				2610035D17Rik	5.89256e-23	-1.07125	0.227	0.406	1.39766e-18	Blck6_TAL
Mgp	7.86003e-17	2.53255	0.181	0.054	1.86432e-12				Slc16a9	1.05397e-22	-1.77726	0.021	0.103	2.49991e-18	Blck6_TAL
Laptm5	8.40369e-17	5.0324	0.107	0.005	1.99327e-12				2410015M20Rik	1.08099e-22	-1.0222	0.209	0.394	2.56399e-18	Blck6_TAL
Sp140	1.09051e-16	3.1737	0.135	0.021	2.58657e-12				Slc26a10	1.35626e-22	-1.95805	0.033	0.127	3.2169e-18	Blck6_TAL
Klf7	1.30642e-16	1.29069	0.366	0.211	3.0987e-12				Cntd1	1.8718e-22	-1.34087	0.086	0.222	4.43971e-18	Blck6_TAL
AC133498.1	1.51336e-16	3.71087	0.114	0.009	3.58954e-12				Per2	2.02106e-22	-1.01805	0.162	0.331	4.79375e-18	Blck6_TAL
Hap1	1.83033e-16	3.05585	0.13	0.018	4.34135e-12				Dclk3	2.25825e-22	-1.37876	0.102	0.243	5.35635e-18	Blck6_TAL
Tagln2	2.67479e-16	1.81506	0.209	0.074	6.34434e-12				G6pc	2.27803e-22	-2.14406	0.027	0.115	5.40325e-18	Blck6_TAL
Sp100	2.71289e-16	4.15677	0.105	0.005	6.43471e-12				Aass	5.19602e-22	-1.56997	0.05	0.159	1.23244e-17	Blck6_TAL
Lst1	2.81338e-16	5.57802	0.101	0.003	6.67306e-12				Coq8a	7.65681e-22	-1.57977	0.054	0.165	1.81612e-17	Blck6_TAL
C1qc	3.02321e-16	5.08039	0.103	0.005	7.17075e-12				Tmem61	1.03e-21	-2.11886	0.029	0.116	2.44305e-17	Blck6_TAL
Nxpe3	3.23763e-16	1.82398	0.22	0.081	7.67933e-12				Lrpap1	1.24952e-21	-1.0329	0.151	0.314	2.96374e-17	Blck6_TAL
Tnfrsf12a	3.9851e-16	2.69859	0.151	0.034	9.45225e-12				Abat	1.57436e-21	-1.17265	0.168	0.329	3.73423e-17	Blck6_TAL
Mcc	4.66487e-16	1.75304	0.214	0.077	1.10646e-11				Slco1a6	1.87083e-21	-2.03302	0.032	0.123	4.43743e-17	Blck6_TAL
Trpm3	4.99741e-16	1.2153	0.318	0.162	1.18534e-11				Aqp1	1.90001e-21	-1.02588	0.084	0.219	4.50664e-17	Blck6_TAL
Clcf1	5.20357e-16	3.10457	0.129	0.02	1.23424e-11				Crat	5.30961e-21	-1.1408	0.135	0.286	1.25939e-16	Blck6_TAL
Rnf217	5.37492e-16	1.11437	0.369	0.208	1.27488e-11				Slc47a1	6.85803e-21	-1.40642	0.071	0.193	1.62666e-16	Blck6_TAL
Hspb1	6.27993e-16	3.25989	0.126	0.018	1.48954e-11				Rdm1	8.95329e-21	-1.384	0.067	0.184	2.12363e-16	Blck6_TAL
Irf9	6.69772e-16	1.78797	0.201	0.069	1.58863e-11				Klf15	9.64186e-21	-1.2852	0.081	0.207	2.28695e-16	Blck6_TAL
Serpinb9	7.3899e-16	2.76855	0.141	0.028	1.75281e-11				Spa17	1.01016e-20	-1.59164	0.061	0.173	2.396e-16	Blck6_TAL
Pdlim7	7.43055e-16	2.04566	0.186	0.058	1.76245e-11				Dhcr24	1.3998e-20	-1.24598	0.068	0.188	3.32019e-16	Blck6_TAL
Cxcl16	7.67536e-16	1.93979	0.211	0.078	1.82052e-11				Tmem53	1.9525e-20	-1.04917	0.124	0.273	4.63113e-16	Blck6_TAL
Pomp	9.70144e-16	1.26409	0.324	0.172	2.30108e-11				Gm42889	1.96537e-20	-1.75745	0.028	0.112	4.66165e-16	Blck6_TAL
Trim5	1.0769e-15	3.17387	0.127	0.02	2.55429e-11				Cry2	2.50439e-20	-1.14158	0.12	0.262	5.94016e-16	Blck6_TAL
Slc39a14	1.13335e-15	1.14161	0.394	0.245	2.68819e-11				Ndufs7	2.99571e-20	-1.01586	0.192	0.358	7.10552e-16	Blck6_TAL
Dapp1	1.37241e-15	2.14037	0.155	0.037	3.25522e-11				Cadm4	4.20582e-20	-1.13004	0.107	0.245	9.97579e-16	Blck6_TAL
Wars	1.37716e-15	1.83859	0.226	0.092	3.26648e-11				Fam189a2	4.20864e-20	-1.32548	0.086	0.213	9.98248e-16	Blck6_TAL
Rapgef4	1.59977e-15	4.24226	0.11	0.011	3.7945e-11				Fam228b	4.36093e-20	-1.19195	0.109	0.247	1.03437e-15	Blck6_TAL
Cdk6	1.8535e-15	1.30353	0.297	0.147	4.39633e-11				Gnpda1	4.49568e-20	-1.08869	0.094	0.227	1.06633e-15	Blck6_TAL
Abcg1	1.91939e-15	3.40909	0.111	0.011	4.5526e-11				Slc25a35	4.49888e-20	-1.33793	0.085	0.208	1.06709e-15	Blck6_TAL
Itpr3	2.20231e-15	2.60157	0.136	0.026	5.22366e-11				Gpc5	5.25456e-20	-1.69587	0.317	0.455	1.24633e-15	Blck6_TAL
Birc2	2.66299e-15	1.04432	0.467	0.328	6.31636e-11				Ak1	6.83432e-20	-1.31431	0.072	0.188	1.62103e-15	Blck6_TAL
Baz1a	2.67158e-15	1.37556	0.252	0.11	6.33672e-11				Aldh2	8.48942e-20	-1.00619	0.18	0.345	2.0136e-15	Blck6_TAL
Ppl	4.81369e-15	2.21602	0.159	0.043	1.14176e-10				Slc5a8	9.9764e-20	-1.89734	0.024	0.103	2.3663e-15	Blck6_TAL
Arhgdib	5.52491e-15	3.15968	0.125	0.021	1.31045e-10				Idi1	1.08237e-19	-1.76664	0.031	0.116	2.56728e-15	Blck6_TAL
Pros1	6.40195e-15	2.40426	0.129	0.023	1.51848e-10				Akr7a5	1.16824e-19	-1.06046	0.094	0.225	2.77094e-15	Blck6_TAL
Arhgap42	7.52629e-15	1.85235	0.192	0.067	1.78516e-10				Oprm1	1.1755e-19	-1.19139	0.068	0.184	2.78816e-15	Blck6_TAL
A230050P20Rik	8.5472e-15	2.03046	0.165	0.047	2.02731e-10				Stard4	1.32835e-19	-1.64754	0.038	0.129	3.15071e-15	Blck6_TAL
Ifit2	1.12842e-14	1.6786	0.232	0.101	2.6765e-10				Flvcr2	1.69553e-19	-1.03117	0.158	0.312	4.02164e-15	Blck6_TAL
Tubb2b	1.24046e-14	1.97852	0.158	0.043	2.94226e-10				Cd36	1.80196e-19	-1.63785	0.048	0.147	4.27407e-15	Blck6_TAL
Cdc42se2	1.24244e-14	1.01843	0.368	0.216	2.94695e-10				Thnsl2	1.94903e-19	-1.46763	0.042	0.138	4.62291e-15	Blck6_TAL
Mov10	1.29715e-14	1.59123	0.202	0.074	3.07672e-10				Gm17029	2.48692e-19	-1.15343	0.089	0.216	5.89872e-15	Blck6_TAL
Mvp	1.5961e-14	1.84158	0.201	0.077	3.78579e-10				Gm26782	2.84764e-19	-1.03268	0.156	0.306	6.75432e-15	Blck6_TAL
Pappa	1.84065e-14	1.15248	0.378	0.225	4.36583e-10				Pbld1	2.91989e-19	-1.87475	0.039	0.129	6.9257e-15	Blck6_TAL
Rsad2	3.13127e-14	2.44684	0.109	0.014	7.42705e-10				Lipa	3.33883e-19	-1.03667	0.092	0.222	7.91937e-15	Blck6_TAL
Usp18	3.45567e-14	2.33633	0.107	0.012	8.1965e-10				Alpl	3.87355e-19	-1.57711	0.028	0.109	9.18767e-15	Blck6_TAL
Tbrg1	3.64849e-14	1.50711	0.235	0.104	8.65386e-10				Slc22a1	4.30372e-19	-1.75212	0.03	0.112	1.0208e-14	Blck6_TAL
Akr1b8	3.7558e-14	3.40683	0.108	0.014	8.90837e-10				Stpg2	5.41778e-19	-1.22299	0.126	0.263	1.28504e-14	Blck6_TAL
Gm10076	4.96401e-14	1.58054	0.223	0.096	1.17741e-09				Pink1	5.45502e-19	-1.18253	0.119	0.254	1.29388e-14	Blck6_TAL
Tubb2a	5.96903e-14	1.52107	0.234	0.106	1.41579e-09				Isoc2a	5.72589e-19	-1.07395	0.175	0.323	1.35812e-14	Blck6_TAL
Il13ra1	6.94372e-14	1.10576	0.38	0.247	1.64698e-09				Gcdh	8.20958e-19	-1.16867	0.089	0.213	1.94723e-14	Blck6_TAL
Ucp2	6.95704e-14	1.80169	0.186	0.067	1.65014e-09				Hmgcr	8.22446e-19	-1.0688	0.115	0.251	1.95076e-14	Blck6_TAL
Ifit1	7.29253e-14	2.52856	0.131	0.029	1.72972e-09				Isoc2b	8.50241e-19	-1.54978	0.046	0.141	2.01669e-14	Blck6_TAL
Ier3	7.73605e-14	1.12538	0.36	0.217	1.83491e-09				4930480K23Rik	1.18082e-18	-1.23046	0.073	0.187	2.80079e-14	Blck6_TAL
Gnai2	8.00996e-14	1.32626	0.296	0.164	1.89988e-09				Gm45846	1.22542e-18	-1.82102	0.025	0.101	2.90657e-14	Blck6_TAL
Arrdc4	9.39068e-14	1.77228	0.176	0.06	2.22738e-09				Syngr1	1.6192e-18	-1.05758	0.097	0.224	3.84059e-14	Blck6_TAL
Krt18	9.54512e-14	2.74264	0.123	0.025	2.26401e-09				Fbxl7	1.88356e-18	-1.06621	0.383	0.544	4.46763e-14	Blck6_TAL
Lrrk1	9.64858e-14	1.17902	0.317	0.178	2.28855e-09				Rragd	2.11939e-18	-1.21606	0.119	0.251	5.02699e-14	Blck6_TAL
Eda	1.88794e-13	1.35026	0.23	0.101	4.47801e-09				Gm47438	2.17206e-18	-1.57748	0.056	0.156	5.15192e-14	Blck6_TAL
Cbs	2.91407e-13	2.07015	0.153	0.046	6.91188e-09				Calml4	3.69105e-18	-1.22095	0.071	0.184	8.7548e-14	Blck6_TAL
Angptl4	3.19524e-13	3.32725	0.107	0.017	7.57879e-09				Shd	5.53789e-18	-1.10284	0.098	0.222	1.31353e-13	Blck6_TAL
Tgfbr2	3.35597e-13	1.33223	0.266	0.136	7.96002e-09				Serpina1f	8.46329e-18	-1.38968	0.048	0.142	2.00741e-13	Blck6_TAL
Csrp1	3.44857e-13	1.93076	0.155	0.047	8.17967e-09				Epb41l3	9.27135e-18	-1.65075	0.053	0.149	2.19907e-13	Blck6_TAL
Btg1	3.49774e-13	1.09958	0.334	0.198	8.2963e-09				Prickle1	9.3051e-18	-1.01723	0.196	0.346	2.20708e-13	Blck6_TAL
Tec	3.97957e-13	1.54547	0.2	0.081	9.43914e-09				Syne3	1.11003e-17	-1.0188	0.134	0.273	2.63289e-13	Blck6_TAL
Cd9	4.23267e-13	1.07575	0.391	0.259	1.00395e-08				Atp4a	1.59076e-17	-1.55231	0.05	0.144	3.77312e-13	Blck6_TAL
Sparc	5.14966e-13	3.47132	0.103	0.015	1.22145e-08				Gcnt1	2.23651e-17	-1.11504	0.094	0.216	5.30478e-13	Blck6_TAL
Trpm6	5.21331e-13	1.56456	0.15	0.044	1.23655e-08				Aldh9a1	2.30064e-17	-1.04642	0.123	0.256	5.45689e-13	Blck6_TAL
Steap1	6.73625e-13	3.10811	0.105	0.017	1.59777e-08				Cux2	2.70442e-17	-1.04442	0.174	0.319	6.4146e-13	Blck6_TAL
Map4k4	7.62086e-13	1.06665	0.317	0.182	1.80759e-08				Tmem229a	3.15119e-17	-1.57757	0.036	0.118	7.4743e-13	Blck6_TAL
Cdh3	1.01085e-12	1.10689	0.333	0.198	2.39763e-08				Glycam1	3.75679e-17	-1.78188	0.028	0.103	8.91074e-13	Blck6_TAL
Shisa4	1.10081e-12	2.2801	0.131	0.034	2.61101e-08				Gm14532	4.53281e-17	-1.66272	0.056	0.152	1.07514e-12	Blck6_TAL
Plscr1	1.17514e-12	1.21426	0.327	0.198	2.7873e-08				Sgcd	4.89117e-17	-1.41034	0.067	0.168	1.16014e-12	Blck6_TAL
Fgd3	1.3701e-12	1.84611	0.214	0.1	3.24973e-08				Aspa	6.15571e-17	-1.7387	0.027	0.101	1.46007e-12	Blck6_TAL
1700109K24Rik	1.38691e-12	3.09827	0.106	0.018	3.28962e-08				A330032B11Rik	1.61758e-16	-1.04344	0.117	0.242	3.83673e-12	Blck6_TAL
Jazf1	1.58475e-12	2.03336	0.144	0.043	3.75888e-08				Cnnm3	2.0788e-16	-1.06937	0.104	0.222	4.93071e-12	Blck6_TAL
Etl4	1.60214e-12	1.21014	0.591	0.51	3.80012e-08				Prom2	2.48566e-16	-1.05516	0.116	0.24	5.89574e-12	Blck6_TAL
Ptprc	1.73885e-12	3.11919	0.102	0.017	4.12439e-08				Cryzl2	3.26583e-16	-1.48008	0.042	0.126	7.74622e-12	Blck6_TAL
Slc41a2	1.90696e-12	3.29081	0.102	0.017	4.52313e-08				Anapc13	3.35094e-16	-1.07276	0.129	0.257	7.94808e-12	Blck6_TAL
Ctgf	2.03565e-12	3.4859	0.102	0.017	4.82836e-08				Pde6a	5.08042e-16	-1.42691	0.029	0.101	1.20502e-11	Blck6_TAL
Anxa2	2.07784e-12	1.08128	0.356	0.234	4.92843e-08				Hnf4a	5.33474e-16	-1.23961	0.058	0.153	1.26535e-11	Blck6_TAL
Pitpnm2	2.30405e-12	1.36077	0.212	0.093	5.46499e-08				Rps6ka5	6.8124e-16	-1.22481	0.121	0.242	1.61583e-11	Blck6_TAL
Aoc1	2.3745e-12	1.3402	0.236	0.116	5.63209e-08				Hnmt	1.65452e-15	-1.28021	0.077	0.179	3.92436e-11	Blck6_TAL
Tceal9	2.47074e-12	1.22272	0.294	0.17	5.86034e-08				Bmp5	1.70271e-15	-1.78179	0.05	0.136	4.03867e-11	Blck6_TAL
Uap1	2.73757e-12	1.05996	0.353	0.221	6.49325e-08				Slc23a1	1.94887e-15	-1.48471	0.042	0.124	4.62252e-11	Blck6_TAL
Trim47	2.76373e-12	1.42913	0.217	0.1	6.55528e-08				Tmem52b	2.02302e-15	-1.68828	0.114	0.225	4.7984e-11	Blck6_TAL
Arhgap8	3.01495e-12	1.2451	0.217	0.096	7.15116e-08				Itpr2	3.0746e-15	-1.28164	0.3	0.427	7.29265e-11	Blck6_TAL
Nras	3.1386e-12	1.17942	0.268	0.141	7.44444e-08				Sema3b	3.49663e-15	-1.21676	0.068	0.165	8.29367e-11	Blck6_TAL
Mboat1	4.31288e-12	1.29417	0.278	0.153	1.02297e-07				Gpam	4.00063e-15	-1.18053	0.093	0.201	9.48911e-11	Blck6_TAL
Jpt1	4.63458e-12	1.91485	0.149	0.049	1.09927e-07				Xylb	5.16282e-15	-1.61771	0.039	0.116	1.22457e-10	Blck6_TAL
Gm26542	4.82625e-12	1.03295	0.352	0.222	1.14474e-07				Igfbp5	5.28021e-15	-1.16006	0.058	0.15	1.25241e-10	Blck6_TAL
Btg3	4.87537e-12	1.44098	0.214	0.098	1.15639e-07				Sfxn4	6.84318e-15	-1.10065	0.091	0.199	1.62313e-10	Blck6_TAL
Csf1	4.94181e-12	2.48744	0.113	0.025	1.17215e-07				Slc17a1	6.856e-15	-1.1251	0.065	0.161	1.62618e-10	Blck6_TAL
Tgif1	5.80771e-12	1.52094	0.168	0.061	1.37753e-07				Ccdc107	7.42484e-15	-1.01936	0.127	0.25	1.7611e-10	Blck6_TAL
Spats2l	6.20527e-12	1.94988	0.148	0.049	1.47183e-07				B230369F24Rik	7.91924e-15	-1.44949	0.048	0.132	1.87837e-10	Blck6_TAL
Zwint	6.52878e-12	1.00891	0.335	0.208	1.54856e-07				Dnajc6	1.69621e-14	-1.67694	0.032	0.103	4.02323e-10	Blck6_TAL
Slc34a2	8.32639e-12	2.05748	0.156	0.057	1.97494e-07				Ccdc189	1.95397e-14	-1.45779	0.034	0.106	4.63462e-10	Blck6_TAL
Msrb1	8.6317e-12	1.22811	0.245	0.126	2.04735e-07				Dhtkd1	2.54332e-14	-1.36538	0.053	0.138	6.0325e-10	Blck6_TAL
Aen	8.78421e-12	2.18867	0.119	0.029	2.08353e-07				Abcg2	2.6099e-14	-1.18384	0.064	0.156	6.19042e-10	Blck6_TAL
Ptk7	9.56832e-12	1.13085	0.23	0.109	2.26951e-07				Sfrp1	2.96334e-14	-1.9595	0.136	0.247	7.02875e-10	Blck6_TAL
B4galt1	1.02399e-11	1.00982	0.323	0.196	2.42881e-07				Itgae	3.12607e-14	-1.36571	0.052	0.136	7.41473e-10	Blck6_TAL
Gm26669	1.30032e-11	1.72175	0.187	0.081	3.08422e-07				Fads1	3.36373e-14	-1.32472	0.039	0.115	7.97842e-10	Blck6_TAL
Bcl3	1.85046e-11	1.75764	0.15	0.052	4.3891e-07				5430402O13Rik	4.55998e-14	-1.04521	0.106	0.216	1.08158e-09	Blck6_TAL
Eif1a	1.93522e-11	1.17857	0.255	0.135	4.59015e-07				Cadm2	5.48803e-14	-1.21461	0.119	0.227	1.30171e-09	Blck6_TAL
Rnf145	2.02284e-11	1.24326	0.255	0.138	4.79796e-07				Ush1c	1.07636e-13	-1.15561	0.115	0.224	2.55303e-09	Blck6_TAL
Rhoc	2.33422e-11	1.90097	0.13	0.038	5.53654e-07				Zfp711	1.09046e-13	-1.01381	0.084	0.184	2.58646e-09	Blck6_TAL
Cadps2	2.37384e-11	1.02555	0.436	0.314	5.63051e-07				Fdft1	1.2306e-13	-1.06434	0.12	0.23	2.91887e-09	Blck6_TAL
Arpc5	3.09681e-11	1.03079	0.318	0.196	7.34531e-07				Ccdc68	1.39617e-13	-1.73183	0.034	0.103	3.31157e-09	Blck6_TAL
Tpm4	3.36493e-11	1.37659	0.213	0.104	7.98127e-07				Tmem8	1.47605e-13	-1.17524	0.066	0.156	3.50104e-09	Blck6_TAL
Uchl3	4.37447e-11	1.02381	0.311	0.19	1.03758e-06				Fstl3	2.36895e-13	-1.41429	0.046	0.123	5.6189e-09	Blck6_TAL
Ywhah	4.55834e-11	1.38341	0.229	0.119	1.08119e-06				Dcxr	3.10967e-13	-1.30285	0.04	0.113	7.37584e-09	Blck6_TAL
Desi1	4.89264e-11	1.25035	0.232	0.119	1.16049e-06				Asb9	3.46978e-13	-1.56951	0.046	0.121	8.22998e-09	Blck6_TAL
Itga3	5.76581e-11	1.25585	0.239	0.127	1.36759e-06				Gm27201	5.47957e-13	-1.49151	0.038	0.107	1.2997e-08	Blck6_TAL
Galnt3	6.44094e-11	2.04602	0.124	0.037	1.52773e-06				Gm4221	9.04415e-13	-1.48941	0.042	0.115	2.14518e-08	Blck6_TAL
Ftl1-ps1	6.84547e-11	1.53405	0.225	0.121	1.62368e-06				Msrb2	9.95055e-13	-1.09854	0.081	0.173	2.36017e-08	Blck6_TAL
Gm26632	7.03484e-11	1.07456	0.367	0.254	1.66859e-06				Id4	1.38384e-12	-1.07972	0.07	0.158	3.28232e-08	Blck6_TAL
Mitd1	7.27975e-11	1.09707	0.243	0.127	1.72668e-06				Lyrm7	1.54279e-12	-1.1006	0.053	0.132	3.65935e-08	Blck6_TAL
Jpt2	7.77427e-11	1.32955	0.217	0.109	1.84398e-06				Lama1	1.58596e-12	-1.42497	0.116	0.219	3.76174e-08	Blck6_TAL
Rbl1	1.12405e-10	1.36593	0.177	0.075	2.66614e-06				Dhrs11	1.59668e-12	-1.00759	0.107	0.208	3.78716e-08	Blck6_TAL
Eif6	1.25844e-10	1.70244	0.163	0.067	2.9849e-06				Dclk2	1.90327e-12	-1.04162	0.082	0.175	4.51436e-08	Blck6_TAL
Camkk2	1.59279e-10	1.54938	0.172	0.074	3.77793e-06				Gm26606	2.13444e-12	-1.06844	0.085	0.179	5.06268e-08	Blck6_TAL
Actn1	1.62507e-10	1.31357	0.222	0.115	3.85451e-06				Pfkm	2.37098e-12	-1.10659	0.083	0.175	5.62372e-08	Blck6_TAL
Itgav	1.70264e-10	1.03664	0.695	0.655	4.0385e-06				Cideb	2.54987e-12	-1.32841	0.037	0.104	6.04804e-08	Blck6_TAL
Sult1d1	1.73903e-10	1.01574	0.451	0.371	4.12481e-06				Slc1a1	4.80308e-12	-1.07786	0.113	0.214	1.13924e-07	Blck6_TAL
Psma5	1.81894e-10	1.2785	0.232	0.124	4.31435e-06				Irs2	5.52352e-12	-1.05044	0.086	0.176	1.31012e-07	Blck6_TAL
Kbtbd11	2.13655e-10	1.63411	0.14	0.049	5.06768e-06				Arrb1	6.79927e-12	-1.06693	0.09	0.184	1.61272e-07	Blck6_TAL
Chrnb1	2.50433e-10	1.57809	0.143	0.052	5.94001e-06				Asl	7.09005e-12	-1.02124	0.081	0.172	1.68169e-07	Blck6_TAL
Npc2	2.87561e-10	1.09072	0.296	0.188	6.82067e-06				Abhd3	8.43769e-12	-1.30575	0.059	0.136	2.00134e-07	Blck6_TAL
Lrrc4	4.21647e-10	1.00523	0.369	0.262	1.0001e-05				Gm46102	1.10431e-11	-1.31279	0.058	0.135	2.61932e-07	Blck6_TAL
Efhd2	4.36182e-10	1.66796	0.148	0.058	1.03458e-05				Ifit1bl2	1.16483e-11	-1.32827	0.045	0.115	2.76287e-07	Blck6_TAL
Lgals8	4.69792e-10	1.05317	0.282	0.173	1.1143e-05				Upb1	1.28699e-11	-1.26047	0.042	0.11	3.0526e-07	Blck6_TAL
Plekha2	5.48025e-10	1.42252	0.185	0.087	1.29986e-05				Fam228a	2.72989e-11	-1.28552	0.048	0.118	6.47503e-07	Blck6_TAL
Egr1	5.64146e-10	2.23079	0.128	0.044	1.3381e-05				Aldoc	4.34058e-11	-1.37156	0.039	0.103	1.02954e-06	Blck6_TAL
Gm11099	6.99064e-10	1.43769	0.223	0.121	1.65811e-05				Hs3st3b1	5.82212e-11	-1.14761	0.054	0.126	1.38095e-06	Blck6_TAL
Parp11	7.99654e-10	1.3328	0.179	0.081	1.8967e-05				Pxmp2	6.08582e-11	-1.08726	0.054	0.127	1.4435e-06	Blck6_TAL
D430041D05Rik	8.16213e-10	2.49129	0.105	0.029	1.93598e-05				Bdh2	7.0614e-11	-1.2046	0.041	0.106	1.67489e-06	Blck6_TAL
Hprt	9.40702e-10	1.03639	0.277	0.168	2.23125e-05				Gm6999	7.79502e-11	-1.32482	0.052	0.123	1.8489e-06	Blck6_TAL
Hnf4g	1.03024e-09	1.96904	0.123	0.041	2.44363e-05				Lonrf1	1.02032e-10	-1.07732	0.054	0.126	2.42011e-06	Blck6_TAL
H2afz	1.09669e-09	1.12452	0.279	0.176	2.60125e-05				Gm31793	1.08911e-10	-1.29154	0.05	0.118	2.58325e-06	Blck6_TAL
Prune2	1.32088e-09	1.7925	0.114	0.035	3.13299e-05				Slc35f2	1.12074e-10	-1.1556	0.058	0.13	2.65828e-06	Blck6_TAL
Bmyc	1.47715e-09	2.11249	0.109	0.032	3.50364e-05				Rsad1	1.92924e-10	-1.03309	0.07	0.147	4.57597e-06	Blck6_TAL
Far1os	1.8211e-09	1.36179	0.189	0.093	4.31946e-05				Tkfc	1.95321e-10	-1.10584	0.052	0.121	4.63283e-06	Blck6_TAL
Crybg1	2.75475e-09	1.45581	0.158	0.069	6.53398e-05				Zfp808	2.70123e-10	-1.02848	0.092	0.178	6.40705e-06	Blck6_TAL
Mtss1l	2.95331e-09	2.00744	0.119	0.041	7.00497e-05				Pld1	3.5043e-10	-1.07916	0.072	0.149	8.31186e-06	Blck6_TAL
Sfn	3.12478e-09	1.72384	0.114	0.037	7.41166e-05				Ids	4.47627e-10	-1.02816	0.062	0.135	1.06173e-05	Blck6_TAL
Arhgef5	3.17256e-09	1.02172	0.255	0.15	7.525e-05				Rufy4	5.1377e-10	-1.27943	0.054	0.121	1.21861e-05	Blck6_TAL
Ppa1	4.04446e-09	1.37668	0.172	0.081	9.59304e-05				Ctsf	7.94282e-10	-1.11876	0.055	0.123	1.88396e-05	Blck6_TAL
Vasp	4.12296e-09	1.25622	0.197	0.103	9.77925e-05				Kirrel3	9.43776e-10	-1.57586	0.062	0.13	2.23854e-05	Blck6_TAL
Gm40271	4.6988e-09	1.3075	0.223	0.127	0.000111451				Scg5	1.48673e-09	-1.05556	0.069	0.142	3.52637e-05	Blck6_TAL
Tubb4b	4.7754e-09	1.04403	0.229	0.129	0.000113268				Fn3k	1.61076e-09	-1.12779	0.042	0.103	3.82056e-05	Blck6_TAL
E2f3	5.08907e-09	1.07036	0.243	0.142	0.000120708				4732491K20Rik	1.81333e-09	-1.14969	0.048	0.11	4.30104e-05	Blck6_TAL
Bak1	5.52731e-09	1.61243	0.146	0.063	0.000131102				Oxsm	2.38962e-09	-1.3056	0.049	0.11	5.66794e-05	Blck6_TAL
Ptger4	6.14231e-09	1.7757	0.133	0.054	0.000145689				Atp10b	2.57869e-09	-1.06846	0.044	0.104	6.1164e-05	Blck6_TAL
Zyx	6.71576e-09	1.98134	0.112	0.038	0.000159291				Tmie	2.58465e-09	-1.0261	0.072	0.145	6.13053e-05	Blck6_TAL
Prdx4	7.82335e-09	1.59028	0.136	0.055	0.000185562				Thsd4	2.76749e-09	-1.33004	0.24	0.329	6.56421e-05	Blck6_TAL
Ankrd46	8.10918e-09	1.21467	0.17	0.08	0.000192342				Srl	5.34823e-09	-1.0997	0.069	0.139	0.000126855	Blck6_TAL
Ctnnd2	1.0124e-08	2.3833	0.129	0.052	0.000240132				Gm13844	6.59358e-09	-1.09683	0.062	0.129	0.000156393	Blck6_TAL
Ppp4r4	1.23972e-08	1.05311	0.183	0.09	0.000294049				Fgfr4	1.59753e-08	-1.09855	0.054	0.115	0.000378918	Blck6_TAL
Dgkh	1.29464e-08	1.73381	0.122	0.046	0.000307075				Fam71e1	1.61034e-08	-1.01673	0.05	0.11	0.000381956	Blck6_TAL
Gm15860	1.31822e-08	1.48472	0.268	0.178	0.000312668				Cyp4a31	4.39077e-08	-1.17497	0.047	0.103	0.00104145	Blck6_TAL
Rhobtb3	1.37563e-08	1.75487	0.113	0.04	0.000326287				Trmt10a	1.11687e-07	-1.02433	0.079	0.145	0.00264911	Blck6_TAL
Mapk13	1.56811e-08	1.43675	0.129	0.051	0.00037194				Kcnc3	2.28746e-07	-1.09929	0.055	0.11	0.00542562	Blck6_TAL
Tes	1.65257e-08	1.42756	0.154	0.07	0.000391973				Map3k15	5.55023e-07	-1.08809	0.05	0.101	0.0131646	Blck6_TAL
Nek11	1.68424e-08	1.32311	0.136	0.055	0.000399485				Zfp972	8.72617e-07	-1.04018	0.056	0.109	0.0206976	Blck6_TAL
Tcirg1	1.82208e-08	1.14638	0.22	0.126	0.00043218
Elf3	2.00943e-08	1.62695	0.148	0.067	0.000476617
Misp	2.02954e-08	1.29197	0.184	0.098	0.000481387
Ano9	2.03224e-08	1.32753	0.142	0.061	0.000482027
Cx3cl1	2.29517e-08	1.202	0.185	0.096	0.000544392
Gm15614	2.30365e-08	1.00615	0.274	0.176	0.000546403
Ssbp4	2.90222e-08	1.30181	0.15	0.069	0.000688378
Krt8	2.92068e-08	1.00339	0.275	0.178	0.000692757
Fam124a	3.23663e-08	1.08588	0.253	0.158	0.000767697
Aqp2	4.55457e-08	1.37386	0.133	0.057	0.0010803
Ogfr	5.78295e-08	1.59711	0.117	0.046	0.00137166
Cacna2d3	5.91151e-08	1.25903	0.163	0.08	0.00140215
Gm26835	6.24741e-08	1.13229	0.235	0.144	0.00148182
Phlpp2	6.80469e-08	1.07328	0.176	0.09	0.001614
Gadd45a	8.9588e-08	1.10847	0.212	0.126	0.00212494
Plcg2	1.03001e-07	1.10923	0.158	0.077	0.00244308
Bax	1.07047e-07	1.09894	0.193	0.107	0.00253905
Gm11536	1.08184e-07	1.18249	0.195	0.11	0.00256602
Pgd	1.64271e-07	1.07668	0.206	0.119	0.00389635
Efcab5	1.74037e-07	1.36432	0.136	0.063	0.00412798
Abracl	1.99787e-07	1.32872	0.172	0.093	0.00473875
Cenpj	2.33181e-07	1.46795	0.118	0.049	0.00553081
Arsj	2.61819e-07	1.26944	0.189	0.109	0.00621007
Ctla4	2.75359e-07	1.11653	0.194	0.112	0.00653125
6530409C15Rik	3.61097e-07	1.3941	0.139	0.067	0.00856485
Slc12a2	4.02797e-07	1.21058	0.159	0.083	0.00955394
Lrrc8b	4.5074e-07	1.33319	0.142	0.07	0.0106911
Flot1	4.7115e-07	1.20449	0.153	0.078	0.0111752
Pim1	4.81845e-07	1.33563	0.137	0.066	0.0114289
Med7	5.15364e-07	1.00075	0.176	0.096	0.0122239
Ctsz	5.68111e-07	1.22945	0.185	0.11	0.013475
Rpl30	5.78264e-07	1.24354	0.174	0.1	0.0137158
Fam19a5	6.79755e-07	1.24606	0.144	0.072	0.0161231
Gm31683	7.13577e-07	1.67348	0.105	0.043	0.0169253
Slc37a1	8.00605e-07	1.13618	0.141	0.069	0.0189896
Rnd3	9.59024e-07	1.07281	0.205	0.126	0.0227471
Zfp36	1.00527e-06	1.38291	0.135	0.066	0.023844
Slx4	1.02754e-06	1.12078	0.153	0.08	0.0243723
Gm8186	1.1716e-06	1.13838	0.165	0.092	0.0277891
B4galnt1	1.29418e-06	1.11889	0.152	0.08	0.0306966
Col4a1	1.30077e-06	1.11807	0.228	0.15	0.030853
Psmg4	1.5735e-06	1.43508	0.115	0.052	0.0373219
Relb	1.94233e-06	1.18931	0.14	0.072	0.0460702
Prkd2	2.10319e-06	1.03295	0.149	0.078	0.0498856

## Sheet: TAL.bc.to.bl6
Table S2: Results from differential gene expression TCMR vs. Control
Differential expression was assessed using two-sided Wilcoxon rank-sum tests with Benjamini–Hochberg correction for multiple testing.
Thick ascending limbs			*This Fold Change was calculated between [BALB/c to C57BL/6 ] and [BALB/c to BALB/c]
Gene upr.	p_val	avg_log2FC*	pct.1	pct.2	p_val_adj				Gene downr.	p_val	avg_log2FC*	pct.1	pct.2	p_val_adj
Iigp1	0	10.9579	0.91	0.003	0				Gm26870	3.46197e-226	-4.38661	0.037	0.54	8.21144e-222
Cd74	0	5.87084	0.91	0.076	0				Egf	1.45103e-153	-2.22257	0.636	0.903	3.44169e-149
B2m	0	5.48505	0.993	0.165	0				Plekha6	1.21342e-144	-1.18917	0.708	0.935	2.8781e-140
H2-K1	0	5.38063	0.992	0.178	0				Gm14002	2.16838e-136	-1.60841	0.453	0.807	5.14318e-132
H2-D1	0	4.81532	0.995	0.24	0				Tef	2.21318e-127	-1.82066	0.218	0.626	5.24945e-123
Stat1	0	5.63814	0.833	0.08	0				Ryr2	7.99532e-124	-3.40719	0.097	0.446	1.89641e-119
Irgm1	0	5.59975	0.727	0.043	0				Gm26804	5.95931e-105	-1.11702	0.756	0.916	1.41349e-100
Gbp2b	0	7.33322	0.671	0.012	0				Gm42697	1.81266e-104	-2.87686	0.082	0.397	4.29946e-100
H2-Ab1	0	6.17576	0.669	0.02	0				Stxbp4	7.26582e-101	-1.10102	0.675	0.87	1.72338e-96
Tmsb4x	0	3.39439	0.909	0.316	0				Kcnt1	3.11316e-92	-1.87187	0.17	0.503	7.38411e-88
Ly6a	0	2.82149	0.971	0.454	0				Lrrc66	3.92979e-92	-1.55754	0.287	0.622	9.32107e-88
Spp1	0	2.69573	1	0.908	0				Dusp15	2.29894e-85	-2.38796	0.093	0.375	5.45286e-81
Psmb8	1.7786e-304	7.22762	0.636	0.01	4.21865e-300				Gm46124	1.98836e-83	-1.96599	0.176	0.482	4.71619e-79
Ly6e	1.00178e-299	4.74038	0.689	0.068	2.37611e-295				9030025P20Rik	7.28023e-78	-1.61038	0.247	0.549	1.7268e-73
H2-Eb1	6.93747e-279	5.89207	0.614	0.021	1.6455e-274				Gm19461	4.7845e-77	-1.49374	0.24	0.552	1.13484e-72
H2-Aa	2.18786e-264	5.67871	0.595	0.025	5.18939e-260				Gm47708	8.31409e-77	-1.93668	0.114	0.393	1.97202e-72
Ubd	1.74762e-261	9.53515	0.559	0.002	4.14519e-257				Egfl6	1.27535e-75	-1.35385	0.324	0.626	3.02501e-71
Irgm2	8.99204e-251	6.18696	0.568	0.021	2.13282e-246				Slc34a1	1.27193e-74	-1.53639	0.176	0.485	3.01689e-70
H2-T23	1.74435e-229	5.43888	0.539	0.025	4.13742e-225				Dnah11	6.08744e-72	-1.71836	0.2	0.488	1.44388e-67
Gbp7	7.06457e-222	5.6207	0.527	0.024	1.67565e-217				Gm2115	1.28421e-71	-2.60685	0.083	0.329	3.04602e-67
Tap1	5.95986e-200	5.96847	0.474	0.014	1.41362e-195				Npy	1.92072e-70	-2.60223	0.085	0.328	4.55577e-66
Actb	7.64623e-200	1.83068	0.889	0.558	1.81361e-195				Nr1d2	5.56282e-70	-1.11114	0.359	0.664	1.31945e-65
Tnfsf10	3.15785e-199	2.26328	0.795	0.423	7.4901e-195				Wfdc15b	8.94989e-70	-1.15632	0.508	0.765	2.12282e-65
Nlrc5	1.09924e-197	4.45094	0.515	0.046	2.60729e-193				Gm17276	1.35062e-68	-1.08167	0.513	0.753	3.20354e-64
Pigr	4.86949e-197	3.33182	0.594	0.109	1.15499e-192				Gm26892	1.34439e-63	-1.48414	0.174	0.446	3.18876e-59
H2-Q4	8.52835e-190	5.62865	0.459	0.016	2.02284e-185				Gm44588	3.17135e-63	-1.65083	0.274	0.533	7.52213e-59
Psmb9	1.25624e-189	6.21408	0.451	0.011	2.97968e-185				1110019B22Rik	1.96694e-62	-2.11173	0.072	0.294	4.66539e-58
Gm16685	4.34925e-189	2.32134	0.75	0.318	1.0316e-184				Snap91	4.5885e-62	-1.80217	0.145	0.401	1.08835e-57
Bst2	7.44406e-189	3.77066	0.536	0.073	1.76566e-184				Gm36388	1.98187e-57	-1.30011	0.411	0.66	4.7008e-53
Olfr56	1.47048e-183	6.85454	0.438	0.011	3.48783e-179				Filip1l	1.54148e-56	-1.02522	0.523	0.738	3.65624e-52
Parp14	5.82302e-180	5.31711	0.457	0.027	1.38116e-175				Ralyl	2.08234e-56	-1.44663	0.245	0.495	4.9391e-52
Fth1	9.45313e-179	1.1337	0.988	0.855	2.24219e-174				Fam196a	7.50016e-56	-1.35978	0.248	0.508	1.77896e-51
Tap2	8.48877e-173	3.79547	0.495	0.059	2.01345e-168				4732465J04Rik	4.3604e-55	-1.14461	0.318	0.581	1.03424e-50
Ifitm3	2.31063e-171	4.43274	0.458	0.035	5.48059e-167				Pdzrn4	1.2681e-51	-1.71366	0.113	0.327	3.00781e-47
Gbp2	3.27078e-168	9.7303	0.393	0.001	7.75796e-164				Gm47719	2.52813e-51	-2.38407	0.042	0.216	5.99646e-47
Irf1	6.39019e-168	4.56177	0.468	0.05	1.51569e-163				Cntd1	4.0524e-51	-1.63825	0.104	0.317	9.61188e-47
Tapbp	2.35499e-167	2.56177	0.636	0.209	5.5858e-163				Pdgfc	1.31644e-50	-1.16856	0.293	0.544	3.12247e-46
Tmem176a	2.8379e-158	1.67884	0.826	0.513	6.73121e-154				Nat8f1	3.26069e-50	-1.68991	0.077	0.278	7.73404e-46
AW112010	3.591e-152	8.12628	0.364	0.003	8.51749e-148				Gm49272	3.32093e-50	-1.16822	0.191	0.44	7.8769e-46
Gm4951	4.28744e-144	7.98308	0.35	0.004	1.01694e-139				Gm15261	1.38305e-49	-1.10846	0.421	0.653	3.28045e-45
Oasl2	8.08602e-141	6.06104	0.353	0.008	1.91792e-136				Miox	1.40184e-49	-1.11634	0.156	0.405	3.32503e-45
Naaladl2	4.92497e-140	1.88446	0.746	0.404	1.16815e-135				Usp2	1.78226e-49	-1.14754	0.211	0.465	4.22735e-45
Tmem176b	6.16517e-139	1.5712	0.786	0.51	1.46232e-134				Gm33543	7.48933e-49	-2.38584	0.038	0.202	1.77639e-44
Cd52	9.30141e-135	5.81626	0.347	0.012	2.2062e-130				Kcnn2	2.46381e-48	-1.05119	0.316	0.56	5.8439e-44
Cd274	2.91763e-130	5.01621	0.372	0.033	6.92032e-126				Tsga10	2.84375e-48	-1.50239	0.155	0.377	6.7451e-44
H2-T22	5.49483e-130	3.8844	0.394	0.045	1.30332e-125				Dbp	3.87912e-48	-1.78375	0.069	0.256	9.20089e-44
Tmsb10	3.1171e-126	3.8061	0.388	0.046	7.39345e-122				Notch3	5.84543e-48	-1.54542	0.11	0.32	1.38648e-43
Lcn2	1.60996e-123	4.05755	0.367	0.035	3.81865e-119				Gm36975	7.63316e-48	-1.38275	0.219	0.451	1.81051e-43
Stat2	4.00319e-123	2.99027	0.469	0.112	9.49517e-119				Ckb	9.98677e-48	-1.04161	0.451	0.681	2.36876e-43
Gm26917	4.77766e-119	1.20005	0.858	0.736	1.13321e-114				Tbxas1	1.66006e-47	-1.528	0.164	0.387	3.9375e-43
Gbp3	5.0041e-119	6.03408	0.305	0.006	1.18692e-114				Mapk15	8.06223e-47	-1.17564	0.184	0.417	1.91228e-42
Eef1a1	2.77027e-118	1.02151	0.932	0.807	6.57081e-114				Ano4	1.13701e-46	-1.28509	0.362	0.578	2.69686e-42
Cxcl10	8.44573e-118	6.49829	0.3	0.005	2.00324e-113				Dnase1	3.48082e-46	-3.22928	0.016	0.152	8.25615e-42
Rps20	7.80174e-115	1.30396	0.802	0.545	1.85049e-110				Ybx2	3.24264e-45	-2.0379	0.055	0.226	7.69122e-41
Tpt1	4.14428e-113	1.0586	0.895	0.703	9.82982e-109				Adhfe1	4.6643e-45	-1.22911	0.188	0.414	1.10633e-40
Rplp1	1.10863e-110	1.33967	0.784	0.494	2.62956e-106				Gm15640	3.12709e-43	-1.65715	0.103	0.292	7.41714e-39
Rnf213	1.40239e-109	2.33662	0.555	0.224	3.32632e-105				Prox1	4.04819e-43	-1.09107	0.368	0.579	9.60191e-39
Psmb10	5.21849e-109	4.37796	0.32	0.026	1.23777e-104				AI838599	5.72336e-43	-1.20638	0.251	0.476	1.35752e-38
H2-Q7	8.64829e-109	7.41325	0.274	0.003	2.05129e-104				Mgll	1.92843e-42	-1.336	0.111	0.305	4.57405e-38
F830016B08Rik	4.14192e-106	8.00595	0.267	0.002	9.82422e-102				Gm48321	3.15442e-42	-1.38212	0.141	0.346	7.48196e-38
Adamts1	3.70253e-103	4.0533	0.347	0.051	8.78204e-99				Prkd1	4.26764e-42	-1.25936	0.573	0.75	1.01224e-37
Lyz2	7.83801e-102	4.83019	0.288	0.016	1.8591e-97				Myo3a	5.06029e-42	-1.53648	0.109	0.3	1.20025e-37
S100a11	4.25354e-94	1.6381	0.626	0.332	1.0089e-89				Abca2	3.4481e-40	-1.04317	0.211	0.435	8.17854e-36
Rpsa	4.36686e-94	1.27155	0.747	0.48	1.03578e-89				Robo3	1.14401e-39	-3.50382	0.013	0.129	2.71348e-35
Gm10073	4.71401e-93	1.28218	0.757	0.506	1.11812e-88				Fgf9	1.27877e-39	-1.29502	0.234	0.447	3.03312e-35
Rpl32	1.04921e-92	1.1901	0.774	0.517	2.48863e-88				6330410L21Rik	2.01571e-39	-1.90049	0.05	0.202	4.78106e-35
Gm12216	1.26784e-92	2.36726	0.431	0.122	3.00719e-88				AC153364.1	3.09593e-38	-1.08257	0.237	0.453	7.34324e-34
Ccl5	1.00476e-91	5.92524	0.244	0.006	2.38319e-87				Gm45650	1.50773e-37	-2.57481	0.027	0.152	3.57617e-33
Herc6	8.09869e-89	2.76271	0.41	0.122	1.92093e-84				Gm31224	2.53397e-37	-1.33414	0.183	0.379	6.01032e-33
Gm4841	5.68908e-87	9.24763	0.221	0.001	1.34939e-82				Gm42650	3.63704e-37	-2.90735	0.023	0.142	8.6267e-33
Parp9	9.00165e-85	2.66909	0.386	0.106	2.1351e-80				Mecomos	1.97268e-36	-1.15855	0.182	0.382	4.679e-32
Gm12185	1.52334e-83	5.69244	0.226	0.006	3.61321e-79				Ttr	2.64387e-36	-3.53624	0.006	0.104	6.27099e-32
Ddx58	5.09871e-83	2.52207	0.37	0.094	1.20936e-78				Mef2c	2.87086e-36	-1.16501	0.184	0.378	6.8094e-32
Nuak2	8.97392e-83	1.55104	0.684	0.43	2.12852e-78				0610005C13Rik	5.91015e-36	-1.13294	0.127	0.312	1.40183e-31
Rpl27a	1.2487e-79	1.35846	0.662	0.415	2.9618e-75				Per2	1.04711e-35	-1.26312	0.119	0.296	2.48364e-31
Rps19	5.70194e-79	1.27594	0.664	0.403	1.35244e-74				Gm49380	1.15591e-35	-1.31421	0.1	0.273	2.74171e-31
Tgtp2	6.98555e-79	9.73374	0.201	0	1.6569e-74				Gm26776	3.31593e-35	-2.39216	0.04	0.171	7.86504e-31
Serping1	7.74989e-78	5.24804	0.218	0.009	1.8382e-73				Gcgr	9.09359e-35	-1.19797	0.188	0.379	2.15691e-30
Stat3	2.1099e-77	1.1438	0.741	0.533	5.00447e-73				Gatm	1.72314e-34	-1.44582	0.076	0.233	4.08712e-30
C3	2.39584e-77	4.19873	0.238	0.019	5.6827e-73				Pantr1	8.95187e-34	-1.06502	0.178	0.37	2.12329e-29
Napsa	3.78795e-77	1.05937	0.779	0.553	8.98464e-73				Klhl3	9.32613e-34	-1.10272	0.184	0.375	2.21207e-29
Rps27rt	4.06503e-77	1.13558	0.73	0.487	9.64184e-73				1700126G02Rik	4.1654e-33	-1.07738	0.23	0.424	9.87991e-29
Vcam1	1.90295e-75	5.58635	0.206	0.006	4.51362e-71				Gm4524	4.74658e-33	-2.15611	0.036	0.159	1.12584e-28
Wdr89	8.86192e-75	1.03465	0.756	0.539	2.10196e-70				Glycam1	6.42396e-33	-1.94462	0.046	0.175	1.5237e-28
Sh3bgrl3	1.11721e-74	3.35007	0.278	0.046	2.64992e-70				Esam	1.03975e-32	-1.39066	0.088	0.244	2.46618e-28
Spns2	6.23385e-73	2.33309	0.377	0.118	1.47861e-68				Ccdc3	3.03037e-32	-1.47025	0.095	0.249	7.18773e-28
Rpl14	2.84988e-72	1.19083	0.696	0.454	6.75962e-68				Gm12326	7.73317e-32	-2.28393	0.03	0.143	1.83423e-27
Ifi44	3.14388e-71	5.58185	0.197	0.006	7.45696e-67				Ptgds	8.87447e-32	-1.36044	0.085	0.238	2.10494e-27
Gm20663	6.07717e-69	2.64592	0.363	0.12	1.44144e-64				Pard3bos1	2.22646e-31	-1.25151	0.173	0.348	5.28093e-27
Ifi27	1.62297e-68	1.56619	0.527	0.275	3.84951e-64				Slc26a10	4.35836e-31	-2.26633	0.038	0.155	1.03376e-26
Clu	3.49873e-68	2.02862	0.425	0.164	8.29865e-64				9630028H03Rik	6.72324e-31	-1.40275	0.176	0.345	1.59469e-26
Cxcl9	8.49954e-68	6.70313	0.178	0.001	2.016e-63				Car4	7.35843e-31	-1.12803	0.168	0.343	1.74535e-26
Calr	3.93898e-67	1.20506	0.662	0.445	9.34286e-63				Rph3a	8.30244e-31	-1.39872	0.069	0.21	1.96926e-26
Patl2	5.67729e-67	4.08585	0.219	0.022	1.3466e-62				Gm31763	1.59269e-30	-1.04542	0.23	0.413	3.7777e-26
Akt3	8.10564e-65	1.9763	0.412	0.16	1.92258e-60				A330032B11Rik	1.85014e-30	-1.26232	0.134	0.296	4.38835e-26
H2-Q6	9.74028e-65	6.03971	0.176	0.004	2.3103e-60				Gm16000	1.89955e-30	-2.06831	0.035	0.149	4.50554e-26
Nrg1	1.29856e-64	1.13148	0.763	0.586	3.08005e-60				Ces1d	2.85313e-30	-2.85623	0.013	0.105	6.76734e-26
Xaf1	1.00293e-63	4.11262	0.197	0.014	2.37884e-59				Rtl4	1.12464e-29	-2.30546	0.062	0.189	2.66753e-25
Dcdc2a	2.73129e-63	2.89206	0.312	0.087	6.47835e-59				Dhx34	2.42039e-29	-1.19545	0.119	0.276	5.74092e-25
Clec2d	3.00546e-63	1.2186	0.706	0.559	7.12865e-59				Mkln1os	4.4518e-29	-1.09918	0.144	0.311	1.05592e-24
Pla2g16	3.16553e-63	3.23146	0.244	0.04	7.50832e-59				Acaa1b	4.88756e-29	-1.8857	0.035	0.147	1.15928e-24
Nmi	4.80876e-62	2.44363	0.325	0.099	1.14059e-57				Fam81a	8.54721e-28	-1.05919	0.148	0.31	2.02731e-23
Gm6034	4.34611e-61	3.82971	0.202	0.02	1.03085e-56				Gm13546	9.81081e-28	-1.97048	0.038	0.147	2.32703e-23
Rtp4	6.92088e-61	4.23794	0.188	0.013	1.64156e-56				Slc8a1	2.15819e-27	-1.14317	0.069	0.2	5.11901e-23
Nfkbiz	5.34941e-59	1.9954	0.439	0.218	1.26883e-54				Gm28410	2.48452e-27	-1.86155	0.04	0.15	5.89304e-23
Rpl9-ps6	2.41323e-57	1.0048	0.713	0.521	5.72394e-53				Atp6v1c2	5.86961e-27	-1.37494	0.105	0.245	1.39221e-22
Irf7	6.94858e-57	5.44516	0.16	0.005	1.64813e-52				Ipcef1	8.95025e-27	-1.30242	0.141	0.291	2.12291e-22
Rps27a	2.01259e-56	1.11135	0.661	0.464	4.77366e-52				Igf1	1.03194e-26	-1.79241	0.047	0.159	2.44765e-22
Rps23	8.48689e-56	1.14772	0.63	0.427	2.01301e-51				Afm	1.65356e-26	-1.68212	0.051	0.166	3.92208e-22
C1qb	1.76021e-55	5.94745	0.155	0.004	4.17504e-51				Rdh16f2	3.05214e-26	-1.2735	0.054	0.173	7.23937e-22
S100a10	2.11814e-55	1.96728	0.371	0.15	5.02401e-51				Pah	7.77842e-26	-1.06541	0.143	0.298	1.84496e-21
Atp11a	2.25406e-54	1.34457	0.603	0.424	5.34639e-50				Slc47a1	1.27538e-25	-1.20736	0.087	0.221	3.02507e-21
Ifi44l	3.26909e-54	5.29829	0.151	0.004	7.75396e-50				Slc22a8	1.41433e-25	-1.8421	0.023	0.114	3.35464e-21
Rasgrp1	4.94005e-54	1.47272	0.536	0.329	1.17173e-49				Gm15638	2.27589e-25	-1.52877	0.059	0.174	5.39818e-21
Rpl27-ps3	5.51747e-54	1.03316	0.66	0.445	1.30869e-49				Gm17359	2.39516e-25	-1.3622	0.097	0.231	5.68108e-21
Samhd1	5.93154e-54	2.11527	0.374	0.156	1.4069e-49				Rorc	3.07616e-25	-1.06078	0.129	0.276	7.29633e-21
Casp12	6.26464e-54	5.21027	0.154	0.006	1.48591e-49				Slc5a12	4.22807e-25	-2.01525	0.026	0.119	1.00286e-20
Isg15	1.03794e-53	3.8303	0.177	0.016	2.4619e-49				Mroh4	5.41921e-25	-2.18867	0.021	0.109	1.28538e-20
Epsti1	4.62613e-53	2.27872	0.285	0.083	1.09727e-48				Gm42962	1.60989e-24	-1.46839	0.069	0.187	3.8185e-20
Parp10	2.64373e-52	2.18432	0.301	0.097	6.27066e-48				Ggnbp1	1.70846e-24	-1.00359	0.14	0.288	4.05228e-20
Psme1	3.61886e-52	1.7869	0.386	0.166	8.58358e-48				Iqcm	3.35589e-24	-2.5514	0.02	0.104	7.95983e-20
Plac8	8.1607e-52	4.50469	0.159	0.01	1.93564e-47				Gabrr2	1.25268e-23	-1.84005	0.026	0.115	2.97123e-19
Mt1	8.88209e-52	1.01087	0.742	0.585	2.10674e-47				4930517O19Rik	1.43496e-23	-1.01267	0.141	0.285	3.40357e-19
Rpl22	1.30369e-51	1.26889	0.538	0.328	3.09223e-47				Ackr4	2.06031e-23	-1.26861	0.113	0.245	4.88685e-19
C1qa	1.8188e-51	5.50819	0.145	0.004	4.31402e-47				Pck1	2.74534e-23	-1.02098	0.089	0.221	6.51168e-19
Rpl18	1.84736e-51	1.044	0.657	0.482	4.38174e-47				Gm29266	2.97306e-23	-2.15022	0.037	0.131	7.05179e-19
Gbp5	3.15071e-51	6.63398	0.14	0.003	7.47318e-47				Ring1	4.82776e-23	-1.05077	0.105	0.236	1.1451e-18
Rps4x	3.3674e-50	1.14126	0.577	0.37	7.98713e-46				D430001F17Rik	3.3455e-22	-1.69558	0.042	0.137	7.93519e-18
C4b	1.20682e-49	3.95155	0.162	0.014	2.86246e-45				Hoxaas3	3.48913e-22	-1.0042	0.129	0.265	8.27586e-18
Id2	3.20092e-49	1.31483	0.585	0.416	7.59225e-45				1700085D07Rik	5.56936e-22	-1.45852	0.062	0.169	1.321e-17
Erap1	3.63173e-49	1.94322	0.314	0.112	8.61409e-45				1810062O18Rik	1.06221e-21	-1.2522	0.09	0.208	2.51945e-17
Ndrg1	2.76329e-48	1.41958	0.491	0.283	6.55424e-44				Stpg2	1.39848e-21	-1.36196	0.063	0.169	3.31704e-17
Pfn1	6.80443e-47	1.30703	0.516	0.313	1.61394e-42				Pcx	3.07394e-21	-1.10063	0.1	0.221	7.29109e-17
Dtx3l	1.14112e-46	3.78993	0.162	0.018	2.70662e-42				C230037L18Rik	3.20003e-21	-1.0628	0.103	0.226	7.59015e-17
H2-DMa	1.72044e-46	4.03216	0.148	0.011	4.0807e-42				Pex5l	3.95465e-21	-1.49322	0.089	0.203	9.38004e-17
Havcr1	1.08009e-45	3.66965	0.159	0.018	2.56188e-41				Oprm1	5.71938e-21	-1.38464	0.086	0.198	1.35658e-16
Hbb-bs	1.96435e-45	5.05017	0.121	0.001	4.65924e-41				BB365896	7.32211e-21	-1.8438	0.032	0.117	1.73673e-16
Lgals3	6.16789e-45	1.64638	0.401	0.197	1.46296e-40				Slc5a2	1.24818e-19	-1.23382	0.042	0.131	2.96056e-15
Tspo	1.01104e-44	1.30556	0.467	0.259	2.39808e-40				Neu2	2.21983e-19	-1.10718	0.099	0.213	5.26522e-15
Mt2	2.27556e-44	1.79969	0.324	0.127	5.3974e-40				Mettl23	2.35543e-19	-1.08657	0.111	0.229	5.58684e-15
Txn1	2.58461e-44	1.38572	0.455	0.259	6.13043e-40				Prox1os	2.54037e-19	-1.27639	0.074	0.178	6.02549e-15
Idnk	1.12661e-43	1.84015	0.31	0.123	2.67221e-39				Gm43915	3.12744e-19	-1.11005	0.094	0.206	7.41798e-15
Lgals1	2.9836e-43	2.67521	0.213	0.053	7.0768e-39				Cry2	3.15361e-19	-1.05497	0.077	0.183	7.48005e-15
Rpl17	3.03925e-43	1.07464	0.57	0.39	7.20879e-39				Gm26816	3.31435e-19	-1.01673	0.107	0.225	7.86131e-15
S100a6	3.50749e-43	1.8724	0.362	0.165	8.31942e-39				Gm11713	4.93229e-19	-1.13086	0.079	0.183	1.16989e-14
Rps5	3.86081e-43	1.17734	0.52	0.336	9.15745e-39				Gm10848	5.09407e-19	-1.34592	0.064	0.161	1.20826e-14
Ubc	7.02865e-43	1.03115	0.617	0.449	1.66712e-38				AC161607.1	1.04368e-18	-1.03892	0.103	0.215	2.47549e-14
Rpl39	1.61962e-42	1.38495	0.441	0.242	3.84158e-38				B3galt2	1.63959e-18	-1.14048	0.083	0.189	3.88895e-14
Zbp1	2.56327e-42	6.7752	0.113	0.001	6.07982e-38				E530011L22Rik	5.37065e-18	-1.07343	0.088	0.194	1.27386e-13
Rpl4	3.89602e-42	1.2536	0.495	0.307	9.24096e-38				3200001D21Rik	9.23681e-18	-1.41347	0.04	0.122	2.19088e-13
Mpeg1	4.22006e-42	5.44021	0.118	0.003	1.00096e-37				Htr1b	9.70063e-18	-1.43148	0.035	0.113	2.30089e-13
Ctss	6.90022e-42	4.88057	0.126	0.007	1.63666e-37				Gm13844	1.05368e-17	-1.33148	0.05	0.137	2.49923e-13
AU020206	2.54945e-41	7.04834	0.111	0.001	6.04704e-37				Itgae	4.86512e-17	-1.13335	0.053	0.14	1.15396e-12
Msn	2.42967e-39	1.11978	0.525	0.345	5.76294e-35				Gm10635	9.10802e-17	-1.68617	0.032	0.105	2.16033e-12
Dysf	3.78456e-39	1.1198	0.536	0.355	8.9766e-35				Il17rb	1.31131e-16	-1.52283	0.036	0.111	3.1103e-12
Ddx60	8.15472e-39	4.23063	0.127	0.011	1.93422e-34				Gm20721	1.69857e-16	-1.30176	0.048	0.13	4.02884e-12
Gbp8	1.10088e-38	5.19015	0.113	0.004	2.61119e-34				Gm9968	1.71431e-16	-1.4698	0.049	0.131	4.06617e-12
Upp1	2.11219e-38	2.41474	0.188	0.044	5.0099e-34				C230088H06Rik	2.35627e-16	-1.11762	0.081	0.176	5.58883e-12
Socs1	2.27003e-38	5.80206	0.109	0.003	5.38428e-34				Gm26613	2.5094e-16	-1.17961	0.061	0.148	5.95206e-12
Vim	4.84099e-38	4.22619	0.124	0.01	1.14823e-33				Syt16	2.88124e-16	-1.16128	0.074	0.166	6.83402e-12
Mgp	1.14647e-37	2.93539	0.163	0.031	2.71931e-33				Gpx6	8.84004e-16	-1.29727	0.04	0.114	2.09677e-11
Tapbpl	1.16004e-37	3.38168	0.139	0.018	2.75151e-33				Gm34868	1.24645e-15	-1.20251	0.076	0.166	2.95645e-11
Fbxw17	1.65119e-37	2.24063	0.211	0.061	3.91645e-33				Pes1	1.61295e-15	-1.00374	0.08	0.173	3.82575e-11
Tgm2	4.33344e-37	2.82858	0.166	0.034	1.02785e-32				Wnk1	1.92975e-15	-1.25319	0.718	0.826	4.57717e-11
Rpl29	5.37986e-37	4.01668	0.122	0.011	1.27605e-32				Tmem207	1.9647e-15	-1.48227	0.276	0.358	4.66007e-11
Tubb5	1.32159e-36	2.19487	0.218	0.067	3.13469e-32				4930533B01Rik	2.08933e-15	-1.35668	0.05	0.128	4.95569e-11
Rack1	1.59721e-36	1.01241	0.543	0.373	3.78841e-32				Gm42397	2.41477e-15	-1.77952	0.039	0.111	5.72758e-11
Ifi27l2a	2.38765e-35	3.4991	0.128	0.015	5.66326e-31				Gm33023	4.06786e-15	-1.43126	0.04	0.113	9.64855e-11
Tyrobp	4.83937e-35	4.69565	0.107	0.006	1.14785e-30				Emc9	4.89436e-15	-1.23003	0.046	0.122	1.16089e-10
Clic1	1.17024e-34	1.11401	0.488	0.318	2.77569e-30				Hsd17b14	8.99657e-15	-1.11208	0.05	0.128	2.1339e-10
Adgrg3	2.18195e-34	1.63495	0.333	0.168	5.17537e-30				Gm14532	1.08613e-14	-1.17145	0.045	0.119	2.57618e-10
Gm7030	2.36671e-33	3.7066	0.113	0.011	5.61359e-29				Gm48287	1.50978e-14	-1.35025	0.037	0.106	3.58104e-10
Cyba	1.17706e-32	1.35115	0.409	0.248	2.79188e-28				Bcas3os1	2.2639e-14	-1.0907	0.07	0.154	5.36974e-10
Cd47	1.72213e-32	1.01701	0.547	0.394	4.08472e-28				Gm45846	3.97075e-14	-1.34088	0.067	0.147	9.41822e-10
Rpl18a	5.12955e-32	1.09468	0.47	0.304	1.21668e-27				Kcnj13	5.64981e-14	-1.06343	0.074	0.159	1.34008e-09
Ifih1	6.26902e-32	2.34427	0.158	0.036	1.48695e-27				Gm39214	7.17818e-14	-1.07159	0.057	0.134	1.70259e-09
Acsl5	1.23352e-31	1.28384	0.362	0.195	2.92577e-27				Trdn	1.91273e-13	-1.39037	0.039	0.105	4.53681e-09
Parp12	1.56071e-31	1.13984	0.424	0.257	3.70186e-27				Gm28379	9.55781e-13	-1.08822	0.055	0.127	2.26702e-08
Zc3hav1	1.96391e-31	1.95494	0.187	0.054	4.65819e-27				Ttn	1.67435e-12	-1.06408	0.065	0.14	3.97139e-08
Cstb	2.18964e-31	1.53496	0.324	0.169	5.1936e-27				Kmo	2.19662e-12	-1.07389	0.046	0.112	5.21017e-08
Lgals3bp	4.55851e-31	2.89674	0.129	0.021	1.08123e-26				Kifc2	2.34895e-12	-1.02334	0.049	0.117	5.57146e-08
Rps11	7.92274e-31	1.03548	0.494	0.334	1.87919e-26				D530033B14Rik	2.71389e-12	-1.21867	0.039	0.101	6.43707e-08
Rpl21	9.00615e-31	2.60926	0.163	0.043	2.13617e-26				Disc1	2.72157e-12	-1.23446	0.042	0.106	6.45529e-08
Serpina10	9.08095e-31	3.12602	0.13	0.023	2.15391e-26				C730034F03Rik	3.57102e-12	-1.15872	0.04	0.103	8.47009e-08
Unc93b1	9.70159e-31	1.65762	0.244	0.097	2.30112e-26				Fhitos	6.90212e-12	-1.03754	0.057	0.126	1.63711e-07
Tsc22d1	1.12772e-30	1.22181	0.457	0.305	2.67483e-26				Gm10501	1.05433e-11	-1.21745	0.041	0.102	2.50075e-07
Trim12c	1.13902e-30	1.63957	0.262	0.112	2.70163e-26				Frmpd4	1.11943e-11	-1.12133	0.04	0.101	2.65517e-07
S100a4	3.86939e-30	3.48894	0.112	0.015	9.17782e-26				Gm28048	4.94087e-11	-1.23209	0.042	0.101	1.17193e-06
Tmem140	4.93042e-29	2.79199	0.128	0.024	1.16945e-24				Sned1	6.66994e-11	-1.05079	0.122	0.203	1.58204e-06
Arap2	1.56082e-28	1.58617	0.275	0.13	3.70212e-24				4921507P07Rik	1.38997e-10	-1.03671	0.043	0.101	3.29687e-06
Il18bp	1.04397e-27	2.49484	0.15	0.04	2.47619e-23				Bmp5	1.09535e-09	-1.05387	0.065	0.127	2.59805e-05
Ifit1	4.31975e-27	3.04333	0.12	0.023	1.0246e-22				Cables1	1.38599e-08	-1.03534	0.075	0.135	0.000328743
Dynll1	4.34516e-27	1.32685	0.331	0.185	1.03063e-22				Gm6994	4.03319e-08	-1.2047	0.102	0.164	0.000956631
Ciita	7.3957e-27	3.07855	0.105	0.015	1.75419e-22				Gm49003	1.411e-06	-1.0895	0.095	0.147	0.0334676
Ppa1	2.01136e-26	1.87176	0.192	0.07	4.77073e-22
Serpinb9	5.22209e-26	2.65689	0.116	0.022	1.23863e-21
Irf9	6.17248e-26	1.57379	0.219	0.09	1.46405e-21
Gm44148	1.29568e-25	1.79704	0.176	0.059	3.07322e-21
Rps12-ps3	2.35099e-25	1.2223	0.355	0.211	5.57631e-21
Mlkl	1.66194e-24	2.70235	0.108	0.02	3.94196e-20
Clic4	7.15679e-24	1.29826	0.318	0.181	1.69752e-19
Pomp	6.83413e-23	1.43189	0.265	0.139	1.62099e-18
Jun	1.62176e-22	1.63357	0.228	0.107	3.84665e-18
Pea15a	1.98164e-22	1.18948	0.356	0.222	4.70026e-18
Pabpc1	4.67363e-22	1.00349	0.395	0.265	1.10854e-17
Fcer1g	5.34564e-22	2.68456	0.105	0.023	1.26793e-17
Guca2b	5.70401e-22	1.43188	0.25	0.129	1.35293e-17
Sipa1l1	7.76789e-22	1.1934	0.336	0.206	1.84246e-17
Arpc1b	1.19664e-21	1.67367	0.17	0.064	2.8383e-17
Cfl1	4.91473e-21	1.24446	0.311	0.186	1.16572e-16
Col18a1	5.96066e-21	1.02332	0.392	0.266	1.41381e-16
Kcnh1	7.36069e-21	2.33653	0.137	0.045	1.74588e-16
Mitd1	2.26663e-20	1.25766	0.24	0.121	5.37622e-16
Arntl	3.84137e-20	2.23417	0.12	0.035	9.11134e-16
Syt2	5.84293e-20	2.13479	0.126	0.039	1.38589e-15
Apoe	5.86419e-20	1.07745	0.355	0.229	1.39093e-15
Tuba1b	7.01136e-20	1.53277	0.202	0.093	1.66302e-15
Tagln2	9.06906e-20	2.00754	0.141	0.049	2.15109e-15
Rnf19b	2.9898e-19	1.59978	0.195	0.09	7.0915e-15
Stxbp1	1.15509e-18	1.32082	0.235	0.124	2.73976e-14
Vwa5a	3.10245e-18	1.3489	0.224	0.116	7.3587e-14
Cxcl16	3.10694e-18	1.57711	0.194	0.094	7.36935e-14
Tinagl1	5.23905e-18	1.29878	0.237	0.13	1.24265e-13
Pycard	5.51211e-18	1.77829	0.134	0.048	1.30742e-13
Kank3	9.22212e-18	2.03125	0.113	0.035	2.18739e-13
Efhd2	1.27735e-17	2.17157	0.117	0.039	3.02975e-13
Tubb2b	1.33608e-17	1.79301	0.144	0.057	3.16905e-13
Lap3	1.82928e-17	1.26335	0.241	0.135	4.33887e-13
Ctsl	3.33273e-17	1.35578	0.303	0.195	7.90491e-13
Atp6v0d2	4.98017e-17	1.15965	0.157	0.064	1.18125e-12
Gm10076	2.29358e-16	1.29725	0.226	0.126	5.44013e-12
Tnfrsf12a	3.3957e-16	1.90756	0.133	0.052	8.05426e-12
Psma5	4.39741e-16	1.15973	0.232	0.129	1.04302e-11
Zscan21	2.29025e-15	1.04876	0.328	0.224	5.43225e-11
Gnai2	3.81354e-15	1.18158	0.237	0.138	9.04534e-11
Aprt	4.41087e-15	1.37689	0.188	0.098	1.04621e-10
Arpc3	6.30372e-15	1.03813	0.302	0.202	1.49518e-10
Myl12a	7.26737e-15	1.08893	0.289	0.189	1.72375e-10
Arhgap8	1.09866e-14	1.44559	0.151	0.068	2.60591e-10
Hnf4g	2.07605e-14	1.80828	0.135	0.058	4.92419e-10
Tpm4	2.78294e-14	1.56593	0.128	0.052	6.60086e-10
Plekha2	3.28713e-14	1.44723	0.149	0.068	7.79674e-10
Cdh3	4.35381e-14	1.08007	0.236	0.139	1.03268e-09
Cenpj	5.76528e-14	1.58104	0.113	0.043	1.36747e-09
Csrp1	7.82285e-14	1.741	0.111	0.042	1.8555e-09
Cotl1	1.133e-13	1.89968	0.113	0.045	2.68737e-09
Cldn2	1.15635e-13	1.70222	0.126	0.054	2.74274e-09
Stk32a	2.38649e-13	1.55446	0.125	0.053	5.66051e-09
Cp	2.48889e-13	1.68435	0.128	0.056	5.9034e-09
Rbl1	4.03099e-13	1.36647	0.156	0.077	9.5611e-09
Ogfr	7.23745e-13	1.87282	0.104	0.04	1.71665e-08
Krt8	8.81698e-13	1.23818	0.242	0.155	2.0913e-08
Ucp2	9.3029e-13	1.65972	0.126	0.057	2.20655e-08
Ctps	1.16911e-12	1.14976	0.208	0.122	2.77302e-08
Baz1a	1.65017e-12	1.11322	0.219	0.133	3.91403e-08
Slc6a6	1.67038e-12	1.36537	0.193	0.113	3.96199e-08
Tmem37	1.80991e-12	1.26069	0.171	0.092	4.29293e-08
Ctsz	2.03288e-12	1.43276	0.153	0.078	4.82178e-08
Ifi35	2.35533e-12	1.08915	0.19	0.106	5.5866e-08
Rps18	3.48764e-12	1.51739	0.143	0.071	8.27233e-08
Sec61b	3.97963e-12	1.10857	0.221	0.137	9.43927e-08
Trim25	5.5506e-12	1.39638	0.15	0.077	1.31655e-07
Abracl	6.12335e-12	1.42489	0.161	0.087	1.4524e-07
Fgd3	6.2432e-12	1.46894	0.177	0.101	1.48082e-07
Capg	8.11315e-12	1.27331	0.148	0.075	1.92436e-07
Astn2	1.26673e-11	1.63178	0.268	0.192	3.00456e-07
Gm20696	1.74691e-11	1.04884	0.247	0.164	4.14351e-07
Gdf15	1.90933e-11	1.77762	0.105	0.044	4.52874e-07
Gm8186	1.91098e-11	1.1798	0.182	0.104	4.53264e-07
Ftl1-ps1	2.41992e-11	1.25902	0.181	0.106	5.7398e-07
Tbrg1	2.5627e-11	1.14497	0.182	0.106	6.07846e-07
Tubb2a	2.90429e-11	1.14949	0.173	0.097	6.88869e-07
Kars	2.98331e-11	1.38082	0.133	0.066	7.07611e-07
A230050P20Rik	3.72634e-11	1.42255	0.115	0.052	8.83852e-07
Selenow	4.2365e-11	1.21798	0.201	0.125	1.00486e-06
Shisa5	7.06235e-11	1.10524	0.207	0.129	1.67512e-06
Ifit2	8.78345e-11	1.17962	0.227	0.148	2.08335e-06
Ctla4	9.1641e-11	1.16743	0.16	0.088	2.17363e-06
Ywhah	2.24741e-10	1.0315	0.172	0.1	5.33063e-06
Cndp2	2.25776e-10	1.08745	0.206	0.131	5.35518e-06
Fhl2	2.28114e-10	1.32306	0.167	0.097	5.41064e-06
Phactr1	2.2991e-10	1.10276	0.151	0.082	5.45323e-06
Thsd7a	2.55244e-10	1.64305	0.125	0.064	6.05414e-06
Svil	3.08524e-10	1.08058	0.165	0.094	7.31787e-06
Jpt1	5.41397e-10	1.60058	0.11	0.052	1.28414e-05
Fmnl3	1.50681e-09	1.03769	0.164	0.096	3.57399e-05
Nova1	1.90369e-09	1.37491	0.116	0.058	4.51536e-05
Hbegf	4.3174e-09	1.51777	0.113	0.057	0.000102404
Rpl12	4.55171e-09	1.07745	0.172	0.106	0.000107962
S100a16	6.28567e-09	1.38707	0.109	0.054	0.00014909
Rps6ka1	7.83862e-09	1.39725	0.107	0.054	0.000185924
Cx3cl1	8.53585e-09	1.13833	0.132	0.073	0.000202462
Sf3b5	1.09889e-08	1.05649	0.176	0.111	0.000260645
Mvp	1.69628e-08	1.19469	0.134	0.076	0.000402341
Elf3	3.64776e-08	1.16329	0.143	0.086	0.000865211
Col4a1	7.11486e-08	1.05786	0.169	0.109	0.00168757
Tor3a	8.26134e-08	1.28187	0.107	0.057	0.00195951
9130230L23Rik	9.64317e-08	1.15409	0.105	0.055	0.00228726
Kbtbd11	1.47578e-07	1.0141	0.113	0.062	0.00350039
Cdk18	3.24511e-07	1.019	0.176	0.119	0.00769707
Mov10	3.88814e-07	1.02997	0.121	0.07	0.00922228
Prkd2	4.50997e-07	1.24377	0.106	0.059	0.0106972
Tprn	7.86901e-07	1.3005	0.107	0.062	0.0186645
Klf6	9.09402e-07	1.19538	0.203	0.147	0.0215701

## Sheet: DCT.bl6.to.bc
Table S2: Results from differential gene expression TCMR vs. Control
Differential expression was assessed using two-sided Wilcoxon rank-sum tests with Benjamini–Hochberg correction for multiple testing.
Distal convoluted tubules			*This Fold Change was calculated between [C57BL/6 to BALB/c ] and [C57BL/6 to C57BL/6]
Gene upr.	p_val	avg_log2FC*	pct.1	pct.2	p_val_adj				Gene downr.	p_val	avg_log2FC*	pct.1	pct.2	p_val_adj
H2-K1	3.32714e-99	4.96171	0.995	0.266	7.89164e-95				Pvalb	1.37661e-99	-8.93491	0.003	0.542
Spp1	1.48436e-95	3.08349	1	0.781	3.52075e-91				Klhl3	1.12165e-95	-3.0562	0.661	0.99
Iigp1	1.85198e-94	8.30889	0.96	0.026	4.39272e-90				Slc34a1	8.37251e-94	-3.92053	0.116	0.797
Chd9	4.33441e-93	3.60774	0.995	0.724	1.02808e-88				Slc12a3	3.70814e-91	-1.32379	0.987	1
B2m	5.83119e-88	4.53797	0.956	0.224	1.3831e-83				Kap	8.65096e-88	-2.78236	0.81	1
H2-D1	1.30341e-85	4.45689	0.947	0.172	3.09155e-81				Egf	9.25091e-88	-4.59964	0.405	0.953
Cd74	5.47348e-84	5.32212	0.93	0.083	1.29826e-79				Wnk1	3.39177e-83	-2.1459	0.902	1
Stat1	4.99792e-79	5.79866	0.894	0.115	1.18546e-74				Prkd1	1.82823e-79	-3.1309	0.644	0.969
Zfp981	4.68363e-78	3.14839	0.991	0.818	1.11091e-73				Gm26870	6.5009e-77	-4.91207	0.03	0.531
Ly6e	6.01495e-77	3.92486	0.922	0.203	1.42669e-72				Trpm6	5.09202e-74	-2.47073	0.694	0.979
Ly6a	3.55572e-70	2.80454	0.953	0.51	8.4338e-66				Esrrb	1.85049e-71	-2.9908	0.35	0.88
Gbp2	1.81412e-66	7.14218	0.792	0.016	4.30292e-62				Kl	2.79572e-70	-2.70824	0.384	0.922
Irgm1	1.06432e-65	6.74913	0.786	0.016	2.52446e-61				Miox	4.94113e-70	-3.59843	0.063	0.599
Gm42031	1.10646e-63	3.14292	0.912	0.5	2.62441e-59				Slc16a7	3.21701e-69	-2.10956	0.739	0.995
Irgm2	6.482e-63	6.32274	0.772	0.031	1.53747e-58				Tdrd3	5.3136e-65	-1.77526	0.811	0.99
Gm20663	1.37246e-62	7.26621	0.763	0.016	3.25534e-58				mt-Nd4	1.11154e-63	-1.96299	0.699	0.984
Tmsb4x	8.71768e-61	3.94207	0.876	0.271	2.06775e-56				Ppp1r1a	1.15656e-63	-2.54056	0.315	0.849
Nlrc5	9.08401e-60	5.07166	0.765	0.042	2.15464e-55				Lrp2	1.30153e-62	-3.83107	0.061	0.542
Syne2	1.20114e-57	1.69666	0.978	0.812	2.849e-53				Slc8a1	4.81599e-62	-3.97573	0.565	0.938
H2-Q7	1.24565e-57	8.45495	0.719	0.005	2.95455e-53				mt-Nd2	9.80251e-61	-1.89961	0.653	0.974
Gbp7	3.33873e-56	5.06285	0.745	0.062	7.91914e-52				Tsc22d1	1.66383e-59	-1.48255	0.926	0.995
Parp14	4.45766e-55	6.57247	0.711	0.026	1.05731e-50				Syne1	3.10547e-59	-1.95126	0.619	0.948
Lcn2	4.47916e-55	6.57819	0.711	0.026	1.06241e-50				Uroc1	2.88192e-58	-2.63233	0.248	0.776
Slc25a30	4.96819e-54	3.25749	0.847	0.359	1.1784e-49				Pdzrn3	3.15459e-58	-3.70196	0.104	0.594
Gm16685	3.56966e-51	1.70991	0.953	0.729	8.46688e-47				Gm42418	5.47798e-57	-1.14986	0.999	1
Tnfsf10	5.11033e-51	4.06107	0.743	0.13	1.21212e-46				Kalrn	1.34774e-54	-2.13717	0.413	0.885
Ccl5	1.57206e-48	9.57774	0.642	0	3.72878e-44				Aldob	1.43688e-54	-2.41991	0.301	0.839
Olfr56	2.23507e-48	7.64944	0.645	0.005	5.30136e-44				Gm2115	4.3442e-53	-6.06627	0.012	0.344
Ubd	2.80327e-46	9.03929	0.623	0	6.64908e-42				Larp1b	2.66412e-52	-1.70684	0.654	0.958
Irf1	1.01477e-44	6.71726	0.62	0.016	2.40694e-40				Sfrp1	3.09477e-52	-2.33467	0.404	0.859
Gm4951	5.23454e-44	7.10182	0.612	0.01	1.24158e-39				Cdk14	1.50327e-47	-1.57349	0.739	0.953
Naaladl2	1.82039e-43	2.23448	0.869	0.443	4.31779e-39				D630024D03Rik	2.73949e-47	-2.49835	0.215	0.698
H2-Q4	4.31953e-43	7.00328	0.599	0.005	1.02455e-38				Cables1	3.71585e-47	-2.69117	0.35	0.797
Psmb8	1.0872e-42	6.70993	0.599	0.01	2.57872e-38				Sgms2	1.09568e-46	-1.45696	0.823	1
H2-Aa	1.25534e-42	5.11323	0.624	0.036	2.97754e-38				Lpl	1.46015e-45	-2.51605	0.187	0.677
H2-Ab1	2.20456e-42	5.02371	0.625	0.042	5.22899e-38				mt-Cytb	1.53439e-45	-1.74233	0.516	0.917
Gm12216	2.50999e-42	2.88186	0.737	0.193	5.95345e-38				Grin3a	3.25968e-45	-6.38297	0.012	0.302
F830016B08Rik	2.96791e-42	9.86275	0.586	0	7.03958e-38				Lrrc52	4.16684e-45	-4.05766	0.032	0.37
Gbp8	5.64059e-42	8.86349	0.583	0	1.33789e-37				Itpr2	4.51375e-45	-1.41799	0.689	0.969
Rnf213	1.40479e-41	2.90015	0.752	0.292	3.33202e-37				Oxct1	3.27752e-44	-1.32853	0.788	0.964
Herc6	3.80316e-41	3.35648	0.668	0.099	9.02071e-37				Bckdhb	6.39712e-44	-1.66532	0.587	0.911
Clu	1.94041e-40	2.26086	0.85	0.432	4.60247e-36				Slc22a23	6.61528e-44	-1.87905	0.478	0.875
Samd5	6.23997e-40	5.29795	0.578	0.01	1.48006e-35				Sord	2.57633e-42	-2.49338	0.185	0.646
H2-Eb1	2.0178e-39	4.92851	0.595	0.031	4.78603e-35				Slc22a8	6.08352e-42	-5.14534	0.007	0.266
Camk2b	2.60266e-39	4.38925	0.673	0.172	6.17325e-35				Wfdc15b	1.23391e-40	-2.92127	0.148	0.562
Tap1	8.44911e-38	5.20798	0.57	0.031	2.00404e-33				mt-Atp6	2.05256e-40	-1.40184	0.793	0.984
H2-Q6	2.29461e-36	6.3032	0.538	0.01	5.4426e-32				Akr1c21	2.32896e-40	-2.67615	0.095	0.5
Gls	5.33803e-35	1.44532	0.974	0.839	1.26613e-30				Pde7b	1.49752e-39	-1.87062	0.532	0.865
Oasl2	2.04934e-34	5.64327	0.521	0.01	4.86084e-30				Rap1gap2	3.16601e-39	-1.43035	0.641	0.938
Nfkbiz	6.01574e-34	3.30949	0.616	0.125	1.42687e-29				Fads6	1.84506e-38	-1.96233	0.268	0.719
Kansl1l	1.06385e-33	1.68765	0.898	0.635	2.52335e-29				Cnnm2	3.23015e-38	-1.72927	0.615	0.906
Cd274	2.3461e-33	4.7406	0.546	0.047	5.56471e-29				Sned1	6.0005e-38	-3.84874	0.037	0.344
Gbp3	1.1815e-32	8.25178	0.488	0	2.80239e-28				Cmss1	1.29034e-37	-1.07704	0.88	1
Psmb9	1.31616e-32	5.58754	0.505	0.016	3.1218e-28				Tox3	1.4413e-37	-1.57749	0.726	0.938
Gm12185	2.17261e-32	5.25679	0.507	0.016	5.15321e-28				Epb41l3	2.92521e-37	-2.62691	0.266	0.661
Erbb4	5.68545e-32	1.50822	0.98	0.964	1.34853e-27				Ass1	4.98892e-37	-2.47231	0.113	0.516
Stat2	7.03422e-32	2.94676	0.62	0.151	1.66845e-27				Inpp5a	1.47341e-36	-2.01751	0.348	0.745
Id2	8.82916e-32	2.19763	0.714	0.276	2.09419e-27				Col4a4	3.95065e-36	-1.2856	0.761	0.958
Tfcp2l1	3.96026e-31	1.31818	0.927	0.823	9.39335e-27				Gabarapl1	1.14703e-35	-1.87315	0.365	0.771
Dcdc2a	5.94927e-31	4.02417	0.541	0.062	1.41111e-26				mt-Co3	5.227e-35	-1.31837	0.749	0.969
H2-T23	6.59787e-30	3.90837	0.517	0.047	1.56495e-25				Tex2	7.86074e-35	-2.07054	0.286	0.693
Nrxn3	1.97689e-29	3.20642	0.613	0.141	4.689e-25				mt-Nd3	8.00523e-35	-2.55822	0.132	0.521
Ifitm3	2.57456e-29	4.31332	0.507	0.052	6.10661e-25				mt-Nd5	2.77641e-34	-2.03329	0.263	0.677
Gm4841	2.86253e-29	8.67222	0.45	0	6.78963e-25				Fras1	3.0289e-34	-1.98923	0.307	0.719
Cxcl10	4.81761e-29	8.60446	0.447	0	1.14269e-24				Nat8f1	3.43527e-34	-3.40272	0.059	0.375
Tap2	5.37148e-29	3.5695	0.538	0.094	1.27406e-24				Tmem27	4.0895e-34	-2.12469	0.161	0.578
Sat1	7.6795e-29	2.10258	0.769	0.49	1.8215e-24				Adamtsl3	1.12791e-33	-4.96272	0.013	0.245
AW112010	1.6427e-28	6.82806	0.447	0.005	3.89633e-24				Tom1l2	2.54658e-33	-1.45336	0.628	0.891
Serping1	5.06186e-28	5.58309	0.45	0.01	1.20062e-23				Dbp	1.29396e-32	-3.04452	0.046	0.339
Nsun7	5.69937e-28	3.03265	0.545	0.089	1.35183e-23				Mthfd1	1.48132e-32	-1.42456	0.485	0.839
Stat3	1.21576e-27	1.27477	0.88	0.688	2.88367e-23				Mapk10	2.30076e-32	-2.59406	0.135	0.5
Tapbp	1.40468e-27	2.53693	0.609	0.172	3.33176e-23				mt-Nd1	4.27294e-32	-1.45513	0.475	0.839
Clec2d	1.82271e-27	2.59109	0.619	0.193	4.3233e-23				Rdh16f2	1.00517e-31	-6.62984	0.001	0.182
Trim12a	2.66462e-27	2.58796	0.599	0.161	6.32022e-23				Defb1	2.09642e-31	-1.71634	0.541	0.849
Vmp1	2.9658e-27	1.42658	0.858	0.604	7.03457e-23				Papss1	2.668e-31	-1.84279	0.417	0.766
Akt3	1.29056e-26	1.84492	0.711	0.281	3.06107e-22				Pah	4.12402e-31	-3.34951	0.028	0.281
Atp11a	1.4076e-26	1.66957	0.774	0.427	3.33869e-22				Top3b	5.90565e-31	-1.58278	0.443	0.797
Il7	1.59499e-26	3.028	0.579	0.177	3.78317e-22				Xylt1	3.36326e-30	-2.24842	0.142	0.505
Tmsb10	1.88243e-26	3.88372	0.471	0.042	4.46493e-22				Tcn2	8.73259e-30	-1.90628	0.232	0.615
Dysf	4.85345e-26	2.86498	0.544	0.104	1.15119e-21				mt-Co2	1.83192e-29	-1.18759	0.682	0.958
Bst2	9.50972e-26	4.55856	0.433	0.016	2.25561e-21				Ugt3a1	3.58455e-29	-5.01255	0.005	0.188
Cep85	9.68768e-26	2.77907	0.681	0.349	2.29782e-21				Lrrc66	1.68983e-28	-2.13488	0.128	0.474
Sh3rf1	1.07261e-25	1.15825	0.914	0.781	2.54413e-21				Emx1	3.34398e-28	-1.62134	0.356	0.729
Lyz2	1.16718e-25	5.50709	0.422	0.01	2.76843e-21				Slc22a6	7.13973e-28	-2.96825	0.037	0.286
Sh3bgrl3	3.7144e-25	2.46392	0.603	0.198	8.81019e-21				Cyp4a10	9.41341e-28	-4.10353	0.017	0.224
Apoe	4.77115e-25	2.92539	0.575	0.167	1.13167e-20				Abat	1.63492e-27	-2.05249	0.141	0.49
Plscr2	3.18061e-24	1.42661	0.792	0.51	7.54409e-20				Gm16010	1.71955e-27	-3.67042	0.026	0.25
Ivns1abp	3.95386e-24	1.24539	0.892	0.771	9.37817e-20				Whrn	2.82297e-27	-1.84125	0.263	0.625
A4galt	9.02726e-24	3.80902	0.458	0.062	2.14118e-19				mt-Co1	4.92803e-27	-1.03704	0.736	0.974
Mcc	9.47726e-24	2.1382	0.641	0.245	2.24791e-19				Kcnj1	9.48402e-27	-1.04954	0.687	0.938
Snx10	1.05468e-23	4.1562	0.425	0.031	2.50159e-19				Pacsin2	1.33446e-26	-1.36038	0.546	0.849
Ddx58	1.17014e-23	2.59369	0.529	0.125	2.77545e-19				Galm	3.22901e-26	-2.25426	0.161	0.495
Gm21154	1.37785e-23	3.77953	0.45	0.052	3.26813e-19				Cyp2a4	3.32739e-26	-4.4376	0.008	0.182
Tgfbr1	1.73233e-23	1.5369	0.802	0.542	4.10892e-19				Acsm2	4.97435e-26	-2.51433	0.095	0.396
Cd52	2.92021e-23	5.35575	0.397	0.016	6.92644e-19				Tbc1d14	1.56521e-25	-1.52555	0.508	0.802
Gvin1	3.64277e-23	6.37299	0.381	0.005	8.64029e-19				Fnip2	2.47709e-25	-1.58009	0.422	0.745
Itga6	6.43684e-23	1.22536	0.879	0.677	1.52675e-18				Calb1	3.4024e-25	-1.61165	0.278	0.651
Zbtb16	7.56921e-23	3.85435	0.433	0.047	1.79534e-18				Vdr	3.5382e-25	-1.20163	0.637	0.885
Fkbp5	8.93017e-23	1.92026	0.712	0.438	2.11815e-18				Cabcoco1	6.44822e-25	-1.31652	0.566	0.865
Wfdc2	1.61175e-22	1.64802	0.734	0.385	3.82291e-18				Tmem116	7.52614e-25	-1.08377	0.681	0.885
Piezo1	1.68646e-22	1.99146	0.6	0.224	4.00011e-18				Gm32569	1.58529e-24	-1.39751	0.454	0.781
Gm26624	3.96485e-22	2.35762	0.573	0.214	9.40423e-18				Vegfd	1.6615e-24	-3.07578	0.047	0.286
Dock10	4.42389e-22	2.28316	0.561	0.172	1.0493e-17				Gm47708	1.87948e-24	-3.86156	0.011	0.182
Parp9	7.27162e-22	2.52296	0.522	0.146	1.72476e-17				Gm49272	2.25864e-24	-2.87633	0.053	0.297
Tgtp2	8.74965e-22	7.53309	0.356	0	2.07533e-17				Dnase1	5.97668e-24	-4.89798	0.011	0.177
Arl15	1.232e-21	1.32306	0.799	0.427	2.92219e-17				Dnah11	6.62773e-24	-2.58162	0.062	0.318
Pea15a	3.03743e-21	2.7956	0.488	0.115	7.20449e-17				mt-Nd4l	7.82159e-24	-1.8262	0.179	0.516
Samhd1	3.24705e-21	3.15599	0.453	0.078	7.70167e-17				Idh2	8.45347e-24	-1.37671	0.437	0.76
Pla2g16	1.45039e-20	3.12982	0.43	0.068	3.44019e-16				Stk32b	9.29191e-24	-1.43876	0.468	0.781
Rtn4	5.82591e-20	1.86803	0.66	0.359	1.38185e-15				Mep1a	1.16472e-23	-2.04549	0.082	0.365
Itgav	4.73063e-19	1.66696	0.846	0.708	1.12206e-14				Gm13052	3.75105e-23	-2.02699	0.136	0.443
Gm32857	9.57834e-19	4.72891	0.35	0.026	2.27189e-14				Tsc22d2	5.32639e-23	-1.01827	0.814	0.948
Rtp4	1.16984e-18	7.19877	0.313	0	2.77475e-14				Itpkb	1.11537e-22	-1.66419	0.311	0.635
Clint1	1.21107e-18	1.06633	0.856	0.745	2.87254e-14				Hadh	2.16169e-22	-1.90522	0.169	0.484
Ap2b1	1.3685e-18	1.16109	0.805	0.526	3.24593e-14				Fbp1	6.653e-22	-2.44499	0.062	0.307
Rps29	1.75441e-18	1.45813	0.737	0.427	4.16128e-14				Fut9	9.6242e-22	-2.01767	0.128	0.427
Myof	2.3646e-18	1.95996	0.594	0.276	5.60858e-14				Tbc1d4	1.8322e-21	-1.31369	0.433	0.734
Spns2	2.6974e-18	6.37835	0.321	0.01	6.39797e-14				Slc22a4	6.85664e-21	-2.31925	0.137	0.417
S100a11	3.50698e-18	1.74367	0.606	0.276	8.3182e-14				Plekha6	8.21186e-21	-1.31828	0.505	0.771
Serinc3	4.09292e-18	1.24801	0.741	0.464	9.708e-14				Tef	8.98382e-21	-1.6048	0.253	0.578
H2-T22	5.53206e-18	2.83543	0.423	0.094	1.31215e-13				Hmgcll1	1.03341e-20	-1.26108	0.542	0.818
9530026P05Rik	6.35623e-18	1.23432	0.852	0.661	1.50763e-13				Keg1	1.08391e-20	-2.00301	0.148	0.443
Fbxw17	9.30826e-18	5.22719	0.315	0.01	2.20783e-13				Ak4	1.25867e-20	-3.85329	0.015	0.172
Paxbp1	1.04368e-17	1.17297	0.756	0.547	2.47549e-13				Piga	1.79567e-20	-2.24563	0.113	0.385
Cxcl9	1.42516e-17	7.61863	0.297	0	3.38033e-13				Prox1	6.71697e-20	-1.738	0.236	0.552
Ltc4s	1.63461e-17	2.46024	0.45	0.115	3.87713e-13				Spink1	6.98146e-20	-1.61719	0.183	0.505
Psmb10	1.88373e-17	4.0166	0.33	0.021	4.46803e-13				Scara5	1.85496e-19	-2.0156	0.144	0.422
Sema3c	1.90349e-17	2.99418	0.422	0.099	4.5149e-13				Srl	2.15224e-19	-2.76153	0.074	0.302
Ctps	2.27562e-17	4.69453	0.325	0.021	5.39754e-13				Ces1f	3.31434e-19	-4.03862	0.007	0.135
Vcam1	2.52416e-17	5.53559	0.309	0.01	5.98706e-13				Colgalt2	6.02012e-19	-1.99968	0.145	0.422
Rasgrp1	3.43855e-17	6.33457	0.298	0.005	8.1559e-13				Ddo	7.81439e-19	-1.10026	0.633	0.854
Tinag	3.69036e-17	2.17665	0.504	0.182	8.75317e-13				Gatm	9.24185e-19	-1.9123	0.092	0.349
Nmi	4.54947e-17	2.40996	0.47	0.161	1.07909e-12				Ttc36	9.40553e-19	-1.45499	0.222	0.547
Mast4	4.86149e-17	1.22059	0.755	0.474	1.1531e-12				Slc13a3	1.1276e-18	-3.45964	0.02	0.177
Ifi27	5.84367e-17	2.42397	0.442	0.115	1.38606e-12				Sv2a	1.65626e-18	-1.67856	0.212	0.516
Fmnl2	5.93253e-17	1.53767	0.65	0.359	1.40714e-12				Acat1	1.70802e-18	-1.04113	0.471	0.781
Pycard	8.35966e-17	1.97217	0.536	0.224	1.98283e-12				Cyp4a14	1.91426e-18	-4.54785	0.007	0.13
Gm4070	8.93325e-17	6.97289	0.285	0	2.11888e-12				Lhx1	2.17402e-18	-1.33264	0.433	0.729
Idnk	9.87657e-17	2.29336	0.454	0.135	2.34262e-12				Adamtsl2	2.2092e-18	-4.17287	0.005	0.125
Dtx3l	1.0794e-16	5.17802	0.299	0.01	2.56022e-12				Rtl4	2.37591e-18	-2.55333	0.082	0.307
Ptpn13	1.21405e-16	1.3671	0.788	0.573	2.87961e-12				Gm15848	2.58477e-18	-2.84887	0.051	0.25
Gm26804	1.68895e-16	1.66622	0.682	0.453	4.00601e-12				Col4a3	2.63237e-18	-1.02406	0.654	0.854
Birc3	1.79834e-16	2.43583	0.471	0.151	4.26548e-12				D3Ertd751e	3.64008e-18	-2.01892	0.14	0.401
Sh2d4b	2.85743e-16	4.74291	0.302	0.016	6.77753e-12				Slc43a2	3.66726e-18	-1.22391	0.48	0.75
Xaf1	5.33731e-16	4.26956	0.305	0.021	1.26596e-11				Lhx1os	5.77475e-18	-1.60319	0.274	0.562
Tpt1	5.3763e-16	1.11595	0.854	0.682	1.2752e-11				Gm13262	7.38765e-18	-1.954	0.08	0.312
Psme1	6.06101e-16	2.41757	0.425	0.115	1.43761e-11				Igfbp4	1.30653e-17	-2.39136	0.084	0.312
H3f3b	1.31376e-15	1.58037	0.587	0.281	3.11611e-11				Nhsl2	1.97709e-17	-1.95805	0.15	0.411
Pigr	1.31429e-15	1.76684	0.525	0.214	3.11736e-11				Cat	2.27256e-17	-1.85172	0.194	0.464
Parp12	1.41043e-15	1.72603	0.541	0.24	3.34539e-11				mt-Atp8	2.29321e-17	-2.20845	0.092	0.318
Socs1	1.454e-15	7.10124	0.266	0	3.44875e-11				Bckdha	2.30311e-17	-1.31354	0.338	0.625
Ifitm10	1.65155e-15	5.14737	0.276	0.005	3.91731e-11				Sybu	5.34584e-17	-2.00219	0.107	0.349
Zfp36l1	1.76853e-15	1.69876	0.591	0.318	4.19477e-11				Ppargc1b	8.01371e-17	-1.34504	0.34	0.625
Tlcd2	1.83655e-15	1.78187	0.524	0.219	4.35612e-11				Itga1	1.03953e-16	-1.03547	0.472	0.75
Ehf	4.37715e-15	4.31353	0.285	0.016	1.03822e-10				Spp2	1.1252e-16	-3.39511	0.011	0.135
Plac8	4.48988e-15	5.44914	0.268	0.005	1.06495e-10				Prkce	1.52175e-16	-1.00375	0.679	0.828
Cd47	5.2089e-15	1.44958	0.599	0.302	1.2355e-10				Phf2	1.53368e-16	-1.84012	0.156	0.411
Trim30a	6.25902e-15	4.01621	0.297	0.026	1.48458e-10				Atp2b4	1.55907e-16	-1.28717	0.28	0.578
Actb	6.56756e-15	1.2777	0.765	0.578	1.55776e-10				Khk	1.62656e-16	-2.21247	0.047	0.234
Adgrg3	8.43066e-15	3.38807	0.325	0.047	1.99967e-10				Kcnn2	1.64084e-16	-2.3458	0.077	0.286
2810474O19Rik	1.69235e-14	1.33337	0.699	0.469	4.01408e-10				Sfxn5	1.97982e-16	-1.19367	0.405	0.682
Syt2	1.78693e-14	4.53249	0.274	0.016	4.23842e-10				Isyna1	3.15033e-16	-1.97411	0.061	0.26
Nuak2	1.96911e-14	2.2722	0.476	0.198	4.67054e-10				Arnt2	4.60914e-16	-1.19573	0.732	0.88
Gbp5	2.19019e-14	7.64782	0.248	0	5.19491e-10				Dnajc6	5.45104e-16	-1.73285	0.232	0.49
Kcnq1ot1	3.03126e-14	1.70836	0.637	0.411	7.18984e-10				Syt9	7.67384e-16	-1.5866	0.158	0.417
Samd9l	3.03916e-14	1.43639	0.596	0.333	7.20858e-10				Fam107a	9.6633e-16	-1.86231	0.139	0.38
Rps20	3.53373e-14	1.24055	0.685	0.438	8.38165e-10				Aadat	1.16583e-15	-2.92975	0.036	0.198
Pak1	5.67941e-14	2.8944	0.347	0.073	1.3471e-09				Afm	1.26157e-15	-2.14519	0.123	0.354
Ly6c1	8.39139e-14	2.99025	0.313	0.047	1.99035e-09				Pdzk1	1.40018e-15	-2.02215	0.08	0.292
Immp2l	9.43834e-14	1.27727	0.657	0.385	2.23868e-09				Rab27a	1.41061e-15	-1.23587	0.375	0.641
Ddx60	1.61688e-13	3.39754	0.253	0.01	3.83507e-09				Gas1	1.67126e-15	-2.9074	0.034	0.193
Parp8	1.68061e-13	1.24481	0.799	0.578	3.98624e-09				Sall3	2.3055e-15	-1.11601	0.4	0.667
Zbp1	1.75035e-13	6.69083	0.234	0	4.15165e-09				Slc5a2	2.54734e-15	-2.78535	0.024	0.167
Col5a2	1.8277e-13	1.81919	0.648	0.458	4.33511e-09				Unc5b	3.84545e-15	-2.42497	0.037	0.198
Gab2	2.02197e-13	1.11445	0.707	0.438	4.7959e-09				Ttr	4.09695e-15	-3.65237	0.011	0.125
Apol6	3.06118e-13	6.81377	0.23	0	7.26082e-09				Acaa1b	4.96712e-15	-2.99319	0.025	0.167
Adamts6	3.30718e-13	1.5123	0.54	0.255	7.8443e-09				Map2k6	5.09337e-15	-1.36354	0.227	0.49
Cerkl	3.34848e-13	3.45503	0.29	0.042	7.94225e-09				Cox6c	5.12267e-15	-1.02625	0.511	0.755
Msn	3.63318e-13	2.1459	0.418	0.146	8.61753e-09				Mgst3	5.38521e-15	-1.42599	0.21	0.479
Jun	3.76793e-13	2.88625	0.297	0.042	8.93716e-09				Tob1	5.95402e-15	-1.19301	0.301	0.578
AC166344.1	3.9061e-13	2.35394	0.356	0.089	9.26488e-09				Ush1c	6.94785e-15	-1.16757	0.361	0.625
Gm8439	5.03594e-13	5.37327	0.235	0.005	1.19448e-08				Pgam2	9.1457e-15	-1.76235	0.124	0.354
4930486I03Rik	5.41166e-13	1.58548	0.565	0.312	1.28359e-08				Ces1d	1.15129e-14	-3.06802	0.015	0.135
Sipa1l1	5.57351e-13	1.51205	0.555	0.312	1.32198e-08				Ugt3a2	1.27209e-14	-2.69194	0.028	0.172
Plcb1	5.64032e-13	1.75249	0.476	0.203	1.33783e-08				Adhfe1	1.61864e-14	-1.36503	0.265	0.526
Gm44148	6.22664e-13	2.62419	0.311	0.052	1.4769e-08				Rap1gap	1.87778e-14	-1.16129	0.331	0.599
Kif23	6.5971e-13	2.43718	0.387	0.125	1.56477e-08				Arl6ip1	2.07066e-14	-1.35649	0.317	0.568
S100a6	8.97138e-13	2.56428	0.332	0.073	2.12792e-08				Cyp2j7	2.73852e-14	-1.7702	0.119	0.339
Ubb	9.33487e-13	1.11389	0.693	0.448	2.21414e-08				Mpp7	4.62236e-14	-1.19525	0.377	0.625
S100a10	9.86789e-13	1.96222	0.443	0.167	2.34057e-08				Pck1	4.96149e-14	-2.00627	0.084	0.281
Slc25a21	1.52484e-12	1.43614	0.528	0.255	3.61677e-08				Pank1	5.36355e-14	-1.12704	0.315	0.589
Ctss	1.72429e-12	5.06805	0.234	0.01	4.08983e-08				Pcbd1	5.77538e-14	-1.81404	0.119	0.333
Vav3	2.12648e-12	1.07674	0.67	0.417	5.0438e-08				Slc22a1	6.30844e-14	-2.52968	0.025	0.161
Ly75	2.52557e-12	2.04368	0.384	0.125	5.99039e-08				Lipa	7.94702e-14	-1.79298	0.067	0.255
Myo1b	2.56486e-12	2.4612	0.348	0.094	6.0836e-08				Maob	1.06867e-13	-2.58396	0.049	0.208
Ifi44	2.76035e-12	4.92721	0.231	0.01	6.54729e-08				Rhpn2	1.78839e-13	-1.67584	0.128	0.344
Tnfrsf21	3.39048e-12	1.99801	0.442	0.188	8.04188e-08				Fam13c	1.87763e-13	-1.78426	0.128	0.344
Adamts1	3.39657e-12	4.88938	0.244	0.021	8.05634e-08				Ank2	2.06582e-13	-1.15347	0.463	0.688
Cp	3.94899e-12	4.15541	0.274	0.042	9.36662e-08				Sgsm1	2.09715e-13	-1.54607	0.173	0.411
Ifih1	4.20129e-12	3.81341	0.252	0.026	9.96505e-08				9430037G07Rik	2.24566e-13	-2.35387	0.046	0.203
Pax8	4.84047e-12	1.57048	0.538	0.286	1.14811e-07				Anks1	2.41597e-13	-1.00666	0.476	0.714
D430041D05Rik	5.49e-12	4.20522	0.243	0.021	1.30217e-07				Ppara	2.61663e-13	-1.32391	0.195	0.443
Tspan14	6.56826e-12	1.48105	0.483	0.234	1.55793e-07				Abhd6	3.10676e-13	-1.34993	0.331	0.589
Wsb1	6.86623e-12	1.1052	0.687	0.495	1.6286e-07				Cntn3	3.25895e-13	-1.85905	0.106	0.307
Zfhx3	7.93094e-12	1.16453	0.636	0.396	1.88114e-07				Nox4	4.03112e-13	-1.75395	0.108	0.318
Gm10073	8.83895e-12	1.29823	0.624	0.406	2.09651e-07				Fam234a	4.43305e-13	-1.28584	0.311	0.557
Tspo	9.16279e-12	1.51417	0.55	0.297	2.17332e-07				Pecr	4.54901e-13	-2.16802	0.044	0.198
Klf7	1.19401e-11	1.56836	0.524	0.281	2.83208e-07				Slc16a10	4.96111e-13	-1.08453	0.346	0.604
Acadl	1.22004e-11	1.13217	0.687	0.453	2.8938e-07				5830473C10Rik	5.0559e-13	-3.48433	0.013	0.12
Col18a1	1.39848e-11	1.5719	0.517	0.281	3.31706e-07				Fam81a	5.43022e-13	-1.44506	0.212	0.458
Erap1	1.76119e-11	1.9453	0.381	0.13	4.17736e-07				Atp6v1c2	5.45005e-13	-3.35452	0.013	0.12
Ndrg1	1.76602e-11	1.27598	0.683	0.49	4.18881e-07				1700028J19Rik	8.45285e-13	-1.82941	0.088	0.276
4930599N23Rik	2.50521e-11	2.07677	0.358	0.115	5.94211e-07				Gm5860	8.53635e-13	-2.05421	0.053	0.214
Upp1	2.65933e-11	2.92487	0.284	0.057	6.30766e-07				0610005C13Rik	9.25237e-13	-2.07095	0.062	0.229
Smad1	2.87124e-11	1.54869	0.435	0.177	6.81029e-07				Mreg	9.60939e-13	-2.55948	0.032	0.167
Prkab1	2.96777e-11	1.54487	0.443	0.182	7.03924e-07				Aass	1.06308e-12	-1.83717	0.071	0.25
Patl2	4.68386e-11	3.06264	0.247	0.031	1.11097e-06				Mccc1	1.29249e-12	-1.13485	0.272	0.531
Vim	4.82799e-11	6.65676	0.193	0	1.14515e-06				Macrod1	1.40663e-12	-1.45584	0.224	0.464
Gm19684	5.25712e-11	5.28672	0.201	0.005	1.24694e-06				Umod	1.68786e-12	-1.14211	0.695	0.859
Fyb2	5.67347e-11	3.76836	0.234	0.026	1.34569e-06				Pamr1	1.94617e-12	-1.54484	0.129	0.339
Parp10	6.00953e-11	2.08725	0.322	0.083	1.4254e-06				Slc30a2	2.16551e-12	-3.37742	0.018	0.13
Nrg1	6.19048e-11	1.19364	0.708	0.531	1.46832e-06				Chrna4	2.38683e-12	-2.21243	0.055	0.214
Trim5	6.91388e-11	3.46572	0.234	0.026	1.6399e-06				Klhl32	3.10995e-12	-1.4301	0.215	0.443
Gsr	6.96448e-11	1.67266	0.417	0.161	1.65191e-06				Cytip	3.47808e-12	-1.0121	0.401	0.646
Rps27a	7.32663e-11	1.19077	0.599	0.359	1.7378e-06				Slc2a12	3.58847e-12	-1.91299	0.07	0.24
Lgals3	8.67045e-11	1.72326	0.416	0.167	2.05654e-06				Papss2	5.36856e-12	-2.00199	0.057	0.214
Anxa3	8.7819e-11	4.24148	0.199	0.005	2.08298e-06				Bcat2	6.57388e-12	-1.37044	0.259	0.479
C1qa	9.68546e-11	4.68213	0.198	0.005	2.29729e-06				Ggnbp1	7.26038e-12	-1.69326	0.12	0.318
St3gal4	1.04058e-10	1.98194	0.359	0.12	2.46815e-06				Hao2	8.46248e-12	-1.98011	0.071	0.24
Pmepa1	1.04117e-10	1.37781	0.547	0.307	2.46956e-06				Slc22a12	8.81141e-12	-2.34782	0.042	0.182
Cebpd	1.12783e-10	3.73154	0.23	0.026	2.67509e-06				Acot11	9.28579e-12	-1.2665	0.29	0.516
Unc93b1	1.19825e-10	1.97996	0.346	0.104	2.84213e-06				Pptc7	1.02371e-11	-1.00804	0.425	0.641
Serpina3g	1.37822e-10	6.64634	0.185	0	3.269e-06				S100g	1.04843e-11	-1.28449	0.257	0.5
Clic1	1.40246e-10	1.31797	0.507	0.266	3.3265e-06				Cubn	1.08099e-11	-2.38964	0.041	0.177
Ptp4a2	1.41287e-10	1.28891	0.586	0.38	3.35118e-06				Acy3	1.20619e-11	-1.30069	0.22	0.458
Arhgap8	1.43416e-10	3.4727	0.204	0.01	3.4017e-06				Dusp15	1.31381e-11	-2.94628	0.015	0.115
Map3k1	1.4745e-10	1.19847	0.657	0.505	3.49736e-06				Dmtn	1.54321e-11	-1.10112	0.367	0.589
Csf2ra	1.68933e-10	3.29547	0.222	0.021	4.00691e-06				Gcnt1	1.96146e-11	-1.6461	0.083	0.26
Junb	1.93492e-10	4.21056	0.208	0.016	4.58943e-06				Fmo1	2.19512e-11	-2.43734	0.022	0.135
Hprt	2.09129e-10	2.13674	0.315	0.089	4.96033e-06				Gm31045	2.7728e-11	-2.2001	0.032	0.156
9130230L23Rik	2.188e-10	1.97128	0.332	0.099	5.18973e-06				Gm33543	3.02946e-11	-2.68902	0.03	0.151
Gm47283	2.25675e-10	2.58005	0.251	0.042	5.35279e-06				Acacb	3.30259e-11	-1.01273	0.413	0.651
Gmds	2.33098e-10	1.1513	0.646	0.406	5.52886e-06				Osbp2	3.82854e-11	-1.69307	0.113	0.297
Esr1	2.51683e-10	1.79937	0.383	0.146	5.96968e-06				Gm42697	3.89185e-11	-1.74607	0.038	0.172
Rpl6	2.63132e-10	1.18296	0.567	0.333	6.24122e-06				Zfp385b	4.9674e-11	-1.38613	0.145	0.349
Fau	2.69946e-10	1.12508	0.546	0.302	6.40285e-06				Sept6	6.39409e-11	-1.23762	0.125	0.323
Krt8	2.94396e-10	2.47427	0.284	0.068	6.98278e-06				Mettl7b	6.84318e-11	-2.28606	0.024	0.135
Tmem176b	3.10506e-10	1.15099	0.584	0.339	7.3649e-06				Ugt2b38	6.88435e-11	-2.44901	0.02	0.125
Tapbpl	3.20114e-10	3.46364	0.222	0.026	7.59279e-06				Slc16a5	6.95893e-11	-1.37738	0.19	0.401
Txnip	3.3247e-10	1.04088	0.708	0.625	7.88585e-06				Vps13c	6.9775e-11	-1.03123	0.355	0.578
Acsl5	3.47403e-10	1.50411	0.439	0.203	8.24006e-06				Fign	7.80486e-11	-1.50962	0.185	0.391
BC005561	3.82585e-10	1.05888	0.604	0.38	9.07454e-06				Acaa2	9.17356e-11	-1.38556	0.145	0.344
Mllt3	4.2008e-10	2.81893	0.265	0.057	9.96387e-06				Fam151a	9.43789e-11	-3.28014	0.013	0.104
Ifit2	4.38453e-10	3.98357	0.203	0.016	1.03997e-05				Pbld1	9.90127e-11	-1.55105	0.16	0.359
Sp140	4.69753e-10	3.5981	0.197	0.01	1.11421e-05				Pcx	1.0844e-10	-1.93758	0.073	0.229
Acot9	5.34365e-10	1.63129	0.442	0.219	1.26746e-05				Perm1	1.09414e-10	-3.17389	0.013	0.104
C230088H06Rik	5.56755e-10	2.85464	0.261	0.057	1.32057e-05				Sdhc	1.09602e-10	-1.07241	0.33	0.562
Tacstd2	6.13502e-10	2.08948	0.314	0.094	1.45516e-05				Scml4	1.11946e-10	-1.63495	0.115	0.297
Rplp0	7.75158e-10	1.14752	0.604	0.401	1.8386e-05				Slc27a2	1.13852e-10	-1.08055	0.33	0.557
Irf7	8.04814e-10	4.84454	0.181	0.005	1.90894e-05				Nup93	1.47097e-10	-1.35828	0.334	0.531
Rpl19	8.63428e-10	1.04274	0.675	0.474	2.04796e-05				Napsa	1.48788e-10	-1.05811	0.582	0.781
AU020206	9.14095e-10	6.18556	0.17	0	2.16814e-05				Tmem94	1.7777e-10	-1.17199	0.235	0.453
Xdh	9.23467e-10	3.80825	0.206	0.021	2.19037e-05				Pik3c2g	1.78384e-10	-1.5453	0.142	0.333
Ifi35	9.32196e-10	2.63747	0.26	0.057	2.21108e-05				Rida	1.96984e-10	-1.15231	0.311	0.547
Cxcl17	1.2056e-09	3.51684	0.204	0.021	2.85955e-05				C130050O18Rik	1.98523e-10	-2.18792	0.028	0.141
Gm48678	1.29041e-09	1.49732	0.47	0.25	3.06072e-05				Depdc1b	2.11242e-10	-1.43362	0.125	0.312
Ano9	1.35976e-09	1.91373	0.306	0.089	3.22521e-05				Pdk2	2.165e-10	-1.16908	0.22	0.432
Hdac7	1.39022e-09	1.6229	0.396	0.172	3.29745e-05				Gm44386	2.37741e-10	-1.60251	0.099	0.271
Cntn5	1.4716e-09	2.17181	0.31	0.099	3.49049e-05				Cyp2j5	2.64096e-10	-1.34591	0.119	0.307
Rpl32	2.0832e-09	1.04262	0.644	0.427	4.94115e-05				AI838599	2.69174e-10	-2.01711	0.088	0.25
Parp3	2.68758e-09	2.00006	0.274	0.068	6.37466e-05				Cnnm1	2.92547e-10	-1.42974	0.148	0.339
Serpinb9	2.70325e-09	3.81616	0.19	0.016	6.41184e-05				Uqcr11	3.25527e-10	-1.15181	0.281	0.495
Rpl39	2.75506e-09	1.76561	0.364	0.151	6.53472e-05				Igfbp5	3.84128e-10	-2.0209	0.041	0.167
Mxra7	2.77891e-09	3.5066	0.198	0.021	6.5913e-05				Gsta2	3.95852e-10	-1.95146	0.036	0.156
4932411K12Rik	2.78645e-09	2.11036	0.322	0.115	6.60917e-05				Slc5a12	4.11662e-10	-2.93341	0.025	0.13
Pawr	3.1899e-09	1.09653	0.54	0.318	7.56612e-05				Amn	5.21315e-10	-2.49012	0.018	0.115
Nipal2	3.39061e-09	1.45851	0.402	0.177	8.0422e-05				Slc7a12	5.30251e-10	-2.53084	0.018	0.115
Trim12c	3.57673e-09	1.89842	0.314	0.104	8.48365e-05				Pdgfc	5.45393e-10	-1.03879	0.302	0.516
Ctso	3.68041e-09	1.58922	0.34	0.12	8.72957e-05				Abhd14b	5.58845e-10	-1.42001	0.115	0.292
Il18bp	4.09219e-09	2.92291	0.212	0.031	9.70627e-05				2610035D17Rik	5.6191e-10	-1.27682	0.325	0.531
Emp2	4.23052e-09	4.23324	0.177	0.01	0.000100344				Zfp629	5.80018e-10	-1.56136	0.084	0.245
C1qb	4.70413e-09	5.45922	0.166	0.005	0.000111577				Scd1	5.92316e-10	-2.53482	0.028	0.135
Batf2	4.92155e-09	5.14329	0.174	0.01	0.000116734				Nr1d1	6.24797e-10	-2.42815	0.044	0.167
Tyrobp	4.93456e-09	6.25726	0.157	0	0.000117043				Gm4593	7.08812e-10	-1.82276	0.083	0.24
Zdhhc6	4.98851e-09	1.16687	0.46	0.219	0.000118322				Akr7a5	7.74517e-10	-1.40353	0.092	0.26
Arntl	5.04097e-09	3.16344	0.208	0.031	0.000119567				Ldlr	7.75751e-10	-1.08404	0.17	0.375
Gm11808	5.26797e-09	1.09709	0.625	0.432	0.000124951				Slc17a3	8.58628e-10	-2.33419	0.028	0.135
Rps4x	5.58978e-09	1.28591	0.501	0.281	0.000132584				Cntfr	1.01466e-09	-2.03125	0.061	0.198
Sp100	5.6745e-09	5.12887	0.165	0.005	0.000134593				Acot13	1.03893e-09	-1.32802	0.197	0.391
Rpl27a	5.76212e-09	1.14284	0.566	0.365	0.000136672				Dcxr	1.2343e-09	-2.13052	0.044	0.167
4930550C14Rik	5.86468e-09	1.77709	0.294	0.089	0.000139104				Hgd	1.25484e-09	-2.26115	0.036	0.151
Map4	6.26179e-09	1.03406	0.625	0.443	0.000148524				Tcea3	1.31622e-09	-2.80506	0.02	0.115
Spink10	6.71574e-09	3.25698	0.185	0.016	0.000159291				Acsm1	1.40119e-09	-2.65286	0.016	0.104
Ctse	7.32886e-09	3.03635	0.185	0.016	0.000173833				Ech1	1.41259e-09	-1.26479	0.173	0.375
Cstb	7.63262e-09	1.82861	0.323	0.12	0.000181038				Plxna4	1.42787e-09	-3.0422	0.022	0.12
Icam1	8.06911e-09	4.59872	0.172	0.01	0.000191391				Matn4	1.43437e-09	-2.56439	0.016	0.104
Map3k14	8.49013e-09	1.34866	0.445	0.229	0.000201377				Mapre2	1.58891e-09	-1.29389	0.27	0.458
Tubb5	8.88397e-09	2.92285	0.206	0.031	0.000210719				Ccdc62	1.92986e-09	-1.16202	0.231	0.432
Cst3	9.49393e-09	1.20582	0.505	0.297	0.000225187				N4bp2	1.97654e-09	-1.08126	0.389	0.568
Pkp2	1.1784e-08	1.26275	0.406	0.182	0.000279504				Acadm	2.10455e-09	-1.17447	0.273	0.484
Rpl10a	1.23466e-08	1.17202	0.475	0.26	0.000292849				Mfsd4b5	2.19946e-09	-2.071	0.047	0.172
Gm44511	1.23594e-08	1.11188	0.505	0.297	0.000293153				Glyat	2.482e-09	-1.51381	0.084	0.24
Plscr1	1.32193e-08	1.70497	0.365	0.161	0.000313549				Batf3	2.59009e-09	-2.65385	0.033	0.141
Gadd45a	1.54985e-08	2.73343	0.203	0.031	0.000367608				Nadk2	2.73143e-09	-1.01769	0.297	0.5
Laptm4a	1.84778e-08	1.09097	0.509	0.312	0.000438275				Capn6	2.87851e-09	-1.87611	0.05	0.177
Npas2	1.88778e-08	2.90171	0.215	0.042	0.000447763				Atp2b2	3.00289e-09	-1.45551	0.123	0.292
1700024B05Rik	1.94165e-08	2.85122	0.202	0.031	0.000460539				Acad11	3.77478e-09	-1.38229	0.174	0.354
Anxa2	1.98159e-08	3.89749	0.157	0.005	0.000470013				4930556J24Rik	3.99942e-09	-1.34384	0.245	0.438
Arpc1b	2.03536e-08	1.64325	0.265	0.073	0.000482766				Mgam	5.27904e-09	-1.65185	0.125	0.286
Itgb6	2.04547e-08	1.35736	0.65	0.49	0.000485165				Ppat	6.21594e-09	-1.12228	0.292	0.49
Rps12-ps3	2.1167e-08	1.71694	0.299	0.104	0.00050206				Car2	6.26766e-09	-1.89123	0.077	0.219
Trim34a	2.16267e-08	1.47763	0.34	0.135	0.000512964				Abcg2	6.63593e-09	-1.71402	0.058	0.188
Ssfa2	2.2983e-08	1.39228	0.358	0.151	0.000545134				Ckb	6.75325e-09	-1.54914	0.145	0.318
C3	2.44399e-08	3.19347	0.182	0.021	0.00057969				6430573F11Rik	7.24418e-09	-2.21862	0.057	0.182
Gm11536	2.4604e-08	1.80243	0.326	0.13	0.000583581				Fam117a	7.43508e-09	-1.54794	0.104	0.26
Gm26835	3.06166e-08	2.07235	0.252	0.068	0.000726195				Narf	7.81532e-09	-1.23716	0.177	0.365
Slc22a15	3.15035e-08	3.23977	0.179	0.021	0.000747232				Cmtm8	8.3467e-09	-1.23674	0.199	0.391
Ephb2	3.3428e-08	2.54967	0.227	0.052	0.000792878				Slc2a2	1.04392e-08	-2.51796	0.018	0.104
Itpr3	3.66808e-08	3.50046	0.177	0.021	0.000870032				Pgrmc2	1.1174e-08	-1.60105	0.109	0.266
Cdh6	3.68814e-08	3.80237	0.177	0.021	0.00087479				Bdh2	1.20703e-08	-2.43462	0.018	0.104
Svil	4.02794e-08	1.4045	0.389	0.188	0.000955387				Fmo2	1.31135e-08	-2.19799	0.025	0.12
Clic4	4.02987e-08	1.1488	0.489	0.271	0.000955844				Alpl	1.31135e-08	-2.0778	0.025	0.12
Hap1	4.34291e-08	3.69148	0.168	0.016	0.0010301				Irs1	1.58635e-08	-1.07297	0.307	0.5
Rnf19a	4.42326e-08	1.00327	0.566	0.385	0.00104915				Fam98a	1.6666e-08	-1.2189	0.178	0.354
Cebpb	4.42581e-08	4.19627	0.158	0.01	0.00104976				Gpam	1.7489e-08	-1.47016	0.084	0.229
Trpm3	4.48532e-08	1.39761	0.326	0.125	0.00106387				Cela1	2.07832e-08	-1.87913	0.033	0.135
Il34	4.78276e-08	3.23952	0.185	0.026	0.00113442				Crocc	2.14801e-08	-1.46557	0.084	0.229
Rps9	4.83992e-08	1.10525	0.577	0.427	0.00114798				Slco1a6	2.28643e-08	-2.33105	0.026	0.12
Cttn	5.16585e-08	1.26342	0.414	0.203	0.00122529				Bmp6	2.50633e-08	-2.04289	0.045	0.156
Gm43713	5.51832e-08	1.21303	0.474	0.276	0.00130889				Pbld2	2.56378e-08	-2.03951	0.047	0.161
Gm6034	5.57525e-08	3.4582	0.166	0.016	0.00132239				Aldh8a1	2.65358e-08	-2.58058	0.02	0.104
Ifit3	6.10832e-08	4.6459	0.146	0.005	0.00144883				Gm16035	3.01772e-08	-2.11556	0.029	0.125
Rps11	7.58737e-08	1.41409	0.396	0.203	0.00179965				Tmem8	3.61053e-08	-1.61697	0.069	0.198
Osmr	7.81934e-08	4.41603	0.145	0.005	0.00185467				Fdxr	4.19037e-08	-1.4072	0.128	0.281
Prickle2	7.86924e-08	2.83436	0.166	0.016	0.0018665				Pygl	4.58166e-08	-1.20839	0.168	0.333
0610040F04Rik	7.87669e-08	3.35447	0.164	0.016	0.00186827				Sult1c2	5.95402e-08	-1.12225	0.119	0.276
Anxa5	9.33397e-08	1.55766	0.364	0.177	0.00221392				4930481A15Rik	6.57053e-08	-1.54359	0.099	0.24
Gm12860	9.49918e-08	5.65182	0.133	0	0.00225311				Tnfsf15	7.54502e-08	-2.09537	0.033	0.13
Casp12	9.49918e-08	6.02422	0.133	0	0.00225311				Col27a1	7.67302e-08	-1.78776	0.028	0.12
Rnf217	9.9971e-08	1.31393	0.365	0.161	0.00237121				Tarsl2	7.78866e-08	-1.86765	0.036	0.135
Gm15347	1.09443e-07	2.44767	0.224	0.057	0.00259587				Prps2	8.08735e-08	-1.26787	0.169	0.333
Cfl1	1.10448e-07	1.69171	0.293	0.104	0.00261972				Aebp1	8.73982e-08	-1.16545	0.109	0.26
Cd24a	1.1586e-07	1.56374	0.339	0.151	0.00274809				Kcnj15	9.37638e-08	-1.76159	0.077	0.203
Scin	1.21925e-07	2.42861	0.26	0.089	0.00289194				Slc22a2	9.8697e-08	-2.12516	0.024	0.109
Fat1	1.26746e-07	1.62009	0.306	0.12	0.00300629				Pdlim1	1.11451e-07	-1.59059	0.05	0.161
Plekha2	1.27503e-07	2.62665	0.187	0.031	0.00302424				Gpr162	1.12205e-07	-2.03693	0.037	0.135
Rpl9-ps6	1.3459e-07	1.22119	0.558	0.385	0.00319235				Ccdc68	1.13109e-07	-1.47336	0.108	0.25
Vwa5a	1.39039e-07	1.38563	0.36	0.167	0.00329788				4931406C07Rik	1.15428e-07	-1.3255	0.165	0.328
Rps14	1.417e-07	1.25305	0.472	0.286	0.00336097				Tns2	1.19989e-07	-1.47519	0.106	0.245
Tmem140	1.5685e-07	2.16644	0.228	0.062	0.00372033				Retsat	1.33481e-07	-1.97365	0.055	0.167
Dynll1	1.63657e-07	1.79883	0.293	0.115	0.00388178				AI314278	1.49313e-07	-2.01736	0.04	0.141
Samd4	1.82907e-07	2.30482	0.185	0.031	0.00433838				Mpv17l	1.77399e-07	-1.02008	0.27	0.443
A230050P20Rik	1.9329e-07	3.15439	0.165	0.021	0.00458464				Cd36	2.02014e-07	-1.97836	0.022	0.104
Bdkrb2	2.00291e-07	2.84963	0.166	0.021	0.0047507				Prickle1	2.04109e-07	-1.1484	0.198	0.37
Birc2	2.04944e-07	1.4185	0.409	0.234	0.00486107				Acadvl	2.06126e-07	-1.2459	0.128	0.276
Zc3hav1	2.18936e-07	1.66727	0.261	0.083	0.00519295				Adam22	2.42472e-07	-1.09428	0.206	0.375
Rsad2	2.3321e-07	4.46012	0.136	0.005	0.00553152				Tmem64	2.43364e-07	-1.36428	0.103	0.24
Ciita	2.49284e-07	6.03178	0.125	0	0.00591278				Pxmp2	2.74717e-07	-1.60536	0.066	0.182
Casp4	2.49285e-07	6.04731	0.125	0	0.00591278				Smim20	2.97833e-07	-1.13788	0.135	0.286
Adamts9	2.72861e-07	2.14293	0.33	0.156	0.006472				Dab2	3.08502e-07	-1.29917	0.127	0.271
Galnt3	2.88887e-07	1.84451	0.293	0.12	0.00685211				Odc1	3.25253e-07	-1.10599	0.146	0.302
Lgals3bp	2.92782e-07	2.98553	0.17	0.026	0.00694451				Gcgr	3.48473e-07	-1.28417	0.111	0.255
Stxbp1	3.10132e-07	1.84776	0.204	0.047	0.00735603				Acsl3	3.54238e-07	-1.30941	0.136	0.281
Prdx4	3.21719e-07	2.7531	0.185	0.036	0.00763084				Xylb	3.74812e-07	-1.64022	0.047	0.151
Gm7030	3.43079e-07	5.3833	0.123	0	0.0081375				Hlf	3.95019e-07	-1.38924	0.121	0.266
Rbl1	3.4544e-07	2.47306	0.179	0.031	0.00819349				Gm6712	4.02356e-07	-1.14836	0.139	0.286
Grn	3.73628e-07	1.69507	0.293	0.12	0.00886208				Cdca7l	4.24467e-07	-1.37458	0.062	0.177
Havcr1	4.02314e-07	5.71975	0.121	0	0.00954249				mt-Nd6	4.28324e-07	-1.8818	0.055	0.161
AC135964.2	4.22973e-07	3.54566	0.174	0.031	0.0100325				Gsta4	4.46055e-07	-1.57286	0.063	0.177
Ptpn12	4.28708e-07	1.10587	0.445	0.25	0.0101685				Hnf4a	5.1568e-07	-1.36474	0.059	0.172
Runx1	4.71647e-07	5.98267	0.12	0	0.011187				Bcar3	5.28665e-07	-1.0052	0.29	0.453
Hip1	4.93653e-07	2.49512	0.166	0.026	0.0117089				Ror2	5.32063e-07	-2.16942	0.059	0.167
Pdlim7	5.11094e-07	3.98164	0.139	0.01	0.0121226				Gm45846	5.80499e-07	-1.48616	0.074	0.193
Relb	5.42187e-07	2.53508	0.174	0.031	0.0128601				Ptgs1	5.88353e-07	-1.62881	0.062	0.172
Gm48749	5.52781e-07	5.79677	0.119	0	0.0131114				Gm17767	6.09189e-07	-1.55685	0.049	0.151
Ankrd45	5.54516e-07	1.7193	0.231	0.068	0.0131526				Scn4b	6.38593e-07	-1.21749	0.152	0.297
Isg15	6.15091e-07	3.89052	0.137	0.01	0.0145893				Stard10	6.77628e-07	-1.08221	0.197	0.354
Lrrc4	6.16699e-07	1.43526	0.352	0.172	0.0146275				Fabp3	6.88455e-07	-1.04662	0.166	0.318
Tmem252	6.23062e-07	2.65326	0.165	0.026	0.0147784				Dlg3	6.95053e-07	-1.28963	0.141	0.286
Gsap	6.55253e-07	2.55989	0.173	0.031	0.0155419				Calml4	7.41915e-07	-1.54875	0.075	0.193
Tgm2	7.05529e-07	2.51851	0.193	0.047	0.0167344				Iscu	7.82104e-07	-1.31836	0.169	0.318
Il13ra1	7.10246e-07	1.4756	0.311	0.135	0.0168463				Klf15	9.15735e-07	-1.29976	0.107	0.24
Csrp1	7.60454e-07	1.51451	0.27	0.099	0.0180372				Frmd4a	9.17993e-07	-1.37448	0.051	0.156
Rpl18	7.6642e-07	1.09984	0.538	0.385	0.0181787				Hexdc	1.06796e-06	-1.2482	0.111	0.245
Hs3st1	7.82567e-07	3.41708	0.145	0.016	0.0185617				Mob2	1.13509e-06	-1.028	0.228	0.391
Rnf114	7.8335e-07	1.33187	0.38	0.208	0.0185803				Lpin1	1.16391e-06	-1.22067	0.092	0.219
Arl4c	7.96899e-07	2.14971	0.202	0.052	0.0189016				Dhrs11	1.16737e-06	-1.05721	0.12	0.26
Sorbs2os	8.61255e-07	1.63774	0.363	0.193	0.0204281				Slc2a4	1.17163e-06	-1.76097	0.051	0.151
Ctsc	8.90474e-07	1.45868	0.307	0.135	0.0211212				Ccdc107	1.19349e-06	-1.18638	0.112	0.25
Irf9	9.28459e-07	1.70189	0.218	0.062	0.0220221				Txndc16	1.23316e-06	-1.27893	0.146	0.292
Arap2	1.00503e-06	1.98858	0.208	0.057	0.0238384				Zbtb7c	1.2688e-06	-1.7574	0.042	0.135
Tmod3	1.02487e-06	1.33499	0.352	0.172	0.0243089				Slc25a10	1.31426e-06	-1.64096	0.054	0.156
AC139671.1	1.04024e-06	5.36654	0.113	0	0.0246735				Rab6b	1.40595e-06	-1.36398	0.128	0.26
Znrf1	1.04858e-06	1.12885	0.4	0.219	0.0248713				Nubpl	1.49457e-06	-1.05355	0.173	0.323
Rnf19b	1.05706e-06	1.92509	0.241	0.083	0.0250725				Pink1	1.51812e-06	-1.31027	0.109	0.24
Gm44686	1.06425e-06	1.55059	0.335	0.167	0.0252429				Grsf1	1.57967e-06	-1.03408	0.161	0.312
1810034E14Rik	1.07936e-06	1.78398	0.315	0.151	0.0256013				Slc35g1	1.83844e-06	-1.22033	0.144	0.286
Prkcq	1.08149e-06	3.48627	0.133	0.01	0.0256519				Abhd3	1.92809e-06	-1.8396	0.069	0.177
Krt7	1.10665e-06	1.29049	0.358	0.182	0.0262487				Ndufs6	2.0819e-06	-1.13385	0.165	0.312
Syn2	1.12512e-06	1.7095	0.273	0.109	0.0266867				Tkfc	2.10688e-06	-1.77973	0.046	0.141
Ccl8	1.21757e-06	5.84701	0.112	0	0.0288795
Cacna1h	1.42476e-06	5.36987	0.111	0	0.0337938
Rps5	1.4522e-06	1.06715	0.451	0.266	0.0344447
Tpm1	1.45348e-06	1.67802	0.266	0.104	0.0344751
Gm16599	1.47834e-06	1.10015	0.476	0.302	0.0350648
Rps10	1.49715e-06	1.27384	0.375	0.198	0.035511
Maml1	1.49965e-06	1.07129	0.413	0.229	0.0355702
Fstl1	1.52151e-06	3.5491	0.139	0.016	0.0360887
Mmp7	1.66677e-06	5.91128	0.109	0	0.0395341
Vars	1.84874e-06	1.98606	0.203	0.057	0.0438503
Psme2	1.9494e-06	5.22956	0.108	0	0.0462377
Coq8b	2.00826e-06	1.43271	0.285	0.12	0.0476338
Msrb1	2.10039e-06	1.2808	0.322	0.151	0.0498193

## Sheet: DCT.bc.to.bl6
Table S2: Results from differential gene expression TCMR vs. Control
Differential expression was assessed using two-sided Wilcoxon rank-sum tests with Benjamini–Hochberg correction for multiple testing.
Distal convoluted tubules			*This Fold Change was calculated between [BALB/c to C57BL/6 ] and [BALB/c to BALB/c]
Gene upr.	p_val	avg_log2FC*	pct.1	pct.2	p_val_adj				Gene downr.	p_val	avg_log2FC*	pct.1	pct.2	p_val_adj
H2-K1	4.40856e-117	5.8605	0.995	0.102	1.04567e-112				Klhl3	6.3486e-61	-1.43268	0.836	0.987	1.50582e-56
B2m	6.16911e-115	5.52264	0.99	0.145	1.46325e-110				Gm26870	1.98603e-55	-5.66865	0.023	0.548	4.71067e-51
Iigp1	1.05814e-113	10.6125	0.956	0.007	2.50979e-109				Cables1	2.79644e-49	-2.69959	0.258	0.759	6.63288e-45
H2-D1	1.90094e-112	5.0715	0.984	0.162	4.50883e-108				Slc16a7	3.87332e-48	-1.32484	0.89	1	9.18713e-44
Spp1	3.00431e-100	3.01047	0.995	0.746	7.12591e-96				Pvalb	1.37838e-42	-2.47292	0.274	0.743	3.26939e-38
Cd74	2.03073e-97	5.51888	0.906	0.079	4.81668e-93				Trpm6	1.50979e-40	-1.4429	0.723	0.947	3.58107e-36
Ly6a	5.92423e-91	3.59976	0.943	0.297	1.40517e-86				Prkd1	2.09787e-37	-1.76503	0.705	0.917	4.97595e-33
Stat1	8.12042e-86	6.08629	0.83	0.059	1.92608e-81				Slc8a1	1.54234e-36	-1.94918	0.692	0.941	3.65829e-32
Tmsb4x	1.26866e-73	3.35708	0.898	0.284	3.00913e-69				Sgms2	1.40413e-34	-1.25836	0.859	0.983	3.33045e-30
Irgm1	1.47094e-63	5.25453	0.687	0.043	3.48892e-59				Defb1	1.48117e-31	-1.27743	0.624	0.904	3.51318e-27
H2-Ab1	6.7492e-62	5.24094	0.668	0.033	1.60084e-57				Kalrn	1.7264e-31	-1.39317	0.507	0.865	4.09485e-27
H2-Eb1	5.25733e-61	7.19501	0.632	0.01	1.24699e-56				Slc22a23	6.60773e-31	-1.39614	0.533	0.861	1.56729e-26
Psmb8	7.79737e-60	8.31552	0.616	0.003	1.84946e-55				Cdk14	2.74582e-30	-1.30725	0.674	0.924	6.5128e-26
Gbp2b	1.18259e-58	8.43882	0.608	0.003	2.80497e-54				Egf	2.6769e-29	-2.06465	0.721	0.901	6.34933e-25
Gbp7	1.31927e-56	5.57276	0.627	0.033	3.12918e-52				Esrrb	2.15e-27	-1.33149	0.614	0.865	5.09958e-23
Ubd	1.99965e-53	8.09964	0.567	0.003	4.74298e-49				Pde7b	3.29223e-23	-1.13035	0.666	0.901	7.80883e-19
Nlrc5	2.66011e-53	5.0355	0.603	0.03	6.30952e-49				Ppp1r1a	1.46851e-22	-1.16821	0.493	0.809	3.48316e-18
H2-Aa	3.64447e-52	5.14795	0.593	0.026	8.64432e-48				Tox3	1.03949e-21	-1.03761	0.721	0.908	2.46557e-17
Gm16685	4.09478e-51	3.16727	0.71	0.142	9.71241e-47				Kl	8.03496e-21	-1.16536	0.608	0.855	1.90581e-16
Ly6e	3.75944e-50	3.26404	0.684	0.122	8.91701e-46				D630024D03Rik	3.49183e-19	-1.4005	0.311	0.627	8.28228e-15
H2-Q4	1.29527e-49	5.18733	0.564	0.02	3.07224e-45				Gm32569	1.24558e-18	-1.11737	0.548	0.789	2.9544e-14
Tap1	1.03969e-47	6.28973	0.53	0.01	2.46603e-43				Slc34a1	1.2142e-17	-1.58899	0.188	0.495	2.87997e-13
Gm26917	2.49573e-45	1.6151	0.935	0.736	5.91962e-41				Gm2115	2.10766e-17	-2.29658	0.102	0.363	4.99916e-13
Tnfsf10	1.18399e-43	3.47284	0.616	0.109	2.8083e-39				Fnip2	2.45875e-17	-1.00538	0.392	0.696	5.8319e-13
Irgm2	2.31936e-42	5.08227	0.509	0.026	5.5013e-38				Pdcd4	3.41428e-17	-1.85216	0.131	0.413	8.09832e-13
Tapbp	2.5899e-41	3.20149	0.601	0.109	6.14299e-37				Asb11	5.59819e-17	-3.23066	0.037	0.254	1.32783e-12
H2-T23	1.48844e-40	4.72049	0.496	0.026	3.53043e-36				Fam214a	7.71871e-17	-1.1749	0.475	0.733	1.8308e-12
Id2	5.83737e-40	2.5444	0.702	0.231	1.38457e-35				Klhl24	1.73194e-16	-1.40161	0.235	0.538	4.10799e-12
Pigr	1.814e-39	2.50528	0.671	0.175	4.30263e-35				5330417C22Rik	2.74495e-16	-1.86111	0.235	0.492	6.51075e-12
Wfdc2	6.47508e-38	1.63868	0.859	0.508	1.53582e-33				Fgf9	3.21901e-16	-1.37172	0.352	0.627	7.63516e-12
Parp14	6.58534e-37	4.36638	0.483	0.04	1.56198e-32				Gm49272	3.86202e-16	-1.68982	0.146	0.422	9.16032e-12
Tmem176a	1.61405e-36	2.00744	0.773	0.333	3.82836e-32				Tef	3.95026e-16	-1.39977	0.238	0.531	9.36961e-12
Actb	1.06257e-35	1.87804	0.83	0.475	2.52031e-31				Ccnd3	1.40215e-15	-1.2435	0.326	0.604	3.32576e-11
Psmb9	6.79515e-35	5.92112	0.415	0.01	1.61174e-30				Top3b	2.31631e-15	-1.0759	0.454	0.726	5.49405e-11
Gm4951	6.42503e-34	9.0335	0.389	0	1.52395e-29				Gatm	4.92421e-15	-2.39537	0.05	0.264	1.16797e-10
Slc25a30	4.09188e-33	1.88257	0.836	0.591	9.70553e-29				Fbxl20	2.47759e-14	-1.14507	0.266	0.551	5.87659e-10
Irf1	6.32452e-33	4.65247	0.436	0.036	1.50011e-28				Nr1d2	4.27796e-14	-1.18831	0.319	0.581	1.01469e-09
Gm12216	6.64765e-33	2.41511	0.629	0.205	1.57676e-28				Ggnbp1	4.92681e-14	-1.77568	0.146	0.386	1.16859e-09
Tap2	6.98615e-33	3.41527	0.483	0.069	1.65705e-28				Gm16010	7.62431e-14	-2.4627	0.044	0.238	1.80841e-09
Gls	7.41753e-33	1.25676	0.963	0.888	1.75936e-28				Miox	9.40925e-14	-1.84676	0.128	0.373	2.23178e-09
Cd52	1.56064e-32	7.04586	0.381	0.003	3.70169e-28				Mertk	1.16643e-13	-1.28588	0.308	0.584	2.76666e-09
Ifitm3	2.39262e-32	4.87027	0.41	0.02	5.67506e-28				Crebrf	4.25575e-13	-1.26109	0.274	0.531	1.00942e-08
Olfr56	4.89336e-32	6.74782	0.381	0.007	1.16066e-27				Tbxas1	1.56265e-12	-1.76913	0.188	0.419	3.70646e-08
Bst2	7.24576e-32	4.37201	0.42	0.03	1.71862e-27				Sgsm1	4.90015e-12	-1.56228	0.149	0.373	1.16227e-07
Herc6	1.15212e-29	2.98067	0.512	0.119	2.73272e-25				Fam81a	5.84125e-12	-1.08678	0.279	0.521	1.38549e-07
Fth1	2.50749e-29	1.01795	0.977	0.861	5.94752e-25				Gabarapl1	8.33509e-12	-1.03007	0.54	0.716	1.977e-07
Clu	6.44778e-29	2.04842	0.702	0.35	1.52935e-24				Galm	8.55841e-12	-1.32496	0.266	0.492	2.02997e-07
Tpt1	1.21023e-28	1.27581	0.869	0.551	2.87054e-24				Lrrc66	1.0855e-11	-1.2853	0.256	0.482	2.57469e-07
Naaladl2	2.05597e-28	1.48787	0.778	0.436	4.87656e-24				Rmnd5a	1.72608e-11	-1.20328	0.185	0.416	4.09409e-07
AW112010	9.80894e-28	8.48145	0.326	0	2.32658e-23				Pdzrn3	2.5266e-11	-1.72759	0.133	0.34	5.99285e-07
Gbp2	2.49703e-26	6.70246	0.319	0.003	5.92271e-22				Aebp1	4.94931e-11	-1.33439	0.167	0.386	1.17393e-06
Ccl5	2.72926e-26	6.12631	0.324	0.007	6.47353e-22				Col27a1	5.3533e-11	-1.40254	0.175	0.396	1.26975e-06
Cd274	2.85184e-26	5.39321	0.345	0.02	6.76427e-22				Slc5a2	6.23819e-11	-2.42174	0.026	0.172	1.47964e-06
H2-T22	5.19193e-26	3.21912	0.413	0.059	1.23147e-21				Mxi1	6.56444e-11	-1.69008	0.144	0.347	1.55702e-06
Rnf213	1.98765e-25	1.94408	0.64	0.304	4.71451e-21				Cntn3	9.24628e-11	-2.28919	0.076	0.251	2.19312e-06
Tmem176b	8.61808e-25	1.74941	0.653	0.274	2.04412e-20				Dnase1	1.12396e-10	-2.8219	0.029	0.172	2.66592e-06
Stat2	1.14207e-24	2.92256	0.446	0.099	2.70888e-20				Ybx2	1.14047e-10	-1.70399	0.084	0.267	2.70508e-06
Rpl9-ps6	1.57776e-24	1.71231	0.634	0.284	3.7423e-20				Acaa1b	1.45544e-10	-2.62844	0.031	0.175	3.45216e-06
Lcn2	3.19135e-24	4.96107	0.326	0.02	7.56957e-20				Gpam	1.49637e-10	-1.77804	0.099	0.287	3.54923e-06
Oasl2	5.42213e-24	5.48981	0.305	0.01	1.28608e-19				Irs2	2.49232e-10	-1.7715	0.104	0.294	5.91153e-06
Rps20	1.03626e-22	1.43975	0.731	0.439	2.45791e-18				Ass1	2.57474e-10	-1.40283	0.117	0.32	6.10703e-06
Rplp1	2.94663e-22	1.46362	0.692	0.356	6.9891e-18				Ces1d	3.23261e-10	-2.3654	0.018	0.149	7.66742e-06
Nuak2	3.07959e-22	2.10681	0.59	0.264	7.30448e-18				Rgs11	3.99809e-10	-1.48431	0.123	0.317	9.48306e-06
Cxcl10	5.87386e-22	8.20426	0.264	0	1.39322e-17				Dusp15	5.62208e-10	-2.85055	0.031	0.168	1.3335e-05
Gm12185	7.52538e-22	6.7167	0.269	0.003	1.78494e-17				Wfdc15b	6.08731e-10	-1.39868	0.264	0.459	1.44385e-05
Rps29	8.53609e-22	1.33324	0.747	0.455	2.02467e-17				Cyb5rl	8.82511e-10	-1.21416	0.238	0.439	2.09323e-05
H2-Q7	1.39621e-21	6.38145	0.266	0.003	3.31168e-17				Rab27a	9.74553e-10	-1.04134	0.35	0.571	2.31154e-05
Rpl32	3.33271e-21	1.68088	0.64	0.3	7.90486e-17				Gm42697	1.07746e-09	-1.80033	0.089	0.261	2.55563e-05
Calr	8.77182e-21	1.88413	0.551	0.241	2.08059e-16				Slc5a12	1.28984e-09	-2.50069	0.021	0.145	3.05938e-05
Tmsb10	1.2761e-20	3.40216	0.329	0.043	3.02678e-16				Ranbp3l	1.34572e-09	-1.31747	0.146	0.34	3.19192e-05
Pla2g16	2.05003e-20	2.92379	0.358	0.063	4.86245e-16				Pamr1	1.56834e-09	-1.34143	0.151	0.353	3.71994e-05
F830016B08Rik	2.40968e-20	8.5135	0.245	0	5.71552e-16				Isyna1	2.39362e-09	-1.52244	0.112	0.294	5.67742e-05
Lyz2	4.93025e-20	4.74861	0.269	0.013	1.16941e-15				Cwh43	4.78297e-09	-1.11338	0.332	0.531	0.000113447
Gbp3	5.67904e-20	6.31233	0.248	0.003	1.34701e-15				Ptgs1	5.23324e-09	-2.69641	0.029	0.152	0.000124127
Gm4841	1.94846e-19	8.12457	0.235	0	4.62155e-15				Atp6v1c2	6.52688e-09	-1.6701	0.084	0.244	0.000154811
Tgtp2	3.27383e-19	7.66651	0.232	0	7.7652e-15				Pdgfc	7.73068e-09	-1.08561	0.245	0.446	0.000183364
mt-Co3	3.66718e-19	1.02228	0.898	0.693	8.69818e-15				Depdc1b	8.85861e-09	-1.4995	0.089	0.254	0.000210117
Gm6034	5.73605e-19	4.73974	0.261	0.017	1.36053e-14				Jmy	1.02122e-08	-1.13593	0.157	0.347	0.000242223
Psmb10	2.14776e-18	3.18226	0.292	0.033	5.09428e-14				Prox1	1.07926e-08	-1.00109	0.285	0.485	0.00025599
Napsa	9.74709e-18	1.17792	0.775	0.515	2.31191e-13				Nat8f1	1.18228e-08	-1.47442	0.097	0.261	0.000280425
Gbp8	1.19146e-17	6.22515	0.227	0.007	2.82602e-13				Neu2	1.85773e-08	-1.50948	0.076	0.228	0.000440634
Vcam1	1.24046e-17	5.97881	0.227	0.007	2.94225e-13				Gm42962	2.00297e-08	-1.9451	0.06	0.198	0.000475084
Nrg1	2.37451e-17	1.31587	0.681	0.393	5.6321e-13				Tcp11l2	2.15924e-08	-1.82985	0.063	0.205	0.000512151
Rpsa	2.81602e-17	1.26325	0.627	0.323	6.67931e-13				Nfatc2	2.45489e-08	-1.19938	0.133	0.31	0.000582275
Nrxn3	3.5285e-17	1.46452	0.611	0.281	8.36924e-13				Dnah11	2.64588e-08	-1.34523	0.097	0.257	0.000627577
Parp9	4.15699e-17	2.56082	0.35	0.086	9.85996e-13				Mapk15	3.06915e-08	-1.16494	0.154	0.333	0.000727972
Nmi	5.42112e-17	2.20439	0.394	0.119	1.28584e-12				Gm13052	3.38503e-08	-1.03959	0.188	0.376	0.000802894
Rpl27a	5.6165e-17	1.43365	0.585	0.297	1.33218e-12				A330032B11Rik	4.38766e-08	-1.76638	0.133	0.3	0.00104071
S100a11	6.52006e-17	1.82525	0.486	0.198	1.54649e-12				Grin3a	4.88626e-08	-1.95319	0.089	0.238	0.00115897
S100a1	8.21865e-17	1.2894	0.684	0.439	1.94938e-12				Lrrc52	6.75592e-08	-1.29435	0.086	0.238	0.00160244
Erap1	3.52785e-16	2.15741	0.368	0.099	8.3677e-12				Afm	9.49144e-08	-1.78899	0.102	0.251	0.00225128
H2-Q6	3.69765e-16	5.69545	0.204	0.003	8.77045e-12				Mapk10	1.13434e-07	-1.28095	0.149	0.317	0.00269054
Cxcl9	4.03643e-16	7.33927	0.196	0	9.57401e-12				Gdi1	1.13531e-07	-1.44621	0.112	0.267	0.00269285
Serping1	7.50274e-16	4.26074	0.222	0.013	1.77957e-11				AC135964.1	1.17636e-07	-1.57805	0.07	0.208	0.00279021
Gm10073	8.0998e-16	1.30826	0.637	0.38	1.92119e-11				Fbxo32	1.20951e-07	-1.54912	0.047	0.172	0.00286883
Rasgrp1	8.16638e-16	4.74807	0.214	0.01	1.93698e-11				Mettl27	1.91476e-07	-1.79827	0.063	0.191	0.00454162
Lgals3	1.70786e-15	2.21521	0.376	0.116	4.05088e-11				C130050O18Rik	1.94205e-07	-2.0866	0.06	0.185	0.00460635
Ifi27	3.97882e-15	2.3091	0.352	0.102	9.43737e-11				Srl	2.12044e-07	-1.33018	0.128	0.284	0.00502948
C1qa	4.57461e-15	5.76787	0.191	0.003	1.08505e-10				Fam107a	2.40111e-07	-1.18328	0.188	0.353	0.00569518
Wdr89	5.74481e-15	1.21878	0.642	0.389	1.36261e-10				Hbp1	3.95235e-07	-1.10251	0.17	0.34	0.00937458
Ddx58	1.08487e-14	1.87447	0.402	0.145	2.57321e-10				Crocc	4.33386e-07	-1.28342	0.133	0.287	0.0102795
Rps19	1.42582e-14	1.50642	0.527	0.274	3.3819e-10				Gm15848	5.39033e-07	-1.60538	0.102	0.244	0.0127853
Ddx60	1.43427e-14	4.22249	0.217	0.02	3.40196e-10				Gm6277	5.87708e-07	-1.35414	0.144	0.294	0.0139399
Patl2	1.83011e-14	3.87717	0.217	0.02	4.34083e-10				Cntd1	6.41429e-07	-1.25363	0.133	0.281	0.0152141
S100a10	2.16826e-14	2.40212	0.313	0.079	5.14289e-10				Mgam	8.0481e-07	-1.20552	0.146	0.3	0.0190893
Acadl	2.36495e-14	1.18165	0.64	0.373	5.60942e-10				Slc9a2	8.09195e-07	-1.00798	0.219	0.38	0.0191933
Piezo1	3.61829e-14	1.29863	0.587	0.307	8.58223e-10				Maob	1.13514e-06	-1.65603	0.078	0.205	0.0269243
C3	7.65977e-14	3.32711	0.238	0.036	1.81682e-09				Gm48779	1.18654e-06	-2.14742	0.034	0.135	0.0281435
Sh3bgrl3	1.42173e-13	2.2808	0.305	0.079	3.37221e-09				Zfp395	1.32085e-06	-1.30751	0.12	0.264	0.0313293
Xaf1	1.51853e-13	4.18629	0.193	0.013	3.6018e-09				Slc22a8	1.4625e-06	-1.89392	0.037	0.139	0.0346891
Il7	2.04304e-13	1.94546	0.287	0.066	4.84589e-09				Gm4593	1.47335e-06	-1.53944	0.104	0.238	0.0349463
Psme1	3.92793e-13	1.81064	0.368	0.132	9.31665e-09				Gm32647	1.52566e-06	-1.53732	0.128	0.267	0.0361871
Parp10	5.81735e-13	2.32125	0.295	0.076	1.37982e-08				Mir670hg	1.6962e-06	-2.2763	0.052	0.158	0.0402321
Rpl21	9.94766e-13	3.68585	0.201	0.023	2.35949e-08				Hdac5	1.9653e-06	-1.52215	0.057	0.172	0.0466149
Dysf	1.30185e-12	1.88161	0.389	0.152	3.08786e-08				Tmem8	2.07072e-06	-1.43593	0.065	0.185	0.0491153
Ly75	2.02453e-12	2.30578	0.305	0.092	4.80197e-08
Akt3	2.41794e-12	1.2749	0.501	0.257	5.7351e-08
Rpl14	2.50963e-12	1.24315	0.572	0.333	5.95258e-08
C4b	2.58567e-12	6.85163	0.149	0	6.13295e-08
Rps16	3.26508e-12	1.47713	0.452	0.211	7.74443e-08
Tspo	4.27018e-12	1.42353	0.475	0.238	1.01284e-07
S100a6	5.10548e-12	2.03609	0.305	0.092	1.21097e-07
Heph	1.12246e-11	1.17262	0.52	0.281	2.66237e-07
Isg15	1.23695e-11	4.06929	0.157	0.007	2.93393e-07
Tapbpl	1.31889e-11	4.34919	0.162	0.01	3.12827e-07
Rtp4	1.91343e-11	3.90985	0.167	0.013	4.53846e-07
Dock10	1.93057e-11	1.69193	0.384	0.158	4.57912e-07
Ifi44	2.74598e-11	6.64449	0.136	0	6.51318e-07
Gbp5	2.94257e-11	5.32064	0.144	0.003	6.97947e-07
Rps27a	3.01992e-11	1.18585	0.54	0.3	7.16296e-07
Ctss	4.42104e-11	5.23014	0.141	0.003	1.04863e-06
C1qb	4.42104e-11	5.31583	0.141	0.003	1.04863e-06
Rps11	4.42477e-11	1.49539	0.42	0.198	1.04951e-06
Lgals1	7.78416e-11	2.80105	0.222	0.05	1.84632e-06
Rps24	8.605e-11	1.02836	0.601	0.403	2.04102e-06
Ifit2	8.66941e-11	3.02351	0.185	0.026	2.0563e-06
Birc3	9.60612e-11	1.82228	0.352	0.145	2.27848e-06
Cd47	1.05697e-10	1.14805	0.507	0.287	2.50702e-06
Plac8	1.08985e-10	4.57056	0.144	0.007	2.58501e-06
Nsun7	1.69555e-10	2.45665	0.235	0.059	4.02169e-06
Socs1	1.78001e-10	6.52081	0.125	0	4.222e-06
Txn1	2.6322e-10	1.31124	0.42	0.201	6.24332e-06
Rpl4	2.79203e-10	1.44581	0.394	0.188	6.62241e-06
Rpl17	3.28129e-10	1.31299	0.467	0.257	7.78289e-06
Havcr1	3.38956e-10	4.34786	0.144	0.01	8.03969e-06
Rps23	3.58108e-10	1.16234	0.543	0.34	8.49398e-06
Nfkbiz	4.38515e-10	1.46354	0.405	0.195	1.04011e-05
Zbp1	4.50119e-10	6.51351	0.12	0	1.06764e-05
Rpl27-ps3	4.83425e-10	1.01872	0.559	0.343	1.14664e-05
Samhd1	4.85658e-10	2.06923	0.287	0.102	1.15193e-05
Gm20663	5.11762e-10	3.33488	0.185	0.033	1.21385e-05
Ppa1	5.32096e-10	2.58162	0.191	0.036	1.26208e-05
Cyba	5.35528e-10	1.45313	0.423	0.224	1.27022e-05
Rplp0	6.10844e-10	1.09637	0.561	0.347	1.44886e-05
Calm1	6.30188e-10	1.41912	0.394	0.191	1.49474e-05
Rbl1	6.85362e-10	3.59836	0.159	0.02	1.62561e-05
Hbb-bs	7.15961e-10	5.41913	0.125	0.003	1.69819e-05
Rps9	8.50087e-10	1.12584	0.556	0.376	2.01632e-05
Spns2	8.64955e-10	3.32135	0.159	0.02	2.05159e-05
Dynll1	9.35336e-10	1.64081	0.305	0.116	2.21852e-05
Mgp	1.03981e-09	3.12348	0.146	0.013	2.46633e-05
Col5a2	1.1063e-09	3.43211	0.264	0.092	2.62403e-05
Ltc4s	1.17058e-09	2.15726	0.253	0.079	2.7765e-05
Idnk	1.187e-09	1.54792	0.332	0.135	2.81544e-05
Epsti1	1.27239e-09	4.65408	0.123	0.003	3.01797e-05
Rab5c	1.38833e-09	1.38146	0.384	0.185	3.29298e-05
Unc93b1	1.52882e-09	1.76433	0.269	0.089	3.62622e-05
Apoe	2.47906e-09	1.42316	0.358	0.162	5.88009e-05
Clec2d	2.95293e-09	1.42661	0.449	0.261	7.00406e-05
Gm7030	3.00432e-09	3.18783	0.146	0.017	7.12594e-05
Jun	3.05353e-09	2.55629	0.193	0.043	7.24266e-05
Hmgcs1	3.24596e-09	1.35439	0.538	0.35	7.6991e-05
Rpl22	3.84807e-09	1.20515	0.454	0.264	9.12723e-05
Tubb5	3.872e-09	2.69147	0.18	0.036	9.18399e-05
Tmbim4	4.02542e-09	1.07395	0.483	0.274	9.5479e-05
Col1a2	4.49072e-09	6.5032	0.107	0	0.000106515
Tyrobp	4.49072e-09	6.58808	0.107	0	0.000106515
Pfn1	4.68392e-09	1.29866	0.42	0.231	0.000111098
Pycard	4.80195e-09	2.17662	0.222	0.063	0.000113898
AU020206	4.97625e-09	3.79949	0.123	0.007	0.000118032
Adgrg3	6.66791e-09	2.23268	0.219	0.063	0.000158156
Rpl18	6.75933e-09	1.00862	0.491	0.29	0.000160325
Coro1a	7.0916e-09	6.25381	0.104	0	0.000168206
Tmem45b	7.60916e-09	2.45379	0.172	0.033	0.000180482
Xdh	7.78699e-09	3.86637	0.12	0.007	0.0001847
Atp11a	8.52333e-09	1.01496	0.53	0.35	0.000202165
Ifi44l	8.85245e-09	3.52017	0.133	0.013	0.000209971
Cstb	1.00994e-08	1.6739	0.308	0.139	0.000239548
Pdss1	1.10723e-08	1.19942	0.373	0.175	0.000262624
Slc25a21	1.14919e-08	1.55745	0.389	0.208	0.000272576
C1qc	1.18855e-08	4.60621	0.11	0.003	0.000281913
Rps4x	1.22239e-08	1.1099	0.433	0.241	0.000289939
H2-DMa	1.24117e-08	4.47499	0.11	0.003	0.000294394
Rpl39	1.24694e-08	1.33187	0.36	0.172	0.000295761
Rpl26	1.24706e-08	1.18951	0.433	0.244	0.00029579
Rps5	1.28223e-08	1.23738	0.392	0.195	0.000304131
Tlcd2	1.3188e-08	1.10937	0.457	0.271	0.000312806
Vim	1.38021e-08	3.60099	0.131	0.013	0.000327371
Gm10036	1.40117e-08	1.19901	0.446	0.261	0.000332344
Il18bp	1.80971e-08	2.45837	0.172	0.036	0.000429245
Myof	1.85708e-08	1.25714	0.454	0.277	0.00044048
Gm32857	2.04938e-08	2.40967	0.136	0.017	0.000486092
Rps3	2.18475e-08	1.04499	0.473	0.294	0.000518201
Rps25	2.3016e-08	1.27942	0.407	0.231	0.000545917
Dtx3l	2.32138e-08	2.93227	0.141	0.02	0.000550608
Col18a1	2.56483e-08	1.16858	0.42	0.234	0.000608351
Pdia3	3.21314e-08	1.00504	0.475	0.277	0.000762124
Rps15	3.66832e-08	1.0153	0.548	0.386	0.00087009
Fam107b	3.85329e-08	1.04735	0.473	0.294	0.000913962
Tacstd2	3.94887e-08	1.63341	0.279	0.116	0.000936633
Tmem140	4.56675e-08	2.70801	0.159	0.033	0.00108319
Plau	4.71159e-08	2.2162	0.198	0.056	0.00111754
Arhgap8	5.65106e-08	2.12541	0.183	0.046	0.00134037
Adamts6	7.32884e-08	1.17313	0.41	0.241	0.00173833
Ifih1	1.0071e-07	2.06491	0.18	0.046	0.00238874
Hspa5	1.09285e-07	1.07639	0.42	0.241	0.00259214
Sqle	1.28746e-07	1.73692	0.24	0.092	0.00305374
Lgals3bp	1.50822e-07	3.69212	0.11	0.01	0.00357734
Fbxw17	1.5143e-07	2.02267	0.204	0.066	0.00359177
4930599N23Rik	1.73719e-07	1.31534	0.282	0.119	0.00412044
Tinag	1.99314e-07	1.00221	0.46	0.284	0.00472753
Pabpc1	2.18742e-07	1.10239	0.376	0.211	0.00518835
Efemp1	2.26938e-07	1.6064	0.232	0.086	0.00538275
4932411K12Rik	3.35657e-07	1.91897	0.279	0.129	0.00796146
Arf1	3.80591e-07	1.07148	0.402	0.238	0.00902723
Pea15a	3.87296e-07	1.022	0.423	0.261	0.00918627
Lurap1	3.97746e-07	1.40446	0.313	0.155	0.00943413
Upp1	4.51516e-07	2.01468	0.188	0.059	0.0107095
Rnf19b	4.55663e-07	1.68214	0.209	0.073	0.0108079
4930550C14Rik	5.07516e-07	1.50401	0.29	0.139	0.0120378
Ifi27l2a	5.82113e-07	3.62707	0.102	0.01	0.0138071
Parp12	6.17372e-07	1.12354	0.386	0.231	0.0146434
Kcnk1	6.18063e-07	1.18177	0.368	0.205	0.0146598
Pigt	6.25234e-07	1.58466	0.277	0.132	0.0148299
Rps14	7.57677e-07	1.05398	0.402	0.231	0.0179713
Acot9	8.41428e-07	1.01429	0.355	0.185	0.0199578
Pfdn5	8.98245e-07	1.08957	0.373	0.215	0.0213055
Car12	1.14177e-06	1.07949	0.397	0.241	0.0270816
Serpinb9	1.16753e-06	2.04159	0.159	0.043	0.0276927
Rab19	1.23415e-06	2.33796	0.136	0.03	0.0292727
Samd9l	1.38562e-06	1.08127	0.446	0.317	0.0328655
Gabarap	1.46874e-06	1.22026	0.363	0.215	0.034837
Ywhag	1.4775e-06	1.21644	0.332	0.175	0.0350448
H2afz	1.76373e-06	1.5132	0.258	0.119	0.0418338
Adar	2.0108e-06	1.13551	0.326	0.172	0.0476942
Rps10	2.01756e-06	1.00731	0.392	0.234	0.0478546

[truncated: 18 more sheets: CNT.bl6.to.bc, CNT.bc.to.bl6, CD-PC.bl6.to.bc, CD-PC.bc.to.bl6, CD-IC-A.bl6.to.bc, CD-IC-A.bc.to.bl6, CD-IC-B.bl6.to.bc, CD-IC-B.bc.to.bl6, EC.bl6.to.bc, EC.bc.to.bl6, IntC.bl6.to.bc, IntC.bc.to.bl6, Uro.bl6.to.bc, Uro.bc.to.bl6, PEC.bl6.to.bc, PEC.bc.to.bl6, Leuko.bl6.to.bc, Leuko.bc.to.bl6]
