# Supplementary material for: Injured epithelial cell states impact kidney allograft survival after T-cell-mediated rejection
Source: Nat Commun. 2026 Jan 28;17:1060. doi: 10.1038/s41467-026-68397-1 (PMC12852170; doi:10.1038/s41467-026-68397-1)
Supplement: Supplementary file 5 — Supplemental Data 3 [file 41467_2026_68397_MOESM5_ESM.xlsx]

## Sheet: Sheet1
Supplemental Table S4: Marker genes for PT and TAL Injury cell states used in bulk transcriptomics analyses.
PT_Injury_h1	TAL_Injury_h1	PT_Injury_h2	TAL_Injury_h2
RBP4	TMPRSS4	DCC	SLC34A2
APOM	LIX1	VCAM1	ITGB6
AZGP1	NYAP2	FAM135B	COL7A1
GLTPD2	WNT10A	FSTL3	S100A2
MSRB1	KRT7	MYO3A	SORCS3
AC093496.1	CRIP1	DLGAP1	ADAMTS1
AKR7A3	S100A14	LINC02471	RASD1
SLC5A1	LAMC2	IL32	SFRP1
ACY3	LAMB3	AC113386.1	ASIC2
TMEM174	SOD3	CDH6	UCHL1
GPT	B3GALT5	CLDN3	CDH3
ACY1	NOV	UGT2A3	SYT16
NAT8	CAPN8	HHLA2	CLDN16
MT1HL1	BCAS1	RHEX	AP1S3
MYH8	ITM2C	SULT1C4	NNMT
NEU4	TRIM29	TMEM178B	MEGF11
CYP4A11	IGFBP6	PAPLN	HPCAL4
PROC	MUC1	HAVCR1	FAM110C
DCXR	SLPI	AKR1C1	PHACTR3
CYP17A1	TSPAN8	DBNDD1	LURAP1L
SLC6A18	TACSTD2	AL157931.1	PPP1R1A
AMN	CLDN3	PIGR	STAC2
CLTRN	FXYD3	SEMA5A	SIM2
C5orf67	TUBB2B	TTLL7	VTCN1
SUSD2	PDLIM4	C19orf33	AP000757.1
SLC7A13	CTXN1	CREB5	DENND2A
CTXN3	PAPPA2	ALPK2	GPC1
CDHR5	C5orf38	FCAMR	DNAH5
PLCH2	PCSK1N	FZD1	CA4
GLYATL1	GPRC5A	MMP7	AC019117.1
SLC39A5	PLP2	KRT8	IER3
MT1H	CLDN4	TSPAN1	MIR4435-2HG
AFP	CHPF	TPM1	TCIM
HAO2	ACPP	EPHA7	LINC00511
CLDN2	TPBG	KRT18	PROM1
PCK1	DEGS2	CITED4	NLGN4Y
MT1G	TESC	PRICKLE1	PTK7
SLC22A12	AC009478.1	AKAP12	DIAPH3
RIDA	SLC16A5	UGT2B7	LINC01606
KHK	WFDC2	GFRA1	GDF15
SLC5A8	PERP	AC068234.1	MMP7
SMIM32	IRX2	TNFSF10	UPP1
GATM	CDCP1	SOX4	ITGA3
TM4SF5	FBXL16	ANO9	NUAK2
DHDH	LDHA	STAP2	LTF
ACE2	ELF3	KCNQ3	EPHB2
AGMAT	IRX1	ITGB8	SERPING1
SLC22A18	CASR	CLDN1	NAV2
SERPINA6	SDC1	SPON2	FOXQ1
RBP5	TMEM238	TMEM54	RBFOX1
DIO1	PYGB	MET	LETM2
SLC13A2	PLCD3	CLSTN2	FSTL3
AMACR	FIBIN	ANKRD33B	SPP1
GGT1	LGALS3	CDH2	HS3ST1
AGXT	EMP1	MT1E	CPM
SMIM24	PHLDA2	HSPB8	FGF13
GGH	TNFRSF12A	SERPINE2	CYTOR
SERPINA1	ADGRF1	AC092894.1	HKDC1
PDZK1IP1	HOXB2	NRG3	STAC
SLC44A4	LINC02381	LINC00621
GCHFR	LAMA3	AC018467.1
SLC27A2	PRR15L	ALKAL2
TREH	CHL1	PRUNE2
LGALS2	DPP4	TSPAN18
LGSN	ARHGEF38	SEZ6L2
NAPSA	STMN1	ELF3
ALDH6A1	CLDN19	ADGRG6
ALDH1B1	MYH14	PXDN
PEPD	MAL	PLS1
MT1F	CAPS	RASSF4
FAHD1	LINC01965	COL23A1
SLC22A7	SCHLAP1	TNFRSF12A
LINC02274	KLF5	PCA3
ACAA2	C6orf132	FAM189A1
TMEM82	AC091563.1	SLC35F3
GLYCTK	PGM2L1	VIM
ALDH8A1	TSPAN1	PTPRD
SLC2A5	MET	CLDN4
C2orf54	FAM83H	RHOB
FBP1	BAG1	AL589669.1
UNC5CL	CALCR	ARHGAP42
AHCY	GSTP1	MMP14
A1CF	DHCR24	SPX
CXCL14	AC010487.3	C12orf75
TMEM176A	KLF2	HSD3B7
UGT2A1	PSD3
CES2	BICDL2
PCK2	HSPA2
GPD1	YWHAH
CRYM	LIPH
QPRT	ANXA3
SLC25A10	RARG
GAMT	HOXA7
SLC22A11	OCLN
DNPH1	RAB3D
GLYAT	S100A11
SLC5A11	CKB
BHMT	SOX4
SLC6A19	AGPAT2
NUGGC	KRT18
