# Supplementary material for: Injured epithelial cell states impact kidney allograft survival after T-cell-mediated rejection
Source: Nat Commun. 2026 Jan 28;17:1060. doi: 10.1038/s41467-026-68397-1 (PMC12852170; doi:10.1038/s41467-026-68397-1)
Supplement: Supplementary file 8 — Source data for main figures [file 41467_2026_68397_MOESM8_ESM.xlsx]

## Sheet: Figure 1B
Figure 1B (left panel)
	Serum levels of Creatinine (mg/dl)
		BALB/c to BALB/c	C57BL/6 to C57BL/6	BALB/c to C57BL/6	C57BL/6 to BALB/c
	M1	0.17	0.17	0.42	0.61
	M2	0.17	0.17	0.42	0.79
	M3	0.17	0.17	0.27	0.52
	M4				0.92
	The staistical analysis was performed using GraphPad Prism 8.0.1.
	The screen shots below show the details of the analysis.
Figure 1B (right panel)
	Graft and animal survival
		0: Censored	The mKTx mouse was still alive at the time the observation was censored (pod 28).
		1: Event	The mKTx mouse experienced the event (death) on the given day.
		Days elapsed	C57BL/6 to BALB/c	BALB/c to C57BL/6	C57BL/6 to C57BL/6
	M1	7	1
	M2	7	1
	M3	7	1
	M4	7	1
	M5	8	1
	M6	15	1
	M7	28	0
	M8	28	0
	M1	8		1
	M2	9		1
	M3	28		0
	M4	28		0
	M5	28		0
	M6	28		0
	M7	28		0
	M8	28		0
	M1	28			0
	M2	28			0
	M3	28			0
	M4	28			0
	M5	28			0
	M6	28			0
	M7	28			0
	The staistical analysis was performed using GraphPad Prism 8.0.1.
	The screen shots below show the details of the analysis.
										Pairwise comparisons

## Sheet: Figure 1C
Figure 1C
UMAP	Individual data points are not displayed because of the high data volume and because they can be fully recapitulated from the dataset deposited at GEO (accession GSE284742).
Normalized expression matrix (Top70 genes × cell types, scaled 0–1)
Gene	Podo	PT	tL	TAL	DCT	CNT	CD-PC	CD-IC-A	CD-IC-B	EC	Leuko	IntC	Uro	PEC	Prolif
Mpp3	1	0.0022279	0.0381254	0.0280982	0.110739	0.135172	0.0493761	0.0315274	0.0257671	0.0296972	0.00055591	0.0620811	0.00561613	0.0106356	0.132805
Ggt5	1	0.0096336	0.0149891	0.00482154	0.00417099	0.0072996	0.00439306	0.00485664	0.00114136	0.0112601	0.108935	0.288418	0.0128196	0.00402193	0.00486201
Zfp385b	1	0.0244978	0.00155809	0.0183968	0.0273	0.00780259	0.00235841	0.029888	0.0972019	0.00246709	0.000941089	0.00406573	0.00180779	0.0981231	0.0101005
Tmem150c	1	0.0110295	0.023761	0.00286288	0.00750143	0.123711	0.255092	0.0100947	0.00933876	0.00540483	0.00259796	0.00549225	0.0700395	0.0282974	0.0419327
Rhbdl3	1	0.0115729	0.0714287	0.0106622	0.00757623	0.0390616	0.105249	0.0375343	0.0327339	0.00970482	0.00554848	0.124612	0.0232563	0.247927	0.0132865
Mafb	1	0.00579583	0.00846009	0.00735639	0.00872603	0.0238531	0.00626165	0.0159235	0.0458116	0.016253	0.155883	0.0324387	0.0147987	0.0279144	0.00870911
Eya4	0.823697	0.00657998	0.0169708	0.00455364	0.00545033	0.00420924	0.00543072	0.0133774	0.00182431	0.00531348	0.0260093	0.175087	0	1	0.00593122
Acpp	1	0.013344	0.0242988	0.00319249	0.0089467	0.0193895	0.142073	0.0182225	0.0115093	0.0106035	0.0524393	0.0120131	0.0419845	0.0784176	0.00733427
Ephb1	1	0.015143	0.00210086	0.00234304	0.00412936	0.00167342	0.00505203	0.0042419	0.00562306	0.265862	0.00328675	0.0169436	0.00563522	0.00433388	0.00403845
Plce1	1	0.00924792	0.0500982	0.0401117	0.0044588	0.0149184	0.0223844	0.0447966	0.00202078	0.00967089	0.00250659	0.0254946	0.0675757	0.266427	0.0467419
Usp13	1	0.0144157	0.0133121	0.0131683	0.0146592	0.0165688	0.0281276	0.0196293	0.0160798	0.022702	0.0137921	0.0947954	0.0106982	0.123623	0.0162213
Mmp23	1	0.00902122	0.00518988	0.00902336	0.0153206	0.0136305	0.0054927	0.00579186	0.00899131	0.00839044	0.0130508	0.284948	0.0698955	0.253333	0.00722614
Nupr1	1	0.00375977	0.267534	0.0158948	0.00498868	0.00565727	0.0310339	0.0276334	0.0154662	0.0228159	0.0217668	0.0397851	0.377328	0.0537852	0.00485437
Speg	1	0.00631901	0.00366127	0.00395314	0.0174432	0.00452353	0.00361034	0	0	0.0361029	0.00532459	0.371707	0.0112052	0.238094	0.00204346
Tyro3	1	0.00476509	0.0180343	0.0142776	0.00957948	0.0102784	0.143208	0.0165871	0	0.0114578	0.0195158	0.0809563	0.37542	0.0677836	0.0195826
Plat	1	0.00620873	0.0619069	0.00351214	0.0043429	0.00691646	0.0185988	0.00250592	0.00371646	0.177396	0.00861009	0.0855206	0.0401854	0.140441	0.00338689
Fzd2	1	0.00307962	0.0190834	0.0106297	0.0105722	0.0274742	0.0248434	0.0214465	0.034418	0.00492302	0.00758716	0.310847	0.0555907	0.0439655	0.0120397
Sncaip	1	0.000824479	0.00224271	0.0033007	0.00119772	0.000904	0.0022834	0.00158871	0.00207431	0.35704	0.0033228	0.0137704	0	0.228419	0.00183537
Rhpn1	1	0.0209125	0.00802122	0.00662769	0.00645379	0.00808961	0.00514338	0.00848574	0.00224883	0.00441057	0.00488418	0.00409104	0.0107486	0.0184518	0.00598363
Raver2	1	0.00372845	0.00640087	0.0286098	0.0445688	0.0192428	0.00170959	0.0118798	0.0144031	0.0102543	0.00621985	0.0347159	0.10134	0.263671	0.0346164
Arhgap28	1	0.00219354	0.109523	0.0150231	0.00806687	0.0126106	0.0138006	0.0752952	0.0813987	0.0287897	0.00537053	0.058463	0.00382663	0.17706	0.00745208
Wipf3	1	0.0135181	0.0530151	0.00800676	0.0040472	0.00398775	0.0390567	0.00306282	0.000830399	0.0102778	0.00204371	0.00629958	0.0148321	0.11968	0.00790552
Srgap1	1	0.00331952	0.00365949	0.0134309	0.0652527	0.0188462	0.00238532	0.0321333	0.045384	0.0439055	0.0015007	0.0205804	0.010674	0.122425	0.0324786
Robo2	1	0.0017426	0.00325985	0.0205511	0.00151669	0.00149526	0.00190977	0.00160532	0.0018984	0.00282287	0.0013951	0.278588	0.0223553	0.00816913	0.00440375
Tspan2	1	0.00197636	0	0.0032516	0.00124732	0.0025756	0.00724007	0	0.00546913	0.10091	0.0651884	0.0414618	0.0375542	0.0583845	0.00504304
Thsd7a	1	0.00487311	0.038989	0.0100727	0.00293325	0.00199187	0.0030733	0.00293117	0.207719	0.0534987	0.000786457	0.0363878	0.0124943	0.022995	0.00190272
Sulf1	1	0.00190632	0.000752472	0.00217795	0.00415955	0.00106382	0.00209083	0.00400609	0.0033891	0.0474397	0.00394198	0.240975	0.0650457	0.0499899	0.00527963
C1qtnf7	1	0.00105961	0.00778302	0.00131174	0.00178334	0.00162561	0.00185709	0.00186409	0	0.0180296	0.00227465	0.205935	0	0.585963	0.000402412
Npr3	1	0.00144699	0.0027491	0.00200919	0.000821318	0.00178813	0.00174378	0.00504064	0.00114149	0.184502	0.00119239	0.0111889	0	0.316298	0.000417023
Rasl11a	1	0.00228868	0.0384795	0.0074439	0.0030634	0.0322501	0.023413	0.0493454	0.0129742	0.00345055	0.00495584	0.0813926	0.0148051	0.148546	0.00992561
Synpo	1	0.00366346	0.012014	0.00430015	0.00188796	0.00339117	0.00440277	0.0044771	0.00763925	0.0947372	0.00680296	0.05918	0.0365954	0.0522741	0.00385438
Ptchd4	1	0.00705197	0.0119131	0.00851158	0.00357078	0.00341644	0.00485865	0.00787485	0.00403479	0.00332523	0.00272523	0.0105909	0	0.385377	0.00907868
C1qtnf1	1	0.0057907	0	0.00243146	0.00143591	0.00153951	0.00315961	0	0	0.00433793	0.00258163	0.138393	0	0.0450017	0
Tcf21	1	0.00221612	0.00412839	0.00197644	0.00161952	0.00306253	0.00362948	0.00377757	0.000630127	0.00875336	0.0055759	0.204075	0	0.0187416	0.00162794
Gm29266	1	0.00186969	0.00141918	0.0224487	0.0149122	0.00309688	0.00156571	0.000559941	0.00261149	0.00209905	0.000519096	0.00212041	0.00643447	0.0496242	0.0617405
Hs3st6	1	0.003581	0.00737077	0.00497794	0.00624988	0.0332657	0.0102114	0.0169988	0.00440993	0.0278008	0.00642357	0.00484664	0.017059	0	0.0136042
Nes	1	0.00294207	0.00881953	0.00201071	0.00122129	0.00270162	0.0075232	0.000730716	0.00251921	0.0594875	0.00816077	0.0453768	0.0103001	0.0863942	0.00261338
Chst1	1	0.00223036	0	0.0012943	0.00171621	0.00095792	0.000839508	0.00218565	0.000886175	0.0315574	0.0164339	0.0972078	0	0.0488991	0.00091035
Gm15866	1	0.00130178	0.00717945	0.00062365	0	0.00177013	0	0.00121417	0	0.0229952	0.00247674	0.129863	0	0.293691	0
Tdrd5	1	0.00999056	0.00236927	0.000947921	0.00121287	0.0025764	0.00555225	0.00185947	0.0010914	0.00152546	0.000913661	0.000480447	0.00489614	0	0.00102434
Kcng2	1	0.00429956	0.00385014	0.00229316	0.00272082	0.00086345	0.00503215	0	0	0.00422289	0.00718324	0.0657417	0	0	0.00506183
Foxd2	1	0.00139598	0	0.00157216	0.00437437	0.00231442	0	0	0	0.00509517	0.0151342	0.0884108	0	0.165526	0
Fgfbp1	1	0.00165305	0.0209901	0.0107259	0.015178	0.00674483	0.00340594	0	0	0.00524454	0.00229854	0.00409653	0.0323974	0.00788356	0.0135319
Cldn5	1	0.000951657	0.00221676	0.00183048	0.0024367	0.00070957	0.0016621	0	0.00157035	0.089715	0.00288557	0.00477676	0	0.00999428	0.000902676
Crb2	1	0.00277796	0.00435589	0.00585652	0.00156428	0.00133184	0.000983001	0.00703031	0	0.00130212	0.00372961	0.00109753	0	0.217061	0.00616628
Rab3b	1	0.00254932	0.00350792	0.0092044	0.00877964	0.00359126	0.00197196	0.00356913	0.00456075	0.00373121	0.00110402	0.00429936	0.0268808	0	0.00648746
Aplp1	1	0.00204869	0.00328603	0.00204753	0.00224791	0.00326508	0.0020453	0.000616745	0.0111849	0.0181544	0.00876744	0.00469086	0	0.107713	0.00279011
Podxl	1	0.000614236	0.00144436	0.000606887	0.00093026	0.00109161	0.00116625	0.000928899	0.000693663	0.0828776	0.00131539	0.00296535	0.00126916	0.00614418	0.0010518
Gm11747	1	0.00168494	0.00200138	0.000682588	0.0011874	0.00197212	0.00114272	0	0	0.00364456	0.00549664	0.0616341	0.0143847	0.0436044	0
Ntrk3	1	0.00227807	0.00266747	0.00328133	0.00166244	0.00175021	0.0018312	0.00155776	0.00349921	0.00316562	0.0113436	0.0116688	0	0.0142925	0.00180278
X9130410C08Rik	1	0.00161203	0.00271124	0.00328575	0.00171625	0.00157973	0.00466191	0.00462702	0	0	0	0.00935103	0	0.19174	0
Nebl	1	0.00119998	0.00118004	0.00187864	0.00361954	0.00243003	0.00176028	0.00183266	0.0060012	0.027188	0.00361988	0.00294197	0.00580478	0.0285821	0.00310736
Wt1	1	0.0014923	0.000751763	0.000489911	0.000947786	0.00137828	0.000534616	0.000627114	0	0.00089355	0.000278013	0.0200504	0	0.284585	0.0013627
Wt1os	1	0.00153443	0.00108941	0.000772676	0.00143168	0.000284688	0.000444513	0.000602604	0.00202298	0.00129856	0.000653941	0.0109885	0	0.272893	0.00167424
Foxd1	1	0.000421576	0.00246602	0.000941219	0.00209391	0	0.00058668	0	0.00267294	0.00189358	0.00114428	0.0265914	0.00584189	0.279719	0
Ptpro	1	0.000472814	0.000954293	0.000590107	0.000656289	0.000715906	0.000857601	0.000678956	0.000378658	0.00189669	0.0270967	0.00175984	0.00141655	0.00194699	0.000445012
Sema3g	1	0.000749314	0.000159237	0.000520746	0.000488997	0.000493814	0.00119687	0.000773321	0.000851023	0.0495799	0.000605067	0.00203616	0.000406634	0.0131539	0.000789501
Tmem54	1	0.00159416	0.0134789	0.0014108	0	0.00192074	0.00371505	0	0.00446594	0	0.00319474	0	0.0945432	0.0317022	0.00342687
Clic3	1	0.00139161	0.0033425	0.00199877	0.00135718	0.00130693	0.0175572	0.00228943	0.00206649	0.00119829	0.00153549	0.00436784	0.0269628	0.00171156	0.00143029
Sgip1	1	0.000774955	0.000742396	0.000588242	0.00111077	0.000776187	0.00116847	0.00107826	0	0.00614858	0.0039567	0.0222054	0	0.00576201	0.000277595
Sema3e	1	0.00151483	0.00133257	0.000742763	0.00109321	0.00168729	0.000918784	0.00753423	0.00252692	0.000835092	0.000464416	0.00697299	0.0263979	0.0192484	0.000325987
Cdkn1c	1	0.000839352	0.00237616	0.00104206	0.00175848	0.0016922	0.00122283	0.000669076	8.33187e-05	0.00549764	0.00115317	0.0187244	0.00418839	0.00596412	0.000841352
Gabra4	1	0.00102711	0	0.00164107	0.000512078	0.00227528	0.000450966	0	0.00213868	0.00412413	0.00141068	0.00389551	0	0.0356485	0.000913422
Wif1	1	0.000963782	0.0223358	0.00078027	0.00159841	0	0	0	0	0.00516458	0	0	0	0	0.00216514
Nxph3	1	0.00047978	0	0.00026241	0.000814984	0	0.00281147	0	0	0.00857736	0	0.0217457	0	0.0342802	0
Lmx1b	1	0.00148	0.00316289	0.000650434	0.000826178	0.00222917	0.000859961	0.00107775	0	0.000298417	0.000778802	0.000468632	0	0.0292094	0.00189322
Nphs2	1	0.000734734	0.000932178	0.00052027	0.000582925	0.000754405	0.00105703	0.00133533	0.000663447	0.00171495	0.00114273	0.00137522	0.00173345	0.0112389	0.000355371
Myom2	1	0.000795318	0	0.000732022	0.000799315	0.00127198	0.000591239	0.0021998	0.000735489	0.000469331	0.000492694	0.0015487	0	0	0.00311647
Ddn	1	0.000558319	0	0.00029718	0.000577544	0.000650495	0.000548855	0	0	0.000899608	0.000867077	0.0034085	0	0	0.00273447
Nphs1	1	0.000527106	0.000300665	0.000510726	0.000600299	0.000675873	0.000423294	0.000119034	0.000225592	0.000881601	0.000317076	0.000978679	0	0.00840559	0
Kcnj15	0.0709541	1	0.0587888	0.0400079	0.0378861	0.0530623	0.0571476	0.0765349	0.0507353	0.10928	0.0597335	0.0839838	0.0990986	0.0970567	0.0347512
St8sia1	0.0606021	1	0.0580013	0.0270301	0.0290716	0.0413979	0.058583	0.0716952	0.0443498	0.0795583	0.0886637	0.172817	0.0312926	0.180283	0.0273216
Acsm2	0.0888782	1	0.0548743	0.0419974	0.0458325	0.0583725	0.0726579	0.07879	0.0526122	0.11218	0.0394775	0.0986226	0.022176	0.0486411	0.0304012
Slc6a20b	0.0688737	1	0.0594439	0.0496085	0.0551773	0.0593448	0.0707667	0.0713829	0.0664525	0.0922146	0.0261698	0.0698926	0.01946	0.104814	0.0546693
Hunk	0.12049	1	0.105802	0.0200704	0.0209642	0.0396519	0.0373482	0.0555853	0.010671	0.0678126	0.0272516	0.255345	0.252328	0.913143	0.0256182
Ces1f	0.0769198	1	0.0510938	0.0492933	0.0403502	0.0615551	0.0584751	0.0886142	0.0503605	0.099265	0.0369111	0.0792247	0.0461785	0.0933131	0.0185796
Mogat1	0.0778345	1	0.0513985	0.0339483	0.0366697	0.0577457	0.0917731	0.0663041	0.0907284	0.110714	0.0423519	0.0974745	0.106495	0.0507534	0.0465651
X4921539H07Rik	0.0612365	1	0.0374224	0.0730915	0.0127782	0.0282781	0.0609906	0.0515542	0.0518028	0.0707057	0.00818327	0.0566115	0	0.605105	0.051305
Sypl2	0.0506286	1	0.0752047	0.0662315	0.0200078	0.0286194	0.0307619	0.0920478	0.0174347	0.0682821	0.0208831	0.0908544	0.0154504	0.137125	0.0696825
Auts2	0.663953	1	0.0719987	0.0152816	0.00955657	0.025768	0.0470637	0.0445623	0.020301	0.104034	0.00992111	0.229775	0.094235	0.33287	0.0238745
Gpm6a	0.0479968	1	0.0997343	0.0257235	0.0266136	0.0256271	0.0622764	0.255468	0.0343411	0.140213	0.0278049	0.0975244	0.0403341	0.055772	0.028998
Gm20400	0.100965	1	0.0596873	0.0326821	0.0245492	0.0362077	0.0416557	0.0760318	0.0459783	0.0892064	0.0431217	0.129972	0.122737	0.324508	0.0408697
Gm31718	0.0395691	1	0.0442244	0.0326246	0.0275088	0.0573213	0.0432287	0.0498071	0.0559176	0.0691726	0.0800615	0.103926	0.0973765	0.0631196	0.0278115
B3galt5	0.085238	1	0.0392488	0.0204229	0.0714107	0.120546	0.0920804	0.0801529	0.0352474	0.0765691	0.0181136	0.0717656	0.090363	0.124419	0.0899602
B3gat2	0.0517817	1	0.0969825	0.0323182	0.0296843	0.0589855	0.0777184	0.0951824	0.0422504	0.0891287	0.0340629	0.0822407	0.0585746	0.0866305	0.0320676
Myo7b	0.0699568	1	0.0581773	0.0316347	0.0243653	0.0543716	0.0514771	0.0599515	0.0579124	0.107042	0.0306447	0.0886738	0.031032	0.440739	0.0256812
Map3k7cl	0.0621093	1	0.102993	0.0240494	0.0214934	0.0437099	0.0561993	0.0814385	0.0402891	0.0861476	0.023781	0.202203	0.05473	0.186535	0.0259022
Pter	0.0663104	1	0.0658496	0.030235	0.0329814	0.0439903	0.063429	0.0747553	0.0407594	0.102014	0.0452204	0.0854553	0.0426174	0.0961387	0.0366364
Gm853	0.0268323	1	0.163452	0.0335103	0.0202412	0.0348821	0.0635549	0.0750335	0.0287746	0.0764115	0.030806	0.076527	0.0299969	0.310232	0.0311243
Acot12	0.0691412	1	0.0526268	0.0372539	0.0237136	0.0552331	0.0563107	0.0828632	0.0476991	0.0931411	0.0365345	0.0877294	0.026423	0.0786232	0.0307327
Wdr17	0.031412	1	0.092578	0.0321327	0.0323245	0.0212263	0.0456875	0.308749	0.0139916	0.116395	0.00917077	0.0860797	0.0172845	0.0631388	0.0359305
Prodh2	0.0544957	1	0.0663483	0.033669	0.0332798	0.0671294	0.0612436	0.108906	0.0380856	0.0843491	0.0282483	0.0909952	0.00667764	0.0661325	0.0269829
Lrp2	0.0684947	1	0.0548801	0.0336929	0.0334927	0.0518608	0.0606796	0.0678246	0.0427905	0.0910094	0.0318271	0.0781836	0.0536016	0.187384	0.0256899
Gria3	0.0597473	1	0.185048	0.0134891	0.0146774	0.0347472	0.0485619	0.0524747	0.0572212	0.0865266	0.0260415	0.139023	0.0292065	0.610172	0.0297038
Dab2	0.0888069	1	0.0465328	0.0146645	0.0148586	0.0375327	0.0576042	0.143027	0.115951	0.131499	0.0460444	0.0827786	0.0289678	0.109093	0.0276962
Hnf4g	0.0544289	1	0.058385	0.0479365	0.0272916	0.0469071	0.0483889	0.0616163	0.0717707	0.0751548	0.00754795	0.059159	0.117443	0.144757	0.0367874
Nox4	0.0627233	1	0.0397344	0.0533117	0.0288778	0.0415039	0.0402394	0.0508663	0.0264808	0.0675353	0.0153387	0.0634218	0.0540958	0.149728	0.0465337
Slc16a9	0.0691503	1	0.0561599	0.0335441	0.0323126	0.0312332	0.0414845	0.0789957	0.0362171	0.0950715	0.0285534	0.0890838	0.0503687	0.141753	0.0284221
Slc47a1	0.051399	1	0.132974	0.0278104	0.0295028	0.0422206	0.0567855	0.0711558	0.0372982	0.0928377	0.0252455	0.0673438	0.0371355	0.0788948	0.0272203
Fam83g	0.12664	1	0.0971794	0.0224404	0.0316997	0.0419212	0.101975	0.0850596	0.0409372	0.0755119	0.0210209	0.0613625	0.129518	0.0391201	0.0465802
Slc6a20a	0.0252472	1	0.0566365	0.02648	0.0301273	0.0596389	0.0706147	0.0958539	0.0519912	0.0625395	0.0345944	0.0720509	0.0258451	0.0771514	0.0502945
Keg1	0.0698341	1	0.0489248	0.0321868	0.0348185	0.0359488	0.0424776	0.0642814	0.0407395	0.0821592	0.0402026	0.0721222	0.028027	0.0656337	0.0275055
Acsm5	0.0668062	1	0.0384258	0.0310578	0.036964	0.0374545	0.0525419	0.0798394	0.056991	0.066896	0.0231416	0.0661229	0.0379491	0.0860045	0.0679795
Agxt2	0.0448746	1	0.0487609	0.0235152	0.0217	0.0514224	0.0631297	0.0620818	0.0767959	0.077497	0.0284125	0.0635924	0.0192853	0.14046	0.0296025
Hsd3b2	0.0381331	1	0.0533513	0.0252965	0.0288123	0.0419245	0.0367224	0.144069	0.0637306	0.0745988	0.0223563	0.0729936	0.0361966	0.0909359	0.0196593
Slc18a1	0.0435063	1	0.0517583	0.040135	0.0339015	0.052916	0.0224775	0.0303284	0.151404	0.0371789	0.0186511	0.0406981	0.0227663	0.0503685	0.017077
Acsm1	0.0486508	1	0.0429403	0.0278858	0.0295405	0.028978	0.0401743	0.0789415	0.0342743	0.0871571	0.0289804	0.0826197	0.0564988	0.0646636	0.0135156
Ctnna2	0.0594669	1	0.0456952	0.0318052	0.0354957	0.0479378	0.053959	0.0815658	0.023958	0.0616421	0.0111696	0.0564904	0.0198833	0.0273484	0.0751556
Enpp3	0.0569724	1	0.0623618	0.0157185	0.022701	0.038852	0.0516205	0.0800049	0.0207564	0.111422	0.0244079	0.0841198	0.0302769	0.105208	0.0426245
Slc6a15	0.0172095	1	0.0934938	0.0174487	0.0242673	0.0551296	0.0632319	0.106731	0.0217772	0.0603199	0.0147188	0.0960229	0.0362052	0.084643	0.0265168
Gm37245	0.0377022	1	0.0495148	0.0333668	0.0135945	0.0344722	0.0403019	0.0467017	0.0347645	0.0407024	0.0138217	0.027771	0.0237328	0.738303	0.024242
Slc5a11	0.0874733	1	0.0578371	0.0210238	0.0143094	0.0338582	0.052132	0.0771327	0.0459306	0.0814538	0.01681	0.0861305	0.109035	0.0729569	0.0410168
Nat8f6	0.0527157	1	0.0506965	0.0316759	0.0334752	0.0413537	0.0380976	0.065239	0.0200926	0.0873427	0.0126436	0.0449501	0.0288684	0.0430652	0.015196
Lpar3	0.0709667	1	0.0395658	0.0170118	0.0232905	0.0476072	0.043666	0.0540077	0.0573936	0.0626514	0.0457886	0.0698105	0.0103279	0.0321825	0.010423
Slc13a2	0.051001	1	0.0901632	0.0192827	0.0199826	0.035741	0.0466579	0.0867024	0.0354243	0.0707505	0.0218658	0.046989	0.0442801	0.0963873	0.0200469
Aspa	0.0857687	1	0.0664291	0.0203236	0.0220313	0.034867	0.0350823	0.072769	0.03964	0.0641941	0.02217	0.0750402	0.0246241	0.0950126	0.0256339
Glis1	0.0616461	1	0.0413821	0.0103158	0.00887726	0.0311731	0.0435487	0.0417858	0.0290862	0.153614	0.00862	0.12144	0.0292911	0.146669	0.0168337
Gm19950	0.0409358	1	0.0357776	0.0237989	0.0220384	0.0325743	0.0329301	0.0560312	0.0278938	0.0708275	0.0392327	0.0485314	0.0337617	0.0218307	0.0332444
Cyp2j13	0.0546505	1	0.0485862	0.017943	0.0221383	0.0352737	0.0502826	0.051924	0.0398044	0.0751167	0.0251948	0.0668208	0.0467773	0.0600256	0.023431
Slc13a1	0.0642008	1	0.0446408	0.0189489	0.0201936	0.032288	0.044535	0.0442622	0.0237404	0.0786905	0.0289162	0.068019	0.0384219	0.0516705	0.0247045
Cubn	0.056235	1	0.0432387	0.0221867	0.0234556	0.0319283	0.0510028	0.0562201	0.0292723	0.071797	0.0148926	0.0682705	0.0338076	0.0727116	0.0185804
Slc17a3	0.0436859	1	0.0349161	0.0213021	0.0256695	0.0327848	0.0502598	0.0552571	0.0265347	0.0739947	0.0192616	0.0582359	0.0250189	0.0517598	0.0192338
Snhg11	0.0560021	1	0.0374392	0.0146745	0.0172146	0.0334043	0.0494102	0.0812142	0.0250291	0.0579727	0.016956	0.0996722	0.076973	0.0900401	0.0196189
Hsd3b3	0.033499	1	0.0376038	0.0221992	0.0222566	0.0281454	0.0478939	0.0730752	0.0227209	0.0707218	0.0165848	0.0440714	0.00580316	0.0385746	0.0181795
Abcc2	0.0621515	1	0.0283949	0.0198783	0.0194776	0.0355478	0.0314044	0.047741	0.0319345	0.0595886	0.0237242	0.0526997	0.0471299	0.0375702	0.0258038
Gabrb3	0.0344224	1	0.0372207	0.0158454	0.018598	0.0373769	0.0458954	0.0768137	0.0366786	0.0662902	0.0102276	0.0614514	0.0478728	0.0408765	0.0227105
Acnat1	0.0629741	1	0.0231897	0.00887731	0.0128822	0.0186166	0.0366006	0.114805	0.238265	0.0645707	0.00506714	0.035326	0.0432403	0.0368444	0.00504555
A1cf	0.0438031	1	0.0455776	0.0133914	0.0189463	0.0270012	0.0379706	0.0644925	0.0265128	0.0719821	0.0128803	0.047473	0.0358384	0.0754552	0.0164751
Slco1a6	0.0266969	1	0.0382111	0.0151302	0.0156548	0.0234552	0.0456981	0.0524749	0.0178477	0.0657017	0.0161631	0.0503034	0.0285646	0.0466623	0.0211316
Slc22a30	0.0469709	1	0.0360323	0.0193334	0.013449	0.0319179	0.0399972	0.0606383	0.0317304	0.0570396	0.00835877	0.0347776	0.020693	0.0629215	0.0144293
Slc22a28	0.0535285	1	0.0458332	0.0151523	0.0101151	0.0327961	0.0406648	0.0645495	0.022912	0.0654341	0.00710584	0.0510469	0.00760253	0.0720347	0.011099
AC154546.2	0.0365771	1	0.0488095	0.0117894	0.0122524	0.02366	0.0412112	0.0451516	0.0253077	0.0610581	0.0149268	0.0496324	0.0694091	0.114581	0.00845185
Gm10732	0.0650446	1	0.0379755	0.0114843	0.00961098	0.032012	0.0472298	0.0395475	0.026368	0.0613201	0.00963132	0.0596952	0.0207844	0.0574917	0.0212548
Gm15962	0.0440422	1	0.0345549	0.017548	0.0160362	0.0169672	0.0289678	0.0323252	0.0224118	0.0541638	0.0201853	0.0385539	0.0191714	0.090916	0
Slc5a12	0.0675947	1	0.0318683	0.0124834	0.0129249	0.0351926	0.0312605	0.0455887	0.0276586	0.0542671	0.00826319	0.055124	0.00862321	0.0600786	0.00961471
Gm42397	0.0322037	1	0.0258843	0.029782	0.0100825	0.0176695	0.0166429	0.0452557	0.0103697	0.0343223	0.00552169	0.0360016	0.0070233	0.0293489	0.0197447
Nat8f3	0.0350571	1	0.0365111	0.012962	0.0128092	0.0210573	0.0347543	0.0487912	0.0166154	0.0500062	0.00699305	0.0514497	0.0278539	0.0657176	0.0172075
Gm16311	0.056039	1	0.0279123	0.00931886	0.0116797	0.0214569	0.0268585	0.0513945	0.0142774	0.0771696	0.0104694	0.0417756	0.0156986	0.0411438	0.019273
Gm35281	0.033939	1	0.0605741	0.00942196	0.00938883	0.0160776	0.0357308	0.0500855	0.0208857	0.0540662	0.0104792	0.0446946	0.0397887	0.0361558	0.0166886
Hnf4aos	0.0397967	1	0.0236708	0.00936069	0.00788799	0.0169216	0.0333851	0.0534024	0.017234	0.0477787	0.00775774	0.0365258	0.0218896	0.0315093	0.009018
Utrn	0.551067	0.134414	1	0.612092	0.474054	0.366438	0.425195	0.460584	0.560634	0.982361	0.437024	0.520258	0.403557	0.955535	0.583039
Epcam	0.0363278	0.0300746	0.55734	0.282153	0.127361	0.245425	1	0.253895	0.248733	0.0472135	0.0541981	0.0578164	0.665865	0.0950993	0.203793
Chsy3	0.0407107	0.0609543	0.944603	0.0232741	0.0187029	0.0196289	0.245537	0.0182723	0.0160689	0.311486	0.0241632	0.982245	0.247339	1	0.035273
Cald1	0.0737182	0.00562888	0.132943	0.00387297	0.0038951	0.00493491	0.0187701	0.00981067	0.00378844	0.352947	0.0161528	1	0.0131359	0.450536	0.00330866
Nfat5	0.17692	0.286716	1	0.467893	0.300247	0.298239	0.440193	0.559109	0.344359	0.570026	0.183017	0.277796	0.453084	0.471119	0.252668
Col4a6	0.181057	0.0202243	0.503338	0.103774	0.0580355	0.0329063	0.131333	0.0884877	0.0218824	0.0489385	0.00235998	0.0468375	1	0.602789	0.104579
Elovl7	0.0415291	0.172712	1	0.37499	0.288458	0.289219	0.288418	0.266269	0.367477	0.0482072	0.0229288	0.0427975	0.0863909	0.209272	0.274033
Susd4	0.0237334	0.0268094	1	0.403696	0.187917	0.375454	0.408894	0.0337239	0.0349331	0.0629129	0.0117975	0.02711	0.321059	0.084846	0.789125
Pax8	0.0341594	0.349308	1	0.233001	0.0879882	0.1748	0.372972	0.334531	0.181361	0.0395998	0.011732	0.0345493	0.140557	0.626365	0.152971
Pax2	0.0134339	0.170004	1	0.359836	0.146595	0.231963	0.712922	0.457779	0.138122	0.0474973	0.00597485	0.0326277	0.285033	0.335233	0.238407
AA986860	0.0544011	0.020537	0.841871	0.318753	0.296539	0.288914	0.445484	0.605563	0.567958	0.033899	0.0137139	0.0310299	1	0.0838373	0.2286
Klf5	0.00882844	0.0282157	0.28588	0.0210228	0.00995541	0.0262549	0.273125	0.177191	0.0143963	0.00987375	0.00989693	0.0356991	1	0.0230332	0.02181
X4930523C07Rik	0.101154	0.0533972	0.908272	0.238838	0.0973518	0.0875781	0.993104	0.325927	0.176121	0.187318	0.216628	0.308094	1	0.458153	0.239883
Dnm3	0.0185429	0.0471487	0.737097	0.541558	0.123619	0.0294189	0.453323	0.192773	0.0150629	1	0.0192054	0.203858	0.309501	0.331667	0.118793
Epn3	0.838911	0.0215646	1	0.324778	0.297341	0.395534	0.858611	0.578683	0.246466	0.033079	0.0490661	0.0555074	0.664273	0.276281	0.272208
Fam174b	0.0922415	0.0088764	0.669431	0.0325025	0.00365872	0.221715	1	0.0450655	0.021011	0.193513	0.0381378	0.070501	0.475628	0.154759	0.0316819
Bcam	0.597997	0.0345653	0.632869	0.148931	0.0789774	0.156557	1	0.140217	0.0473181	0.158206	0.0411175	0.107264	0.579421	0.336591	0.149654
Naaladl2	0.0252044	0.121246	0.763871	0.292452	0.31119	0.251845	0.564707	0.620205	1	0.0275054	0.00881246	0.187367	0.79335	0.313173	0.384488
Slc7a1	0.143448	0.0428447	1	0.149065	0.183389	0.358584	0.591439	0.330306	0.384852	0.27229	0.315129	0.184777	0.727772	0.457887	0.354314
Gls	0.0862334	0.152827	1	0.476241	0.53044	0.603844	0.274265	0.338786	0.483866	0.144149	0.152376	0.141967	0.169817	0.144481	0.479478
Fam129b	0.512297	0.0123496	0.910376	0.153897	0.230419	0.179825	0.237772	0.172519	0.188749	0.48409	0.218721	0.438619	1	0.323356	0.210872
Sox5	0.914714	0.00503828	0.784897	0.621049	0.28869	0.244325	0.481347	0.202655	0.0830042	0.054517	0.0156905	1	0.0800595	0.576865	0.335954
Chst9	0.0217113	0.0097503	0.967108	0.891133	0.0119292	0.0230966	0.375809	0.0107768	0.0188391	0.0246812	0.00309576	0.0222659	0.336201	1	0.33037
Sh2d4a	0.949243	0.0357668	1	0.530927	0.393209	0.329363	0.490174	0.493298	0.406551	0.0369873	0.00960917	0.120855	0.756203	0.428694	0.41447
Fry	0.689408	0.00644096	1	0.522905	0.238616	0.173302	0.351811	0.193714	0.173988	0.501883	0.254729	0.409473	0.481669	0.535245	0.399041
Arhgap28.1	1	0.00219354	0.109523	0.0150231	0.00806687	0.0126106	0.0138006	0.0752952	0.0813987	0.0287897	0.00537053	0.058463	0.00382663	0.17706	0.00745208
Plet1	0.0058819	0.00620778	0.282715	0.0381049	0.00929557	0.0364014	1	0.0997914	0.146548	0.0128782	0.0120761	0.0125916	0.485253	0.0100123	0.0199119
Prrg1	0.0236455	0.117033	1	0.214451	0.0860379	0.0719512	0.337249	0.106389	0.0395921	0.257949	0.0351616	0.240963	0.0752932	0.82651	0.260339
Ehf	0.0203038	0.0103779	0.931479	0.328904	0.0967301	0.25646	1	0.421578	0.15656	0.0331476	0.0237039	0.022822	0.971927	0.061331	0.233662
Spon1	0.0471301	0.0117014	0.501116	0.0306908	0.0103932	0.013921	0.0346621	0.0229139	0.0135218	0.0302404	0.320518	1	0.0436601	0.297914	0.0121737
Hspa1b	0.0401993	0.0335729	0.893592	0.156361	0.0659758	0.255879	0.975061	0.134223	0.113488	0.137363	0.0452611	0.143019	1	0.0467919	0.0860768
Tiam1	0.0216409	0.0159291	1	0.301323	0.0530586	0.0850218	0.700949	0.335491	0.150594	0.0503984	0.176083	0.0735305	0.372643	0.161606	0.339858
Ptpn14	0.56534	0.0418955	1	0.18836	0.135336	0.207174	0.449956	0.293249	0.154859	0.205261	0.009126	0.151337	0.726155	0.691643	0.184441
Tbc1d4	0.183809	0.0353998	0.906431	0.200701	0.259141	0.126504	0.0678998	0.0674867	0.0863086	0.135287	0.0833697	0.102155	0.0413055	1	0.234357
Foxc1	0.983735	0.0595216	1	0.250613	0.0136342	0.0217483	0.0262806	0.0191569	0.00414151	0.0730628	0.0259697	0.0902145	0.0513681	0.855948	0.0699905
Cldn4	0.0083208	0.0171313	0.73761	0.0319426	0.0855094	0.596425	0.598346	0.258652	0.243891	0.0334378	0.024635	0.0266652	1	0.0866452	0.0626403
Platr22	0	0.0565807	1	0.157282	0.174999	0.200256	0.447813	0.0196834	0.0419523	0.035772	0.0061413	0.0490002	0.0541539	0.760861	0.30981
Tert	0.0242417	0.0796757	1	0.0817739	0.0482779	0.0778939	0.233859	0.291674	0.102689	0.0428553	0.037118	0.129842	0.107102	0.249683	0.0582661
Chst8	0.0149998	0.00436727	0.51645	0.059815	0.0169256	0.116593	0.0330268	1	0.124306	0.163775	0.00238386	0.0418298	0.098062	0.00778776	0.0812684
Bok	0.0503256	0.0352971	1	0.0359882	0.0170631	0.0422406	0.565634	0.0764187	0.00713018	0.182498	0.0580913	0.862523	0.326463	0.349273	0.0421828
Rbms3	0.184875	0.00316956	1	0.201083	0.00474067	0.017484	0.406061	0.0974599	0.0232226	0.0375907	0.00674448	0.89295	0.560466	0.333132	0.036306
Nupr1.1	1	0.00375977	0.267534	0.0158948	0.00498868	0.00565727	0.0310339	0.0276334	0.0154662	0.0228159	0.0217668	0.0397851	0.377328	0.0537852	0.00485437
Ppl	0.017576	0.0339901	1	0.107496	0.0530307	0.078326	0.565655	0.214371	0.0984486	0.0254546	0.0147545	0.0282298	0.882064	0.421051	0.0772623
Cdh6	0.00625642	0.0262486	0.399261	0.0407888	0.0168711	0.00737533	0.00516578	0.00375543	0.00279743	0.00683354	0.00143264	0.0112587	0.00233132	1	0.0316707
Akr1b3	0.0821269	0.0182365	0.532935	0.0248604	0.01835	0.0234385	0.29439	0.0277391	0.0186035	0.0958074	0.0418931	0.0443794	1	0.0317927	0.0249328
Rasl11b	0.0477017	0.0660125	1	0.0597432	0.0174657	0.0452607	0.25192	0.00694321	0.0159145	0.035026	0.0217333	0.234441	0.163043	0.621478	0.051693
Parm1	0.012028	0.00942224	0.60786	0.0114117	0.00296975	0.0619096	0.138357	1	0.760001	0.0147843	0.00588063	0.0381522	0.445799	0.120446	0.024721
Ifit3b	0.240823	0.05805	1	0.0782888	0.0430415	0.0311723	0.201496	0.0328887	0.0620784	0.131606	0.0501663	0.0748107	0.144436	0.109941	0.0312846
Wnt7b	0.0112898	0.00843651	1	0.204697	0.00929114	0.018439	0.700082	0.0464188	0.0114635	0.0286381	0.0136222	0.0156581	0.589236	0.0901137	0.051521
Sptb	0.24589	0.0460636	1	0.0617453	0.0577094	0.120625	0.197096	0.278633	0.328618	0.0384803	0.0310877	0.0764653	0.0793505	0.108631	0.247778
Akap12	0.0214471	0.0133642	0.335158	0.011549	0.00888843	0.013288	0.0341425	0.00818996	0.00624849	0.0867732	0.00791968	0.108995	0.0270871	1	0.00866358
Phgdh	0.158643	0.0561951	1	0.0344982	0.0316269	0.0356871	0.0936451	0.0316421	0.0303783	0.052678	0.152139	0.0865823	0.328361	0.606923	0.0580413
Cryab	0.152635	0.0438367	1	0.0491991	0.0294464	0.0570844	0.335963	0.0758268	0.0378483	0.119933	0.0499414	0.124843	0.362669	0.117491	0.039706
Apela	0.00709001	0.0167327	1	0.091877	0.00992257	0.10854	0.780691	0.0285142	0.0179607	0.0191264	0.0200711	0.0269906	0.0799845	0.0631999	0.068652
Scel	0.195602	0.00727205	1	0.259308	0.00234491	0.00795782	0.0871756	0.0312455	0.0405701	0.0128126	0.00388678	0.00579813	0.0325972	0.201438	0.0177285
Pgm5	0.0211967	0.0434771	1	0.0168208	0.0863382	0.118038	0.0173954	0.682003	0.0327807	0.169462	0.00903772	0.0938725	0.00310311	0.482251	0.027408
Epha7	0.0221615	0.0809873	1	0.0130801	0.00950896	0.00860045	0.0146533	0.0132779	0.0124021	0.0136341	0.00641494	0.162441	0.0268472	0.358954	0.0123761
D030045P18Rik	0.00256664	0.0582434	1	0.0459283	0.00390035	0.0038318	0.115236	0.00322851	0.00900079	0.0568468	0.00105988	0.0193065	0.00281611	0.0267159	0.00780752
Tshz2	0.320169	0.00259648	1	0.00287984	0.00296312	0.00305928	0.00802838	0.00386037	0.00761593	0.426462	0.00938504	0.734417	0.0526147	0.679125	0.00263148
Fam78b	1	0.0164328	0.981267	0.0101614	0.0211322	0.0158816	0.00982557	0.0069812	0.0422954	0.103171	0.0726954	0.217705	0.00286393	0.17085	0.00342472
Gm26883	0.28183	0.0018805	1	0.00221772	0.00181313	0.00288794	0.00624339	0.000305421	0.0090471	0.387064	0.0070397	0.675131	0.034213	0.677138	0.000242609
Slc4a11	0.00984883	0.04137	1	0.026269	0.00560685	0.011018	0.06077	0.0271749	0.0122116	0.0432002	0.0129914	0.0487774	0.0317164	0.043546	0.0184345
Rtn1	0.0161809	0.00957076	1	0.0163659	0.0351826	0.0365642	0.0939722	0.00788463	0.0143542	0.024066	0.123162	0.120911	0.0318154	0.247205	0.0240493
Slc14a2	0.00107838	0.0201658	1	0.00596003	0.00172931	0.0104816	0.465299	0.00629285	0.00131577	0.00526923	0.00219317	0.00467869	0.0426288	0	0.00302633
Cdh13	0.00432302	0.00964342	1	0.0111258	0.00868736	0.0118152	0.015405	0.00471412	0.0129351	0.302047	0.00738649	0.135769	0.664364	0.00873373	0.0049285
Bst1	0.0045056	0.00882726	1	0.00645151	0.00526328	0.00805349	0.0061996	0.0116239	0.0114663	0.132153	0.156669	0.018267	0.0145776	0.128147	0.00359557
Proser2	0.0116715	0.00685672	1	0.0524856	0.00892638	0.010081	0.0423691	0.0277094	0.000372271	0.00935973	0.00333769	0.00721865	0.162701	0.294561	0.00876401
Sorcs3	0.00668868	0.00819425	1	0.014712	0.00670591	0.0119632	0.00803481	0.013221	0.110675	0.011325	0.0032572	0.00524055	0.0072512	0.428208	0.00825639
Zan	0.0113809	0.00345438	1	0.00628367	0.00276932	0.00594909	0.0626927	0.0203292	0.00219697	0.00510634	0.0589464	0.0118073	0.208153	0.0128524	0.0133783
Fst	0.000815467	0.00345335	1	0.0033768	0.00093626	0.00217653	0.00238225	0.00316492	0.0101352	0.00591667	0.00549142	0.0192151	0.0167682	0.0276163	0.00492722
Fam43a	0.0459456	0.0468332	0.309619	0.766323	0.0365142	0.0296691	0.047353	0.0499789	0.0280381	1	0.110708	0.122682	0.0748759	0.162188	0.133869
Slc16a7	0.0165422	0.00972874	0.0769591	0.863709	1	0.457176	0.152845	0.419099	0.544639	0.035945	0.0558151	0.0356673	0.110388	0.102432	0.363534
Slit2	0.0278713	0.00538257	0.0143902	1	0.873963	0.823053	0.108681	0.518699	0.935931	0.0288906	0.00640927	0.15799	0.0246306	0.144875	0.966136
Efna5	0.0905211	0.0124587	0.288054	0.973563	0.714182	0.540424	0.66615	0.115004	0.154515	0.081142	0.00824956	0.0863502	0.643215	0.227425	1
Map2	0.0163491	0.0131648	0.596034	0.853248	0.251685	0.30018	0.73326	0.188858	0.274725	0.0517038	0.0789479	0.113069	0.156203	0.327	1
Lnx1	0.0321427	0.0137934	0.0421499	0.92769	1	0.49494	0.208459	0.447404	0.377732	0.0423153	0.0167965	0.0416397	0.189068	0.0199681	0.736429
Gm13832	0.0473992	0.00566584	0.112657	0.94408	1	0.509798	0.105381	0.532299	0.349155	0.0159084	0.106471	0.0752682	0.00357712	0.0414878	0.69966
Kng2	0.0245452	0.0632437	0.0271812	1	0.943613	0.436661	0.0377226	0.0692953	0.0925941	0.0420513	0.0188436	0.0356332	0.0237701	0.0227431	0.569646
Wfdc15b	0.15705	0.0834386	0.130759	1	0.407764	0.144962	0.223283	0.156573	0.109153	0.166828	0.100329	0.155132	0.123099	0.0813388	0.351859
Smarcd3	0.117591	0.0819246	0.174327	1	0.313179	0.227411	0.141269	0.185944	0.153121	0.0901814	0.0368313	0.397656	0.0937015	0.276308	0.435895
Plekhg1	1	0.00195454	0.0287429	0.337973	0.102382	0.0190848	0.0195903	0.00625609	0.0115994	0.35237	0.0158379	0.143318	0.0483629	0.0283849	0.0985317
Tmem72	0.0304332	0.0155941	0.0404233	0.92209	1	0.451516	0.0314513	0.180402	0.555888	0.0394242	0.0192012	0.0366418	0.0222369	0.00547353	0.630017
Thsd4	0.0566476	0.0303141	0.0352993	1	0.020878	0.0195269	0.541551	0.117031	0.0809138	0.746447	0.01077	0.798931	0.884565	0.170055	0.856656
Myo3b	0.0198259	0.0102078	0.621001	1	0.501291	0.552149	0.282722	0.850064	0.167987	0.0368517	0.0618414	0.0313132	0.0829326	0.0580187	0.476211
Irx2	0.0987119	0.0974676	0.945418	1	0.0329862	0.0349113	0.0522093	0.0611382	0.0407831	0.0772971	0.0380393	0.0446481	0.077802	0	0.551731
Bckdhb	0.0810557	0.0913181	0.0530505	1	0.390641	0.212639	0.0951654	0.131184	0.106476	0.0581685	0.0348071	0.0666092	0.0675913	0.105857	0.290262
Fndc9	0.0317953	0.0581043	0.252726	1	0.417654	0.238709	0.231017	0.0824075	0.115299	0.0296558	0.187386	0.0266397	0.0442699	0.0906201	0.296031
Clcnka	0.0466169	0.0481327	0.696456	1	0.378412	0.279978	0.0706646	0.566191	0.184435	0.0701744	0.0495174	0.0848429	0.0509082	0.0376115	0.365733
Rasgrp1	0.0424398	0.0132661	0.0186759	1	0.320598	0.0592621	0.0636343	0.0695543	0.187444	0.0873534	0.743112	0.0698239	0.0334398	0.0102625	0.339924
Tfap2b	0.0290281	0.00993089	0.197322	1	0.911369	0.624543	0.213371	0.0465287	0.0977327	0.0470489	0.0230908	0.0347239	0.0161916	0.028127	0.770663
AC153364.1	0.024722	0.0162666	0.395961	1	0.431357	0.533633	0.298408	0.19997	0.455412	0.227383	0.00555401	0.0250196	0.876592	0.149455	0.48364
Fads6	0.00833759	0.0131603	0.0193656	0.892162	1	0.447351	0.0336966	0.0100542	0.0597533	0.0352624	0.0303965	0.0416496	0.0151454	0.0215594	0.532618
Slc6a17	0.0183314	0.104726	0.370595	1	0.0883364	0.0323525	0.1027	0.100595	0.0389496	0.0559418	0.0167222	0.0809893	0.0779195	0.290179	0.453584
Stk32b	0.0179409	0.0145277	0.279341	0.830987	1	0.119731	0.0454144	0.0255344	0.0368743	0.02468	0.00525302	0.0198161	0.0170879	0.0104682	0.324453
Rgs7	0.0138672	0.124637	0.129269	1	0.0239019	0.0215247	0.040376	0.0267187	0.0157264	0.0345342	0.00765692	0.186304	0.0677823	0.0101085	0.0301849
Umod	0.109855	0.0673859	0.109922	1	0.206946	0.0837815	0.0877258	0.0883646	0.100998	0.134831	0.138549	0.135344	0.0863928	0.0843388	0.346028
Gpc5	0.00509682	0.0207506	0.106882	0.672917	0.0161823	0.352426	0.515488	0.0234114	0.0613209	0.0264839	0.00890835	0.0215579	1	0.0316084	0.236093
Zfpm2	0.0134516	0.00518964	0.0112246	0.537436	0.007282	0.0120664	0.100769	0.00859406	0.00972553	0.151456	0.00504462	1	0.0219346	0.171471	0.290438
Cacnb4	0.0137621	0.0230147	0.0669226	1	0.721033	0.410648	0.139264	0.0165477	0.0179119	0.0329625	0.00576766	0.0340477	0.0241944	0.178896	0.573601
Gm13075	0.0163981	0.00802293	0.333516	1	0.755427	0.305613	0.0399391	0.571624	0.297171	0.0211922	0.00174679	0.0224644	0.0283883	0.00800204	0.382116
Adcy1	1	0.0146154	0.0148026	0.431104	0.0914317	0.105874	0.0138313	0.0667838	0.0581019	0.0219551	0.0111052	0.0263344	0.011754	0.0198611	0.256711
AC144408.3	0.179243	0.0316303	0.417267	1	0.36822	0.166635	0.235847	0.104727	0.150264	0.0797933	0.0249882	0.130645	0.140702	0.0536038	0.385305
X4930426D05Rik	0.0316164	0.0352204	0.409999	1	0.0557562	0.191925	0.48758	0.110007	0.0671005	0.0294984	0.032905	0.0535628	0.0994975	0.938518	0.359736
Abca4	0.0688013	0.074721	0.169923	1	0.119285	0.0378895	0.0286092	0.0715376	0.0230211	0.122791	0.0145242	0.0369443	0.0581957	0.191937	0.271889
Klhl14	0.0119186	0.0345054	0.503788	1	0.0820074	0.16665	0.335003	0.0529485	0.0367474	0.0238779	0.0127861	0.0323021	0.0791885	0.686449	0.600831
Ralyl	0.0255546	0.0267753	0.035656	1	0.0395902	0.0390925	0.966469	0.0333129	0.0468198	0.0481887	0.110263	0.0530979	0.0274557	0.0287786	0.279308
Pla1a	0.0261446	0.0585216	0.0886576	1	0.105108	0.0453554	0.0328091	0.0151092	0.0198024	0.0685247	0.0494661	0.331807	0.0551955	0.158008	0.275786
Ppp1r1a	0.0505128	0.0258867	0.152814	1	0.524971	0.17852	0.0425217	0.049212	0.0393802	0.0681182	0.0416148	0.0474139	0.0437206	0.0151035	0.290741
Pak6	0.0387961	0.0166615	0.0992898	1	0.24853	0.275385	0.25177	0.260613	0.297771	0.0363437	0.0437584	0.0273504	0.491676	0.00609519	0.435307
Kctd8	0.0292514	0.0108912	0.0108976	0.864916	0.100255	0.0467518	0.513062	1	0.0207869	0.0330925	0.00786568	0.0555982	0.0255028	0.260138	0.432854
Esrrb	0.0189747	0.0203989	0.0979348	1	0.688681	0.187701	0.0243743	0.0640094	0.0939051	0.0240815	0.00453754	0.0219506	0.00822204	0.0204621	0.363227
Lrrc31	0.00645119	0.00228676	0.160233	0.651414	0.173562	0.0206782	0.172106	1	0.0720399	0.0138524	0.00346631	0.0121118	0.161097	0	0.250284
Cldn19	0.037023	0.0367061	0.483356	1	0.103852	0.0486509	0.0851559	0.0377214	0.0757536	0.0859114	0.0810867	0.094522	0.05771	0.107823	0.315358
Chst9.1	0.0217113	0.0097503	0.967108	0.891133	0.0119292	0.0230966	0.375809	0.0107768	0.0188391	0.0246812	0.00309576	0.0222659	0.336201	1	0.33037
Ano4	0.0244595	0.0623078	0.0273771	1	0.0155279	0.0133271	0.0226966	0.0262182	0.0198919	0.0377609	0.0065678	0.484964	0.0133131	0.0103544	0.133038
Lrrc66	0.0168359	0.00693611	0.0304717	1	0.57566	0.290961	0.0206127	0.283933	0.0794178	0.0358026	0.0072018	0.0259506	0.00786337	0.0207575	0.292194
Prox1	0.0432872	0.00791399	0.459766	1	0.568195	0.0250845	0.0131571	0.0127839	0.0232649	0.101627	0.0117608	0.0239582	0.00864418	0.0168401	0.211279
X4732465J04Rik	0.0154993	0.0266752	0.01822	1	0.289116	0.202066	0.0483357	0.00633655	0.0944435	0.0263453	0.0134354	0.0219544	0	0.0164596	0.369898
Egf	0.169532	0.0127664	0.0188234	1	0.558957	0.042858	0.0149986	0.0114089	0.0251152	0.0273572	0.00626853	0.0198381	0.00510798	0.0151284	0.294505
Rps6ka6	0.0380441	0.0358953	0.0991528	1	0.11055	0.0172233	0.0308252	0.0156931	0.0379504	0.0426281	0.0116225	0.0434204	0.129799	0.0441375	0.629523
Kcnn2	0.0448786	0.0179665	0.0253808	1	0.377903	0.0740357	0.0174097	0.0168424	0.0391228	0.0307309	0.00872607	0.0384574	0.00451647	0.0227413	0.360578
Slc2a13	0.00698407	0.0156101	0.0226269	1	0.0733625	0.032119	0.078762	0.0186975	0.0282022	0.185719	0.0123647	0.304816	0.00437763	0.0768655	0.411283
Casr	0.0247277	0.00319156	0.00631365	1	0.290094	0.150267	0.0329326	0.0465139	0.515545	0.0257043	0.00578774	0.017821	0.0160461	0	0.490711
Erbb4	0.0397889	0.0135542	0.095017	1	0.284955	0.0249637	0.0525595	0.0226117	0.014587	0.0264181	0.0030582	0.0191155	0.0178317	0.0584998	0.505424
Ephb2	0.0155701	0.00422947	0.278473	1	0.0913738	0.143456	0.10142	0.179142	0.0433854	0.0247082	0.00947972	0.0442083	0.357919	0.0120966	0.339616
Fa2h	0.430254	0.00712708	0.297897	1	0.0328414	0.0204427	0.0865781	0.12543	0.190421	0.0238288	0.00477733	0.0172618	0.275637	0.0356077	0.292387
Gp2	0.00670423	0.00463936	0.066827	1	0.325758	0.019021	0.00988268	0.0183128	0.0919246	0.033705	0.00753891	0.0157085	0.0106385	0.020396	0.326335
Sim2	0.0136148	0.010789	0.432508	1	0.0157859	0.0160572	0.024269	0.0129217	0.0112939	0.0318371	0.0197635	0.0314499	0.0335473	0.0079825	0.206047
Ptger3	0.0198073	0.00955894	0.0370001	1	0.0839496	0.0253308	0.0200123	0.175892	0.314756	0.035703	0.0112352	0.0285903	0.0420883	0.00950638	0.184259
Tenm2	0.0576839	0.0215431	0.0296335	1	0.0265457	0.0113203	0.014372	0.0266821	0.0182223	0.0258234	0.00513492	0.0346161	0.0390192	0.303807	0.212124
Gm44588	0.011396	0.00873294	0.0331179	1	0.148692	0.0287416	0.0210621	0.0165992	0.0458534	0.0437831	0.0144714	0.0354723	0.00650118	0	0.27992
Arsj	0.0246592	0.00419919	0.0148804	1	0.0464739	0.015356	0.0201646	0.00477616	0.00731509	0.0206914	0.00398203	0.364874	0.0127771	0.0662464	0.419271
Egfl6	0.0180972	0.0108256	0.077783	1	0.0582098	0.0185094	0.0728529	0.0224679	0.0157292	0.037354	0.0207033	0.0234892	0.158553	0.0684482	0.228477
Enox1	0.0233512	0.00808099	0.00936138	1	0.0148954	0.0227996	0.0160177	0.0329528	0.0354898	0.0332973	0.00748481	0.0555285	0.0278301	0.0161429	0.749757
Pcsk6	0.483295	0.00242171	0.0359462	1	0.00873296	0.00910228	0.0198018	0.00501695	0.00963024	0.0357201	0.00269634	0.0229751	0	0.113252	0.166228
Sgcz	0.0205711	0.0072255	0.0726933	1	0.016179	0.0162208	0.0129351	0.0154419	0.0219413	0.0274335	0.00936301	0.0234405	0.00637337	0.00726383	0.0465582
Kcnt1	0.0224803	0.00715305	0.0076465	1	0.0216071	0.0165748	0.0152218	0.0162362	0.00544806	0.0387908	0.00386518	0.0229333	0.0211791	0.0171395	0.128886
Slc12a1	0.0203866	0.00506249	0.0122678	1	0.00973776	0.0152802	0.0177406	0.0106655	0.0160789	0.0269341	0.00745742	0.0216626	0.0116082	0.0109535	0.241775
Tmem207	0.0160837	0.00458619	0.0132162	1	0.00605206	0.011282	0.0113262	0.00517697	0.0138632	0.0287342	0.00561338	0.0264657	0.0107424	0.0132216	0.0938923
Gm14002	0.0159193	0.00156122	0.01077	1	0.00654747	0.0105548	0.0110191	0.010852	0.00324452	0.0116514	0.000507627	0.0126311	0.00226766	0.00857685	0.222746
X4933406I18Rik	0.158059	0.0288841	0.0214903	0.0132255	0.491403	1	0.726474	0.102741	0.184993	0.0191663	0.179019	0.0708167	0.181031	0.323137	0.488838
Sgpp2	0.0205692	0.00908441	0.0479033	0.547168	0.886137	0.787189	0.653746	1	0.831318	0.02567	0.0102163	0.0230581	0.0375096	0.0776617	0.891839
Maml3	1	0.0273605	0.145113	0.217966	0.595043	0.422126	0.181065	0.16703	0.33981	0.242233	0.166156	0.278654	0.16472	0.44958	0.351212
Sorbs2	0.0199979	0.0245536	0.252118	0.475722	1	0.888314	0.834334	0.461465	0.31052	0.299579	0.0115103	0.707471	0.527023	0.388324	0.804205
Tmem72.1	0.0304332	0.0155941	0.0404233	0.92209	1	0.451516	0.0314513	0.180402	0.555888	0.0394242	0.0192012	0.0366418	0.0222369	0.00547353	0.630017
Scnn1a	0.0341173	0.0459393	0.0926496	0.425425	0.92869	1	0.585909	0.867153	0.809858	0.0440149	0.0510977	0.0577865	0.250876	0.0231686	0.456184
Kcnq1	0.149607	0.0537076	0.101475	0.227687	0.741621	0.684057	0.621385	1	0.677404	0.064732	0.0405098	0.0619899	0.197855	0.0587997	0.524178
Slc16a7.1	0.0165422	0.00972874	0.0769591	0.863709	1	0.457176	0.152845	0.419099	0.544639	0.035945	0.0558151	0.0356673	0.110388	0.102432	0.363534
Exph5	0.0219652	0.0532139	0.48146	0.189355	0.713778	0.622904	0.496873	1	0.851991	0.0209669	0.0113571	0.0367067	0.0749188	0.162757	0.582551
Pip5k1b	0.0988479	0.199082	0.0758561	0.0851387	1	0.814581	0.0768947	0.250864	0.636627	0.239579	0.0739755	0.258837	0.0969965	0.153633	0.559275
Trpm7	0.0923577	0.241206	0.109139	0.145862	1	0.17491	0.0917898	0.199995	0.190802	0.133986	0.090095	0.115102	0.0808747	0.100671	0.419246
Mecom	0.0161936	0.00292481	0.0833795	0.704713	1	0.604044	0.542677	0.59161	0.507767	0.0896089	0.00436348	0.112722	0.294697	0.00338418	0.811342
Ipcef1	0.0252677	0.00700008	0.0257758	0.201758	0.96121	0.939437	0.360808	0.669834	1	0.0491878	0.923072	0.0828358	0.136678	0.0272587	0.617648
Fads6.1	0.00833759	0.0131603	0.0193656	0.892162	1	0.447351	0.0336966	0.0100542	0.0597533	0.0352624	0.0303965	0.0416496	0.0151454	0.0215594	0.532618
Cnnm2	0.0696045	0.173756	0.150143	0.235524	1	0.74186	0.137428	0.135759	0.191545	0.0671455	0.0393158	0.109359	0.0824908	0.0903774	0.46814
Acss1	0.0282761	0.119256	0.0275806	0.306166	1	0.892391	0.101228	0.957002	0.557393	0.0483641	0.0538421	0.032488	0.0404006	0.0162195	0.346616
Phactr1	0.0153322	0.0109468	0.012569	0.0110617	0.364737	1	0.485221	0.0289015	0.171674	0.0289452	0.00189137	0.0839061	0.0200274	0.0396941	0.27543
Tsc22d1	0.373012	0.124833	0.249351	0.225494	1	0.87421	0.233675	0.142421	0.19502	0.151866	0.105389	0.125629	0.136868	0.731027	0.36799
Malrd1	0.011024	0.00589247	0.00401619	0.00778717	0.178206	0.1604	0.00580772	0.499305	1	0.00384875	0.00435034	0.00640092	0.00988733	0.0112654	0.0634096
Dach1	1	0.0561108	0.008327	0.16583	0.569194	0.524049	0.0717008	0.137556	0.296521	0.0130321	0.0029607	0.126693	0.00756424	0.0537951	0.393572
Sgms2	0.018401	0.169861	0.100466	0.193643	1	0.892328	0.0755176	0.0912513	0.109293	0.0442781	0.0207827	0.0476866	0.0868678	0.131576	0.326388
Clcnkb	0.0344813	0.0252208	0.0484033	0.347337	0.84089	0.837088	0.137959	1	0.956629	0.0511359	0.0371128	0.0460373	0.0174354	0.0354266	0.311648
Kctd1	0.0195995	0.0264973	0.0798739	0.654836	1	0.532902	0.129351	0.138916	0.173226	0.033725	0.0234854	0.0494283	0.117782	0.140789	0.836869
Stk32b.1	0.0179409	0.0145277	0.279341	0.830987	1	0.119731	0.0454144	0.0255344	0.0368743	0.02468	0.00525302	0.0198161	0.0170879	0.0104682	0.324453
Gm26688	0.0106934	0.00366211	0.0153958	0.0368388	0.443174	0.494944	1	0.449486	0.361917	0.00767807	0.00789245	0.017653	0.284148	0.00563222	0.522371
Gm26542	0.0412631	0.0917257	0.107568	0.20731	1	0.848939	0.233551	0.351627	0.38921	0.126546	0.0746478	0.147556	0.114759	0.112277	0.923306
Mgll	0.0721092	0.108463	0.0274225	0.199258	1	0.311313	0.494526	0.393705	0.153494	0.532607	0.0194866	0.189725	0.0152996	0.0798784	0.463277
Ank2	0.0389835	0.0125427	0.402055	0.410611	0.957282	0.162472	0.0266488	0.0475415	0.044286	0.0351635	0.581331	0.158117	0.031444	1	0.431609
Kcnj10	0.0313439	0.0157455	0.0223301	0.25295	0.750254	1	0.3488	0.059385	0.0881021	0.0290604	0.116288	0.0320091	0.0277971	0.0195459	0.510459
Cdh3	0.0130989	0.0130396	0.120615	0.419451	0.843996	0.512778	0.322709	0.0216798	0.0371086	0.0314919	0.0129422	0.0530918	0.347314	0.23748	1
Slc4a3	0.0342896	0.0493933	0.117045	0.295539	1	0.902012	0.228319	0.558367	0.586784	0.0282011	0.0120235	0.184906	0.0801318	0.184984	0.683158
Cavin2	0.0364149	0.0436854	0.0149213	0.0656917	0.683157	0.535402	0.0875379	0.0552803	0.0976804	1	0.0275311	0.0822066	0.0306225	0.0765219	0.269015
Ppp2r2b	0.01972	0.0178028	0.203196	0.399287	0.797678	0.282739	0.1435	0.26058	0.213567	0.0139311	0.00207756	0.0194064	0.165184	1	0.316458
Wnk1	0.10417	0.0989487	0.113192	0.141455	1	0.681585	0.0712488	0.164325	0.155732	0.184529	0.208632	0.13507	0.0921082	0.137762	0.287072
Lhx1os	0.0287602	0.20757	0.0156236	0.0146758	1	0.228879	0.0752567	0.0845943	0.122498	0.0313902	0.0109869	0.0213179	0	0.055176	0.336442
Tfap2a	0.0149331	0.00382195	0.0052898	0.0413662	0.589227	0.596332	1	0.502655	0.478072	0.00938063	0.00380761	0.0134497	0.218094	0.00468791	0.597665
Sfrp1	0.0321412	0.02334	0.0267389	0.414032	1	0.595802	0.0349727	0.0735274	0.0439144	0.0557858	0.0452799	0.521601	0.0329692	0.0417274	0.601436
Plekhd1	0.00513013	0.00350092	0.0535473	0.10792	0.489399	0.354563	0.0714913	0.797362	1	0.00750999	0.00672946	0.00800372	0.0122489	0.0151228	0.316163
Ltc4s	0.0191154	0.0167531	0.0217418	0.0318841	0.545951	1	0.0779766	0.0622046	0.164712	0.255145	0.0564842	0.0819077	0.0523539	0.0216813	0.193622
Prkd1	0.24395	0.00578129	0.188606	0.479493	1	0.451461	0.127326	0.026918	0.0136929	0.299236	0.00333703	0.175189	0.0150777	0.127445	0.456395
Cdk14	0.0455121	0.00882002	0.0466112	0.0232186	1	0.807409	0.693694	0.0149115	0.0697989	0.0451616	0.687986	0.348746	0.470331	0.176647	0.667771
Nrxn3	0.010654	0.0516945	0.00740992	0.493723	1	0.0257709	0.0154497	0.0420359	0.0184584	0.0224603	0.00523225	0.105416	0.00898725	0.0206898	0.61584
Syt17	0.24311	0.00502147	0.0240489	0.528103	1	0.551913	0.056368	0.0165951	0.0546277	0.0206871	0.0042726	0.0277979	0.0206724	0.0665558	0.570931
Grb14	0.0164569	0.0409774	0.0650351	0.203123	1	0.769055	0.601465	0.412214	0.32289	0.0252049	0.00551073	0.0939713	0.0577451	0.202343	0.604311
Med12l	1	0.0190586	0.00995732	0.151939	0.81515	0.202141	0.140809	0.476691	0.0802716	0.0162126	0.335078	0.0920215	0.146358	0.379237	0.613552
Nsun7	0.0146527	0.0218091	0.0243994	0.343965	1	0.732049	0.128757	0.369997	0.215568	0.0771442	0.0054179	0.0728095	0.0750395	0.115526	0.669322
Uroc1	0.034889	0.178144	0.0153214	0.0388025	1	0.160911	0.0173721	0.047749	0.0194713	0.0246575	0.0137258	0.0264883	0.00590238	0.030497	0.266532
Cadps2	0.0104061	0.0697532	0.141935	0.152798	1	0.458134	0.13419	0.195517	0.289965	0.0586517	0.0062759	0.137122	0.148805	0.538051	0.467024
Acss3	0.0228203	0.0812443	0.0754031	0.156128	1	0.525187	0.093013	0.0432484	0.114879	0.0127341	0.00476843	0.058837	0.00330128	0.417627	0.366035
Fam124a	0.00765786	0.0189168	0.214119	0.41363	1	0.0885833	0.0354738	0.0180984	0.0101328	0.0698481	0.0214929	0.0496342	0.0496541	0.0148447	0.726795
Emx1	0.0246349	0.100652	0.016934	0.0147149	1	0.878973	0.106405	0.0318497	0.0524713	0.0228326	0.0197631	0.0252297	0.0073648	0.0621799	0.449422
Abca13	0.00551887	0.00374529	0.00698254	0.421343	1	0.294444	0.0155046	0.0116258	0.0212709	0.014872	0.00483359	0.0171403	0.00910264	0.00362555	0.416776
Tmem52b	0.0120996	0.0174631	0.0255331	0.141693	0.927217	1	0.10754	0.0922129	0.187665	0.0304767	0.0254544	0.0246926	0.0148268	0.0152929	0.487474
Adamts16	0.0889794	0.0110816	0.00521317	0.0900737	0.834171	1	0.235013	0.0856984	0.0627019	0.0568342	0.00191831	0.00917012	0	0.610199	0.371277
Efhc2	0.0192282	0.0691723	0.0366048	0.0576458	1	0.503154	0.155239	0.0509176	0.0534519	0.124524	0.00967151	0.0667471	0.0182099	0.0940595	0.409757
Lhx1	0.00564471	0.0979419	0.0123488	0.0076577	1	0.285348	0.11992	0.072275	0.13127	0.0184585	0.00848047	0.0246155	0	0.0341753	0.352566
Klhl3	0.0326709	0.0560707	0.0147976	0.0761682	1	0.616395	0.0560049	0.082646	0.192802	0.0268989	0.00709293	0.0270959	0.0126214	0.0294952	0.238332
Fgf13	0.00180984	0.0138317	0.0181211	0.00944849	1	0.0667729	0.0140767	0.0299254	0.0384281	0.0551828	0.661917	0.0475898	0.00872389	0.00981168	0.398349
Col5a2	0.00859583	0.00555633	0.00469864	0.221595	1	0.0167759	0.00940076	0.0156218	0.0148433	0.0332433	0.0144801	0.661513	0.0139059	0.00451338	0.446631
Cables1	0.375682	0.0155754	0.0118357	0.110287	1	0.324767	0.107907	0.0215105	0.00674853	0.220977	0.0279334	0.18747	0.0580008	0.0571816	0.261535
Gm21154	0.002548	0.0198278	0.00946442	0.120779	1	0.616538	0.018334	0.0445055	0.080002	0.0228274	0.0132527	0.0196467	0	0.0561539	0.423839
Tox3	0.0060562	0.0025528	0.0252437	0.0663202	1	0.787168	0.235245	0.140793	0.415169	0.00853173	0.00243296	0.0174462	0.130435	0.0322863	0.53313
Aff2	0.017878	0.0246516	0.0220965	0.125851	1	0.23022	0.0295182	0.0283007	0.0478751	0.011594	0.0103902	0.0364295	0.0133079	0.132479	0.684837
Hmgcll1	0.0127401	0.00408504	0.0202925	0.191358	1	0.108351	0.00929795	0.0179247	0.0495252	0.0145702	0.00453847	0.0156822	0.248718	0.0462708	0.672074
Cwh43	0.0120199	0.00506993	0.0041954	0.100066	1	0.34546	0.0149083	0.0513694	0.0284138	0.00964959	0.0111609	0.014934	0.0308675	0.0125654	0.310346
Pvalb	0.00891561	0.0238368	0.0242386	0.0374006	1	0.177923	0.028021	0.0475274	0.0541862	0.0533303	0.0199307	0.035191	0.0134408	0.0183558	0.187324
Trpm6	0.00246915	0.00942542	0.0529649	0.0319012	1	0.431201	0.0268202	0.0300375	0.0424967	0.00697485	0.00368376	0.00668813	0.0204252	0.35069	0.190709
Ptgfr	0.0165061	0.00603336	0.0177619	0.0581092	1	0.182773	0.135396	0.0342238	0.104975	0.0111816	0.00831332	0.0169776	0.0116675	0.0121548	0.447899
Sall3	0.00659454	0.00239797	0.0151409	0.0339227	1	0.423645	0.00817817	0.027394	0.103091	0.00631486	0.00208938	0.0115008	0.00970077	0.0113053	0.557066
Slc12a3	0.00285646	0.00228399	0.00358612	0.0027777	1	0.287712	0.00545857	0.00716642	0.00472542	0.00644693	0.00230584	0.00730452	0.00325185	0.00210361	0.188252
Gm13256	0.024902	0.00408247	0.0068029	0.00562408	0.1266	0.301485	0.90264	0.294541	0.158264	0.0190821	0.0458157	0.0252042	1	0.00324123	0.107101
Pde10a	0.664683	0.00728968	0.0128945	0.178422	0.390021	0.584572	1	0.0118573	0.0500393	0.135172	0.0123418	0.0980253	0.0132877	0.0325223	0.234635
Tmem45b	0.00781263	0.0397075	0.054161	0.0195233	0.06285	0.384966	1	0.0845923	0.0269863	0.0112924	0.0071179	0.00907245	0.420599	0.00799799	0.124305
Stk32a	0.0129716	0.0838439	1	0.0735563	0.0753342	0.555956	0.0206375	0.050071	0.114566	0.0278368	0.00323313	0.0251272	0	0.0440604	0.268627
Ier3	0.272474	0.0596017	0.127719	0.331265	0.474489	1	0.603676	0.145184	0.146872	0.16157	0.111119	0.162188	0.290816	0.16856	0.399486
Hoxd9	0.0890245	0.0393071	0.138855	0.331407	0.584513	1	0.721422	0.295846	0.292923	0.0836127	0.0525814	0.295763	0.373351	0.237034	0.601831
Klhl3.1	0.0326709	0.0560707	0.0147976	0.0761682	1	0.616395	0.0560049	0.082646	0.192802	0.0268989	0.00709293	0.0270959	0.0126214	0.0294952	0.238332
L1cam	0.0218569	0.0081864	0.370253	0.161778	0.0597351	0.532351	1	0.148025	0.03063	0.0333281	0.0572618	0.0249047	0.32359	0.155157	0.157788
Slc35g1	0.0137376	0.0178606	0.294826	0.193334	0.499104	0.870123	1	0.981964	0.244838	0.0336932	0.106655	0.039069	0.941512	0.0868564	0.367442
Gm26688.1	0.0106934	0.00366211	0.0153958	0.0368388	0.443174	0.494944	1	0.449486	0.361917	0.00767807	0.00789245	0.017653	0.284148	0.00563222	0.522371
Megf9	0.305715	0.0400144	0.362154	0.247826	0.316659	0.996343	1	0.484283	0.281828	0.114939	0.0955448	0.194351	0.468164	0.142931	0.588059
Krt7	0.0941616	0.0101282	0.134668	0.108182	0.095353	0.383595	0.483549	0.14264	0.186298	0.0240035	0.0236054	0.0208729	1	0.0550891	0.1146
Tbx2	0.0552876	0.151663	0.0235534	0.0228192	0.107891	1	0.695786	0.461504	0.484842	0.112873	0.0350217	0.554975	0.613534	0.189886	0.279165
Slc29a1	0.361201	0.0329836	0.0683951	0.158123	0.519514	1	0.209678	0.141369	0.144073	0.515496	0.383202	0.622881	0.132236	0.416114	0.498241
Gata3	0.0132143	0.00326088	0.00495512	0.00507	0.253299	0.38831	0.810813	0.382786	0.268052	0.014436	0.0509791	0.037228	1	0.00200871	0.195589
St6gal1	1	0.0105123	0.201979	0.00760724	0.00768215	0.358	0.30346	0.0689366	0.231542	0.111826	0.102745	0.134299	0.198362	0.612798	0.112843
Tfap2a.1	0.0149331	0.00382195	0.0052898	0.0413662	0.589227	0.596332	1	0.502655	0.478072	0.00938063	0.00380761	0.0134497	0.218094	0.00468791	0.597665
Lamc2	0.0209144	0.0306746	0.460682	0.223732	0.216351	0.765499	0.477657	0.272168	0.352182	0.0498793	0.0254662	0.0313802	1	0.272777	0.299802
Tspan1	0.0117118	0.0135418	0.0280132	0.0849693	0.0554392	0.440075	1	0.107729	0.161874	0.0238588	0.0135381	0.0320428	0.244797	0.00944291	0.0872966
Trpm6.1	0.00246915	0.00942542	0.0529649	0.0319012	1	0.431201	0.0268202	0.0300375	0.0424967	0.00697485	0.00368376	0.00668813	0.0204252	0.35069	0.190709
Sall3.1	0.00659454	0.00239797	0.0151409	0.0339227	1	0.423645	0.00817817	0.027394	0.103091	0.00631486	0.00208938	0.0115008	0.00970077	0.0113053	0.557066
Emx1.1	0.0246349	0.100652	0.016934	0.0147149	1	0.878973	0.106405	0.0318497	0.0524713	0.0228326	0.0197631	0.0252297	0.0073648	0.0621799	0.449422
Plppr1	0.0215565	0.13696	0.0155497	0.050777	0.041299	1	0.587419	0.363673	0.551333	0.00844138	0.00771489	0.0197636	0.00903584	0.0614364	0.292912
Cav2	0.0336969	0.0283845	0.0774645	0.0422079	0.0922005	0.781805	1	0.402715	0.347988	0.396966	0.068368	0.0631026	0.579585	0.235789	0.277215
Tacstd2	0.0697713	0.0227979	0.389038	0.0892912	0.144276	0.716706	1	0.0643716	0.063395	0.0422586	0.0496745	0.0416994	0.802873	0.133774	0.221228
Slc2a9	0.0157016	0.147827	0.0356424	0.00952992	0.0850407	1	0.0361977	0.229173	0.488433	0.109953	0.141427	0.0445002	0.0583392	0.0366914	0.167166
X4930550C14Rik	0.0336646	0.0318264	0.0668514	0.108109	0.742857	1	0.908689	0.139001	0.141212	0.0329338	0.0230065	0.0458014	0.0148245	0.017394	0.955243
Kcnj10.1	0.0313439	0.0157455	0.0223301	0.25295	0.750254	1	0.3488	0.059385	0.0881021	0.0290604	0.116288	0.0320091	0.0277971	0.0195459	0.510459
Tmem178	0.0421346	0.0951889	0.0194108	0.196078	0.176097	1	0.379024	0.0466482	0.0707275	0.0261974	0.00944613	0.024117	0.0279328	0.0248748	0.288504
Cdo1	0.0294383	0.103086	0.162841	0.108995	0.189595	1	0.420699	0.0856235	0.0640401	0.0415531	0.0379161	0.0408736	0.510461	0.0636092	0.264091
Cldn4.1	0.0083208	0.0171313	0.73761	0.0319426	0.0855094	0.596425	0.598346	0.258652	0.243891	0.0334378	0.024635	0.0266652	1	0.0866452	0.0626403
Olfm1	0.0534646	0.0207474	0.289597	0.0285831	0.0357565	1	0.737648	0.300045	0.531677	0.311322	0.368534	0.438724	0.0379716	0.156552	0.194926
Pde3b	0.163705	0.0413917	0.0446713	0.0151831	0.270078	1	0.952395	0.136631	0.19572	0.0351788	0.299703	0.074005	0.22108	0.181663	0.49636
Sdk1	0.0181336	0.0367051	0.29915	0.0262461	0.141738	0.66866	0.480878	0.0490402	0.0707035	0.0319645	0.00918163	0.0446016	0.0930233	1	0.571986
Tox3.1	0.0060562	0.0025528	0.0252437	0.0663202	1	0.787168	0.235245	0.140793	0.415169	0.00853173	0.00243296	0.0174462	0.130435	0.0322863	0.53313
Kif26b	0.0047776	0.0022902	0.00236138	0.00955353	0.00308428	0.541367	1	0.22372	0.139572	0.0172191	0.00479786	0.554809	0.00975241	0.022782	0.0918087
Krt18	0.017003	0.00726793	0.141123	0.0201513	0.0262044	0.417503	0.606028	0.0593812	0.0947735	0.0154843	0.0148499	0.014266	1	0.0365246	0.0860343
Tmem52b.1	0.0120996	0.0174631	0.0255331	0.141693	0.927217	1	0.10754	0.0922129	0.187665	0.0304767	0.0254544	0.0246926	0.0148268	0.0152929	0.487474
Kl	0.02717	0.103504	0.0224321	0.0792582	0.207374	1	0.0958835	0.0469571	0.0514418	0.0259563	0.0125604	0.0240724	0.0102764	0.0304012	0.208808
Rhcg	0.00780884	0.00455824	0.00795331	0.00484559	0.23211	0.533953	0.350186	1	0.577237	0.00972307	0.00628989	0.0108372	0.00514303	0.00252612	0.0998139
X4933406I18Rik.1	0.158059	0.0288841	0.0214903	0.0132255	0.491403	1	0.726474	0.102741	0.184993	0.0191663	0.179019	0.0708167	0.181031	0.323137	0.488838
Scg5	0.0832077	0.0235473	0.0891843	0.0953632	0.350745	0.999278	1	0.119306	0.333481	0.0272385	0.040307	0.0376617	0.0205529	0.0725614	0.102694
Apol6	0.0231689	0.0189802	0.0070505	0.0352095	0.397502	1	0.705191	0.2337	0.12811	0.0245016	0.0192845	0.786849	0.0851398	0.0312635	0.544291
Fzd7	0.128459	0.0835119	0.0662763	0.0499167	0.0289562	1	0.310286	0.0785832	0.0908254	0.0578012	0.0738703	0.219929	0.103267	0.224298	0.237134
Gata2	0.0309957	0.00600386	0.00666064	0.00521173	0.00662947	0.695386	1	0.445266	0.378705	0.300516	0.0106603	0.0159687	0.404053	0.0254437	0.19261
Gm13652	0	0.00631001	0.00336388	0.147746	0.602024	1	0.591503	0.0930685	0.187138	0.0136031	0.00204233	0.0117375	0.0330258	0	0.751008
Cav1	0.0299579	0.012762	0.017124	0.0183351	0.0552461	1	0.655218	0.0655895	0.22685	0.935404	0.0312845	0.0957254	0.178913	0.214544	0.338177
Adamts16.1	0.0889794	0.0110816	0.00521317	0.0900737	0.834171	1	0.235013	0.0856984	0.0627019	0.0568342	0.00191831	0.00917012	0	0.610199	0.371277
Hsd11b2	0.01574	0.0106984	0.012124	0.0109635	0.0157541	0.565323	1	0.031101	0.0388204	0.0190629	0.0114056	0.0172684	0.0199732	0.0138522	0.146124
Atp2b4	0.0149332	0.00712365	0.0113481	0.0782248	0.351459	1	0.0211993	0.0328683	0.0777258	0.287661	0.278134	0.234462	0.0155017	0.119513	0.295553
AI838599	0.00971719	0.01049	0.00865317	0.247121	0.0754362	1	0.246474	0.148209	0.056017	0.0648047	0.00417684	0.15095	0.00683781	0.489158	0.224033
Rhbg	0.019002	0.0124511	0.0261399	0.0131889	0.018879	0.634895	0.148977	1	0.550546	0.0259505	0.0145071	0.02378	0.0825473	0.00589553	0.0599456
Ltc4s.1	0.0191154	0.0167531	0.0217418	0.0318841	0.545951	1	0.0779766	0.0622046	0.164712	0.255145	0.0564842	0.0819077	0.0523539	0.0216813	0.193622
Etv4	0.0200455	0.00686192	0.0136748	0.0754504	0.685347	1	0.0149636	0.0418611	0.0534624	0.0483549	0.0163083	0.0423776	0.0578384	0.119041	0.644023
Clu	0.045742	0.0254258	0.0562268	0.0592622	0.15795	1	0.428874	0.0481971	0.0996927	0.0443428	0.0599084	0.0402759	0.838622	0.078215	0.209775
Ptges	0.0198035	0.0138531	0.0335092	0.0233132	0.0322588	1	0.861864	0.102423	0.231309	0.0195111	0.0796949	0.253749	0.501899	0.023712	0.154012
Atp2b2	0.00307078	0.00565161	0.00655842	0.0186539	0.356669	1	0.478348	0.0779023	0.159304	0.0990629	0.0265729	0.0101147	0	0	0.398565
Adamts3	0.051679	0.0151148	0.0272808	0.0445259	0.207488	1	0.211515	0.0443412	0.0609502	0.0478428	0.0775161	0.203524	0.0896502	0.0579211	0.21494
Phactr1.1	0.0153322	0.0109468	0.012569	0.0110617	0.364737	1	0.485221	0.0289015	0.171674	0.0289452	0.00189137	0.0839061	0.0200274	0.0396941	0.27543
Pgam2	0.0136732	0.0228076	0.0337609	0.0316199	0.316681	1	0.128562	0.0880686	0.131114	0.0201098	0.0354586	0.0292597	0	0.00747401	0.176924
Gm15810	0	0.00438189	0	0.00729978	0.406241	1	0.569577	0.00149495	0.19189	0	0	0.0048293	0.0119213	0	0.23914
Klk1	0.029004	0.020871	0.0242859	0.0842393	0.102317	1	0.0300473	0.044534	0.12306	0.0329645	0.0289859	0.0305721	0.0171802	0.0309307	0.128162
Scnn1b	0.0114715	0.00474839	0.0137719	0.00592529	0.0726858	1	0.688169	0.437369	0.110703	0.00821538	0.00860609	0.0100487	0.0410222	0.00338536	0.14244
S100g	0.026399	0.0285891	0.0259799	0.0304562	0.0302547	1	0.0312002	0.0890822	0.107436	0.0395947	0.0365312	0.0357092	0.0194293	0.0321065	0.114794
Kcne1	0.00905923	0.00910106	0.00706773	0.0092318	0.0155038	1	0.557205	0.0539244	0.0977478	0.0146455	0.013979	0.0097413	0.00881059	0.0152646	0.0949515
Scnn1g	0.0100071	0.00471929	0.00382901	0.00513338	0.0158579	1	0.678778	0.0546915	0.0523452	0.00716107	0.0049909	0.00830903	0.0608815	0.00664037	0.139083
Calb1	0.0102123	0.00751816	0.00788325	0.00735165	0.201042	1	0.113679	0.0233101	0.0428435	0.0125569	0.0101057	0.0101597	0.00399988	0.00603672	0.156919
Slc8a1	0.00172798	0.000666538	0.00500948	0.000872212	0.093961	1	0.0292287	0.00989796	0.0207242	0.00343436	0.0342747	0.0335956	0.0031693	0.00360483	0.0930314
Trpv5	0.00587176	0.00269182	0.00353126	0.00398673	0.00809411	1	0.0757418	0.0408222	0.103706	0.00892414	0.00388347	0.0089024	0.00231033	0.00171267	0.102503
Egfem1	0.00399143	0.00317309	0.00189452	0.00109465	0.00212055	1	0.0506976	0.00232209	0.018895	0.00190742	0.00357327	0.00156623	0.00271101	0.00343858	0.117193
Tfap2a.2	0.0149331	0.00382195	0.0052898	0.0413662	0.589227	0.596332	1	0.502655	0.478072	0.00938063	0.00380761	0.0134497	0.218094	0.00468791	0.597665
Scnn1b.1	0.0114715	0.00474839	0.0137719	0.00592529	0.0726858	1	0.688169	0.437369	0.110703	0.00821538	0.00860609	0.0100487	0.0410222	0.00338536	0.14244
Krt19	0.00279887	0.000896528	0.00810598	0.00133183	0.00146815	0.0321672	0.0834953	0.000755697	0.00353934	0.00132316	0.00237284	0.00149935	1	0.000293284	0.0100299
L1cam.1	0.0218569	0.0081864	0.370253	0.161778	0.0597351	0.532351	1	0.148025	0.03063	0.0333281	0.0572618	0.0249047	0.32359	0.155157	0.157788
Slc14a2.1	0.00107838	0.0201658	1	0.00596003	0.00172931	0.0104816	0.465299	0.00629285	0.00131577	0.00526923	0.00219317	0.00467869	0.0426288	0	0.00302633
Itga2	0.296459	0.0114184	0.0469596	0.0120412	0.023916	0.020847	0.412086	0.0123831	0.0962792	0.0461745	0.0651946	0.162565	1	0.0492397	0.00770911
Apela.1	0.00709001	0.0167327	1	0.091877	0.00992257	0.10854	0.780691	0.0285142	0.0179607	0.0191264	0.0200711	0.0269906	0.0799845	0.0631999	0.068652
Gstm2	0.0689859	0.0366271	0.17969	0.0996925	0.0650489	0.130792	1	0.101547	0.0815536	0.110288	0.0442044	0.216456	0.8317	0.41352	0.125906
Lypd6	0.0373749	0.0456305	0.00459525	0.00350144	0.089647	0.581632	1	0.40124	0.196395	0.152603	0.00521085	0.0540032	0.390369	0.0592855	0.224565
Gm26688.2	0.0106934	0.00366211	0.0153958	0.0368388	0.443174	0.494944	1	0.449486	0.361917	0.00767807	0.00789245	0.017653	0.284148	0.00563222	0.522371
Scnn1g.1	0.0100071	0.00471929	0.00382901	0.00513338	0.0158579	1	0.678778	0.0546915	0.0523452	0.00716107	0.0049909	0.00830903	0.0608815	0.00664037	0.139083
Ociad2	0.0494031	0.035706	0.186034	0.039321	0.0220761	0.0446016	0.999343	0.55031	0.758245	0.0680903	0.0486097	0.105147	1	0.0562582	0.0312795
Atp10b	0.0162321	0.00473312	0.79872	0.0859931	0.219006	0.268486	0.955609	0.0503893	0.0610564	0.00414369	0.00563443	0.0135627	1	0.00238797	0.150913
Lcn2	0.0279866	0.0243943	0.219759	0.144051	0.108418	0.10054	1	0.0426132	0.036855	0.0491474	0.0636504	0.035005	0.153777	0.0552292	0.101621
Krt80	0.0179348	0.0113021	0.167752	0.0243685	0.0174257	0.0830609	1	0.607015	0.573452	0.324239	0.179662	0.033868	0.152839	0.034928	0.0220526
Gata3.1	0.0132143	0.00326088	0.00495512	0.00507	0.253299	0.38831	0.810813	0.382786	0.268052	0.014436	0.0509791	0.037228	1	0.00200871	0.195589
Krt18.1	0.017003	0.00726793	0.141123	0.0201513	0.0262044	0.417503	0.606028	0.0593812	0.0947735	0.0154843	0.0148499	0.014266	1	0.0365246	0.0860343
Fam129a	0.0301768	0.0253883	0.0332313	0.0145112	0.0630524	0.312889	1	0.139932	0.314407	0.0278594	0.208435	0.0625357	0.0632699	0.0967094	0.091876
Ptgs1	0.0226578	0.0218391	0.0747573	0.0129383	0.0735092	0.320575	1	0.126049	0.0194164	0.32264	0.101358	0.087745	0.654408	0.0904936	0.0962325
Tmem30b	0.036272	0.0170895	0.512648	0.0896724	0.0665829	0.153733	1	0.201559	0.101988	0.0263474	0.0360699	0.0334902	0.749103	0.0383697	0.0911641
Gata2.1	0.0309957	0.00600386	0.00666064	0.00521173	0.00662947	0.695386	1	0.445266	0.378705	0.300516	0.0106603	0.0159687	0.404053	0.0254437	0.19261
Rab15	0.0131312	0.00752068	0.0654371	0.034118	0.105725	0.439339	1	0.528885	0.505966	0.0482198	0.0168841	0.0739382	0.816124	0.0468027	0.16676
Pappa	0.00956671	0.0221172	0.00779641	0.11131	0.205326	0.279389	1	0.0129771	0.0474405	0.00814942	0.00292429	0.0633255	0.00240466	0.00212467	0.143377
AU021092	0.0112967	0.0079627	0.071725	0.0101836	0.0030884	0.0156484	0.882891	0.0318849	0.0281842	1	0.0232779	0.0218376	0.142214	0.0177239	0.0146146
B3gnt7	0.0268159	0.0286543	0.114766	0.0419719	0.104407	0.268613	1	0.144175	0.275876	0.0158083	0.0324064	0.0246189	0.148403	0.00807856	0.118105
Tspan1.1	0.0117118	0.0135418	0.0280132	0.0849693	0.0554392	0.440075	1	0.107729	0.161874	0.0238588	0.0135381	0.0320428	0.244797	0.00944291	0.0872966
Tmem45b.1	0.00781263	0.0397075	0.054161	0.0195233	0.06285	0.384966	1	0.0845923	0.0269863	0.0112924	0.0071179	0.00907245	0.420599	0.00799799	0.124305
Fam174b.1	0.0922415	0.0088764	0.669431	0.0325025	0.00365872	0.221715	1	0.0450655	0.021011	0.193513	0.0381378	0.070501	0.475628	0.154759	0.0316819
Mal2	0.00643669	0.00734517	0.122631	0.110862	0.125696	0.187329	1	0.118065	0.201251	0.0160822	0.0102591	0.0153793	0.493225	0.0213576	0.141792
Arl4d	0.452713	0.0120636	0.324778	0.0331666	0.0196439	0.131212	1	0.310457	0.28053	0.0703725	0.0393962	0.0227387	0.0928463	0.165984	0.0707379
Kif26b.1	0.0047776	0.0022902	0.00236138	0.00955353	0.00308428	0.541367	1	0.22372	0.139572	0.0172191	0.00479786	0.554809	0.00975241	0.022782	0.0918087
Fam171a2	0.101726	0.0115357	0.258952	0.04469	0.0256567	0.261299	1	0.105873	0.0969963	0.0932206	0.0144228	0.0571826	0.397543	0.101566	0.127715
Sptbn2	0.0122141	0.0103131	0.0812375	0.0778697	0.0554618	0.212228	1	0.389634	0.209288	0.0203219	0.00909493	0.0183956	0.163688	0.0101933	0.0610285
Gprc5b	0.0249395	0.0115139	0.0226561	0.00609809	0.0076334	0.19617	1	0.100308	0.00443619	0.513403	0.0126428	0.0924358	0.337843	0.01954	0.114355
Gm13256.1	0.024902	0.00408247	0.0068029	0.00562408	0.1266	0.301485	0.90264	0.294541	0.158264	0.0190821	0.0458157	0.0252042	1	0.00324123	0.107101
Wnt4	0.057447	0.00584984	0.0530118	0.00601636	0.0126803	0.0398355	0.426623	0.0363958	0.0705744	0.0166224	0.0153882	0.0790453	1	0.00209777	0.00883194
Dab1	0.00709304	0.0475532	0.0440893	0.0460446	0.00653839	0.0133235	1	0.00947363	0.00676974	0.00921822	0.00500823	0.00912639	0.0379832	0.154259	0.0387471
Plet1os	0.0128937	0.00519028	0.427506	0.0859259	0.0124756	0.0591348	1	0.220482	0.216476	0.0118256	0.0060244	0.00909699	0.319755	0.0306373	0.0126091
Styk1	0.00845352	0.0142868	0.0537017	0.0110949	0.0148274	0.0927781	0.86763	0.0809501	0.0319203	0.0255634	0.0508535	0.0677226	1	0.598108	0.046501
Hsd11b2.1	0.01574	0.0106984	0.012124	0.0109635	0.0157541	0.565323	1	0.031101	0.0388204	0.0190629	0.0114056	0.0172684	0.0199732	0.0138522	0.146124
Rasgrf2	0.00919007	0.007596	0.00392071	0.00557052	0.00313793	0.340508	1	0.0312799	0.0369913	0.336227	0.0316513	0.0148635	0	0.0173106	0.084054
Muc1	0.0150215	0.0108452	0.17282	0.0626743	0.0273255	0.0643631	1	0.0900632	0.102074	0.0212423	0.0234921	0.0243978	0.3479	0.00720688	0.0745989
Nipal1	0	0.00430572	0.0658574	0.0673958	0.0172278	0.0272671	1	0.0606633	0.0276537	0.0153009	0.0570124	0.123041	0.552728	0.0123687	0.00827658
Col26a1	0.0349811	0.00409303	0.00216991	0.00405491	0.00666361	0.510789	1	0.0313025	0.016601	0.00394369	0.00187365	0.0289267	0.0080993	0.0108447	0.277409
Frmpd4	0.0109381	0.00464456	0.0417801	0.00849298	0.00606088	0.305272	1	0.192162	0.286579	0.00499394	0.0176512	0.00827858	0.00892505	0.0220725	0.0719031
Plet1.1	0.0058819	0.00620778	0.282715	0.0381049	0.00929557	0.0364014	1	0.0997914	0.146548	0.0128782	0.0120761	0.0125916	0.485253	0.0100123	0.0199119
Btc	0.0016832	0.0231829	0.0131991	0.0161497	0.0349532	0.128963	1	0.0225319	0.0399347	0.00593845	0.00327065	0.0131113	0.0181181	0.00517373	0.0684381
Tbx3	0.00305334	0.00235758	0.00507576	0.00228477	0.00208628	0.00584026	0.721074	0.1328	0.0375929	0.165963	0.00741766	0.124885	1	0.00982579	0.0139212
Avpr2	0.00749321	0.00675528	0.0274541	0.0384662	0.00530564	0.258724	1	0.0394365	0.0225004	0.00976456	0.0133655	0.0110663	0.0522465	0	0.0610873
Muc4	0.00513732	0.00437231	0.0226643	0.0144101	0.0246897	0.0453837	1	0.653619	0.255076	0.018307	0.0117318	0.00556897	0.0924199	0.0042851	0.033566
Adora1	0.00179611	0.00451978	0.346553	0.0117752	0.00198624	0.0176656	1	0.370713	0.115908	0.010702	0.00778412	0.0413108	0.0776642	0.176945	0.0484127
Spink8	0.00882469	0.00840584	0.0233891	0.0107466	0.0105161	0.147519	1	0.159719	0.296951	0.0130002	0.0152533	0.0151842	0.0289914	0.00943886	0.0608038
Adgra1	0	0.00915362	0.0639224	0.0123592	0.0231354	0.149361	1	0.0111481	0.0102876	0.0144573	0.0106142	0.0484238	0.00586671	0.567123	0.032344
Ros1	0.0257495	0.0193081	0.0172469	0.0178772	0.0240943	0.0533638	1	0.0171922	0.0172377	0.00511564	0.0154593	0.013811	0.0497367	0.00460506	0.0481925
Epor	0.0125577	0.00470672	0.166771	0.0411729	0.00786768	0.0523118	1	0.0234697	0.00558796	0.00339563	0.00286012	0.0623338	0.258211	0.0157483	0.00445815
Ptger1	0.0167633	0.00892229	0.0151422	0.0241467	0.0145214	0.0818508	1	0.0270354	0.0261494	0.0189749	0.0232288	0.0448895	0.0237948	0.00906481	0.0340582
Sbspon	0	0.0102976	0.0184596	0.0169979	0.0206187	0.026839	1	0.048898	0.00761744	0.0183502	0.0102994	0.0526285	0.805565	0.0220007	0.0263828
Fxyd4	0.00784364	0.0125351	0.0266648	0.0129041	0.010648	0.0782211	1	0.069846	0.01847	0.0185241	0.0120427	0.0139296	0.11363	0.0163702	0.0235016
Muc20	0.0040774	0.0043595	0.154558	0.00694614	0.00591776	0.018651	1	0.366133	0.027046	0.0103618	0.0083615	0.00891149	0.346765	0.00746067	0.00508453
Aqp3	0.00808581	0.00757559	0.00542562	0.00453643	0.00442787	0.144309	1	0.0340555	0.0634002	0.00919618	0.00567358	0.0138032	0.042613	0.0107103	0.0343749
Ptprh	0	0.00566148	0.00345182	0.00264989	0.00621803	0.0660421	1	0.232743	0.0168992	0.00117168	0.0100074	0.00446304	0.435751	0	0.0217974
Aqp2	0.00935193	0.00614855	0.0100362	0.00659782	0.0062741	0.103899	1	0.0127314	0.0164113	0.0105875	0.00669096	0.0107782	0.00559919	0.0067632	0.0355553
Wnt9b	0	0.00543094	0.00986713	0.0182174	0.00249958	0.0127469	1	0.00373654	0.00756006	0.0397212	0.00198986	0	0.0178716	0.0121805	0.0130037
Aqp4	0.00108151	0.0105786	0.00690924	0.00388296	0.00399273	0.0114805	1	0.0092113	0.00842245	0.00712269	0.00389056	0.00783216	0.0729066	0.00403207	0.0081967
Mcoln3	0.00151449	0.00294453	0.011256	0.0030502	0.00114517	0.04417	1	0.0568575	0.0817864	0.00604583	0.0132394	0.00865217	0	0	0.0428879
Mgat4c	0.0172501	0.0056227	0.00583236	0.00638075	0.00378865	0.014842	1	0.0214867	0.049028	0.00229413	0.00160981	0.00403139	0.0307745	0.00971758	0.0740094
Aldh1a3	0.0226308	0.003638	0.000995386	0.00510984	0.00482247	0.00367739	1	0.0151353	0.0171907	0.0175312	0.00494898	0.0625651	0	0.035557	0.00453878
Elf5	0.00555909	0.003211	0.00343193	0.00502931	0.00343621	0.0161514	1	0.0889425	0.00781076	0.00960193	0.00378668	0.00962236	0.138232	0.00925231	0.0180283
Grem2	0.00065034	0.00112987	0.00359504	0.00160669	0.00183943	0.0767018	1	0.00435461	0.02262	0.00358455	0.00202112	0.0396974	0.00150546	0.00304831	0.0181993
Fmn2	0	0.00542311	0.00365571	0.00444895	0.00413577	0.0049222	1	0.00356808	0.00174828	0.00230388	0.00260305	0.0248406	0	0.0229715	0.00929151
Dmxl1	0.0583184	0.141958	0.0801611	0.0942122	0.0866798	0.0725925	0.0663437	0.93516	1	0.0598524	0.064333	0.0585871	0.0664661	0.0734347	0.086683
Pam	0.0812279	0.176293	0.0425346	0.0506618	0.0601838	0.0296653	0.0271702	1	0.528252	0.0765679	0.031417	0.0774557	0.0736923	0.0768802	0.0673196
Tshr	0.00492706	0.039699	0.02947	0.0541109	0.00370972	0.00744641	0.00485107	0.425598	1	0.00656806	0.00212273	0.00241941	0.00323791	0.00352495	0.00805558
Plekhd1.1	0.00513013	0.00350092	0.0535473	0.10792	0.489399	0.354563	0.0714913	0.797362	1	0.00750999	0.00672946	0.00800372	0.0122489	0.0151228	0.316163
Slc35f1	0.0102466	0.101973	0.103516	0.0213049	0.00505547	0.00922012	0.0140471	1	0.0185488	0.0501876	0.00576051	0.0173809	0	0.0183632	0.0296283
Clcnkb.1	0.0344813	0.0252208	0.0484033	0.347337	0.84089	0.837088	0.137959	1	0.956629	0.0511359	0.0371128	0.0460373	0.0174354	0.0354266	0.311648
Scnn1b.2	0.0114715	0.00474839	0.0137719	0.00592529	0.0726858	1	0.688169	0.437369	0.110703	0.00821538	0.00860609	0.0100487	0.0410222	0.00338536	0.14244
Plcb4	0.128521	0.0237636	0.498518	0.225217	0.279984	0.415132	0.592802	1	0.260639	0.622353	0.023317	0.0788907	0.381621	0.623005	0.408734
Lrrc31.1	0.00645119	0.00228676	0.160233	0.651414	0.173562	0.0206782	0.172106	1	0.0720399	0.0138524	0.00346631	0.0121118	0.161097	0	0.250284
Itpr2	0.028703	0.126348	0.0728746	0.0654748	0.166763	0.133906	0.0902913	0.948479	1	0.0974617	0.107377	0.0725687	0.0465263	0.0984126	0.083413
Tfcp2l1	0.0130855	0.0452498	0.058258	0.255413	0.324979	0.567213	0.326758	1	0.86235	0.0230215	0.0139776	0.0182862	0.0241904	0.0738283	0.324389
Plcg2	0.00674888	0.0128473	0.0188489	0.0266758	0.028083	0.0639655	0.0649765	0.419787	1	0.043154	0.292868	0.0258655	0.0633325	0.00959007	0.0616379
Cacnb2	0.0360345	0.00369193	0.108288	0.356264	0.0101941	0.162849	0.840374	1	0.222079	0.0145167	0.00478094	0.164249	0.156165	0.0873879	0.219425
Muc20.1	0.0040774	0.0043595	0.154558	0.00694614	0.00591776	0.018651	1	0.366133	0.027046	0.0103618	0.0083615	0.00891149	0.346765	0.00746067	0.00508453
Defb1	0.0296378	0.0237172	0.0538785	0.252202	0.250703	0.512137	0.219837	1	0.452234	0.043387	0.0443535	0.036799	0.0887166	0.0297096	0.118489
Nav1	0.0222594	0.00663742	0.14018	0.0199663	0.0662708	0.223246	0.829984	1	0.367329	0.744639	0.183482	0.532733	0.272834	0.0369675	0.146189
Ica1	0.0109511	0.0561409	0.162692	0.0783413	0.211285	0.254851	0.150948	1	0.503541	0.574159	0.0140185	0.0528032	0.273796	0.149384	0.183765
Pros1	1	0.01959	0.055983	0.040612	0.0281535	0.0223657	0.0476707	0.659644	0.726536	0.332985	0.120085	0.269299	0.0754757	0.126663	0.0266431
Susd1	0.0141107	0.0834826	0.252289	0.0439904	0.179331	0.20829	0.223581	1	0.911107	0.031159	0.00923069	0.0170689	0.0791995	0.159143	0.148863
Rabep2	0.0475483	0.0524467	0.0830409	0.15069	0.0867892	0.0652266	0.0596809	0.939516	1	0.0932493	0.0836484	0.0709835	0.0543146	0.0923335	0.107335
Epb41l2	0.102247	0.011062	0.115427	0.0121968	0.0194131	0.0174716	0.0249774	1	0.547782	0.368016	0.474319	0.611846	0.0807722	0.114414	0.069535
Smim5	0.01774	0.0174914	0.131446	0.191384	0.0871043	0.280353	0.195027	1	0.401156	0.015655	0.042352	0.0224705	0.249757	0.0822662	0.0608857
Alcam	0.531969	0.0374915	0.0846433	0.0113161	0.00401958	0.0422166	0.207903	1	0.672194	0.0454704	0.283098	0.245039	0.541967	0.0954434	0.0333546
Slc4a9	0.00184975	0.000610061	0.000462765	0.00973513	0.00719121	0.00613752	0.002915	0.239926	1	0.00205591	0.000778519	0.00186823	0.000635972	0.000678428	0.00225986
Mab21l3	0.00344082	0.0272243	0.0106034	0.0369337	0.0175075	0.0185104	0.0101654	0.599729	1	0.0103821	0.0247718	0.0110402	0.0136087	0.00896012	0.0466958
P2ry14	0.174436	0.00612402	0.00883168	0.0294364	0.140393	0.0425357	0.052623	1	0.149544	0.0141344	0.421996	0.066155	0.0846651	0.125802	0.141384
Rapgef4	0.00811147	0.0269691	0.00568783	0.0200473	0.00438227	0.0129125	0.0131973	1	0.159525	0.905415	0.0157908	0.0428664	0.0054638	0.0612025	0.0164526
Ccbe1	0.0592229	0.00203884	0.0101322	0.175655	0.00858085	0.00829698	0.0123035	1	0.762487	0.0125099	0.00312986	0.401847	0.00950967	0.00352463	0.0326548
Rhcg.1	0.00780884	0.00455824	0.00795331	0.00484559	0.23211	0.533953	0.350186	1	0.577237	0.00972307	0.00628989	0.0108372	0.00514303	0.00252612	0.0998139
Sytl5	0.00715234	0.0123592	0.00922736	0.00952221	0.0600043	0.0156207	0.0960005	0.888217	1	0.0285058	0.00462976	0.501419	0.510356	0.318803	0.12577
Plagl1	1	0.00629941	0.131902	0.0781873	0.00982012	0.0237756	0.0644168	0.93008	0.996386	0.0125119	0.0103578	0.0348491	0.155673	0.116847	0.0496047
Junos	0.0307845	0.0309137	0.0183537	0.0357211	0.0570661	0.0528334	0.282332	1	0.35865	0.114136	0.0335549	0.0368447	0.58609	0.0207262	0.0388822
Tmem117	0.00310706	0.00103963	0.00366255	0.0309551	0.0452965	0.0806857	0.0851332	0.545434	1	0.00392212	0.000641811	0.00438156	0.0100392	0.00629712	0.0598663
Rhbg.1	0.019002	0.0124511	0.0261399	0.0131889	0.018879	0.634895	0.148977	1	0.550546	0.0259505	0.0145071	0.02378	0.0825473	0.00589553	0.0599456
Serpinb9	0.121376	0.0252484	0.112946	0.0203479	0.0341076	0.0592789	0.0553614	1	0.595593	0.119341	0.0524999	0.0895245	0.0809866	0.097953	0.0321754
Syn2	0.00954142	0.00903419	0.0040312	0.00475945	0.0712966	0.0292968	0.0169445	0.563432	1	0.00903294	0.00104204	0.0211499	0.00167154	0.00272517	0.0387128
Atp6v1b1	0.0126046	0.00279592	0.00465775	0.0680955	0.191801	0.176248	0.0593497	1	0.923848	0.00428262	0.00408614	0.0121331	0.00440201	0	0.0970477
Rasef	0.0416997	0.00499473	0.337821	0.0877889	0.000578227	0.0174814	0.237742	1	0.374897	0.0170566	0.00509921	0.0311151	0.848932	0.0373413	0.0294127
Rcan2	0.0143257	0.00481458	0.140362	0.0539926	0.00155196	0.00577792	0.014976	0.780619	1	0.00811554	0.00195223	0.0753996	0.00238295	0.190254	0.00760702
Parm1.1	0.012028	0.00942224	0.60786	0.0114117	0.00296975	0.0619096	0.138357	1	0.760001	0.0147843	0.00588063	0.0381522	0.445799	0.120446	0.024721
Pde1c	0.0164292	0.01501	0.0224301	0.015549	0.0148241	0.076573	0.502532	1	0.539371	0.015919	0.016189	0.0300786	0.0287602	0.0176909	0.0334966
Chst8.1	0.0149998	0.00436727	0.51645	0.059815	0.0169256	0.116593	0.0330268	1	0.124306	0.163775	0.00238386	0.0418298	0.098062	0.00778776	0.0812684
Hepacam2	0.00162819	0.00155301	0.000972403	0.00217878	0.00194761	0.00761489	0.00575675	0.416435	1	0.00259945	0.0036061	0.00306791	0.00953569	0.0048151	0.000617772
X9130008F23Rik	0.0125204	0.00244044	0.0394452	0.00116279	0.000360031	0.00601342	0.241243	0.755881	1	0.0240001	0.00508197	0.0656267	0.18158	0.00934732	0.00249802
Kcns3	0.00658208	0.0137479	0.0386483	0.0619915	0.00469646	0.012414	0.11902	1	0.112937	0.0171792	0.010597	0.330661	0	0.0342702	0.0147796
Negr1	0.0329513	0.00432265	0.00704759	0.00476546	0.00366727	0.00369863	0.0134158	0.944833	0.00605615	0.00676276	0.041517	1	0.00262845	0.0530246	0.00397167
Cpsf4l	0.0135357	0.0213446	0.0385024	0.0375228	0.0367692	0.030123	0.0404297	1	0.454647	0.0257003	0.0196825	0.0334166	0.014051	0.0247279	0.0194733
Eya2	0.00611613	0.00314571	0.0674014	0.00547472	0.00481381	0.00368266	0.0256478	0.603341	0.0115818	0.00675977	0.0323322	0.264107	1	0.357509	0.00219911
Bmpr1b	0.0362931	0.00191912	0.00696175	0.00286578	0.0135323	0.151904	0.389519	1	0.635232	0.00347617	0.0016737	0.133724	0.045345	0.0342427	0.0522573
Atp6v0d2	0.00281289	0.00130568	0.00243838	0.0398807	0.0195271	0.0138009	0.00769126	0.733182	1	0.00280768	0.00206242	0.00634672	0.00223362	0.00304224	0.0106105
Oxgr1	0.00817888	0.00191267	0.000526999	0.0121862	0.0641899	0.0919174	0.00740772	0.77789	1	0.00433848	0.00296628	0.00734734	0.00304788	0.00945226	0.0264417
Fgf12	0.00536107	0.0114648	0.0612818	0.00887825	0.0103581	0.18986	0.229256	1	0.179253	0.00934945	0.0046336	0.0725085	0.00559184	0.514946	0.0505893
Atp6v1g3	0.00646514	0.00447563	0.00809453	0.0047595	0.00464309	0.0280219	0.0226136	0.660911	1	0.00925172	0.00840225	0.00782053	0.00416428	0.0048559	0.00412545
Atp6v1c2	0.00391134	0.00114683	0.00309716	0.0197134	0.0178965	0.0246972	0.00653784	0.675617	1	0.00373932	0.00151866	0.00298116	0.00335146	0.00356189	0.0106294
Foxi1	0.00938057	0.0046489	0.00502237	0.00389018	0.00324837	0.0357735	0.0218055	0.87074	1	0.0119195	0.00624632	0.0127395	0.0142869	0.0105547	0.00429332
Gm12121	0.00601592	0.000190999	0.00200166	0.000377414	0.00103896	0.00124713	0.00143722	0.68968	1	0.0027305	0	0.00167457	0	0	0
Wscd2	0	0.00156483	0.00320564	0.00185253	0.00151725	0.0303675	0.198707	1	0.821233	0.00618842	0.00796229	0.00944481	0.00550471	0	0.00366022
Adgrf5	0.00642663	0.00137338	0.00295187	0.00195244	0.00152685	0.00516075	0.00701704	1	0.232554	0.361317	0.00524225	0.0153242	0.0125521	0.00308959	0.00343824
Asb15	0.417177	0.00304999	0.00392432	0.00849367	0.00100353	0.0193484	0.024096	1	0.621556	0.00459306	0.00137522	0.009173	0.0294265	0.00246148	0.0118055
Edn3	0.0120848	0.00300164	0.0477653	0.00198616	0.00135229	0.0271732	0.0292048	1	0.608951	0	0.00482663	0.0808018	0	0.218619	0
Adgrf1	0	0.00284164	0	0.00474995	0.00251227	0.0067154	0.254088	1	0.25924	0.00538778	0.00197411	0.00598637	0.0736152	0.00208166	0.00327512
Gm47662	0.00210337	0.00150629	0.00641941	0.00175071	0.0109471	0.00628707	0.00629307	1	0.483784	0.000204114	0.00507564	0.0324165	0	0.0206682	0.00899943
Clnk	0.00270411	0.0007888	0.00172365	0.000971056	0.000716667	0.00162227	0.00278127	1	0.259782	0.00266138	0.0284652	0.00239875	0	0.00218337	0.000900946
X2610016A17Rik	0.00473717	0.00448754	0	0.00310318	0.00252114	0.0187609	0.036307	1	0.0578088	0.0054624	0.00520899	0.003254	0.0270319	0	0.0103297
Kit	0.00668144	0.00239288	0.0103177	0.00113314	0.0024948	0.00475786	0.00753898	1	0.0849273	0.0450953	0.0151812	0.00776013	0.00459332	0.0118232	0.00364998
Aqp6	0.00996269	0.00319268	0.00250286	0.00392463	0.00440648	0.0142447	0.0388072	1	0.0125823	0.00564984	0.00519981	0.00896873	0.0127782	0.00291873	0.00637325
Slc26a7	0.0970909	0.001458	0.0119245	0.0102023	0.00423643	0.00243473	0.0113091	1	0.00687557	0.00278427	0.000911442	0.00335992	0	0.03799	0.00333712
Pdlim3	0	0.0011235	0.0066539	0.00360316	0.00113429	0.00649438	0.00252272	1	0.0870636	0.00319628	0.000190398	0.0551763	0.0230852	0	0.00307903
Slc4a1	0.0049445	0.00190022	0.00334641	0.00243324	0.00262019	0.0204901	0.0196568	1	0.00957705	0.00609018	0.00194862	0.00381425	0	0	0.00747333
Dmrt2	0.00184806	0.000793439	0.00283211	5.13867e-05	0.00226474	0.00458283	0.0174375	1	0.0473964	0	0.00149985	0.000513325	0	0	0.0024946
Spink8.1	0.00882469	0.00840584	0.0233891	0.0107466	0.0105161	0.147519	1	0.159719	0.296951	0.0130002	0.0152533	0.0151842	0.0289914	0.00943886	0.0608038
Epb41l2.1	0.102247	0.011062	0.115427	0.0121968	0.0194131	0.0174716	0.0249774	1	0.547782	0.368016	0.474319	0.611846	0.0807722	0.114414	0.069535
Clcnkb.2	0.0344813	0.0252208	0.0484033	0.347337	0.84089	0.837088	0.137959	1	0.956629	0.0511359	0.0371128	0.0460373	0.0174354	0.0354266	0.311648
Ripor2	0.0122771	0.00644924	0.0167766	0.0106088	0.00718886	0.0163316	0.0171245	0.046579	0.633178	0.18688	1	0.125181	0.0404716	0.0253567	0.021058
Gulp1	0.338935	0.00389927	0.0215314	0.0436497	0.0153058	0.251538	0.190684	0.115529	0.446317	0.0499815	0.00463655	1	0.0163364	0.26533	0.0816728
Itpr2.1	0.028703	0.126348	0.0728746	0.0654748	0.166763	0.133906	0.0902913	0.948479	1	0.0974617	0.107377	0.0725687	0.0465263	0.0984126	0.083413
Adgrf5.1	0.00642663	0.00137338	0.00295187	0.00195244	0.00152685	0.00516075	0.00701704	1	0.232554	0.361317	0.00524225	0.0153242	0.0125521	0.00308959	0.00343824
Alcam.1	0.531969	0.0374915	0.0846433	0.0113161	0.00401958	0.0422166	0.207903	1	0.672194	0.0454704	0.283098	0.245039	0.541967	0.0954434	0.0333546
Susd1.1	0.0141107	0.0834826	0.252289	0.0439904	0.179331	0.20829	0.223581	1	0.911107	0.031159	0.00923069	0.0170689	0.0791995	0.159143	0.148863
Rhcg.2	0.00780884	0.00455824	0.00795331	0.00484559	0.23211	0.533953	0.350186	1	0.577237	0.00972307	0.00628989	0.0108372	0.00514303	0.00252612	0.0998139
Rhbg.2	0.019002	0.0124511	0.0261399	0.0131889	0.018879	0.634895	0.148977	1	0.550546	0.0259505	0.0145071	0.02378	0.0825473	0.00589553	0.0599456
Serpinb6b	1	0.0285642	0.0681861	0.0269421	0.0396945	0.102925	0.0921041	0.785221	0.990692	0.3815	0.177101	0.743158	0.442737	0.51229	0.0399178
Pros1.1	1	0.01959	0.055983	0.040612	0.0281535	0.0223657	0.0476707	0.659644	0.726536	0.332985	0.120085	0.269299	0.0754757	0.126663	0.0266431
Rabep2.1	0.0475483	0.0524467	0.0830409	0.15069	0.0867892	0.0652266	0.0596809	0.939516	1	0.0932493	0.0836484	0.0709835	0.0543146	0.0923335	0.107335
Thsd7a.1	1	0.00487311	0.038989	0.0100727	0.00293325	0.00199187	0.0030733	0.00293117	0.207719	0.0534987	0.000786457	0.0363878	0.0124943	0.022995	0.00190272
Ccbe1.1	0.0592229	0.00203884	0.0101322	0.175655	0.00858085	0.00829698	0.0123035	1	0.762487	0.0125099	0.00312986	0.401847	0.00950967	0.00352463	0.0326548
Plekhd1.2	0.00513013	0.00350092	0.0535473	0.10792	0.489399	0.354563	0.0714913	0.797362	1	0.00750999	0.00672946	0.00800372	0.0122489	0.0151228	0.316163
Jag1	0.0306551	0.0195095	0.318608	0.142802	0.109147	0.0370434	0.0733481	0.205693	1	0.184187	0.0315509	0.0941389	0.470502	0.475063	0.0912406
Clnk.1	0.00270411	0.0007888	0.00172365	0.000971056	0.000716667	0.00162227	0.00278127	1	0.259782	0.00266138	0.0284652	0.00239875	0	0.00218337	0.000900946
Exoc3l4	0.0334092	0.063315	0.0236504	0.0151872	0.011097	0.0241638	0.0381617	0.62677	1	0.163028	0.0449821	0.212843	0.0621184	0.0533132	0.0240447
Nbea	0.0298814	0.0216097	0.111028	0.154229	0.143087	0.115839	0.0862845	0.0246374	1	0.123843	0.00351316	0.0969039	0.0367732	0.168303	0.104743
Irs1	0.105198	0.00744292	0.0128037	0.225902	0.145439	0.108702	0.0191155	0.199714	1	0.0100227	0.00286627	0.0742683	0.0271483	0.0414881	0.107547
Bmpr1b.1	0.0362931	0.00191912	0.00696175	0.00286578	0.0135323	0.151904	0.389519	1	0.635232	0.00347617	0.0016737	0.133724	0.045345	0.0342427	0.0522573
Parm1.2	0.012028	0.00942224	0.60786	0.0114117	0.00296975	0.0619096	0.138357	1	0.760001	0.0147843	0.00588063	0.0381522	0.445799	0.120446	0.024721
Tmod1	0.0475665	0.029204	0.0727817	0.0518316	0.0415131	0.159819	0.107375	0.841917	1	0.045713	0.0560587	0.0766448	0.0291207	0.0552799	0.0621847
Rgs2	0.021206	0.00866542	0.0160473	0.103766	0.10007	0.0699152	0.0923898	0.220791	1	0.0372706	0.202628	0.0445736	0.0133079	0.00546489	0.0359903
Pde4b	0.183306	0.0311619	0.0139816	0.0430273	0.0253634	0.0243924	0.0249825	0.517049	1	0.215706	0.0779321	0.0458362	0.0173639	0.0370487	0.0277984
Atp6v1b1.1	0.0126046	0.00279592	0.00465775	0.0680955	0.191801	0.176248	0.0593497	1	0.923848	0.00428262	0.00408614	0.0121331	0.00440201	0	0.0970477
Plcg2.1	0.00674888	0.0128473	0.0188489	0.0266758	0.028083	0.0639655	0.0649765	0.419787	1	0.043154	0.292868	0.0258655	0.0633325	0.00959007	0.0616379
Plagl1.1	1	0.00629941	0.131902	0.0781873	0.00982012	0.0237756	0.0644168	0.93008	0.996386	0.0125119	0.0103578	0.0348491	0.155673	0.116847	0.0496047
Pkib	0.010421	0.00846051	0.0144798	0.00925955	0.00474795	0.0428496	0.0644641	0.255393	1	0.0296443	0.432078	0.035114	0	0.00784613	0.0308429
Sytl5.1	0.00715234	0.0123592	0.00922736	0.00952221	0.0600043	0.0156207	0.0960005	0.888217	1	0.0285058	0.00462976	0.501419	0.510356	0.318803	0.12577
Bdkrb2	0	0.00503821	0.00883353	0.0933787	0.184813	0.251261	0.012932	0.241352	1	0.0396683	0.013275	0.0188756	0	0.103409	0.115057
Lmcd1	0.0285886	0.0199103	0.00571897	0.00406182	0.00525942	0.0113715	0.0295795	0.308966	1	0.570057	0.00645702	0.149518	0.10853	0.360614	0.003117
Chl1	0.017596	0.0401458	0.0349911	0.0358846	0.0297241	0.0289057	0.0489585	0.0460863	1	0.0430333	0.0630341	0.0391178	0.322392	0.00231619	0.0425272
Tshr.1	0.00492706	0.039699	0.02947	0.0541109	0.00370972	0.00744641	0.00485107	0.425598	1	0.00656806	0.00212273	0.00241941	0.00323791	0.00352495	0.00805558
Stap1	0.010042	0.0101455	0.0101991	0.00974397	0.0109132	0.0187623	0.0170944	0.184217	1	0.0383716	0.341142	0.0282838	0	0	0.0129383
Adcy5	1	0.00589798	0.00701983	0.0120783	0.00849553	0.011198	0.0120241	0.73983	0.867018	0.00842883	0.0177787	0.247981	0	0.0739164	0.0113106
Asb15.1	0.417177	0.00304999	0.00392432	0.00849367	0.00100353	0.0193484	0.024096	1	0.621556	0.00459306	0.00137522	0.009173	0.0294265	0.00246148	0.0118055
Mab21l3.1	0.00344082	0.0272243	0.0106034	0.0369337	0.0175075	0.0185104	0.0101654	0.599729	1	0.0103821	0.0247718	0.0110402	0.0136087	0.00896012	0.0466958
Tmem163	0.0301877	0.0123927	0.00646176	0.00438905	0.00293515	0.00386619	0.00773892	0.109614	1	0.0231807	0.275348	0.026253	0.0100309	0.0054077	0.00626706
Rcan2.1	0.0143257	0.00481458	0.140362	0.0539926	0.00155196	0.00577792	0.014976	0.780619	1	0.00811554	0.00195223	0.0753996	0.00238295	0.190254	0.00760702
AC078895.1	0	0.00306425	0.00354121	0.0402679	0.00807983	0.0495014	0.405538	0.323607	1	0.00332223	0.00737225	0.0130966	0	0.00627403	0.016689
Wscd2.1	0	0.00156483	0.00320564	0.00185253	0.00151725	0.0303675	0.198707	1	0.821233	0.00618842	0.00796229	0.00944481	0.00550471	0	0.00366022
Malrd1.1	0.011024	0.00589247	0.00401619	0.00778717	0.178206	0.1604	0.00580772	0.499305	1	0.00384875	0.00435034	0.00640092	0.00988733	0.0112654	0.0634096
Bmp8a	0.00674482	0.0143531	0.0413703	0.0104931	0.0119795	0.0124583	0.0447748	0.838816	1	0.00983262	0.0104563	0.0176777	0.0313356	0.00665812	0.00685662
Kctd16	0.00891596	0.0103055	0.00715283	0.0129506	0.0131251	0.0104853	0.0179325	0.980138	1	0.0119781	0.0059457	0.0118982	0.00552436	0.00400109	0.00568872
X9130008F23Rik.1	0.0125204	0.00244044	0.0394452	0.00116279	0.000360031	0.00601342	0.241243	0.755881	1	0.0240001	0.00508197	0.0656267	0.18158	0.00934732	0.00249802
Tmem117.1	0.00310706	0.00103963	0.00366255	0.0309551	0.0452965	0.0806857	0.0851332	0.545434	1	0.00392212	0.000641811	0.00438156	0.0100392	0.00629712	0.0598663
Rtl4	0.00090623	0.00209328	0.00247426	0.0589474	0.130883	0.0139883	0.00237122	0.177483	1	0.00276072	0.00111625	0.00537487	0.00436064	0.00234078	0.0645815
Oxgr1.1	0.00817888	0.00191267	0.000526999	0.0121862	0.0641899	0.0919174	0.00740772	0.77789	1	0.00433848	0.00296628	0.00734734	0.00304788	0.00945226	0.0264417
Atp6v0d2.1	0.00281289	0.00130568	0.00243838	0.0398807	0.0195271	0.0138009	0.00769126	0.733182	1	0.00280768	0.00206242	0.00634672	0.00223362	0.00304224	0.0106105
Syn2.1	0.00954142	0.00903419	0.0040312	0.00475945	0.0712966	0.0292968	0.0169445	0.563432	1	0.00903294	0.00104204	0.0211499	0.00167154	0.00272517	0.0387128
Foxi1.1	0.00938057	0.0046489	0.00502237	0.00389018	0.00324837	0.0357735	0.0218055	0.87074	1	0.0119195	0.00624632	0.0127395	0.0142869	0.0105547	0.00429332
Trpc5	0.00349985	0.0125606	0.00429943	0.0254687	0.0334556	0.00980897	0.00924087	0.11789	1	0.0101722	0.00668736	0.00520955	0	0.0022707	0.0469391
Atp6v1c2.1	0.00391134	0.00114683	0.00309716	0.0197134	0.0178965	0.0246972	0.00653784	0.675617	1	0.00373932	0.00151866	0.00298116	0.00335146	0.00356189	0.0106294
Atp6v1g3.1	0.00646514	0.00447563	0.00809453	0.0047595	0.00464309	0.0280219	0.0226136	0.660911	1	0.00925172	0.00840225	0.00782053	0.00416428	0.0048559	0.00412545
Col24a1	0.00948529	0.00858288	0.0114407	0.00808819	0.0608301	0.00847384	0.0116872	0.132247	1	0.0313881	0.00174374	0.0697992	0.0355741	0	0.0579896
Syt7	0.00327357	0.0111735	0.00792352	0.00721269	0.0240684	0.0391515	0.0184005	0.0253889	1	0.0935353	0.00551653	0.015896	0.0025987	0.0177651	0.0109206
Avpr1a	0.0062111	0.00286882	0	0.00803299	0	0.0174272	0.0130852	0.50857	1	0.00276183	0.00252251	0.0559436	0	0.0281901	0.00594132
Cacna1e	0.00690117	0.00726033	0.00317893	0.00450308	0.00522295	0.00223508	0.016449	0.0387224	1	0.00673029	0.0609667	0.00404044	0.00395539	0.120814	0.000749054
Aldh1l2	0.0181972	0.0128789	0.00403169	0.00331252	0.00470138	0.011445	0.0166731	0.0127367	1	0.00393769	0.00463208	0.0149234	0	0.013829	0.00639805
Gm12121.1	0.00601592	0.000190999	0.00200166	0.000377414	0.00103896	0.00124713	0.00143722	0.68968	1	0.0027305	0	0.00167457	0	0	0
Hepacam2.1	0.00162819	0.00155301	0.000972403	0.00217878	0.00194761	0.00761489	0.00575675	0.416435	1	0.00259945	0.0036061	0.00306791	0.00953569	0.0048151	0.000617772
Rp1	0.00472187	0.00596556	0.00439294	0.00675528	0.0040205	0.00352735	0.00590587	0.0405345	1	0.0152455	0.00253328	0.00273516	0.00234572	0.00809408	0.00531747
Slc4a9.1	0.00184975	0.000610061	0.000462765	0.00973513	0.00719121	0.00613752	0.002915	0.239926	1	0.00205591	0.000778519	0.00186823	0.000635972	0.000678428	0.00225986
Lsamp	0.00239603	0.00256854	0.00260402	0.00306859	0.00412891	0.00262311	0.0033618	0.0324294	1	0.00282314	0.0198015	0.00589451	0.00401511	0.00369779	0.00342684
Insrr	0.00171719	0.00198342	0.00335839	0.00351363	0.00588606	0.0116924	0.0124965	0.0370302	1	0.00167627	0.0029144	0.015506	0.0081247	0.0100048	0.00931375
Hmx2	0	0.00132282	0.000474197	0.00101018	0.00192018	0.00635132	0.0107572	0.0124758	1	0.00203079	0.00309713	0.00340726	0	0	0
Slc26a4	0.000402205	0.000649982	0.000227192	0.000316553	0.000235017	0.00225168	0.0036587	0.00923365	1	0.000523229	0.000328456	0.000897124	0.000246919	0	0.000566908
Mapk12	0.176546	0.00950013	0.0955299	0.0136791	0.0109281	0.0158809	0.0944129	0.108492	0.030688	1	0.0173886	0.121624	0.248363	0.0472712	0.018456
Sema4c	0.0609598	0.00973471	0.0581168	0.0156857	0.0207947	0.0239352	0.0217059	0.0299051	0.0203628	1	0.0612205	0.153332	0.0347613	0.105427	0.0512392
Cldn15	0.0180452	0.0131183	0.02503	0.0154275	0.0171361	0.0129616	0.0135825	0.00911894	0.0171733	1	0.0289522	0.292469	0	0.0297355	0.00692337
Cd93	0.0142838	0.00553761	0.00832581	0.00599823	0.0067031	0.0116666	0.0116996	0.00295048	0.00981509	1	0.203129	0.0332354	0.00369981	0.0054913	0.0180553
Ramp3	0.00553444	0.0148418	0.0103177	0.0354347	0.00926133	0.0190057	0.0621188	0.0203922	0.0102179	1	0.0265124	0.0533091	0	0	0.0104397
Jcad	0.0397234	0.009534	0.220682	0.00619805	0.00730611	0.00752414	0.0161519	0.00312904	0.0209683	1	0.0261135	0.187597	0.0811986	0.306808	0.0220198
Slfn3	0.0118454	0.00206452	0	0.00211159	0.0021349	0.00290594	0	0.0155357	0.00661697	1	0.232827	0.0341636	0	0	0.00882009
Tm4sf1	0.744724	0.00805	0.0184936	0.00959602	0.00989912	0.00783088	0.00999577	0.0142185	0.00504893	1	0.0253068	0.154615	0.0326067	0.0711954	0.0145709
Arhgap31	0.0144933	0.0106957	0.0245006	0.00480731	0.00471863	0.00666776	0.00768628	0.00606821	0.00525952	1	0.104954	0.120559	0.0140369	0.0187699	0.00672014
Kank4	0.00679437	0.00276081	0.0169527	0.0106959	0.0118251	0.0571147	0.107106	0.00389333	0.00230304	1	0.00536468	0.303325	0.179811	0.163131	0.0158213
Thbd	0.0208728	0.00604187	0.0309099	0.00842876	0.00299933	0.0048531	0.0417782	0.0111459	0.00280308	1	0.0443665	0.321471	0.0300997	0	0.0111414
Mcam	0.0299395	0.00673032	0.0158158	0.0235829	0.0133429	0.0126688	0.0153511	0.00950591	0.00184526	1	0.0240678	0.254176	0.0133751	0.0699257	0.00871892
Flt4	0.00474294	0.0205447	0.0133628	0.00625431	0.00861727	0.0139144	0.00802692	0.0148573	0.00491473	1	0.0273692	0.0339617	0.0254516	0.0428066	0.0125396
Rapgef5	0.0106569	0.00815116	0.0437119	0.0196808	0.00965931	0.00782758	0.048536	0.0413611	0.0116873	1	0.0201459	0.14513	0.0705931	0.0193083	0.02645
Eng	0.00761004	0.00539305	0.0126936	0.00642205	0.00653479	0.00658621	0.0225831	0.00723061	0.00943355	1	0.0559948	0.288872	0.0183033	0.0152563	0.00692036
Lepr	0.00552049	0.00407049	0.0107156	0.00486674	0.00312806	0.00493368	0.0101493	0.00708384	0.00336697	1	0.0139463	0.489274	0	0	0
Filip1	0.367673	0.0059907	0.0069471	0.00882682	0.0261474	0.0292072	0.00769995	0.0117589	0.0201538	1	0.0259598	0.121543	0	0.174441	0.0333294
Hspa12b	0.0124528	0.0156291	0.0132981	0.00964562	0.0117517	0.0184789	0.0107317	0.0231923	0.0294184	1	0.025082	0.0684083	0.0152771	0.00725741	0.00984675
Sema7a	0.0174085	0.00672823	0.0911991	0.0116182	0.00943773	0.00733147	0.00994892	0.00634863	0.0109684	1	0.0797526	0.0575516	0	0.0327133	0.0137344
Mmrn2	0.0268019	0.0123491	0.0263619	0.015828	0.0181907	0.0304924	0.0348149	0.0323885	0.0227597	1	0.0158913	0.0370176	0.0245814	0.0185011	0.0196572
Jam2	0.00291303	0.00839209	0.00915129	0.0179421	0.0104388	0.00707302	0.00587386	0.0172334	0.012165	1	0.0368909	0.107797	0.0376183	0.024852	0.0106817
Ldb2	0.0024773	0.00118475	0.00378209	0.00194241	0.00145948	0.00196841	0.00369358	0.00380289	0.00200884	1	0.00372283	0.52302	0.000280759	0.00636058	0.00075987
Calcrl	0.00875015	0.00215114	0.00262861	0.00342703	0.00175207	0.0044644	0.00476369	0.0060139	0.00279842	1	0.043954	0.344684	0.00137864	0.00967082	0.00194811
Icam2	0.0160254	0.00799549	0.00623651	0.00803275	0.00615456	0.00105208	0.013633	0.00643202	0.00563252	1	0.0809519	0.026239	0	0.00522868	0.0137759
Fabp4	0.0159965	0.00997666	0.0172679	0.011814	0.0109499	0.0128469	0.0105421	0.0135833	0.0102725	1	0.0408185	0.0350095	0.0152288	0.0181048	0.0070154
Meis2	0.0528043	0.00380925	0.00461513	0.00128333	0.00156938	0.00156639	0.00277715	0.00408804	0.00472451	1	0.00402657	0.398051	0.00153959	0.14893	0.000952363
S1pr1	0.0130964	0.00488004	0.00922557	0.00567669	0.00353437	0.00389003	0.00713383	0.00167706	0.00655662	1	0.0976874	0.0603373	0.0119375	0	0.0173439
Rgcc	0.00543791	0.00490041	0.0120735	0.0285637	0.00884538	0.00849323	0.00670427	0.0254839	0.0370525	1	0.0361258	0.0280882	0	0.0176577	0.00428064
Zfp366	0.0104359	0.00196215	0.00223656	0.00180565	0.00061253	0.00455939	0.00677641	0.00297631	0.00695012	1	0.142865	0.0155848	0	0.00822765	0.00363256
Plpp1	0.0508885	0.00448051	0.0227306	0.00943801	0.00869658	0.00613763	0.011822	0.00485384	0.00941645	1	0.0216028	0.172265	0.0160973	0.0145377	0.0151675
Pecam1	0.00785931	0.00518084	0.00742405	0.0055089	0.00568174	0.00736338	0.00561571	0.00713484	0.0144772	1	0.0861798	0.0171238	0.0120024	0.0171882	0.00587428
Sema3d	0.0101512	0.00911143	0.0130421	0.00660693	0.00807699	0.00847538	0.00787676	0.00881185	0.0147598	1	0.0126437	0.10684	0	0.00613286	0.00547997
Notch4	0.0192365	0.00758634	0.0056236	0.0105225	0.00780067	0.0092265	0.0106752	0.0089027	0.00685968	1	0.01989	0.0668637	0.00307598	0	0.00692418
Fam167b	0.0161714	0.00691083	0.0150541	0.00918173	0.00538258	0.0105965	0.00902006	0.0067756	0.00725737	1	0.0337625	0.0280936	0	0.00346071	0.00226329
Plvap	0.0120008	0.00689906	0.0140299	0.00813093	0.00806461	0.0096242	0.0105152	0.00629738	0.0152742	1	0.0224062	0.0458424	0.00958884	0.0125636	0.00801903
Fgd5	0.0077489	0.00228438	0.00615234	0.00211251	0.00273175	0.00604473	0.00642735	0.00438731	0.00400244	1	0.00777594	0.275421	0	0	0.00322396
Lama4	0.00670673	0.00207039	0.00618294	0.00389602	0.003549	0.0022025	0.00370067	0.00557049	0.00364011	1	0.00891911	0.256706	0	0.0144756	0.000655716
Rasgrp3	0.00536956	0.00295727	0.0235458	0.0104085	0.00911143	0.00448397	0.00702308	0.0148997	0.00783071	1	0.0387489	0.0192574	0	0.00551808	0.00317924
Sox18	0.0225351	0.00591098	0.00344149	0.00609207	0.00482401	0.00653127	0.00990493	0.00553009	0.0128554	1	0.0237166	0.0306185	0	0.00761287	0.00543816
Bcl6b	0.00737775	0.00558559	0.00858151	0.00324791	0.00573178	0.00761924	0.00464413	0	0.0125378	1	0.0177245	0.0750745	0.0139909	0.0171356	0
Grrp1	0.0223292	0.00524599	0.00927605	0.00879037	0.0103851	0.0055855	0.0150394	0.00369419	0.00492391	1	0.0178233	0.0100988	0	0.0302412	0.00217768
Erg	0.0177369	0.00529233	0.00780798	0.00584159	0.00519825	0.00505633	0.00599619	0.0127201	0.00344272	1	0.0233841	0.0359815	0	0.0117443	0.00438154
Arap3	0.00966824	0.00268709	0.00653061	0.00381964	0.00344504	0.00195663	0.0058971	0.00689776	0.00505977	1	0.0326032	0.0927507	0.00371681	0.0107836	0.00123116
Cd300lg	0.0141412	0.0047689	0.0124666	0.00520292	0.00221136	0.0107726	0.00262967	0.021083	0.00670536	1	0.0236111	0.035179	0	0.0150984	0
Ushbp1	0	0.00417135	0.0167988	0.0117616	0.0104564	0.0157924	0.0100284	0.0117878	0.00465243	1	0.00457235	0.0120026	0.0089924	0	0.0178407
Ednrb	0	0.00291914	0.00585745	0.00308955	0.00593068	0.0311895	0.0311461	0.0105733	0.00639509	1	0.0107821	0.0507055	0	0.00462336	0.0206814
Ptpru	0.00969052	0.00285581	0.00542005	0.00210808	0.00253535	0.0061877	0.00848501	0.00849423	0	1	0.0014564	0.0881589	0.445975	0.0237629	0.0112252
Rasip1	0.00406006	0.00462147	0.00606041	0.00693418	0.00691339	0.00743569	0.00836503	0.00781209	0.00217397	1	0.0195753	0.0153937	0.00696606	0.00739652	0.0103512
Arhgef15	0.0173011	0.00534957	0.00477346	0.00773415	0.00837146	0.00753791	0.0056897	0.00513519	0.0111708	1	0.00973914	0.0164944	0	0.00271546	0.00586848
Gja1	0	0.00209246	0.00488593	0.00259725	0.00160992	0.00713194	0.00387888	0.00615739	0.0060519	1	0.0158916	0.122747	0.0566479	0.0102823	0.00675469
Flt1	0.00450848	0.00218574	0.00690185	0.00392635	0.00332588	0.00323563	0.0022762	0.0028862	0.00340925	1	0.0483258	0.0271172	0.000763452	0.00469645	0.00394777
Tek	0.00498589	0.00526616	0.0055767	0.00689598	0.00523324	0.00710459	0.0063592	0.00817605	0.00947529	1	0.00787631	0.020865	0.0121773	0.0140467	0.00611703
Cdh5	0	0.00439211	0.00853842	0.00461848	0.00614657	0.00601343	0.0112941	0.00523699	0.00955498	1	0.0190569	0.0188242	0	0.0102923	0.00384505
Myct1	0.00642648	0.00488143	0.00939751	0.00463924	0.00192933	0.00923235	0.00568562	0.00729953	0.0100286	1	0.0179557	0.0103021	0.00943635	0.00766758	0.00566667
Emcn	0.00501365	0.00334181	0.00689067	0.00379861	0.00374282	0.00476188	0.00469524	0.0046512	0.00534074	1	0.00830787	0.0953238	0.00352714	0.00746548	0.0044484
Kdr	0.0136284	0.0038933	0.00399248	0.0042973	0.00202796	0.00325606	0.00691494	0.00293393	0.00391671	1	0.0214321	0.0196374	0	0.0237214	0.00229038
Nos3	0	0.00429463	0.00682176	0.00631308	0.00393888	0.0027919	0.00605332	0.00930882	0.00662929	1	0.0155905	0.00632866	0.00400584	0.0252167	0
She	0.0158394	0.00271504	0.00209195	0.00225753	0.00759681	0.00363517	0.00137797	0.00420774	0.00527992	1	0.0151638	0.0704596	0.0199547	0	0.00175332
Cd34	0.00946219	0.00383409	0.00800485	0.00440011	0.0054893	0.00549583	0.0085237	0.00537939	0.0070315	1	0.012433	0.0253998	0.00888396	0	0.00317279
Nova2	0	0.0058548	0.00268296	0.0033018	0.00357841	0.00531962	0.00325451	0.00408973	0.00916897	1	0.00412807	0.00675502	0	0.00509412	0
Tie1	0	0.00321547	0.00688564	0.00324075	0.00235679	0.000769861	0.00679223	0.0148012	0.00244415	1	0.0142659	0.018001	0	0.00521035	0.00363595
Robo4	0.0160261	0.00253536	0.00616929	0.00453788	0.00306109	0.00262735	0.00390359	0.00823919	0.00639968	1	0.01106	0.0144734	0	0.0237842	0.00598482
Ccm2l	0	0.00264782	0.00883697	0.00263055	0.00231382	0.000749054	0.00357006	0.0145059	0.00243951	1	0.00764773	0.00521619	0.0170918	0	0.00398659
D5Ertd615e	0.00540722	0.00229236	0.00460447	0.00205912	0.00458413	0.00339302	0.00337668	0.00209358	0.00290062	1	0.00818723	0.0118939	0.00168609	0.0108928	0.00395917
Ptprb	0.00925261	0.00206763	0.00717661	0.00265432	0.00192348	0.00291562	0.00358447	0.00218827	0.00297286	1	0.0077454	0.0114665	0.00741201	0.00551182	0.00133936
Cyyr1	0.00481215	0.00162207	0.00331896	0.00385132	0.00222313	0.0033079	0.00351195	0.00283902	0.00300787	1	0.00443005	0.0164433	0.000801108	0.0034237	0.00504295
Adgrl4	0.00515943	0.00164829	0.00572718	0.00286145	0.00173246	0.00306572	0.00342127	0.00438196	0.00582347	1	0.00701155	0.0101021	0.000610288	0.00531311	0.00171833
Exoc3l2	0.0019521	0.00190881	0.00135232	0.00229616	0.00267832	0.0045867	0.00251139	0.00445642	0.0030125	1	0.00354657	0.0120293	0.00752384	0.00503988	0.00212128
Tll1	0.00679682	0.00175177	0.00657958	0.00172723	0.00238351	0.00127017	0.00188157	0.00182424	0.00587422	1	0.00396871	0.00845299	0.00149933	0.0190166	0.00194596
Shank3	0.00314495	0.00091697	0.00286083	0.00261523	0.0020504	0.00322592	0.00245835	0.00219915	0.00221991	1	0.00426205	0.0150113	0	0.00533085	0.000334228
Ms4a6c	0.0159159	0.0152471	0.0255182	0.0169074	0.0141937	0.0160439	0.0185628	0.0218082	0.0164285	0.0536815	1	0.0704643	0.0251766	0.0121222	0.0235312
Ms4a6b	0.0181158	0.0140175	0.0202144	0.0161291	0.0190272	0.0131177	0.0212228	0.0303955	0.0285214	0.062136	1	0.0730917	0.0363582	0.0274981	0.0186307
Ly86	0.019438	0.0134056	0.0275638	0.0170864	0.0187587	0.0131711	0.0211538	0.0226372	0.0116152	0.0521411	1	0.0943273	0.0276138	0.0156698	0.0215191
Pirb	0.0360799	0.014077	0.0187065	0.0145812	0.0190894	0.0117616	0.0230266	0.0256881	0.0219889	0.0552436	1	0.0845521	0.0407852	0.0105216	0.0218742
Cd48	0.0703534	0.0122367	0.016819	0.0181663	0.0185593	0.0224802	0.0209581	0.0420215	0.0245007	0.0521045	1	0.074354	0.0196961	0.0341009	0.00146596
Itk	0.0112345	0.0097063	0.0231632	0.0228056	0.0227729	0.00944966	0.0195156	0.0571882	0.0196956	0.0636919	1	0.0897152	0.0288896	0.031814	0.0183902
Fgd2	0.00870523	0.00885829	0.0245653	0.0154779	0.0529396	0.0455219	0.0265653	0.0282075	0.0264796	0.0379902	1	0.0787061	0	0.0138588	0.0337
Slc9a9	0.0673309	0.00446612	0.0213733	0.00580339	0.00496857	0.00708081	0.0188329	0.0274852	0.245667	0.104505	1	0.125721	0.0947702	0.0876373	0.00311102
Csf2rb	0.0339903	0.0123262	0.0162241	0.0139857	0.00375082	0.015494	0.0144229	0.015639	0	0.0981459	1	0.0616777	0.0467861	0.0039295	0.0161045
Wdfy4	0.0232582	0.0120279	0.00449833	0.014346	0.00917823	0.00883257	0.0252231	0.0216278	0.00634544	0.0432681	1	0.131744	0.0049154	0.0393527	0.0152641
Itgal	0.0245636	0.0119218	0.0164519	0.0128764	0.0107422	0.0118789	0.0209698	0.0261778	0.0135818	0.0622505	1	0.0747191	0.0333814	0.0305366	0.0264513
Adgre1	0.0163361	0.0121112	0.0214717	0.017079	0.0107303	0.0104609	0.015434	0.0239193	0.0227188	0.0472938	1	0.0764194	0.0119671	0.0119399	0.0106074
Prkcb	0.0365979	0.0108704	0.0157754	0.0121022	0.0133665	0.0153464	0.0268822	0.0397567	0.0204309	0.0511989	1	0.0800434	0.0585277	0.0366149	0.0177675
Lair1	0.0190328	0.0108632	0.00930275	0.014256	0.0160218	0.0138797	0.0250588	0.014342	0.00636096	0.0511139	1	0.0775519	0.0179917	0.03257	0.0692392
Ccr2	0.0241731	0.0111132	0.0183053	0.0124341	0.012001	0.0138178	0.0206937	0.0275894	0.0148699	0.0607842	1	0.0764424	0.0148645	0.0287147	0.0164821
Cd84	0.0163438	0.0113255	0.0119495	0.0115277	0.0127299	0.0151269	0.0169454	0.0348014	0.0192994	0.0480494	1	0.0930473	0.0355937	0.0262683	0.0159273
Nckap1l	0.0246858	0.010695	0.0225551	0.0126203	0.0169951	0.0146332	0.0164207	0.0148023	0.0288739	0.0584414	1	0.0776721	0.0160239	0.00841091	0.0178299
Fyb	0.0139442	0.0108893	0.0195323	0.0156275	0.0122676	0.0202803	0.0275021	0.0203879	0.0162138	0.047664	1	0.059253	0.0332746	0.0159857	0.0180081
Arhgap30	0.0403489	0.0108389	0.00933996	0.0136698	0.0116444	0.0151081	0.0183431	0.0133373	0.0120528	0.0602078	1	0.0841333	0.0324268	0.00182314	0.0153805
Lrmp	0	0.00810213	0.0166496	0.0218208	0.0128917	0.00530352	0.0206679	0.0143078	0.00437116	0.0766266	1	0.0848183	0.0101029	0.0378521	0.00718588
Arhgap25	0.014061	0.00696791	0.0180784	0.00594138	0.00873098	0.0079965	0.0180126	0.0115157	0.0127998	0.176292	1	0.0745941	0.0227989	0.0105032	0.0147339
Pou2f2	0.00232773	0.0104418	0.0153497	0.01407	0.0117004	0.00946699	0.0236607	0.0205455	0.0122076	0.0569212	1	0.0795793	0.0336489	0.012816	0.0203405
Pira2	0.0265711	0.0125792	0.0144375	0.0145842	0.0139483	0.0124747	0.0107146	0.0137642	0.0143987	0.0401783	1	0.0580357	0.0213182	0.003179	0.00247575
Cybb	0.022902	0.0111042	0.0193514	0.0117306	0.0105404	0.0114143	0.0202593	0.0125305	0.0103357	0.0477796	1	0.0607469	0.0433776	0.0244403	0.0134446
Runx3	0.0107064	0.00859089	0.0114799	0.00953527	0.00881183	0.0133399	0.0156463	0.0236959	0.0198486	0.056078	1	0.115587	0.038163	0.0408149	0.0160429
Arhgap45	0.0135924	0.00724359	0.020041	0.00830101	0.0100279	0.0156648	0.0183176	0.0253252	0.0110359	0.0838036	1	0.0944553	0.0394938	0.0443257	0.0183774
Stat4	0.00757993	0.00742239	0.00780644	0.00851686	0.00847365	0.00866697	0.0320418	0.0217705	0.00560583	0.084912	1	0.096235	0.0793131	0.0155536	0.0118402
Il10ra	0.0312996	0.00834469	0.0124801	0.0101633	0.0128449	0.0121993	0.0289864	0.0187556	0.0166089	0.045963	1	0.0837101	0.093364	0.0267331	0.00639807
Syk	0.0284066	0.00603416	0.00523099	0.0079192	0.00830436	0.0161083	0.132913	0.0043571	0.0119458	0.0456717	1	0.0563137	0.0656541	0.0197164	0.00101534
Hck	0.0113416	0.0097683	0.0146997	0.0120307	0.0125807	0.0124082	0.018634	0.0156738	0.023899	0.0533025	1	0.0456732	0.0316699	0.0252018	0.0155144
Themis2	0.0192396	0.0111509	0.0232691	0.00875932	0.00618951	0.0117606	0.0151333	0.0247939	0.0145162	0.0386015	1	0.0605506	0.0174351	0.0509257	0.0116739
Klra2	0.0193047	0.0108373	0.0130816	0.0103889	0.00971476	0.0141298	0.0187401	0.00325529	0.00714319	0.0484558	1	0.0582514	0.0166442	0.0189859	0.0123883
Apbb1ip	0.0195442	0.00962448	0.0106564	0.00594327	0.0100853	0.00481198	0.0143428	0.00919149	0.0083469	0.0466107	1	0.133814	0.0203123	0.0061122	0.00735003
Vav1	0.00326406	0.00974772	0.023911	0.00998589	0.00550352	0.0142363	0.0246777	0.0112937	0.00808094	0.0670899	1	0.0432141	0	0.0326461	0.00941047
Slamf7	0	0.00966963	0.0292478	0.00797309	0.00575645	0.0172219	0.0219755	0.020412	0.0151764	0.0385304	1	0.0783617	0.0380239	0.0138159	0.0138887
Lcp2	0.0160471	0.00839414	0.0133207	0.00810262	0.00714057	0.0133156	0.0147733	0.0226821	0.0393336	0.0643321	1	0.0735717	0.0269886	0.0147012	0.0121525
Csf3r	0.0173596	0.008758	0.0171503	0.00923966	0.0124846	0.00445026	0.00697441	0.0143331	0.0168878	0.0745402	1	0.0603905	0.0442212	0.005155	0.00818319
Itga4	0.012731	0.00601875	0.0102989	0.0122755	0.0093572	0.0088684	0.0189692	0.0193866	0.00785559	0.063923	1	0.106755	0.0306466	0.0233133	0.0116464
Gpr132	0.00348	0.00610518	0.0145824	0.00890418	0.00698158	0.00736889	0.0219884	0.00931937	0.00376824	0.0497233	1	0.158854	0.0339954	0	0.0105846
Ccr5	0.0128562	0.00857199	0.0181198	0.0117379	0.0114407	0.0136831	0.0213972	0.017713	0.0114668	0.0398402	1	0.0570301	0.0216678	0.0149318	0.0197542
Ikzf1	0.0213725	0.00991602	0.0104346	0.00688739	0.00637803	0.0112764	0.0159461	0.0312293	0.00585659	0.0483667	1	0.0714231	0.0246237	0.0154904	0.00980958
Gm2682	0.00869361	0.00591667	0.0115181	0.00621496	0.00525308	0.00725677	0.0619652	0.0181919	0.0150478	0.0667242	1	0.0849977	0.0942232	0.0309797	0.0108245
Msr1	0.0267094	0.00905891	0.0133336	0.00956818	0.0100778	0.00852146	0.0117718	0.0193555	0.0145826	0.0611453	1	0.0487398	0.0169396	0.0223858	0.0106218
Klrk1	0.0097539	0.0078907	0.0229792	0.00739693	0.00934678	0.0137367	0.0163988	0.0307629	0.0127561	0.0569487	1	0.066749	0.032715	0.0129346	0.00959473
Card11	0.0133347	0.0078786	0.0106046	0.00795351	0.0048348	0.0163351	0.0204654	0.0262031	0.0148488	0.0481439	1	0.0831754	0	0.0331046	0.00810031
Slamf6	0.0087059	0.00640878	0.0147536	0.00696336	0.00283561	0.0131227	0.0208801	0.0266981	0.0377686	0.0600161	1	0.0972631	0.0188684	0.0206513	0.00420407
Btk	0.0123443	0.00837634	0.0122612	0.00870772	0.0111248	0.0127466	0.0188555	0.0131811	0.0181922	0.038229	1	0.0704328	0.00965712	0.0116715	0.0138345
Fam196b	0.016769	0.00680169	0.00196519	0.00631723	0.00802076	0.0152422	0.0116532	0.024371	0.117307	0.0360394	1	0.080907	0.0102698	0.0177243	0.00869139
Ikzf3	0.0352575	0.00579849	0.0137839	0.00654477	0.00952005	0.0121366	0.0199781	0.0258026	0.00220434	0.0568856	1	0.0964104	0.04126	0.019539	0.0134212
Il21r	0.0277141	0.00685486	0.00511679	0.00839215	0.00632292	0.00748056	0.0133062	0.0237716	0.0127589	0.0582906	1	0.0781061	0.0299478	0.011869	0.0217799
Nfam1	0.0423817	0.00765541	0.00867547	0.0106959	0.00640208	0.012705	0.0114245	0.00168419	0.00415393	0.0325479	1	0.083212	0	0	0.0162683
Tg	0.0173471	0.00628533	0.0116918	0.012195	0.0112978	0.00975784	0.022914	0.0526195	0.0182575	0.0332354	1	0.0396857	0.0391537	0.018609	0.0102029
Themis	0.00332511	0.00754377	0.00510765	0.00719058	0.00582617	0.00940594	0.0231333	0.0289243	0.00530546	0.0498203	1	0.0716272	0.0262645	0.00996215	0.00393758
Gm26740	0.0242816	0.00534821	0.0193047	0.00350687	0.00377604	0.00355035	0.025262	0.0120728	0.0137675	0.0784146	1	0.0968452	0.0329124	0.0275862	0.00459629
Grap2	0.0225543	0.00681283	0.00706989	0.00430245	0.00331953	0.00714484	0.0191286	0.0278541	0.00921214	0.0611338	1	0.0803186	0.0593661	0.0112896	0.00638068
Rhoh	0.0267719	0.00522885	0.0154303	0.00685118	0.00472538	0.00883278	0.0258642	0.0279851	0.0175316	0.0669338	1	0.0557915	0.0836239	0.0243118	0.00888529
Myo1f	0.0160783	0.00683517	0.00800221	0.00853183	0.00737929	0.0122452	0.0136831	0.0200782	0.0145125	0.0468972	1	0.0593929	0.0258917	0.00721348	0.00709246
Ptprc	0.0149497	0.0060046	0.00972413	0.00739504	0.00782692	0.00992131	0.0181527	0.0284045	0.0142581	0.0481347	1	0.0601743	0.0322165	0.0120668	0.0102276
Pik3r5	0.0116425	0.00467063	0.0133525	0.00595681	0.0032486	0.0067998	0.0158877	0	0.0268594	0.0736706	1	0.0724284	0.00821104	0	0.0134598
Cd226	0.00911318	0.00595517	0.0109698	0.00578847	0.00699944	0.00410214	0.00854055	0.0208004	0.00362835	0.0340853	1	0.0767874	0.0307245	0.0142338	0.00708312
Cd300lf	0.00847541	0.00717475	0.00922692	0.00636316	0.0095027	0.00335142	0.00918963	0.00439432	0.00787084	0.0257592	1	0.0452924	0	0.026107	0.00549834
Dock2	0.0126499	0.00394491	0.00667585	0.00453293	0.00462669	0.0102061	0.0143989	0.0188058	0.0165697	0.0477509	1	0.0713526	0.0206491	0.009997	0.00677581
Mir142hg	0.013897	0.00471378	0.0112493	0.00453788	0.00281781	0.00450305	0.0104029	0.0187042	0.00683624	0.0500306	1	0.0645511	0.0150066	0.0189918	0.00564495
Gm21188	0.0174936	0.00493922	0.0104008	0.0078946	0.00648691	0.00410087	0.00952866	0.00319672	0.0163995	0.0291979	1	0.0553431	0.00919862	0.00999533	0.00558058
Pik3ap1	0	0.00593144	0.00366931	0.00483883	0.0048783	0.00531268	0.00502153	0.00897722	0.0054015	0.0385676	1	0.0593892	0	0.0309135	0.000932366
Cd244	0.00270577	0.00476403	0.00447416	0.00425355	0.00621993	0.00655203	0.00485736	0.0289101	0	0.0444054	1	0.0473551	0.0280008	0	0.00284264
Gm44174	0.00661666	0.00300237	0.00652859	0.00470289	0.00500813	0.00493178	0.0189074	0.0207178	0.0139137	0.0397528	1	0.0624665	0.0778738	0.0168739	0.00226162
Gpr141	0.00922	0.00458895	0.0114692	0.00476162	0.00432837	0.00765949	0.010072	0.00438648	0.00738863	0.0380038	1	0.0424663	0.0129508	0	0.00886095
Gm2245	0.015151	0.00326806	0.0078351	0.00425184	0.00558187	0.00386137	0.0109498	0.00973485	0.00699466	0.0450986	1	0.039519	0.0044531	0.016388	0.000809101
F630028O10Rik	0.0327161	0.0034789	0.0100144	0.00364629	0.00211036	0.00561744	0.011347	0	0.00660267	0.0265595	1	0.0483016	0	0	0.00710216
Rgs5	0.00714186	0.0107054	0.023237	0.008072	0.00810988	0.020213	0.0193481	0.0148155	0.0123744	0.0251267	0.0513645	1	0.119116	0.0270125	0.00649984
Ccdc80	0.0491137	0.00826855	0.0429874	0.010746	0.0136193	0.0140283	0.0124007	0.0425216	0.0338014	0.0418238	0.022368	1	0.0135058	0.364731	0.0137075
Cyp1b1	0.160329	0.00463176	0.0076805	0.00614275	0.00498533	0.00885202	0.00189504	0.00469945	0.00620816	0.155893	0.0204933	1	0.0326665	0.522092	0.00223799
Vgll3	0.545139	0.00747941	0.0146244	0.00749681	0.00327628	0.00211404	0.0139306	0.0264691	0.00914511	0.00276446	0.0172096	1	0.486933	0	0.00886306
Bgn	0.0304913	0.00752634	0.0121573	0.00798019	0.00880023	0.00756268	0.0111073	0.0106184	0.00725173	0.109249	0.0364431	1	0.0080932	0.125222	0.00935455
Rem1	0	0.00336076	0.00871866	0.0031781	0	0.00260046	0.00191176	0.0155239	0.00425472	0.283633	0.0170159	1	0.0222197	0.0247788	0.00582284
Adgrl3	0.0109378	0.0136505	0.0349974	0.00905001	0.0108226	0.0130133	0.00822515	0.00361595	0.00726833	0.0157746	0.0202442	1	0	0.137817	0.00968812
Galnt17	0	0.0104654	0.00553801	0.0099625	0.014844	0.0127805	0.0742796	0.0339943	0.00520812	0.0101406	0.00756354	1	0.23953	0.0522973	0.0263591
Crlf1	0.0086523	0.00964854	0.0674519	0.00785193	0.0113978	0.0210873	0.0104949	0.00601578	0.0132331	0.0346472	0.027242	1	0.0468566	0	0.00656912
Cygb	0.0188764	0.00962003	0.00455054	0.00684634	0.0112166	0.0145664	0.0125927	0.005677	0.0110067	0.0442725	0.0332527	1	0	0.0394174	0
Cacna1c	0.00685259	0.00931754	0.0171917	0.0144535	0.0154822	0.0138767	0.0110893	0.0178207	0.0133124	0.019916	0.0170106	1	0.0111733	0.0120327	0.0147734
Col15a1	0.00772764	0.0037409	0.00224659	0.00804308	0.00719196	0.0346302	0.0112162	0.00317936	0.0120506	0.144083	0.019073	1	0.00225032	0.0127086	0.0118335
Adam12	0.000815509	0.00599795	0.00895007	0.0251823	0.0093479	0.0043655	0.00487508	0.00458287	0.00275559	0.0376697	0.0045086	1	0.0193579	0.0888463	0.074787
Dcn	0.0107696	0.00753321	0.0129428	0.0107275	0.0112586	0.00926455	0.00898969	0.0180846	0.0268696	0.0241121	0.0319189	1	0.0176835	0.00800074	0.00781471
Gucy1b1	0	0.00590205	0.00407868	0.00576472	0.00426424	0.0045122	0.140863	0.0224168	0.000920867	0.0109001	0.0192481	1	0	0.0464438	0.0147887
Col12a1	0.0120195	0.00738718	0.00356365	0.0230107	0.00527758	0.00378287	0.00480884	0.00499371	0.00137174	0.0153992	0.0126401	1	0.0079368	0.0757142	0.00438759
Mrc2	0.426495	0.0051995	0.0136282	0.00732534	0.011255	0.00828564	0.0100785	0.00375767	0.00784567	0.00902965	0.0151203	1	0.00732588	0.0208648	0.00443732
Lox	0.0254463	0.00832562	0.00865687	0.00654061	0.00469023	0.0080898	0.00724042	0.0336643	0.00621605	0.0180804	0.0310973	1	0.0166369	0.0290614	0.0077389
Fbln5	0.0106348	0.00627765	0.00751361	0.00711267	0.00635669	0.00658471	0.0112661	0.00404641	0.00443731	0.0931939	0.0166849	1	0.0129784	0.00886349	0.00211639
Col6a1	0.0114104	0.00732074	0.0164962	0.00616504	0.0107633	0.0104221	0.0137612	0.00559743	0.00739226	0.0260897	0.0270175	1	0	0.0691788	0.00275561
Gabra3	0.00158928	0.0104326	0.0078993	0.0105045	0.012088	0.0062529	0.0100687	0.00799095	0.00527686	0.00919121	0.00861221	1	0	0.0119759	0.00954972
Cfh	0.00546163	0.00371883	0.00540801	0.00357547	0.00309075	0.00412676	0.00676957	0.0115904	0.0376528	0.0181292	0.069345	1	0.0104487	0.0035292	0.00292576
Slco2b1	0.00574115	0.0133909	0	0.00222675	0.00267551	0.00369081	0.00479812	0.00421584	0.000774651	0.015682	0.0109612	1	0	0.00582766	0.00180266
Des	0.0370409	0.00608199	0.00109102	0.00790978	0.00803803	0.010949	0.0050887	0.0163052	0.00347192	0.0328999	0.0244165	1	0.0303008	0.0735428	0.00877493
Dnm3os	0	0.00185937	0.0418396	0.0216343	0.00527011	0.00179964	0.0310405	0.0136846	0.000803858	0.0533862	0.00386734	1	0.00243784	0.0209628	0.0020295
Cd248	0.0104227	0.00579464	0.00460145	0.00829379	0.00587014	0.0129083	0.010156	0.00913842	0.00667546	0.0169008	0.032116	1	0.0234825	0.0363808	0
Pde3a	0.606778	0.00123025	0.00454991	0.00152663	0.00137621	0.00173663	0.00319655	0.0007455	0.0017131	0.0410274	0.00451854	1	0	0.295464	0.00117449
Rerg	0.0684988	0.00207311	0.0024366	0.0305712	0.00529473	0.00314249	0.000504834	0.000968033	0.00124696	0.0326071	0.00735123	1	0	0.0185731	0.000935389
S1pr3	0	0.00481113	0.00434164	0.00691367	0.0061746	0.0326541	0.00655111	0.00506676	0.0339318	0.025274	0.0268965	1	0.0154048	0.0148795	0.00691608
Gpc6	0.011291	0.00660498	0.024364	0.00746152	0.00310166	0.00250485	0.00351068	0.00647096	0.02146	0.00416581	0.00437266	1	0.00660983	0.475945	0.0165955
Col6a2	0.0260793	0.00668886	0.00204519	0.00576117	0.00653191	0.0158866	0.00631118	0.00422824	0.0105526	0.0050086	0.0263994	1	0	0.0269999	0.0240062
Lhfp	0.00663718	0.00410308	0.109013	0.0040614	0.0133721	0.00432289	0.00822582	0.00567679	0.00362354	0.0329442	0.00739928	1	0.0480045	0.0720808	0.0110264
Col1a2	0.100883	0.00504255	0.00806316	0.00547091	0.00590436	0.00721137	0.00605817	0.008283	0.00655078	0.0167869	0.0228595	1	0.00827496	0.0110196	0.00581116
Srpx2	0.0123837	0.00400726	0.0609773	0.00540086	0.00310906	0.00548958	0.00826092	0.0140383	0.00192652	0.0285228	0.0207113	1	0.0258327	0	0
Col14a1	0.00560027	0.00445353	0.00490926	0.0085924	0.00762545	0.00453798	0.00603994	0.0158606	0.0347478	0.0146758	0.0209409	1	0.00674846	0.00589025	0.00378287
Fbn1	0.00623553	0.0030603	0.0109876	0.00487063	0.00837537	0.00745446	0.017772	0.00550686	0.00291136	0.0279566	0.016994	1	0.0100487	0.225756	0.0168971
Gucy1a1	0.00196528	0.00704202	0.00449986	0.0026612	0.000578439	0.00280692	0.00492604	0.00867661	0.00314174	0.00912297	0.0260834	1	0	0.00868835	0.00182795
Ltbp2	0.00716261	0.0066068	0.0125117	0.00325785	0.001925	0.00443653	0.00731631	0	0.00670717	0.0090117	0.0129753	1	0.0381494	0.133942	0.00387886
Col3a1	0.00874337	0.00499911	0.00487982	0.0056032	0.0047732	0.00601387	0.00664378	0.00613754	0.00551394	0.0161781	0.0230801	1	0.0076471	0.00391677	0.00588727
Ddr2	0.0106658	0.00604675	0.0120832	0.00543969	0.00443165	0.00528244	0.0052687	0.00257612	0.00922506	0.0204293	0.0110476	1	0.00357967	0	0.011819
Synpo2	0.00294957	0.00401179	0.036063	0.00996249	0.00634958	0.00148853	0.00515797	0.0127891	0.0011478	0.00451209	0.0108433	1	0.0284556	0.0905404	0.00799475
Gata6	0	0.00183637	0.00543831	0.0010306	0	0.00221342	0.00381847	0.00695642	0.0129879	0.117822	0.00745509	1	0.169083	0	0
Col5a1	0.0125599	0.00388424	0.00712778	0.00705146	0.00591046	0.00513514	0.00654922	0.00593628	0.00271945	0.0180591	0.0213389	1	0.0126266	0.0469093	0.00464931
Col1a1	0.00808865	0.00451289	0.00531886	0.00473097	0.00513692	0.00590703	0.00572113	0.00614657	0.00453598	0.0176544	0.0242061	1	0.00524785	0.00976175	0.00624353
Fndc1	0	0.00689306	0.00735081	0.00337775	0.00196053	0.00690413	0.00258901	0.00872877	0.00561542	0.00976376	0.0129291	1	0	0.0321559	0.00259838
Adamtsl1	0.00336267	0.00276659	0.0194351	0.0060783	0.00246381	0.00275268	0.00301414	0.00813547	0.00362015	0.0648051	0.00290495	1	0.00168093	0.0051118	0.00285901
Vstm4	0.160992	0.00308018	0.00586879	0.00476951	0.00445213	0.0109779	0.00214418	0.00213612	0.0045296	0.00763316	0.00698354	1	0	0.0990485	0
Adamts2	0.0246352	0.00369526	0.0211497	0.00678787	0.00547121	0.00130725	0.00322724	0.00259819	0	0.0113584	0.0147087	1	0	0	0.0127606
Mrvi1	0.00490517	0.005759	0.003069	0.00242103	0.00514954	0.00347701	0.00522069	0.00705565	0	0.00397546	0.0164834	1	0.00555732	0	0.00355688
Pdgfrb	0.160498	0.00324295	0.00364302	0.00292554	0.00192223	0.00111957	0.00532219	0.00264916	0.00157605	0.00795629	0.012674	1	0.00127337	0.0856874	0.0028758
Gm2163	0.012841	0.00289512	0.00486254	0.00890559	0.00475326	0.012285	0.00433185	0.00778674	0.00288698	0.0221539	0.0059844	1	0.00213091	0.00448945	0.00148051
Egflam	0	0.00466477	0.00528345	0.00412437	0.006755	0.00503797	0.0162744	0.00870589	0.0023353	0.0105871	0.00759049	1	0.00355091	0.00212719	0
Tmem45a	0	0.00297146	0.0093802	0.00372831	0.00386511	0.00788622	0.00186547	0.00599091	0.00950819	0.0343073	0.00939333	1	0.0315842	0.0103031	0.00247408
Gucy1a2	0.00409272	0.00350088	0.00833283	0.00502397	0.0023231	0.00288255	0.0254842	0.0039853	0.0010016	0.00413866	0.00494886	1	0.00819797	0.0537381	0.00351579
Gpr176	0.00283807	0.00291395	0.0202456	0.00627365	0.00194362	0.00173072	0.009682	0.0143869	0.0041634	0.00594052	0.00861366	1	0	0.0214559	0.00591805
Ednra	0	0.00367767	0	0.00299538	0.00424868	0.00758846	0.00314856	0	0.0257909	0.00547354	0.00741982	1	0	0.0882315	0.00939169
Svep1	0.140206	0.00303174	0.00369646	0.002535	0.000503338	0.000985244	0.00270259	0.00248711	0.0012761	0.00581051	0.00702347	1	0.00277865	0.0920613	0.000442941
Col6a3	0.00470097	0.00334419	0.00517771	0.00350338	0.00192107	0.00450314	0.0036295	0.00371448	0.00289417	0.0118011	0.0149771	1	0.00887306	0.00423551	0.00192755
Lama2	0.00210473	0.00334437	0.00194323	0.00407038	0.00458531	0.00747417	0.00784801	0.00278448	0.00481887	0.00368065	0.00577444	1	0.000376669	0.0268558	0.00518269
Pdgfra	0.00766346	0.00298121	0.0049963	0.00318903	0.00299886	0.00320667	0.00598088	0.0115392	0.0061166	0.0123184	0.00861373	1	0	0.00260262	0.00230701
Prrx1	0	0.00197236	0.00226702	0.00419744	0.00169305	0.00105378	0.00374647	0.00725937	0	0.00318408	0.0144045	1	0.0062503	0.034091	0
Frem1	0.0370478	0.00182458	0.00452758	0.00672323	0.00198635	0.00209277	0.00312945	0.00882832	0.000908898	0.0041887	0.00398322	1	0.00445242	0.00434289	0.00569395
Alx1	0.00411451	0.00202949	0.00525454	0.00379193	0.000928493	0.00375559	0.00663952	0.00595792	0.00144335	0.00755572	0.0096407	1	0	0.00740661	0.00279624
Gria4	0.00348771	0.00334461	0.00374879	0.00321077	0.00235159	0.00194344	0.00390486	0.00325095	0.00456079	0.0029868	0.00344702	1	0.00173552	0.0061287	0.0020473
X4930578G10Rik	0	0.00212155	0	0.00298778	0.00425177	0.00330497	0.0100085	0.00473252	0.00207832	0.014699	0.00231209	1	0.00505217	0.00229517	0.00707422
B3galt1	0.00385026	0.00140685	0.00113817	0.00192863	0.00152052	0.00139718	0.00268352	0.00160379	0.000484728	0.0363165	0.00372807	1	0.00401727	0.040296	0.00189375
Dclk1	0.00284714	0.00189788	0.00130675	0.00317921	0.0039839	0.00335014	0.00138052	0.00272017	0.00377373	0.00489776	0.00937671	1	0.00312538	0.0273167	0.00316141
Kcnt2	0.00351376	0.00329848	0.00178457	0.00152489	0.00158854	0.00190082	0.00295886	0.00096023	0.00299008	0.00551307	0.00484281	1	0	0.00243342	0.00223949
Csmd1	0.00176547	0.00281456	0.00288366	0.00296348	0.00280197	0.00288638	0.00380538	0.00285232	0.00371644	0.00319776	0.00214528	1	0.00197188	0.0151155	0.00154366
Carmn	0.0254795	0.00062558	0	0.000244446	0	0	0.00171772	0.00533439	0.0022278	0.013911	0.000711569	1	0	0.121019	0
Rab27b	0.00672097	0.00907012	0.0739479	0.087253	0.162457	0.0936538	0.0663696	0.0271069	0.0448487	0.0136112	0.0167721	0.332268	1	0.0578101	0.163296
Cdh13.1	0.00432302	0.00964342	1	0.0111258	0.00868736	0.0118152	0.015405	0.00471412	0.0129351	0.302047	0.00738649	0.135769	0.664364	0.00873373	0.0049285
Anxa1	1	0.0112243	0.117024	0.0239977	0.0183762	0.0329533	0.149306	0.0220112	0.0226544	0.527132	0.151511	0.443712	0.857197	0.128171	0.0317074
Piezo2	0.00304857	0.00351028	0.0392188	0.00429203	0.00387506	0.00489576	0.00785289	0.0183419	0.00447728	0.454013	0.00781282	1	0.666477	0.0384696	0.00331636
Col4a6.1	0.181057	0.0202243	0.503338	0.103774	0.0580355	0.0329063	0.131333	0.0884877	0.0218824	0.0489385	0.00235998	0.0468375	1	0.602789	0.104579
Anxa3	0.486042	0.029024	0.137254	0.0187069	0.0541089	0.0613362	0.0165696	0.0306663	0.0974408	0.532831	0.0917154	0.114495	1	0.382026	0.0485592
Gata3.2	0.0132143	0.00326088	0.00495512	0.00507	0.253299	0.38831	0.810813	0.382786	0.268052	0.014436	0.0509791	0.037228	1	0.00200871	0.195589
Emp2	0.176252	0.0184767	0.258747	0.0379304	0.0804466	0.15472	0.2222	0.210746	0.125926	0.0618428	0.0131415	0.230279	1	0.129119	0.0881125
Snx31	0.304208	0.0104029	0.00362026	0.00219387	0.000738472	0.00411428	0.00247984	0.0104802	0.00263635	0.00213333	0.00176738	0.0374383	1	0.0207208	0.00653044
Foxq1	0.00890777	0.0263784	0.0852445	0.061996	0.00826647	0.0483265	0.239457	0.133632	0.122385	0.0143694	0.00818935	0.0196429	1	0.004444	0.0263197
Sfn	0.0204199	0.0156907	0.121539	0.0637375	0.0215251	0.117141	0.111675	0.0381875	0.0393171	0.0293214	0.0446238	0.0144705	1	0.0423807	0.0508853
Krt18.2	0.017003	0.00726793	0.141123	0.0201513	0.0262044	0.417503	0.606028	0.0593812	0.0947735	0.0154843	0.0148499	0.014266	1	0.0365246	0.0860343
Itgb4	0.00458537	0.00993761	0.134338	0.0357936	0.0382088	0.028575	0.174878	0.28419	0.203546	0.035586	0.00306361	0.010084	1	0.0403646	0.0779384
Gm13256.2	0.024902	0.00408247	0.0068029	0.00562408	0.1266	0.301485	0.90264	0.294541	0.158264	0.0190821	0.0458157	0.0252042	1	0.00324123	0.107101
Sorcs2	0.0145236	0.0214585	0.0152387	0.019881	0.0095653	0.00777143	0.0122351	0.00289743	0.00142337	0.0296174	0.00928766	0.132189	1	0.321828	0.00681867
Efnb2	0.0264223	0.0107699	0.0177761	0.0104867	0.00573434	0.0689174	0.373577	0.128911	0.0577603	0.501939	0.0152627	0.143673	1	0.358426	0.0308047
Styk1.1	0.00845352	0.0142868	0.0537017	0.0110949	0.0148274	0.0927781	0.86763	0.0809501	0.0319203	0.0255634	0.0508535	0.0677226	1	0.598108	0.046501
Abcc3	0.0356743	0.0146686	0.0504683	0.015369	0.0264111	0.0288729	0.0959914	0.183716	0.0478293	0.0328955	0.295856	0.0345779	1	0.0363027	0.011563
Klf5.1	0.00882844	0.0282157	0.28588	0.0210228	0.00995541	0.0262549	0.273125	0.177191	0.0143963	0.00987375	0.00989693	0.0356991	1	0.0230332	0.02181
Pdlim1	0.0439894	0.00859013	0.00841857	0.00951341	0.133382	0.0938632	0.0144729	0.0124027	0.00485276	0.0792233	0.0717365	0.736449	1	0.0418999	0.106537
Slc14a1	0.0120563	0.00333292	0.00805739	0.00230694	0.00133974	0.000742923	0.0303976	0.00260686	0.00949264	0.537366	0.235555	0.0243669	1	0.00481801	0.0063717
Itga2.1	0.296459	0.0114184	0.0469596	0.0120412	0.023916	0.020847	0.412086	0.0123831	0.0962792	0.0461745	0.0651946	0.162565	1	0.0492397	0.00770911
Pdpn	1	0.00760944	0.1705	0.0214951	0.107833	0.0248688	0.0628521	0.0110652	0.00572817	0.0100773	0.00883788	0.036163	0.85696	0.423356	0.0621812
Sidt1	0.0098622	0.00523859	0.0108046	0.00385434	0.0026157	0.0101138	0.017823	0.0152781	0.00213331	0.0293997	0.403244	0.0217551	1	0.00868203	0.00883465
Tbx3.1	0.00305334	0.00235758	0.00507576	0.00228477	0.00208628	0.00584026	0.721074	0.1328	0.0375929	0.165963	0.00741766	0.124885	1	0.00982579	0.0139212
Bace2	0.00861485	0.00425409	0.0215802	0.00885756	0.0192284	0.0103563	0.0133227	0.0742642	0.067877	0.531401	0.00941518	0.123258	1	0.109219	0.00898211
Sdc1	0.0143347	0.00758692	0.0183645	0.0471204	0.0146877	0.0805343	0.10028	0.0646637	0.0329814	0.0138242	0.0133487	0.159416	1	0.0743542	0.0553586
Bmp3	0.0271339	0.00255933	0.141417	0.0259309	0.00290065	0.0104024	0.451199	0.0256238	0.0287052	0.00449718	0.0019624	0	1	0.54832	0.0129143
Wnt4.1	0.057447	0.00584984	0.0530118	0.00601636	0.0126803	0.0398355	0.426623	0.0363958	0.0705744	0.0166224	0.0153882	0.0790453	1	0.00209777	0.00883194
Eya2.1	0.00611613	0.00314571	0.0674014	0.00547472	0.00481381	0.00368266	0.0256478	0.603341	0.0115818	0.00675977	0.0323322	0.264107	1	0.357509	0.00219911
Pof1b	0.00581289	0.0013462	0.0185546	0.079184	0.00278264	0.00315969	0.0338741	0.373958	0.0236529	0.0049508	0.00181783	0.00402516	1	0	0.0227801
Oit1	0.0130387	0.00962633	0.0709521	0.0233299	0.0247979	0.0543021	0.239133	0.00595732	0.019267	0.00368108	0.00447393	0.00370052	1	0.0031061	0.0313586
Ano1	0.00561697	0.00378293	0.226098	0.00272266	0.00144515	0.0123215	0.0299486	0.026553	0.00228925	0.0128296	0.00335712	0.45815	1	0.174487	0.00769279
Gsto1	0.0100815	0.00999596	0.011911	0.0389008	0.0271547	0.0328569	0.0142263	0.0174974	0.0252385	0.0215293	0.0340594	0.0278733	1	0.00628719	0.0284003
Jag2	0.00989638	0.0044329	0.0684352	0.00662641	0.00408075	0.00847198	0.0145364	0.036319	0.00460928	0.362022	0.00860543	0.0048091	1	0.0221252	0.0249906
Tnfrsf19	0.0220394	0.0027368	0.0125962	0.00404055	0.0015716	0.00180258	0.411251	0.0137797	0	0.0705705	0.00348255	0.0532704	1	0	0.00651466
Mmp15	0.00573207	0.007313	0.0254594	0.0182442	0.0179078	0.00589987	0.00956287	0.0307694	0.0378069	0.139094	0.00392418	0.0134726	1	0.0198483	0.00614022
Gsta4	0.127743	0.0064469	0.00758806	0.018937	0.0295659	0.0533659	0.0147581	0.0155952	0.022148	0.0090259	0.00661825	0.0244126	1	0.0230915	0.0168289
Cers3	0.00602087	0.0112567	0.0273163	0.0148067	0.0175122	0.0049952	0.0516367	0.00660272	0.0292793	0.00777685	0.000749939	0.0269618	1	0.115788	0.00786417
Adh7	0.0211546	0.0153218	0.0078454	0.000594833	0	0.00668629	0.0284698	0.00173102	0	0.00337307	0.00114524	0.00128179	1	0	0.00448984
Plch2	0	0.00586251	0.053875	0.00481345	0.0018321	0.00712227	0.0467283	0.16317	0.0311872	0.00149248	0.00354718	0.00513525	1	0	0.0320189
Psca	0.00194028	0.00231036	0.214972	0.00523403	0.00240523	0.00206205	0.00286194	0.00410196	0.00216269	0.00476368	0.00167964	0.00476514	1	0.00326536	0.00409617
Clca3a2	0.00850465	0.00160651	0.00757124	0.0155711	0.000565711	0.000870912	0.06066	0.0240202	0.00838735	0.0018402	0.00433181	0.00273283	1	0	0.00649953
Krt19.1	0.00279887	0.000896528	0.00810598	0.00133183	0.00146815	0.0321672	0.0834953	0.000755697	0.00353934	0.00132316	0.00237284	0.00149935	1	0.000293284	0.0100299
S100a14	0	0.00101523	0.0288135	0.00293486	0.00165503	0.00873427	0.0740749	0.00542861	0.00643264	0.00387204	0.000879974	0.00485985	1	0	0.0120462
Tmprss13	0	0.00044238	0.0392186	0.000818795	0	0.00168031	0.0533205	0.0705531	0.0156675	0	0.00734864	0.0109376	1	0	0
Slc39a4	0.00806587	0.00434109	0	0.000513544	0.00254772	0	0.00853042	0.00166037	0.00888248	0.00207796	0.0174614	0.00853602	1	0	0.00689627
Gabrp	0.0115079	0.00164669	0.00486536	0.00929892	0.00966015	0.0197638	0	0.00544686	0.00358343	0.00413059	0.0028659	0.0046394	1	0	0.0236734
Cbr2	0.00496795	0.00112761	0.00543053	0.000976053	0.00159451	0.00328177	0.00552776	0.158988	0.00188487	0.00539554	0.0075661	0.000603545	1	0	0.00361759
Sprr1a	0.00276512	0.00259655	0.00470383	0.00859529	0.00198579	0.0022276	0.00237361	0.00320749	0.0120748	0.00296029	0.0045733	0.00290264	1	0.00258782	0.00145347
Ttc6	0.0118329	0.0039779	0.00654415	0.00356409	0.000762319	0.00166911	0.00798974	0.000938757	0	0.00108608	0.00247055	0.00564317	1	0	0.00617503
Syt8	0	2.7474e-05	0.00797361	0.00943846	0.0054698	0.00655794	0.032154	0.00082279	0	0	0.000994112	0.000478261	1	0	0.0104497
Fat2	0	0.00404967	0.00768801	0.00214653	0	0	0.00206844	0	0	0.000443249	0.00216265	0.00315293	1	0	0
Ly6d	0.00242499	0.00152901	0.00149117	0.00256329	0.00290852	0.00121261	0.00162244	0.00104285	0.00109871	0.00269073	0.0113584	0.0035342	1	0	0.000409742
Serpinb5	0.0074336	0.00186437	0	0.00546668	0.00249705	0.00275578	0.000804218	0	0	0	0.00167998	0	1	0	0.00583315
Gsdmc3	0.00177481	0.000355953	0.00131723	0.000412986	0.000452711	0.00153726	0.0184557	0.054221	0	0.00108924	0.000202465	0.00115814	1	0.000625395	0
Gsdmc2	0.000371194	0.000405843	0.000806375	0.000542993	0.000289868	0.000575093	0.0163621	0.0510429	0	0.000975672	0.000723787	0.000122546	1	0	0.000239728
Msln	0	0.000754778	0.00164572	0.000755775	0	0.00158379	0.0041857	0.00255135	0.00165728	0	0.0018339	0.0173275	1	0	0.00329797
Gm13219	0.00248668	0.000994626	0.00533027	0.00176921	0.00036582	0.000689457	0.0044115	0.00358157	0.00124326	0.00261964	0	0	1	0	0.000810001
Fxyd3	0.0070381	0.000560378	0.000821752	0.00203514	0.000559782	0	0.0032396	0.00780045	0	0	0.00226165	0.00278125	1	0	0
Upk3a	0.00371107	0.000769261	0.00197389	0.000898087	0	0.00371096	0.00410526	0	0	0.000125622	0.00302987	0.00115852	1	0	0.00302453
Anxa8	0.00209268	0.00101044	0.00124428	0.000340719	0	0.00176619	0.00266946	0	0	0	0.00345944	0.00470353	1	0	0
Sprr2a3	0.00731937	0.000647847	0	0.000231749	0.00143224	0.000384738	0	0	0	0.00107204	0.00276123	0.00174394	1	0	0
Foxa1	0.00297927	0.000529237	0	0.000439663	0	0.000576645	0.00522412	0.00455915	0	0.00135258	0.000216907	0	1	0	0
Upk1b	0.00108958	0.0003369	0	0.000273492	0.000142943	0.000486557	0.00151539	0.00125382	0	0.000461361	0.0013794	0.00118083	1	0.0107754	0
Trim29	0	0.000157151	0	0.000202325	0	0	0.00150521	0	0	0	0.00255163	0	1	0	0
Capn13	0.00620195	0.000382601	0	0.000133571	0	0.00028799	0.000755288	0	0.000218294	0	0.000317369	0	1	0.00411446	0
Krt5	0.00232555	0.000280245	0	0.000208135	0.00048344	0.000397805	0	0	0.000730095	0.00109177	0.000331663	0	1	0	0
Krt15	0.00673718	0.00017796	0.000295977	0.00017669	3.36117e-05	0.000593494	0.000175622	0	0	0.000428064	0.000908576	0.000167446	1	0	0.00121707
Krt14	0.00442757	0.000176327	0	0.000136414	0	0	0	0.00292993	0.0031672	0	0.000563188	0.00105623	1	0	0
Fstl1	0.090504	0.00512121	0.16631	0.0504201	0.0313417	0.0340284	0.0748097	0.0129247	0.0144413	0.287566	0.0271642	1	0.00960077	0.415199	0.0479807
Col4a6.2	0.181057	0.0202243	0.503338	0.103774	0.0580355	0.0329063	0.131333	0.0884877	0.0218824	0.0489385	0.00235998	0.0468375	1	0.602789	0.104579
Gm8126	0.0199802	0.115134	0.00936842	0.0182243	0.0121863	0.0104806	0.0114118	0.0137839	0.00397191	0.0127424	0.0067277	0.0113422	0.0124531	1	0.0170608
St3gal5	0.26292	0.0115137	0.0118138	0.011864	0.00301059	0.00571865	0.0120128	0.0104887	0.00735905	0.677257	0.614233	0.348587	0.140449	1	0.0447603
Cp	0.0210145	0.0963491	0.306212	0.0234692	0.0349568	0.0318883	0.0163271	0.0196459	0.0725645	0.028095	0.0340598	0.24365	0.299405	1	0.0253883
Cldn1	0.0815616	0.148283	0.0449671	0.0307977	0.0240067	0.0199179	0.0385337	0.0179611	0.0329271	0.0413409	0.0630963	0.0672621	0.0631359	1	0.0392755
Pxdn	0.553728	0.0583	0.0646644	0.0208009	0.0263277	0.069457	0.0120194	0.00207004	0.00965256	0.684447	0.0265626	0.803986	0.174948	1	0.0592447
Ccnjl	0.0271913	0.0312652	0.768473	0.0173184	0.00830636	0.0107595	0.218631	0.0174152	0.0216638	0.20602	0.0126234	0.0421725	0.320493	1	0.0153561
Slc24a3	0.0310481	0.0371659	0.0262961	0.0363086	0.0191133	0.0209289	0.0218828	0.0338704	0.0191282	0.537082	0.0630323	0.332205	0.0301321	1	0.088515
Clstn2	0.024598	0.0699619	0.104463	0.0147942	0.0131431	0.0112078	0.0139654	0.0156666	0.0133622	0.0164928	0.00455332	0.622063	0.00927709	1	0.0157464
Eya2.2	0.00611613	0.00314571	0.0674014	0.00547472	0.00481381	0.00368266	0.0256478	0.603341	0.0115818	0.00675977	0.0323322	0.264107	1	0.357509	0.00219911
Tnik	0.0305205	0.035911	0.147142	0.072159	0.0068978	0.0131613	0.0433489	0.0338826	0.00969957	0.0825329	1	0.238556	0.134169	0.897677	0.104388
Pgr	0.0165268	0.0352442	0.0554469	0.00407024	0.00275679	0.0298825	0.161815	0.492273	0.041545	0.252127	0.00716668	0.0777719	0	1	0.0165138
Prkg1	0.624153	0.0037241	0.00769327	0.00425753	0.00344509	0.00550233	0.00811632	0.0136981	0.0347234	0.349325	0.00708994	1	0.00786464	0.271646	0.0043735
Ankrd1	0.0434556	0.0162264	1	0.0195955	0.00650611	0.0170167	0.00561829	0.00888628	0.00868698	0.0266994	0.0123765	0.00361125	0.0494259	0.573082	0.00137523
Fbn1.1	0.00623553	0.0030603	0.0109876	0.00487063	0.00837537	0.00745446	0.017772	0.00550686	0.00291136	0.0279566	0.016994	1	0.0100487	0.225756	0.0168971
Osr2	0.0126065	0.0809234	0.762475	0.0118539	0.0206394	0.0147998	0.0176651	0.0289437	0.00986124	0.0091101	0.0208411	0.0261889	0.0181401	1	0.0197067
Sdk1.1	0.0181336	0.0367051	0.29915	0.0262461	0.141738	0.66866	0.480878	0.0490402	0.0707035	0.0319645	0.00918163	0.0446016	0.0930233	1	0.571986
Srgap1.1	1	0.00331952	0.00365949	0.0134309	0.0652527	0.0188462	0.00238532	0.0321333	0.045384	0.0439055	0.0015007	0.0205804	0.010674	0.122425	0.0324786
Fhl2	0.00441918	0.00734762	0.134437	0.036993	0.0055433	0.0150888	0.0163888	0.00825172	0.007265	0.0138715	0.0337583	1	0.0257664	0.342489	0.0169907
Plat.1	1	0.00620873	0.0619069	0.00351214	0.0043429	0.00691646	0.0185988	0.00250592	0.00371646	0.177396	0.00861009	0.0855206	0.0401854	0.140441	0.00338689
Ltbp3	0.141329	0.015273	0.170387	0.115293	0.143855	0.218493	0.13873	0.159127	0.111181	0.0684423	0.0245006	0.142664	0.197494	1	0.0891056
St6gal1.1	1	0.0105123	0.201979	0.00760724	0.00768215	0.358	0.30346	0.0689366	0.231542	0.111826	0.102745	0.134299	0.198362	0.612798	0.112843
Meis2.1	0.0528043	0.00380925	0.00461513	0.00128333	0.00156938	0.00156639	0.00277715	0.00408804	0.00472451	1	0.00402657	0.398051	0.00153959	0.14893	0.000952363
Lbp	0.020098	0.0287776	0.168812	0.0646753	0.0260679	0.0171125	0.0220168	0.0159852	0.0396336	0.312726	0.0371424	0.156063	0	1	0.0363915
Styk1.2	0.00845352	0.0142868	0.0537017	0.0110949	0.0148274	0.0927781	0.86763	0.0809501	0.0319203	0.0255634	0.0508535	0.0677226	1	0.598108	0.046501
Dkk3	0.0337674	0.0397986	0.0106899	0.00651818	0.00811289	0.015927	0.0298471	0.680469	0.858214	0.0219456	0.0260705	1	0.359801	0.910224	0.00895437
Cyp1b1.1	0.160329	0.00463176	0.0076805	0.00614275	0.00498533	0.00885202	0.00189504	0.00469945	0.00620816	0.155893	0.0204933	1	0.0326665	0.522092	0.00223799
Arhgap28.2	1	0.00219354	0.109523	0.0150231	0.00806687	0.0126106	0.0138006	0.0752952	0.0813987	0.0287897	0.00537053	0.058463	0.00382663	0.17706	0.00745208
Plce1.1	1	0.00924792	0.0500982	0.0401117	0.0044588	0.0149184	0.0223844	0.0447966	0.00202078	0.00967089	0.00250659	0.0254946	0.0675757	0.266427	0.0467419
Adgrg6	0.114643	0.0240937	0.159444	0.0265954	0.0183506	0.112149	0.334169	0.0271981	0.0312279	0.137841	0.0925264	0.0308864	0.622457	1	0.0698685
Nkain3	0.0312859	0.0168894	0.0090532	0.0369354	0.00922436	0.00553165	0.0061836	0.185869	0.0207954	0.00838875	0.00456303	0.05295	0.00876197	1	0.0186995
Pde3a.1	0.606778	0.00123025	0.00454991	0.00152663	0.00137621	0.00173663	0.00319655	0.0007455	0.0017131	0.0410274	0.00451854	1	0	0.295464	0.00117449
Cacna2d1	0.0277136	0.00573259	0.0163182	0.0383982	0.00725814	0.00663538	0.00637361	0.0167721	0.38479	0.00425649	0.00670569	1	0.0410456	0.436839	0.0308057
Ptchd4.1	1	0.00705197	0.0119131	0.00851158	0.00357078	0.00341644	0.00485865	0.00787485	0.00403479	0.00332523	0.00272523	0.0105909	0	0.385377	0.00907868
Gm11149	0.0355562	0.0386174	0.0743076	0.0171869	0.00945505	0.015369	0.0614497	0.0133019	0	0.0267255	0.00118007	0.202568	0.0123126	1	0.0318773
Cald1.1	0.0737182	0.00562888	0.132943	0.00387297	0.0038951	0.00493491	0.0187701	0.00981067	0.00378844	0.352947	0.0161528	1	0.0131359	0.450536	0.00330866
Pdpn.1	1	0.00760944	0.1705	0.0214951	0.107833	0.0248688	0.0628521	0.0110652	0.00572817	0.0100773	0.00883788	0.036163	0.85696	0.423356	0.0621812
Gpc6.1	0.011291	0.00660498	0.024364	0.00746152	0.00310166	0.00250485	0.00351068	0.00647096	0.02146	0.00416581	0.00437266	1	0.00660983	0.475945	0.0165955
Zbtb7c	1	0.0181128	0.00648593	0.0450215	0.0143836	0.00775553	0.00414283	0.00828746	0.105041	0.0837877	0.00321049	0.167439	0.0376709	0.645994	0.00874084
Fam19a1	0.0209221	0.00377014	0.00183225	0.00615257	0.00302696	0.00442849	0.00217268	0.067244	0.1897	0.00766078	0.00444909	0.515696	0	1	0.0047072
Ncam1	0.120468	0.0318878	0.0723373	0.0246905	0.0131835	0.0211762	0.0363751	0.00502964	0.00444849	0.00878313	0.00599542	0.298582	0.00691617	1	0.0555441
Adgrv1	0.0150465	0.0156274	0.290354	0.0848876	0.0085958	0.0108651	0.032319	0.0276369	0.051953	0.0109292	0.00908193	0.0392638	0.0269569	1	0.0209095
Scrn1	0.22748	0.00502171	0.269461	0.0741145	0.0023571	0.00656551	0.053212	0.0478591	0.0768252	0.0160197	0.0066745	0.0342982	0.00740223	1	0.0371035
Gli3	0.0117459	0.00475919	0.288174	0.0102983	0.0116489	0.0146376	0.0230185	0.00554102	0.00294516	0.32678	0.0085352	0.660619	0.362266	1	0.147377
Npr3.1	1	0.00144699	0.0027491	0.00200919	0.000821318	0.00178813	0.00174378	0.00504064	0.00114149	0.184502	0.00119239	0.0111889	0	0.316298	0.000417023
Timp2	0.723967	0.00885864	0.253157	0.0156582	0.00963177	0.0146692	0.171678	0.026071	0.0151418	0.0722998	0.13247	0.443767	0.587515	1	0.00444436
Cdh6.1	0.00625642	0.0262486	0.399261	0.0407888	0.0168711	0.00737533	0.00516578	0.00375543	0.00279743	0.00683354	0.00143264	0.0112587	0.00233132	1	0.0316707
Amph	1	0.0322692	0.0871373	0.00460952	0.003586	0.00416838	0.00179449	0.00310795	0.124952	0.00169573	0.0196185	0.00369022	0	0.858029	0.00649866
Tshz2.1	0.320169	0.00259648	1	0.00287984	0.00296312	0.00305928	0.00802838	0.00386037	0.00761593	0.426462	0.00938504	0.734417	0.0526147	0.679125	0.00263148
Gxylt2	0.00911042	0.0601753	0.0200719	0.00299934	0.007964	0.00689579	0.012629	0.00613534	0.00476548	0.0137186	0.00732098	0.107385	0	1	0.00301309
Loxl1	0.270136	0.0149915	0.0246647	0.0155626	0.0143793	0.00758941	0.00855666	0.0145168	0.00467763	0.0223611	0.0227642	1	0	0.904961	0.0185978
Gm26883.1	0.28183	0.0018805	1	0.00221772	0.00181313	0.00288794	0.00624339	0.000305421	0.0090471	0.387064	0.0070397	0.675131	0.034213	0.677138	0.000242609
Plekhh2	1	0.0113198	0.234332	0.0234854	0.00315601	0.00104116	0.0432947	0.0271606	0.00202237	0.0330029	0.00334191	0.24773	0.0203222	0.770809	0.0023714
Rnf150	0.883167	0.00301987	0.0180079	0.00682325	0.0141544	0.00182196	0.0350032	0.0152723	0.00400102	0.0122421	0.0449403	1	0.0874154	0.733646	0.00350023
Kirrel	1	0.00905663	0.13653	0.0149561	0.0070894	0.00571546	0.00518843	0.000365709	0	0.022032	0.00520023	0.579162	0.0954829	0.719444	0.0194024
Wt1os.1	1	0.00153443	0.00108941	0.000772676	0.00143168	0.000284688	0.000444513	0.000602604	0.00202298	0.00129856	0.000653941	0.0109885	0	0.272893	0.00167424
Wt1.1	1	0.0014923	0.000751763	0.000489911	0.000947786	0.00137828	0.000534616	0.000627114	0	0.00089355	0.000278013	0.0200504	0	0.284585	0.0013627
Foxd1.1	1	0.000421576	0.00246602	0.000941219	0.00209391	0	0.00058668	0	0.00267294	0.00189358	0.00114428	0.0265914	0.00584189	0.279719	0
Mark1	0.0339407	0.0323945	0.0230916	0.00170561	0.0010884	0.0221036	0.0504794	0.00641275	0.00487461	0.00431001	0.00242718	0.352849	0.0335441	1	0.0166507
C1qtnf7.1	1	0.00105961	0.00778302	0.00131174	0.00178334	0.00162561	0.00185709	0.00186409	0	0.0180296	0.00227465	0.205935	0	0.585963	0.000402412
Akap12.1	0.0214471	0.0133642	0.335158	0.011549	0.00888843	0.013288	0.0341425	0.00818996	0.00624849	0.0867732	0.00791968	0.108995	0.0270871	1	0.00866358
Eya4.1	0.823697	0.00657998	0.0169708	0.00455364	0.00545033	0.00420924	0.00543072	0.0133774	0.00182431	0.00531348	0.0260093	0.175087	0	1	0.00593122
Adamts5	0.0188644	0.0051827	0.0332647	0.00124997	0.00142077	0.00150075	0.00520925	0.00094863	0.000677705	0.0491815	0.00443167	0.492245	0.00103104	1	0.00183711
Tnc	0.00376449	0.00158139	0.00467219	0.0154169	0.00348103	0.00464172	0.00198603	0	0.00256272	0.00816639	0.00605307	0.377451	0.00408571	1	0.00437802
Stc2	0.00494263	0.0124423	0.0486867	0.00161085	0.00234951	0.00203332	0.0134344	0.00689681	0	0.00758842	0.00208821	0.0142503	0.0055333	1	0.00470211
Cacna1g	0.0162457	0.00500298	0.109808	0.00205343	0	0.00348899	0.00928397	0.00248168	0.00193454	0.00154846	0.00179928	0.032314	0.0247157	1	0.00459838
Kcnmb2	0.0114612	0.0052523	0.00238644	0.00542855	0.00461269	0.00681407	0.00407226	0.00408365	0.00464599	0.00464021	0.00230658	0.00538775	0	1	0.0123748
Gm45004	0.170453	0.00119711	0.00501371	0.00157901	0	0.000919436	0.00211273	0.00138212	0	0	0	0.00100872	0	1	0
Wnt16	0.0147589	0.000475883	0.0121175	0.000102571	0	0	0.000862356	0.00113683	0	0	0	0	0	1	0
C330027C09Rik	0.0751903	0.0397147	0.0293277	0.0209876	0.0204999	0.0140517	0.0295696	0.0366584	0.0249647	0.0758031	0.305423	0.165286	0.0511844	0.101502	1
Cenph	0.0203918	0.0535781	0.0333667	0.0132555	0.00913996	0.0388915	0.0293705	0.01028	0	0.0840314	0.238133	0.117574	0.11411	0.0509475	1
Aurkb	0	0.0270607	0.0157397	0.0202998	0.0172675	0.0207156	0.0466886	0.0100422	0.00567319	0.0739788	0.417333	0.14614	0.138217	0.0192628	1
Cep55	0.0210107	0.0208542	0.0318218	0.0101244	0.0120454	0.00867806	0.0217438	0.0166936	0.016819	0.112609	0.462263	0.175745	0.237326	0.0111447	1
Efcab11	0.00680104	0.0526041	0.0164292	0.0216391	0.0145497	0.0211877	0.0239973	0.0302456	0.0154631	0.0564308	0.215449	0.131092	0.0542973	0.0822769	1
Rad51ap1	0	0.0436153	0.0239946	0.0148776	0.0191854	0.0180824	0.0452714	0.0077538	0.023667	0.135941	0.255346	0.133343	0.135769	0	1
Bub1b	0.0558971	0.026122	0.0240876	0.0281868	0.0252149	0.024321	0.0313265	0.0345945	0.0133135	0.0705777	0.354209	0.139345	0.194856	0.0914389	1
Cenpp	0.0273753	0.0458039	0.0336192	0.0539019	0.043821	0.0374013	0.0394936	0.0430995	0.0370065	0.0564217	0.127829	0.123743	0.0453015	0.055286	1
Polq	0.0228941	0.042614	0.021703	0.0233849	0.0152073	0.0283187	0.0240144	0.0481526	0.0357835	0.0752437	0.246242	0.0983824	0.0493461	0.144406	1
Espl1	0	0.0277426	0.0143174	0.0211208	0.0126789	0.0117863	0.0326036	0.029035	0.0325878	0.0920405	0.370979	0.116708	0.0601458	0.0412759	1
Brca1	0.0260046	0.0548984	0.0211687	0.0153589	0.0180399	0.0251877	0.031046	0.0152239	0.0100821	0.054717	0.168399	0.0827665	0.0472483	0.0414733	1
Bard1	0.0167443	0.0369663	0.0306734	0.0208597	0.0262573	0.0232813	0.0184767	0.0852435	0.0295286	0.0871696	0.236778	0.101246	0.0618884	0.050112	1
Mki67	0.0102857	0.0208862	0.0127999	0.00987116	0.0210019	0.0200306	0.0183397	0.0135972	0.0082842	0.0672352	0.40586	0.133577	0.140627	0.0276081	1
Nusap1	0.0213918	0.0377932	0.0305701	0.0311939	0.0266632	0.0141527	0.0251045	0.0319452	0.0214301	0.068935	0.215022	0.117536	0.0859633	0.0317554	1
Kif18a	0.0570327	0.036528	0.045858	0.0494913	0.0446294	0.0312508	0.0338775	0.0532249	0.0315704	0.0545678	0.156177	0.0724402	0.0749617	0.0320763	1
Fanci	0.00677824	0.0484644	0.0184232	0.0186464	0.0134787	0.024333	0.0224214	0.0166349	0.00591721	0.056586	0.185687	0.0653188	0.167398	0.04914	1
Ndc80	0.0136165	0.0237881	0.0128304	0.0110205	0.0182324	0.0219069	0.0227583	0.0248052	0.00533754	0.109726	0.343896	0.136569	0.0924263	0.082856	1
Mybl1	0.0344325	0.0536142	0.0351752	0.0346621	0.0320437	0.0263701	0.0291496	0.0531556	0.0529709	0.0553108	0.065355	0.0853412	0.0330317	0.0763645	1
Kntc1	0.00746365	0.0427228	0.00730475	0.00931843	0.0101376	0.0227241	0.0357946	0.008452	0.00442314	0.0868559	0.216889	0.13118	0.118401	0.0508111	1
Knstrn	0.0357137	0.0366095	0.0321302	0.0154565	0.022977	0.0240348	0.0351637	0.036567	0.0240026	0.0960394	0.214744	0.119988	0.218093	0.0260092	1
Ncapg	0.0394314	0.026198	0.0145102	0.0136723	0.02059	0.0114546	0.0207497	0.0438666	0.0116912	0.0583489	0.314024	0.158024	0.110179	0.0673032	1
Dlgap5	0.0106861	0.0259752	0.0131898	0.013451	0.0199696	0.0187608	0.0197478	0.0216574	0.0173535	0.0650096	0.327883	0.129416	0.0947885	0.0335082	1
Pbk	0	0.0388968	0.0377787	0.0319235	0.0292629	0.0100496	0.0324766	0.0228286	0.0217197	0.0649569	0.175918	0.0869561	0.0624793	0.0464589	1
Fancd2	0.0157131	0.0363561	0.0635102	0.0228297	0.0136431	0.0268853	0.0481515	0.0854228	0.00900214	0.0368548	0.193504	0.108245	0.0648149	0.108127	1
Kif11	0.0169717	0.0212923	0.0136494	0.010237	0.0102309	0.0139956	0.0172353	0.00933292	0.0133387	0.0663889	0.337041	0.150961	0.102422	0.0135288	1
Melk	0.0188843	0.0310777	0.0428025	0.00953987	0.0263643	0.017619	0.0241885	0.0250837	0.00351036	0.0549801	0.240142	0.159711	0.167663	0.0214775	1
Ccnf	0	0.0219544	0.0281423	0.027241	0.0193877	0.028361	0.0369601	0.0367359	0.0258773	0.0608666	0.274156	0.104206	0.138685	0.0504477	1
Prr11	0.0313323	0.0209096	0.0276275	0.00847613	0.00966489	0.0107147	0.0466441	0.0130016	0.0293082	0.0938726	0.29416	0.174738	0.115594	0.152802	1
E2f7	0	0.0254456	0.0142818	0.0035144	0.000487314	0.0122311	0.020219	0.0210262	0.010296	0.319413	0.199129	0.147867	0.133315	0.133669	1
Cenpe	0.018148	0.0272282	0.0206818	0.00811128	0.0133068	0.00902542	0.0210012	0.0237199	0.018279	0.0699321	0.278221	0.137308	0.0794156	0.0542147	1
Aurka	0.0194159	0.0227554	0.0181523	0.019721	0.0322536	0.0279793	0.0332114	0.0600346	0.018462	0.0617859	0.253134	0.131344	0.17989	0	1
Anln	0.0211002	0.032339	0.0284052	0.025263	0.027547	0.0296467	0.0319507	0.0358655	0.034253	0.0605963	0.163974	0.135568	0.163021	0.0330239	1
Kif2c	0	0.0213386	0.00882344	0.0150754	0.0152779	0.014988	0.0228687	0	0.00883796	0.0902922	0.29822	0.133234	0.100501	0.041754	1
Diaph3	0.00706192	0.0229281	0.138077	0.00719238	0.0157475	0.0251627	0.177065	0.0080651	0.00477427	0.0825605	0.193719	0.139619	0.119739	0.0670611	1
Kif15	0.00654367	0.0232041	0.00755299	0.0105393	0.00986813	0.00937676	0.0122545	0.0314185	0.00595721	0.058351	0.306242	0.121456	0.11344	0.0258364	1
Ube2t	0	0.0302325	0.0200972	0.0250666	0.0138035	0.0202534	0.0299021	0.0640186	0.00988113	0.0693597	0.19189	0.115713	0.103436	0.0160918	1
Tpx2	0.0338336	0.0259173	0.0162042	0.0102847	0.0169083	0.0178913	0.0183316	0.0161446	0.0158511	0.0763146	0.242278	0.144912	0.06478	0.0460511	1
Cenpi	0.0220246	0.0258289	0.0166078	0.0125207	0.00582935	0.0107069	0.0173963	0.00672403	0.0076697	0.0750639	0.236303	0.157676	0.0482542	0.0579202	1
Clspn	0.00439278	0.0251645	0.000996238	0.00717195	0.0109521	0.0173745	0.0270403	0.0214342	0.00358749	0.0796274	0.252726	0.112491	0.139447	0.0432287	1
Parpbp	0.00537998	0.0223004	0.0162555	0.00983998	0.0162535	0.0102286	0.0208136	0.0175218	0.0168628	0.0529183	0.269011	0.13064	0.0878042	0.0331826	1
Ccdc18	0.0202336	0.0353533	0.0448165	0.0381653	0.0321235	0.0217223	0.0482103	0.0472103	0.0250946	0.0503743	0.0714938	0.0710947	0.0697753	0.0351764	1
Rad54b	0.00942642	0.0322843	0.0286692	0.0238348	0.0228235	0.0356697	0.0344874	0.00723956	0.0214128	0.0440245	0.140363	0.0814944	0.0831323	0.105493	1
Bub1	0	0.0191869	0.00388002	0.00634303	0.00741197	0.00394013	0.0377244	0.0306435	0.0101519	0.0521113	0.302878	0.0938718	0.129419	0.0759987	1
Kifc1	0.0107043	0.0345171	0.021683	0.0129096	0.0180513	0.0159887	0.0187448	0.0167942	0.0110113	0.0677674	0.158685	0.0999746	0.0214117	0.00925949	1
Neil3	0	0.0178337	0.00478223	0.00314515	0.00492788	0.00620455	0.00733374	0.0201594	0.000781203	0.0467282	0.326897	0.130359	0.0539608	0.0526333	1
Ska1	0.0381584	0.0254706	0.0194916	0.00789329	0.00479736	0.00171335	0.022756	0.0063655	0.00838633	0.0413004	0.229871	0.180647	0.0647739	0.0690788	1
Top2a	0.00516952	0.0216668	0.0114163	0.0098812	0.00931513	0.0111	0.0183316	0.0177139	0.00885296	0.0641919	0.258537	0.120542	0.0965655	0.0503422	1
Ckap2l	0.00998345	0.0180544	0.0126916	0.00884531	0.0147264	0.0118232	0.0222844	0.0180348	0.0130451	0.051038	0.267222	0.11753	0.174231	0.0475279	1
Sgo2a	0.0434332	0.0184343	0.0224886	0.0140835	0.0107596	0.00378047	0.0249377	0.0410358	0.00523271	0.081418	0.222213	0.1621	0.131239	0	1
Kif14	0.0171687	0.0136866	0.00570483	0.00901094	0.00268031	0	0.014564	0	0.00749442	0.067675	0.307554	0.123447	0.0922413	0.0373402	1
Prc1	0.00749788	0.0206089	0.0147564	0.00985832	0.0159363	0.00713587	0.0118427	0.00754038	0.00973206	0.0591963	0.211884	0.137754	0.114204	0.0712226	1
Ckap2	0.00835855	0.0329722	0.0170687	0.00642919	0.0183034	0.0119375	0.0148172	0.0157978	0.00313799	0.0689167	0.120613	0.113163	0.0793588	0.0258696	1
Nuf2	0.0129006	0.0177383	0.00712235	0.00963805	0.0106549	0.0146119	0.0168703	0.00963092	0.00779239	0.0514329	0.234086	0.134652	0.0960595	0.0390143	1
Ska3	0.0190018	0.023636	0.0213483	0.0204013	0.0134741	0.0103425	0.0236743	0.0236305	0	0.0503594	0.16399	0.0921261	0.0502757	0.0174771	1
Aspm	0.0197253	0.0178276	0.00845777	0.0121293	0.00692203	0.00339102	0.00753971	0.0126975	0	0.0586071	0.227398	0.12341	0.0554289	0.0362241	1
Cdca2	0.0109956	0.0212615	0.0165188	0.00495031	0.0109577	0.00834363	0.0184101	0.0085932	0.00325713	0.0382477	0.216798	0.105022	0.164754	0.0358082	1
Hmmr	0.00142416	0.0164922	0.00430138	0.00548301	0.00527729	0.00458309	0.0145941	0.0119263	0.00992562	0.0381667	0.236843	0.134737	0.174561	0.00381614	1
Lockd	0.00354529	0.0168245	0.0131186	0.0137028	0.0176737	0.0143406	0.0222103	0.0176333	0.0109045	0.0410122	0.206413	0.0995237	0.0944564	0.0298726	1
Kif18b	0	0.0155439	0	0.00500324	0.00338758	0.00860571	0.0294387	0.00264565	0	0.0509814	0.241233	0.104394	0.144337	0.0107729	1
Knl1	0.0215567	0.0186591	0.00827139	0.00646092	0.0039022	0.0083129	0.00942755	0.00923854	0.00348195	0.0418902	0.213254	0.0921831	0.0648168	0.0418035	1
Mis18bp1	0.0081527	0.0153924	0.00691397	0.0109001	0.0153577	0.0104872	0.013078	0.00753631	0.00561921	0.034531	0.219889	0.0687555	0.0519062	0.0582761	1
Kif4	0.0109112	0.0198093	0.00629912	0.00608154	0.0108195	0.0105352	0.016476	0.00668391	0.00420953	0.0574279	0.175651	0.0973618	0.0298611	0.0344785	1
Depdc1a	0.0083191	0.0107994	0.00712049	0.0028835	0.000999564	0.00353902	0.0103418	0.0162599	0	0.0469625	0.263696	0.0819852	0.042285	0.0250723	1
Ttk	0	0.014642	0.00558921	0.00516319	0.00656801	0.00300298	0.0122103	0.00680589	0.00167588	0.0453609	0.199006	0.152538	0.076287	0.0149218	1
Esco2	0.00651924	0.0244584	0.00201835	0.00558672	0.00769266	0.00475667	0.0119967	0.0179765	0.0127005	0.0411856	0.143212	0.0573051	0.191637	0.0353564	1
Rrm2	0.0223594	0.0153958	0.00988162	0.0183984	0.0262575	0.0156803	0.0280037	0.0162154	0.0114384	0.035324	0.0990583	0.0610125	0.044202	0.0370605	1
Cenpf	0.0139228	0.0112786	0.00485162	0.00503287	0.0371525	0.0113874	0.0175468	0.0105523	0.0104125	0.0340729	0.13658	0.0772648	0.121736	0.0320536	1
Ankle1	0	0.017421	0.00332343	0.00605784	0.0158851	0.0175563	0.0227261	0.0444464	0.0165926	0.0297735	0.0740276	0.0513903	0.0371475	0.00647453	1
Cdc25c	0.0231012	0.0078501	0	0.00383969	0.00383938	0.00402659	0.00843577	0	0	0.0276341	0.177171	0.0675122	0.0425562	0	1
Iqgap3	0.0195807	0.016491	0.00152938	0.0042633	0.00224334	0.00435083	0.011978	0.0119518	0.0103196	0.0646908	0.0771197	0.0895775	0.0745045	0.015958	1

## Sheet: Figure 1E
Figure 1E	PCA
	PC1	PC2
C57BL/6 to C57BL/6 1	-33.93	-13.6626
C57BL/6 to BALB/c 1	26.1753	-2.91663
BALB/c to C57BL/6 1	9.90605	24.5462
BALB/c to BALB/c 1	-32.8787	1.89174
C57BL/6 to BALB/c 2	19.3798	-41.7749
BALB/c to BALB/c 2	-32.7945	4.11252
BALB/c to C57BL/6 2	10.6484	24.2929
C57BL/6 to BALB/c 3	33.4937	3.51084

## Sheet: Figure 1F
Figure 1F	Celltype proportion per sample
Sample	celltype	% of sample
BALB/c to BALB/c 1	Podo	0.5082
BALB/c to BALB/c 2	Podo	0.57543
BALB/c to C57BL/6 1	Podo	0.5848
BALB/c to C57BL/6 2	Podo	0.91412
C57BL/6 to BALB/c 1	Podo	0.91425
C57BL/6 to BALB/c 2	Podo	0.89544
C57BL/6 to BALB/c 3	Podo	0.89523
C57BL/6 to C57BL/6 1	Podo	0.64655
BALB/c to BALB/c 1	PT	57.8887
BALB/c to BALB/c 2	PT	55.3165
BALB/c to C57BL/6 1	PT	52.5146
BALB/c to C57BL/6 2	PT	52.1437
C57BL/6 to BALB/c 1	PT	57.2194
C57BL/6 to BALB/c 2	PT	55.3595
C57BL/6 to BALB/c 3	PT	41.7772
C57BL/6 to C57BL/6 1	PT	70.2826
BALB/c to BALB/c 1	tL	2.0328
BALB/c to BALB/c 2	tL	2.60195
BALB/c to C57BL/6 1	tL	2.7193
BALB/c to C57BL/6 2	tL	2.1115
C57BL/6 to BALB/c 1	tL	1.7024
C57BL/6 to BALB/c 2	tL	1.21148
C57BL/6 to BALB/c 3	tL	2.42042
C57BL/6 to C57BL/6 1	tL	0.38314
BALB/c to BALB/c 1	TAL	20.7669
BALB/c to BALB/c 2	TAL	17.0878
BALB/c to C57BL/6 1	TAL	18.4503
BALB/c to C57BL/6 2	TAL	14.1754
C57BL/6 to BALB/c 1	TAL	18.5372
C57BL/6 to BALB/c 2	TAL	17.1715
C57BL/6 to BALB/c 3	TAL	15.6941
C57BL/6 to C57BL/6 1	TAL	15.637
BALB/c to BALB/c 1	DCT	4.389
BALB/c to BALB/c 2	DCT	2.82712
BALB/c to C57BL/6 1	DCT	3.91813
BALB/c to C57BL/6 2	DCT	3.20587
C57BL/6 to BALB/c 1	DCT	6.27364
C57BL/6 to BALB/c 2	DCT	5.55702
C57BL/6 to BALB/c 3	DCT	3.84615
C57BL/6 to C57BL/6 1	DCT	4.5977
BALB/c to BALB/c 1	CNT	3.4419
BALB/c to BALB/c 2	CNT	4.10308
BALB/c to C57BL/6 1	CNT	2.80702
BALB/c to C57BL/6 2	CNT	3.30887
C57BL/6 to BALB/c 1	CNT	2.52207
C57BL/6 to BALB/c 2	CNT	3.2394
C57BL/6 to BALB/c 3	CNT	3.80195
C57BL/6 to C57BL/6 1	CNT	2.92146
BALB/c to BALB/c 1	CD-PC	2.31
BALB/c to BALB/c 2	CD-PC	6.07956
BALB/c to C57BL/6 1	CD-PC	1.37427
BALB/c to C57BL/6 2	CD-PC	4.32599
C57BL/6 to BALB/c 1	CD-PC	0.59899
C57BL/6 to BALB/c 2	CD-PC	1.55386
C57BL/6 to BALB/c 3	CD-PC	2.71883
C57BL/6 to C57BL/6 1	CD-PC	1.24521
BALB/c to BALB/c 1	CD-IC-A	1.3629
BALB/c to BALB/c 2	CD-IC-A	1.92644
BALB/c to C57BL/6 1	CD-IC-A	1.43275
BALB/c to C57BL/6 2	CD-IC-A	1.40337
C57BL/6 to BALB/c 1	CD-IC-A	0.94578
C57BL/6 to BALB/c 2	CD-IC-A	1.39584
C57BL/6 to BALB/c 3	CD-IC-A	1.271
C57BL/6 to C57BL/6 1	CD-IC-A	0.88602
BALB/c to BALB/c 1	CD-IC-B	1.5708
BALB/c to BALB/c 2	CD-IC-B	1.6012
BALB/c to C57BL/6 1	CD-IC-B	1.40351
BALB/c to C57BL/6 2	CD-IC-B	0.927
C57BL/6 to BALB/c 1	CD-IC-B	1.07188
C57BL/6 to BALB/c 2	CD-IC-B	1.23782
C57BL/6 to BALB/c 3	CD-IC-B	1.28205
C57BL/6 to C57BL/6 1	CD-IC-B	1.53257
BALB/c to BALB/c 1	EC	3.3495
BALB/c to BALB/c 2	EC	3.77783
BALB/c to C57BL/6 1	EC	2.95322
BALB/c to C57BL/6 2	EC	3.32175
C57BL/6 to BALB/c 1	EC	2.42749
C57BL/6 to BALB/c 2	EC	2.79168
C57BL/6 to BALB/c 3	EC	4.50928
C57BL/6 to C57BL/6 1	EC	0.81418
BALB/c to BALB/c 1	Leuko	0.1386
BALB/c to BALB/c 2	Leuko	0.12509
BALB/c to C57BL/6 1	Leuko	7.5731
BALB/c to C57BL/6 2	Leuko	8.30436
C57BL/6 to BALB/c 1	Leuko	5.83228
C57BL/6 to BALB/c 2	Leuko	6.95286
C57BL/6 to BALB/c 3	Leuko	15.5062
C57BL/6 to C57BL/6 1	Leuko	0.07184
BALB/c to BALB/c 1	IntC	1.4322
BALB/c to BALB/c 2	IntC	1.77633
BALB/c to C57BL/6 1	IntC	1.60819
BALB/c to C57BL/6 2	IntC	4.11999
C57BL/6 to BALB/c 1	IntC	0.56747
C57BL/6 to BALB/c 2	IntC	1.0798
C57BL/6 to BALB/c 3	IntC	3.43722
C57BL/6 to C57BL/6 1	IntC	0.50287
BALB/c to BALB/c 1	Uro	0.0924
BALB/c to BALB/c 2	Uro	0.17513
BALB/c to C57BL/6 1	Uro	0.2924
BALB/c to C57BL/6 2	Uro	0.28325
C57BL/6 to BALB/c 1	Uro	0.15763
C57BL/6 to BALB/c 2	Uro	0.18436
C57BL/6 to BALB/c 3	Uro	0.83996
C57BL/6 to C57BL/6 1	Uro	0.19157
BALB/c to BALB/c 1	PEC	0.2772
BALB/c to BALB/c 2	PEC	0.52539
BALB/c to C57BL/6 1	PEC	0.52632
BALB/c to C57BL/6 2	PEC	0.4635
C57BL/6 to BALB/c 1	PEC	0.37831
C57BL/6 to BALB/c 2	PEC	0.65841
C57BL/6 to BALB/c 3	PEC	0.43103
C57BL/6 to C57BL/6 1	PEC	0.07184
BALB/c to BALB/c 1	Prolif	0.4389
BALB/c to BALB/c 2	Prolif	1.50113
BALB/c to C57BL/6 1	Prolif	1.84211
BALB/c to C57BL/6 2	Prolif	0.99137
C57BL/6 to BALB/c 1	Prolif	0.8512
C57BL/6 to BALB/c 2	Prolif	0.71109
C57BL/6 to BALB/c 3	Prolif	1.56941
C57BL/6 to C57BL/6 1	Prolif	0.21552
We restricted statistical testing to leukocytes, as they represent the only cell type in which allogeneic transplantation is expected to induce quantitative shifts
	statistic	df	p	p.adj	p.adj.signif	group1	group2 n1		n2
Leuko	5.08	4.00	0.00707	0.00707	**	allo	syn	5	3

## Sheet: Figure 2A
Figure 2A	Number of DGE per strain and celltype
Celltype	Strain		DGE number
Podo	Balbc	Downregulated	14
PT	Balbc	Downregulated	373
tL	Balbc	Downregulated	92
TAL	Balbc	Downregulated	194
DCT	Balbc	Downregulated	115
CNT	Balbc	Downregulated	82
CD-PC	Balbc	Downregulated	356
CD-IC-A	Balbc	Downregulated	62
CD-IC-B	Balbc	Downregulated	16
EC	Balbc	Downregulated	115
IntC	Balbc	Downregulated	217
Uro	Balbc	Downregulated	4
PEC	Balbc	Downregulated	7
Podo	Blck6	Downregulated	61
PT	Blck6	Downregulated	715
tL	Blck6	Downregulated	92
TAL	Blck6	Downregulated	498
DCT	Blck6	Downregulated	400
CNT	Blck6	Downregulated	294
CD-PC	Blck6	Downregulated	239
CD-IC-A	Blck6	Downregulated	99
CD-IC-B	Blck6	Downregulated	171
EC	Blck6	Downregulated	241
IntC	Blck6	Downregulated	168
Uro	Blck6	Downregulated	55
PEC	Blck6	Downregulated	74
Podo	Balbc	Upregulated	75
PT	Balbc	Upregulated	638
tL	Balbc	Upregulated	152
TAL	Balbc	Upregulated	304
DCT	Balbc	Upregulated	246
CNT	Balbc	Upregulated	306
CD-PC	Balbc	Upregulated	571
CD-IC-A	Balbc	Upregulated	155
CD-IC-B	Balbc	Upregulated	139
EC	Balbc	Upregulated	329
IntC	Balbc	Upregulated	317
Uro	Balbc	Upregulated	3
PEC	Balbc	Upregulated	54
Podo	Blck6	Upregulated	50
PT	Blck6	Upregulated	972
tL	Blck6	Upregulated	18
TAL	Blck6	Upregulated	542
DCT	Blck6	Upregulated	413
CNT	Blck6	Upregulated	410
CD-PC	Blck6	Upregulated	124
CD-IC-A	Blck6	Upregulated	62
CD-IC-B	Blck6	Upregulated	136
EC	Blck6	Upregulated	83
IntC	Blck6	Upregulated	47
Uro	Blck6	Upregulated	0
PEC	Blck6	Upregulated	0

## Sheet: Figures 2B-E
Figures 2B-E
Individual data points are not displayed because of the high data volume and because they can be fully recapitulated from the dataset deposited at GEO (accession GSE284742).

## Sheet: Figure 2F
Figure 2F	Cell type–specific pathway enrichment analysis
Pathway	AdjustedPValue	CellType	Strain	log10_fdr (capped at 3 in the plot)
Adipogenesis	0.047663	CD-PC	Balbc	1.32182
Allograft Rejection	4.49277e-11	CD-IC-A	Balbc	10.3475
Allograft Rejection	0.000196851	CD-IC-A	Blck6	3.70586
Allograft Rejection	9.06477e-11	CD-IC-B	Balbc	10.0426
Allograft Rejection	7.05927e-11	CD-IC-B	Blck6	10.1512
Allograft Rejection	4.10444e-09	CD-PC	Balbc	8.38675
Allograft Rejection	2.97601e-10	CD-PC	Blck6	9.52637
Allograft Rejection	3.77457e-10	CNT	Balbc	9.42313
Allograft Rejection	2.42758e-07	CNT	Blck6	6.61483
Allograft Rejection	7.19434e-10	DCT	Balbc	9.14301
Allograft Rejection	2.66285e-07	DCT	Blck6	6.57465
Allograft Rejection	2.63968e-13	EC	Balbc	12.5784
Allograft Rejection	1.2633e-05	EC	Blck6	4.89849
Allograft Rejection	1.48456e-13	IntC	Balbc	12.8284
Allograft Rejection	0.000397614	IntC	Blck6	3.40054
Allograft Rejection	7.49656e-06	PEC	Balbc	5.12514
Allograft Rejection	6.12802e-10	PT	Balbc	9.21268
Allograft Rejection	8.0915e-07	PT	Blck6	6.09197
Allograft Rejection	7.43803e-06	Podo	Balbc	5.12854
Allograft Rejection	2.38767e-07	Podo	Blck6	6.62203
Allograft Rejection	1.24358e-07	TAL	Balbc	6.90533
Allograft Rejection	5.73859e-07	TAL	Blck6	6.24119
Allograft Rejection	0.00039538	Uro	Balbc	3.40299
Allograft Rejection	3.18605e-09	tL	Balbc	8.49675
Allograft Rejection	6.20761e-05	tL	Blck6	4.20708
Androgen Response	0.0449816	CD-PC	Balbc	1.34697
Androgen Response	0.00150158	CD-PC	Blck6	2.82345
Androgen Response	0.0141389	CNT	Balbc	1.84958
Androgen Response	3.17157e-05	CNT	Blck6	4.49873
Androgen Response	0.000887344	DCT	Blck6	3.05191
Androgen Response	0.037789	PT	Balbc	1.42263
Androgen Response	9.8941e-05	PT	Blck6	4.00462
Androgen Response	0.012719	TAL	Balbc	1.89555
Androgen Response	4.26424e-07	TAL	Blck6	6.37016
Androgen Response	0.0149257	Uro	Balbc	1.82606
Androgen Response	0.0170575	tL	Balbc	1.76808
Angiogenesis	0.00250418	DCT	Blck6	2.60134
Angiogenesis	0.0369244	EC	Balbc	1.43269
Angiogenesis	0.000699834	IntC	Balbc	3.15501
Angiogenesis	8.57819e-06	IntC	Blck6	5.0666
Apical Junction	0.0184022	CD-IC-A	Balbc	1.73513
Apical Junction	0.0364424	CD-IC-B	Balbc	1.43839
Apical Junction	0.000485848	CD-PC	Balbc	3.3135
Apical Junction	0.0282584	CNT	Balbc	1.54885
Apical Junction	0.00264634	CNT	Blck6	2.57736
Apical Junction	1.82568e-05	EC	Balbc	4.73857
Apical Junction	0.000978837	IntC	Balbc	3.00929
Apical Junction	0.0330685	PT	Balbc	1.48059
Apical Junction	0.000425077	PT	Blck6	3.37153
Apical Junction	0.0032593	TAL	Balbc	2.48688
Apical Junction	0.000117924	TAL	Blck6	3.9284
Apical Junction	0.0111193	tL	Balbc	1.95392
Apoptosis	0.0295345	CD-IC-A	Balbc	1.52967
Apoptosis	0.00575584	CD-IC-A	Blck6	2.23989
Apoptosis	0.0184037	CD-IC-B	Blck6	1.73509
Apoptosis	3.94138e-08	CD-PC	Balbc	7.40435
Apoptosis	4.13925e-06	CD-PC	Blck6	5.38308
Apoptosis	0.00020554	CNT	Balbc	3.6871
Apoptosis	5.2317e-08	CNT	Blck6	7.28136
Apoptosis	0.000813909	DCT	Balbc	3.08942
Apoptosis	8.02752e-06	DCT	Blck6	5.09542
Apoptosis	3.78591e-07	EC	Balbc	6.42183
Apoptosis	0.000314123	EC	Blck6	3.5029
Apoptosis	3.17586e-07	IntC	Balbc	6.49814
Apoptosis	0.00392846	PEC	Balbc	2.40578
Apoptosis	0.00700954	PT	Balbc	2.15431
Apoptosis	1.38508e-06	PT	Blck6	5.85853
Apoptosis	0.0141983	Podo	Balbc	1.84776
Apoptosis	0.0278964	Podo	Blck6	1.55445
Apoptosis	0.00286362	TAL	Balbc	2.54308
Apoptosis	1.9182e-08	TAL	Blck6	7.71711
Apoptosis	0.00412089	tL	Balbc	2.38501
Cholesterol Homeostasis	0.00054944	CD-PC	Balbc	3.26008
Cholesterol Homeostasis	0.000640357	CNT	Balbc	3.19358
Cholesterol Homeostasis	1.44151e-05	CNT	Blck6	4.84118
Cholesterol Homeostasis	0.00754438	DCT	Balbc	2.12238
Cholesterol Homeostasis	0.0440843	DCT	Blck6	1.35572
Cholesterol Homeostasis	0.00338759	EC	Balbc	2.47011
Cholesterol Homeostasis	0.00792929	PT	Balbc	2.10077
Cholesterol Homeostasis	0.00844672	PT	Blck6	2.07331
Cholesterol Homeostasis	0.0141212	TAL	Balbc	1.85013
Cholesterol Homeostasis	0.00283025	TAL	Blck6	2.54817
Coagulation	0.000113052	CD-PC	Balbc	3.94672
Coagulation	0.00456803	CNT	Balbc	2.34027
Coagulation	0.0019138	CNT	Blck6	2.7181
Coagulation	0.0212672	DCT	Balbc	1.67229
Coagulation	0.00661553	DCT	Blck6	2.17944
Coagulation	0.000272978	EC	Balbc	3.56387
Coagulation	0.000269596	IntC	Balbc	3.56929
Coagulation	0.00700954	PT	Balbc	2.15431
Coagulation	0.0429711	PT	Blck6	1.36682
Coagulation	0.0340236	Podo	Balbc	1.46822
Coagulation	0.00391769	TAL	Blck6	2.40697
Coagulation	0.00226647	tL	Balbc	2.64465
Complement	0.000746284	CD-IC-A	Balbc	3.1271
Complement	0.00176757	CD-IC-B	Balbc	2.75262
Complement	0.0357936	CD-IC-B	Blck6	1.44619
Complement	1.08566e-09	CD-PC	Balbc	8.96431
Complement	0.000172567	CD-PC	Blck6	3.76304
Complement	6.27395e-11	CNT	Balbc	10.2025
Complement	1.11769e-08	CNT	Blck6	7.95168
Complement	2.6866e-07	DCT	Balbc	6.5708
Complement	1.66008e-08	DCT	Blck6	7.77987
Complement	3.77155e-15	EC	Balbc	14.4235
Complement	0.000738838	EC	Blck6	3.13145
Complement	4.24901e-09	IntC	Balbc	8.37171
Complement	0.0353138	PEC	Balbc	1.45206
Complement	2.61795e-07	PT	Balbc	6.58204
Complement	2.59724e-07	PT	Blck6	6.58549
Complement	0.0194963	Podo	Balbc	1.71005
Complement	0.0376162	Podo	Blck6	1.42462
Complement	2.45359e-08	TAL	Balbc	7.6102
Complement	9.2329e-09	TAL	Blck6	8.03466
Complement	1.98912e-06	tL	Balbc	5.70134
E2F Targets	0.0343144	EC	Balbc	1.46452
Epithelial Mesenchymal Transition	3.87599e-06	CD-PC	Balbc	5.41162
Epithelial Mesenchymal Transition	0.0282584	CNT	Balbc	1.54885
Epithelial Mesenchymal Transition	0.000952477	CNT	Blck6	3.02115
Epithelial Mesenchymal Transition	0.00325347	DCT	Balbc	2.48765
Epithelial Mesenchymal Transition	0.000321604	DCT	Blck6	3.49268
Epithelial Mesenchymal Transition	1.57979e-11	EC	Balbc	10.8014
Epithelial Mesenchymal Transition	0.00411278	EC	Blck6	2.38586
Epithelial Mesenchymal Transition	2.39442e-18	IntC	Balbc	17.6208
Epithelial Mesenchymal Transition	3.44381e-10	IntC	Blck6	9.46296
Epithelial Mesenchymal Transition	0.01546	PT	Balbc	1.81079
Epithelial Mesenchymal Transition	0.00546493	PT	Blck6	2.26242
Epithelial Mesenchymal Transition	0.000247404	TAL	Balbc	3.60659
Epithelial Mesenchymal Transition	9.53095e-06	TAL	Blck6	5.02086
Estrogen Response Early	0.000485848	CD-PC	Balbc	3.3135
Estrogen Response Early	0.0214698	CD-PC	Blck6	1.66817
Estrogen Response Early	0.00353425	TAL	Blck6	2.4517
Estrogen Response Late	0.0241049	CD-PC	Balbc	1.61789
Estrogen Response Late	0.0496356	CNT	Blck6	1.30421
Fatty Acid Metabolism	0.0322973	DCT	Balbc	1.49083
Fatty Acid Metabolism	0.0155418	IntC	Blck6	1.8085
G2-M Checkpoint	0.0133047	EC	Balbc	1.87599
Glycolysis	7.78133e-08	CD-PC	Balbc	7.10895
Hedgehog Signaling	0.0369244	EC	Balbc	1.43269
Hypoxia	4.10444e-09	CD-PC	Balbc	8.38675
Hypoxia	0.0496356	CNT	Blck6	1.30421
Hypoxia	0.0224425	DCT	Blck6	1.64893
Hypoxia	1.82568e-05	EC	Balbc	4.73857
Hypoxia	0.000269596	IntC	Balbc	3.56929
Hypoxia	0.00700954	PT	Balbc	2.15431
Hypoxia	7.27864e-06	PT	Blck6	5.13795
Hypoxia	0.0288512	TAL	Balbc	1.53984
Hypoxia	0.000117924	TAL	Blck6	3.9284
IL-2/STAT5 Signaling	0.0106286	CD-IC-A	Blck6	1.97352
IL-2/STAT5 Signaling	0.0364424	CD-IC-B	Balbc	1.43839
IL-2/STAT5 Signaling	0.0103962	CD-IC-B	Blck6	1.98313
IL-2/STAT5 Signaling	3.83781e-06	CD-PC	Balbc	5.41592
IL-2/STAT5 Signaling	0.00481962	CD-PC	Blck6	2.31699
IL-2/STAT5 Signaling	0.0040471	CNT	Balbc	2.39286
IL-2/STAT5 Signaling	0.00264634	CNT	Blck6	2.57736
IL-2/STAT5 Signaling	0.0306144	DCT	Balbc	1.51407
IL-2/STAT5 Signaling	0.000921647	DCT	Blck6	3.03544
IL-2/STAT5 Signaling	9.25114e-07	EC	Balbc	6.0338
IL-2/STAT5 Signaling	0.00411278	EC	Blck6	2.38586
IL-2/STAT5 Signaling	0.000269596	IntC	Balbc	3.56929
IL-2/STAT5 Signaling	0.0221668	IntC	Blck6	1.6543
IL-2/STAT5 Signaling	0.00611731	PEC	Balbc	2.21344
IL-2/STAT5 Signaling	0.00329738	PT	Balbc	2.48183
IL-2/STAT5 Signaling	1.90029e-05	PT	Blck6	4.72118
IL-2/STAT5 Signaling	0.000247404	TAL	Balbc	3.60659
IL-2/STAT5 Signaling	1.56193e-07	TAL	Blck6	6.80634
IL-2/STAT5 Signaling	0.00055818	tL	Balbc	3.25323
IL-6/JAK/STAT3 Signaling	3.56781e-05	CD-IC-A	Balbc	4.4476
IL-6/JAK/STAT3 Signaling	0.000676285	CD-IC-A	Blck6	3.16987
IL-6/JAK/STAT3 Signaling	1.38552e-05	CD-IC-B	Balbc	4.85839
IL-6/JAK/STAT3 Signaling	8.2935e-07	CD-IC-B	Blck6	6.08126
IL-6/JAK/STAT3 Signaling	4.32644e-10	CD-PC	Balbc	9.36387
IL-6/JAK/STAT3 Signaling	5.7332e-07	CD-PC	Blck6	6.2416
IL-6/JAK/STAT3 Signaling	7.52758e-07	CNT	Balbc	6.12334
IL-6/JAK/STAT3 Signaling	1.30755e-06	CNT	Blck6	5.88354
IL-6/JAK/STAT3 Signaling	7.49109e-05	DCT	Balbc	4.12545
IL-6/JAK/STAT3 Signaling	3.0419e-08	DCT	Blck6	7.51686
IL-6/JAK/STAT3 Signaling	6.30234e-06	EC	Balbc	5.2005
IL-6/JAK/STAT3 Signaling	0.00165335	EC	Blck6	2.78163
IL-6/JAK/STAT3 Signaling	4.20426e-05	IntC	Balbc	4.37631
IL-6/JAK/STAT3 Signaling	0.000237567	IntC	Blck6	3.62421
IL-6/JAK/STAT3 Signaling	0.0058804	PEC	Balbc	2.23059
IL-6/JAK/STAT3 Signaling	7.84647e-07	PT	Balbc	6.10533
IL-6/JAK/STAT3 Signaling	4.58407e-08	PT	Blck6	7.33875
IL-6/JAK/STAT3 Signaling	0.00173237	Podo	Balbc	2.76136
IL-6/JAK/STAT3 Signaling	0.00686347	Podo	Blck6	2.16346
IL-6/JAK/STAT3 Signaling	5.65948e-06	TAL	Balbc	5.24722
IL-6/JAK/STAT3 Signaling	1.90828e-11	TAL	Blck6	10.7194
IL-6/JAK/STAT3 Signaling	1.2795e-07	tL	Balbc	6.89296
Inflammatory Response	4.87399e-08	CD-IC-A	Balbc	7.31211
Inflammatory Response	0.000196851	CD-IC-A	Blck6	3.70586
Inflammatory Response	1.08891e-06	CD-IC-B	Balbc	5.96301
Inflammatory Response	8.2935e-07	CD-IC-B	Blck6	6.08126
Inflammatory Response	5.28505e-05	CD-PC	Balbc	4.27695
Inflammatory Response	3.2953e-06	CD-PC	Blck6	5.4821
Inflammatory Response	1.58365e-05	CNT	Balbc	4.80034
Inflammatory Response	0.000952477	CNT	Blck6	3.02115
Inflammatory Response	0.000213186	DCT	Balbc	3.67124
Inflammatory Response	0.000321604	DCT	Blck6	3.49268
Inflammatory Response	2.26806e-07	EC	Balbc	6.64435
Inflammatory Response	0.000738838	EC	Blck6	3.13145
Inflammatory Response	1.89846e-05	IntC	Balbc	4.7216
Inflammatory Response	0.00355521	IntC	Blck6	2.44914
Inflammatory Response	8.43569e-05	PEC	Balbc	4.07388
Inflammatory Response	8.02063e-07	PT	Balbc	6.09579
Inflammatory Response	3.19523e-08	PT	Blck6	7.4955
Inflammatory Response	0.000710596	Podo	Balbc	3.14838
Inflammatory Response	0.00686347	Podo	Blck6	2.16346
Inflammatory Response	3.72865e-06	TAL	Balbc	5.42845
Inflammatory Response	5.73859e-07	TAL	Blck6	6.24119
Inflammatory Response	3.18605e-09	tL	Balbc	8.49675
Interferon Alpha Response	2.51919e-30	CD-IC-A	Balbc	29.5987
Interferon Alpha Response	3.96402e-19	CD-IC-A	Blck6	18.4019
Interferon Alpha Response	6.41804e-30	CD-IC-B	Balbc	29.1926
Interferon Alpha Response	6.46498e-32	CD-IC-B	Blck6	31.1894
Interferon Alpha Response	6.4013e-35	CD-PC	Balbc	34.1937
Interferon Alpha Response	2.56801e-29	CD-PC	Blck6	28.5904
Interferon Alpha Response	1.07772e-37	CNT	Balbc	36.9675
Interferon Alpha Response	1.22134e-37	CNT	Blck6	36.9132
Interferon Alpha Response	8.52568e-38	DCT	Balbc	37.0693
Interferon Alpha Response	1.27177e-40	DCT	Blck6	39.8956
Interferon Alpha Response	4.46397e-18	EC	Balbc	17.3503
Interferon Alpha Response	8.57131e-14	EC	Blck6	13.067
Interferon Alpha Response	1.2074e-14	IntC	Balbc	13.9181
Interferon Alpha Response	4.70674e-10	IntC	Blck6	9.32728
Interferon Alpha Response	4.35599e-20	PEC	Balbc	19.3609
Interferon Alpha Response	5.26178e-40	PT	Balbc	39.2789
Interferon Alpha Response	2.09104e-38	PT	Blck6	37.6796
Interferon Alpha Response	3.31462e-23	Podo	Balbc	22.4796
Interferon Alpha Response	1.20944e-24	Podo	Blck6	23.9174
Interferon Alpha Response	4.50047e-41	TAL	Balbc	40.3467
Interferon Alpha Response	1.09074e-41	TAL	Blck6	40.9623
Interferon Alpha Response	0.000278477	Uro	Balbc	3.55521
Interferon Alpha Response	3.9377e-34	tL	Balbc	33.4048
Interferon Alpha Response	1.37935e-07	tL	Blck6	6.86032
Interferon Gamma Response	2.22866e-47	CD-IC-A	Balbc	46.652
Interferon Gamma Response	5.32139e-24	CD-IC-A	Blck6	23.274
Interferon Gamma Response	5.88079e-43	CD-IC-B	Balbc	42.2306
Interferon Gamma Response	1.00265e-46	CD-IC-B	Blck6	45.9989
Interferon Gamma Response	9.9327e-48	CD-PC	Balbc	47.0029
Interferon Gamma Response	2.59274e-43	CD-PC	Blck6	42.5862
Interferon Gamma Response	1.3594e-50	CNT	Balbc	49.8667
Interferon Gamma Response	1.91162e-47	CNT	Blck6	46.7186
Interferon Gamma Response	2.05324e-45	DCT	Balbc	44.6876
Interferon Gamma Response	1.28806e-48	DCT	Blck6	47.8901
Interferon Gamma Response	7.40992e-42	EC	Balbc	41.1302
Interferon Gamma Response	3.49744e-24	EC	Blck6	23.4562
Interferon Gamma Response	5.94888e-26	IntC	Balbc	25.2256
Interferon Gamma Response	2.2187e-11	IntC	Blck6	10.6539
Interferon Gamma Response	1.18717e-23	PEC	Balbc	22.9255
Interferon Gamma Response	8.9008e-51	PT	Balbc	50.0506
Interferon Gamma Response	2.49335e-55	PT	Blck6	54.6032
Interferon Gamma Response	1.08414e-28	Podo	Balbc	27.9649
Interferon Gamma Response	4.67555e-30	Podo	Blck6	29.3302
Interferon Gamma Response	9.34805e-51	TAL	Balbc	50.0293
Interferon Gamma Response	3.74664e-49	TAL	Blck6	48.4264
Interferon Gamma Response	0.00039538	Uro	Balbc	3.40299
Interferon Gamma Response	1.59339e-49	tL	Balbc	48.7977
Interferon Gamma Response	2.56582e-06	tL	Blck6	5.59077
KRAS Signaling Up	0.000746284	CD-IC-A	Balbc	3.1271
KRAS Signaling Up	0.000373245	CD-IC-B	Balbc	3.42801
KRAS Signaling Up	0.0357936	CD-IC-B	Blck6	1.44619
KRAS Signaling Up	0.00392505	CD-PC	Balbc	2.40615
KRAS Signaling Up	0.0214698	CD-PC	Blck6	1.66817
KRAS Signaling Up	0.0040471	CNT	Balbc	2.39286
KRAS Signaling Up	0.0206674	CNT	Blck6	1.68471
KRAS Signaling Up	0.000813909	DCT	Balbc	3.08942
KRAS Signaling Up	0.000921647	DCT	Blck6	3.03544
KRAS Signaling Up	9.25114e-07	EC	Balbc	6.0338
KRAS Signaling Up	0.024556	EC	Blck6	1.60984
KRAS Signaling Up	0.000269596	IntC	Balbc	3.56929
KRAS Signaling Up	0.0221668	IntC	Blck6	1.6543
KRAS Signaling Up	0.0353138	PEC	Balbc	1.45206
KRAS Signaling Up	0.00700954	PT	Balbc	2.15431
KRAS Signaling Up	0.00546493	PT	Blck6	2.26242
KRAS Signaling Up	0.0194963	Podo	Balbc	1.71005
KRAS Signaling Up	0.000974077	TAL	Balbc	3.01141
KRAS Signaling Up	0.0221141	TAL	Blck6	1.65533
KRAS Signaling Up	0.00266122	tL	Balbc	2.57492
Myc Targets V1	1.07968e-06	CD-PC	Balbc	5.9667
Myc Targets V1	0.0206674	CNT	Blck6	1.68471
Myc Targets V1	0.0108057	DCT	Balbc	1.96635
Myc Targets V1	1.82568e-05	EC	Balbc	4.73857
Myc Targets V1	1.89846e-05	IntC	Balbc	4.7216
Myc Targets V1	0.00131759	PT	Balbc	2.88022
Myogenesis	0.00972211	IntC	Balbc	2.01224
Myogenesis	0.0221668	IntC	Blck6	1.6543
Myogenesis	0.00888982	TAL	Blck6	2.05111
Oxidative Phosphorylation	0.047663	CD-PC	Balbc	1.32182
PI3K/AKT/mTOR Signaling	0.000485848	CD-PC	Balbc	3.3135
PI3K/AKT/mTOR Signaling	0.0166416	CNT	Balbc	1.7788
PI3K/AKT/mTOR Signaling	0.0128217	IntC	Balbc	1.89205
PI3K/AKT/mTOR Signaling	0.0185057	PT	Balbc	1.73269
PI3K/AKT/mTOR Signaling	0.0194963	Podo	Balbc	1.71005
PI3K/AKT/mTOR Signaling	0.0141212	TAL	Balbc	1.85013
Pperoxisome	0.0497568	TAL	Balbc	1.30315
Reactive Oxygen Species Pathway	0.00883174	CNT	Blck6	2.05395
Reactive Oxygen Species Pathway	0.0178802	EC	Balbc	1.74763
Reactive Oxygen Species Pathway	0.0478396	PT	Balbc	1.32021
Reactive Oxygen Species Pathway	0.0241248	PT	Blck6	1.61754
Reactive Oxygen Species Pathway	0.0251282	TAL	Blck6	1.59984
TGF-beta Signaling	0.0135805	DCT	Blck6	1.86709
TGF-beta Signaling	0.0238478	EC	Balbc	1.62255
TGF-beta Signaling	0.0196598	IntC	Balbc	1.70642
TGF-beta Signaling	0.00369841	PT	Blck6	2.43199
TNF-alpha Signaling via NF-kB	0.000746284	CD-IC-A	Balbc	3.1271
TNF-alpha Signaling via NF-kB	0.00176757	CD-IC-B	Balbc	2.75262
TNF-alpha Signaling via NF-kB	0.000342933	CD-IC-B	Blck6	3.46479
TNF-alpha Signaling via NF-kB	2.9232e-07	CD-PC	Balbc	6.53414
TNF-alpha Signaling via NF-kB	0.00107366	CD-PC	Blck6	2.96913
TNF-alpha Signaling via NF-kB	1.58365e-05	CNT	Balbc	4.80034
TNF-alpha Signaling via NF-kB	1.11769e-08	CNT	Blck6	7.95168
TNF-alpha Signaling via NF-kB	5.54076e-05	DCT	Balbc	4.25643
TNF-alpha Signaling via NF-kB	5.80109e-08	DCT	Blck6	7.23649
TNF-alpha Signaling via NF-kB	4.46397e-18	EC	Balbc	17.3503
TNF-alpha Signaling via NF-kB	1.2633e-05	EC	Blck6	4.89849
TNF-alpha Signaling via NF-kB	1.89846e-05	IntC	Balbc	4.7216
TNF-alpha Signaling via NF-kB	0.0353138	PEC	Balbc	1.45206
TNF-alpha Signaling via NF-kB	4.7174e-12	PT	Balbc	11.3263
TNF-alpha Signaling via NF-kB	8.58306e-23	PT	Blck6	22.0664
TNF-alpha Signaling via NF-kB	0.0376162	Podo	Blck6	1.42462
TNF-alpha Signaling via NF-kB	1.46721e-05	TAL	Balbc	4.83351
TNF-alpha Signaling via NF-kB	2.72671e-20	TAL	Blck6	19.5644
TNF-alpha Signaling via NF-kB	0.000101214	tL	Balbc	3.99476
UV Response Dn	0.00124898	IntC	Balbc	2.90344
UV Response Dn	0.00118764	IntC	Blck6	2.92531
UV Response Up	0.00394171	CD-PC	Balbc	2.40432
Unfolded Protein Response	5.19659e-07	CD-PC	Balbc	6.28428
Unfolded Protein Response	0.00490729	IntC	Balbc	2.30916
Unfolded Protein Response	0.0216707	Podo	Balbc	1.66413
Xenobiotic Metabolism	0.047663	CD-PC	Balbc	1.32182
mTORC1 Signaling	1.49445e-12	CD-PC	Balbc	11.8255
mTORC1 Signaling	0.0282584	CNT	Balbc	1.54885
mTORC1 Signaling	0.0133047	EC	Balbc	1.87599
mTORC1 Signaling	0.00972211	IntC	Balbc	2.01224
mTORC1 Signaling	0.0436376	PT	Blck6	1.36014
mTORC1 Signaling	0.0194963	Podo	Balbc	1.71005
p53 Pathway	2.9232e-07	CD-PC	Balbc	6.53414
p53 Pathway	0.00481962	CD-PC	Blck6	2.31699
p53 Pathway	0.0282584	CNT	Balbc	1.54885
p53 Pathway	7.53875e-05	CNT	Blck6	4.1227
p53 Pathway	0.0306144	DCT	Balbc	1.51407
p53 Pathway	0.00010027	DCT	Blck6	3.99883
p53 Pathway	0.00130576	EC	Balbc	2.88414
p53 Pathway	0.00329785	IntC	Balbc	2.48177
p53 Pathway	0.000143755	PT	Balbc	3.84238
p53 Pathway	8.18737e-08	PT	Blck6	7.08686
p53 Pathway	6.55811e-05	TAL	Balbc	4.18322
p53 Pathway	9.2329e-09	TAL	Blck6	8.03466
p53 Pathway	0.0409197	tL	Balbc	1.38807

## Sheet: Figure 3A
UMAP	Individual data points are not displayed because of the high data volume and because they can be fully recapitulated from the dataset deposited at GEO (accession GSE284742).
PAGA Analysis
Cell_ID	Pseudotime	Celltype
1_AAACCCAAGGGATCTG-1	0	PT S3 med.
1_AAACGAACACCTGTCT-1	0.0932059	PT S3 med.
1_AAAGGGCTCGTAGCCG-1	0.0768948	PT S3 med.
1_AAAGTCCCATCCGTGG-1	0.0658178	PT S3 med.
1_AAAGTCCGTACAAAGT-1	0.0839836	PT S3 med.
1_AACAAAGCACGCGCTA-1	0.0545439	PT S3 med.
1_AACAACCGTTTAAGGA-1	0.131703	PT S3 med.
1_AACAAGAAGAGACAAG-1	0.0869594	PT S3 med.
1_AACACACCACGCGCTA-1	0.0823029	PT S3 med.
1_AACAGGGGTTTGGAGG-1	0.0571164	PT S3 med.
1_AACCACAAGATTGAGT-1	0.115643	PT S3 med.
1_AACCATGCACGCTGAC-1	0.0844041	PT S3 med.
1_AACGGGAGTCGTAATC-1	0.0732287	PT S3 med.
1_AACTTCTAGCGTGCCT-1	0.309295	PT S3 med.
1_AACTTCTCATTAGGCT-1	0.0707288	PT S3 med.
1_AACTTCTTCCTTTAGT-1	0.125293	PT S3 med.
1_AAGACAACATTGAAGA-1	0.059	PT S3 med.
1_AAGATAGCAGGTTCAT-1	0.193674	PT S3 med.
1_AAGCCATAGATGCTAA-1	0.146581	PT S3 med.
1_AAGCCATTCCTAGCTC-1	0.0958949	PT S3 med.
1_AAGCGTTGTGCTCTCT-1	0.0613604	PT S3 med.
1_AAGGAATGTAGACTGG-1	0.137914	PT S3 med.
1_AAGTGAAGTAAGATTG-1	0.0646657	PT S3 med.
1_AATGCCAGTGTCCATA-1	0.0918193	PT S3 med.
1_ACAAGCTAGAGTTCGG-1	0.112767	PT S3 med.
1_ACACAGTAGAACCCGA-1	0.0726256	PT S3 med.
1_ACACAGTCAGGGAATC-1	0.0902762	PT S3 med.
1_ACACGCGCATCCGGCA-1	0.044313	PT S3 med.
1_ACACTGACACGCGTGT-1	0.060652	PT S3 med.
1_ACAGGGATCACAGAGG-1	0.0653052	PT S3 med.
1_ACCAACATCACGGAGA-1	0.0575805	PT S3 med.
1_ACCAACATCCGGTTCT-1	0.0616601	PT S3 med.
1_ACGGGTCAGCCGTTAT-1	0.0917966	PT S3 med.
1_ACGTCCTAGCACAAAT-1	0.0978405	PT S3 med.
1_ACTACGACACTGGAAG-1	0.122599	PT S3 med.
1_ACTATCTCATGGCCAC-1	0.109993	PT S3 med.
1_ACTATTCCAATTTCCT-1	0.134839	PT S3 med.
1_ACTCCCAGTCGCGTCA-1	0.0999429	PT S3 med.
1_ACTCTCGTCTGAGAAA-1	0.117373	PT S3 med.
1_ACTGTGACATGAGGGT-1	0.0856257	PT S3 med.
1_ACTTATCGTACCTATG-1	0.0816621	PT S3 med.
1_ACTTCCGGTGGAATGC-1	0.0721811	PT S3 med.
1_ACTTCGCCACTTGGCG-1	0.0895523	PT S3 med.
1_ACTTCGCCAGAGGACT-1	0.154037	PT S3 med.
1_AGAAGTAGTAATGATG-1	0.070337	PT S3 med.
1_AGACACTTCAAGTTGC-1	0.0501091	PT S3 med.
1_AGACAGGTCGAGAGCA-1	0.0805479	PT S3 med.
1_AGACCATGTCACAGTT-1	0.0653293	PT S3 med.
1_AGACTCACAACGTTAC-1	0.112975	PT S3 med.
1_AGAGAATCATTGTGCA-1	0.101474	PT S3 med.
1_AGAGAGCGTCAGTCTA-1	0.107289	PT S3 med.
1_AGATAGACACACACTA-1	0.0861115	PT S3 med.
1_AGATCGTAGAAACCAT-1	0.0942076	PT S3 med.
1_AGATGCTCAGCGATTT-1	0.082629	PT S3 med.
1_AGATGCTTCGTAGTGT-1	0.124225	PT S3 med.
1_AGCGATTCATTCACAG-1	0.0702985	PT S3 med.
1_AGCGCCATCCGTGCGA-1	0.050416	PT S3 med.
1_AGCGCTGTCGACATTG-1	0.0933691	PT S3 med.
1_AGCGCTGTCTCACTCG-1	0.100599	PT S3 med.
1_AGCGTCGGTATGGTAA-1	0.115275	PT S3 med.
1_AGCTCAAGTTTCGTGA-1	0.0370905	PT S3 med.
1_AGCTTCCAGACAGCTG-1	0.0427663	PT S3 med.
1_AGGAAATCAGCCTATA-1	0.095666	PT S3 med.
1_AGGAAATGTAGGCTCC-1	0.0252707	PT S3 med.
1_AGGAAATTCGACGACC-1	0.0826297	PT S3 med.
1_AGGACGAGTACAGAGC-1	0.0848861	PT S3 med.
1_AGGACTTCATGACGTT-1	0.105056	PT S3 med.
1_AGGACTTGTTCGGACC-1	0.0721619	PT S3 med.
1_AGGAGGTGTAAGACCG-1	0.0626723	PT S3 med.
1_AGGATCTAGTACAGCG-1	0.131582	PT S3 med.
1_AGGATCTTCTTTGCGC-1	0.0534518	PT S3 med.
1_AGGCATTAGGTAACTA-1	0.136781	PT S3 med.
1_AGGCCACAGATCCGAG-1	0.105334	PT S3 med.
1_AGGGAGTCACAAGCAG-1	0.102589	PT S3 med.
1_AGGTAGGAGGTACAAT-1	0.0855252	PT S3 med.
1_AGGTAGGGTTCTCACC-1	0.0868752	PT S3 med.
1_AGGTCATTCGTCGACG-1	0.0766557	PT S3 med.
1_AGGTGTTGTATGATCC-1	0.0971561	PT S3 med.
1_AGGTGTTTCTCCCAAC-1	0.0783025	PT S3 med.
1_AGGTTGTGTCAACATC-1	0.0687688	PT S3 med.
1_AGTAACCTCGTTGCCT-1	0.141986	PT S3 med.
1_AGTACCAAGAAGGATG-1	0.0795446	PT S3 med.
1_AGTACCAAGTCCCTAA-1	0.108464	PT S3 med.
1_AGTACCATCAGAGTTC-1	0.0966592	PT S3 med.
1_AGTAGCTAGTTCCATG-1	0.0809007	PT S3 med.
1_AGTCATGCAATACCCA-1	0.113436	PT S3 med.
1_AGTCATGGTTGCTGAT-1	0.0607395	PT S3 med.
1_AGTCTCCGTGTGTCGC-1	0.0880903	PT S3 med.
1_AGTCTCCTCGTAACCA-1	0.0737623	PT S3 med.
1_AGTTAGCTCCAATCTT-1	0.0851254	PT S3 med.
1_ATACCTTAGGACCCAA-1	0.131211	PT S3 med.
1_ATACTTCGTACGGCAA-1	0.0832599	PT S3 med.
1_ATACTTCGTAGATTGA-1	0.0855814	PT S3 med.
1_ATAGAGACAAGGGCAT-1	0.106682	PT S3 med.
1_ATCACAGAGTCTGCAT-1	0.0922419	PT S3 med.
1_ATCACAGTCTGGACCG-1	0.0790521	PT S3 med.
1_ATCACAGTCTGGGCGT-1	0.091349	PT S3 med.
1_ATCATTCGTACCTAAC-1	0.0937669	PT S3 med.
1_ATCCACCGTAACGTTC-1	0.110043	PT S3 med.
1_ATCCATTGTACTGTTG-1	0.0889671	PT S3 med.
1_ATCCATTGTTTGGAAA-1	0.0655777	PT S3 med.
1_ATCCCTGAGCAGCCCT-1	0.0896511	PT S3 med.
1_ATCCGTCGTACAAAGT-1	0.108154	PT S3 med.
1_ATCGATGTCGATGCAT-1	0.0970726	PT S3 med.
1_ATCGCCTGTGCCTGCA-1	0.0980345	PT S3 med.
1_ATCGTAGTCCGTGTAA-1	0.0755978	PT S3 med.
1_ATCTTCACATCCTAAG-1	0.049788	PT S3 med.
1_ATCTTCATCAACTGAC-1	0.086709	PT S3 med.
1_ATGACCAAGCCTAGGA-1	0.0663002	PT S3 med.
1_ATGAGTCCACTCGATA-1	0.0986435	PT S3 med.
1_ATGATCGAGATGGCGT-1	0.079048	PT S3 med.
1_ATGATCGTCCATTTGT-1	0.0844824	PT S3 med.
1_ATGCATGTCTATGTGG-1	0.103827	PT S3 med.
1_ATGCCTCTCTGAATCG-1	0.09886	PT S3 med.
1_ATGCGATTCCGGGACT-1	0.0735753	PT S3 med.
1_ATGGAGGGTAACCCTA-1	0.0577305	PT S3 med.
1_ATGGATCGTCCAAGAG-1	0.0763582	PT S3 med.
1_ATGGGAGAGTATGAGT-1	0.0886625	PT S3 med.
1_ATGGGTTTCCGCAAAT-1	0.089926	PT S3 med.
1_ATGGTTGCACACCGCA-1	0.0986033	PT S3 med.
1_ATGTCTTTCATCACCC-1	0.0984909	PT S3 med.
1_ATTACTCAGGTTCTTG-1	0.0867513	PT S3 med.
1_ATTCATCGTGCCTGAC-1	0.0885977	PT S3 med.
1_ATTCTTGAGAAGAGCA-1	0.0905346	PT S3 med.
1_ATTCTTGAGCGCACAA-1	0.105948	PT S3 med.
1_ATTCTTGGTCCTACGG-1	0.0806591	PT S3 med.
1_ATTTACCCAGTAACCT-1	0.0791062	PT S3 med.
1_ATTTCACCATGTGGCC-1	0.0959068	PT S3 med.
1_ATTTCACTCGATACGT-1	0.0905071	PT S3 med.
1_ATTTCTGCACGCAGTC-1	0.0665421	PT S3 med.
1_CAACCAAGTTGTATGC-1	0.103484	PT S3 med.
1_CAACGATAGAGTGGCT-1	0.0878717	PT S3 med.
1_CAAGAGGCAACAGCTT-1	0.0912754	PT S3 med.
1_CAAGGGACATCGATAC-1	0.09096	PT S3 med.
1_CAATACGAGACGAGCT-1	0.10924	PT S3 med.
1_CAATCGACAAACTCGT-1	0.120217	PT S3 med.
1_CAATTTCAGGAAGTGA-1	0.0867907	PT S3 med.
1_CACACAACAACCACGC-1	0.099571	PT S3 med.
1_CACATGAGTGATAGAT-1	0.063695	PT S3 med.
1_CACATGATCCTCTAAT-1	0.118973	PT S3 med.
1_CACGAATAGCACACAG-1	0.120336	PT S3 med.
1_CACGAATTCGGTGTTA-1	0.0609342	PT S3 med.
1_CACGTGGCAAGCTCTA-1	0.0680407	PT S3 med.
1_CACGTTCCAGGAATCG-1	0.440987	PT S3 med.
1_CAGAGCCGTTGAGAGC-1	0.0924846	PT S3 med.
1_CAGATACCAGGAACCA-1	0.0471692	PT S3 med.
1_CAGATCAGTTCAACGT-1	0.197905	PT S3 med.
1_CAGCACGAGGTGCCAA-1	0.087511	PT S3 med.
1_CAGCACGCACCCGTAG-1	0.0637034	PT S3 med.
1_CAGCAGCCATATTCGG-1	0.0525284	PT S3 med.
1_CAGCCAGCACCCAAGC-1	0.0766721	PT S3 med.
1_CAGGCCAGTTCTCCAC-1	0.0607715	PT S3 med.
1_CAGGGCTAGCTGGCCT-1	0.101939	PT S3 med.
1_CAGTGCGGTCGTCATA-1	0.0816622	PT S3 med.
1_CAGTGCGTCCTATTGT-1	0.0825148	PT S3 med.
1_CATAAGCCATCACCAA-1	0.0379036	PT S3 med.
1_CATAAGCGTAGAGACC-1	0.0773838	PT S3 med.
1_CATAAGCGTGAGATCG-1	0.338587	PT S3 med.
1_CATACTTGTAGCTAAA-1	0.0625966	PT S3 med.
1_CATAGACAGCGCTGAA-1	0.0732941	PT S3 med.
1_CATCAAGAGCTCCCTT-1	0.0204664	PT S3 med.
1_CATCCCACACCAGCCA-1	0.0839706	PT S3 med.
1_CATCCGTGTGACAGGT-1	0.0683476	PT S3 med.
1_CATCGTCTCTCGTTTA-1	0.201129	PT S3 med.
1_CATGCCTAGTTGCGCC-1	0.054658	PT S3 med.
1_CATGCCTCAAGAGGCT-1	0.0853437	PT S3 med.
1_CATGCTCAGTATGTAG-1	0.113768	PT S3 med.
1_CATGGATGTATGTCAC-1	0.0856382	PT S3 med.
1_CATGGATGTTTCACAG-1	0.0752992	PT S3 med.
1_CATGGATTCCCATACC-1	0.095526	PT S3 med.
1_CATGGTAAGTACGAGC-1	0.0939406	PT S3 med.
1_CATGGTACAATGCAGG-1	0.0482397	PT S3 med.
1_CATGGTAGTATGAAAC-1	0.0653383	PT S3 med.
1_CATTCATGTCTTCGAA-1	0.0924694	PT S3 med.
1_CATTCATTCCTTACCG-1	0.0653425	PT S3 med.
1_CATTGAGTCAGTCTTT-1	0.269911	PT S3 med.
1_CATTGCCTCTGGGTCG-1	0.132027	PT S3 med.
1_CCAATTTGTAGAGACC-1	0.264793	PT S3 med.
1_CCACAAACATAGAAAC-1	0.065267	PT S3 med.
1_CCACGAGAGGAGTACC-1	0.0604892	PT S3 med.
1_CCACTTGAGAGAGCAA-1	0.0900236	PT S3 med.
1_CCACTTGAGTCAACAA-1	0.0376171	PT S3 med.
1_CCACTTGTCATAGCAC-1	0.086174	PT S3 med.
1_CCACTTGTCCACTGGG-1	0.0831997	PT S3 med.
1_CCATAAGAGCGAGAAA-1	0.0555278	PT S3 med.
1_CCCATTGAGCGTACAG-1	0.0701238	PT S3 med.
1_CCCATTGGTATATGGA-1	0.0863627	PT S3 med.
1_CCCGAAGGTCCAAATC-1	0.093095	PT S3 med.
1_CCCGGAAAGTGGAATT-1	0.0245078	PT S3 med.
1_CCCTAACAGAGAGGGC-1	0.0538804	PT S3 med.
1_CCCTAACCAATTGAGA-1	0.0502751	PT S3 med.
1_CCCTAACTCACGGGAA-1	0.02945	PT S3 med.
1_CCCTAACTCAGCGGAA-1	0.0753798	PT S3 med.
1_CCGAACGGTACTGAGG-1	0.158078	PT S3 med.
1_CCGATGGCACATGGTT-1	0.0738039	PT S3 med.
1_CCGCAAGCACGAAAGC-1	0.0330761	PT S3 med.
1_CCGGGTAGTAACCAGG-1	0.109779	PT S3 med.
1_CCGGGTATCGAGCCTG-1	0.0945082	PT S3 med.
1_CCGTAGGGTCAATGGG-1	0.106986	PT S3 med.
1_CCGTGAGCAAGAATGT-1	0.0805365	PT S3 med.
1_CCGTTCAGTCATATGC-1	0.0736021	PT S3 med.
1_CCTAACCTCGCCCAGA-1	0.0981033	PT S3 med.
1_CCTACGTCATGTACGT-1	0.115987	PT S3 med.
1_CCTCAGTAGCCTGAGA-1	0.0732018	PT S3 med.
1_CCTCATGGTGCGGCTT-1	0.0842443	PT S3 med.
1_CCTCCAACAAAGACTA-1	0.0532183	PT S3 med.
1_CCTCCTCAGGAATTAC-1	0.0847977	PT S3 med.
1_CCTCTAGTCCTGGCTT-1	0.0761052	PT S3 med.
1_CCTGCATAGGCATCAG-1	0.0830772	PT S3 med.
1_CCTGCATCAGCAGTGA-1	0.179196	PT S3 med.
1_CCTGTTGAGACCATGG-1	0.0160262	PT S3 med.
1_CGAAGGAAGATGGTAT-1	0.0768956	PT S3 med.
1_CGAAGTTGTTTCCATT-1	0.0711128	PT S3 med.
1_CGAAGTTTCCTGCCAT-1	0.111605	PT S3 med.
1_CGAATTGAGGCCCAAA-1	0.14152	PT S3 med.
1_CGAATTGGTATCGGTT-1	0.0630404	PT S3 med.
1_CGAATTGGTTCATCGA-1	0.0561015	PT S3 med.
1_CGACAGCCAAGTCCCG-1	0.0788734	PT S3 med.
1_CGAGGCTAGGCAGGGA-1	0.0789421	PT S3 med.
1_CGAGTTAAGATGCCGA-1	0.175871	PT S3 med.
1_CGAGTTATCCTTGACC-1	0.0878412	PT S3 med.
1_CGATGCGAGACACACG-1	0.224975	PT S3 med.
1_CGCAGGTTCTCAGAAC-1	0.095924	PT S3 med.
1_CGCATAAGTCCACATA-1	0.0498453	PT S3 med.
1_CGCATAATCTACCACC-1	0.102468	PT S3 med.
1_CGCGTGACAATTGCTG-1	0.0825827	PT S3 med.
1_CGGACACTCATACAGC-1	0.0851034	PT S3 med.
1_CGGAGAACACGTACAT-1	0.0948243	PT S3 med.
1_CGGTCAGCATGACTAC-1	0.0705706	PT S3 med.
1_CGTAAGTTCTGGAAGG-1	0.0991449	PT S3 med.
1_CGTAATGCACAGCGCT-1	0.100973	PT S3 med.
1_CGTCCATGTAACCAGG-1	0.0645688	PT S3 med.
1_CGTGAATCACCAAATC-1	0.0752939	PT S3 med.
1_CGTGATACAGTTGGTT-1	0.0897727	PT S3 med.
1_CGTGATAGTTTGATCG-1	0.0814029	PT S3 med.
1_CGTGTCTCAGAGAGGG-1	0.100634	PT S3 med.
1_CGTTGGGTCAGCGTCG-1	0.0993184	PT S3 med.
1_CTAACTTCATCGTTCC-1	0.104702	PT S3 med.
1_CTACCTGTCTAGGCCG-1	0.0411864	PT S3 med.
1_CTACTATCACTGGCGT-1	0.0906146	PT S3 med.
1_CTATCTAAGCAAGGAA-1	0.106732	PT S3 med.
1_CTATCTAGTATGTCAC-1	0.0681795	PT S3 med.
1_CTCAACCCAAGAAACT-1	0.202271	PT S3 med.
1_CTCAAGACAGGAATAT-1	0.138296	PT S3 med.
1_CTCAATTGTGTATTGC-1	0.0794449	PT S3 med.
1_CTCACTGAGGATTTCC-1	0.0747125	PT S3 med.
1_CTCATCGCATACAGCT-1	0.105628	PT S3 med.
1_CTCATCGGTAGTATAG-1	0.105297	PT S3 med.
1_CTCATTACATCAGTGT-1	0.079677	PT S3 med.
1_CTCCATGAGCACTCCG-1	0.151728	PT S3 med.
1_CTCTCAGCAACAAGTA-1	0.0786994	PT S3 med.
1_CTCTCAGTCGATACGT-1	0.0512944	PT S3 med.
1_CTCTGGTAGTAGGCCA-1	0.0607926	PT S3 med.
1_CTGAATGCACTATGTG-1	0.0828789	PT S3 med.
1_CTGAGCGAGCCACTCG-1	0.174739	PT S3 med.
1_CTGCATCCACATGTTG-1	0.0977897	PT S3 med.
1_CTGCATCCAGACCCGT-1	0.0719224	PT S3 med.
1_CTGCCTAAGGTACTGG-1	0.0882086	PT S3 med.
1_CTGGCAGCATGAGAAT-1	0.0658158	PT S3 med.
1_CTGTAGAGTCACCGCA-1	0.070177	PT S3 med.
1_CTGTAGAGTGAGCGAT-1	0.0799559	PT S3 med.
1_CTGTATTCAGCTATTG-1	0.0689851	PT S3 med.
1_CTGTGAACAAGTGCTT-1	0.0644744	PT S3 med.
1_CTTACCGAGCACCAGA-1	0.126607	PT S3 med.
1_CTTAGGATCGACATCA-1	0.101422	PT S3 med.
1_CTTCAATCATCACGGC-1	0.0555526	PT S3 med.
1_CTTCAATCATGACGGA-1	0.378065	PT S3 med.
1_CTTCCTTGTAACTTCG-1	0.0945143	PT S3 med.
1_CTTCGGTAGGTTAGTA-1	0.100014	PT S3 med.
1_CTTCGGTCACATCCCT-1	0.0868868	PT S3 med.
1_CTTCTAAGTAAGGTCG-1	0.0872323	PT S3 med.
1_CTTGAGACAAAGCTCT-1	0.103836	PT S3 med.
1_CTTGATTGTTAGAGAT-1	0.146937	PT S3 med.
1_CTTTCAACAGCCTACG-1	0.101453	PT S3 med.
1_CTTTCAACATACATCG-1	0.0878232	PT S3 med.
1_CTTTCGGAGCGTGAAC-1	0.131979	PT S3 med.
1_GAAACCTCAATAGTAG-1	0.0912384	PT S3 med.
1_GAACACTAGATCCCAT-1	0.450946	PT S3 med.
1_GAACACTCATTGTAGC-1	0.13964	PT S3 med.
1_GAACTGTAGATGTAGT-1	0.0855313	PT S3 med.
1_GAAGCCCTCAGACCGC-1	0.12401	PT S3 med.
1_GAAGGACCATAGAGGC-1	0.137798	PT S3 med.
1_GAAGGGTCAAGAATAC-1	0.108349	PT S3 med.
1_GAATAGATCCTATGGA-1	0.0709963	PT S3 med.
1_GAATCGTTCGGTTAGT-1	0.10228	PT S3 med.
1_GACACGCTCCTCAGAA-1	0.0780176	PT S3 med.
1_GACAGCCAGGATACGC-1	0.106037	PT S3 med.
1_GACATCAGTGTAGGAC-1	0.111954	PT S3 med.
1_GACCAATAGTGTACCT-1	0.110217	PT S3 med.
1_GACCCAGAGTGGTTCT-1	0.0647144	PT S3 med.
1_GACCCAGGTAGCTTAC-1	0.0858131	PT S3 med.
1_GACCCAGGTATTTCGG-1	0.100774	PT S3 med.
1_GACCCAGTCTAACGGT-1	0.094824	PT S3 med.
1_GACCTTCTCATCTCTA-1	0.0755005	PT S3 med.
1_GACCTTCTCGTCAAAC-1	0.0453963	PT S3 med.
1_GACGTTAGTGAGAGGG-1	0.0923286	PT S3 med.
1_GACGTTATCGGCATCG-1	0.0708215	PT S3 med.
1_GACTCAAAGGTCATTC-1	0.0751709	PT S3 med.
1_GACTCTCGTTGTATGC-1	0.0559262	PT S3 med.
1_GACTGATGTGGTCTAT-1	0.0957584	PT S3 med.
1_GAGACCCCACATGGTT-1	0.10248	PT S3 med.
1_GAGACCCGTATTTCGG-1	0.0376127	PT S3 med.
1_GAGATGGCATTGCAAC-1	0.10053	PT S3 med.
1_GAGCCTGGTTCGGTAT-1	0.0892247	PT S3 med.
1_GAGTCATAGCATGTTC-1	0.0743896	PT S3 med.
1_GAGTGAGCAATCCTAG-1	0.11017	PT S3 med.
1_GAGTGAGTCGCAATTG-1	0.0625352	PT S3 med.
1_GAGTTACAGTTTGAGA-1	0.0759781	PT S3 med.
1_GAGTTGTAGGCAATGC-1	0.0997841	PT S3 med.
1_GAGTTTGCACCCGTAG-1	0.074895	PT S3 med.
1_GATCACATCATGAGAA-1	0.103376	PT S3 med.
1_GATCACATCCCTTTGG-1	0.204633	PT S3 med.
1_GATCCCTAGTAGACCG-1	0.0591976	PT S3 med.
1_GATGCTACACGTCTCT-1	0.102917	PT S3 med.
1_GATGCTATCGTACCTC-1	0.112997	PT S3 med.
1_GATGGAGTCCTTTGAT-1	0.0808094	PT S3 med.
1_GATTCGAGTACTCCCT-1	0.109166	PT S3 med.
1_GATTGGTGTGTATACC-1	0.0992702	PT S3 med.
1_GATTTCTAGCCTGAGA-1	0.110601	PT S3 med.
1_GCAACCGCACGACGTC-1	0.0948187	PT S3 med.
1_GCACGTGGTCAGACTT-1	0.129852	PT S3 med.
1_GCACTAAGTAGGATAT-1	0.143514	PT S3 med.
1_GCAGCCAAGCGTGCTC-1	0.109334	PT S3 med.
1_GCAGTTAAGACGGTTG-1	0.111521	PT S3 med.
1_GCAGTTACACACACTA-1	0.380944	PT S3 med.
1_GCAGTTAGTTCCGTTC-1	0.101896	PT S3 med.
1_GCATTAGAGGTCTGGA-1	0.103283	PT S3 med.
1_GCATTAGTCCCTCATG-1	0.193768	PT S3 med.
1_GCCAACGAGCATTGAA-1	0.134119	PT S3 med.
1_GCCATTCTCTCCTACG-1	0.126845	PT S3 med.
1_GCCCAGACAGCAGGAT-1	0.0897101	PT S3 med.
1_GCCCGAAAGTTGAAGT-1	0.102651	PT S3 med.
1_GCCGATGTCCCGAGTG-1	0.0364919	PT S3 med.
1_GCGGAAACAAATGCTC-1	0.104372	PT S3 med.
1_GCGGAAATCACTTGGA-1	0.28973	PT S3 med.
1_GCGGATCAGCCGATAG-1	0.0713654	PT S3 med.
1_GCGGATCCAGCGGTCT-1	0.0896024	PT S3 med.
1_GCGTTTCAGACGTCCC-1	0.133224	PT S3 med.
1_GCTACCTAGGTAAACT-1	0.0708083	PT S3 med.
1_GCTCAAAAGCTGGCCT-1	0.0657899	PT S3 med.
1_GCTCAAAAGTGGTGAC-1	0.0720558	PT S3 med.
1_GCTGCAGGTTCCTAGA-1	0.143665	PT S3 med.
1_GCTTTCGGTGTATACC-1	0.053679	PT S3 med.
1_GGAACCCGTTGCTCGG-1	0.100366	PT S3 med.
1_GGAAGTGTCGAGATAA-1	0.0787914	PT S3 med.
1_GGAATCTTCTGCACCT-1	0.0955318	PT S3 med.
1_GGAGGTAAGTATAGGT-1	0.0792148	PT S3 med.
1_GGATCTATCACCGCTT-1	0.0808973	PT S3 med.
1_GGCTTGGAGCAAGTCG-1	0.0931458	PT S3 med.
1_GGCTTGGCAATCCTAG-1	0.0540784	PT S3 med.
1_GGCTTTCTCCATAAGC-1	0.107722	PT S3 med.
1_GGGAGTACAAGTCCCG-1	0.0745744	PT S3 med.
1_GGGAGTAGTGCCCACA-1	0.096642	PT S3 med.
1_GGGATCCTCGAACCAT-1	0.0915484	PT S3 med.
1_GGGATCCTCTTAATCC-1	0.0994063	PT S3 med.
1_GGGATGATCTGGAGAG-1	0.098933	PT S3 med.
1_GGGCCATCACTAACGT-1	0.104993	PT S3 med.
1_GGGCCATCACTAGGTT-1	0.0878205	PT S3 med.
1_GGGCCATTCTCGGCTT-1	0.0875334	PT S3 med.
1_GGGTATTTCACGAACT-1	0.0997505	PT S3 med.
1_GGGTCACAGAACCGCA-1	0.190806	PT S3 med.
1_GGGTCTGCATGTCTAG-1	0.0938519	PT S3 med.
1_GGGTCTGGTTGGGATG-1	0.0616862	PT S3 med.
1_GGGTGAACAAATGGAT-1	0.0676013	PT S3 med.
1_GGGTGAACACCACTGG-1	0.0928256	PT S3 med.
1_GGGTGAAGTAGGAAAG-1	0.0232138	PT S3 med.
1_GGGTGTCTCGTCGACG-1	0.095209	PT S3 med.
1_GGTAACTGTGAACTAA-1	0.141984	PT S3 med.
1_GGTAATCAGAGCATAT-1	0.0815649	PT S3 med.
1_GGTAGAGTCGCCGATG-1	0.0849039	PT S3 med.
1_GGTCACGGTAGAGCTG-1	0.0339301	PT S3 med.
1_GGTCACGTCTCACTCG-1	0.0349694	PT S3 med.
1_GGTCTGGCACACCAGC-1	0.097259	PT S3 med.
1_GGTGAAGAGTAAGGGA-1	0.0525052	PT S3 med.
1_GGTGATTAGTAACAGT-1	0.0909591	PT S3 med.
1_GGTGATTCACTGCACG-1	0.15491	PT S3 med.
1_GGTGATTGTCCGACGT-1	0.0674238	PT S3 med.
1_GGTGTCGGTAATTGGA-1	0.0768677	PT S3 med.
1_GGTGTTAGTGCCCACA-1	0.0681293	PT S3 med.
1_GGTGTTATCCATTTGT-1	0.143507	PT S3 med.
1_GGTTCTCCAGGATCTT-1	0.0930681	PT S3 med.
1_GTAACACAGGCTCCCA-1	0.0714777	PT S3 med.
1_GTAAGTCTCCTGTACC-1	0.0933835	PT S3 med.
1_GTAATCGTCCTTCGAC-1	0.0296299	PT S3 med.
1_GTACAACGTGTTCCTC-1	0.0835355	PT S3 med.
1_GTACAGTCAAGTAGTA-1	0.103749	PT S3 med.
1_GTAGAAACAGCTACTA-1	0.0958257	PT S3 med.
1_GTAGAAATCGTCAGAT-1	0.0993904	PT S3 med.
1_GTAGATCGTAGACTGG-1	0.0386155	PT S3 med.
1_GTAGGAGGTGATTGGG-1	0.0462529	PT S3 med.
1_GTCAAGTCAAGACAAT-1	0.11976	PT S3 med.
1_GTCACGGCACAAGTGG-1	0.102297	PT S3 med.
1_GTCAGCGCAAGCCATT-1	0.106836	PT S3 med.
1_GTCATCCAGTCGGCCT-1	0.0548851	PT S3 med.
1_GTCATGATCTGCGGAC-1	0.0598772	PT S3 med.
1_GTCATTTTCCAATCCC-1	0.0961873	PT S3 med.
1_GTCGCGATCTGTCAGA-1	0.0870232	PT S3 med.
1_GTCTACCAGTGCAACG-1	0.0834813	PT S3 med.
1_GTCTGTCGTTGCCGCA-1	0.109687	PT S3 med.
1_GTGAGCCAGAGAATCT-1	0.106855	PT S3 med.
1_GTGAGGAGTCACCGCA-1	0.0875093	PT S3 med.
1_GTGAGTTAGCTACGTT-1	0.0641877	PT S3 med.
1_GTGAGTTGTAACAGTA-1	0.0511149	PT S3 med.
1_GTGGAAGAGAGGTTTA-1	0.112392	PT S3 med.
1_GTGGAGAAGATACGAT-1	0.0136456	PT S3 med.
1_GTGGAGAAGGATTCCT-1	0.0925897	PT S3 med.
1_GTGGGAATCTCATTAC-1	0.0446811	PT S3 med.
1_GTGTAACCAAGAGCTG-1	0.205675	PT S3 med.
1_GTGTAACTCCTTATCA-1	0.065371	PT S3 med.
1_GTGTGATGTGGATTTC-1	0.123039	PT S3 med.
1_GTGTTAGGTCCCAAAT-1	0.063501	PT S3 med.
1_GTGTTCCAGGCCTTGC-1	0.110942	PT S3 med.
1_GTTACCCAGCTAGAGC-1	0.110816	PT S3 med.
1_GTTACCCCAGCGGATA-1	0.167366	PT S3 med.
1_GTTAGACCACTGGACC-1	0.0926448	PT S3 med.
1_GTTAGACCACTGTGTA-1	0.0867812	PT S3 med.
1_GTTAGACTCTGCATGA-1	0.260279	PT S3 med.
1_GTTATGGCAATACGCT-1	0.102561	PT S3 med.
1_GTTCATTTCTTTCGAT-1	0.0984423	PT S3 med.
1_GTTCTATTCTGCACCT-1	0.0986415	PT S3 med.
1_GTTGCGGTCTGCCTGT-1	0.0660608	PT S3 med.
1_GTTGCTCAGCTGACTT-1	0.0965421	PT S3 med.
1_GTTGTAGGTCTGCAAT-1	0.0876668	PT S3 med.
1_GTTTGGAGTACCTTCC-1	0.178438	PT S3 med.
1_GTTTGGAGTACGATTC-1	0.0992942	PT S3 med.
1_TAACGACAGATGCTAA-1	0.126535	PT S3 med.
1_TAAGCGTAGGAATCGC-1	0.124643	PT S3 med.
1_TAAGTCGGTACCCGAC-1	0.0837907	PT S3 med.
1_TAATTCCCAGGTACGA-1	0.0748192	PT S3 med.
1_TAATTCCGTGGACCTC-1	0.0445154	PT S3 med.
1_TAATTCCTCTGATTCT-1	0.11935	PT S3 med.
1_TACAACGCATTACGGT-1	0.177084	PT S3 med.
1_TACATTCAGTGCAGGT-1	0.0528618	PT S3 med.
1_TACCCACTCCTCTGCA-1	0.099106	PT S3 med.
1_TACCCGTCAATAAGGT-1	0.102867	PT S3 med.
1_TACCCGTCAGCAGTAG-1	0.0869829	PT S3 med.
1_TACCCGTCATTGCCTC-1	0.297988	PT S3 med.
1_TACGGTAGTATTTCCT-1	0.0874925	PT S3 med.
1_TACTTCAAGAAGTCAT-1	0.0899809	PT S3 med.
1_TAGACCACAGGCCCTA-1	0.0784192	PT S3 med.
1_TAGCACACAATAGTAG-1	0.053093	PT S3 med.
1_TAGGGTTGTCCAATCA-1	0.501026	PT S3 med.
1_TAGGGTTGTCGATGCC-1	0.0734465	PT S3 med.
1_TAGTGCATCTAAGCCA-1	0.0650624	PT S3 med.
1_TATACCTAGAACCGCA-1	0.100694	PT S3 med.
1_TATACCTGTGCCGGTT-1	0.111732	PT S3 med.
1_TATATCCGTTCAACGT-1	0.108996	PT S3 med.
1_TATCAGGGTAGCTGAG-1	0.0889347	PT S3 med.
1_TATCAGGGTTCGGGTC-1	0.0638493	PT S3 med.
1_TATCGCCAGCACTTTG-1	0.0335858	PT S3 med.
1_TATCGCCGTAAGTAGT-1	0.0716779	PT S3 med.
1_TATCTTGCATCGATAC-1	0.0652677	PT S3 med.
1_TCAAGCACAGATACTC-1	0.0720828	PT S3 med.
1_TCAATCTCAGTTGAAA-1	0.0869261	PT S3 med.
1_TCAATTCTCCGCAAAT-1	0.0748208	PT S3 med.
1_TCACATTTCTGGCCTT-1	0.0918555	PT S3 med.
1_TCACGCTTCGCGTGCA-1	0.0744727	PT S3 med.
1_TCACTATCAGCGCTTG-1	0.0973512	PT S3 med.
1_TCACTATGTCCCGCAA-1	0.107198	PT S3 med.
1_TCAGCCTAGATGAACT-1	0.0847288	PT S3 med.
1_TCAGGGCGTTGGACCC-1	0.115329	PT S3 med.
1_TCATCCGTCAATGTCG-1	0.152175	PT S3 med.
1_TCATGAGGTGAATAAC-1	0.144171	PT S3 med.
1_TCATGAGTCGCTACGG-1	0.100998	PT S3 med.
1_TCATGAGTCTTGAACG-1	0.0949047	PT S3 med.
1_TCATGCCCAAGCACCC-1	0.0498415	PT S3 med.
1_TCATGTTGTGGTCCCA-1	0.0868329	PT S3 med.
1_TCATTACTCTGCTTAT-1	0.0989026	PT S3 med.
1_TCATTGTCAAAGGCTG-1	0.0922784	PT S3 med.
1_TCCACGTAGAAGGCTC-1	0.0685838	PT S3 med.
1_TCCACGTAGTTGGCTT-1	0.0960461	PT S3 med.
1_TCCATCGCATGCGGTC-1	0.0534407	PT S3 med.
1_TCCCACAAGGGAGTTC-1	0.0672113	PT S3 med.
1_TCCCACACACAGAGAC-1	0.0597016	PT S3 med.
1_TCCCACACAGGAATCG-1	0.256582	PT S3 med.
1_TCCCAGTAGGTCCGAA-1	0.13254	PT S3 med.
1_TCCCATGGTAACTAAG-1	0.0703794	PT S3 med.
1_TCCCATGTCAGCTTGA-1	0.0617846	PT S3 med.
1_TCCGATCTCTCTGCTG-1	0.0916437	PT S3 med.
1_TCCGGGAAGGATTTAG-1	0.0821197	PT S3 med.
1_TCCGTGTCAACCACAT-1	0.0752339	PT S3 med.
1_TCCTAATGTCAAGTTC-1	0.0812105	PT S3 med.
1_TCCTCCCGTACGAGTG-1	0.0822461	PT S3 med.
1_TCCTCTTTCAACCCGG-1	0.103829	PT S3 med.
1_TCCTTCTAGTGCTCAT-1	0.09176	PT S3 med.
1_TCGAACAAGGGAGAAT-1	0.0640224	PT S3 med.
1_TCGACCTCAGTACTAC-1	0.103369	PT S3 med.
1_TCGACGGGTAGATTGA-1	0.0636902	PT S3 med.
1_TCGCACTCAGCTGGTC-1	0.267021	PT S3 med.
1_TCGCACTTCTGTGCTC-1	0.0676152	PT S3 med.
1_TCGCTCACATGTTTGG-1	0.0817268	PT S3 med.
1_TCGCTTGAGGTAGATT-1	0.074789	PT S3 med.
1_TCGCTTGCAAGTGATA-1	0.107779	PT S3 med.
1_TCGCTTGCACTCTAGA-1	0.209193	PT S3 med.
1_TCGCTTGCAGCGGTCT-1	0.0867486	PT S3 med.
1_TCGTGCTAGCCACAAG-1	0.060392	PT S3 med.
1_TCGTGCTGTCCTCAGG-1	0.111744	PT S3 med.
1_TCTAACTTCTCTTGCG-1	0.0928442	PT S3 med.
1_TCTATCACAGCACACC-1	0.157684	PT S3 med.
1_TCTCACGAGCAGCGAT-1	0.0836887	PT S3 med.
1_TCTCACGTCCTGCCAT-1	0.0678983	PT S3 med.
1_TCTGGCTCAATACAGA-1	0.0874347	PT S3 med.
1_TCTTGCGAGAAATCCA-1	0.02859	PT S3 med.
1_TCTTGCGTCTCGGTAA-1	0.246865	PT S3 med.
1_TGAACGTGTACAAGTA-1	0.0514596	PT S3 med.
1_TGAATCGAGGGCAATC-1	0.211679	PT S3 med.
1_TGAATCGCAAATGAGT-1	0.0788437	PT S3 med.
1_TGAATGCCAGATCATC-1	0.0715919	PT S3 med.
1_TGACAGTCATCTTTCA-1	0.118512	PT S3 med.
1_TGACAGTCATGTGACT-1	0.0599319	PT S3 med.
1_TGACCCTGTTAACCTG-1	0.0729443	PT S3 med.
1_TGACGCGAGCATGGGT-1	0.335044	PT S3 med.
1_TGACTCCTCTTCCGTG-1	0.0998159	PT S3 med.
1_TGAGGTTAGAGTTGTA-1	0.093205	PT S3 med.
1_TGAGTCATCACATTGG-1	0.089822	PT S3 med.
1_TGATCTTAGTAAATGC-1	0.08608	PT S3 med.
1_TGATCTTGTATGCGTT-1	0.0750993	PT S3 med.
1_TGATCTTGTCTGTAAC-1	0.10882	PT S3 med.
1_TGATGGTTCTCAGGCG-1	0.0889347	PT S3 med.
1_TGATTTCAGTTCACTG-1	0.0784034	PT S3 med.
1_TGATTTCGTAAGATAC-1	0.0914007	PT S3 med.
1_TGCACGGTCGTCTACC-1	0.109466	PT S3 med.
1_TGCAGATGTTATAGAG-1	0.0506741	PT S3 med.
1_TGCAGGCGTTGCCATA-1	0.0872682	PT S3 med.
1_TGCATCCCACAAGGTG-1	0.110867	PT S3 med.
1_TGCATCCGTTCGTTCC-1	0.135968	PT S3 med.
1_TGCATCCTCACACCCT-1	0.114177	PT S3 med.
1_TGCCGAGTCTGCGGGT-1	0.0966972	PT S3 med.
1_TGCGATAGTCTACTGA-1	0.0892145	PT S3 med.
1_TGCTCGTCATTCAGCA-1	0.066031	PT S3 med.
1_TGCTCGTTCCACGGAC-1	0.11175	PT S3 med.
1_TGCTTCGGTTTGGGAG-1	0.0917634	PT S3 med.
1_TGGAGAGTCGGTCATA-1	0.20476	PT S3 med.
1_TGGAGGACATGACCCG-1	0.0481399	PT S3 med.
1_TGGCGTGTCACTCACC-1	0.203006	PT S3 med.
1_TGGGAAGCAGAACATA-1	0.0937223	PT S3 med.
1_TGGGAAGTCGGCAGTC-1	0.136053	PT S3 med.
1_TGGGAGATCTATCGCC-1	0.102532	PT S3 med.
1_TGGGATTAGTGTAGTA-1	0.0486233	PT S3 med.
1_TGGGATTGTTGCTCAA-1	0.0871485	PT S3 med.
1_TGGGTTACATCCGGCA-1	0.0605204	PT S3 med.
1_TGGGTTAGTACGATTC-1	0.0899778	PT S3 med.
1_TGGTAGTAGTACTGTC-1	0.0970485	PT S3 med.
1_TGGTAGTTCCCGTTGT-1	0.108469	PT S3 med.
1_TGGTTAGAGGGTTTCT-1	0.0852851	PT S3 med.
1_TGGTTAGCACGACGTC-1	0.0964132	PT S3 med.
1_TGTACAGGTCGACTTA-1	0.038533	PT S3 med.
1_TGTCCCAAGATACATG-1	0.117325	PT S3 med.
1_TGTGAGTAGATTCGCT-1	0.069925	PT S3 med.
1_TGTGATGCAGTATTCG-1	0.0692446	PT S3 med.
1_TGTGATGTCACATACG-1	0.0842667	PT S3 med.
1_TGTGCGGGTGTTCAGT-1	0.11101	PT S3 med.
1_TGTGGCGGTCGCTTGG-1	0.0592864	PT S3 med.
1_TGTGGCGTCACATTGG-1	0.070758	PT S3 med.
1_TGTGGCGTCCGTGGGT-1	0.0868405	PT S3 med.
1_TGTGTGAAGTGAGCCA-1	0.0799734	PT S3 med.
1_TGTTCATTCTTCTTCC-1	0.0950334	PT S3 med.
1_TGTTGAGCACCAACAT-1	0.0477583	PT S3 med.
1_TTACTGTGTCGTGTTA-1	0.0575797	PT S3 med.
1_TTAGGGTGTTCTCCAC-1	0.0625983	PT S3 med.
1_TTAGGGTTCTGCACCT-1	0.046602	PT S3 med.
1_TTAGTCTCAGAGTAAT-1	0.119708	PT S3 med.
1_TTATTGCAGTCACTCA-1	0.0720563	PT S3 med.
1_TTATTGCTCGTCTAAG-1	0.108456	PT S3 med.
1_TTCATGTAGCAAATCA-1	0.073534	PT S3 med.
1_TTCATTGTCTTGCGCT-1	0.0810291	PT S3 med.
1_TTCCACGCACATACGT-1	0.0755402	PT S3 med.
1_TTCCACGCAGTTGAAA-1	0.0903241	PT S3 med.
1_TTCCACGTCGTGGGAA-1	0.0948785	PT S3 med.
1_TTCCTTCGTTACGATC-1	0.0569809	PT S3 med.
1_TTCGGTCAGGGCCAAT-1	0.0973306	PT S3 med.
1_TTCGGTCAGTAAGAGG-1	0.0784501	PT S3 med.
1_TTCTTCCTCGTAGAGG-1	0.07503	PT S3 med.
1_TTCTTGAAGGATTTAG-1	0.0768959	PT S3 med.
1_TTCTTGAGTATTGACC-1	0.0795274	PT S3 med.
1_TTGAGTGTCATTTGTC-1	0.12093	PT S3 med.
1_TTGCGTCCACTCCGGA-1	0.0520566	PT S3 med.
1_TTGCTGCAGCTACTGT-1	0.0393703	PT S3 med.
1_TTGCTGCAGTGTGTTC-1	0.106822	PT S3 med.
1_TTGGATGAGTGAATAC-1	0.107983	PT S3 med.
1_TTGGATGTCAAGTAAG-1	0.0720659	PT S3 med.
1_TTGGGATAGTTTCGAC-1	0.0726042	PT S3 med.
1_TTGGGTAAGGCAGGGA-1	0.118373	PT S3 med.
1_TTGGTTTAGACGATAT-1	0.253894	PT S3 med.
1_TTGTGGACAACAGTGG-1	0.0917745	PT S3 med.
1_TTGTGTTCAGCAGTTT-1	0.100997	PT S3 med.
1_TTGTTCAGTTGTTGAC-1	0.0941788	PT S3 med.
1_TTGTTTGGTCGACTGC-1	0.075084	PT S3 med.
1_TTTACGTTCCAAACCA-1	0.0272501	PT S3 med.
1_TTTATGCCAAATGGTA-1	0.0896279	PT S3 med.
1_TTTATGCCATCCTCAC-1	0.0760566	PT S3 med.
1_TTTCACAAGCAGGGAG-1	0.260024	PT S3 med.
1_TTTCACATCATAGACC-1	0.0784335	PT S3 med.
1_TTTCAGTCAAAGGGCT-1	0.0448087	PT S3 med.
1_TTTCCTCTCTGTCCCA-1	0.109424	PT S3 med.
1_TTTGACTCATAAGCAA-1	0.202441	PT S3 med.
1_TTTGATCGTCAGATTC-1	0.10453	PT S3 med.
1_TTTGGAGCAACTGTGT-1	0.0971542	PT S3 med.
1_TTTGGAGCATATCGGT-1	0.0293259	PT S3 med.
1_TTTGGAGTCGTGCAGC-1	0.0659682	PT S3 med.
1_TTTGGTTAGCTGAAGC-1	0.087794	PT S3 med.
2_AAACGAATCTCTCGAC-1	0.840886	PT S3 med.
2_AAAGGGCTCGGTGCAC-1	0.834509	PT S3 med.
2_AACCAACAGCGTCAAG-1	0.828538	PT S3 med.
2_AACCAACAGTGAGTTA-1	0.856652	PT S3 med.
2_AACCATGAGACCTCCG-1	0.834741	PT S3 med.
2_AACGAAATCGTTCGCT-1	0.815313	PT S3 med.
2_AACGAAATCTCGTTTA-1	0.824774	PT S3 med.
2_AAGATAGTCCTGCCAT-1	0.804564	PT S3 med.
2_AAGCATCTCTTTCTAG-1	0.818994	PT S3 med.
2_AAGGTAAAGTACCATC-1	0.844798	PT S3 med.
2_AATCACGCAAGATCCT-1	0.834165	PT S3 med.
2_AATTCCTCAGGTGGAT-1	0.850632	PT S3 med.
2_ACAAAGAAGTATTGCC-1	0.831104	PT S3 med.
2_ACACAGTGTGGATCAG-1	0.842564	PT S3 med.
2_ACACCAAAGTTCCTGA-1	0.810059	PT S3 med.
2_ACAGGGATCACTACTT-1	0.82627	PT S3 med.
2_ACCTGTCGTGCCTATA-1	0.832124	PT S3 med.
2_ACGGAAGAGCTCTATG-1	0.832804	PT S3 med.
2_ACTATCTGTCTTTCAT-1	0.835929	PT S3 med.
2_ACTGTCCGTTACGGAG-1	0.847561	PT S3 med.
2_AGGCTGCAGTACAGAT-1	0.84358	PT S3 med.
2_AGGGCTCTCTGTACAG-1	0.832395	PT S3 med.
2_AGGTTGTGTGCATTAC-1	0.856759	PT S3 med.
2_AGTCAACGTAACATCC-1	0.843676	PT S3 med.
2_ATAGAGAGTGTCATCA-1	0.837834	PT S3 med.
2_ATCAGGTAGTGTACAA-1	0.84486	PT S3 med.
2_ATCAGGTGTTTGAAAG-1	0.803644	PT S3 med.
2_ATCAGGTTCACTTCTA-1	0.817869	PT S3 med.
2_ATGCCTCTCGACCTAA-1	0.854865	PT S3 med.
2_ATGGGTTTCGAACACT-1	0.83206	PT S3 med.
2_ATGGTTGGTATGGTTC-1	0.801795	PT S3 med.
2_CAACGGCAGGTCTACT-1	0.806272	PT S3 med.
2_CACTTCGTCAGTGTCA-1	0.8302	PT S3 med.
2_CAGATACGTGATTAGA-1	0.826674	PT S3 med.
2_CAGCGTGAGGCGCTTC-1	0.822356	PT S3 med.
2_CATACCCCATTGTAGC-1	0.834647	PT S3 med.
2_CATCGGGCACGTATAC-1	0.859389	PT S3 med.
2_CCTCATGCATCCTCAC-1	0.431976	PT S3 med.
2_CCTTCAGGTCGAGTGA-1	0.81152	PT S3 med.
2_CGAAGGATCTTCGGTC-1	0.824405	PT S3 med.
2_CGAAGTTGTAACAGTA-1	0.838025	PT S3 med.
2_CGAAGTTTCGCAGTTA-1	0.832751	PT S3 med.
2_CGAATTGCACCTGCAG-1	0.758841	PT S3 med.
2_CGATGCGGTAGAGTTA-1	0.824121	PT S3 med.
2_CGGAACCTCCTTGACC-1	0.852548	PT S3 med.
2_CGGACACGTAGTGCGA-1	0.82308	PT S3 med.
2_CGTGAATCACAAATCC-1	0.819944	PT S3 med.
2_CGTTCTGAGTCAGGGT-1	0.815339	PT S3 med.
2_CTACCTGAGCACGATG-1	0.86421	PT S3 med.
2_CTACCTGCAACGTAAA-1	0.848968	PT S3 med.
2_CTAGACATCGAAGCAG-1	0.831673	PT S3 med.
2_CTATCCGGTCACTCAA-1	0.815951	PT S3 med.
2_CTCCGATGTACGTAGG-1	0.843814	PT S3 med.
2_CTGATCCTCCCAGGAC-1	0.84748	PT S3 med.
2_CTGCATCAGCGTGAAC-1	0.839061	PT S3 med.
2_CTGGCAGAGTGAGTTA-1	0.826327	PT S3 med.
2_CTGGCAGGTACGTGTT-1	0.826778	PT S3 med.
2_CTGGTCTCATTCTTCA-1	0.833361	PT S3 med.
2_CTGTAGAGTCCTGTTC-1	0.835648	PT S3 med.
2_CTGTCGTTCCTCATAT-1	0.7991	PT S3 med.
2_GAAACCTGTACAGTTC-1	0.837527	PT S3 med.
2_GAAGTAATCGAACGGA-1	0.823182	PT S3 med.
2_GAATCACTCATGGGAG-1	0.839306	PT S3 med.
2_GACCCAGGTGACACGA-1	0.808805	PT S3 med.
2_GAGGGATCAAGAGAGA-1	0.830944	PT S3 med.
2_GAGTGTTAGAATTGCA-1	0.836246	PT S3 med.
2_GAGTTGTAGCAATTAG-1	0.830864	PT S3 med.
2_GAGTTTGCAAGCGATG-1	0.787598	PT S3 med.
2_GATGTTGCACAATGTC-1	0.836062	PT S3 med.
2_GATTCTTCAGACCAAG-1	0.83639	PT S3 med.
2_GCAACCGAGATCCAAA-1	0.846813	PT S3 med.
2_GCACGGTTCGCATGAT-1	0.838193	PT S3 med.
2_GCACTAAAGCGTTGTT-1	0.838909	PT S3 med.
2_GCATGATTCATCAGTG-1	0.829654	PT S3 med.
2_GCATTAGGTTGTGGAG-1	0.828012	PT S3 med.
2_GCCAGGTAGCGTTCAT-1	0.832533	PT S3 med.
2_GCCGTGACAAGATTGA-1	0.818759	PT S3 med.
2_GCTGCAGAGTTCATGC-1	0.842154	PT S3 med.
2_GGAGCAACATCCAATG-1	0.836036	PT S3 med.
2_GGGTCTGCAATGGCAG-1	0.841903	PT S3 med.
2_GGTGTCGCAAGGAGTC-1	0.852233	PT S3 med.
2_GTAGCTAAGTTGCCCG-1	0.839503	PT S3 med.
2_GTGGTTAGTTCCGCAG-1	0.837549	PT S3 med.
2_GTTACGATCGGACCAC-1	0.832158	PT S3 med.
2_GTTCCGTTCGCTATTT-1	0.831124	PT S3 med.
2_TACCTCGCAAAGGGTC-1	0.865092	PT S3 med.
2_TACGGTACACAGTACT-1	0.84671	PT S3 med.
2_TAGACCACAAACTCTG-1	0.81535	PT S3 med.
2_TATATCCTCAAACTGC-1	0.833396	PT S3 med.
2_TCACGGGAGCTGTGCC-1	0.86264	PT S3 med.
2_TCAGCCTGTATCTTCT-1	0.849178	PT S3 med.
2_TCAGGTAAGGTTCTTG-1	0.855713	PT S3 med.
2_TCATGGACACTCCGGA-1	0.843421	PT S3 med.
2_TCATTGTTCGCGTCGA-1	0.850167	PT S3 med.
2_TCCACCACACGACGCT-1	0.83513	PT S3 med.
2_TCCACCAGTCACCACG-1	0.838494	PT S3 med.
2_TCCACGTAGGTCCGAA-1	0.831742	PT S3 med.
2_TCCCATGCAAGTACCT-1	0.831454	PT S3 med.
2_TCCTCGAGTAAGTCAA-1	0.866213	PT S3 med.
2_TCCTTCTAGGGAGTTC-1	0.833623	PT S3 med.
2_TCGGGACCACCCTTAC-1	0.835259	PT S3 med.
2_TCGTAGAAGCTTTGTG-1	0.839929	PT S3 med.
2_TCTACATTCTAGTGAC-1	0.815006	PT S3 med.
2_TCTCACGGTTACCTTT-1	0.821702	PT S3 med.
2_TGACAGTTCAGCATTG-1	0.820238	PT S3 med.
2_TGAGTCATCATTGTTC-1	0.842991	PT S3 med.
2_TGATCTTGTACCCGAC-1	0.849301	PT S3 med.
2_TGCAGTACAATGTCTG-1	0.841953	PT S3 med.
2_TGCGATACAATGGGTG-1	0.836515	PT S3 med.
2_TGCGGCAGTACCACGC-1	0.847826	PT S3 med.
2_TGCGGCAGTGTATACC-1	0.830236	PT S3 med.
2_TGTAACGTCCGTAATG-1	0.758337	PT S3 med.
2_TTACGTTCACTGGCGT-1	0.850448	PT S3 med.
2_TTCACGCGTAGACTGG-1	0.844482	PT S3 med.
2_TTCCGGTGTGTCATGT-1	0.840906	PT S3 med.
2_TTCCTAAGTCACGACC-1	0.837937	PT S3 med.
2_TTCTAGTAGTAGTGCG-1	0.84028	PT S3 med.
2_TTGGGATTCGGTATGT-1	0.824175	PT S3 med.
2_TTGGTTTTCAACTGGT-1	0.819926	PT S3 med.
2_TTGTTCACATTCTGTT-1	0.847957	PT S3 med.
2_TTGTTTGTCTTAGTTC-1	0.8401	PT S3 med.
2_TTTGGTTCAGAAGCGT-1	0.835216	PT S3 med.
2_TTTGTTGTCTAAACGC-1	0.829353	PT S3 med.
3_AAAGAACCAGTCAACT-1	0.734874	PT S3 med.
3_AAAGGGCCAACTCATG-1	0.733406	PT S3 med.
3_AAAGTGAAGCTGCCAC-1	0.710391	PT S3 med.
3_AACAGGGCAACATCGT-1	0.746135	PT S3 med.
3_AACCATGGTATTGCCA-1	0.754456	PT S3 med.
3_AACCCAAAGACGTCCC-1	0.739037	PT S3 med.
3_AACCTTTAGCACTTTG-1	0.766341	PT S3 med.
3_AACGGGACAAGCGCAA-1	0.734493	PT S3 med.
3_AACTTCTAGAGATTCA-1	0.730175	PT S3 med.
3_AAGAACAGTAGACACG-1	0.73852	PT S3 med.
3_AAGGAATAGCGCAATG-1	0.717664	PT S3 med.
3_AAGTACCGTGTTAACC-1	0.726032	PT S3 med.
3_AATCGACTCGTGCATA-1	0.74128	PT S3 med.
3_AATGAAGCACTCTGCT-1	0.742576	PT S3 med.
3_AATGAAGGTGGAAATT-1	0.715778	PT S3 med.
3_AATGCCAGTGGCTGAA-1	0.76801	PT S3 med.
3_ACAACCATCGCCTTTG-1	0.824613	PT S3 med.
3_ACAAGCTCAGCACAGA-1	0.715888	PT S3 med.
3_ACGTAGTTCTGAGCAT-1	0.742121	PT S3 med.
3_ACTACGAAGCGTCGAA-1	0.745287	PT S3 med.
3_ACTATCTCAGAACGCA-1	0.685175	PT S3 med.
3_ACTGTCCTCTCGTCGT-1	0.738265	PT S3 med.
3_ACTTTGTAGGTATAGT-1	0.721527	PT S3 med.
3_ACTTTGTAGTGGCCTC-1	0.73603	PT S3 med.
3_AGAAGTAGTGCTAGCC-1	0.717352	PT S3 med.
3_AGATGCTCAGTAGTGG-1	0.734031	PT S3 med.
3_AGCATCAGTCCCTGAG-1	0.774031	PT S3 med.
3_AGCGATTCATCTTAGG-1	0.744772	PT S3 med.
3_AGCGCCATCCGATGCG-1	0.73028	PT S3 med.
3_AGGACGAGTCAGGCAA-1	0.747027	PT S3 med.
3_AGGAGGTGTTCGGGTC-1	0.756555	PT S3 med.
3_AGGATCTTCCACGTCT-1	0.716913	PT S3 med.
3_AGGCTGCCAGCCATTA-1	0.761835	PT S3 med.
3_AGGGTCCAGGGCCAAT-1	0.729959	PT S3 med.
3_AGTGATCTCCGCTGTT-1	0.749915	PT S3 med.
3_AGTGTTGCAGCGCGTT-1	0.712728	PT S3 med.
3_ATAGAGACAACAACAA-1	0.713045	PT S3 med.
3_ATATCCTCATGCCGAC-1	0.733101	PT S3 med.
3_ATCCACCGTCTTCATT-1	0.758048	PT S3 med.
3_ATCGATGTCGTGTTCC-1	0.727705	PT S3 med.
3_ATCGGCGGTCTGATAC-1	0.718512	PT S3 med.
3_ATGCATGAGTAATCCC-1	0.727884	PT S3 med.
3_ATTTACCTCATGGGAG-1	0.778116	PT S3 med.
3_ATTTCTGAGCAATAAC-1	0.729016	PT S3 med.
3_ATTTCTGTCTTCGACC-1	0.761298	PT S3 med.
3_CAACGATAGGTATTGA-1	0.743989	PT S3 med.
3_CAAGACTTCCTAAGTG-1	0.740402	PT S3 med.
3_CAATTTCAGTCGCCCA-1	0.7284	PT S3 med.
3_CACGTTCCAAAGCGTG-1	0.773759	PT S3 med.
3_CAGGTATGTGTTGATC-1	0.756307	PT S3 med.
3_CATCCGTGTCATCAGT-1	0.723815	PT S3 med.
3_CATGAGTTCGAAACAA-1	0.713191	PT S3 med.
3_CATGGATGTGATTCTG-1	0.707444	PT S3 med.
3_CATTCTACAGTCCGTG-1	0.685618	PT S3 med.
3_CATTCTATCTAGCCAA-1	0.751674	PT S3 med.
3_CATTGCCGTTTCCATT-1	0.78905	PT S3 med.
3_CCACCATCAGCGACAA-1	0.732526	PT S3 med.
3_CCCTCAAAGGGAACAA-1	0.7278	PT S3 med.
3_CCTCAACTCGTTCATT-1	0.682772	PT S3 med.
3_CCTGCATCATTCTCCG-1	0.741285	PT S3 med.
3_CCTTGTGAGGGAACAA-1	0.825832	PT S3 med.
3_CGATGCGCAGTCGGTC-1	0.706554	PT S3 med.
3_CGGAGAAGTAATTAGG-1	0.760275	PT S3 med.
3_CGGCAGTCAGAGACTG-1	0.755282	PT S3 med.
3_CGGGCATTCTGATGGT-1	0.724624	PT S3 med.
3_CGGTCAGAGATTGATG-1	0.739895	PT S3 med.
3_CGGTCAGTCCATCTGC-1	0.758926	PT S3 med.
3_CGTAAGTGTAAGTTAG-1	0.748698	PT S3 med.
3_CGTAAGTGTTGCGTAT-1	0.752438	PT S3 med.
3_CTAACTTGTATGGGAC-1	0.739454	PT S3 med.
3_CTACATTAGTCACTAC-1	0.73711	PT S3 med.
3_CTCCGATAGTTCACTG-1	0.721828	PT S3 med.
3_CTGAGGCTCTGCGTCT-1	0.753133	PT S3 med.
3_CTGCCTACAATCAAGA-1	0.790055	PT S3 med.
3_CTGTACCGTACTTGTG-1	0.752537	PT S3 med.
3_CTTCCTTGTTTATGCG-1	0.748447	PT S3 med.
3_CTTCGGTTCTGGTTGA-1	0.747564	PT S3 med.
3_CTTCTCTGTCCAGTTA-1	0.730761	PT S3 med.
3_CTTGAGAAGGAATCGC-1	0.739787	PT S3 med.
3_GAAACCTTCGTTTACT-1	0.731227	PT S3 med.
3_GAAGTAAAGTCTAGCT-1	0.743163	PT S3 med.
3_GACACGCCATTATGCG-1	0.737821	PT S3 med.
3_GAGAAATCAATTAGGA-1	0.774693	PT S3 med.
3_GAGAGGTTCAACTGGT-1	0.726738	PT S3 med.
3_GAGTCATAGACCATTC-1	0.784034	PT S3 med.
3_GAGTTACGTCCCAAAT-1	0.749177	PT S3 med.
3_GAGTTACGTTCTTAGG-1	0.721001	PT S3 med.
3_GATAGAACAGAACGCA-1	0.734135	PT S3 med.
3_GATAGCTGTGTCATTG-1	0.759012	PT S3 med.
3_GATCACACAACACGTT-1	0.736444	PT S3 med.
3_GATCAGTGTCTCGACG-1	0.791856	PT S3 med.
3_GATCATGGTGAATAAC-1	0.725557	PT S3 med.
3_GATGACTCAATCTAGC-1	0.754252	PT S3 med.
3_GATGACTTCTCGTTTA-1	0.732052	PT S3 med.
3_GCACGGTTCAAGAATG-1	0.679647	PT S3 med.
3_GCACGTGAGCGACTAG-1	0.696961	PT S3 med.
3_GCACTAAAGATTCGAA-1	0.761588	PT S3 med.
3_GCATCGGCATCAGTGT-1	0.69977	PT S3 med.
3_GCCAACGCACGTCATA-1	0.736318	PT S3 med.
3_GCCAGGTGTTAGGAGC-1	0.769954	PT S3 med.
3_GCCATTCAGGAGCAAA-1	0.723194	PT S3 med.
3_GCGGAAACACTAAACC-1	0.774074	PT S3 med.
3_GCGGAAATCGTGGAAG-1	0.725933	PT S3 med.
3_GCTGGGTAGAGTCAAT-1	0.790089	PT S3 med.
3_GGAACCCAGGTGCATG-1	0.751881	PT S3 med.
3_GGATGTTCAGGCGATA-1	0.727314	PT S3 med.
3_GGGACCTCAGGTGGAT-1	0.754938	PT S3 med.
3_GGGACCTCATCGTCCT-1	0.746004	PT S3 med.
3_GGGACCTGTCGTTGGC-1	0.747164	PT S3 med.
3_GGGATCCAGTGAATAC-1	0.731062	PT S3 med.
3_GGGCCATGTTGTCTAG-1	0.802597	PT S3 med.
3_GGGCTCAAGGTGAGCT-1	0.754084	PT S3 med.
3_GGGCTCATCAACGCTA-1	0.718401	PT S3 med.
3_GGGTGAAGTCCTGTTC-1	0.729201	PT S3 med.
3_GGGTGTCGTAGAGATT-1	0.746399	PT S3 med.
3_GGGTTATTCGTGGCTG-1	0.780093	PT S3 med.
3_GGGTTTAGTTGGACCC-1	0.701498	PT S3 med.
3_GTAGAAAAGGCCTGAA-1	0.747316	PT S3 med.
3_GTCACGGCAAGGGTCA-1	0.701017	PT S3 med.
3_GTCATTTCAACCGTAT-1	0.753	PT S3 med.
3_GTCCACTGTTATCTGG-1	0.715224	PT S3 med.
3_GTGGCGTCAGCAGATG-1	0.789689	PT S3 med.
3_GTGTTCCGTGCCTACG-1	0.740192	PT S3 med.
3_GTTCATTTCGGACTTA-1	0.714892	PT S3 med.
3_TAACTTCAGTCTCCTC-1	0.813248	PT S3 med.
3_TAAGCACGTCACCTTC-1	0.737603	PT S3 med.
3_TAAGCGTAGCCTCGTG-1	0.725093	PT S3 med.
3_TAAGTCGAGGGAGAAT-1	0.715447	PT S3 med.
3_TACACCCAGACATCAA-1	0.740451	PT S3 med.
3_TACATTCAGATCCAAA-1	0.722834	PT S3 med.
3_TACTTCACAGCATACT-1	0.744315	PT S3 med.
3_TACTTGTGTCACTCGG-1	0.723994	PT S3 med.
3_TAGAGTCCAGCGTACC-1	0.729785	PT S3 med.
3_TAGAGTCTCTCTGAGA-1	0.733768	PT S3 med.
3_TAGGGTTAGTTGCTGT-1	0.733563	PT S3 med.
3_TATACCTCACAAAGCG-1	0.756782	PT S3 med.
3_TATCCTAGTCCGGCAT-1	0.728992	PT S3 med.
3_TATCGCCGTGAAGCGT-1	0.660841	PT S3 med.
3_TATCTGTTCCGACGGT-1	0.726252	PT S3 med.
3_TATCTTGTCACCTTGC-1	0.718278	PT S3 med.
3_TCAGCCTTCCCGGTAG-1	0.72617	PT S3 med.
3_TCATGCCAGGTTTGAA-1	0.761207	PT S3 med.
3_TCATGGAGTCGTGCCA-1	0.711763	PT S3 med.
3_TCATTACCAGTAGAGC-1	0.743339	PT S3 med.
3_TCATTTGCAGCTACCG-1	0.774767	PT S3 med.
3_TCATTTGGTTTGAACC-1	0.751952	PT S3 med.
3_TCCGATCCAGAAGTTA-1	0.72566	PT S3 med.
3_TCCTTCTTCGCATTGA-1	0.723596	PT S3 med.
3_TCGAAGTTCCGGTAAT-1	0.778085	PT S3 med.
3_TCGCAGGGTCACATTG-1	0.736101	PT S3 med.
3_TCGGTCTAGCCATTGT-1	0.731901	PT S3 med.
3_TCGGTCTGTCCATAGT-1	0.722951	PT S3 med.
3_TCTACATGTAACAAGT-1	0.745819	PT S3 med.
3_TGACCCTGTATAGCTC-1	0.780903	PT S3 med.
3_TGACCCTTCCATAGAC-1	0.80913	PT S3 med.
3_TGAGCATTCGCCTTTG-1	0.707853	PT S3 med.
3_TGAGGAGAGGTCGAGT-1	0.737405	PT S3 med.
3_TGATCAGCATCATCTT-1	0.733737	PT S3 med.
3_TGATGGTCAGCAGTAG-1	0.763803	PT S3 med.
3_TGATTCTTCGCACTCT-1	0.745405	PT S3 med.
3_TGCATCCTCGTTTACT-1	0.750811	PT S3 med.
3_TGCATGAGTATGCTAC-1	0.743168	PT S3 med.
3_TGCGATAGTAGATGTA-1	0.838253	PT S3 med.
3_TGGATCAGTAGAGCTG-1	0.735277	PT S3 med.
3_TGGATGTCACAAGCTT-1	0.757458	PT S3 med.
3_TGGGAGATCTGAGGCC-1	0.737089	PT S3 med.
3_TGTCAGAAGCCTCATA-1	0.75133	PT S3 med.
3_TGTGTGAGTTAGGAGC-1	0.693161	PT S3 med.
3_TTACCATGTTAGCGGA-1	0.758298	PT S3 med.
3_TTACTGTAGGTCCCTG-1	0.75755	PT S3 med.
3_TTAGGCATCGAGGCAA-1	0.7221	PT S3 med.
3_TTGAGTGCACACGGTC-1	0.688558	PT S3 med.
3_TTGCATTAGCTCCCTT-1	0.772072	PT S3 med.
3_TTGCATTCAACATACC-1	0.732046	PT S3 med.
4_AAACCCAAGGAACGCT-1	0.633495	PT S3 med.
4_AAACCCAGTTACGGAG-1	0.666772	PT S3 med.
4_AAAGGTACACGTGAGA-1	0.615068	PT S3 med.
4_AACCTGAGTACGGATG-1	0.619174	PT S3 med.
4_AACCTTTAGGACAAGA-1	0.636944	PT S3 med.
4_AACGTCATCATCGCTC-1	0.569525	PT S3 med.
4_AAGAACACAGTGCCTG-1	0.653486	PT S3 med.
4_AAGACTCCACCGTGCA-1	0.618992	PT S3 med.
4_AAGATAGCAGCAGTAG-1	0.628435	PT S3 med.
4_AAGCCATAGGACAGCT-1	0.625682	PT S3 med.
4_AAGCGTTAGCTGGCCT-1	0.609233	PT S3 med.
4_AAGGAATGTGTCCGGT-1	0.628259	PT S3 med.
4_AAGTTCGAGGCTGTAG-1	0.584129	PT S3 med.
4_AAGTTCGGTTGCACGC-1	0.633101	PT S3 med.
4_AATCGACAGGTGAGCT-1	0.541021	PT S3 med.
4_AATCGACGTGCCGGTT-1	0.625746	PT S3 med.
4_AATCGTGTCAACTGAC-1	0.637522	PT S3 med.
4_AATGGCTTCGAGAACG-1	0.608777	PT S3 med.
4_ACACAGTAGTTGTCGT-1	0.626162	PT S3 med.
4_ACATCCCAGCGTTACT-1	0.625168	PT S3 med.
4_ACATTTCCAAGAGGCT-1	0.638535	PT S3 med.
4_ACCAAACCACCCTGTT-1	0.66424	PT S3 med.
4_ACCAACACAGGTTACT-1	0.628948	PT S3 med.
4_ACCCAAAAGGAAAGGT-1	0.463543	PT S3 med.
4_ACCTGTCGTGTTCAGT-1	0.650305	PT S3 med.
4_ACGGAAGAGCTGTTCA-1	0.656407	PT S3 med.
4_ACGGGTCTCCTACACC-1	0.62239	PT S3 med.
4_ACGTCCTAGTCTCTGA-1	0.622967	PT S3 med.
4_ACGTCCTTCCTTGAAG-1	0.633737	PT S3 med.
4_ACTGTCCCATCAGCGC-1	0.625146	PT S3 med.
4_ACTTAGGTCCCATTCG-1	0.637654	PT S3 med.
4_ACTTATCGTATCAGGG-1	0.59148	PT S3 med.
4_ACTTCGCCAGTTGGTT-1	0.638946	PT S3 med.
4_AGAACCTCAGGAATCG-1	0.607126	PT S3 med.
4_AGAACCTGTGGCATCC-1	0.633822	PT S3 med.
4_AGACCATCAACGCCCA-1	0.631887	PT S3 med.
4_AGACCATGTACTGCGC-1	0.651825	PT S3 med.
4_AGACCCGTCATGCCAA-1	0.650268	PT S3 med.
4_AGATGCTTCACCCTCA-1	0.553819	PT S3 med.
4_AGCGCCAAGGCCCGTT-1	0.627108	PT S3 med.
4_AGGAATATCGAGTACT-1	0.639867	PT S3 med.
4_AGGATAAAGCAACAAT-1	0.584167	PT S3 med.
4_AGGATAAGTATCAGCT-1	0.644313	PT S3 med.
4_AGGATCTTCGCCGAGT-1	0.628246	PT S3 med.
4_AGGCTGCTCTAGAGCT-1	0.637643	PT S3 med.
4_AGGGCCTCAAACTCGT-1	0.622113	PT S3 med.
4_AGGTCATGTAATACCC-1	0.740428	PT S3 med.
4_AGGTCATGTTTACTGG-1	0.65821	PT S3 med.
4_AGTACCAAGTTTAGGA-1	0.615309	PT S3 med.
4_AGTACTGTCCATACAG-1	0.0861775	PT S3 med.
4_AGTAGCTTCCCATAGA-1	0.579731	PT S3 med.
4_AGTCACAAGATACATG-1	0.634818	PT S3 med.
4_AGTCACATCACTTCTA-1	0.515525	PT S3 med.
4_AGTTAGCAGTTTCGGT-1	0.597461	PT S3 med.
4_AGTTAGCGTCGGAACA-1	0.468648	PT S3 med.
4_AGTTCCCGTGTCATCA-1	0.620019	PT S3 med.
4_ATACTTCCAAGGTACG-1	0.6286	PT S3 med.
4_ATAGACCTCCCATAGA-1	0.631469	PT S3 med.
4_ATCACGACACAACGCC-1	0.638406	PT S3 med.
4_ATCACGAGTACAGGTG-1	0.66014	PT S3 med.
4_ATCACTTCACTTTATC-1	0.628905	PT S3 med.
4_ATCATTCCAAGAGCTG-1	0.589419	PT S3 med.
4_ATCCACCAGTAACCTC-1	0.636237	PT S3 med.
4_ATCCATTAGTCGAAAT-1	0.652272	PT S3 med.
4_ATCCGTCGTACAATAG-1	0.633037	PT S3 med.
4_ATCCTATTCCTCACGT-1	0.610825	PT S3 med.
4_ATCGATGTCGAACGGA-1	0.462539	PT S3 med.
4_ATGGTTGCACAAAGTA-1	0.668462	PT S3 med.
4_ATGGTTGTCTTCGTGC-1	0.615697	PT S3 med.
4_ATTCAGGCAGGATTCT-1	0.629233	PT S3 med.
4_ATTCCTACATCATGAC-1	0.642574	PT S3 med.
4_ATTCTACTCCCATGGG-1	0.574379	PT S3 med.
4_ATTCTTGCAGGGTTGA-1	0.625983	PT S3 med.
4_ATTTACCTCCCTGGTT-1	0.308155	PT S3 med.
4_CAAAGAACAGACAAAT-1	0.632471	PT S3 med.
4_CAACAGTCAACCGACC-1	0.627649	PT S3 med.
4_CAACAGTGTTGCATAC-1	0.640427	PT S3 med.
4_CAAGAGGGTTCACGAT-1	0.630115	PT S3 med.
4_CAAGAGGTCTATACGG-1	0.623453	PT S3 med.
4_CAAGCTACAGTGTACT-1	0.649837	PT S3 med.
4_CAAGCTATCGCTCTCA-1	0.646906	PT S3 med.
4_CAATACGAGGAAGTCC-1	0.646437	PT S3 med.
4_CAATACGCACCGTGAC-1	0.641888	PT S3 med.
4_CACAACACAAACACCT-1	0.645128	PT S3 med.
4_CACAGATTCCTGGGTG-1	0.599669	PT S3 med.
4_CACATGACAGCGAGTA-1	0.629024	PT S3 med.
4_CAGATACGTCCGCAGT-1	0.659491	PT S3 med.
4_CAGATCATCGATAACC-1	0.637361	PT S3 med.
4_CAGCAATTCGGCACTG-1	0.65312	PT S3 med.
4_CAGCGTGGTATGTCTG-1	0.591018	PT S3 med.
4_CAGGCCAAGATCGCTT-1	0.647058	PT S3 med.
4_CATACCCTCTGTGTGA-1	0.649915	PT S3 med.
4_CATCGGGCATCGGCCA-1	0.587112	PT S3 med.
4_CATCGGGTCTGGCCTT-1	0.637537	PT S3 med.
4_CATGCAAAGGAGCAAA-1	0.61821	PT S3 med.
4_CATGCCTTCTGCGTCT-1	0.6434	PT S3 med.
4_CATTCATAGCTCATAC-1	0.496809	PT S3 med.
4_CATTGAGAGTTCATCG-1	0.652105	PT S3 med.
4_CATTGTTGTCATATGC-1	0.642519	PT S3 med.
4_CCAAGCGGTAGACGGT-1	0.625926	PT S3 med.
4_CCACAAAGTCAAAGTA-1	0.624889	PT S3 med.
4_CCACAAAGTCCCTAAA-1	0.535134	PT S3 med.
4_CCCAACTCAACCAATC-1	0.569911	PT S3 med.
4_CCCATTGGTGATTCAC-1	0.315068	PT S3 med.
4_CCCATTGGTTCGGCCA-1	0.646163	PT S3 med.
4_CCCTCTCCAGGTATGG-1	0.635905	PT S3 med.
4_CCCTCTCGTTTCCAAG-1	0.573557	PT S3 med.
4_CCGGTGACAGCTGAGA-1	0.636936	PT S3 med.
4_CCGGTGACAGTAGATA-1	0.610734	PT S3 med.
4_CCTATCGCATAGGAGC-1	0.602571	PT S3 med.
4_CCTCAACGTAACCCGC-1	0.646223	PT S3 med.
4_CCTCAACTCTGAGGCC-1	0.621713	PT S3 med.
4_CCTCTAGGTGACTAAA-1	0.630163	PT S3 med.
4_CCTTTGGGTCGCACAC-1	0.563859	PT S3 med.
4_CGAATTGTCTTACCAT-1	0.632522	PT S3 med.
4_CGAGGAAAGATTAGCA-1	0.655816	PT S3 med.
4_CGAGGAACAAATGCTC-1	0.620163	PT S3 med.
4_CGAGGAATCGGCATTA-1	0.735961	PT S3 med.
4_CGATGCGGTATCGCTA-1	0.611404	PT S3 med.
4_CGCAGGTTCACCATCC-1	0.634902	PT S3 med.
4_CGGAACCGTCGTCGGT-1	0.628222	PT S3 med.
4_CGGAACCTCCTTATGT-1	0.634328	PT S3 med.
4_CGGACACTCAGCGGAA-1	0.629009	PT S3 med.
4_CGGGCATAGCATGCGA-1	0.609336	PT S3 med.
4_CGTAAGTCAAGGACAC-1	0.613327	PT S3 med.
4_CGTGATATCGCTGTCT-1	0.623079	PT S3 med.
4_CGTGTCTCAACCCGCA-1	0.640289	PT S3 med.
4_CTACCCATCCACATAG-1	0.623814	PT S3 med.
4_CTCAAGACACAGCCAC-1	0.640848	PT S3 med.
4_CTCAATTAGATGTTAG-1	0.644304	PT S3 med.
4_CTCAATTCACATCCCT-1	0.623265	PT S3 med.
4_CTCACTGAGCTGACAG-1	0.717761	PT S3 med.
4_CTCATGCCACTTTATC-1	0.722093	PT S3 med.
4_CTCCACAGTTACGCCG-1	0.634784	PT S3 med.
4_CTCCCAAGTCATCACA-1	0.649073	PT S3 med.
4_CTCCGATGTATGGTTC-1	0.634901	PT S3 med.
4_CTCGAGGCAGACCAAG-1	0.596787	PT S3 med.
4_CTCTCAGTCGCTAAAC-1	0.608306	PT S3 med.
4_CTGAGCGCAAGTCCAT-1	0.578206	PT S3 med.
4_CTGAGGCTCCCATAGA-1	0.632308	PT S3 med.
4_CTGCAGGTCCGATGTA-1	0.615018	PT S3 med.
4_CTGCGAGTCCGACATA-1	0.633761	PT S3 med.
4_CTGGTCTAGTCTAACC-1	0.707719	PT S3 med.
4_CTTAGGAAGCTAGATA-1	0.526829	PT S3 med.
4_CTTCTCTCACTACCGG-1	0.617668	PT S3 med.
4_CTTGATTCACAATGTC-1	0.629267	PT S3 med.
4_CTTTCGGTCGTCGATA-1	0.636236	PT S3 med.
4_GAAGAATGTCGTATTG-1	0.617527	PT S3 med.
4_GAAGGGTTCCATCACC-1	0.518678	PT S3 med.
4_GAAGTAACACCCTCTA-1	0.63884	PT S3 med.
4_GAATCGTCACAGAAGC-1	0.644917	PT S3 med.
4_GACACGCTCCGAGCTG-1	0.587803	PT S3 med.
4_GACCCTTCAAGACCGA-1	0.645706	PT S3 med.
4_GACCTTCTCCTCTGCA-1	0.706563	PT S3 med.
4_GACCTTCTCTCACGAA-1	0.648434	PT S3 med.
4_GACGCTGTCCAATGCA-1	0.646875	PT S3 med.
4_GACTATGCACACAGAG-1	0.606498	PT S3 med.
4_GACTCTCTCTTGGCTC-1	0.653407	PT S3 med.
4_GAGACCCAGAAACTAC-1	0.634844	PT S3 med.
4_GAGACCCTCTACCCAC-1	0.610916	PT S3 med.
4_GAGACTTTCTTCGATT-1	0.62743	PT S3 med.
4_GAGAGGTTCGCAAGAG-1	0.626128	PT S3 med.
4_GAGGCCTCAAAGGAGA-1	0.621297	PT S3 med.
4_GAGGGATTCAGTGTCA-1	0.634797	PT S3 med.
4_GAGTCTACAAGCGATG-1	0.633994	PT S3 med.
4_GAGTTGTAGCTTGTGT-1	0.597679	PT S3 med.
4_GAGTTGTGTTTGTTCT-1	0.613691	PT S3 med.
4_GAGTTTGGTATCTCTT-1	0.639282	PT S3 med.
4_GATCGTACATGTGCTA-1	0.658937	PT S3 med.
4_GATGATCGTCGGTGAA-1	0.618778	PT S3 med.
4_GATTCTTCATGTGGCC-1	0.591975	PT S3 med.
4_GATTGGTCACTCTCGT-1	0.639215	PT S3 med.
4_GCAACATAGGAAGTAG-1	0.579744	PT S3 med.
4_GCACGGTTCTTTGCGC-1	0.580226	PT S3 med.
4_GCACGTGAGGGCTGAT-1	0.690147	PT S3 med.
4_GCAGCCAAGAAATCCA-1	0.626698	PT S3 med.
4_GCATCTCAGGTTCCAT-1	0.621841	PT S3 med.
4_GCATGATGTGTGAGCA-1	0.643472	PT S3 med.
4_GCATGATTCGGAAGGT-1	0.548218	PT S3 med.
4_GCATTAGAGTGGACTG-1	0.620818	PT S3 med.
4_GCCCAGAGTATGACAA-1	0.636289	PT S3 med.
4_GCCGTGAAGCGATCGA-1	0.624018	PT S3 med.
4_GCGTGCAGTTTGGCTA-1	0.646624	PT S3 med.
4_GCGTTTCGTGCCGGTT-1	0.639064	PT S3 med.
4_GCTGAATTCACCGCTT-1	0.640671	PT S3 med.
4_GCTTTCGTCTAGTCAG-1	0.502185	PT S3 med.
4_GGAACCCAGCAGTAAT-1	0.683162	PT S3 med.
4_GGAATGGGTACCGTGC-1	0.633805	PT S3 med.
4_GGAATGGTCGTAGGGA-1	0.634135	PT S3 med.
4_GGCACGTAGCTCCATA-1	0.680154	PT S3 med.
4_GGCGTCAGTACTGACT-1	0.587932	PT S3 med.
4_GGCTTGGGTATCGAGG-1	0.631057	PT S3 med.
4_GGGACAAGTATTAAGG-1	0.624103	PT S3 med.
4_GGGACAAGTCGTATTG-1	0.62179	PT S3 med.
4_GGGACCTCATATGAAG-1	0.618122	PT S3 med.
4_GGGCCATGTTCCATTT-1	0.621259	PT S3 med.
4_GGGCTCAGTGTTTACG-1	0.628912	PT S3 med.
4_GGGTGAATCAAATGCC-1	0.644009	PT S3 med.
4_GGTGGCTTCGAGAAAT-1	0.635652	PT S3 med.
4_GGTTAACAGAGTCTTC-1	0.612437	PT S3 med.
4_GGTTAACTCTTTGCTA-1	0.625049	PT S3 med.
4_GTAACCATCGCCAACG-1	0.584282	PT S3 med.
4_GTATTTCAGTGGTGGT-1	0.629435	PT S3 med.
4_GTCAAACTCCCTGTTG-1	0.639631	PT S3 med.
4_GTCAAGTGTAACGTTC-1	0.596702	PT S3 med.
4_GTCATGATCATCTACT-1	0.656666	PT S3 med.
4_GTCATTTTCATTTGCT-1	0.606787	PT S3 med.
4_GTCATTTTCTGGCCTT-1	0.644528	PT S3 med.
4_GTCTACCGTGAGATTA-1	0.552974	PT S3 med.
4_GTCTGTCAGCACCGTC-1	0.628231	PT S3 med.
4_GTGATGTCACTGCACG-1	0.561573	PT S3 med.
4_GTGCGTGCACAACCGC-1	0.615331	PT S3 med.
4_GTGGAAGTCAAACGAA-1	0.604986	PT S3 med.
4_GTGGGAAAGCGTGTCC-1	0.600627	PT S3 med.
4_GTGGGAATCTCTGGTC-1	0.649682	PT S3 med.
4_GTGTAACAGCAGTAAT-1	0.661572	PT S3 med.
4_GTGTGATAGAAGGGAT-1	0.628357	PT S3 med.
4_GTGTTCCCACAGCGCT-1	0.717684	PT S3 med.
4_GTTAGTGTCATGGAGG-1	0.766467	PT S3 med.
4_GTTCATTTCTCTTGCG-1	0.591053	PT S3 med.
4_GTTGAACTCATGAGTC-1	0.688349	PT S3 med.
4_GTTGCTCGTACGATCT-1	0.42826	PT S3 med.
4_GTTTGGATCTCGACCT-1	0.637943	PT S3 med.
4_TAACTTCAGGACGCAT-1	0.633581	PT S3 med.
4_TAACTTCCAGCACAAG-1	0.654034	PT S3 med.
4_TAATCTCAGCTGCCAC-1	0.625152	PT S3 med.
4_TACAGGTGTTCTCTAT-1	0.612334	PT S3 med.
4_TACCGGGAGCTCTGTA-1	0.634	PT S3 med.
4_TACCTCGGTGGATACG-1	0.618978	PT S3 med.
4_TACGGTAGTGCGGTAA-1	0.536952	PT S3 med.
4_TACGTCCGTTGTCAGT-1	0.633537	PT S3 med.
4_TACTTGTAGATTCGAA-1	0.626774	PT S3 med.
4_TACTTGTCAAGGTTGG-1	0.571314	PT S3 med.
4_TAGACTGGTGGCTACC-1	0.619517	PT S3 med.
4_TAGAGTCAGTGGCGAT-1	0.591579	PT S3 med.
4_TAGATCGCACAAACGG-1	0.319116	PT S3 med.
4_TAGATCGGTACCGGAA-1	0.612248	PT S3 med.
4_TAGGAGGAGCGAATGC-1	0.645647	PT S3 med.
4_TAGGAGGGTGTCTAAC-1	0.620403	PT S3 med.
4_TAGGAGGTCCTCTTTC-1	0.605625	PT S3 med.
4_TAGGGTTGTCCGAAAG-1	0.642327	PT S3 med.
4_TATACCTAGAATCGAT-1	0.628888	PT S3 med.
4_TATACCTTCCCGAGAC-1	0.635386	PT S3 med.
4_TATCCTAGTTGATCGT-1	0.604602	PT S3 med.
4_TATCTTGCATTGACAC-1	0.635757	PT S3 med.
4_TCAAGCACACACGTGC-1	0.630401	PT S3 med.
4_TCACAAGTCCATTTAC-1	0.638034	PT S3 med.
4_TCACATTTCATTGCCC-1	0.62332	PT S3 med.
4_TCACGCTTCCACACCT-1	0.618892	PT S3 med.
4_TCACGGGAGGTAAAGG-1	0.583348	PT S3 med.
4_TCACGGGTCCGACAGC-1	0.460654	PT S3 med.
4_TCAGGGCTCGGTCGAC-1	0.624741	PT S3 med.
4_TCATACTGTCTTCATT-1	0.622502	PT S3 med.
4_TCATACTTCCCAAGCG-1	0.571996	PT S3 med.
4_TCATCCGTCAGTCCGG-1	0.527018	PT S3 med.
4_TCATTGTGTGAGCTCC-1	0.626739	PT S3 med.
4_TCCACCAAGCTGTGCC-1	0.638906	PT S3 med.
4_TCCGAAATCTTACACT-1	0.627708	PT S3 med.
4_TCCGGGACAGGTTACT-1	0.63919	PT S3 med.
4_TCCTAATAGTGTTCCA-1	0.656967	PT S3 med.
4_TCGCAGGTCTCTGCTG-1	0.646799	PT S3 med.
4_TCTCCGAGTATCGTGT-1	0.627728	PT S3 med.
4_TCTGGCTGTAACCAGG-1	0.639294	PT S3 med.
4_TCTGGCTGTTAGAGTA-1	0.628362	PT S3 med.
4_TCTTAGTAGGGACAGG-1	0.635346	PT S3 med.
4_TCTTAGTGTTACTCAG-1	0.561991	PT S3 med.
4_TCTTGCGCATACCATG-1	0.588521	PT S3 med.
4_TGAACGTGTTACGTAC-1	0.650248	PT S3 med.
4_TGACAGTAGCACAAAT-1	0.566805	PT S3 med.
4_TGACCCTAGCCGATTT-1	0.638982	PT S3 med.
4_TGAGACTAGGCATCTT-1	0.613642	PT S3 med.
4_TGAGCATAGGTGCCTC-1	0.634069	PT S3 med.
4_TGATTCTGTGAAGCGT-1	0.639928	PT S3 med.
4_TGATTTCGTCTTCCGT-1	0.643181	PT S3 med.
4_TGCACGGCACCTCTGT-1	0.646339	PT S3 med.
4_TGCAGTAGTCCGGATC-1	0.639169	PT S3 med.
4_TGCATCCTCAAGAATG-1	0.642484	PT S3 med.
4_TGCGACGGTGTCTTGA-1	0.598541	PT S3 med.
4_TGCGGCAAGTATAACG-1	0.649014	PT S3 med.
4_TGCTGAATCGCCGATG-1	0.617048	PT S3 med.
4_TGCTTGCCAGGTGACA-1	0.547594	PT S3 med.
4_TGCTTGCGTTCCTAAG-1	0.668896	PT S3 med.
4_TGGTAGTTCATGTCAG-1	0.577492	PT S3 med.
4_TGGTTAGGTTTGTTGG-1	0.638777	PT S3 med.
4_TGTAAGCCAGACACCC-1	0.64547	PT S3 med.
4_TGTCAGACAGCCTTCT-1	0.658363	PT S3 med.
4_TGTCAGAGTATGATCC-1	0.63398	PT S3 med.
4_TGTGAGTGTGTTTCTT-1	0.604733	PT S3 med.
4_TGTTGGAGTCGTGGAA-1	0.586951	PT S3 med.
4_TTAATCCGTTGTCAGT-1	0.639504	PT S3 med.
4_TTACGTTAGAAGCGCT-1	0.643485	PT S3 med.
4_TTACGTTCACTCCGAG-1	0.631169	PT S3 med.
4_TTACTGTCATCTGCGG-1	0.646327	PT S3 med.
4_TTAGTCTCACCGTACG-1	0.611727	PT S3 med.
4_TTAGTCTGTATTTCGG-1	0.7093	PT S3 med.
4_TTCACCGGTAACTGCT-1	0.668377	PT S3 med.
4_TTCACGCGTTCTCCCA-1	0.687948	PT S3 med.
4_TTCAGGAAGCCTTCTC-1	0.637624	PT S3 med.
4_TTCCACGGTCCGATCG-1	0.672694	PT S3 med.
4_TTCCGTGAGCAGGCTA-1	0.639761	PT S3 med.
4_TTCCTCTCAAGATCCT-1	0.614819	PT S3 med.
4_TTCCTCTGTCCCACGA-1	0.63304	PT S3 med.
4_TTCTCTCCATGACTTG-1	0.623837	PT S3 med.
4_TTCTTCCGTGATGGCA-1	0.632571	PT S3 med.
4_TTGAACGGTGTTTCTT-1	0.574892	PT S3 med.
4_TTGCATTCAAGTGGTG-1	0.569328	PT S3 med.
4_TTGCATTTCGTTCCCA-1	0.633293	PT S3 med.
4_TTGCGTCCACTACTTT-1	0.651175	PT S3 med.
4_TTGGGTAAGTTGCGAG-1	0.646809	PT S3 med.
4_TTGGTTTAGGTCATAA-1	0.631488	PT S3 med.
4_TTGTGGAAGTATGTAG-1	0.64985	PT S3 med.
4_TTTACGTAGCTATCTG-1	0.635142	PT S3 med.
4_TTTAGTCGTCGATTTG-1	0.583222	PT S3 med.
4_TTTCACAAGTGCTACT-1	0.636371	PT S3 med.
4_TTTCATGCAAAGGTTA-1	0.632393	PT S3 med.
4_TTTGGAGAGCAACTTC-1	0.645962	PT S3 med.
4_TTTGGAGTCGCAACAT-1	0.654413	PT S3 med.
5_AAATGGAAGGTAATCA-1	0.908349	PT S3 med.
5_AAATGGATCACACCGG-1	0.902083	PT S3 med.
5_AACCACAGTTGTCCCT-1	0.864939	PT S3 med.
5_AACGGGATCCTACAAG-1	0.902808	PT S3 med.
5_AACGTCATCAGCTGAT-1	0.884818	PT S3 med.
5_AAGACTCTCAAGCCTA-1	0.922501	PT S3 med.
5_AAGGAATAGCTTGTTG-1	0.899562	PT S3 med.
5_AAGGAATGTCGTGATT-1	0.912161	PT S3 med.
5_ACAAAGAAGGCGAACT-1	0.889882	PT S3 med.
5_ACAAGCTGTACCGGCT-1	0.930671	PT S3 med.
5_ACACAGTAGAATAACC-1	0.903899	PT S3 med.
5_ACATCCCTCGACGCTG-1	0.912751	PT S3 med.
5_ACCAAACCAGGCGAAT-1	0.88986	PT S3 med.
5_ACCAACATCTTGCGCT-1	0.872112	PT S3 med.
5_ACCACAATCACTACGA-1	0.899032	PT S3 med.
5_ACCATTTAGTCTAGCT-1	0.842236	PT S3 med.
5_ACCATTTCATGCAGGA-1	0.92031	PT S3 med.
5_ACCATTTTCGACGACC-1	0.871299	PT S3 med.
5_ACCCTTGTCGGCAGTC-1	0.901692	PT S3 med.
5_ACGATCACACGAGAAC-1	0.909019	PT S3 med.
5_ACGGTTAGTGTATCCA-1	0.921641	PT S3 med.
5_ACGTAACTCGCTCATC-1	0.862447	PT S3 med.
5_ACGTACACAGTAGTTC-1	0.930436	PT S3 med.
5_ACTGATGTCACTTTGT-1	0.914529	PT S3 med.
5_ACTGCAACAAACTCTG-1	0.914321	PT S3 med.
5_AGAAGTACACCACTGG-1	0.882514	PT S3 med.
5_AGACAAATCCATTGGA-1	0.931318	PT S3 med.
5_AGACTCATCTCTGCCA-1	0.899525	PT S3 med.
5_AGAGCAGCATTGCTTT-1	0.882497	PT S3 med.
5_AGCATCAGTTAACCTG-1	0.876438	PT S3 med.
5_AGCCAATGTAGACGGT-1	0.876729	PT S3 med.
5_AGGAGGTCACCCGTAG-1	0.928716	PT S3 med.
5_AGGTGTTCAGAACGCA-1	0.910109	PT S3 med.
5_AGTAACCCAAGCGATG-1	0.894887	PT S3 med.
5_AGTACTGCACGACGCT-1	0.892639	PT S3 med.
5_AGTTCGAAGACTGGGT-1	0.898862	PT S3 med.
5_ATACTTCAGACCATGG-1	0.905839	PT S3 med.
5_ATACTTCGTAACAAGT-1	0.928443	PT S3 med.
5_ATATCCTCATGTTCGA-1	0.89933	PT S3 med.
5_ATCAGGTCAGGCCTGT-1	0.895099	PT S3 med.
5_ATCCATTAGTATAGAC-1	0.912575	PT S3 med.
5_ATCTTCACACGTCTCT-1	0.913814	PT S3 med.
5_ATGGGAGAGTAACCGG-1	0.903398	PT S3 med.
5_ATGGGAGGTAACAAGT-1	0.889835	PT S3 med.
5_ATGGGAGTCATCGACA-1	0.87847	PT S3 med.
5_ATTACCTGTCCGGCAT-1	0.892956	PT S3 med.
5_ATTCACTTCAACGCTA-1	0.932189	PT S3 med.
5_ATTCCATCACATGGTT-1	0.901212	PT S3 med.
5_ATTGTTCAGAAGCGCT-1	0.872795	PT S3 med.
5_CAACGATGTCGCTTAA-1	0.89451	PT S3 med.
5_CAACGATGTTAGAAGT-1	0.890381	PT S3 med.
5_CAATACGGTGATGTAA-1	0.928172	PT S3 med.
5_CAATCGACACCTAAAC-1	0.87825	PT S3 med.
5_CACAACAAGACCTGGA-1	0.903489	PT S3 med.
5_CACAGGCCACGTAGTT-1	0.900487	PT S3 med.
5_CACATGACAGACGCTC-1	0.918604	PT S3 med.
5_CACTGGGTCACGGGAA-1	0.893205	PT S3 med.
5_CACTTCGTCCCTTTGG-1	0.887091	PT S3 med.
5_CAGAGCCAGAGATTCA-1	0.942076	PT S3 med.
5_CAGATACAGATCGACG-1	0.913388	PT S3 med.
5_CAGCCAGAGATAGCTA-1	0.900826	PT S3 med.
5_CAGTTAGAGACGGAAA-1	0.880238	PT S3 med.
5_CATACAGGTAGACGTG-1	0.916533	PT S3 med.
5_CATACAGTCTGGCTGG-1	0.928945	PT S3 med.
5_CATTGCCGTCGTTCAA-1	0.924036	PT S3 med.
5_CATTTCAGTCTTTCTA-1	0.902894	PT S3 med.
5_CATTTCATCTATCGTT-1	0.946309	PT S3 med.
5_CCACTTGTCGAATGCT-1	0.909042	PT S3 med.
5_CCCAACTCAATTTCGG-1	0.920825	PT S3 med.
5_CCCTAACCAGCTGTAT-1	0.911672	PT S3 med.
5_CCGATGGCAGTCAGCC-1	0.881412	PT S3 med.
5_CCTATCGGTCTTCTAT-1	0.932195	PT S3 med.
5_CCTCACAAGCACACAG-1	0.913374	PT S3 med.
5_CCTCATGTCTTTCAGT-1	0.909491	PT S3 med.
5_CGAAGGAGTGTCCAAT-1	0.916163	PT S3 med.
5_CGAAGTTAGCTGCCAC-1	0.908461	PT S3 med.
5_CGACAGCTCCAGCCTT-1	0.881206	PT S3 med.
5_CGATCGGTCATTTGCT-1	0.88697	PT S3 med.
5_CGCATAACATTACGGT-1	0.917335	PT S3 med.
5_CGGAATTAGCCTAACT-1	0.905302	PT S3 med.
5_CGGAATTAGTATTGCC-1	0.904745	PT S3 med.
5_CGGGACTGTTTCACTT-1	0.897734	PT S3 med.
5_CGGTCAGTCAGCTTGA-1	0.903302	PT S3 med.
5_CGTTAGAAGTGGATAT-1	0.87349	PT S3 med.
5_CTACCCAGTCACGTGC-1	0.914753	PT S3 med.
5_CTACGGGAGCAGTCTT-1	0.930984	PT S3 med.
5_CTACTATTCCTTCAGC-1	0.900722	PT S3 med.
5_CTCAACCTCTGTCAGA-1	0.899043	PT S3 med.
5_CTCAGGGCAGTCGAGA-1	0.860791	PT S3 med.
5_CTCCTTTAGGTAGACC-1	0.895111	PT S3 med.
5_CTGAGGCAGCACGGAT-1	0.923184	PT S3 med.
5_CTGGCAGCATAACTCG-1	0.906511	PT S3 med.
5_CTTAGGACAAGCCCAC-1	0.921162	PT S3 med.
5_CTTCTCTCAAGCCTGC-1	0.904804	PT S3 med.
5_CTTGATTTCTCTATAC-1	0.913686	PT S3 med.
5_CTTTCAACATTAGGCT-1	0.90144	PT S3 med.
5_GAAGCCCAGCATTGTC-1	0.897619	PT S3 med.
5_GACCCTTCACGCAGTC-1	0.915933	PT S3 med.
5_GACCGTGTCCCTCATG-1	0.880862	PT S3 med.
5_GACGTTACAGTCGCTG-1	0.928366	PT S3 med.
5_GACGTTAGTAGCTGCC-1	0.899817	PT S3 med.
5_GACTCAATCAAGCCGC-1	0.937941	PT S3 med.
5_GAGACCCAGAACGCGT-1	0.911192	PT S3 med.
5_GAGCTGCCATGCTGCG-1	0.899687	PT S3 med.
5_GAGGCCTCAGACGGAT-1	0.902063	PT S3 med.
5_GATAGCTAGATTGATG-1	0.911807	PT S3 med.
5_GATCATGAGTTCTACG-1	0.905694	PT S3 med.
5_GATCCCTTCAAGGACG-1	0.834747	PT S3 med.
5_GATGAGGAGCCGTAAG-1	0.876023	PT S3 med.
5_GATGCTAAGATGCCGA-1	0.902338	PT S3 med.
5_GATGGAGTCAAATGCC-1	0.928727	PT S3 med.
5_GATTCTTAGTGCCAGA-1	0.926887	PT S3 med.
5_GATTTCTTCCAACTGA-1	0.892106	PT S3 med.
5_GCACGTGAGAGTTGAT-1	0.878658	PT S3 med.
5_GCCGTGAAGAGGTATT-1	0.919204	PT S3 med.
5_GCGTGCATCACCTGTC-1	0.880356	PT S3 med.
5_GCTACAAGTAGCGTCC-1	0.916202	PT S3 med.
5_GCTTTCGAGCCGCTTG-1	0.930065	PT S3 med.
5_GGAAGTGGTCTAGATC-1	0.882225	PT S3 med.
5_GGATCTACAGTCTGGC-1	0.893624	PT S3 med.
5_GGCGTCAGTGGCGTAA-1	0.893264	PT S3 med.
5_GGGTCACCAACGCCCA-1	0.913657	PT S3 med.
5_GGTCTGGGTGACACAG-1	0.915428	PT S3 med.
5_GGTGTCGAGAGATGCC-1	0.911596	PT S3 med.
5_GGTTCTCAGGAACTCG-1	0.944295	PT S3 med.
5_GGTTGTACACACAGCC-1	0.907883	PT S3 med.
5_GTAACCAAGGCATCAG-1	0.917831	PT S3 med.
5_GTAATCGTCTCAGTCC-1	0.929395	PT S3 med.
5_GTAGAAAGTCGCACGT-1	0.89453	PT S3 med.
5_GTAGCTAAGCCGAACA-1	0.900072	PT S3 med.
5_GTCACTCAGCTAGTTC-1	0.902954	PT S3 med.
5_GTCCCATTCCCAGTGG-1	0.913863	PT S3 med.
5_GTCTACCGTCAGGCAA-1	0.916538	PT S3 med.
5_GTCTGTCAGCTGACTT-1	0.90622	PT S3 med.
5_GTCTTTACACAACGTT-1	0.903024	PT S3 med.
5_GTGAGCCGTAAGGTCG-1	0.900507	PT S3 med.
5_GTGCACGAGCGGGTAT-1	0.921669	PT S3 med.
5_GTGGAAGGTGCATCTA-1	0.892875	PT S3 med.
5_GTGGCGTAGGCATCTT-1	0.876029	PT S3 med.
5_GTGGGAAGTTGATCGT-1	0.89547	PT S3 med.
5_GTGGTTACAGATACCT-1	0.903554	PT S3 med.
5_GTGTGGCAGGTCACCC-1	0.918313	PT S3 med.
5_GTGTTAGCAAGGGTCA-1	0.904204	PT S3 med.
5_GTTACCCAGTAGGATT-1	0.902751	PT S3 med.
5_GTTCTATTCTTCCCAG-1	0.923119	PT S3 med.
5_GTTGAACTCAGCCTTC-1	0.911513	PT S3 med.
5_TAACTTCTCTGAGTCA-1	0.894949	PT S3 med.
5_TAACTTCTCTTGAACG-1	0.860822	PT S3 med.
5_TAATTCCTCGCTGTCT-1	0.888544	PT S3 med.
5_TACGGTAGTATTTCGG-1	0.913148	PT S3 med.
5_TAGACCATCATTCATC-1	0.893166	PT S3 med.
5_TAGCACAAGGCATGCA-1	0.882021	PT S3 med.
5_TAGGAGGCATCGAACT-1	0.927046	PT S3 med.
5_TATCAGGAGGCCACCT-1	0.897535	PT S3 med.
5_TATCAGGTCGACGAGA-1	0.903754	PT S3 med.
5_TATCTGTCAACTACGT-1	0.918093	PT S3 med.
5_TATTCCAGTAGGTACG-1	0.894935	PT S3 med.
5_TCAATTCGTTGTCTAG-1	0.903606	PT S3 med.
5_TCACACCCAAGGGTCA-1	0.904389	PT S3 med.
5_TCACTCGGTTATAGAG-1	0.914756	PT S3 med.
5_TCAGGGCTCAGGACAG-1	0.907905	PT S3 med.
5_TCATGGAAGAGTCTGG-1	0.898896	PT S3 med.
5_TCATGGACAACTGTGT-1	0.909398	PT S3 med.
5_TCATGTTCATTGAAGA-1	0.928544	PT S3 med.
5_TCATTGTGTTCTCACC-1	0.898656	PT S3 med.
5_TCCATGCCATAGTCGT-1	0.886806	PT S3 med.
5_TCCCATGGTGAAGCGT-1	0.883508	PT S3 med.
5_TCGAAGTAGGTTCACT-1	0.892193	PT S3 med.
5_TCGCACTAGTCATTGC-1	0.918888	PT S3 med.
5_TCGCAGGAGTGTCATC-1	0.934758	PT S3 med.
5_TCGGGTGCATCGAAGG-1	0.905272	PT S3 med.
5_TCGGTCTCAAATTGGA-1	0.916368	PT S3 med.
5_TCTGCCACAGGCACTC-1	0.893058	PT S3 med.
5_TGACCCTCAACACGAG-1	0.886007	PT S3 med.
5_TGAGACTTCTAACACG-1	0.896224	PT S3 med.
5_TGAGTCACACCTGAAT-1	0.907024	PT S3 med.
5_TGCATCCGTGAGTCAG-1	0.840917	PT S3 med.
5_TGCGGCATCACACGAT-1	0.867897	PT S3 med.
5_TGGATGTCAATAGTCC-1	0.898605	PT S3 med.
5_TGGCGTGAGGCACAAC-1	0.886438	PT S3 med.
5_TGGGATTCAGGTTTAC-1	0.895806	PT S3 med.
5_TGGGCGTAGCACGTCC-1	0.911515	PT S3 med.
5_TGGTACAGTCGCATCG-1	0.932573	PT S3 med.
5_TGTCAGACATAATCGC-1	0.912196	PT S3 med.
5_TGTCCCAAGTCCCGAC-1	0.948312	PT S3 med.
5_TGTGGCGGTAAGGAGA-1	0.915401	PT S3 med.
5_TGTTCTAAGTACTGTC-1	0.914291	PT S3 med.
5_TGTTGGAGTACAAAGT-1	0.915846	PT S3 med.
5_TGTTTGTAGAACGTGC-1	0.900114	PT S3 med.
5_TTACTGTGTGGAACAC-1	0.896779	PT S3 med.
5_TTATTGCCACGTTGGC-1	0.893812	PT S3 med.
5_TTCATGTTCGCGTAGC-1	0.934084	PT S3 med.
5_TTCGATTGTTCTCGTC-1	0.932402	PT S3 med.
5_TTCGCTGCAAGAGATT-1	0.898223	PT S3 med.
5_TTCTAGTTCGTTCGCT-1	0.918031	PT S3 med.
5_TTCTCTCCACATTGTG-1	0.907768	PT S3 med.
5_TTGATGGGTTATCCAG-1	0.887567	PT S3 med.
5_TTGCCTGAGAGGCCAT-1	0.901514	PT S3 med.
5_TTGCTGCTCGGAGATG-1	0.918382	PT S3 med.
5_TTGGATGAGCCATTGT-1	0.905491	PT S3 med.
5_TTGGATGGTAGGAGGG-1	0.90529	PT S3 med.
5_TTGGGTATCCCTCGAT-1	0.895457	PT S3 med.
5_TTGTGTTCAAACCATC-1	0.910527	PT S3 med.
5_TTGTTGTCATCATTTC-1	0.888816	PT S3 med.
5_TTTACTGGTATTTCTC-1	0.925997	PT S3 med.
5_TTTATGCTCTAGCCAA-1	0.842501	PT S3 med.
5_TTTGATCAGGAATCGC-1	0.872145	PT S3 med.
6_AAAGGTACAATTCTCT-1	0.638759	PT S3 med.
6_AAAGTGACATAATGCC-1	0.657947	PT S3 med.
6_AAATGGATCGTTACCC-1	0.652078	PT S3 med.
6_AACCATGCATATACCG-1	0.642334	PT S3 med.
6_AACCATGGTATGCGGA-1	0.64743	PT S3 med.
6_AACCTTTCACTGGCGT-1	0.768676	PT S3 med.
6_AACGAAACAGCTGTCG-1	0.621038	PT S3 med.
6_AACGTCAGTATGCGGA-1	0.650371	PT S3 med.
6_AAGACTCTCTGGAAGG-1	0.665681	PT S3 med.
6_AAGATAGAGCTAGAAT-1	0.644513	PT S3 med.
6_AAGCATCCACGTGAGA-1	0.643088	PT S3 med.
6_AAGCGTTAGCTACTAC-1	0.65857	PT S3 med.
6_AAGCGTTGTGAGCAGT-1	0.6177	PT S3 med.
6_AATGCCACACAAGCAG-1	0.664747	PT S3 med.
6_AATGGAAGTCGGTGTC-1	0.663689	PT S3 med.
6_AATTCCTCATGACTGT-1	0.641679	PT S3 med.
6_ACAAGCTGTGAGGAAA-1	0.627562	PT S3 med.
6_ACACAGTTCAGAGTGG-1	0.642011	PT S3 med.
6_ACACGCGAGAGGCGGA-1	0.642918	PT S3 med.
6_ACATGCAAGGGAGTGG-1	0.653788	PT S3 med.
6_ACCAACAAGATAGCAT-1	0.711908	PT S3 med.
6_ACCCAAATCCAACTGA-1	0.660438	PT S3 med.
6_ACCTGTCTCGCCGAAC-1	0.673903	PT S3 med.
6_ACGATGTTCCCGTTGT-1	0.645271	PT S3 med.
6_ACGCACGCAACGATTC-1	0.662779	PT S3 med.
6_ACGCACGTCGCATGAT-1	0.647942	PT S3 med.
6_ACGTACAAGCTCGAAG-1	0.661591	PT S3 med.
6_ACGTAGTTCATGCCCT-1	0.658289	PT S3 med.
6_ACGTCCTAGTTCAACC-1	0.659035	PT S3 med.
6_ACGTCCTGTGTGTTTG-1	0.65883	PT S3 med.
6_ACGTTCCCACGACCTG-1	0.652568	PT S3 med.
6_ACTCCCACAGGTAGTG-1	0.655885	PT S3 med.
6_ACTCTCGAGATGCTGG-1	0.66542	PT S3 med.
6_ACTCTCGCAATGAGCG-1	0.653701	PT S3 med.
6_ACTCTCGTCGGTATGT-1	0.656384	PT S3 med.
6_ACTGCAACAACACACT-1	0.645646	PT S3 med.
6_ACTGTCCTCTCACTCG-1	0.655851	PT S3 med.
6_ACTGTGAGTGCCCACA-1	0.66671	PT S3 med.
6_ACTTATCCAACACACT-1	0.647969	PT S3 med.
6_ACTTCCGAGCGTTACT-1	0.663913	PT S3 med.
6_ACTTCCGTCCCTCTCC-1	0.668576	PT S3 med.
6_ACTTTGTGTCTTACAG-1	0.656295	PT S3 med.
6_ACTTTGTTCTGAACGT-1	0.657255	PT S3 med.
6_AGAACAAGTCATTGCA-1	0.666844	PT S3 med.
6_AGAAGCGGTTGCATGT-1	0.656177	PT S3 med.
6_AGAAGTAGTTGTACGT-1	0.660095	PT S3 med.
6_AGACCCGTCCAGCCTT-1	0.653279	PT S3 med.
6_AGATAGACACCCTGTT-1	0.642353	PT S3 med.
6_AGCCAGCCAGCTCATA-1	0.655808	PT S3 med.
6_AGCGATTGTTTCACTT-1	0.645941	PT S3 med.
6_AGCTACACACTGTGAT-1	0.636738	PT S3 med.
6_AGCTTCCCAAGTATCC-1	0.66388	PT S3 med.
6_AGGAAATGTATCAGGG-1	0.670427	PT S3 med.
6_AGGCCACCAGTTGAAA-1	0.589214	PT S3 med.
6_AGGGCCTAGCTAAGTA-1	0.650388	PT S3 med.
6_AGGGTTTTCTTCCTAA-1	0.60621	PT S3 med.
6_AGGTCATAGTGCTAGG-1	0.66062	PT S3 med.
6_AGGTGTTAGCGTGAGT-1	0.603073	PT S3 med.
6_AGTTCCCTCCCTTCCC-1	0.6492	PT S3 med.
6_AGTTCGAAGGTCCAGA-1	0.662336	PT S3 med.
6_ATAGACCTCTTAGGAC-1	0.653817	PT S3 med.
6_ATATCCTAGATGAATC-1	0.643008	PT S3 med.
6_ATCACGACAATCAAGA-1	0.672367	PT S3 med.
6_ATCCACCCAAAGGTTA-1	0.657806	PT S3 med.
6_ATCCATTAGAGCCGTA-1	0.65565	PT S3 med.
6_ATCCTATAGTGTTCAC-1	0.661677	PT S3 med.
6_ATCGCCTAGAGAGCGG-1	0.641938	PT S3 med.
6_ATCGCCTAGCTGAAAT-1	0.671369	PT S3 med.
6_ATCGGCGTCTGGCTGG-1	0.662127	PT S3 med.
6_ATCGTAGCACCGAATT-1	0.624004	PT S3 med.
6_ATCGTGAAGGGATCAC-1	0.664655	PT S3 med.
6_ATCGTGAAGTATTGCC-1	0.610646	PT S3 med.
6_ATGACCATCGCCGAAC-1	0.661751	PT S3 med.
6_ATGAGGGGTTGATGTC-1	0.642497	PT S3 med.
6_ATGATCGCATCTGCGG-1	0.659924	PT S3 med.
6_ATGCGATGTTCACGAT-1	0.658363	PT S3 med.
6_ATTACCTTCATGAGGG-1	0.631509	PT S3 med.
6_ATTACTCAGCCTCAAT-1	0.651489	PT S3 med.
6_ATTCACTGTCGCCACA-1	0.659262	PT S3 med.
6_ATTCTACGTTTGATCG-1	0.716613	PT S3 med.
6_ATTTCACAGGGTTGCA-1	0.647335	PT S3 med.
6_ATTTCTGCAGCCGTCA-1	0.632962	PT S3 med.
6_CAACCTCCAGACGATG-1	0.626003	PT S3 med.
6_CAACGGCAGCCATATC-1	0.650289	PT S3 med.
6_CAAGGGATCGCGTGAC-1	0.652642	PT S3 med.
6_CAATCGACAGAAGCTG-1	0.660184	PT S3 med.
6_CACATGATCAGGTAAA-1	0.657962	PT S3 med.
6_CACCGTTGTTCCACAA-1	0.611322	PT S3 med.
6_CACGGGTTCTTCTTCC-1	0.661051	PT S3 med.
6_CACGTGGGTGGACTGA-1	0.644422	PT S3 med.
6_CACGTTCAGTGTCATC-1	0.661554	PT S3 med.
6_CACTGAAAGATGGTAT-1	0.644599	PT S3 med.
6_CAGATACGTCATCCGG-1	0.662165	PT S3 med.
6_CAGATACTCTGACGCG-1	0.651133	PT S3 med.
6_CAGATCAGTGAGGAAA-1	0.66391	PT S3 med.
6_CAGATTGCATACAGGG-1	0.644213	PT S3 med.
6_CAGCCAGAGTACGTCT-1	0.643784	PT S3 med.
6_CAGGGCTCACCAGGTC-1	0.648178	PT S3 med.
6_CAGGGCTTCTCTCTTC-1	0.645069	PT S3 med.
6_CAGTGCGCAGTAGAGC-1	0.65056	PT S3 med.
6_CATGCCTGTGTCGCTG-1	0.657584	PT S3 med.
6_CATGCTCGTTGTCCCT-1	0.639745	PT S3 med.
6_CATGGATAGATTGACA-1	0.660545	PT S3 med.
6_CATGGTAAGACGGTTG-1	0.660801	PT S3 med.
6_CATTCCGAGCTAGAAT-1	0.660616	PT S3 med.
6_CCACACTAGTATGAAC-1	0.646619	PT S3 med.
6_CCACGAGTCTGAGAAA-1	0.659096	PT S3 med.
6_CCACGTTTCTTAAGGC-1	0.655967	PT S3 med.
6_CCACTTGCACCATATG-1	0.647804	PT S3 med.
6_CCACTTGCACTCTAGA-1	0.65649	PT S3 med.
6_CCATAAGCAAGAATGT-1	0.650996	PT S3 med.
6_CCCGGAAGTCCTGGGT-1	0.524173	PT S3 med.
6_CCCGGAATCTGCAGCG-1	0.660803	PT S3 med.
6_CCCTCAAAGTCGAGGT-1	0.656551	PT S3 med.
6_CCCTTAGGTGACGTCC-1	0.664665	PT S3 med.
6_CCGCAAGGTTCATCGA-1	0.662731	PT S3 med.
6_CCGGGTATCCACTTTA-1	0.667996	PT S3 med.
6_CCGGTAGAGTAGTGCG-1	0.65126	PT S3 med.
6_CCTAAGAGTCTACACA-1	0.660894	PT S3 med.
6_CCTAAGATCTCCATAT-1	0.65011	PT S3 med.
6_CCTACGTAGTATTCCG-1	0.655484	PT S3 med.
6_CCTACGTCACAGAGAC-1	0.644464	PT S3 med.
6_CCTGTTGTCAGTCCGG-1	0.622768	PT S3 med.
6_CCTTCAGTCTTTGCTA-1	0.652063	PT S3 med.
6_CCTTGTGGTCATCAGT-1	0.663956	PT S3 med.
6_CCTTGTGGTTCAGTAC-1	0.653452	PT S3 med.
6_CGAAGTTCAATCGCAT-1	0.640309	PT S3 med.
6_CGAAGTTTCCCAAGCG-1	0.64619	PT S3 med.
6_CGAATTGAGCAATAAC-1	0.638697	PT S3 med.
6_CGAATTGGTGACTCGC-1	0.652327	PT S3 med.
6_CGAGAAGTCTTTGGAG-1	0.658707	PT S3 med.
6_CGAGGAATCAACTGGT-1	0.697159	PT S3 med.
6_CGAGTTAAGGCGAACT-1	0.662644	PT S3 med.
6_CGAGTTACACCTCTAC-1	0.645534	PT S3 med.
6_CGATCGGTCCCGTTCA-1	0.659771	PT S3 med.
6_CGATGGCAGCGCAATG-1	0.639195	PT S3 med.
6_CGCATAAAGTTCATGC-1	0.640814	PT S3 med.
6_CGCGTGACAGTCGCTG-1	0.661165	PT S3 med.
6_CGGCAGTGTAAGAACT-1	0.627081	PT S3 med.
6_CGGCAGTGTAGGTACG-1	0.648968	PT S3 med.
6_CGGGCATGTCACAGTT-1	0.660031	PT S3 med.
6_CGGGCATTCGCTACAA-1	0.64536	PT S3 med.
6_CGTAATGTCAGACCGC-1	0.659858	PT S3 med.
6_CGTAGTACAACAGAGC-1	0.662479	PT S3 med.
6_CGTGCTTTCAAGATAG-1	0.647857	PT S3 med.
6_CGTGTCTCATGCCATA-1	0.661065	PT S3 med.
6_CGTTAGAGTACAGGTG-1	0.648764	PT S3 med.
6_CGTTAGAGTGAAGCTG-1	0.658234	PT S3 med.
6_CTACAGAGTTCAAGGG-1	0.641131	PT S3 med.
6_CTACGGGAGCACTGGA-1	0.66402	PT S3 med.
6_CTACTATAGAGCAAGA-1	0.655196	PT S3 med.
6_CTACTATAGGCTAAAT-1	0.752968	PT S3 med.
6_CTATCCGCAAATCAGA-1	0.659604	PT S3 med.
6_CTATCTACAAATGATG-1	0.633119	PT S3 med.
6_CTATCTACAGATCCTA-1	0.750776	PT S3 med.
6_CTATCTAGTTGACTGT-1	0.655304	PT S3 med.
6_CTCACTGGTCCGGCAT-1	0.647113	PT S3 med.
6_CTCATCGGTATCGTTG-1	0.63989	PT S3 med.
6_CTCATGCCAGATACCT-1	0.648333	PT S3 med.
6_CTCCACAAGGAGAGTA-1	0.645231	PT S3 med.
6_CTCCCAAAGCAGAAAG-1	0.655189	PT S3 med.
6_CTCCCTCTCACGAACT-1	0.661442	PT S3 med.
6_CTCCGATAGAGGGTCT-1	0.654149	PT S3 med.
6_CTCCTCCAGCAGCCCT-1	0.6425	PT S3 med.
6_CTGAGGCGTACCAGAG-1	0.654017	PT S3 med.
6_CTGATCCCAGAACTAA-1	0.682723	PT S3 med.
6_CTGCCTACACTATGTG-1	0.645972	PT S3 med.
6_CTGCCTACATGGCTGC-1	0.657383	PT S3 med.
6_CTGCCTATCGTTGTGA-1	0.661492	PT S3 med.
6_CTGGCAGCAGAGTTCT-1	0.661379	PT S3 med.
6_CTGGCAGTCTTGCAAG-1	0.644365	PT S3 med.
6_CTGGTCTAGGCTTTCA-1	0.643193	PT S3 med.
6_CTGGTCTGTTCGATTG-1	0.653046	PT S3 med.
6_CTGTAGAAGGCATCAG-1	0.663814	PT S3 med.
6_CTGTATTGTTCCGGTG-1	0.651216	PT S3 med.
6_CTGTCGTTCTTGCAGA-1	0.655057	PT S3 med.
6_CTGTGAACAGGACGAT-1	0.643998	PT S3 med.
6_CTGTGAAGTACTAGCT-1	0.650109	PT S3 med.
6_CTTACCGCAACCGCCA-1	0.641655	PT S3 med.
6_CTTAGGACAGCAGTCC-1	0.655462	PT S3 med.
6_CTTCGGTGTACACGCC-1	0.657734	PT S3 med.
6_CTTGATTAGATAGTCA-1	0.653998	PT S3 med.
6_CTTTCGGTCGACCACG-1	0.655799	PT S3 med.
6_GAACGTTGTCTAACGT-1	0.638082	PT S3 med.
6_GAACTGTGTCTTCTAT-1	0.73637	PT S3 med.
6_GAAGAATGTTTCGTTT-1	0.640108	PT S3 med.
6_GAAGCGAAGTCTGCAT-1	0.663855	PT S3 med.
6_GAAGGACTCGAGCCAC-1	0.653132	PT S3 med.
6_GAATCACGTCGCCTAG-1	0.652776	PT S3 med.
6_GACATCAAGAGGATCC-1	0.639985	PT S3 med.
6_GACCAATGTTTCCAAG-1	0.635389	PT S3 med.
6_GACCGTGTCATTTCGT-1	0.6578	PT S3 med.
6_GACTATGAGCAAGCCA-1	0.661352	PT S3 med.
6_GAGACCCAGCAGAAAG-1	0.649264	PT S3 med.
6_GAGCTGCCAAAGCTAA-1	0.655675	PT S3 med.
6_GAGCTGCTCGACGACC-1	0.653786	PT S3 med.
6_GAGGGATCAAGCGAGT-1	0.629574	PT S3 med.
6_GAGTCATAGGTATCTC-1	0.665787	PT S3 med.
6_GAGTCATCACTGGAAG-1	0.659082	PT S3 med.
6_GAGTGAGTCGGCATAT-1	0.656912	PT S3 med.
6_GAGTGTTAGATGCTTC-1	0.66369	PT S3 med.
6_GAGTGTTGTGTGCCTG-1	0.644386	PT S3 med.
6_GATCAGTTCATCTACT-1	0.668119	PT S3 med.
6_GATGAGGGTCTCTCTG-1	0.668933	PT S3 med.
6_GATGATCGTGTGTCCG-1	0.655966	PT S3 med.
6_GATGTTGCAGGTCAGA-1	0.647985	PT S3 med.
6_GATTCTTAGTCACTGT-1	0.662461	PT S3 med.
6_GATTTCTAGGTGAGCT-1	0.65712	PT S3 med.
6_GATTTCTGTACACGTT-1	0.659379	PT S3 med.
6_GCAACATGTTAGAAGT-1	0.660938	PT S3 med.
6_GCACGGTTCAAAGACA-1	0.66598	PT S3 med.
6_GCACGTGTCTTACGTT-1	0.653971	PT S3 med.
6_GCAGCCATCCACGAAT-1	0.661418	PT S3 med.
6_GCATGATGTTCGGCGT-1	0.634365	PT S3 med.
6_GCATTAGTCTTGCGCT-1	0.662579	PT S3 med.
6_GCCAGGTCAGGGTTGA-1	0.755834	PT S3 med.
6_GCCATTCCACAGCGCT-1	0.646518	PT S3 med.
6_GCCCGAACACATATGC-1	0.64011	PT S3 med.
6_GCGAGAAAGATACTGA-1	0.663008	PT S3 med.
6_GCGGAAAAGCGTGAGT-1	0.656677	PT S3 med.
6_GCGGAAACAAACTAAG-1	0.640549	PT S3 med.
6_GCGTGCAAGCTCCCTT-1	0.628983	PT S3 med.
6_GCTACAAAGCTCGTGC-1	0.631213	PT S3 med.
6_GCTACAAAGTGCAGCA-1	0.650433	PT S3 med.
6_GCTACCTAGAACCGCA-1	0.65986	PT S3 med.
6_GCTCAAACATGTGGTT-1	0.660347	PT S3 med.
6_GCTCAAAGTTTGGGTT-1	0.654974	PT S3 med.
6_GCTGCAGGTGCCTACG-1	0.657777	PT S3 med.
6_GCTGGGTGTTCCATTT-1	0.64262	PT S3 med.
6_GGACGTCCATAGTCAC-1	0.645907	PT S3 med.
6_GGATGTTCAACTACGT-1	0.665418	PT S3 med.
6_GGATGTTCACGGCCAT-1	0.661528	PT S3 med.
6_GGCACGTGTGTTAGCT-1	0.650688	PT S3 med.
6_GGGAAGTAGGCCATAG-1	0.661196	PT S3 med.
6_GGGAAGTTCAACACGT-1	0.657835	PT S3 med.
6_GGGACAATCCTTTAGT-1	0.658056	PT S3 med.
6_GGGATCCTCGCAATGT-1	0.632519	PT S3 med.
6_GGGATGAGTGGCATCC-1	0.649729	PT S3 med.
6_GGGATGATCAGCATTG-1	0.650994	PT S3 med.
6_GGGTCACCATCTTAGG-1	0.623253	PT S3 med.
6_GGGTTTAGTACATTGC-1	0.653598	PT S3 med.
6_GGTAACTGTCGCTGCA-1	0.644844	PT S3 med.
6_GGTCACGTCGAAATCC-1	0.657416	PT S3 med.
6_GGTTCTCCAGGACAGT-1	0.664213	PT S3 med.
6_GTACAACGTCCTTGTC-1	0.658571	PT S3 med.
6_GTACAGTAGTTGCCCG-1	0.655181	PT S3 med.
6_GTAGGTTGTGTCTTGA-1	0.655057	PT S3 med.
6_GTCAAACGTATCGTAC-1	0.647685	PT S3 med.
6_GTCAAGTAGATCGGTG-1	0.656037	PT S3 med.
6_GTCATGAAGAAGGGAT-1	0.680435	PT S3 med.
6_GTCGAATCAAAGGTTA-1	0.63804	PT S3 med.
6_GTCGTTCAGCATGGGT-1	0.658783	PT S3 med.
6_GTCTACCGTCGCGTCA-1	0.646048	PT S3 med.
6_GTCTCACGTCAGTCCG-1	0.654407	PT S3 med.
6_GTCTGTCAGCAGGCTA-1	0.663962	PT S3 med.
6_GTGCACGAGGGTCAAC-1	0.655363	PT S3 med.
6_GTGCTTCAGTCACAGG-1	0.64057	PT S3 med.
6_GTGCTTCTCGTGCAGC-1	0.637082	PT S3 med.
6_GTGGAAGGTTACCTTT-1	0.649193	PT S3 med.
6_GTGGCGTCAGTTAGAA-1	0.659384	PT S3 med.
6_GTGTAACAGATGGTCG-1	0.650239	PT S3 med.
6_GTGTGATAGGCGCTTC-1	0.669494	PT S3 med.
6_GTGTGATGTATCTCTT-1	0.659261	PT S3 med.
6_GTGTTCCGTGAATTGA-1	0.663024	PT S3 med.
6_GTTACAGCATCCGAAT-1	0.643455	PT S3 med.
6_GTTAGACCACAGCTGC-1	0.627338	PT S3 med.
6_GTTAGACCAGTTCTAG-1	0.653818	PT S3 med.
6_GTTAGTGAGGTCATCT-1	0.65469	PT S3 med.
6_GTTGCGGTCGACGATT-1	0.652767	PT S3 med.
6_TAACCAGCACCCTTAC-1	0.7426	PT S3 med.
6_TAAGCCAGTAAGGCCA-1	0.665786	PT S3 med.
6_TAAGTCGCATCGGATT-1	0.642118	PT S3 med.
6_TAATCTCCAAGTGGTG-1	0.655649	PT S3 med.
6_TAATTCCCACTCAAGT-1	0.644067	PT S3 med.
6_TACAGGTAGGTCACCC-1	0.624432	PT S3 med.
6_TACCGGGAGTGAGGTC-1	0.655348	PT S3 med.
6_TACCTGCCAATGCAGG-1	0.65554	PT S3 med.
6_TACGTCCTCCCTCTCC-1	0.668744	PT S3 med.
6_TACTGCCGTTGGACCC-1	0.658255	PT S3 med.
6_TACTTGTAGCTCGCAC-1	0.633269	PT S3 med.
6_TAGAGTCTCAAACGAA-1	0.667319	PT S3 med.
6_TAGGGTTTCAAACCTG-1	0.648575	PT S3 med.
6_TAGGTACCACTAAACC-1	0.633687	PT S3 med.
6_TATATCCAGGGCTGAT-1	0.621942	PT S3 med.
6_TCAAGCATCTTGTGCC-1	0.643692	PT S3 med.
6_TCACGCTCAATACAGA-1	0.672529	PT S3 med.
6_TCACGGGAGGTGTGAC-1	0.658	PT S3 med.
6_TCACTCGCAGCTTCGG-1	0.660382	PT S3 med.
6_TCACTCGTCTATCCAT-1	0.645969	PT S3 med.
6_TCAGCAAAGCAGGTCA-1	0.658808	PT S3 med.
6_TCAGTCCTCGGCTGGT-1	0.672647	PT S3 med.
6_TCATCATTCTTGGTGA-1	0.667102	PT S3 med.
6_TCATCCGGTTTGAACC-1	0.664529	PT S3 med.
6_TCATGCCAGCAACTCT-1	0.640311	PT S3 med.
6_TCATGGATCGCGATCG-1	0.669506	PT S3 med.
6_TCATGTTCACCCTAGG-1	0.657218	PT S3 med.
6_TCATGTTGTACTCGTA-1	0.63657	PT S3 med.
6_TCATTCAAGCTGCCAC-1	0.650064	PT S3 med.
6_TCATTGTCATGAAAGT-1	0.633207	PT S3 med.
6_TCCCAGTAGCATTTCG-1	0.654533	PT S3 med.
6_TCCCATGCAGATCCAT-1	0.663248	PT S3 med.
6_TCCGAAAAGTCATCCA-1	0.666393	PT S3 med.
6_TCCTCTTTCTGCGGCA-1	0.608125	PT S3 med.
6_TCCTGCATCGCAGTGC-1	0.664527	PT S3 med.
6_TCGAACATCGACGCTG-1	0.65607	PT S3 med.
6_TCGAAGTCAATAGTGA-1	0.655689	PT S3 med.
6_TCGAAGTCACAAATCC-1	0.662001	PT S3 med.
6_TCGCTCACATTCGGGC-1	0.658299	PT S3 med.
6_TCGTCCATCAGCTTCC-1	0.657788	PT S3 med.
6_TCGTGGGTCTAGAGCT-1	0.612299	PT S3 med.
6_TCTATACAGTCTCTGA-1	0.654221	PT S3 med.
6_TCTCAGCAGCACTCCG-1	0.655322	PT S3 med.
6_TCTCAGCAGCCTAACT-1	0.65261	PT S3 med.
6_TCTGGCTAGGCGCTCT-1	0.66009	PT S3 med.
6_TCTTCCTCACAGTGTT-1	0.626734	PT S3 med.
6_TCTTTGAGTTGAATCC-1	0.658593	PT S3 med.
6_TGAATCGCAGTAGAGC-1	0.666573	PT S3 med.
6_TGAATGCGTTGAATCC-1	0.668233	PT S3 med.
6_TGAGGTTAGGTCGAGT-1	0.657608	PT S3 med.
6_TGAGTCATCCTTTAGT-1	0.665541	PT S3 med.
6_TGATTCTCAGGTGACA-1	0.652717	PT S3 med.
6_TGCACGGAGGCGCTTC-1	0.675851	PT S3 med.
6_TGCAGATTCACCGACG-1	0.644603	PT S3 med.
6_TGCGGCAGTCACCGAC-1	0.654357	PT S3 med.
6_TGCGGCAGTCATATGC-1	0.646946	PT S3 med.
6_TGCTTCGAGGATATGT-1	0.66646	PT S3 med.
6_TGCTTCGCACGGTGAA-1	0.642747	PT S3 med.
6_TGCTTGCAGACTAAGT-1	0.665112	PT S3 med.
6_TGGGCGTAGGTTTACC-1	0.641505	PT S3 med.
6_TGGGCGTAGTCATTGC-1	0.653909	PT S3 med.
6_TGGTGATCATCTCGTC-1	0.642783	PT S3 med.
6_TGTAACGGTTCGGTAT-1	0.65281	PT S3 med.
6_TGTCAGAGTCATATGC-1	0.652885	PT S3 med.
6_TGTCAGAGTGTTCCAA-1	0.669483	PT S3 med.
6_TGTCCCATCGCTGTTC-1	0.650356	PT S3 med.
6_TGTTCCGGTGAACCGA-1	0.645326	PT S3 med.
6_TGTTCCGTCTCAGGCG-1	0.649374	PT S3 med.
6_TGTTTGTTCCAGTGTA-1	0.655434	PT S3 med.
6_TTAATCCGTACGACTT-1	0.653432	PT S3 med.
6_TTACAGGCATCTGTTT-1	0.656593	PT S3 med.
6_TTACCGCCAGTTGTCA-1	0.664768	PT S3 med.
6_TTACTGTCAAATTGCC-1	0.625561	PT S3 med.
6_TTAGGCAAGTGCACTT-1	0.750164	PT S3 med.
6_TTAGTCTAGTAGGATT-1	0.648965	PT S3 med.
6_TTCAGGAAGGTCGTAG-1	0.659948	PT S3 med.
6_TTCATGTTCCTCTAGC-1	0.661191	PT S3 med.
6_TTCCACGAGTCCCAAT-1	0.691304	PT S3 med.
6_TTCCGTGTCTATCGTT-1	0.657219	PT S3 med.
6_TTCCTTCTCAGGAACG-1	0.66473	PT S3 med.
6_TTCGGTCTCGGAACTT-1	0.641112	PT S3 med.
6_TTCTCTCCATGCCGAC-1	0.626037	PT S3 med.
6_TTCTGTAAGTAACCTC-1	0.655697	PT S3 med.
6_TTGAACGCATTGAAAG-1	0.655509	PT S3 med.
6_TTGACCCCAGCATCTA-1	0.662387	PT S3 med.
6_TTGAGTGCATGGTGGA-1	0.740881	PT S3 med.
6_TTGATGGAGGGTTGCA-1	0.688309	PT S3 med.
6_TTGCATTAGAGCACTG-1	0.6811	PT S3 med.
6_TTGCCTGGTTAGGCTT-1	0.655372	PT S3 med.
6_TTGCTGCGTCACTCAA-1	0.658594	PT S3 med.
6_TTGCTGCGTCGTTCAA-1	0.645533	PT S3 med.
6_TTGGATGCAGCCTTCT-1	0.666781	PT S3 med.
6_TTGGATGGTACCCGAC-1	0.646712	PT S3 med.
6_TTGTTCAGTTCGTTCC-1	0.636503	PT S3 med.
6_TTTACGTAGACTTCCA-1	0.659852	PT S3 med.
6_TTTCGATCACAGAGCA-1	0.655419	PT S3 med.
6_TTTGGAGGTACCCAGC-1	0.645895	PT S3 med.
6_TTTGGAGTCTCGCAGG-1	0.75057	PT S3 med.
6_TTTGGTTCAACAAGTA-1	0.650324	PT S3 med.
9_AAACGAACAAGACCGA-1	0.718237	PT S3 med.
9_AAAGAACAGGTCTACT-1	0.734555	PT S3 med.
9_AAAGGGCGTGCTGCAC-1	0.733534	PT S3 med.
9_AAAGGTACATGGCGCT-1	0.769793	PT S3 med.
9_AAAGTCCAGAAGATCT-1	0.739894	PT S3 med.
9_AAAGTGAAGACATATG-1	0.725643	PT S3 med.
9_AACAACCTCAGCATTG-1	0.741239	PT S3 med.
9_AACAACCTCCCTTTGG-1	0.764336	PT S3 med.
9_AACAGGGCACACGGAA-1	0.741334	PT S3 med.
9_AACCAACAGACATATG-1	0.726996	PT S3 med.
9_AACCAACCAACTGTGT-1	0.780939	PT S3 med.
9_AACCACATCCCGATCT-1	0.730361	PT S3 med.
9_AACCCAAGTCTTGCTC-1	0.769456	PT S3 med.
9_AACCCAAGTTGATCGT-1	0.809234	PT S3 med.
9_AACCTTTTCACACCCT-1	0.727102	PT S3 med.
9_AACGAAAGTTAGAAGT-1	0.767268	PT S3 med.
9_AAGAACAGTCGCACAC-1	0.749837	PT S3 med.
9_AAGAACAGTTCTCCTG-1	0.741315	PT S3 med.
9_AAGATAGAGGTAACTA-1	0.734312	PT S3 med.
9_AAGCCATAGGTAATCA-1	0.741866	PT S3 med.
9_AAGCCATGTGAGTTGG-1	0.727832	PT S3 med.
9_AAGGTAAGTTAAGCAA-1	0.718788	PT S3 med.
9_AATCGTGAGTAGACCG-1	0.731891	PT S3 med.
9_AATCGTGCACTCGATA-1	0.725807	PT S3 med.
9_AATGGCTAGAATAACC-1	0.733042	PT S3 med.
9_AATTCCTTCAGTGTGT-1	0.730664	PT S3 med.
9_ACAACCAAGCTGAGCA-1	0.738741	PT S3 med.
9_ACAGCCGAGTAACCTC-1	0.736556	PT S3 med.
9_ACAGGGAAGAAGGCTC-1	0.721321	PT S3 med.
9_ACAGGGACAGAGTAAT-1	0.733702	PT S3 med.
9_ACATCGAGTCTTTCTA-1	0.735206	PT S3 med.
9_ACATGCAGTGTTACAC-1	0.763007	PT S3 med.
9_ACCAACACAATCAAGA-1	0.749419	PT S3 med.
9_ACCACAATCCGCATAA-1	0.724878	PT S3 med.
9_ACCCAAAAGTGAGGTC-1	0.7281	PT S3 med.
9_ACCCTTGCATGGACAG-1	0.746656	PT S3 med.
9_ACCGTTCCAGAGTTGG-1	0.731717	PT S3 med.
9_ACCGTTCGTGCCGTAC-1	0.73013	PT S3 med.
9_ACCGTTCTCGATTCCC-1	0.744126	PT S3 med.
9_ACCTACCAGGATTACA-1	0.743306	PT S3 med.
9_ACCTGAATCCTGGGTG-1	0.725343	PT S3 med.
9_ACGGTTACAAGATGTA-1	0.753548	PT S3 med.
9_ACGTAGTCACTCTGCT-1	0.736091	PT S3 med.
9_ACGTAGTGTCACTTAG-1	0.733645	PT S3 med.
9_ACGTCCTAGGATGGCT-1	0.749954	PT S3 med.
9_ACGTTCCCATGTGCTA-1	0.731906	PT S3 med.
9_ACTATCTAGGACAAGA-1	0.741693	PT S3 med.
9_ACTATGGAGCTATCTG-1	0.728496	PT S3 med.
9_ACTATTCGTAGAGTTA-1	0.735219	PT S3 med.
9_ACTCCCAAGCGGTATG-1	0.726423	PT S3 med.
9_ACTCCCATCAGATTGC-1	0.765025	PT S3 med.
9_ACTTCGCGTGCGGATA-1	0.743528	PT S3 med.
9_ACTTTCAAGTATGAGT-1	0.754921	PT S3 med.
9_ACTTTCACAGTCAGCC-1	0.744371	PT S3 med.
9_ACTTTCAGTTGGGTAG-1	0.720216	PT S3 med.
9_ACTTTGTCAATGGCAG-1	0.745644	PT S3 med.
9_AGAAATGTCAGCTTGA-1	0.741413	PT S3 med.
9_AGAAGTATCACCTTAT-1	0.802499	PT S3 med.
9_AGACAAAAGCCGTTGC-1	0.735505	PT S3 med.
9_AGACACTCATGGCTAT-1	0.794052	PT S3 med.
9_AGACAGGAGAGCCTGA-1	0.74982	PT S3 med.
9_AGAGAATGTGCTCGTG-1	0.727837	PT S3 med.
9_AGAGAGCCACAGTATC-1	0.760024	PT S3 med.
9_AGAGAGCGTTCTAACG-1	0.777127	PT S3 med.
9_AGCATCAGTAGATTAG-1	0.732871	PT S3 med.
9_AGCCACGGTGCCCAGT-1	0.738381	PT S3 med.
9_AGCGATTCAGGTCAAG-1	0.811534	PT S3 med.
9_AGCGTATTCACAATGC-1	0.732147	PT S3 med.
9_AGCTACACACTGTTCC-1	0.735657	PT S3 med.
9_AGCTCAAGTGCGACAA-1	0.724084	PT S3 med.
9_AGGACTTGTGACCGAA-1	0.746819	PT S3 med.
9_AGGATAATCCTCAGAA-1	0.740167	PT S3 med.
9_AGGCCACCAAGAGATT-1	0.734618	PT S3 med.
9_AGGCTGCAGCTCACTA-1	0.737117	PT S3 med.
9_AGGGTCCTCAACACGT-1	0.740776	PT S3 med.
9_AGGGTTTGTTGTTTGG-1	0.797843	PT S3 med.
9_AGTACCACAGAGGTAC-1	0.769108	PT S3 med.
9_AGTGACTGTGTAACGG-1	0.754538	PT S3 med.
9_AGTGACTTCCTACCGT-1	0.732992	PT S3 med.
9_AGTGTTGAGTACAGCG-1	0.781008	PT S3 med.
9_ATAGGCTTCCTACTGC-1	0.7585	PT S3 med.
9_ATATCCTCATCTGGGC-1	0.735567	PT S3 med.
9_ATCAGGTGTACCCAGC-1	0.74675	PT S3 med.
9_ATCCCTGAGCTCCATA-1	0.751975	PT S3 med.
9_ATCGGATCATAGGAGC-1	0.752887	PT S3 med.
9_ATCTTCACAGAGACTG-1	0.72685	PT S3 med.
9_ATGAGGGCAAATCAGA-1	0.726191	PT S3 med.
9_ATGAGTCAGTTCATCG-1	0.836905	PT S3 med.
9_ATGATCGTCTGTGTGA-1	0.753377	PT S3 med.
9_ATGCATGGTCTGCGCA-1	0.802695	PT S3 med.
9_ATGCCTCTCGAAGCAG-1	0.75351	PT S3 med.
9_ATGCGATAGATAGCAT-1	0.732936	PT S3 med.
9_ATGGGAGAGGTTCCGC-1	0.724556	PT S3 med.
9_ATTCAGGCAACACAGG-1	0.729798	PT S3 med.
9_ATTCATCTCGTCAAAC-1	0.838195	PT S3 med.
9_ATTCTACTCACTTATC-1	0.74335	PT S3 med.
9_ATTCTTGCACTGCACG-1	0.725902	PT S3 med.
9_ATTGTTCAGCCTGACC-1	0.778715	PT S3 med.
9_ATTTACCCACACTGGC-1	0.741141	PT S3 med.
9_ATTTCTGCACACACGC-1	0.756234	PT S3 med.
9_ATTTCTGTCTTTGCTA-1	0.749404	PT S3 med.
9_CAAAGAAGTTCGAACT-1	0.744995	PT S3 med.
9_CAACAACAGGCTTAGG-1	0.774476	PT S3 med.
9_CAACAGTAGCGTGAAC-1	0.751673	PT S3 med.
9_CAACGGCGTGGACCTC-1	0.742233	PT S3 med.
9_CAACGGCTCTTCCTAA-1	0.749483	PT S3 med.
9_CAAGAGGCAATTGCCA-1	0.761382	PT S3 med.
9_CAAGGGATCCACCCTA-1	0.753447	PT S3 med.
9_CAATCGAAGATAGGGA-1	0.728805	PT S3 med.
9_CAATGACTCCTTCAGC-1	0.824527	PT S3 med.
9_CACACAAAGACTGAGC-1	0.750107	PT S3 med.
9_CACAGGCTCTGTGTGA-1	0.754944	PT S3 med.
9_CACGGGTCAGAAGTTA-1	0.741028	PT S3 med.
9_CACGTGGGTAACTGCT-1	0.73153	PT S3 med.
9_CACTAAGCACTAGGCC-1	0.767075	PT S3 med.
9_CAGAGCCGTTGCCTAA-1	0.736571	PT S3 med.
9_CAGATACCAATAGGGC-1	0.739362	PT S3 med.
9_CAGATACTCCGAAATC-1	0.747528	PT S3 med.
9_CAGATACTCCTCACCA-1	0.756763	PT S3 med.
9_CAGATTGGTGAATTGA-1	0.734547	PT S3 med.
9_CAGCAATCATTCCTCG-1	0.751078	PT S3 med.
9_CAGGCCACACAAATCC-1	0.75569	PT S3 med.
9_CAGGCCAGTCCACATA-1	0.760833	PT S3 med.
9_CAGGTATGTATTTCCT-1	0.805419	PT S3 med.
9_CAGTGCGAGCCAGAGT-1	0.825519	PT S3 med.
9_CATACCCAGCTGTTAC-1	0.805152	PT S3 med.
9_CATACCCGTGTACGCC-1	0.800262	PT S3 med.
9_CATACTTAGTGGTCAG-1	0.732428	PT S3 med.
9_CATCCCAAGCAACTTC-1	0.735692	PT S3 med.
9_CATCCCAGTTGCTGAT-1	0.750899	PT S3 med.
9_CATCCGTCAAGGTACG-1	0.740001	PT S3 med.
9_CATCCGTGTCATATGC-1	0.758946	PT S3 med.
9_CATCGTCGTACCGTCG-1	0.755349	PT S3 med.
9_CATCGTCTCGGATAAA-1	0.734245	PT S3 med.
9_CATGCCTTCGCTGATA-1	0.749947	PT S3 med.
9_CATTCTAGTGTATTGC-1	0.737663	PT S3 med.
9_CATTCTATCAGGGTAG-1	0.742923	PT S3 med.
9_CATTGCCCACTGCATA-1	0.723957	PT S3 med.
9_CATTGCCCAGAGAATT-1	0.750137	PT S3 med.
9_CCAATGACACTGTCCT-1	0.76509	PT S3 med.
9_CCAATGATCGAATGCT-1	0.75035	PT S3 med.
9_CCAATTTGTTCTTGCC-1	0.734508	PT S3 med.
9_CCACAAATCCGCATAA-1	0.756006	PT S3 med.
9_CCACACTCAGACACCC-1	0.763391	PT S3 med.
9_CCACCATAGGAGGTTC-1	0.706885	PT S3 med.
9_CCACCATCATCGCTGG-1	0.734702	PT S3 med.
9_CCACCATTCCTCAGGG-1	0.734219	PT S3 med.
9_CCACTTGAGTATGATG-1	0.749939	PT S3 med.
9_CCATAAGCAGTCGCAC-1	0.764742	PT S3 med.
9_CCATCACCATCTAGAC-1	0.736225	PT S3 med.
9_CCCAACTCACGTGAGA-1	0.753355	PT S3 med.
9_CCCGGAACACAGAGCA-1	0.732467	PT S3 med.
9_CCCTAACTCGTGGTAT-1	0.745711	PT S3 med.
9_CCCTCTCCAGCAGAAC-1	0.733536	PT S3 med.
9_CCGCAAGCATGGGCAA-1	0.733669	PT S3 med.
9_CCGCAAGGTGAGATAT-1	0.730808	PT S3 med.
9_CCGGACACACCTCTAC-1	0.733951	PT S3 med.
9_CCGGACATCCCATTCG-1	0.727209	PT S3 med.
9_CCGGGTATCTTGGTCC-1	0.731586	PT S3 med.
9_CCTACGTGTGAGTAGC-1	0.747596	PT S3 med.
9_CCTCAACTCTGTCGTC-1	0.756768	PT S3 med.
9_CCTCAGTAGCGAGTCA-1	0.758273	PT S3 med.
9_CCTCATGGTCATTGCA-1	0.728871	PT S3 med.
9_CCTCTAGGTATACGGG-1	0.750246	PT S3 med.
9_CCTGTTGAGAGCGACT-1	0.721245	PT S3 med.
9_CCTTCAGGTCCCGGTA-1	0.726003	PT S3 med.
9_CCTTCAGGTTCACGAT-1	0.734038	PT S3 med.
9_CGAAGGAGTTAACCTG-1	0.74293	PT S3 med.
9_CGAATTGCACTGGACC-1	0.733503	PT S3 med.
9_CGAATTGCAGTGTATC-1	0.734241	PT S3 med.
9_CGACAGCTCGTGCTCT-1	0.737955	PT S3 med.
9_CGAGTGCTCTTGCAGA-1	0.70683	PT S3 med.
9_CGAGTTAGTACGTGAG-1	0.751766	PT S3 med.
9_CGATCGGTCGTAGAGG-1	0.722905	PT S3 med.
9_CGATGCGTCAGGAAAT-1	0.742712	PT S3 med.
9_CGCCAGAGTCAGATTC-1	0.746255	PT S3 med.
9_CGGACACCAAGCCTGC-1	0.745324	PT S3 med.
9_CGGACACCACACAGCC-1	0.79087	PT S3 med.
9_CGGAGAAGTTTGCAGT-1	0.741868	PT S3 med.
9_CGGCAGTAGGGATGTC-1	0.747898	PT S3 med.
9_CGGGCATTCACCTACC-1	0.733293	PT S3 med.
9_CGGGTCAAGATTCGCT-1	0.742451	PT S3 med.
9_CGGTCAGAGTCTGTAC-1	0.738435	PT S3 med.
9_CGTAGTATCTACACTT-1	0.743633	PT S3 med.
9_CGTGAATAGCATACTC-1	0.733148	PT S3 med.
9_CGTGCTTGTCAAGGCA-1	0.689664	PT S3 med.
9_CGTGTCTCATCCGGTG-1	0.803847	PT S3 med.
9_CGTGTCTGTGTACAGG-1	0.726895	PT S3 med.
9_CGTTCTGTCCACAAGT-1	0.723032	PT S3 med.
9_CTAACTTAGGCTAGCA-1	0.743358	PT S3 med.
9_CTACAGAGTAACTGCT-1	0.734144	PT S3 med.
9_CTACCTGCAGTCGGAA-1	0.801011	PT S3 med.
9_CTACTATCACTACTTT-1	0.736293	PT S3 med.
9_CTATCCGTCTTCTAAC-1	0.77502	PT S3 med.
9_CTCAATTTCAATCAGC-1	0.749631	PT S3 med.
9_CTCAGAACAAATCAGA-1	0.76478	PT S3 med.
9_CTCAGTCCAGCAAGAC-1	0.742225	PT S3 med.
9_CTCATCGGTGATTAGA-1	0.746362	PT S3 med.
9_CTCATTAAGTCACAGG-1	0.74907	PT S3 med.
9_CTCCAACAGCATAGGC-1	0.760967	PT S3 med.
9_CTCCAACTCAGCGCGT-1	0.743841	PT S3 med.
9_CTCCACAAGCTTACGT-1	0.732241	PT S3 med.
9_CTCCATGAGGATACGC-1	0.748016	PT S3 med.
9_CTCCGATAGGTCACCC-1	0.730602	PT S3 med.
9_CTCCGATCACGGCGTT-1	0.750822	PT S3 med.
9_CTCCTCCCAGTTGTCA-1	0.738861	PT S3 med.
9_CTCCTTTAGTAAGCAT-1	0.752541	PT S3 med.
[truncated: 19,198 more rows]

## Sheet: Figure 3C
Figure 3C	Normalized expression matrix PT, scaled 0–1
Gene	PT S1	PT S2	PT S3	PT S3 med.	PT prolif	PT Injury m1	PT Injury m2	PT Injury m3	PT Injury m4
Cd44	0.0587676	0.0572204	0.0363586	0.033282	0.231552	0.174819	0.0979422	0.209954	1
Havcr1	0.0278886	0.0518495	0.0838482	0.187913	0.330752	0.50006	0.488195	0.171727	1
Vcam1	0.0868167	0.123221	0.0801749	0.0220178	0.200625	0.166771	0.501824	0.467235	1
Anxa3	0.0225835	0.0213255	0.0155343	0.0170547	0.101783	0.207067	0.0917852	0.133173	1
Cxcl10	0.195513	0.181825	0.0851795	0.0795953	0.511001	0.371122	0.56377	0.95323	1
Nfkb1	0.215811	0.22395	0.177107	0.153079	0.337599	0.36566	0.429655	0.570224	1
Atf3	0.0252201	0.0352157	0.0223752	0.0558941	0.114672	0.370596	0.114506	0.155088	1
Vim	0.357331	0.301119	0.256181	0.284351	0.578164	0.609629	0.585766	0.822459	1
Itgb1	0.307864	0.300709	0.287643	0.277309	0.475511	0.613379	0.57696	0.532717	1
Tnfaip3	0.0990977	0.0800542	0.0581837	0.0747964	0.130365	0.228317	0.171953	0.392637	1
Tpm1	0.291583	0.256342	0.301267	0.512612	0.484132	0.794595	0.453844	0.47832	1
Birc3	0.123384	0.114471	0.0743148	0.0967743	0.221257	0.336714	0.364787	0.645939	1
Rhob	0.080082	0.0836164	0.0936245	0.11268	0.154774	0.524852	0.329643	0.35319	1
Parp14	0.266145	0.23068	0.143881	0.137739	0.42904	0.496669	0.637128	0.775986	1
Cd47	0.323333	0.282327	0.229924	0.183695	0.457077	0.511021	0.525776	0.666755	1
Nfkbia	0.237446	0.198466	0.14292	0.1322	0.297892	0.444874	0.328955	0.67858	1
Icam1	0.146015	0.144651	0.122447	0.104705	0.359602	0.335077	0.343502	0.495692	1
Ptpre	0.201438	0.143986	0.118554	0.0824134	0.197969	0.34223	0.307699	0.493006	1
S100a10	0.292227	0.302578	0.327311	0.329091	0.502477	0.590334	0.660769	0.652679	1
Klf6	0.119752	0.100158	0.0841001	0.0639992	0.167967	0.371206	0.326879	0.44039	1
Relb	0.118065	0.103266	0.0647377	0.0713054	0.297308	0.327663	0.308284	0.56483	1
Ifit2	0.192042	0.183009	0.148964	0.0960325	0.422247	0.499392	0.618621	0.576832	1
Ccl2	0.0406879	0.0231813	0.0322441	0.0480995	0.12285	0.0797498	0.0593341	0.169422	1
Klf7	0.446786	0.403964	0.137724	0.12026	0.24543	0.266834	0.420086	1	0.908751
C3	0.264741	0.147982	0.0798003	0.0996947	0.237007	0.220214	0.273921	1	0.662317
Pros1	0.277177	0.172029	0.0856687	0.0639238	0.38596	0.168293	0.299171	1	0.620842
Sparc	0.374678	0.255563	0.159779	0.25632	0.494265	0.410194	0.374522	1	0.650091
Cd74	0.51028	0.433515	0.401961	0.372261	0.751155	0.81055	0.901657	1	0.904219
Stat1	0.54931	0.425989	0.327922	0.372539	0.747228	0.75465	0.808871	1	0.603498
B2m	0.531413	0.452086	0.449138	0.403392	0.834055	0.828479	0.977407	1	0.950984
Ppp2r2b	0.0795816	0.0400021	0.024172	0.079105	0.132579	0.0562117	0.0561993	1	0.270216
Tspan8	0.656836	0.381938	0.240957	0.260357	0.519886	0.386175	0.352898	1	0.591112
Pros1	0.277177	0.172029	0.0856687	0.0639238	0.38596	0.168293	0.299171	1	0.620842
Map3k1	0.455449	0.438123	0.344686	0.280807	0.496288	0.731532	1	0.92806	0.823898
Map3k13	0.629182	0.729845	0.852858	0.681704	0.717212	0.881649	1	0.861329	0.794487
Kcnh1	0.0577081	0.112491	0.15775	0.713456	0.435791	0.719445	1	0.194611	0.795679
Egfr	0.494463	0.573261	0.655033	0.460984	0.81026	0.789112	1	0.92253	0.977914
Cryab	0.230949	0.232605	0.203781	0.546034	0.487527	1	0.361078	0.445906	0.564713
Myo5b	0.406277	0.498316	0.594092	0.891257	0.925178	1	0.707281	0.45879	0.543523
Cp	0.0650895	0.06555	0.0528671	0.289389	0.310888	1	0.264369	0.487948	0.668155
Serpina10	0.114076	0.128135	0.100754	0.427245	0.689943	1	0.495964	0.34694	0.472617
Jag1	0.147281	0.141306	0.12411	0.197769	0.430361	1	0.189858	0.294331	0.540235
Wnt5a	0.0741891	0.156948	0.313357	0.68139	0.595477	1	0.40341	0.183218	0.398498
Foxc1	0.0358625	0.041071	0.0262978	0.592254	0.385813	1	0.0668765	0.0592156	0.0876019
Abcc1	0.0850449	0.0855331	0.0594949	0.951544	0.752695	1	0.0927047	0.122861	0.352584
Gclc	0.121908	0.173141	0.240665	0.900535	0.568483	1	0.281489	0.178405	0.218109
G6pdx	0.30406	0.253224	0.368765	0.623897	0.687753	1	0.597659	0.48867	0.974755
Acsm3	0.0131745	0.0461223	0.110761	0.327085	0.176464	1	0.0751284	0.0127567	0.0334576
Stk39	0.0881325	0.128153	0.142427	0.354884	0.340354	1	0.309259	0.217134	0.473104
Atad2	0.0248032	0.0206584	0.021966	0.0382342	1	0.0846153	0.0231794	0.0415452	0.0189424
Rad51b	0.0889509	0.0890412	0.0522061	0.0385952	1	0.112402	0.159719	0.250293	0.15668
Pola1	0.0883369	0.0811983	0.0770725	0.0545418	1	0.133445	0.0893702	0.103416	0.112029
Mki67	0.0240711	0.0162887	0.0189654	0.0208705	1	0.052554	0.0341419	0.0559145	0.0442403
Top2a	0.0145876	0.00998021	0.00983096	0.0124075	1	0.0284972	0.0174883	0.0246447	0.0261879
Cyp7b1	0.00603201	0.00729144	0.00775182	1	0.329328	0.46401	0.0205963	0.017905	0.0275421
Nqo1	0.191778	0.190093	0.44179	1	0.517001	0.832445	0.263174	0.185127	0.251334
Egf	0.919719	0.929611	0.693108	1	0.375256	0.296059	0.338115	0.36056	0.277391
Slc7a12	0.00700829	0.00857531	0.0161752	1	0.365113	0.283064	0.025524	0.0100697	0.00544346
Slc7a13	0.0184701	0.127257	1	0.987841	0.391563	0.239511	0.171622	0.012506	0.030337
Slc22a6	0.259185	0.66798	1	0.0767439	0.162516	0.0404553	0.295751	0.0928291	0.0639032
Lrp2	0.69442	0.925548	1	0.90972	0.494834	0.216647	0.338597	0.307235	0.0996314
Slc34a1	1	0.968133	0.915078	0.101695	0.138572	0.024635	0.163504	0.294592	0.0339734
Slc4a4	1	0.89023	0.66033	0.195216	0.340313	0.293182	0.538664	0.794908	0.514906
Slc7a7	1	0.553966	0.237191	0.0812894	0.159284	0.117269	0.288908	0.512685	0.178349
Slc5a2	1	0.463443	0.0530384	0.0234349	0.118942	0.0128282	0.0480913	0.434487	0.0357805

## Sheet: Figure 3D
Figure 3D	PT Celltype proportion per sample
Sample	Celltype	count	total	percent
BALB/c to BALB/c 1	PT_Injury_m1	29	2506	0.0115722
BALB/c to BALB/c 2	PT_Injury_m1	18	2211	0.00814111
BALB/c to C57BL/6 1	PT_Injury_m1	51	1796	0.0283964
BALB/c to C57BL/6 2	PT_Injury_m1	149	4050	0.0367901
C57BL/6 to BALB/c 1	PT_Injury_m1	121	1815	0.0666667
C57BL/6 to BALB/c 2	PT_Injury_m1	95	2102	0.0451951
C57BL/6 to BALB/c 3	PT_Injury_m1	293	3780	0.0775132
C57BL/6 to C57BL/6 1	PT_Injury_m1	11	2935	0.00374787
BALB/c to BALB/c 1	PT_Injury_m2	161	2506	0.0642458
BALB/c to BALB/c 2	PT_Injury_m2	174	2211	0.0786974
BALB/c to C57BL/6 1	PT_Injury_m2	585	1796	0.325724
BALB/c to C57BL/6 2	PT_Injury_m2	1321	4050	0.326173
C57BL/6 to BALB/c 1	PT_Injury_m2	622	1815	0.3427
C57BL/6 to BALB/c 2	PT_Injury_m2	660	2102	0.313987
C57BL/6 to BALB/c 3	PT_Injury_m2	1232	3780	0.325926
C57BL/6 to C57BL/6 1	PT_Injury_m2	40	2935	0.0136286
BALB/c to BALB/c 1	PT_Injury_m3	93	2506	0.0371109
BALB/c to BALB/c 2	PT_Injury_m3	80	2211	0.0361827
BALB/c to C57BL/6 1	PT_Injury_m3	188	1796	0.104677
BALB/c to C57BL/6 2	PT_Injury_m3	393	4050	0.097037
C57BL/6 to BALB/c 1	PT_Injury_m3	211	1815	0.116253
C57BL/6 to BALB/c 2	PT_Injury_m3	291	2102	0.13844
C57BL/6 to BALB/c 3	PT_Injury_m3	459	3780	0.121429
C57BL/6 to C57BL/6 1	PT_Injury_m3	103	2935	0.0350937
BALB/c to BALB/c 1	PT_Injury_m4	51	2506	0.0203512
BALB/c to BALB/c 2	PT_Injury_m4	37	2211	0.0167345
BALB/c to C57BL/6 1	PT_Injury_m4	105	1796	0.0584633
BALB/c to C57BL/6 2	PT_Injury_m4	147	4050	0.0362963
C57BL/6 to BALB/c 1	PT_Injury_m4	130	1815	0.0716253
C57BL/6 to BALB/c 2	PT_Injury_m4	153	2102	0.0727878
C57BL/6 to BALB/c 3	PT_Injury_m4	406	3780	0.107407
C57BL/6 to C57BL/6 1	PT_Injury_m4	16	2935	0.00545145
BALB/c to BALB/c 1	PT_S1	477	2506	0.190343
BALB/c to BALB/c 2	PT_S1	266	2211	0.120308
BALB/c to C57BL/6 1	PT_S1	164	1796	0.091314
BALB/c to C57BL/6 2	PT_S1	315	4050	0.0777778
C57BL/6 to BALB/c 1	PT_S1	195	1815	0.107438
C57BL/6 to BALB/c 2	PT_S1	227	2102	0.107992
C57BL/6 to BALB/c 3	PT_S1	275	3780	0.0727513
C57BL/6 to C57BL/6 1	PT_S1	570	2935	0.194208
BALB/c to BALB/c 1	PT_S2	562	2506	0.224262
BALB/c to BALB/c 2	PT_S2	479	2211	0.216644
BALB/c to C57BL/6 1	PT_S2	163	1796	0.0907572
BALB/c to C57BL/6 2	PT_S2	386	4050	0.0953086
C57BL/6 to BALB/c 1	PT_S2	143	1815	0.0787879
C57BL/6 to BALB/c 2	PT_S2	196	2102	0.0932445
C57BL/6 to BALB/c 3	PT_S2	263	3780	0.0695767
C57BL/6 to C57BL/6 1	PT_S2	654	2935	0.222828
BALB/c to BALB/c 1	PT_S3	804	2506	0.32083
BALB/c to BALB/c 2	PT_S3	770	2211	0.348259
BALB/c to C57BL/6 1	PT_S3	248	1796	0.138085
BALB/c to C57BL/6 2	PT_S3	645	4050	0.159259
C57BL/6 to BALB/c 1	PT_S3	195	1815	0.107438
C57BL/6 to BALB/c 2	PT_S3	260	2102	0.123692
C57BL/6 to BALB/c 3	PT_S3	341	3780	0.0902116
C57BL/6 to C57BL/6 1	PT_S3	917	2935	0.312436
BALB/c to BALB/c 1	PT_S3_medullary	317	2506	0.126496
BALB/c to BALB/c 2	PT_S3_medullary	368	2211	0.166441
BALB/c to C57BL/6 1	PT_S3_medullary	174	1796	0.096882
BALB/c to C57BL/6 2	PT_S3_medullary	426	4050	0.105185
C57BL/6 to BALB/c 1	PT_S3_medullary	123	1815	0.0677686
C57BL/6 to BALB/c 2	PT_S3_medullary	207	2102	0.0984776
C57BL/6 to BALB/c 3	PT_S3_medullary	354	3780	0.0936508
C57BL/6 to C57BL/6 1	PT_S3_medullary	601	2935	0.20477
BALB/c to BALB/c 1	PT_prolif	12	2506	0.00478851
BALB/c to BALB/c 2	PT_prolif	19	2211	0.0085934
BALB/c to C57BL/6 1	PT_prolif	118	1796	0.0657016
BALB/c to C57BL/6 2	PT_prolif	268	4050	0.0661728
C57BL/6 to BALB/c 1	PT_prolif	75	1815	0.0413223
C57BL/6 to BALB/c 2	PT_prolif	13	2102	0.00618459
C57BL/6 to BALB/c 3	PT_prolif	157	3780	0.0415344
C57BL/6 to C57BL/6 1	PT_prolif	23	2935	0.00783646
celltype_level_2_rev	statistic	df	p	p.adj	p.adj.signif	group1	group2	n1	n2
PT_Injury_m1	4.54551	4.46598	0.00806	0.01209	*	allo	syn	5	3
PT_Injury_m2	13.565	2.21805	0.00354	0.007965	**	allo	syn	5	3
PT_Injury_m3	11.087	4.05313	0.00035	0.00105	**	allo	syn	5	3
PT_Injury_m4	4.44373	5.06482	0.00654	0.011772	*	allo	syn	5	3
PT_S1	-3.06098	2.37655	0.0743	0.0743	ns	allo	syn	5	3
PT_S2	-24.9508	5.45711	7.79e-07	7.011e-06	****	allo	syn	5	3
PT_S3	-12.6199	5.65237	2.35e-05	0.00010575	***	allo	syn	5	3
PT_S3_medullary	-3.12856	2.3301	0.0729	0.0743	ns	allo	syn	5	3
PT_prolif	3.36483	4.08941	0.0272	0.0349714	*	allo	syn	5	3

[truncated: 24 more sheets: Figure 3F, Figure 3H, Figure 3I, Figure 4A, Figure 4B, Figure 4C, Figure 4E, Figure 5B top, Figure 5B bottom, Figure 5C top, Figure 5C bottom, Figure 5D top, Figure 5D bottom, Figure 6A, Figure 6B, Figure 6C, Figure 6D, Figure 6E, Figure 6F, Figure 6G …]
