# Supplementary material for: Injured epithelial cell states impact kidney allograft survival after T-cell-mediated rejection
Source: Nat Commun. 2026 Jan 28;17:1060. doi: 10.1038/s41467-026-68397-1 (PMC12852170; doi:10.1038/s41467-026-68397-1)
Supplement: Supplementary file 9 — Source data for supplemental figures [file 41467_2026_68397_MOESM9_ESM.xlsx]

## Sheet: Figure S2
Figure S2
	Serum levels of Urea (mg/dl)
		BALB/c to BALB/c	C57BL/6 to C57BL/6	BALB/c to C57BL/6	C57BL/6 to BALB/c
	M1	39	43	130	310
	M2	42	51	128	261
	M3	46	47	104	201
	M4				264
	The staistical analysis was performed using GraphPad Prism 8.0.1.
	The screen shots below show the details of the analysis.

## Sheet: Figure S3A
Figure S3A
Individual data points are not displayed because of the high data volume and because they can be fully recapitulated from the dataset deposited at GEO (accession GSE284742).

## Sheet: Figure S3B
Figure S3B
BALB/c to BALB/c 1	4329
BALB/c to BALB/c 2	3997
BALB/c to C57BL/6 1	3420
BALB/c to C57BL/6 2	7767
C57BL/6 to BALB/c 1	3172
C57BL/6 to BALB/c 2	3797
C57BL/6 to BALB/c 3	9048
C57BL/6 to C57BL/6 1	4176

## Sheet: Figure S4A
Figure S4A
	Podo	PT	tL	TAL	DCT	CNT	CD-PC	CD-IC-A	CD-IC-B	EC	Leuko	IntC	Uro	PEC	Prolif
Rab3b	1	0.00141057	0.00135635	0.0017289	0.00134084	0.00107945	0.000888976	0.000414312	0.0015221	0.0284165	0.00176446	0.00291423	0.0438422	0.0319771	0.00301069
Wif1	1	0.00368652	0.00306816	0.001415	0.00200167	0.00257272	0.00174949	0.0039706	0.0033533	0.0355463	0.00548579	0.00680898	0.00405447	0.0805247	0.00314142
Wt1	1	0.00250677	0.00474097	0.0021336	0.00115896	0.0011827	0.00312198	0.0020006	0.00204021	0.0247771	0.00475322	0.0159599	0.00193547	0.149992	0.00066351
Aplp1	1	0.00883767	0.0214957	0.0117545	0.0110054	0.0259303	0.017333	0.0191143	0.0869123	0.0650989	0.0224518	0.0273997	0.00959062	0.18993	0.0238022
Clic5	1	0.0712558	0.0272413	0.0129641	0.0119914	0.0134336	0.00963738	0.0142615	0.0203977	0.219014	0.0339387	0.0286336	0.0164786	0.127743	0.0118978
Ptn	1	0.0299418	0.0128394	0.0214664	0.0398362	0.0460028	0.0246586	0.0177059	0.0302656	0.379684	0.092066	0.275953	0.228402	0.0594328	0.288952
Plat	1	0.0220042	0.101732	0.0210964	0.0097555	0.0146859	0.0432123	0.0232128	0.0143607	0.246404	0.0379142	0.11767	0.13549	0.397974	0.0127269
Vamp2	1	0.167017	0.409674	0.367284	0.335584	0.451826	0.312294	0.31862	0.31519	0.306308	0.311135	0.406476	0.362326	0.355964	0.410477
Itga8	1	0.0378923	0.184375	0.1173	0.0381755	0.0290558	0.125005	0.0823181	0.0372617	0.500385	0.0778962	0.469145	0.049145	0.0429687	0.0392928
Podxl	1	0.0209324	0.0353163	0.0285676	0.0158003	0.0225884	0.0312828	0.0280718	0.0361498	0.56918	0.0446236	0.060449	0.010865	0.155953	0.0122418
Slc25a37	1	0.304805	0.33715	0.16264	0.158704	0.198314	0.241102	0.305558	0.188571	0.55128	0.495221	0.307705	0.606207	0.624751	0.279486
Psd3	1	0.0988152	0.236291	0.155643	0.251996	0.288273	0.206173	0.223719	0.333354	0.377193	0.145482	0.586205	0.567992	0.624804	0.350214
Dnajb4	1	0.244349	0.670761	0.420947	0.321636	0.39051	0.479498	0.395479	0.329976	0.408057	0.194146	0.410095	0.359313	0.478629	0.338796
Anxa2	1	0.109442	0.721262	0.249527	0.0572528	0.140169	0.350595	0.200745	0.166294	0.718244	0.549303	0.699743	0.746312	0.678743	0.136186
Nbl1	1	0.0548096	0.766301	0.0885289	0.0697913	0.0434694	0.197797	0.17513	0.037052	0.142236	0.121292	0.375835	0.334303	0.498877	0.0956382
Pnmal2	1	0.0881747	0.805605	0.733123	0.391135	0.289664	0.493356	0.51938	0.19684	0.335974	0.13322	0.452221	0.101067	0.292433	0.315961
Nupr1	1	0.0111872	0.649763	0.10202	0.0149929	0.0299188	0.113991	0.160259	0.0570474	0.157673	0.107937	0.14402	0.815568	0.171199	0.0340498
Ackr3	1	0.519363	0.675779	0.0533175	0.0264673	0.213084	0.321939	0.147392	0.131442	0.183905	0.0987053	0.166972	0.353925	0.828671	0.0370036
B2m	1	0.488107	0.668968	0.599803	0.261758	0.45834	0.5812	0.593299	0.575042	0.873227	0.82824	0.849841	0.666508	0.718011	0.492588
Stat1	1	0.532887	0.534846	0.27511	0.232032	0.382401	0.340791	0.300704	0.344477	0.568401	0.882387	0.556908	0.817777	0.722647	0.490703
Timp3	1	0.89095	0.712491	0.228397	0.160689	0.188595	0.322244	0.206375	0.130579	0.818119	0.21419	0.502264	0.122803	0.714543	0.132717
Fmnl2	1	0.123438	0.409118	0.278659	0.193822	0.19311	0.429103	0.299871	0.196927	0.841497	0.732177	0.903991	0.373681	0.388512	0.377573
Tubb3	1	0.177093	0.812402	0.334174	0.446326	0.783908	0.83946	0.784842	0.4363	0.674141	0.500189	0.534156	0.272051	0.529557	0.913602
Cubn	0.0686615	1	0.0591418	0.0487089	0.0441473	0.0269259	0.0180945	0.0323843	0.0329779	0.11599	0.0276504	0.0593832	0.0082545	0.106203	0.011061
0610005C13Rik	0.0511081	1	0.0443587	0.0922272	0.0648089	0.0558305	0.0219306	0.0517867	0.066458	0.141175	0.0469782	0.0786704	0.015339	0.0687001	0.0113371
Slc5a2	0.102624	1	0.0108256	0.0172282	0.0426592	0.0480694	0.0118796	0.0360869	0.0699516	0.148094	0.0159789	0.0617033	0.00434697	0.134731	0.0123987
Sypl2	0.0610552	1	0.0588747	0.0436479	0.0457398	0.0368218	0.018635	0.0449069	0.0409209	0.145297	0.0366027	0.0765097	0.0105534	0.177003	0.041338
Slc22a8	0.0552502	1	0.0044108	0.0169922	0.0568353	0.0368718	0.0147846	0.0491263	0.0786169	0.194575	0.0251577	0.0699931	0.00472983	0.0365937	0.0117068
Slc7a13	0.0356391	1	0.12934	0.0757975	0.0254119	0.0195554	0.0402354	0.0410941	0.0293273	0.200059	0.0423288	0.105742	0.0282332	0.0673837	0.0273807
Slc22a6	0.0433802	1	0.00833481	0.0230501	0.0644283	0.036788	0.0202178	0.0375122	0.0530267	0.204521	0.0876872	0.0953191	0.00498624	0.0756897	0.027815
Slc3a1	0.0852214	1	0.140503	0.0997242	0.0498868	0.0380773	0.045696	0.0589567	0.0548093	0.206671	0.0859393	0.122236	0.025268	0.180786	0.0256562
Hsd3b4	0.0543397	1	0.121709	0.0583118	0.036065	0.0345865	0.0415465	0.0649788	0.0501707	0.21205	0.0769781	0.137893	0.0125922	0.121997	0.0177885
Dao	0.0879067	1	0.0471362	0.0507822	0.0648048	0.0487957	0.0322652	0.0462613	0.0586892	0.228117	0.105622	0.130857	0.00655632	0.161164	0.0262652
Pck1	0.0891673	1	0.0214961	0.0486234	0.0907829	0.0488164	0.0270138	0.0448633	0.0713074	0.249957	0.0570267	0.100591	0.00828393	0.0459391	0.0141279
Aldob	0.234668	1	0.0994182	0.0657186	0.135412	0.096487	0.0431133	0.0920155	0.122064	0.322226	0.166347	0.205482	0.0224384	0.330637	0.0457071
Lrp2	0.0738085	1	0.0814145	0.0477941	0.0593462	0.0505655	0.0197223	0.0381098	0.042662	0.120432	0.0350455	0.0687191	0.0112966	0.336849	0.0238038
Cyp4b1	0.24103	1	0.0506253	0.0555316	0.0919085	0.0755003	0.0294083	0.0491271	0.0799941	0.342538	0.103881	0.119857	0.0312357	0.214497	0.0343081
Slc27a2	0.0626642	1	0.201841	0.082544	0.0793467	0.0563054	0.0581815	0.0817536	0.0467669	0.212116	0.129091	0.173062	0.0233673	0.354509	0.0658065
Etv1	0.258689	1	0.0247119	0.051281	0.176254	0.14285	0.0311522	0.0384304	0.127429	0.249881	0.110747	0.149492	0.0279692	0.358158	0.0522013
Hmgcs2	0.258138	1	0.0269008	0.0686587	0.148949	0.0988355	0.0492744	0.0897003	0.229498	0.369453	0.0532954	0.366069	0.387104	0.284955	0.0181341
Slc4a4	0.0745586	1	0.0528637	0.0342332	0.058046	0.0418955	0.0468794	0.03528	0.0504695	0.132356	0.085253	0.105837	0.0565121	0.412111	0.0489242
Aadat	0.0410096	1	0.432778	0.110183	0.0304291	0.030089	0.0688514	0.0733098	0.0334735	0.257831	0.109323	0.184452	0.0353898	0.213284	0.0424219
Iyd	0.114922	1	0.0530193	0.0698104	0.452533	0.0762883	0.0345567	0.0669446	0.106247	0.219848	0.0646999	0.131205	0.048516	0.248218	0.0915207
Aqp7	0.0696154	1	0.184622	0.0802448	0.0320004	0.0266736	0.031409	0.0349096	0.0270602	0.187034	0.0964943	0.135036	0.0164802	0.508713	0.0162286
Guca2b	0.0749589	1	0.286257	0.124521	0.0427562	0.0676371	0.0657994	0.208167	0.152173	0.272108	0.138783	0.174225	0.0265334	0.525881	0.0492481
Ndrg1	0.198844	1	0.185839	0.151617	0.214857	0.297514	0.375828	0.129942	0.219225	0.27433	0.169931	0.165292	0.0325566	0.539401	0.141322
Sod3	0.243058	1	0.254941	0.095859	0.0780393	0.0613816	0.0625979	0.0854469	0.0640193	0.404075	0.244754	0.54215	0.0388669	0.409623	0.0547243
Cndp2	0.224115	1	0.250645	0.177499	0.138099	0.137345	0.163246	0.179759	0.19477	0.396893	0.473466	0.328484	0.265744	0.547311	0.244771
Cd36	0.136277	1	0.258483	0.201435	0.0496177	0.0419089	0.110176	0.119761	0.0650756	0.557811	0.267944	0.24194	0.0579975	0.204081	0.0460367
Cdhr5	0.0810609	1	0.298752	0.580689	0.326816	0.286272	0.0674329	0.0809	0.13288	0.20714	0.151014	0.180658	0.0340321	0.568003	0.383182
Nox4	0.112622	1	0.04536	0.0840172	0.0959993	0.0728235	0.0408582	0.0559133	0.0873962	0.161161	0.0770819	0.109522	0.0666211	0.63099	0.096773
Ace2	0.0710525	1	0.100563	0.246757	0.100218	0.0599034	0.0353811	0.0484742	0.0525848	0.201024	0.0900616	0.182454	0.70129	0.456014	0.104125
Selenbp1	0.140343	1	0.324188	0.657525	0.709163	0.336062	0.152769	0.362697	0.328632	0.295267	0.141688	0.23556	0.140665	0.347284	0.35183
Mettl7a2	0.125158	1	0.410877	0.164772	0.105253	0.0985648	0.0742183	0.146406	0.111004	0.242218	0.141038	0.196976	0.133612	0.716115	0.174903
Cldn2	0.129543	1	0.328441	0.0603815	0.0383728	0.0407703	0.0283432	0.0392266	0.0495699	0.16721	0.117246	0.131234	0.0125357	0.734316	0.0502648
Slc7a12	0.053366	1	0.735496	0.217515	0.0215698	0.0275436	0.132059	0.168161	0.0392727	0.307456	0.129048	0.275262	0.0976651	0.199526	0.0613623
Nqo1	0.167821	1	0.484236	0.463809	0.683689	0.41219	0.306341	0.250375	0.186498	0.411032	0.15915	0.262272	0.741125	0.309126	0.549606
Gamt	0.538994	1	0.204349	0.232578	0.137203	0.124887	0.184335	0.16766	0.173264	0.779008	0.328407	0.654062	0.244116	0.242165	0.0503001
Wdr7	0.717289	1	0.692117	0.400962	0.392081	0.482112	0.47794	0.542691	0.528107	0.763048	0.83962	0.675318	0.895691	0.967792	0.479474
Asb9	0.0839821	1	0.194278	0.999523	0.421933	0.227385	0.119459	0.318883	0.250191	0.303568	0.15866	0.195108	0.0213711	0.374131	0.353368
Slc14a2	0.00559971	0.00315963	1	0.0656228	0.00106911	0.000848463	0.0775265	0.0397666	0.00140164	0.12398	0.0269922	0.0584523	0.0650001	0.0074833	0.00491563
Bst1	0.0351987	0.0190116	1	0.0396561	0.00844029	0.0178509	0.0518608	0.0329731	0.0248414	0.136139	0.162911	0.0825263	0.0383113	0.126764	0.0159875
Aqp1	0.0239518	0.248796	1	0.0974976	0.0121423	0.00971842	0.0570159	0.0578618	0.012984	0.217702	0.0310953	0.0841794	0.0353185	0.0358941	0.00632246
Gjb4	0.0592983	0.0119512	1	0.0946029	0.0157736	0.036246	0.253529	0.0515987	0.00694659	0.0502481	0.0348702	0.0719936	0.196663	0.288445	0.0179102
Cryab	0.289743	0.110519	1	0.181239	0.0267381	0.0750909	0.211024	0.342043	0.0485611	0.142652	0.0511362	0.117307	0.115471	0.239053	0.0671088
Bcat1	0.0347466	0.334153	1	0.102888	0.0100409	0.0164855	0.38602	0.079075	0.0153427	0.155183	0.184806	0.203748	0.0935348	0.159929	0.0493156
Slc34a2	0.0155406	0.140004	1	0.261729	0.0188959	0.018646	0.0382182	0.0166457	0.00533085	0.0605511	0.0446594	0.0539709	0.0743745	0.418599	0.0957423
Angpt2	0.201667	0.0140288	1	0.0748668	0.013044	0.0177768	0.0873983	0.0464659	0.0232761	0.495308	0.0919479	0.211362	0.0418333	0.0374956	0.0250574
Hspa1a	0.100407	0.0486263	1	0.518432	0.451307	0.554842	0.658471	0.577754	0.325283	0.161415	0.0620866	0.166621	0.508652	0.130416	0.230698
Serpina10	0.0408185	0.515623	1	0.272228	0.00865252	0.0129246	0.0346227	0.0254167	0.01396	0.138477	0.132484	0.150647	0.0373069	0.659472	0.0462646
Pax8	0.136213	0.231665	1	0.255115	0.0783951	0.138431	0.274277	0.254895	0.131779	0.0829692	0.0646478	0.0647463	0.306077	0.698834	0.170468
Gls	0.223747	0.210722	1	0.790798	0.7853	0.586393	0.408857	0.707944	0.728648	0.354468	0.32772	0.357609	0.310863	0.265999	0.760093
Scin	0.105642	0.15225	1	0.601303	0.103714	0.229292	0.4695	0.12516	0.0936077	0.215947	0.0749631	0.105283	0.166082	0.919296	0.265044
Myc	0.404034	0.335701	1	0.245754	0.0709645	0.147535	0.422451	0.153139	0.139887	0.536714	0.769051	0.562778	0.935172	0.942846	0.212773
Slc12a1	0.0165887	0.0124959	0.0936737	1	0.0417295	0.0147152	0.0761532	0.0667477	0.00944901	0.0750826	0.0272646	0.0597871	0.0193863	0.00884086	0.163699
Cldn16	0.0245695	0.0134635	0.0755422	1	0.0999355	0.0511702	0.0473289	0.098305	0.0385597	0.0615358	0.0413243	0.0657164	0.0169172	0.0125541	0.207947
Cldn10	0.0160622	0.101122	0.244537	1	0.0170644	0.0109394	0.095229	0.0532517	0.0103761	0.101303	0.0374299	0.0697727	0.0302493	0.0233762	0.0728455
Clcnka	0.0098608	0.0134977	0.274704	1	0.296854	0.137106	0.133341	0.259034	0.0810417	0.0797241	0.0241117	0.0506481	0.0257502	0.0140212	0.168887
Gp2	0.0137865	0.0123476	0.252635	1	0.38221	0.0462435	0.0611798	0.0414217	0.051866	0.0418925	0.022479	0.0401675	0.0281851	0.0108223	0.255003
Prox1	0.0110401	0.00682073	0.413591	1	0.146393	0.0192832	0.176403	0.07351	0.0112091	0.150619	0.0193508	0.0703697	0.0330214	0.00608933	0.0908631
Ppp1r1a	0.0133006	0.00919	0.120029	1	0.436688	0.0777371	0.0594684	0.0569875	0.0346459	0.0619922	0.0154488	0.0390128	0.0151858	0.00644019	0.128803
Ppargc1a	0.0420333	0.250251	0.345895	1	0.555267	0.332489	0.260871	0.474434	0.451537	0.0843154	0.047298	0.0698212	0.0951635	0.189903	0.541712
Gpx6	0.0132302	0.0127417	0.0731645	1	0.6367	0.0612857	0.0591686	0.0452028	0.0217141	0.0787022	0.0131338	0.0435942	0.0171768	0.00544281	0.183992
Egf	0.0953907	0.0499255	0.0513037	1	0.703037	0.0418232	0.0484963	0.0641435	0.0466314	0.105513	0.0242877	0.0691422	0.0133721	0.0253209	0.184045
Pou3f3	0.0252705	0.181862	0.755133	1	0.500855	0.278753	0.627617	0.444801	0.262035	0.134373	0.0637534	0.0921975	0.252009	0.12802	0.501676
Slc5a1	0.0408294	0.815288	0.267346	1	0.089049	0.0593502	0.0516288	0.0471747	0.0289033	0.189597	0.106311	0.154786	0.104515	0.37631	0.252651
Prom1	0.0557735	0.233128	0.50289	1	0.513952	0.147908	0.410109	0.111938	0.0518146	0.229617	0.0619468	0.110653	0.304656	0.205872	0.841384
Isca1	0.569929	0.708276	0.600575	1	0.974428	0.529754	0.566117	0.641274	0.652944	0.514469	0.372564	0.431557	0.512406	0.398567	0.719198
Pvalb	0.00730396	0.00834222	0.000944494	0.0169552	1	0.0992328	0.00968875	0.016	0.0199046	0.0183813	0.00366644	0.00965075	0.000478552	0.00249992	0.0615207
Cavin2	0.426655	0.0418019	0.0653438	0.109716	1	0.507329	0.0766885	0.113446	0.198306	0.531772	0.0393923	0.0980005	0.0358072	0.0536058	0.461863
Mapk10	0.0425577	0.0138564	0.0803337	0.384183	1	0.260375	0.18846	0.0515717	0.0393554	0.0411052	0.0249208	0.047323	0.0452347	0.067813	0.611015
Kng2	0.0159278	0.0342172	0.0863613	0.626912	1	0.476112	0.0530608	0.106559	0.154117	0.05825	0.0281681	0.0463746	0.0150124	0.0158201	0.291694
Kcnj1	0.0128716	0.00842311	0.0492532	0.535118	1	0.654837	0.324043	0.138105	0.150159	0.0495422	0.0255663	0.0363884	0.0114128	0.00639735	0.496176
Sfrp1	0.0477388	0.0355146	0.0895619	0.296801	1	0.370685	0.0733969	0.0825018	0.0888404	0.11648	0.131756	0.356024	0.0738983	0.0526661	0.660046
Slc12a3	0.024253	0.0228626	0.00576514	0.0126541	1	0.30705	0.00657004	0.0282867	0.0627507	0.03899	0.0282713	0.0237471	0.00337597	0.0106317	0.671378
Abca13	0.00745346	0.00900803	0.0326149	0.591701	1	0.354439	0.0231455	0.0275231	0.0454701	0.0293557	0.0244349	0.0265974	0.00848238	0.00831909	0.694324
Mgll	0.252595	0.100256	0.103543	0.262395	1	0.40695	0.221052	0.507775	0.23164	0.507237	0.0597861	0.186655	0.0851791	0.0468421	0.705074
Pgam2	0.00983301	0.00718277	0.00129508	0.0115876	1	0.745499	0.0823897	0.0977478	0.262675	0.0213546	0.0111197	0.0123477	0.00246684	0.00457273	0.20878
Ndufs8	0.26723	0.574719	0.366906	0.579197	1	0.694402	0.426716	0.793779	0.720053	0.414809	0.520744	0.421706	0.678264	0.36551	0.702992
Umod	0.122528	0.144962	0.649707	0.822507	1	0.254689	0.401156	0.42414	0.32254	0.360825	0.185635	0.300697	0.182925	0.106033	0.599015
Kcnj16	0.0917584	0.882925	0.311828	0.633018	1	0.83009	0.405565	0.153057	0.198709	0.193524	0.125973	0.131665	0.0917498	0.558708	0.700486
Fech	0.707682	0.892173	0.725809	0.728882	1	0.806917	0.576181	0.811344	0.922687	0.610956	0.395949	0.463174	0.538814	0.746889	0.802688
Ndufa4l2	0.3525	0.694151	0.569941	0.904746	1	0.808622	0.496089	0.946687	0.668442	0.521167	0.318566	0.492803	0.478696	0.436137	0.707373
Tmem147	0.444719	0.486482	0.545728	0.696794	1	0.526155	0.41827	0.547594	0.481717	0.336439	0.291952	0.313502	0.285181	0.473037	0.961538
Fth1	0.657666	0.962931	0.663137	0.816731	1	0.663054	0.463512	0.560075	0.488193	0.67983	0.746826	0.720833	0.558821	0.824527	0.843799
Kl	0.0426666	0.240788	0.0259952	0.185846	0.65165	1	0.201759	0.173279	0.383631	0.0735433	0.0276863	0.0403096	0.00567544	0.0833303	0.20875
Ltc4s	0.0532806	0.00729786	0.00589578	0.015055	0.686002	1	0.0616195	0.0811052	0.206013	0.13161	0.0528957	0.0625084	0.0076884	0.00969329	0.453771
Cav1	0.318544	0.0392153	0.0906956	0.0614705	0.0974943	1	0.725186	0.423515	0.727701	0.776165	0.121291	0.1768	0.374846	0.136311	0.274344
Calb1	0.0349996	0.0327065	0.00742834	0.0331688	0.781121	1	0.416206	0.327576	0.737902	0.0662226	0.0437698	0.0437459	0.00948848	0.0184357	0.36413
Ldhb	0.0974589	0.477695	0.20759	0.791185	0.747749	1	0.554679	0.795359	0.835976	0.19252	0.116886	0.129757	0.0982899	0.413749	0.655106
Rasd1	0.11569	0.0265455	0.399711	0.63903	0.273978	1	0.891147	0.747644	0.656383	0.325424	0.093035	0.16092	0.0898799	0.0509783	0.695353
Cdh16	0.0738975	0.316494	0.430203	0.660945	0.898911	1	0.880043	0.765278	0.665085	0.132845	0.0675938	0.0863183	0.105879	0.225602	0.673624
Scnn1g	0.00764753	0.0082207	0.0200977	0.0112901	0.0234868	1	0.953745	0.305202	0.388955	0.0253539	0.0222851	0.0173876	0.137525	0.00692986	0.0473176
Scg5	0.0662949	0.0126217	0.0837884	0.135349	0.636176	1	0.963092	0.376607	0.809826	0.0484548	0.0387842	0.0384395	0.0117101	0.0536992	0.196655
Aif1l	0.81402	0.124026	0.820378	0.822566	0.629387	1	0.812173	0.819903	0.974637	0.166402	0.0666133	0.0779344	0.101858	0.20996	0.389608
Aqp4	0.00266171	0.0197832	0.0842745	0.0261339	0.00111903	0.00646668	1	0.169105	0.0126653	0.0312925	0.00748511	0.0148825	0.097943	0.00415779	0.00267084
Fxyd4	0.00312194	0.0112868	0.0516208	0.0221689	0.00246464	0.169578	1	0.321246	0.108096	0.0219757	0.00989668	0.0128074	0.126778	0.00660278	0.00423698
Aqp2	0.00720486	0.00794405	0.090822	0.0496979	0.00581464	0.372054	1	0.520727	0.258467	0.0452966	0.0230611	0.0293778	0.022957	0.00818714	0.0111183
Hsd11b2	0.00757714	0.00695363	0.0159161	0.0256723	0.0264752	0.60421	1	0.355695	0.32559	0.0297248	0.0180515	0.0197026	0.00452703	0.00713881	0.0746621
Aqp3	0.00855597	0.0189927	0.0400925	0.0367276	0.00709477	0.404064	1	0.655511	0.555614	0.0359284	0.0185023	0.0234242	0.408151	0.0044154	0.00583963
Muc1	0.0175243	0.00882929	0.437561	0.502123	0.101564	0.166831	1	0.772122	0.372278	0.0807128	0.0366461	0.0662183	0.452633	0.0164809	0.241795
Lcn2	0.045936	0.029366	0.841954	0.401322	0.31318	0.271784	1	0.426414	0.132537	0.178532	0.130793	0.13677	0.446822	0.14645	0.652233
Slc2a1	0.157919	0.0863316	0.903081	0.684395	0.174895	0.344329	1	0.639553	0.305186	0.33207	0.316455	0.275839	0.34773	0.251917	0.27377
Epcam	0.0338807	0.0502901	0.997167	0.674726	0.383671	0.490905	1	0.799077	0.580129	0.152129	0.0678744	0.096283	0.960777	0.169649	0.631874
Slc4a1	0.00193022	0.00167249	0.00759536	0.00847274	0.00737658	0.0438403	0.0944432	1	0.0374822	0.00779463	0.0027218	0.00476931	0.00180597	0.00140328	0.00419026
Slc26a7	0.170861	0.00153554	0.0237991	0.0304217	0.0070502	0.00338158	0.100546	1	0.00366266	0.0101914	0.00241045	0.00564515	0.00361725	0.0130421	0.0123197
Actn3	0.0178118	0.00565378	0.0229956	0.0182415	0.00640831	0.0212131	0.110451	1	0.17642	0.0199794	0.0185382	0.0490075	0.0290981	0.0175618	0.0110921
Rhcg	0.00803748	0.00522925	0.00933453	0.0155168	0.225436	0.477176	0.520109	1	0.688358	0.0202945	0.0119786	0.00996882	0.00323885	0.00309098	0.0797295
Foxi1	0.00798164	0.00326114	0.00921081	0.00744737	0.0126021	0.135139	0.138522	1	0.815454	0.0120046	0.00618147	0.00654355	0.00398125	0.00187825	0.00407858
Car2	0.0561243	0.357548	0.156693	0.312832	0.038995	0.247691	0.544969	1	0.823268	0.141294	0.0771896	0.0915003	0.0672364	0.265384	0.0682027
Prx	0.16292	0.168889	0.0925533	0.605572	0.0317155	0.260728	0.396563	1	0.886714	0.122311	0.0349691	0.0557453	0.0463597	0.170555	0.0797555
Met	0.138273	0.323271	0.909814	0.673091	0.377016	0.294397	0.514218	1	0.665686	0.164197	0.0920772	0.0965249	0.506466	0.714966	0.589147
Prss23	0.480809	0.293241	0.592344	0.987145	0.484438	0.457393	0.552933	1	0.476847	0.590779	0.329847	0.868312	0.0994055	0.93687	0.260412
Slc26a4	0.00413015	0.00320231	0.000309788	0.00104135	0.00814793	0.111915	0.0412961	0.0216991	1	0.00627067	0.00440709	0.00374959	0.000697516	0.00201246	0.00351913
Slc4a9	0.00335671	0.00215868	0.00223035	0.00780007	0.0173816	0.128069	0.0498263	0.503249	1	0.00606258	0.00480859	0.00422413	0.00223803	0.00214441	0.016826
Emb	0.0526879	0.0248062	0.203358	0.508991	0.325906	0.213138	0.105518	0.252037	1	0.0956814	0.313032	0.135728	0.339522	0.0432722	0.544436
Clcn5	0.0757156	0.288184	0.136984	0.206253	0.164627	0.180809	0.10484	0.665821	1	0.0815244	0.0679931	0.0798814	0.117174	0.121262	0.0811221
Tmem213	0.0178757	0.0163133	0.0587296	0.174151	0.606678	0.515334	0.298765	0.772098	1	0.0503106	0.0322148	0.0354031	0.0110813	0.0154705	0.28749
Atp6v0d2	0.0050431	0.00342864	0.0110234	0.0196069	0.0265489	0.151625	0.087397	0.796541	1	0.0117001	0.00799641	0.00838652	0.00440531	0.00382152	0.0116304
Wdr72	0.0264103	0.216479	0.128806	0.520972	0.391492	0.509169	0.302316	0.866903	1	0.0616041	0.0407274	0.0471518	0.082411	0.08652	0.405922
Dmxl2	0.545467	0.611384	0.908806	0.431516	0.247933	0.276997	0.22938	0.47289	1	0.335216	0.321263	0.290328	0.165591	0.807256	0.21005
Atp6v1b1	0.0115136	0.00756226	0.00656589	0.115102	0.403541	0.409674	0.190781	0.955812	1	0.0244342	0.0151438	0.0160765	0.00434168	0.00446218	0.230378
Atp6v0a4	0.0274239	0.337548	0.0818688	0.305214	0.375385	0.4195	0.19066	0.963559	1	0.0782122	0.0463793	0.0544179	0.0128854	0.0748384	0.286239
Tfcp2l1	0.0564876	0.127881	0.146344	0.543202	0.590965	0.800235	0.705747	0.981056	1	0.080065	0.0581657	0.0607242	0.0551793	0.22721	0.775805
Clcnkb	0.0140094	0.0119503	0.00651801	0.21582	0.997297	0.766807	0.129153	0.863336	1	0.0323523	0.0237145	0.0244426	0.00437167	0.00728671	0.341878
Sox17	0.114593	0.01291	0.031645	0.042215	0.0167925	0.00779381	0.0225685	0.014815	0.00814581	1	0.0136696	0.0764067	0.026098	0.009255	0.0110355
Gpihbp1	0.151464	0.0343199	0.0703552	0.0825104	0.0390721	0.0251712	0.0513949	0.0373401	0.0254693	1	0.0715992	0.0941992	0.0206004	0.0222081	0.0231123
Plvap	0.0866585	0.0375886	0.181861	0.0630183	0.0313311	0.0559564	0.11789	0.0959164	0.0749213	1	0.115524	0.161813	0.0322972	0.0293266	0.0222371
Rsad2	0.151371	0.0582219	0.114962	0.0731618	0.0596212	0.106502	0.0815478	0.0993387	0.200809	1	0.107388	0.0939688	0.0781768	0.159179	0.0876498
Tie1	0.201008	0.0235674	0.0818071	0.0498912	0.0253132	0.0322569	0.0641313	0.043493	0.0402167	1	0.0618329	0.0920404	0.0195149	0.0187755	0.0144221
Pecam1	0.232437	0.0246395	0.0975841	0.0498156	0.023168	0.0347315	0.0623788	0.0397865	0.0397644	1	0.101155	0.0863918	0.029168	0.0285594	0.0232843
Cdh5	0.253918	0.019945	0.104139	0.0475196	0.0156404	0.0273414	0.0559161	0.0367686	0.0350963	1	0.0639955	0.0726709	0.0246769	0.0231021	0.0126667
Calcrl	0.294786	0.0283353	0.202114	0.0925276	0.0246516	0.0402252	0.143601	0.0979411	0.0529186	1	0.109364	0.31392	0.0643855	0.0346984	0.0195307
Eng	0.320426	0.0390784	0.138562	0.090227	0.0414655	0.052002	0.114918	0.0736248	0.0675479	1	0.155882	0.40229	0.0490245	0.040456	0.0371435
Ctla2a	0.421332	0.0385517	0.210836	0.0949816	0.0412111	0.0571864	0.112114	0.06869	0.0616334	1	0.242487	0.20302	0.0829544	0.0577134	0.0970308
AU021092	0.242457	0.0223917	0.246541	0.04837	0.0211317	0.0320704	0.450557	0.186954	0.0413347	1	0.064362	0.0802799	0.0917336	0.0191051	0.0105787
Clec14a	0.465593	0.0333818	0.155333	0.0822961	0.0375197	0.0428864	0.0930215	0.0575093	0.0469518	1	0.0559473	0.208752	0.0275358	0.0307999	0.0104829
Gng11	0.275636	0.0947836	0.183658	0.114705	0.0482244	0.0804379	0.127994	0.136972	0.178759	1	0.206259	0.484332	0.0975944	0.132548	0.0440304
Kdr	0.581844	0.0404631	0.0388991	0.0379635	0.0368909	0.0452397	0.0423678	0.0421489	0.0464576	1	0.0525595	0.0689857	0.015472	0.0374382	0.00834502
Pmp22	0.458132	0.056727	0.282451	0.134145	0.0402646	0.0711352	0.169529	0.135803	0.548396	1	0.197937	0.608294	0.164975	0.316856	0.0444295
Fscn1	0.21983	0.0586997	0.177913	0.105626	0.0559681	0.0890288	0.121051	0.103838	0.120527	1	0.481951	0.658043	0.552484	0.12701	0.0782788
Pi16	0.893007	0.0141491	0.013152	0.00983657	0.0212771	0.0208877	0.0116869	0.012421	0.02665	1	0.166772	0.412864	0.0200171	0.0970842	0.0123255
Ehd3	0.993469	0.0575927	0.119167	0.075412	0.0541103	0.0591621	0.113296	0.102057	0.0879597	1	0.226017	0.282646	0.0634247	0.122317	0.0574043
Cybb	0.0859579	0.0577574	0.0672728	0.0718046	0.0542591	0.0925351	0.0800696	0.0910564	0.138593	0.182885	1	0.185777	0.128976	0.0887375	0.101602
Lst1	0.168685	0.067785	0.0944653	0.0523608	0.0652487	0.125277	0.104833	0.114322	0.162819	0.253368	1	0.272934	0.114517	0.176775	0.130503
Ms4a6c	0.113384	0.0440413	0.0741314	0.0625031	0.0436013	0.0740106	0.0756388	0.0739513	0.10574	0.175486	1	0.282077	0.0736743	0.0722924	0.0635019
Ms4a6b	0.0928928	0.0369896	0.0719422	0.0633568	0.0512387	0.085908	0.0941303	0.0830287	0.106437	0.146461	1	0.304284	0.158066	0.081114	0.154928
Laptm5	0.138418	0.0614324	0.099232	0.0720454	0.0614631	0.109347	0.114245	0.0922797	0.133012	0.212282	1	0.318966	0.170408	0.105674	0.119837
Itgax	0.178181	0.0532643	0.0384764	0.0300906	0.0562097	0.0930484	0.0797583	0.0541613	0.132273	0.163518	1	0.284755	0.322037	0.0993947	0.152731
Ptprc	0.12653	0.0428438	0.0654344	0.0609496	0.0651789	0.106886	0.118086	0.0868329	0.131029	0.149404	1	0.333392	0.21239	0.0727854	0.194833
Cd300lf	0.100881	0.0346132	0.0432624	0.0378673	0.0534648	0.102995	0.0774422	0.0600213	0.13	0.127163	1	0.253756	0.0854434	0.0904456	0.0909261
Clec4a3	0.130544	0.0612226	0.0764165	0.0604921	0.0726112	0.121498	0.103583	0.103918	0.146429	0.218718	1	0.352647	0.0759108	0.101988	0.12968
Adgre1	0.0838249	0.0565434	0.121285	0.113352	0.0589974	0.0957205	0.12204	0.116568	0.145971	0.222505	1	0.364015	0.0790069	0.140594	0.067387
Dnase1l3	0.212081	0.0683957	0.0458908	0.0478723	0.0821662	0.174732	0.201724	0.141109	0.21036	0.222306	1	0.3917	0.15652	0.145257	0.156111
Csf1r	0.159293	0.147936	0.280209	0.126703	0.0752681	0.113568	0.151521	0.144031	0.15236	0.241048	1	0.392089	0.156986	0.27198	0.0931302
Csf3r	0.113292	0.0470525	0.0881818	0.0646775	0.0566499	0.103267	0.0996389	0.083217	0.121229	0.190343	1	0.307927	0.109756	0.0840254	0.108553
C5ar1	0.178806	0.0558965	0.192581	0.1223	0.0457742	0.0712249	0.155758	0.150103	0.103538	0.25616	1	0.404866	0.125141	0.151376	0.0883368
Plbd1	0.114734	0.0797701	0.0470439	0.063376	0.0717854	0.100196	0.0786356	0.0980791	0.153615	0.197992	1	0.40654	0.0725939	0.135241	0.123067
Alox5ap	0.201461	0.0497761	0.126519	0.10526	0.0834023	0.12392	0.136098	0.10726	0.134708	0.259758	1	0.420603	0.0839286	0.116749	0.147294
Ccl12	0.0933278	0.0603843	0.134243	0.10099	0.0531027	0.0784846	0.108448	0.104047	0.130025	0.215928	1	0.378349	0.0691846	0.142266	0.145532
F13a1	0.214787	0.0448475	0.308842	0.164033	0.0607294	0.0950099	0.17393	0.12598	0.0939352	0.266165	1	0.365717	0.104682	0.0612213	0.23594
Ncf4	0.14933	0.0692722	0.108644	0.0700802	0.0958178	0.15985	0.121194	0.118381	0.167999	0.232914	1	0.462509	0.214481	0.147476	0.250306
Mpeg1	0.195604	0.107062	0.147535	0.187441	0.14486	0.160448	0.171739	0.144049	0.189009	0.237974	1	0.468111	0.274378	0.207939	0.290787
Ifng	0.260829	0.0507672	0.0505096	0.0542587	0.0516605	0.0947249	0.0822784	0.0755314	0.108084	0.178822	1	0.472018	0.351427	0.149179	0.272922
Ms4a7	0.12041	0.0639415	0.19405	0.12435	0.0650028	0.110987	0.178611	0.145866	0.130699	0.254153	1	0.482001	0.291842	0.151382	0.164614
Ctla4	0.108695	0.0369865	0.066978	0.0559097	0.0506856	0.0772763	0.102952	0.0655534	0.0967891	0.132131	1	0.483035	0.239169	0.0651895	0.117959
Klrk1	0.14951	0.0686322	0.0900303	0.0829013	0.0878512	0.160369	0.120364	0.0938022	0.174108	0.19478	1	0.349288	0.287759	0.145099	0.34097
Cd3d	0.108142	0.0417888	0.0682997	0.0645526	0.0630169	0.0959256	0.100096	0.071259	0.10868	0.144031	1	0.488063	0.304404	0.0903832	0.278601
Rac2	0.160552	0.0550865	0.0966958	0.0739276	0.064892	0.120834	0.138428	0.0995757	0.144832	0.193729	1	0.490501	0.237722	0.119375	0.226812
Cd4	0.100993	0.0369671	0.0489504	0.0310368	0.0403602	0.0718184	0.068628	0.0535523	0.0945698	0.134079	1	0.491197	0.166243	0.0780828	0.0673067
Klrc1	0.121033	0.0471878	0.088718	0.0465745	0.0679752	0.134789	0.128074	0.0743743	0.120614	0.15245	1	0.495068	0.446051	0.110956	0.303876
Lag3	0.0928775	0.0330705	0.0448075	0.0473117	0.0407964	0.079721	0.0840747	0.0571818	0.0979562	0.112335	1	0.498732	0.33199	0.0769051	0.187612
Ctss	0.17444	0.103551	0.158806	0.135331	0.114567	0.183815	0.213068	0.149312	0.181713	0.297274	1	0.505355	0.275885	0.195404	0.200774
Ccl9	0.169489	0.0723124	0.252541	0.131964	0.0732063	0.115171	0.184216	0.143797	0.152856	0.285345	1	0.505605	0.105594	0.268367	0.114479
Il2ra	0.283955	0.0374881	0.0927988	0.0597879	0.0566056	0.0929578	0.109989	0.0973224	0.115959	0.168784	1	0.547709	0.22709	0.134136	0.271608
Epsti1	0.111895	0.0923762	0.155063	0.22555	0.104598	0.15934	0.436036	0.232883	0.185977	0.241744	1	0.4409	0.572536	0.146271	0.265505
Gzmb	0.222847	0.0775962	0.215845	0.105906	0.114049	0.196971	0.224727	0.1213	0.139829	0.243142	1	0.561398	0.598035	0.232822	0.439277
Cd8a	0.108207	0.0402074	0.0609616	0.0624524	0.0920341	0.151312	0.155669	0.0940312	0.143447	0.129826	1	0.599481	0.298424	0.120202	0.445452
S100a4	0.240995	0.0630508	0.301095	0.218955	0.108685	0.16764	0.262819	0.191302	0.197359	0.398411	1	0.562589	0.506309	0.143082	0.447375
Cd3e	0.112719	0.0523312	0.0780411	0.0823084	0.0899627	0.125094	0.130149	0.088177	0.127464	0.149936	1	0.630568	0.256075	0.118002	0.330485
Gatm	0.238713	0.641823	0.0757605	0.0599164	0.153904	0.18671	0.0908238	0.158626	0.214369	0.345745	1	0.362838	0.21994	0.232537	0.113417
Snap23	0.79802	0.649984	0.536438	0.555734	0.432484	0.424239	0.492011	0.522609	0.649008	0.812128	1	0.986848	0.557309	0.683171	0.425326
Tagln	0.249678	0.0349541	0.138317	0.116937	0.0265233	0.0392827	0.0832381	0.0700394	0.0664181	0.231939	0.266035	1	0.159904	0.162269	0.0675137
Mfap4	0.0460551	0.0219273	0.0215604	0.0367347	0.0179098	0.0239876	0.028516	0.031595	0.041691	0.0815337	0.267665	1	0.127257	0.0868946	0.0272506
Lum	0.0355493	0.025847	0.0727317	0.077105	0.0245885	0.0344931	0.0543734	0.0454569	0.0440502	0.128094	0.303017	1	0.153525	0.056517	0.0188275
Ccdc80	0.310153	0.0271559	0.13044	0.116243	0.0302387	0.0425528	0.0728604	0.0795507	0.0588889	0.221953	0.275707	1	0.0930314	0.23004	0.0682465
Cfh	0.156414	0.0963468	0.342113	0.227478	0.082663	0.102483	0.211865	0.222343	0.162774	0.369877	0.234126	1	0.118835	0.0999196	0.0642493
Fxyd1	0.404113	0.0495131	0.0990452	0.104382	0.0604691	0.0676231	0.100153	0.076731	0.0696613	0.270473	0.237659	1	0.0760148	0.208669	0.0290296
Dpt	0.0837	0.0563205	0.310618	0.202958	0.0413423	0.0578794	0.194176	0.145257	0.0724764	0.2453	0.406214	1	0.149224	0.121533	0.0738571
Myh11	0.113979	0.0171922	0.071165	0.0628255	0.0197553	0.0333253	0.0346109	0.022079	0.0462746	0.40629	0.0941746	1	0.312916	0.0362562	0.0278205
Igfbp6	0.216786	0.0356377	0.0445803	0.0433233	0.0403126	0.048814	0.0409119	0.0413477	0.0533486	0.102422	0.424761	1	0.0563281	0.241294	0.0709072
Serpina3n	0.068446	0.024881	0.182758	0.153195	0.144364	0.074238	0.048841	0.0559617	0.075278	0.176005	0.442249	1	0.153675	0.0920337	0.0728303
Serpina1a	0.236627	0.162306	0.45677	0.260056	0.0746826	0.0741955	0.239181	0.149138	0.138757	0.443607	0.459943	1	0.0560314	0.20047	0.100998
Bgn	0.331706	0.0989426	0.270196	0.203736	0.0715697	0.0790156	0.171312	0.136835	0.125481	0.461009	0.405963	1	0.102962	0.209632	0.0700042
Fbln5	0.128171	0.116907	0.110142	0.141429	0.154144	0.125938	0.119837	0.145045	0.167626	0.504421	0.173672	1	0.0407695	0.0744111	0.0356088
Rgs5	0.307045	0.0597032	0.109239	0.13335	0.051922	0.0603797	0.054871	0.0733666	0.0855876	0.510473	0.344726	1	0.169729	0.196495	0.0588723
Rbp1	0.238111	0.176178	0.101549	0.111754	0.0832884	0.0932536	0.0750781	0.0964748	0.124368	0.337917	0.493003	1	0.201516	0.567701	0.114908
Myl9	0.506172	0.0534134	0.322921	0.246968	0.0602943	0.0582599	0.190609	0.160883	0.0853649	0.569636	0.163366	1	0.157545	0.0826201	0.0302793
Col1a2	0.40765	0.152165	0.189409	0.163327	0.0975203	0.125912	0.157819	0.146579	0.141274	0.313858	0.592054	1	0.166506	0.266679	0.15882
Gm13889	0.583571	0.0536902	0.176608	0.125776	0.0493031	0.0643553	0.118738	0.0963363	0.0622643	0.615636	0.159344	1	0.0881692	0.095736	0.0705926
Pkd1	0.643902	0.158854	0.339357	0.168278	0.172113	0.187122	0.2485	0.214105	0.16807	0.639122	0.428334	1	0.443034	0.339945	0.271058
Mustn1	0.720391	0.0228981	0.0367833	0.0456376	0.048416	0.0741943	0.040443	0.050583	0.0695501	0.488601	0.131246	1	0.0781077	0.21705	0.0631033
Mylk	0.792274	0.196206	0.252039	0.213943	0.0572636	0.0624127	0.181678	0.113379	0.0818105	0.442129	0.214271	1	0.186681	0.484499	0.0738196
Acta2	0.497318	0.141169	0.341618	0.277758	0.135425	0.225559	0.295101	0.228204	0.224264	0.499987	0.797446	1	0.472076	0.258106	0.394847
Des	0.832338	0.0934572	0.238532	0.134758	0.0589146	0.0751825	0.146206	0.105485	0.112242	0.594733	0.459706	1	0.13755	0.176166	0.0737842
Actn1	0.709144	0.160529	0.336499	0.119326	0.173878	0.238422	0.44112	0.312489	0.266918	0.374486	0.462029	1	0.364707	0.86227	0.294262
Vim	0.958966	0.146765	0.237693	0.163479	0.0973897	0.157407	0.162093	0.136197	0.165368	0.722587	0.852267	1	0.238052	0.655276	0.240434
Reg3g	0.000634697	0.000403698	0.00133696	0.000445907	0.000369625	0.000378588	0.000724233	0.000284362	0.000576034	0.000913589	0.00200656	0.00203503	1	0.000480125	0
Krt13	0.000836338	0.000491111	0.00112892	0.00051583	0.000782995	0.000513396	0.000773343	0.000723516	0.000368541	0.000960887	0.00182496	0.0024915	1	0.000789881	0.00183273
Serpinb5	0.000586539	0.00039439	0.00243262	0.000866547	0.000357992	0.000322748	0.00180141	0.000635209	0.000169275	0.00154071	0.00199189	0.0028555	1	0.000525951	0.0023718
Upk3a	0.000132063	0.000238286	0.00366714	0.000572304	0.000227666	0.000319436	0.00113389	0.000163145	0.000246837	0.00125155	0.000601081	0.00150515	1	0.000191244	0
Upk1b	0.00495201	0.000379076	0.00254998	0.000864507	0.000255948	0.000189162	0.00122429	0.000755887	7.82422e-05	0.00132143	0.00131723	0.0017191	1	0.00848008	0
Upk1a	0.00404734	0.00200226	0.0058472	0.00909933	0.00673377	0.00638808	0.00688225	0.00691624	0.00390681	0.00409609	0.00499918	0.00524611	1	0.00373989	0.0078323
Anxa8	0.00128564	0.000677292	0.00703073	0.000851979	0.000716319	0.000983545	0.00260697	0.00118985	0.000605069	0.00358173	0.00613744	0.00929031	1	0.00596228	0.00480237
Fxyd3	0.000482432	0.000106481	0.00164686	0.000556921	0.000243489	0.000398023	0.00180455	0.00940846	0.00047245	0.00107822	0.00130303	0.0021086	1	0.000313391	0.00183974
Gpa33	0.00263919	0.00150853	0.00186037	0.00330371	0.00414768	0.0079863	0.00474819	0.00258099	0.00690529	0.00378239	0.00417293	0.00461045	1	0.00301418	0.00409266
Trim29	0.000852242	0.000616629	0.0162226	0.00153305	0.000663576	0.000540276	0.00357577	0.00385165	0.00272955	0.00275975	0.0021875	0.00369834	1	0.0019535	0.00359247
Ivl	0.00123669	0.000336094	0.00160644	0.00114931	0.00728805	0.0114244	0.00216423	0.00126719	0.00240522	0.00106377	0.0019317	0.00189664	1	0.00141568	0.0174588
Gpx2	0.0109709	0.00510274	0.0235641	0.00795708	0.006335	0.0140564	0.019026	0.0330613	0.0131614	0.029752	0.0339013	0.0258465	1	0.0145608	0.00197235
Gabrp	0.00170912	0.000661463	0.0167301	0.0145638	0.00418733	0.0253906	0.00956092	0.0124302	0.00901718	0.00338831	0.0026897	0.00327133	1	0.00153897	0.0211008
Oit1	0.000677341	0.000495832	0.0344895	0.0075498	0.00676556	0.0333934	0.0491075	0.0113018	0.0202682	0.0027181	0.00270861	0.00258764	1	0.00207002	0.0305804
S100a14	0.00324576	0.00137962	0.0219104	0.00565244	0.0136316	0.0169098	0.050878	0.0161187	0.00812356	0.00876057	0.00504973	0.00697375	1	0.00232808	0.010332
Fmo5	0.0281825	0.067916	0.0208651	0.0121067	0.0102787	0.00959447	0.0153668	0.0164572	0.0189872	0.033773	0.0179441	0.0269942	1	0.0255221	0.00893988
Krt19	0.000977217	0.000424945	0.0208499	0.00364897	0.00118704	0.0364622	0.0998794	0.0255218	0.0239738	0.00454155	0.00349569	0.0049667	1	0.0023134	0.00526247
Col17a1	0.0137242	0.0331153	0.0118717	0.0026101	0.00560063	0.00445892	0.00224467	0.00273096	0.00315993	0.00682636	0.0106392	0.00908653	1	0.112649	0.0136288
Sftpd	0.00130782	0.00145443	0.00829009	0.0031779	0.0107819	0.159947	0.153717	0.0350156	0.05824	0.00456007	0.00673904	0.00377063	1	0.00141996	0.0395578
Sdc1	0.0651677	0.0196791	0.0840143	0.201921	0.0519302	0.140943	0.138771	0.188161	0.156712	0.0610222	0.0801067	0.209208	1	0.072926	0.210081
Cldn4	0.0048796	0.00913129	0.226153	0.0211985	0.062726	0.333594	0.233974	0.237115	0.279785	0.0207503	0.0179727	0.0153582	1	0.0956888	0.0781263
Krt8	0.0219999	0.107737	0.198568	0.141418	0.132296	0.32272	0.359291	0.172792	0.152997	0.0437595	0.0359776	0.0309125	1	0.266191	0.245466
Tspan8	0.0462068	0.016125	0.29168	0.376706	0.153366	0.242068	0.17233	0.107884	0.164126	0.1139	0.0285426	0.0464796	1	0.101611	0.208448
Slc14a1	0.0263239	0.00816812	0.106459	0.0425572	0.00831798	0.0108814	0.0278723	0.0184901	0.0126321	0.409456	0.106327	0.100966	1	0.0118451	0.0202801
Ctse	0.0402037	0.0154174	0.0406086	0.0311114	0.028683	0.0534303	0.0968391	0.411242	0.0843517	0.0695325	0.405071	0.194819	1	0.0356195	0.112221
F3	0.304887	0.212913	0.520215	0.0994126	0.0320833	0.0914444	0.200793	0.24008	0.0843755	0.0874757	0.0884693	0.261656	1	0.40753	0.0886999
Sbsn	0.245628	0.06855	0.540308	0.108926	0.15888	0.141791	0.121415	0.156896	0.149621	0.0837935	0.0584373	0.0887804	1	0.182565	0.111301
Cd14	0.117538	0.118656	0.496643	0.154526	0.0274554	0.0388677	0.202728	0.0514947	0.0341482	0.137315	0.128064	0.0931465	1	0.545646	0.0755197
Satb1	0.29847	0.0362259	0.10523	0.0683664	0.0682939	0.0807242	0.150994	0.0828455	0.32786	0.215448	0.612601	0.387129	1	0.117649	0.189903
Omp	0.0694839	0.0316523	0.371686	0.3086	0.332725	0.363554	0.422541	0.307809	0.256822	0.175085	0.0619218	0.110892	1	0.114215	0.638023
Bmp2	0.33981	0.0314066	0.0982929	0.0682151	0.0575685	0.143943	0.0944527	0.0867949	0.0759563	0.66201	0.136338	0.342299	1	0.12784	0.104171
Lgals3	0.109128	0.0890679	0.601838	0.388043	0.214388	0.56864	0.684285	0.363778	0.433041	0.200962	0.537964	0.232808	1	0.310722	0.401105
Pglyrp1	0.173616	0.0425995	0.109009	0.0668906	0.0549988	0.114037	0.141393	0.0847307	0.133634	0.226325	0.738194	0.407036	1	0.0775044	0.22453
Cd44	0.215091	0.0473971	0.135918	0.059401	0.0725126	0.116636	0.0778071	0.0651129	0.111637	0.14056	0.838655	0.42239	1	0.490466	0.275008
Upk3b	0.0100531	0.00182158	0.866171	0.0445521	0.00142928	0.00150286	0.143076	0.0503617	0.00164455	0.046109	0.0085678	0.0213964	1	0.00978483	0.000733935
Hp	0.288521	0.0494454	0.0924725	0.0527957	0.0943628	0.125817	0.084083	0.0632374	0.157184	0.24787	0.887526	0.536941	1	0.0816532	0.07818
Cldn7	0.00818169	0.0115734	0.225046	0.204235	0.407354	0.525962	0.36996	0.308361	0.318202	0.0343922	0.0277411	0.0292505	1	0.0412711	0.890955
Isg20	0.113542	0.267528	0.714887	0.55328	0.33906	0.293443	0.472151	0.415194	0.211686	0.268262	0.478019	0.381286	1	0.819409	0.905357
Xbp1	0.623061	0.518282	0.95014	0.721876	0.250946	0.394215	0.642692	0.638295	0.478553	0.50533	0.437485	0.565047	1	0.460107	0.240975
Prom2	0.0199392	0.0239216	0.435072	0.971286	0.869922	0.454525	0.203891	0.173247	0.204063	0.108361	0.0423855	0.0682937	1	0.0237781	0.970933
Tenm3	0.961826	0.0731611	0.575066	0.178025	0.0324419	0.0369425	0.431274	0.542256	0.0516112	0.159436	0.129607	0.978496	1	0.323467	0.0784722
Chl1	0.0408318	0.0171386	0.026523	0.0223273	0.0249876	0.117687	0.0433013	0.0834181	0.979673	0.041917	0.122043	0.167551	1	0.052704	0.0503283
Stc2	0.365016	0.0326537	0.0895081	0.0131809	0.00416627	0.0058258	0.0311979	0.00703428	0.00448886	0.0236941	0.0119063	0.0467462	0.00943376	1	0.00793735
Ccl2	0.227014	0.0753679	0.111513	0.0371683	0.0215021	0.0451825	0.0629802	0.0560559	0.0639365	0.285681	0.398563	0.375902	0.0365823	1	0.0377607
Krt20	0.0283167	0.16793	0.0935671	0.00835592	0.0381717	0.0467722	0.00556916	0.00441164	0.0166543	0.0368193	0.0532379	0.0413301	0.11978	1	0.0981939
Vcam1	0.233256	0.515933	0.0985813	0.0345001	0.0424385	0.0673559	0.045623	0.0469546	0.0839256	0.511969	0.387539	0.48146	0.0669185	1	0.0880181
C3	0.347852	0.336506	0.130827	0.112536	0.0801821	0.0733275	0.0418301	0.0438097	0.0738807	0.130384	0.434584	0.536253	0.287535	1	0.170942
Cxcl10	0.424978	0.431372	0.353863	0.136526	0.207583	0.413208	0.168047	0.18548	0.258135	0.413654	0.530723	0.503883	0.142213	1	0.594342
Cp	0.304565	0.22231	0.608347	0.0452278	0.0499205	0.0734368	0.0775051	0.0706033	0.122156	0.138892	0.118768	0.364192	0.467983	1	0.0802078
Cplx2	0.541213	0.510183	0.470723	0.306095	0.285454	0.31204	0.330067	0.246381	0.213296	0.534224	0.355917	0.66787	0.297582	1	0.458845
Gc	0.153275	0.723095	0.166151	0.0383878	0.0340243	0.031461	0.0218112	0.0321727	0.0523077	0.127623	0.0579979	0.109063	0.0112891	1	0.0232439
Havcr1	0.0442079	0.738645	0.436569	0.108351	0.0593985	0.0478065	0.0497334	0.0470719	0.0470444	0.20369	0.211637	0.210484	0.0370752	1	0.155247
Slc6a15	0.0718878	0.823836	0.349226	0.0607243	0.0293284	0.0588583	0.0524084	0.053265	0.038789	0.117713	0.0594636	0.104822	0.038387	1	0.0222997
Dcdc2a	0.90858	0.132745	0.753188	0.298726	0.337665	0.150618	0.298569	0.0589994	0.0296614	0.0917422	0.0545273	0.0720824	0.167067	1	0.845301
Myo5b	0.3988	0.812115	0.956218	0.231037	0.150789	0.240297	0.283574	0.630362	0.367236	0.195443	0.109443	0.128334	0.360928	1	0.182036
Cd74	0.80483	0.619055	0.712191	0.611457	0.583157	0.612364	0.827967	0.477074	0.578475	0.828752	0.86399	0.825874	0.833927	1	0.96591
Cenpf	0.017905	0.0119637	0.0150448	0.00935188	0.0491329	0.0520968	0.0272042	0.0183736	0.0256086	0.0203126	0.0790857	0.0664575	0.181918	0.0401249	1
Ube2c	0.0289464	0.0165984	0.0242275	0.0285646	0.0667654	0.0817422	0.0549573	0.0369455	0.0447798	0.0468711	0.19259	0.12016	0.172719	0.0381687	1
Cep128	0.0872916	0.0537114	0.0896095	0.0421766	0.0482943	0.0733768	0.0826489	0.0761523	0.0745032	0.089858	0.24122	0.136648	0.122708	0.133689	1
Top2a	0.0277527	0.0244422	0.0345388	0.0341829	0.0495916	0.0582999	0.0617995	0.0341148	0.0413521	0.0639521	0.26174	0.155994	0.162736	0.0600146	1
Stmn1	0.141442	0.157364	0.14518	0.103272	0.0970057	0.11828	0.0766727	0.0509242	0.0682738	0.116476	0.24554	0.201491	0.28411	0.264253	1
Mki67	0.0351044	0.0229943	0.0264751	0.0154123	0.0503867	0.0643405	0.0458843	0.0344029	0.0389984	0.0581771	0.306806	0.209026	0.198925	0.0612823	1
Pola1	0.201715	0.135819	0.20953	0.185395	0.129716	0.14193	0.164271	0.123268	0.114947	0.201201	0.394975	0.278437	0.286861	0.280962	1
Atad2	0.104145	0.0509823	0.0749937	0.0560831	0.098692	0.115479	0.0851942	0.072555	0.0843666	0.160778	0.400704	0.263682	0.261068	0.132281	1
Sostdc1	0.00689605	0.00376856	0.0629693	0.334994	0.589632	0.440201	0.0594384	0.0429658	0.0424481	0.0341369	0.0234495	0.0300286	0.0090394	0.00816536	1
Sox9	0.105677	0.120898	0.106919	0.0803662	0.43385	0.326824	0.114359	0.0670647	0.0962195	0.0516446	0.0743146	0.102304	0.152705	0.685088	1
Hmbs	0.637556	0.801514	0.693504	0.772465	0.77248	0.611405	0.668671	0.798395	0.719748	0.595272	0.640703	0.624117	0.793765	0.752547	1
Fxyd6	0.515408	0.01288	0.126771	0.0795131	0.773904	0.46908	0.0667879	0.0679093	0.117035	0.336878	0.0929143	0.199552	0.808624	0.0710328	1
Hap1	0.284101	0.1081	0.773687	0.371485	0.407992	0.489245	0.456302	0.376022	0.278197	0.242701	0.126805	0.188144	0.934118	0.675517	1
Psmb8	0.823516	0.59552	0.752309	0.736874	0.434783	0.603425	0.772958	0.421336	0.463213	0.60547	0.930887	0.441716	0.819467	0.888899	1

## Sheet: Figure S4B
Figure S4B
Sample	Cell type	% of sample
BALB/c to BALB/c 1	CD-IC-A	0.892085
BALB/c to C57BL/6 1	CD-IC-A	0.324989
BALB/c to C57BL/6 3	CD-IC-A	0.273573
C57BL/6 to BALB/c 1	CD-IC-A	0.212213
C57BL/6 to BALB/c 2	CD-IC-A	0.191438
C57BL/6 to BALB/c 3	CD-IC-A	0.185692
C57BL/6 to C57BL/6 1	CD-IC-A	0.805741
BALB/c to BALB/c 1	CD-IC-B	0.945623
BALB/c to C57BL/6 1	CD-IC-B	0.466561
BALB/c to C57BL/6 3	CD-IC-B	0.485426
C57BL/6 to BALB/c 1	CD-IC-B	0.587018
C57BL/6 to BALB/c 2	CD-IC-B	0.281983
C57BL/6 to BALB/c 3	CD-IC-B	0.352213
C57BL/6 to C57BL/6 1	CD-IC-B	1.28947
BALB/c to BALB/c 1	CD-PC	4.34174
BALB/c to C57BL/6 1	CD-PC	2.66366
BALB/c to C57BL/6 3	CD-PC	2.75108
C57BL/6 to BALB/c 1	CD-PC	3.151
C57BL/6 to BALB/c 2	CD-PC	2.28912
C57BL/6 to BALB/c 3	CD-PC	2.02382
C57BL/6 to C57BL/6 1	CD-PC	4.44385
BALB/c to BALB/c 1	CNT	3.29291
BALB/c to C57BL/6 1	CNT	1.7806
BALB/c to C57BL/6 3	CNT	2.12219
C57BL/6 to BALB/c 1	CNT	2.50644
C57BL/6 to BALB/c 2	CNT	2.28469
C57BL/6 to BALB/c 3	CNT	2.48203
C57BL/6 to C57BL/6 1	CNT	4.17671
BALB/c to BALB/c 1	DCT	4.01342
BALB/c to C57BL/6 1	DCT	1.21744
BALB/c to C57BL/6 3	DCT	1.1797
C57BL/6 to BALB/c 1	DCT	1.44062
C57BL/6 to BALB/c 2	DCT	1.25063
C57BL/6 to BALB/c 3	DCT	0.987851
C57BL/6 to C57BL/6 1	DCT	4.48717
BALB/c to BALB/c 1	EC	10.9321
BALB/c to C57BL/6 1	EC	5.52325
BALB/c to C57BL/6 3	EC	4.78453
C57BL/6 to BALB/c 1	EC	4.92419
C57BL/6 to BALB/c 2	EC	4.2035
C57BL/6 to BALB/c 3	EC	4.14461
C57BL/6 to C57BL/6 1	EC	11.6869
BALB/c to BALB/c 1	IntC	10.974
BALB/c to C57BL/6 1	IntC	14.2729
BALB/c to C57BL/6 3	IntC	12.8566
C57BL/6 to BALB/c 1	IntC	13.6344
C57BL/6 to BALB/c 2	IntC	12.1171
C57BL/6 to BALB/c 3	IntC	10.6213
C57BL/6 to C57BL/6 1	IntC	11.8392
BALB/c to BALB/c 1	Leuko	3.21486
BALB/c to C57BL/6 1	Leuko	44.5145
BALB/c to C57BL/6 3	Leuko	49.6242
C57BL/6 to BALB/c 1	Leuko	48.3012
C57BL/6 to BALB/c 2	Leuko	58.1088
C57BL/6 to BALB/c 3	Leuko	60.2048
C57BL/6 to C57BL/6 1	Leuko	2.70313
BALB/c to BALB/c 1	PEC	0.476037
BALB/c to C57BL/6 1	PEC	0.558074
BALB/c to C57BL/6 3	PEC	0.389341
C57BL/6 to BALB/c 1	PEC	0.182651
C57BL/6 to BALB/c 2	PEC	0.470833
C57BL/6 to BALB/c 3	PEC	0.5567
C57BL/6 to C57BL/6 1	PEC	0.228149
BALB/c to BALB/c 1	Podo	1.72031
BALB/c to C57BL/6 1	Podo	1.01994
BALB/c to C57BL/6 3	Podo	0.9882
C57BL/6 to BALB/c 1	Podo	0.873664
C57BL/6 to BALB/c 2	Podo	0.638988
C57BL/6 to BALB/c 3	Podo	0.795769
C57BL/6 to C57BL/6 1	Podo	2.2259
BALB/c to BALB/c 1	Prolif	0.0212862
BALB/c to C57BL/6 1	Prolif	0.0535782
BALB/c to C57BL/6 3	Prolif	0.0326953
C57BL/6 to BALB/c 1	Prolif	0.0670425
C57BL/6 to BALB/c 2	Prolif	0.0898058
C57BL/6 to BALB/c 3	Prolif	0.149982
C57BL/6 to C57BL/6 1	Prolif	0.0072199
BALB/c to BALB/c 1	PT	39.2485
BALB/c to C57BL/6 1	PT	17.138
BALB/c to C57BL/6 3	PT	16.8348
C57BL/6 to BALB/c 1	PT	16.2734
C57BL/6 to BALB/c 2	PT	10.5147
C57BL/6 to BALB/c 3	PT	12.1561
C57BL/6 to C57BL/6 1	PT	38.3406
BALB/c to BALB/c 1	TAL	16.3046
BALB/c to C57BL/6 1	TAL	7.34843
BALB/c to C57BL/6 3	TAL	5.42309
C57BL/6 to BALB/c 1	TAL	5.87915
C57BL/6 to BALB/c 2	TAL	3.90674
C57BL/6 to BALB/c 3	TAL	3.44658
C57BL/6 to C57BL/6 1	TAL	13.3149
BALB/c to BALB/c 1	tL	3.36387
BALB/c to C57BL/6 1	tL	2.96636
BALB/c to C57BL/6 3	tL	1.85629
C57BL/6 to BALB/c 1	tL	1.62063
C57BL/6 to BALB/c 2	tL	3.19457
C57BL/6 to BALB/c 3	tL	1.19159
C57BL/6 to C57BL/6 1	tL	3.88936
BALB/c to BALB/c 1	Uro	0.25866
BALB/c to C57BL/6 1	Uro	0.15174
BALB/c to C57BL/6 3	Uro	0.398349
C57BL/6 to BALB/c 1	Uro	0.346298
C57BL/6 to BALB/c 2	Uro	0.457159
C57BL/6 to BALB/c 3	Uro	0.701043
C57BL/6 to C57BL/6 1	Uro	0.561709

## Sheet: Figure S4C
Figure S4C
Individual data points are not displayed because of the high data volume and because they can be fully recapitulated from the dataset deposited at GEO (accession GSE284742).

## Sheet: Figure S4D
Figure S4D
BALB/c to BALB/c 1	155356
C57BL/6 to C57BL/6 1	138874
BALB/c to C57BL/6 1	256320
BALB/c to C57BL/6 3	300478
C57BL/6 to BALB/c 1	190008
C57BL/6 to BALB/c 2	271738
C57BL/6 to BALB/c 3	267373

## Sheet: Figure S6A
Figure S6A	Pathway enrichment of downregulated DGE-genes per celltype
Pathway	AdjustedPValue	CellType	Strain	log10_fdr (capped at 3 in the plot)
Adipogenesis	0.046646	PT	Balbc	1.33119
Adipogenesis	2.75045e-05	PT	Blck6	4.5606
Adipogenesis	1.26781e-08	TAL	Blck6	7.89694
Adipogenesis	3.10294e-05	DCT	Blck6	4.50823
Adipogenesis	0.0275734	CNT	Blck6	1.55951
Adipogenesis	1.76559e-06	EC	Blck6	5.75311
Adipogenesis	0.00313375	IntC	Blck6	2.50394
Androgen Response	0.0138008	PT	Blck6	1.8601
Androgen Response	0.00321436	TAL	Blck6	2.4929
Apical Surface	0.0132192	CNT	Balbc	1.8788
Bile Acid Metabolism	0.046646	PT	Balbc	1.33119
Bile Acid Metabolism	7.11859e-06	PT	Blck6	5.14761
Bile Acid Metabolism	1.07156e-06	TAL	Blck6	5.96998
Bile Acid Metabolism	0.00013209	DCT	Blck6	3.87913
Bile Acid Metabolism	0.0118909	EC	Blck6	1.92479
Bile Acid Metabolism	0.00313375	IntC	Blck6	2.50394
Cholesterol Homeostasis	2.20232e-05	PT	Blck6	4.65712
Cholesterol Homeostasis	1.89007e-06	TAL	Blck6	5.72352
Epithelial Mesenchymal Transition	0.022793	IntC	Balbc	1.6422
Estrogen Response Early	0.0140878	TAL	Blck6	1.85116
Estrogen Response Early	0.038105	EC	Blck6	1.41902
Estrogen Response Late	0.00203085	PT	Blck6	2.69232
Estrogen Response Late	0.00203742	TAL	Blck6	2.69092
Estrogen Response Late	0.00447439	DCT	Blck6	2.34927
Estrogen Response Late	0.00191027	CD-IC-A	Blck6	2.71891
Estrogen Response Late	0.000284903	EC	Blck6	3.5453
Estrogen Response Late	0.0422212	Uro	Blck6	1.37447
Fatty Acid Metabolism	0.000160528	PT	Balbc	3.79445
Fatty Acid Metabolism	1.54507e-11	PT	Blck6	10.8111
Fatty Acid Metabolism	1.41737e-09	TAL	Blck6	8.84852
Fatty Acid Metabolism	2.58539e-06	DCT	Blck6	5.58747
Fatty Acid Metabolism	0.0107075	CNT	Blck6	1.97031
Fatty Acid Metabolism	1.12827e-06	EC	Blck6	5.94759
Fatty Acid Metabolism	0.000131417	IntC	Blck6	3.88135
Glycolysis	0.00493391	PT	Blck6	2.30681
Glycolysis	0.0053117	TAL	Blck6	2.27477
Glycolysis	0.038105	EC	Blck6	1.41902
Glycolysis	0.0394063	IntC	Blck6	1.40443
Hypoxia	0.0486874	Podo	Blck6	1.31258
Hypoxia	0.0346656	TAL	Blck6	1.4601
Hypoxia	0.0394063	IntC	Blck6	1.40443
KRAS Signaling Dn	0.00203742	TAL	Blck6	2.69092
KRAS Signaling Dn	0.0132192	CNT	Balbc	1.8788
KRAS Signaling Dn	0.0328908	CD-IC-A	Blck6	1.48293
Oxidative Phosphorylation	1.41737e-09	TAL	Blck6	8.84852
Oxidative Phosphorylation	3.10294e-05	DCT	Blck6	4.50823
Oxidative Phosphorylation	0.0131788	EC	Blck6	1.88012
Peroxisome	0.00615779	PT	Blck6	2.21058
Peroxisome	1.89007e-06	TAL	Blck6	5.72352
Peroxisome	0.0263516	DCT	Blck6	1.57919
Peroxisome	0.00952595	EC	Blck6	2.02109
UV Response Dn	0.00145153	TAL	Blck6	2.83817
UV Response Dn	0.00111006	DCT	Blck6	2.95465
UV Response Dn	0.0107075	CNT	Blck6	1.97031
UV Response Dn	0.0305567	CD-IC-B	Blck6	1.51489
UV Response Dn	4.31582e-06	EC	Balbc	5.36494
UV Response Dn	0.000447852	EC	Blck6	3.34887
UV Response Dn	0.022793	IntC	Balbc	1.6422
Xenobiotic Metabolism	4.3221e-05	PT	Balbc	4.3643
Xenobiotic Metabolism	1.25799e-10	PT	Blck6	9.90032
Xenobiotic Metabolism	0.0462928	tL	Blck6	1.33449
Xenobiotic Metabolism	3.03307e-09	TAL	Blck6	8.51812
Xenobiotic Metabolism	2.58539e-06	DCT	Blck6	5.58747
Xenobiotic Metabolism	0.0275734	CNT	Blck6	1.55951
Xenobiotic Metabolism	0.0328908	CD-IC-A	Blck6	1.48293
Xenobiotic Metabolism	1.22655e-08	EC	Blck6	7.91132
Xenobiotic Metabolism	3.55157e-05	IntC	Blck6	4.44958
mTORC1 Signaling	0.00203085	PT	Blck6	2.69232
mTORC1 Signaling	0.00203742	TAL	Blck6	2.69092
mTORC1 Signaling	0.0305567	CD-IC-B	Blck6	1.51489

## Sheet: Figure S6B left
Figure S6B	Gene Expression matrix per celltype and strain for each DGE gene of any celltype (upregulated), values only appear if log2FC > 1
Gene	Up_Podo_Blck6	Up_Podo_Balbc	Up_PT_Blck6	Up_PT_Balbc	Up_tL_Blck6	Up_tL_Balbc	Up_TAL_Blck6	Up_TAL_Balbc	Up_DCT_Blck6	Up_DCT_Balbc	Up_CNT_Blck6	Up_CNT_Balbc	Up_CD-PC_Blck6	Up_CD-PC_Balbc	Up_CD-IC-A_Blck6	Up_CD-IC-A_Balbc	Up_CD-IC-B_Blck6	Up_CD-IC-B_Balbc	Up_EC_Blck6	Up_EC_Balbc	Up_IntC_Blck6	Up_IntC_Balbc	Up_Uro_Blck6	Up_Uro_Balbc	Up_PEC_Blck6	Up_PEC_Balbc
0610012G03Rik	0	0	0	0	0	0	0	0	0	0	0	0	0	1.35094	0	0	0	0	0	0	0	0	0	0	0	0
0610040F04Rik	0	0	0	0	0	0	0	0	3.35447	0	0	0	0	0	0	0	0	0	0	0	0	0	0	0	0	0
1110008P14Rik	0	0	0	0	0	0	0	0	0	0	0	0	0	1.0099	0	0	0	0	0	0	0	0	0	0	0	0
1110038F14Rik	0	0	2.07709	0	0	0	0	0	0	0	2.81918	0	0	0	0	0	0	0	0	0	0	0	0	0	0	0
1700016C15Rik	0	0	1.02208	0	0	0	0	0	0	0	0	0	0	0	0	0	0	0	0	0	0	0	0	0	0	0
1700016D06Rik	0	0	0	1.03595	0	0	0	0	0	0	0	1.52679	0	0	0	0	0	0	0	0	0	0	0	0	0	0
1700024B05Rik	0	0	0	0	0	0	0	0	2.85122	0	0	0	0	0	0	0	0	0	0	0	0	0	0	0	0	0
1700030F04Rik	0	0	1.00954	0	0	0	0	0	0	0	0	0	0	0	0	0	0	0	0	0	0	0	0	0	0	0
1700109K24Rik	0	0	0	0	0	0	3.09827	0	0	0	0	0	0	0	0	0	0	0	0	0	0	0	0	0	0	0
1810034E14Rik	0	0	0	0	0	0	0	0	1.78398	0	0	0	0	0	0	0	0	0	0	0	0	0	0	0	0	0
1810037I17Rik	0	0	1.07453	1.13226	0	0	0	0	0	0	0	1.35754	0	1.1522	0	0	0	0	0	0	0	0	0	0	0	0
2200002D01Rik	0	0	2.17032	0	0	0	0	0	0	0	0	0	0	0	0	0	0	0	0	0	0	0	0	0	0	0
2310001H17Rik	0	0	1.56481	1.10748	0	0	0	0	0	0	0	0	0	0	0	0	0	0	0	0	0	0	0	0	0	0
2810425M01Rik	0	0	1.26903	0	0	0	0	0	0	0	0	0	0	0	0	0	0	0	0	0	0	0	0	0	0	0
2810474O19Rik	0	0	1.58051	0	0	0	0	0	1.33337	0	1.45315	0	1.37699	0	0	0	1.91742	0	0	0	0	0	0	0	0	0
4833422C13Rik	0	0	1.8795	0	0	0	0	0	0	0	0	0	0	0	0	0	0	0	0	0	0	0	0	0	0	0
4930405A10Rik	0	0	2.48936	0	0	0	0	0	0	0	0	0	0	0	0	0	0	0	0	0	0	0	0	0	0	0
4930444A19Rik	0	0	1.64862	0	0	0	0	0	0	0	0	0	0	0	0	0	0	0	0	0	0	0	0	0	0	0
4930455C13Rik	0	0	1.28547	0	0	0	0	0	0	0	0	0	0	0	0	0	0	0	0	0	0	0	0	0	0	0
4930486I03Rik	0	0	1.30122	0	0	0	0	0	1.58548	0	1.70747	0	0	0	0	0	0	0	0	0	0	0	0	0	0	0
4930523C07Rik	0	0	4.54003	0	0	0	0	0	0	0	0	0	0	0	0	0	0	0	0	0	0	0	0	0	0	0
4930533B01Rik	0	0	1.95465	0	0	0	0	0	0	0	0	0	0	0	0	0	0	0	0	0	0	0	0	0	0	0
4930550C14Rik	0	0	0	0	0	0	0	0	1.77709	1.50401	0	0	0	0	0	0	0	0	0	0	0	0	0	0	0	0
4930599N23Rik	0	0	2.89698	1.56842	0	0	1.15856	0	2.07677	1.31534	2.6334	0	0	0	0	0	0	0	0	0	0	0	0	0	0	0
4932411K12Rik	0	0	0	0	0	0	0	0	2.11036	1.91897	0	0	0	0	0	0	0	0	0	0	0	0	0	0	0	0
5730559C18Rik	0	0	2.34518	1.37249	0	0	0	0	0	0	0	0	0	0	0	0	0	0	0	0	0	0	0	0	0	0
6330562C20Rik	0	0	1.0287	1.02131	0	0	0	0	0	0	0	0	0	0	0	0	0	0	0	0	0	0	0	0	0	0
6530409C15Rik	0	0	1.69256	0	0	0	1.3941	0	0	0	0	0	0	0	0	0	0	0	0	0	0	0	0	0	0	0
9030025P20Rik	0	0	1.92954	0	0	0	0	0	0	0	0	0	0	0	0	0	0	0	0	0	0	0	0	0	0	0
9130230L23Rik	0	0	0	0	0	0	2.77574	1.15409	1.97128	0	0	0	0	0	0	0	0	0	0	0	0	0	0	0	0	0
9530026P05Rik	0	0	0	0	0	0	0	0	1.23432	0	0	0	0	0	1.76549	0	0	0	0	0	0	0	0	0	0	0
9530068E07Rik	0	0	0	0	0	0	0	0	0	0	0	0	0	1.19352	0	0	0	0	0	0	0	0	0	0	0	0
9530082P21Rik	0	0	4.94187	3.76611	0	0	0	0	0	0	0	0	0	1.69877	0	0	0	0	0	0	0	0	0	0	0	0
A230050P20Rik	0	0	3.04847	1.89546	0	0	2.03046	1.42255	3.15439	0	0	0	0	0	0	0	0	0	0	0	0	0	0	0	0	0
A4galt	0	0	0	0	0	0	0	0	3.80902	0	0	0	0	0	0	0	0	0	0	0	0	0	0	0	0	0
A930015D03Rik	0	0	0	1.33871	0	0	0	0	0	0	0	0	0	0	0	0	0	0	0	0	0	0	0	0	0	0
AA467197	0	0	0	0	0	0	0	0	0	0	0	0	0	0	0	0	0	0	6.98308	3.1391	0	0	0	0	0	0
Abca1	0	0	1.91525	0	0	0	3.21715	0	0	0	0	0	0	0	0	0	0	0	0	0	0	0	0	0	0	0
Abca13	0	0	0	1.12591	0	0	0	0	0	0	1.04795	1.3145	0	2.98826	0	0	0	0	0	0	0	0	0	0	0	0
Abcg1	0	0	0	0	0	0	3.40909	0	0	0	0	0	0	0	0	0	0	0	0	0	0	0	0	0	0	0
Abhd2	0	0	0	1.01422	0	0	0	0	0	0	0	0	0	0	0	0	0	0	0	0	0	0	0	0	0	0
Abi2	0	0	1.03541	0	0	0	0	0	0	0	0	0	0	0	0	0	0	0	0	0	0	0	0	0	0	0
Abracl	0	0	1.47369	1.30298	0	0	1.32872	1.42489	0	0	0	1.87121	0	1.90512	0	0	0	0	0	1.47143	0	1.84313	0	0	0	0
AC133498.1	0	0	6.76173	0	0	0	3.71087	0	0	0	0	0	0	0	0	0	0	0	0	0	0	0	0	0	0	0
AC135964.2	0	0	2.02944	0	0	0	4.404	0	3.54566	0	0	0	0	0	0	0	0	0	0	0	0	0	0	0	0	0
AC139671.1	0	0	0	0	0	0	0	0	5.36654	0	0	0	0	0	0	0	0	0	0	0	0	0	0	0	0	0
AC166344.1	0	0	2.03439	1.56157	0	0	0	0	2.35394	0	0	0	0	0	0	0	0	0	0	0	0	0	0	0	0	0
Acadl	0	0	0	0	0	0	0	0	1.13217	1.18165	1.25145	1.26793	0	1.26137	0	0	0	1.36114	0	0	2.11749	1.23997	0	0	0	0
Acat3	0	0	1.05476	0	0	0	0	0	0	0	0	0	0	0	0	0	0	0	0	0	0	0	0	0	0	0
Ackr3	0	0	0	1.44897	0	0	0	0	0	0	0	0	0	0	0	0	0	0	0	0	0	0	0	0	0	0
Acnat2	0	0	2.50408	0	0	0	0	0	0	0	0	0	0	0	0	0	0	0	0	0	0	0	0	0	0	0
Acot9	0	0	1.78394	1.35853	0	0	1.41039	0	1.63129	1.01429	1.69523	0	0	0	0	0	0	0	0	0	0	0	0	0	0	0
Acsl4	0	0	1.98435	0	0	0	1.84574	0	0	0	0	0	0	0	0	0	0	0	0	0	0	0	0	0	0	0
Acsl5	0	0	1.35118	1.46833	0	0	1.3579	1.28384	1.50411	0	0	0	0	0	0	0	0	0	0	0	0	0	0	0	0	0
Acta2	0	0	0	0	0	0	0	0	0	0	0	0	0	0	0	0	0	0	0	0	3.02449	2.46395	0	0	0	0
Actb	0	1.10962	1.20157	2.25029	0	1.23358	0	1.83068	1.2777	1.87804	0	1.86377	0	1.66365	0	1.93903	0	1.15495	0	1.69385	0	1.75565	0	0	0	1.81894
Actg1	0	0	0	0	0	0	0	0	0	0	1.08142	0	0	1.06522	0	0	0	0	0	0	0	1.62873	0	0	0	0
Actn1	0	0	2.20878	1.44054	0	0	1.31357	0	0	0	0	0	0	0	0	0	0	0	0	2.27909	0	1.20174	0	0	0	0
Actn4	0	0	0	0	0	0	0	0	0	0	0	0	0	0	0	1.19031	0	0	0	0	0	0	0	0	0	0
Actr3	0	0	0	0	0	0	0	0	0	0	0	0	0	0	0	0	0	0	0	1.32623	0	1.10669	0	0	0	0
Acy3	0	0	0	0	0	0	0	0	0	0	0	1.24176	0	1.5941	0	0	0	0	0	0	0	0	0	0	0	0
Adam15	0	0	1.07215	0	0	0	0	0	0	0	0	0	0	0	0	0	0	0	0	0	0	0	0	0	0	0
Adamts1	0	0	1.89351	2.45295	0	2.39162	5.27994	4.0533	4.88938	0	7.14587	2.57072	0	2.11698	0	0	0	0	0	0	0	0	0	0	0	0
Adamts6	0	0	0	0	0	0	1.90229	0	1.5123	1.17313	1.3485	1.25582	0	2.07672	0	0	0	0	2.14082	1.17714	0	3.07037	0	0	0	0
Adamts9	0	0	0	0	0	0	0	0	2.14293	0	0	0	0	0	0	0	0	0	2.5537	0	0	0	0	0	0	0
Adap1	0	0	1.35036	1.54875	0	0	0	0	0	0	0	0	0	0	0	0	0	0	0	0	0	0	0	0	0	0
Adar	0	0	1.30675	1.46015	0	0	0	0	0	1.13551	0	0	0	0	0	0	0	0	0	0	0	0	0	0	0	0
Adcy7	0	0	0	0	0	0	0	0	0	0	0	0	0	0	0	0	0	0	0	0	0	3.92771	0	0	0	0
Adgrf5	0	0	0	0	0	0	0	0	0	0	0	0	0	0	0	0	2.00462	0	0	0	0	0	0	0	0	0
Adgrg1	0	0	2.20192	1.60536	0	0	0	0	0	0	1.00875	0	0	0	0	1.23485	0	0	0	1.06829	0	0	0	0	0	0
Adgrg3	0	0	4.33505	3.41722	0	1.8073	2.94941	1.63495	3.38807	2.23268	2.10668	1.05754	0	0	0	0	0	0	0	0	0	0	0	0	0	0
Aen	0	0	1.51198	0	0	0	2.18867	0	0	0	0	0	0	0	0	0	0	0	0	0	0	0	0	0	0	0
Aff3	0	0	0	0	0	0	0	0	0	0	0	0	0	0	0	0	0	0	0	0	0	1.10248	0	0	0	0
Agrn	0	0	1.36693	0	0	0	0	0	0	0	0	0	0	0	0	0	0	0	0	0	0	0	0	0	0	0
Ahr	0	0	1.54065	0	0	0	0	0	0	0	0	0	0	0	0	0	0	0	0	0	0	0	0	0	0	0
Aida	0	0	1.95784	1.4517	0	0	0	0	0	0	0	0	0	1.66968	0	0	0	0	0	1.25099	0	0	0	0	0	0
Aif1	0	0	6.01857	0	0	0	4.82385	0	0	0	0	0	0	3.7856	0	0	0	0	0	4.13547	0	4.48466	0	0	0	0
Aif1l	0	0	0	1.03989	0	0	0	0	0	0	0	0	0	0	0	0	0	0	0	0	0	0	0	0	0	0
Aig1	0	0	1.721	1.32072	0	0	0	0	0	0	0	0	0	0	0	0	0	0	0	0	0	0	0	0	0	0
Ak2	0	0	0	0	0	0	0	0	0	0	0	0	0	0	0	0	0	0	0	1.44101	0	0	0	0	0	0
Akr1b10	0	0	0	1.05263	0	0	0	0	0	0	0	0	0	0	0	0	0	0	0	0	0	0	0	0	0	0
Akr1b3	0	0	1.85091	0	0	0	0	0	0	0	0	0	0	0	0	0	0	0	0	0	0	0	0	0	0	0
Akr1b8	0	0	0	0	0	0	3.40683	0	0	0	0	0	0	0	0	0	0	0	0	0	0	0	0	0	0	0
Akr1c20	0	0	0	1.72345	0	0	0	0	0	0	0	0	0	0	0	0	0	0	0	0	0	0	0	0	0	0
Akt1	0	0	1.05182	0	0	0	0	0	0	0	0	0	0	1.26366	0	0	0	0	0	0	0	0	0	0	0	0
Akt3	0	0	4.13655	3.15664	0	0	2.6216	1.9763	1.84492	1.2749	2.84108	1.81389	0	0	0	2.54436	3.34071	2.01211	0	0	0	0	0	0	0	0
Alcam	0	0	0	0	0	0	0	0	0	0	0	0	0	0	0	0	0	0	0	1.86308	0	0	0	0	0	0
Aldoa	0	0	0	0	0	0	0	0	0	0	0	0	0	1.12231	0	0	0	0	0	0	0	0	0	0	0	0
Aldob	0	0	0	0	0	0	0	0	0	0	0	0	0	1.08449	0	0	0	0	0	0	0	0	0	0	0	0
Alpk1	0	0	2.0496	2.1055	0	0	0	0	0	0	0	0	0	0	0	0	0	0	0	0	0	0	0	0	0	0
Amfr	0	0	0	0	0	0	0	0	0	0	0	0	0	1.1205	0	0	0	0	0	0	0	0	0	0	0	0
Amn1	0	0	1.00686	0	0	0	0	0	0	0	0	0	0	0	0	0	0	0	0	0	0	0	0	0	0	0
Amotl2	0	0	1.50499	0	0	0	0	0	0	0	0	0	0	0	0	0	0	0	0	0	0	0	0	0	0	0
Ampd3	0	0	1.66233	0	0	0	0	0	0	0	0	0	0	0	0	0	0	0	0	0	0	0	0	0	0	0
Anapc15	0	0	0	0	0	0	0	0	0	0	0	0	0	2.14723	0	0	0	0	0	0	0	0	0	0	0	0
Angptl4	0	0	1.51121	0	0	0	3.32725	0	0	0	0	0	0	0	0	0	0	0	0	0	0	0	0	0	0	0
Ankrd29	0	0	1.20736	1.00929	0	0	0	0	0	0	0	0	0	0	0	0	0	0	0	0	0	0	0	0	0	0
Ankrd37	0	0	0	0	0	0	0	0	0	0	0	0	0	1.94758	0	0	0	0	0	0	0	0	0	0	0	0
Ankrd45	0	0	0	0	0	0	0	0	1.7193	0	0	0	0	0	0	0	0	0	0	0	0	0	0	0	0	0
Ankrd46	0	0	0	0	0	0	1.21467	0	0	0	0	0	0	0	0	0	0	0	0	0	0	0	0	0	0	0
Ankrd6	0	0	0	1.1547	0	0	0	0	0	0	0	0	0	0	0	0	0	0	0	0	0	0	0	0	0	0
Ano4	0	0	0	0	0	0	0	0	0	0	0	0	0	0	0	0	0	0	0	0	0	3.79387	0	0	0	0
Ano9	0	0	2.42141	1.87108	0	0	1.32753	0	1.91373	0	0	0	0	0	0	0	0	0	0	0	0	0	0	0	0	0
Anxa1	0	0	0	0	0	0	0	0	0	0	0	0	0	0	0	0	0	0	0	1.63509	0	0	0	0	0	0
Anxa2	0	0	3.91281	0	0	0	1.08128	0	3.89749	0	2.20173	1.94427	0	1.54889	0	0	0	0	0	0	0	1.31795	0	0	0	0
Anxa3	0	0	0	0	0	0	0	0	4.24148	0	4.26389	3.18036	0	0	0	0	0	0	0	0	0	0	0	0	0	0
Anxa4	0	0	1.06525	0	0	0	0	0	0	0	0	0	0	0	0	0	0	0	0	0	0	0	0	0	0	0
Anxa5	0	0	2.24556	2.10515	0	0	0	0	1.55766	0	1.39955	1.42398	0	0	0	0	0	0	0	0	0	0	0	0	0	0
Anxa6	0	0	0	1.17198	0	0	0	0	0	0	0	0	0	0	0	0	0	0	0	0	0	0	0	0	0	0
Aoc1	0	0	1.47935	0	0	0	1.3402	0	0	0	4.01613	0	0	0	0	0	0	0	0	0	0	0	0	0	0	0
Ap1s1	0	0	0	0	0	0	0	0	0	0	0	0	0	1.40736	0	0	0	0	0	0	0	0	0	0	0	0
Ap2b1	0	0	0	0	0	0	0	0	1.16109	0	0	0	0	0	0	0	0	0	0	0	0	0	0	0	0	0
Apaf1	0	0	1.22831	0	0	0	0	0	0	0	0	0	0	0	0	0	0	0	0	0	0	0	0	0	0	0
Apbb1ip	0	0	0	0	0	0	0	0	0	0	0	0	0	0	0	0	0	0	0	3.26646	0	2.39886	0	0	0	0
Apln	0	0	0	0	0	0	0	0	0	0	0	0	0	0	0	0	0	0	0	2.6817	0	0	0	0	0	0
Apobec1	0	0	2.0614	1.37164	0	0	0	0	0	0	0	0	0	0	0	0	0	0	0	0	0	0	0	0	0	0
Apobec3	0	0	5.97437	3.6781	0	0	5.64492	0	0	0	2.74651	0	1.67683	0	2.46572	0	4.66097	0	1.78935	0	0	0	0	0	0	0
Apoe	0	0	2.49617	0	0	1.39986	2.85771	1.07745	2.92539	1.42316	3.1517	0	3.68545	2.3332	4.94244	0	4.69404	0	0	0	0	0	0	0	0	0
Apol10b	0	0	0	6.08976	0	0	0	0	0	0	0	0	0	0	0	0	0	0	0	4.36892	0	0	0	0	0	0
Apol6	0	0	0	0	0	0	0	0	6.81377	0	7.63913	5.84346	4.76787	7.23741	0	0	0	0	0	0	0	6.06541	0	0	0	0
Aprt	0	0	0	0	0	0	0	1.37689	0	0	0	0	0	2.8144	0	0	0	0	0	0	0	0	0	0	0	0
Aqp2	0	0	1.45393	0	0	0	1.37386	0	0	0	0	0	0	0	0	0	0	0	0	0	0	0	0	0	0	0
Ar	0	0	0	0	0	0	0	0	0	0	0	0	0	2.4795	0	0	0	0	0	0	0	0	0	0	0	0
Arap2	0	0	0	0	0	0	2.95244	1.58617	1.98858	0	0	0	0	0	0	0	0	0	0	0	0	0	0	0	0	0
Arf1	0	0	0	0	0	0	0	0	0	1.07148	0	0	0	0	0	0	0	0	0	0	0	0	0	0	0	0
Arf5	0	0	0	1.08485	0	0	0	0	0	0	0	0	0	1.02258	0	0	0	0	0	0	0	1.39939	0	0	0	0
Arg2	0	0	1.88509	0	0	0	3.88894	0	0	0	0	0	0	0	0	0	0	0	0	0	0	0	0	0	0	0
Arhgap15	0	0	2.60348	1.79077	0	0	0	0	0	0	0	0	0	4.44806	0	0	0	0	0	3.36892	0	0	0	0	0	0
Arhgap22	0	0	0	1.03592	0	0	0	0	0	0	0	0	0	0	0	0	0	0	0	0	0	0	0	0	0	0
Arhgap28	0	0	0	0	0	0	2.56488	0	0	0	5.72671	0	0	0	0	0	0	0	0	0	0	0	0	0	0	0
Arhgap42	0	0	0	0	0	0	1.85235	0	0	0	0	0	0	0	0	0	0	0	0	0	0	0	0	0	0	0
Arhgap8	0	0	4.82078	3.87857	0	0	1.2451	1.44559	3.4727	2.12541	0	0	0	0	0	0	0	0	0	0	0	0	0	0	0	0
Arhgdia	0	0	0	1.04502	0	0	0	0	0	0	0	0	0	1.39885	0	0	0	0	0	0	0	0	0	0	0	0
Arhgdib	0	0	0	0	0	0	3.15968	0	0	0	0	0	0	0	0	0	0	0	0	2.05469	0	0	0	0	0	0
Arhgef37	0	0	0	0	0	0	2.7168	0	0	0	3.05687	0	0	0	0	0	0	0	0	0	0	0	0	0	0	0
Arhgef5	0	0	1.09721	0	0	0	1.02172	0	0	0	0	0	0	0	0	0	0	0	0	0	0	0	0	0	0	0
Arl15	0	0	0	0	0	0	0	0	1.32306	0	0	0	0	0	0	0	0	0	0	0	0	0	0	0	0	0
Arl4a	0	0	1.57604	0	0	0	0	0	0	0	0	0	0	0	0	0	0	0	0	0	0	0	0	0	0	0
Arl4c	0	0	0	0	0	0	0	0	2.14971	0	2.53694	0	0	0	0	0	0	0	0	0	0	0	0	0	0	0
Armc10	0	0	0	0	0	0	0	0	0	0	0	0	0	1.2947	0	0	0	0	0	0	0	0	0	0	0	0
Arntl	0	0	3.16043	1.9536	0	0	4.61512	2.23417	3.16344	0	1.75142	0	0	0	0	0	0	0	0	0	0	0	0	0	0	0
Arpc1b	0	0	1.89286	1.5006	0	0	2.05388	1.67367	1.64325	0	1.58475	0	0	1.4078	0	0	0	0	0	0	0	1.86497	0	0	0	0
Arpc2	0	0	0	0	0	0	0	0	0	0	0	0	0	0	0	0	0	0	0	0	0	1.22579	0	0	0	0
Arpc3	0	0	0	1.10389	0	0	0	1.03813	0	0	1.61014	1.05707	0	0	0	0	0	0	0	0	0	1.16372	0	0	0	0
Arpc5	0	0	1.30398	0	0	0	1.03079	0	0	0	0	1.12973	0	0	0	0	0	0	0	0	0	0	0	0	0	0
Arrb1	0	0	0	1.04217	0	0	0	0	0	0	0	0	0	0	0	0	0	0	0	0	0	0	0	0	0	0
Arrdc4	0	0	0	0	0	0	1.77228	0	0	0	0	0	0	1.86459	0	0	0	0	0	1.88621	0	0	0	0	0	0
Arsj	0	0	0	0	0	0	1.26944	0	0	0	0	0	0	0	0	0	0	0	0	0	0	0	0	0	0	0
Asap3	0	0	0	1.44199	0	0	0	0	0	0	0	0	0	0	0	0	0	0	0	0	0	0	0	0	0	0
Asic2	0	0	0	0	0	0	3.92793	0	0	0	0	0	0	0	0	0	0	0	0	0	0	0	0	0	0	0
Astn2	0	0	0	0	0	0	3.6242	1.63178	0	0	0	0	0	0	0	0	0	0	0	0	0	0	0	0	0	0
Atad2	0	0	0	2.27407	0	0	0	0	0	0	0	0	0	0	0	0	0	0	0	0	0	0	0	0	0	0
Atad5	0	0	0	1.06352	0	0	0	0	0	0	0	0	0	0	0	0	0	0	0	0	0	0	0	0	0	0
Atf4	0	0	0	0	0	0	0	0	0	0	0	0	0	1.41504	0	0	0	0	0	1.22256	0	0	0	0	0	0
Atf5	0	0	0	0	0	0	0	0	0	0	0	0	0	3.11778	0	0	0	0	0	0	0	0	0	0	0	0
Atg16l2	0	0	1.66734	0	0	0	0	0	0	0	0	0	0	0	0	0	0	0	0	0	0	0	0	0	0	0
Atox1	0	0	0	0	0	0	0	0	0	0	0	1.26022	0	1.03257	0	0	0	0	0	0	0	0	0	0	0	0
Atp11a	0	0	1.603	1.43783	0	0	2.65592	1.34457	1.66957	1.01496	1.95369	1.31169	0	1.11604	0	0	0	0	0	0	0	0	0	0	0	0
Atp6v0d2	0	0	0	0	0	0	3.5624	1.15965	0	0	0	0	0	0	0	0	0	0	0	0	0	0	0	0	0	0
Atp6v1g1	0	0	0	0	0	0	0	0	0	0	0	1.34609	0	0	0	0	0	0	0	0	0	0	0	0	0	0
Atp8a1	0	0	3.17301	2.57232	0	0	0	0	0	0	1.3407	1.30749	0	0	0	0	0	0	0	0	0	0	0	0	0	0
Atp9a	0	0	0	0	0	0	0	0	0	0	0	0	0	1.02662	0	0	0	0	0	0	0	0	0	0	0	0
AU020206	0	0	4.00001	3.49697	0	4.70266	4.32625	7.04834	6.18556	3.79949	6.04621	5.03943	0	4.07177	0	3.85927	7.0535	4.50045	0	0	5.13416	2.93018	0	0	0	0
AW112010	0	6.21239	7.76995	8.5123	0	5.72736	7.99852	8.12628	6.82806	8.48145	5.89573	7.12886	5.95416	6.60298	6.21111	7.50773	6.96841	6.06684	4.63201	3.52389	3.83707	6.29955	0	0	0	0
Azin2	0	0	1.92027	1.33238	0	0	0	0	0	0	0	0	0	0	0	0	0	0	0	0	0	0	0	0	0	0
B2m	5.00883	5.93151	4.54762	4.83272	3.92396	4.63964	4.66509	5.48505	4.53797	5.52264	5.07547	5.71085	4.17982	5.07103	4.33247	5.92273	4.5434	5.05395	1.84354	2.22872	2.92331	3.76993	0	4.42023	0	4.49611
B3gnt7	0	0	0	0	0	0	0	0	0	0	0	0	0	2.75981	0	0	0	0	0	0	0	0	0	0	0	0
B4galnt1	0	0	0	0	0	0	1.11889	0	0	0	0	0	0	0	0	0	0	0	0	0	0	0	0	0	0	0
B4galt1	0	0	1.42969	0	0	0	1.00982	0	0	0	0	0	0	0	0	0	0	0	0	0	0	0	0	0	0	0
B4galt3	0	0	1.15039	0	0	0	0	0	0	0	0	0	0	0	0	0	0	0	0	0	0	0	0	0	0	0
B4galt5	0	0	1.02493	0	0	0	0	0	0	0	0	0	0	0	0	0	0	0	0	1.18586	0	1.81015	0	0	0	0
Bag2	0	0	1.42687	0	0	0	0	0	0	0	0	0	0	0	0	0	0	0	0	0	0	0	0	0	0	0
Bak1	0	0	2.28175	0	0	0	1.61243	0	0	0	0	0	0	3.21736	0	0	0	0	0	0	0	0	0	0	0	0
Banf1	0	0	1.24401	1.51204	0	0	0	0	0	0	0	0	0	1.75248	0	0	0	0	0	0	0	0	0	0	0	0
Batf2	0	0	6.15422	0	0	0	5.25806	0	5.14329	0	6.30689	0	6.15337	3.60495	0	0	0	0	0	2.36539	0	0	0	0	0	0
Bax	0	0	1.05817	1.1167	0	0	1.09894	0	0	0	0	0	0	1.0926	0	0	0	0	0	0	0	0	0	0	0	0
Baz1a	0	0	0	0	0	0	1.37556	1.11322	0	0	0	0	0	0	0	0	0	0	0	0	0	0	0	0	0	0
Bbs12	0	0	1.4227	1.07842	0	0	0	0	0	0	0	0	0	0	0	0	0	0	0	0	0	0	0	0	0	0
BC005561	0	0	0	0	0	0	0	0	1.05888	0	0	0	0	0	0	0	0	0	0	0	0	0	0	0	0	0
Bcam	0	0	2.54343	1.51311	0	0	0	0	0	0	0	0	0	0	0	0	0	0	0	0	0	0	0	0	0	0
Bcar3	0	0	0	0	0	0	0	0	0	0	0	0	0	0	0	0	0	0	0	1.65899	0	0	0	0	0	0
Bcat1	0	0	1.26671	1.03323	0	0	0	0	0	0	0	0	0	0	0	0	0	0	0	0	0	0	0	0	0	0
Bcl10	0	0	1.59833	0	0	0	0	0	0	0	0	0	0	0	0	0	0	0	0	0	0	0	0	0	0	0
Bcl2l1	0	0	1.2976	0	0	0	0	0	0	0	0	0	0	0	0	0	0	0	0	0	0	0	0	0	0	0
Bcl3	0	0	3.48768	2.20525	0	0	1.75764	0	0	0	0	0	0	0	0	0	0	0	0	2.37214	0	0	0	0	0	0
Bdkrb2	0	0	0	0	0	0	0	0	2.84963	0	0	0	0	0	0	0	0	0	0	0	0	0	0	0	0	0
Bgn	0	0	0	0	0	0	0	0	0	0	0	0	0	3.35839	0	0	0	0	0	0	0	1.70982	0	0	0	0
Bhlhe40	0	0	0	0	0	0	0	0	0	0	0	0	0	1.69878	0	0	0	0	0	0	0	0	0	0	0	0
Birc2	0	0	1.26684	0	0	0	1.04432	0	1.4185	0	0	0	0	0	0	0	0	0	0	0	0	0	0	0	0	0
Birc3	0	0	2.89428	1.9999	0	0	1.5428	0	2.43583	1.82228	1.91657	0	0	0	0	0	0	0	0	1.3786	0	0	0	0	0	0
Bmyc	0	0	0	0	0	0	2.11249	0	0	0	0	0	0	0	0	0	0	0	0	0	0	0	0	0	0	0
Bnc2	0	0	0	0	0	0	2.71729	0	0	0	0	0	0	0	0	0	0	0	0	0	0	0	0	0	0	0
Bnip3	0	0	0	0	0	0	0	0	0	0	0	0	0	2.01119	0	0	0	0	0	0	0	0	0	0	0	0
Brip1	0	0	2.35164	2.96548	0	0	0	0	0	0	0	0	0	0	0	0	0	0	0	0	0	0	0	0	0	0
Bspry	0	0	2.92315	1.97742	0	0	0	0	0	0	0	0	0	0	0	0	0	0	0	0	0	0	0	0	0	0
Bst2	4.33321	4.56998	4.85828	4.83243	0	4.59183	3.73644	3.77066	4.55856	4.37201	5.03889	3.8891	3.26108	4.09362	5.85913	3.67324	6.35409	3.33207	0	1.02345	0	2.70843	0	0	0	4.99901
Btg1	0	0	2.9136	1.60978	0	0	1.09958	0	0	0	0	0	0	0	0	0	0	0	0	0	0	0	0	0	0	0
Btg2	0	0	2.72867	0	0	0	0	0	0	0	0	0	0	0	0	0	0	0	0	0	0	0	0	0	0	0
Btg3	0	0	1.5578	0	0	0	1.44098	0	0	0	0	0	0	0	0	0	0	0	0	0	0	0	0	0	0	0
C130026I21Rik	0	0	2.74272	1.09617	0	0	0	0	0	0	0	0	0	0	0	0	3.39287	0	0	0	0	0	0	0	0	0
C130074G19Rik	0	0	0	0	0	0	0	0	0	0	0	0	0	1.83032	0	0	0	0	0	0	0	0	0	0	0	0
C1qa	0	0	6.12751	5.74153	0	5.40336	4.46584	5.50819	4.68213	5.76787	4.43912	5.7285	0	6.7483	0	6.44252	0	5.90125	0	4.78064	0	3.38003	0	0	0	0
C1qb	0	0	5.24802	6.3464	0	6.67837	4.82178	5.94745	5.45922	5.31583	4.68216	6.46458	0	5.66303	0	0	0	0	0	4.8435	0	3.18995	0	0	0	0
C1qc	0	0	5.49681	0	0	0	5.08039	0	0	4.60621	0	0	0	0	0	0	0	0	0	4.04617	0	6.27708	0	0	0	0
C1ra	0	0	4.31299	4.08421	0	0	0	0	0	0	0	0	0	0	0	0	0	0	0	3.75932	0	0	0	0	0	0
C1s1	0	0	6.35427	5.06544	0	0	0	0	0	0	0	0	0	0	0	0	0	0	0	3.69528	0	1.84974	0	0	0	0
C1s2	0	0	0	5.31396	0	0	0	0	0	0	0	0	0	0	0	0	0	0	0	0	0	2.4065	0	0	0	0
C230088H06Rik	0	0	2.48058	0	0	0	2.12081	0	2.85464	0	0	0	0	0	0	0	0	0	0	0	0	0	0	0	0	0
C3	0	0	4.92666	2.64285	0	3.63198	4.96681	4.19873	3.19347	3.32711	5.5375	3.03956	0	4.80296	0	0	0	3.2342	0	3.79297	5.30515	6.299	0	0	0	2.83111
C4b	0	0	5.83022	3.65883	0	4.41152	5.11289	3.95155	0	6.85163	0	3.78361	0	4.36135	0	5.44838	0	0	0	3.31196	0	5.79354	0	0	0	0
C77080	0	0	1.03845	0	0	0	0	0	0	0	0	0	0	0	0	0	0	0	0	0	0	0	0	0	0	0
Cacna1d	0	0	1.02448	0	0	0	0	0	0	0	0	0	0	0	0	0	0	0	0	0	0	0	0	0	0	0
Cacna1h	0	0	0	0	0	0	6.45698	0	5.36987	0	0	0	0	0	0	0	0	0	0	0	0	0	0	0	0	0
Cacna2d3	0	0	1.83996	0	0	0	1.25903	0	0	0	0	0	0	0	0	0	0	0	0	0	0	0	0	0	0	0
Cacnb4	0	0	2.26997	0	0	0	0	0	0	0	0	0	0	0	0	0	0	0	0	0	0	0	0	0	0	0
Cacybp	0	0	1.16535	0	0	0	0	0	0	0	0	0	0	0	0	0	0	0	0	0	0	0	0	0	0	0
Cadps2	0	0	3.0369	1.98103	0	1.69117	1.02555	0	0	0	0	0	0	0	0	0	0	0	0	0	0	0	0	0	0	0
Calm1	0	0	1.11725	1.33674	0	0	0	0	0	1.41912	1.05118	1.14072	0	0	0	0	0	0	0	0	0	0	0	0	0	0
Calr	0	1.33645	0	1.11862	0	1.04065	0	1.20506	0	1.88413	1.53581	1.88903	0	2.20088	0	1.5472	0	0	0	0	0	1.22755	0	0	0	0
Calu	0	0	0	0	0	0	0	0	0	0	0	0	0	0	0	0	0	0	0	1.06448	0	1.06724	0	0	0	0
Camk2b	0	0	5.29204	0	0	0	3.96268	0	4.38925	0	4.51825	0	0	0	2.4705	0	3.73724	0	0	0	0	0	0	0	0	0
Camk2d	0	0	1.16058	0	0	0	0	0	0	0	0	0	0	0	0	0	0	0	1.33154	0	0	0	0	0	0	0
Camkk2	0	0	0	0	0	0	1.54938	0	0	0	0	0	0	0	0	0	0	0	0	0	0	0	0	0	0	0
Capg	0	0	0	0	0	0	1.9506	1.27331	0	0	0	0	0	0	0	0	0	0	0	1.86134	0	0	0	0	0	0
Capn1	0	0	1.56408	1.30894	0	0	0	0	0	0	0	0	0	0	0	0	0	0	0	0	0	0	0	0	0	0
Capn2	0	0	1.05321	0	0	0	0	0	0	0	0	0	0	0	0	0	0	0	0	0	0	0	0	0	0	0
Capn5	0	0	0	0	0	0	1.93879	0	0	0	1.6495	0	0	0	0	0	0	0	0	0	0	0	0	0	0	0
Capns1	0	0	1.15318	1.43602	0	0	0	0	0	0	0	1.09323	0	1.04008	0	0	0	0	0	0	0	1.32055	0	0	0	0
Capza2	0	0	0	0	0	0	0	0	0	0	0	0	0	0	0	0	0	0	0	1.07585	0	0	0	0	0	0
Capzb	0	0	0	0	0	0	0	0	0	0	0	0	0	0	0	0	0	0	0	1.08025	0	0	0	0	0	0
Car12	0	0	0	0	0	0	0	0	0	1.07949	0	0	0	0	0	0	0	0	0	0	0	0	0	0	0	0
Car5b	0	0	1.50782	1.17365	0	0	0	0	0	0	0	0	0	0	0	0	0	0	0	0	0	0	0	0	0	0
Card19	0	0	1.17372	0	0	0	0	0	0	0	0	0	0	0	0	0	0	0	0	0	0	0	0	0	0	0
Carhsp1	0	0	1.40651	0	0	0	0	0	0	0	0	0	0	0	0	0	0	0	0	0	0	0	0	0	0	0
Casp12	0	0	0	0	0	0	5.51408	5.21027	6.02422	0	0	0	0	0	0	0	0	0	0	1.84815	0	1.47072	0	0	0	0
Casp4	0	0	0	0	0	0	6.78316	0	6.04731	0	0	0	0	0	0	0	0	0	3.58711	2.89572	0	1.4009	0	0	0	0
Casp7	0	0	1.37041	1.10197	0	0	0	0	0	0	1.92096	0	0	1.86115	0	0	0	0	0	0	0	0	0	0	0	0
Casz1	0	0	1.23685	1.56123	0	0	0	0	0	0	0	0	0	0	0	0	0	0	0	0	0	0	0	0	0	0
Cbs	0	0	0	0	0	0	2.07015	0	0	0	0	0	0	0	0	0	0	0	0	0	0	0	0	0	0	0
Ccbe1	0	0	0	0	0	0	2.4759	0	0	0	0	0	0	0	0	0	0	0	0	0	0	0	0	0	0	0
Ccdc122	0	0	0	1.60506	0	0	0	0	0	0	0	0	0	0	0	0	0	0	0	0	0	0	0	0	0	0
Ccdc148	0	0	0	0	0	0	1.41353	0	0	0	0	0	0	0	0	0	0	0	0	0	0	0	0	0	0	0
Ccdc178	0	0	0	1.60089	0	0	0	0	0	0	0	0	0	0	0	0	0	0	0	0	0	0	0	0	0	0
Ccdc25	0	0	0	1.04228	0	0	0	0	0	0	0	0	0	0	0	0	0	0	0	0	0	0	0	0	0	0
Ccdc30	0	0	0	1.23197	0	0	0	0	0	0	0	0	0	0	0	0	0	0	0	0	0	0	0	0	0	0
Ccdc88a	0	0	1.17537	0	0	0	0	0	0	0	0	0	0	0	0	0	0	0	0	0	0	0	0	0	0	0
Ccl2	0	0	0	0	0	0	0	0	0	0	0	0	0	0	0	0	0	0	0	6.22693	0	4.2664	0	0	0	0
Ccl28	0	0	5.67483	0	0	0	0	0	0	0	0	0	0	0	0	0	0	0	0	0	0	0	0	0	0	0
Ccl5	0	0	7.85449	5.55384	0	4.73351	7.3807	5.92524	9.57774	6.12631	8.89419	6.40852	5.5987	8.18789	0	5.7342	7.74127	5.37361	3.716	6.70115	0	5.04091	0	0	0	0
Ccl8	0	0	8.12012	0	0	0	8.09227	0	5.84701	0	5.78213	0	0	8.20825	0	0	0	0	0	0	0	0	0	0	0	0
Ccnd1	0	0	0	0	0	0	0	0	0	0	0	0	0	0	0	0	0	0	0	2.53196	0	0	0	0	0	0
Ccng1	0	0	1.18619	1.16625	0	0	0	0	0	0	0	0	0	1.13036	0	0	0	0	0	0	0	0	0	0	0	0
Ccng2	0	0	1.19305	0	0	0	0	0	0	0	0	0	0	0	0	0	0	0	0	0	0	0	0	0	0	0
Ccr2	0	0	0	0	0	0	0	0	0	0	0	0	0	0	0	0	0	0	0	4.72033	0	0	0	0	0	0
Ccser1	0	0	0	0	0	0	0	0	0	0	1.03233	0	0	0	1.05697	0	0	0	0	0	0	0	0	0	0	0
Cct3	0	0	0	0	0	0	0	0	0	0	0	0	0	1.35948	0	0	0	0	0	0	0	0	0	0	0	0
Cct7	0	0	0	0	0	0	0	0	0	0	0	0	0	1.10411	0	0	0	0	0	0	0	0	0	0	0	0
Cd14	0	0	0	0	0	2.43558	0	0	0	0	0	0	0	2.02406	0	0	0	0	0	0	0	0	0	0	0	0
Cd151	0	0	1.12316	1.11427	0	0	0	0	0	0	0	0	0	0	0	0	0	0	0	0	0	0	0	0	0	0
Cd24a	0	0	2.56064	0	0	0	1.11227	0	1.56374	0	3.44833	1.55255	0	0	0	0	0	0	0	0	0	0	0	0	0	0
Cd274	6.28026	7.05479	6.95222	6.20862	0	4.71127	4.16892	5.01621	4.7406	5.39321	6.82316	5.20631	2.9573	5.42916	7.21363	6.32728	8.78375	6.59121	3.94773	3.40702	0	4.04934	0	0	0	0
Cd2ap	0	0	1.11232	0	0	0	0	0	0	0	0	0	0	0	0	0	0	0	0	0	0	0	0	0	0	0
Cd44	0	0	0	0	0	0	0	0	0	0	0	0	0	3.00422	0	0	0	0	0	3.11975	0	2.81974	0	0	0	0
Cd47	0	0	2.19678	1.72306	0	0	0	1.01701	1.44958	1.14805	1.88257	1.14046	1.24169	1.01782	0	0	1.79741	0	0	0	0	0	0	0	0	0
Cd52	0	6.10862	5.99679	6.39917	0	5.75819	5.53192	5.81626	5.35575	7.04586	7.30246	5.44265	5.10737	7.57278	0	7.79894	5.94843	7.19197	6.29814	6.63302	0	5.04134	0	0	0	0
Cd53	0	0	0	0	0	0	0	0	0	0	0	0	0	0	0	0	0	0	0	4.04189	0	0	0	0	0	0
Cd63	0	0	0	0	0	0	0	0	0	0	0	1.39658	0	1.45105	0	0	0	0	0	0	0	0	0	0	0	0
Cd68	0	0	0	0	0	0	0	0	0	0	0	0	0	2.7274	0	0	0	0	0	0	0	0	0	0	0	0
Cd74	5.29546	6.5155	5.74293	5.18243	6.87295	5.781	5.98566	5.87084	5.32212	5.51888	6.29305	6.79654	6.78618	7.57556	5.9612	6.74121	5.63763	5.84334	4.8084	4.76151	3.1055	4.86576	0	6.09213	0	6.49277
Cd82	0	0	1.26536	0	0	0	0	0	0	0	0	0	0	0	0	0	0	0	0	0	0	0	0	0	0	0
Cd9	0	0	3.25321	1.49746	0	0	1.07575	0	0	0	1.14098	0	0	0	0	0	0	0	0	0	0	0	0	0	0	0
Cdc42se2	0	0	0	0	0	0	1.01843	0	0	0	0	0	0	0	0	0	0	0	0	0	0	0	0	0	0	0
Cdh1	0	0	1.37889	1.45571	0	0	0	0	0	0	0	0	0	0	0	0	0	0	0	0	0	0	0	0	0	0
Cdh11	0	0	0	0	0	0	0	0	0	0	0	0	0	0	0	0	0	0	0	0	1.86076	0	0	0	0	0
Cdh3	0	0	0	0	0	0	1.10689	1.08007	0	0	2.25703	0	0	0	0	0	0	0	0	0	0	0	0	0	0	0
Cdh6	0	0	0	0	0	0	0	0	3.80237	0	0	0	0	0	0	0	0	0	0	0	0	0	0	0	0	0
Cdk17	0	0	1.36346	0	0	0	0	0	0	0	0	0	0	0	0	0	0	0	0	0	0	0	0	0	0	0
Cdk18	0	0	0	0	0	0	0	1.019	0	0	0	0	0	1.19612	0	0	0	0	0	0	0	0	0	0	0	0
Cdk2ap2	0	0	1.14273	0	0	0	0	0	0	0	0	0	0	1.89081	0	0	0	0	0	0	0	0	0	0	0	0
Cdk6	0	0	1.45938	0	0	0	1.30353	0	0	0	0	0	0	0	0	0	0	0	0	0	0	0	0	0	0	0
Cdkn1a	0	0	4.74752	0	0	0	0	0	0	0	0	0	0	0	0	0	0	0	0	3.20464	0	0	0	0	0	0
Cds1	0	0	1.59724	1.05255	0	0	0	0	0	0	0	0	0	0	0	0	0	0	0	0	0	0	0	0	0	0
Cebpb	0	0	2.72278	2.02284	0	0	3.03317	0	4.19627	0	4.2534	0	0	1.72317	0	0	0	0	0	1.859	0	0	0	0	0	0
Cebpd	0	0	0	0	0	0	4.70452	0	3.73154	0	0	0	0	0	0	0	2.98203	0	0	0	0	0	0	0	0	0
Cenpj	0	0	1.31869	1.33138	0	0	1.46795	1.58104	0	0	0	0	0	0	0	0	0	0	0	0	0	0	0	0	0	0
Cenpp	0	0	0	1.09617	0	0	0	0	0	0	0	0	0	0	0	0	0	0	0	0	0	0	0	0	0	0
Cep112	0	0	1.24369	1.18241	0	0	0	0	0	0	0	0	0	0	0	0	0	0	0	0	0	0	0	0	0	0
Cep170	0	0	1.80538	0	0	0	0	0	0	0	0	0	0	0	0	0	0	0	0	0	0	0	0	0	0	0
Cep85	0	0	1.2825	0	0	0	1.96438	0	2.77907	0	2.23006	0	0	0	0	0	0	0	0	0	0	0	0	0	0	0
Cerkl	0	0	0	0	0	0	1.49959	0	3.45503	0	0	0	0	0	0	0	0	0	0	0	0	0	0	0	0	0
Cers6	0	0	0	0	0	0	0	0	0	0	0	0	0	0	0	0	0	0	0	0	0	1.58023	0	0	0	0
Cfap65	0	0	1.21421	1.68543	0	0	0	0	0	0	0	0	0	0	0	0	0	0	0	0	0	0	0	0	0	0
Cfb	0	0	0	0	0	0	0	0	0	0	0	0	0	2.34379	0	0	0	0	0	0	0	0	0	0	0	0
Cfl1	0	0	1.3913	1.43755	0	0	0	1.24446	1.69171	0	0	1.72068	0	1.94682	0	0	0	0	0	0	0	1.57487	0	0	0	0
Cftr	0	0	1.28873	0	0	0	0	0	0	0	0	0	0	0	0	0	0	0	0	0	0	0	0	0	0	0
Ch25h	0	0	0	0	0	0	0	0	0	0	0	0	0	0	0	0	0	0	0	3.92706	0	0	0	0	0	0
Chd9	1.34695	0	3.54877	0	1.83267	0	3.45421	0	3.60774	0	2.80499	0	1.14466	0	2.23506	0	2.29784	0	1.38688	0	0	0	0	0	0	0
Chmp2a	0	0	0	0	0	0	0	0	0	0	0	0	0	1.0039	0	0	0	0	0	0	0	0	0	0	0	0
Chrnb1	0	0	0	0	0	0	1.57809	0	0	0	0	0	0	0	0	0	0	0	0	0	0	0	0	0	0	0
Ciita	0	0	5.32719	5.89047	0	2.96954	3.52151	3.07855	6.03178	0	0	4.18719	3.80525	4.41219	0	0	0	0	3.14851	4.30247	0	4.51607	0	0	0	4.68724
Ckap4	0	0	0	0	0	0	0	0	0	0	0	0	0	0	0	0	0	0	0	0	0	2.59072	0	0	0	0
Ckb	0	0	0	0	0	0	0	0	0	0	0	0	0	0	0	0	0	0	0	0	0	1.48422	0	0	0	0
Clcf1	0	0	0	0	0	0	3.10457	0	0	0	0	0	0	0	0	0	0	0	0	0	0	0	0	0	0	0
Cldn1	0	0	2.66421	1.3997	0	0	0	0	0	0	0	0	0	0	0	0	0	0	0	0	0	0	0	0	0	0
Cldn10	0	0	0	0	0	0	0	0	0	0	0	0	0	1.47386	0	0	0	0	0	0	0	0	0	0	0	0
Cldn2	0	0	0	0	0	0	0	1.70222	0	0	0	0	0	2.49299	0	0	0	0	0	0	0	0	0	0	0	0
Cldn4	0	0	0	0	0	0	0	0	0	0	0	0	0	1.38818	0	0	0	0	0	0	0	0	0	0	0	0
Cldn7	0	0	0	0	0	0	0	0	0	0	2.47616	1.13801	0	1.62303	0	0	0	0	0	0	0	0	0	0	0	0
Clec2d	0	0	2.37433	0	0	1.64694	2.12547	1.2186	2.59109	1.42661	1.47493	0	2.5348	0	2.75098	0	4.28587	2.77841	1.4354	0	0	0	0	0	0	0
Clic1	0	0	2.23769	1.73445	0	0	1.50247	1.11401	1.31797	0	2.08663	1.26041	1.10216	1.73646	0	0	1.77739	1.52092	1.49119	1.344	0	1.64417	0	0	0	0
Clic4	0	0	1.01068	0	0	0	2.18938	1.29826	1.1488	0	1.87473	1.90507	0	1.84978	0	0	0	0	1.75938	0	0	1.61822	0	0	0	0
Clint1	0	0	0	0	0	0	0	0	1.06633	0	0	0	0	0	0	0	0	0	0	0	0	0	0	0	0	0
Clta	0	0	0	0	0	0	0	0	0	0	1.39176	0	0	0	0	0	0	0	0	0	0	0	0	0	0	0
Clu	0	0	3.50735	1.13667	0	1.74065	3.39112	2.02862	2.26086	2.04842	2.57579	1.84151	5.50502	2.60464	0	0	3.47668	0	0	0	0	0	0	0	0	0
Cmc4	0	0	1.86526	0	0	0	0	0	0	0	0	0	0	0	0	0	0	0	0	0	0	0	0	0	0	0
Cmpk2	0	0	2.76986	0	0	0	0	0	0	0	0	0	0	0	0	0	0	0	0	0	0	0	0	0	0	0
Cmss1	0	0	0	0	0	0	0	0	0	0	0	0	0	0	0	1.00379	0	0	0	0	0	0	0	0	0	0
Cmtm7	0	0	0	2.46038	0	0	0	0	0	0	0	0	0	0	0	0	0	0	0	0	0	0	0	0	0	0
Cndp2	0	0	0	0	0	0	0	1.08745	0	0	0	0	0	0	0	0	0	0	0	0	0	0	0	0	0	0
Cnn2	0	0	0	0	0	0	0	0	0	0	0	0	0	0	0	0	0	0	0	1.08577	0	0	0	0	0	0
Cnn3	0	0	1.04713	0	0	0	0	0	0	0	0	0	0	0	0	0	0	0	0	0	0	1.61159	0	0	0	0
Cnot6	0	0	1.09329	0	0	0	0	0	0	0	1.33989	0	0	0	0	0	0	1.07614	0	0	0	1.1263	0	0	0	1.58609
Cntn5	0	0	0	0	0	0	0	0	2.17181	0	0	0	0	0	0	0	0	0	0	0	0	0	0	0	0	0
Cobl	0	0	1.1674	0	0	0	0	0	0	0	0	0	0	0	0	0	0	0	0	0	0	0	0	0	0	0
Col12a1	0	0	0	0	0	0	0	0	0	0	0	0	0	0	0	0	0	0	0	0	0	2.08888	0	0	0	0
Col18a1	0	1.2808	2.51268	1.32728	0	0	2.10974	1.02332	1.5719	1.16858	1.04835	0	0	0	0	0	0	0	0	0	0	0	0	0	0	0
Col1a1	0	0	0	0	0	0	0	0	0	0	0	0	0	0	0	0	0	0	0	5.03561	3.69434	3.83633	0	0	0	0
Col1a2	0	0	0	0	0	0	0	0	0	6.5032	0	0	0	3.97308	0	0	0	0	0	3.11872	2.8469	2.60982	0	0	0	0
Col3a1	0	0	0	0	0	0	0	0	0	0	0	0	0	4.37895	0	0	0	0	0	3.08631	3.21391	2.37374	0	0	0	0
Col4a1	0	0	0	0	0	0	1.11807	1.05786	0	0	0	0	0	0	0	0	0	0	1.64561	1.56694	0	0	0	0	0	0
Col4a2	0	0	0	0	0	0	0	0	0	0	0	0	0	0	0	0	0	0	2.13968	1.28699	0	0	0	0	0	0
Col5a1	0	0	0	0	0	0	0	0	0	0	0	0	0	0	0	0	0	0	0	0	0	1.66089	0	0	0	0
Col5a2	0	0	0	0	0	0	0	0	1.81919	3.43211	0	0	0	0	0	0	0	0	0	0	3.21817	2.54457	0	0	0	0
Coq8b	0	0	0	0	0	0	0	0	1.43271	0	0	0	0	0	0	0	0	0	0	0	0	0	0	0	0	0
Coro1a	0	0	6.29191	0	0	0	4.91414	0	0	6.25381	0	0	0	6.50267	0	0	0	0	0	5.69627	0	5.63097	0	0	0	0
Coro1b	0	0	1.14477	0	0	0	0	0	0	0	0	0	0	0	0	0	0	0	0	0	0	0	0	0	0	0
Coro1c	0	0	1.22054	1.18308	0	0	0	0	0	0	0	0	0	0	0	0	0	0	0	0	0	0	0	0	0	0
Coro2a	0	0	0	0	0	0	0	0	0	0	0	0	0	2.82207	0	0	0	0	0	0	0	0	0	0	0	0
Coro2b	0	0	3.22662	0	0	0	0	0	0	0	0	0	0	0	0	0	0	0	0	0	0	0	0	0	0	0
Cotl1	0	0	0	0	0	0	0	1.89968	0	0	0	0	0	0	0	0	0	0	0	0	0	0	0	0	0	0
Cp	0	0	3.60613	1.50043	0	1.54511	3.27686	1.68435	4.15541	0	5.23709	3.75146	0	0	0	0	0	2.83015	0	0	0	0	0	0	0	0
Cpe	0	0	1.28034	0	0	0	0	0	0	0	0	0	0	0	0	0	0	0	0	0	0	0	0	0	0	0
Creb3	0	0	1.60819	1.37119	0	0	0	0	0	0	0	0	0	0	0	0	0	0	0	0	0	0	0	0	0	0
Creb5	0	0	4.2823	1.86503	0	0	0	0	0	0	6.12566	0	0	0	0	0	0	0	0	0	0	0	0	0	0	0
Crim1	0	1.0088	0	0	0	0	0	0	0	0	0	0	0	0	0	0	0	0	0	0	0	0	0	0	0	0
Crip1	0	0	0	0	0	0	0	0	0	0	0	0	0	0	0	0	0	0	0	0	0	1.2575	0	0	0	0
Crlf1	0	0	0	0	0	0	0	0	0	0	0	0	0	0	0	0	0	0	0	0	0	6.47147	0	0	0	0
Cryab	0	0	1.34752	0	0	0	0	0	0	0	1.71333	1.72361	0	0	0	0	0	0	0	0	0	0	0	0	0	0
Crybg1	0	0	1.57029	1.21533	0	0	1.45581	0	0	0	0	0	0	0	0	0	0	0	0	0	0	0	0	0	0	0
Csf1	0	0	6.25916	4.02944	0	2.6177	2.48744	0	0	0	0	4.0648	0	2.13612	0	0	0	0	0	0	0	1.96933	0	0	0	0
Csf2ra	0	0	0	0	0	0	0	0	3.29547	0	0	0	0	0	0	0	0	0	0	0	0	0	0	0	0	0
Csmd1	0	0	0	0	0	0	0	0	0	0	0	0	0	0	0	0	0	0	0	0	0	1.60341	0	0	0	0
Csrp1	0	0	0	0	0	0	1.93076	1.741	1.51451	0	2.38571	1.49352	1.51066	1.67221	0	0	0	0	0	0	0	1.45505	0	0	0	0
Cst3	0	0	1.85158	1.32739	0	0	0	0	1.20582	0	1.21044	0	0	0	0	0	0	0	0	0	0	0	0	0	0	0
Cstb	0	0	2.56717	2.33375	0	0	1.62447	1.53496	1.82861	1.6739	2.04418	2.39316	0	1.76293	0	0	0	0	0	1.79471	0	2.61504	0	0	0	0
Ctgf	0	0	0	0	0	0	3.4859	0	0	0	0	0	3.32433	1.79491	0	0	0	0	0	0	0	0	0	0	0	0
Ctla4	0	0	1.05911	1.28778	0	0	1.11653	1.16743	0	0	0	0	0	1.26776	0	0	0	0	0	0	0	0	0	0	0	0
Ctnnd2	0	0	0	0	0	0	2.3833	0	0	0	0	0	0	0	0	0	0	0	0	0	0	0	0	0	0	0
Ctps	0	0	0	1.52008	0	0	2.10431	1.14976	4.69453	0	4.35542	0	0	0	0	0	0	0	0	2.35402	0	0	0	0	0	0
Ctsb	0	0	0	0	0	1.23675	0	0	0	0	0	1.12167	0	1.36362	0	0	0	0	0	1.08592	0	1.17885	0	0	0	0
Ctsc	0	0	4.61866	4.30807	0	0	1.54377	0	1.45868	0	4.01451	2.27894	0	2.70514	0	0	0	0	0	5.7475	0	3.36211	0	0	0	0
Ctse	0	0	3.45875	0	0	0	0	0	3.03635	0	3.67615	0	0	0	0	0	0	0	0	0	0	0	0	0	0	0
Ctsl	0	0	0	0	0	0	0	1.35578	0	0	0	0	0	1.42866	0	0	0	0	0	0	0	0	0	0	0	0
Ctso	0	0	0	1.20769	0	0	0	0	1.58922	0	0	0	0	0	0	0	0	0	0	0	0	0	0	0	0	0
Ctss	0	0	5.4753	5.46926	0	0	5.10672	4.88057	5.06805	5.23014	6.36382	5.74104	4.4918	4.96375	0	5.9383	0	0	0	4.66409	0	3.69084	0	0	0	0
Ctsz	0	0	0	0	0	0	1.22945	1.43276	0	0	0	1.96562	0	1.58745	0	0	0	0	0	0	0	0	0	0	0	0
Cttn	0	0	0	0	0	0	1.28592	0	1.26342	0	1.99449	0	0	0	0	0	0	0	0	0	0	0	0	0	0	0
Cttnbp2nl	0	0	1.64136	1.37705	0	0	0	0	0	0	0	0	0	0	0	0	0	0	0	0	0	0	0	0	0	0
Cuedc1	0	0	1.31636	1.34181	0	0	0	0	0	0	0	0	0	0	0	0	0	0	0	0	0	0	0	0	0	0
Cx3cl1	0	0	0	0	0	0	1.202	1.13833	0	0	0	0	0	0	0	0	0	0	0	0	0	0	0	0	0	0
Cxadr	0	0	1.41305	0	0	0	0	0	0	0	0	0	0	0	0	0	1.68173	0	0	0	0	0	0	0	0	0
Cxcl1	0	0	6.98396	0	0	0	0	0	0	0	0	0	0	0	0	0	0	0	0	0	0	0	0	0	0	0
Cxcl10	0	6.62554	5.98976	6.79922	0	6.05068	5.4342	6.49829	8.60446	8.20426	8.50328	8.92915	3.23693	8.97186	6.67851	8.35412	7.96789	7.93093	8.27556	9.39516	7.93274	8.41816	0	0	0	8.11671
Cxcl16	0	0	1.80956	0	0	0	1.93979	1.57711	0	0	3.7136	2.51175	0	1.40792	0	0	0	0	0	2.04317	0	0	0	0	0	0
Cxcl17	0	0	0	0	0	0	0	0	3.51684	0	3.61154	0	0	0	0	0	0	0	0	0	0	0	0	0	0	0
Cxcl9	0	0	6.72616	11.3981	0	6.49847	9.0505	6.70313	7.61863	7.33927	6.86052	7.3125	5.77646	8.04169	0	6.2025	6.13469	6.12755	7.82463	9.9155	3.76395	10.0037	0	0	0	0
Cyb561	0	0	1.07973	1.58212	0	0	0	0	0	0	0	0	0	0	0	0	0	0	0	0	0	0	0	0	0	0
Cyb5r3	0	0	0	1.11666	0	0	0	0	0	0	0	2.20615	0	1.00677	0	0	0	0	0	0	0	0	0	0	0	0
Cyba	0	0	0	0	0	0	0	1.35115	0	1.45313	0	1.6186	0	1.85274	0	2.12474	0	0	0	1.03263	0	1.36878	0	0	0	0
Cybb	0	0	0	0	0	0	0	0	0	0	0	0	0	0	0	0	0	0	0	4.03355	0	4.68359	0	0	0	0
Cyp2j13	0	0	1.05434	0	0	0	0	0	0	0	0	0	0	0	0	0	0	0	0	0	0	0	0	0	0	0
Cyp2j5	0	0	0	0	0	0	0	0	0	0	0	0	0	1.5179	0	0	0	0	0	0	0	0	0	0	0	0
Cyp7b1	0	0	0	0	0	0	0	0	0	0	2.64038	0	0	0	0	0	0	0	0	0	0	0	0	0	0	0
Cyr61	0	0	1.08355	0	0	0	0	0	0	0	0	2.73337	0	2.3329	0	0	0	0	0	2.55083	0	0	0	0	0	0
Cyth3	0	0	1.19074	0	0	0	0	0	0	0	0	0	0	0	0	0	0	0	0	0	0	0	0	0	0	0
Cytip	0	0	2.55149	1.14543	0	0	0	0	0	0	0	0	0	0	0	0	0	0	0	0	0	0	0	0	0	0
D030045P18Rik	0	0	4.33927	0	0	0	0	0	0	0	0	0	0	0	0	0	0	0	0	0	0	0	0	0	0	0
D430041D05Rik	0	0	0	0	0	0	2.49129	0	4.20522	0	3.95263	0	0	0	0	0	0	0	0	0	0	0	0	0	0	0
D8Ertd738e	0	0	0	1.04073	0	0	0	0	0	0	0	0	0	0	0	0	0	0	0	0	0	0	0	0	0	0
D930048N14Rik	0	0	1.0434	0	0	0	0	0	0	0	0	0	0	0	0	0	0	0	0	0	0	0	0	0	0	0
Dapk1	0	0	0	0	0	0	0	0	0	0	0	0	0	1.29752	0	0	0	0	0	0	0	0	0	0	0	0
Dapp1	0	0	0	0	0	0	2.14037	0	0	0	0	0	0	0	0	0	0	0	0	0	0	0	0	0	0	0
Dazap2	0	0	0	0	0	0	0	0	0	0	0	0	0	1.25702	0	0	0	0	0	0	0	0	0	0	0	0
Dbi	0	0	0	1.12185	0	1.25393	0	0	0	0	0	1.26946	0	1.49219	0	1.21755	0	1.28318	0	0	0	1.03151	0	0	0	0
Dbnl	0	0	1.37629	1.46416	0	0	0	0	0	0	0	0	0	0	0	0	0	0	0	0	0	0	0	0	0	0
Dcdc2a	0	0	2.43022	1.78777	0	1.55449	4.32483	2.89206	4.02417	0	6.16842	0	0	1.01438	0	0	0	0	0	2.76737	0	0	0	0	0	0
Dclk1	0	0	0	0	0	0	0	0	0	0	0	0	0	0	0	0	0	0	0	0	4.09958	3.11953	0	0	0	0
Dcn	0	0	0	0	0	0	0	0	0	0	0	0	0	0	0	0	0	0	0	0	0	1.42759	0	0	0	0
Dcp2	0	0	1.00497	0	0	0	0	0	0	0	0	0	0	0	0	0	0	0	0	0	0	0	0	0	0	0
Ddit3	0	0	0	0	0	0	0	0	0	0	0	0	0	2.60861	0	0	0	0	0	0	0	0	0	0	0	0
Ddit4	0	0	0	0	0	0	2.17221	0	0	0	0	0	0	0	0	0	0	0	0	0	0	0	0	0	0	0
Ddit4l	0	0	0	0	0	0	0	0	0	0	1.63789	0	0	0	0	0	0	0	0	0	0	0	0	0	0	0
Ddx58	0	0	1.69169	1.75097	0	0	2.38646	2.52207	2.59369	1.87447	2.3227	1.34642	0	0	0	1.84956	2.45253	2.07762	0	0	0	0	0	0	0	0
Ddx60	0	0	0	0	0	0	2.77804	4.23063	3.39754	4.22249	3.15279	4.13565	0	3.85672	0	5.37403	0	6.93604	0	0	0	0	0	0	0	0
Defb1	0	0	1.45796	0	0	0	2.2226	0	0	0	0	0	0	0	0	0	3.56806	0	0	0	0	0	0	0	0	0
Desi1	0	0	0	0	0	0	1.25035	0	0	0	1.33091	0	1.36896	0	0	1.39499	2.00838	2.44247	0	0	0	0	0	0	0	0
Dexi	0	0	2.34655	2.0029	0	0	0	0	0	0	0	0	0	0	0	0	0	0	0	1.48595	0	0	0	0	0	0
Dgkg	0	0	1.49628	1.04349	0	0	0	0	0	0	0	0	0	0	0	0	0	0	0	0	0	0	0	0	0	0
Dgkh	0	0	0	0	0	0	1.73381	0	0	0	0	0	0	0	0	0	0	0	0	0	0	0	0	0	0	0
Diaph3	0	0	0	0	0	0	0	0	0	0	0	0	0	0	0	0	0	0	0	2.83864	0	0	0	0	0	0
Dkc1	0	0	1.36362	0	0	0	0	0	0	0	0	0	0	0	0	0	0	0	0	0	0	0	0	0	0	0
Dlgap4	0	0	1.71355	0	0	0	0	0	0	0	0	0	0	0	0	0	0	0	0	0	0	0	0	0	0	0
Dnah2	0	0	0	1.24829	0	0	0	0	0	0	0	0	0	0	0	0	0	0	0	0	0	0	0	0	0	0
Dnajb1	0	0	0	0	0	0	0	0	0	0	0	0	0	2.4187	0	0	0	0	0	0	0	0	0	0	0	0
Dnm3	0	0	2.39073	2.15909	0	0	0	0	0	0	0	0	0	0	0	0	0	0	0	0	0	0	0	0	0	0
Dnmt1	0	0	0	1.03199	0	0	0	0	0	0	0	0	0	0	0	0	0	0	0	1.80365	0	0	0	0	0	0
Doc2g	0	0	2.28478	0	0	0	0	0	0	0	0	0	0	0	0	0	0	0	0	0	0	0	0	0	0	0
Dock10	0	0	0	0	0	0	0	0	2.28316	1.69193	0	0	0	0	0	0	0	0	0	3.69919	0	0	0	0	0	0
Dock2	0	0	0	0	0	0	0	0	0	0	0	0	0	0	0	0	0	0	0	5.61918	0	5.87119	0	0	0	0
Dock5	0	0	0	0	0	0	1.15773	0	0	0	1.68324	1.94605	0	0	0	0	0	0	0	0	0	0	0	0	0	0
Dph3	0	0	1.04016	0	0	0	0	0	0	0	0	0	0	0	0	0	0	0	0	0	0	0	0	0	0	0
Dpysl3	0	0	0	1.80566	0	0	0	0	0	0	0	0	0	0	0	0	0	0	0	0	0	0	0	0	0	0
Dram1	0	0	0	0	0	0	0	0	0	0	0	0	0	0	0	0	0	0	0	0	0	1.93845	0	0	0	0
Dsg2	0	0	1.65128	0	0	0	0	0	0	0	0	0	0	0	0	0	0	0	0	0	0	0	0	0	0	0
Dtx3l	0	0	3.47728	3.34509	0	4.06442	3.32005	3.78993	5.17802	2.93227	4.81344	3.40301	2.95434	3.03845	0	3.52136	3.95654	4.15586	0	2.18643	0	2.28858	0	0	0	0
Dtx4	0	0	2.65916	1.62656	0	0	0	0	0	0	0	0	0	0	0	0	0	0	0	0	0	0	0	0	0	0
Dusp1	0	0	1.72158	0	0	0	0	0	0	0	0	0	0	0	0	0	0	0	0	0	0	0	0	0	0	0
Dusp16	0	0	0	0	0	0	0	0	0	0	1.57098	0	0	0	0	0	0	0	0	0	0	0	0	0	0	0
Dut	0	0	0	1.08068	0	0	0	0	0	0	0	0	0	0	0	0	0	0	0	0	0	0	0	0	0	0
Dync1h1	0	0	1.16373	1.00748	0	0	0	0	0	0	0	0	0	0	0	0	0	0	0	0	0	0	0	0	0	0
Dync1i2	0	0	1.09679	0	0	0	0	0	0	0	1.19977	0	0	0	0	0	0	0	0	0	0	0	0	0	0	0
Dynll1	0	0	1.93106	1.27979	0	0	1.9942	1.32685	1.79883	1.64081	1.73096	1.15058	0	1.04077	0	0	0	0	0	0	0	0	0	0	0	0
Dynlrb1	0	0	0	0	0	0	0	0	0	0	0	0	0	1.38064	0	0	0	0	0	0	0	0	0	0	0	0
Dysf	0	0	4.93513	2.95802	0	1.36252	1.67326	1.1198	2.86498	1.88161	3.92044	1.99336	0	0	0	0	0	0	0	0	0	0	0	0	0	0
E130307A14Rik	0	0	1.01806	0	0	0	0	0	0	0	0	0	0	0	0	0	0	0	0	0	0	0	0	0	0	0
E2f3	0	0	0	1.30427	0	0	1.07036	0	0	0	0	0	0	0	0	0	0	0	0	0	0	0	0	0	0	0
E530011L22Rik	0	0	1.54011	0	0	0	0	0	0	0	0	0	0	0	0	0	0	0	0	0	0	0	0	0	0	0
Eda	0	0	2.23205	1.68475	0	0	1.35026	0	0	0	0	0	0	0	0	0	0	0	0	0	0	0	0	0	0	0
Eef1a1	0	0	1.04175	0	0	0	0	1.02151	0	0	1.2904	0	1.16294	0	0	0	1.13029	0	0	0	0	1.31292	0	0	0	0
Eef1b2	0	0	1.26323	1.104	0	0	0	0	0	0	0	0	0	0	0	0	0	0	0	0	0	0	0	0	0	0
Eef2	0	0	0	0	0	0	0	0	0	0	0	0	1.35044	0	0	0	0	0	0	0	0	0	0	0	0	0
Efcab5	0	0	0	0	0	0	1.36432	0	0	0	0	0	0	0	0	0	0	0	0	0	0	0	0	0	0	0
Efemp1	0	0	0	0	0	0	0	0	0	1.6064	0	0	0	0	0	0	0	0	0	0	0	0	0	0	0	0
Efhd2	0	0	2.28817	2.22075	0	0	1.66796	2.17157	0	0	0	0	0	1.98212	0	0	0	0	0	2.34975	0	2.72029	0	0	0	0
Efna5	0	0	0	0	0	0	0	0	0	0	0	0	1.06463	0	0	0	0	0	0	0	0	0	0	0	0	0
Egfros	0	0	2.33966	0	0	0	0	0	0	0	0	0	0	0	0	0	0	0	0	0	0	0	0	0	0	0
Egln1	0	0	0	0	0	0	0	0	0	0	0	0	0	1.46221	0	0	0	0	0	0	0	0	0	0	0	0
Egln3	0	0	0	0	0	0	0	0	0	0	0	0	0	3.82446	0	0	0	0	0	0	0	0	0	0	0	0
Egr1	0	0	0	0	0	0	2.23079	0	0	0	0	0	0	0	0	0	0	0	0	0	0	0	0	0	0	0
Ehd1	0	0	0	0	0	0	0	0	0	0	0	0	0	0	0	0	0	0	0	1.61587	0	0	0	0	0	0
Ehd4	0	0	0	0	0	0	2.31915	0	0	0	2.09321	0	0	0	0	0	0	0	0	0	0	0	0	0	0	0
Ehf	0	0	0	0	0	0	1.84671	0	4.31353	0	0	0	0	0	0	0	0	0	0	0	0	0	0	0	0	0
Eid1	0	0	1.2272	1.30791	0	0	0	0	0	0	0	0	0	0	0	0	0	0	0	0	0	0	0	0	0	0
Eif1	0	0	0	0	0	0	0	0	0	0	1.31407	0	0	0	0	0	0	0	0	0	0	0	0	0	0	0
Eif1a	0	0	1.87437	1.30249	0	0	1.17857	0	0	0	0	0	0	0	0	0	0	0	0	1.67709	0	0	0	0	0	0
Eif2ak2	0	0	1.35336	1.54206	0	0	0	0	0	0	0	0	0	0	0	0	0	0	0	0	0	0	0	0	0	0
Eif3b	0	0	0	0	0	0	0	0	0	0	0	0	0	1.08472	0	0	0	0	0	0	0	0	0	0	0	0
Eif4a1	0	0	0	0	0	0	0	0	0	0	0	1.00882	0	1.49672	0	0	0	0	0	1.22466	0	1.51962	0	0	0	0
Eif4ebp1	0	0	0	0	0	0	0	0	0	0	0	0	0	1.61538	0	0	0	0	0	0	0	0	0	0	0	0
Eif5a	0	0	0	1.03034	0	0	0	0	0	0	0	0	0	1.22416	0	0	0	0	0	0	0	1.51947	0	0	0	0
Eif6	0	0	1.74505	1.20421	0	0	1.70244	0	0	0	0	0	0	0	0	0	0	0	0	0	0	0	0	0	0	0
Elf3	0	0	0	0	0	0	1.62695	1.16329	0	0	0	0	2.04269	2.27752	0	0	0	0	0	0	0	0	0	0	0	0
Elf4	0	0	0	0	0	0	0	0	0	0	0	0	0	0	0	0	0	0	0	0	0	5.34392	0	0	0	0
Elmo1	0	0	0	0	0	0	0	0	0	0	0	0	0	4.40845	0	0	0	0	0	0	0	0	0	0	0	0
Elob	0	0	0	1.17049	0	0	0	0	0	0	0	1.23431	0	1.31997	0	0	0	0	0	0	0	0	0	0	0	0
Elof1	0	0	0	1.04344	0	0	0	0	0	0	0	0	0	0	0	0	0	0	0	0	0	0	0	0	0	0
Elovl7	0	0	0	0	0	0	1.05013	0	0	0	0	0	0	0	0	0	0	0	0	0	0	0	0	0	0	0
Emc6	0	0	0	0	0	0	0	0	0	0	0	0	0	1.32054	0	0	0	0	0	0	0	0	0	0	0	0
Emilin1	0	0	0	0	0	0	0	0	0	0	0	0	0	0	0	0	0	0	0	1.31534	0	0	0	0	0	0
Eml2	0	0	1.04248	0	0	0	0	0	0	0	0	0	0	0	0	0	0	0	0	0	0	0	0	0	0	0
Emp1	0	0	0	0	0	0	0	0	0	0	0	0	0	0	0	0	0	0	3.9976	1.39704	0	1.45538	0	0	0	0
Emp2	0	0	0	0	0	0	0	0	4.23324	0	5.37787	0	0	1.99636	0	0	0	0	0	0	0	0	0	0	0	0
Enc1	0	0	0	0	0	0	0	0	0	0	0	0	0	0	0	0	0	0	0	2.38753	0	0	0	0	0	0
Eno1	0	0	0	0	0	0	0	0	0	0	0	0	0	1.04903	0	0	0	0	0	0	0	0	0	0	0	0
Epb41l4a	0	0	1.01837	0	0	0	0	0	0	0	0	0	0	0	0	0	0	0	0	0	0	0	0	0	0	0
Epha7	0	0	1.1091	0	0	0	0	0	0	0	0	0	0	0	0	0	0	0	0	0	0	0	0	0	0	0
Ephb2	0	0	0	0	0	0	0	0	2.54967	0	0	0	0	0	0	0	0	0	0	0	0	0	0	0	0	0
Epsti1	0	0	4.72214	5.81445	0	4.01714	1.91313	2.27872	0	4.65408	0	2.67592	1.665	1.85399	0	2.2331	0	0	0	2.42696	0	3.06848	0	0	0	0
Erap1	0	0	2.35415	2.39181	0	1.98334	1.75113	1.94322	1.9453	2.15741	2.5779	2.72892	0	1.53336	0	2.79561	0	0	0	1.05569	0	0	0	0	0	0
Erbb4	0	0	2.35377	0	0	0	0	0	1.50822	0	0	0	0	0	0	0	0	0	0	0	0	0	0	0	0	0
Esr1	0	0	0	0	0	0	0	0	1.79937	0	0	0	0	0	0	0	0	0	0	0	0	0	0	0	0	0
Esyt2	0	0	1.1358	0	0	0	0	0	0	0	0	0	0	0	0	0	0	0	0	0	0	0	0	0	0	0
Etl4	0	0	1.20142	0	0	0	1.21014	0	0	0	0	0	0	0	0	0	0	0	0	0	0	0	0	0	0	0
Ets2	0	0	1.18539	0	0	0	0	0	0	0	0	0	0	0	0	0	0	0	0	0	0	0	0	0	0	0
Etv6	0	0	0	0	0	0	0	0	0	0	0	0	1.39271	0	0	0	1.52865	0	0	0	0	0	0	0	0	0
Eva1b	0	0	0	0	0	0	0	0	0	0	0	0	2.72709	0	0	0	0	0	0	0	0	0	0	0	0	0
Exoc3l4	0	0	0	3.40842	0	0	0	0	0	0	0	0	0	0	0	0	0	0	0	0	0	0	0	0	0	0
Exosc4	0	0	0	0	0	0	0	0	0	0	0	0	0	1.45274	0	0	0	0	0	0	0	0	0	0	0	0
Ezh2	0	0	0	1.0683	0	0	0	0	0	0	0	0	0	0	0	0	0	0	0	0	0	0	0	0	0	0
Ezr	0	0	0	0	0	0	0	0	0	0	1.53349	0	0	0	0	0	0	0	0	0	0	0	0	0	0	0
F2r	0	0	0	0	0	0	0	0	0	0	0	0	0	0	0	0	0	0	0	1.25412	0	1.74896	0	0	0	0
F2rl1	0	0	2.53914	0	0	0	0	0	0	0	0	0	0	0	0	0	0	0	0	0	0	0	0	0	0	0
F3	0	0	2.05573	1.39935	0	0	0	0	0	0	0	0	0	0	0	0	0	0	0	0	0	2.08746	0	0	0	0
F830016B08Rik	0	0	6.7798	8.2604	0	8.10508	4.30257	8.00595	9.86275	8.5135	6.98439	5.21317	0	6.01569	7.3213	7.51814	9.51553	9.16554	0	2.45278	0	2.02882	0	0	0	0
Fabp5	0	0	0	0	0	0	0	0	0	0	0	0	0	0	0	0	0	0	0	1.25141	0	0	0	0	0	0
Fabp7	0	0	3.55362	4.6928	0	0	0	0	0	0	0	0	0	0	0	0	0	0	0	0	0	0	0	0	0	0
Fam107b	0	0	0	0	0	0	0	0	0	1.04735	0	0	0	0	0	0	0	0	0	0	0	0	0	0	0	0
Fam111a	0	0	1.20861	0	0	0	0	0	0	0	0	0	0	0	0	0	0	0	0	0	0	0	0	0	0	0
Fam124a	0	0	0	0	0	0	1.08588	0	0	0	0	0	0	0	0	0	0	0	0	0	0	0	0	0	0	0
Fam129a	0	0	2.87548	1.61576	0	0	0	0	0	0	0	0	1.71368	0	0	0	0	0	0	0	0	0	0	0	0	0
Fam162a	0	0	0	0	0	0	0	0	0	0	0	0	0	1.10982	0	0	0	0	0	0	0	0	0	0	0	0
Fam163a	0	0	1.02963	1.43818	0	0	0	0	0	0	0	0	0	0	0	0	0	0	0	0	0	0	0	0	0	0
Fam196a	0	0	1.77405	0	0	0	0	0	0	0	0	0	0	0	0	0	0	0	0	0	0	0	0	0	0	0
Fam19a5	0	0	0	0	0	0	1.24606	0	0	0	0	0	0	0	0	0	0	0	0	0	0	0	0	0	0	0
Fam241a	0	0	1.94549	0	0	0	0	0	0	0	0	0	0	0	0	0	0	0	0	0	0	0	0	0	0	0
Fam26f	0	0	0	0	0	0	0	0	0	0	0	0	0	0	0	0	0	0	0	0	0	6.00415	0	0	0	0
Fam32a	0	0	1.01493	0	0	0	0	0	0	0	0	0	0	0	0	0	0	0	0	0	0	0	0	0	0	0
Fam49b	0	0	1.22121	0	0	0	0	0	0	0	0	0	0	0	0	0	0	0	0	0	0	0	0	0	0	0
Fam83g	0	0	0	1.21356	0	0	0	0	0	0	0	0	0	0	0	0	0	0	0	0	0	0	0	0	0	0
Far1	0	0	0	0	0	0	0	0	0	0	1.15128	0	0	0	0	0	0	0	0	0	0	0	0	0	0	0
Far1os	0	0	0	0	0	0	1.36179	0	0	0	0	0	0	0	0	0	0	0	0	0	0	0	0	0	0	0
Fas	0	0	2.48776	2.27059	0	0	0	0	0	0	0	0	0	0	0	0	0	0	0	0	0	0	0	0	0	0
Fat1	0	0	2.02186	1.67952	0	0	0	0	1.62009	0	1.94944	0	0	0	0	0	0	0	0	0	0	1.07646	0	0	0	0
Fau	0	0	1.17568	0	0	0	0	0	1.12508	0	1.30606	0	0	0	0	0	0	0	0	0	0	0	0	0	0	0
Fbf1	0	0	1.06898	0	0	0	0	0	0	0	0	0	0	0	0	0	0	0	0	0	0	0	0	0	0	0
Fbn1	0	0	0	0	0	0	0	0	0	0	0	0	0	0	0	0	0	0	0	0	0	1.11589	0	0	0	0
Fbxl2	0	0	1.6766	0	0	0	0	0	0	0	0	0	0	0	0	0	0	0	0	0	0	0	0	0	0	0
Fbxo6	0	0	0	0	0	0	0	0	0	0	0	0	0	2.53066	0	0	0	0	0	0	0	0	0	0	0	0
Fbxw17	0	0	2.93942	2.641	0	0	2.53264	2.24063	5.22719	2.02267	2.92998	1.67498	0	1.37055	0	0	3.01698	0	0	0	0	0	0	0	0	0
Fbxw9	0	0	1.20718	0	0	0	0	0	0	0	0	0	0	0	0	0	0	0	0	0	0	0	0	0	0	0
Fcer1g	0	0	4.28529	4.87653	0	0	3.21155	2.68456	0	0	0	2.96861	0	3.15379	0	0	0	0	0	4.53679	0	0	0	0	0	0
Fem1c	0	0	0	0	0	1.17655	0	0	0	0	0	0	0	0	0	0	0	0	0	0	0	0	0	0	0	0
Fer	0	0	0	1.04989	0	0	0	0	0	0	0	0	0	0	0	0	0	0	0	0	0	0	0	0	0	0
Fga	0	0	2.6652	0	0	0	0	0	0	0	0	0	0	0	0	0	0	0	0	0	0	0	0	0	0	0
Fgd3	0	0	0	0	0	0	1.84611	1.46894	0	0	0	0	0	0	0	0	0	0	0	0	0	0	0	0	0	0
Fgf12	0	0	0	0	0	0	0	0	0	0	3.11186	0	0	0	0	0	0	0	0	0	0	0	0	0	0	0
Fgfbp1	0	3.5916	0	0	0	0	0	0	0	0	0	0	0	0	0	0	0	0	0	0	0	0	0	0	0	0
Fgfr2	0	0	1.01989	0	0	0	0	0	0	0	0	0	0	0	0	0	0	0	0	0	0	0	0	0	0	0
Fgl2	0	0	0	0	0	0	0	0	0	0	0	0	0	0	0	0	0	0	0	3.47454	0	0	0	0	0	0
Fhl2	0	0	0	0	0	0	0	1.32306	0	0	0	0	0	0	0	0	0	0	0	0	0	0	0	0	0	0
Fhod3	0	0	1.99993	1.11689	0	0	0	0	0	0	0	0	0	0	0	0	0	0	0	0	0	0	0	0	0	0
Fkbp1a	0	0	1.64782	1.26449	0	0	0	0	0	0	0	0	0	1.10925	0	0	0	0	0	0	0	0	0	0	0	0
Fkbp5	0	0	3.14648	0	0	0	2.35767	0	1.92026	0	1.53241	0	0	0	0	0	0	0	0	0	0	0	0	0	0	0
Flna	0	0	0	0	0	0	2.70042	0	0	0	4.515	0	0	0	0	0	0	0	0	0	0	0	0	0	0	0
Flnb	0	0	0	0	0	1.00969	1.52109	0	0	0	0	0	0	0	0	0	0	0	1.47195	1.23376	0	0	0	0	0	0
Flot1	0	0	1.44491	0	0	0	1.20449	0	0	0	0	0	0	0	0	0	0	0	0	0	0	0	0	0	0	0
Flvcr1	0	0	0	0	0	0	1.25219	0	0	0	0	0	0	0	0	0	0	0	0	0	0	0	0	0	0	0
Fmn1	0	0	1.18742	0	0	0	0	0	0	0	0	0	0	0	0	0	0	0	0	0	0	1.68307	0	0	0	0
Fmnl2	0	0	2.59065	1.43119	0	0	1.0222	0	1.53767	0	1.0526	0	0	0	0	0	0	0	0	0	0	0	0	0	0	0
Fmnl3	0	0	3.60091	0	0	0	1.82977	1.03769	0	0	0	0	0	0	0	0	0	0	0	0	0	0	0	0	0	0
Folh1	0	0	2.0194	0	0	0	0	0	0	0	0	0	0	0	0	0	0	0	0	0	0	0	0	0	0	0
Fos	0	0	0	0	0	0	0	0	0	0	0	0	0	2.26144	0	0	0	0	0	0	0	0	0	0	0	0
Fosl2	0	0	2.56246	0	0	0	0	0	0	0	0	0	0	1.46286	0	0	0	0	0	0	0	0	0	0	0	0
Foxp1	0	0	0	0	0	0	0	0	0	0	0	0	0	0	0	0	0	0	0	0	0	1.1941	0	0	0	0
Frk	0	0	1.51012	1.35606	0	0	0	0	0	0	0	0	0	0	0	0	0	0	0	0	0	0	0	0	0	0
Fscn1	0	0	0	0	0	0	0	0	0	0	0	0	0	0	0	0	0	0	0	1.40938	0	0	0	0	0	0
Fsd1l	0	0	1.69745	1.53507	0	0	0	0	0	0	0	0	0	0	0	0	0	0	0	0	0	0	0	0	0	0
Fstl1	0	0	0	0	0	0	0	0	3.5491	0	0	0	0	0	0	0	0	0	0	0	2.26739	1.62761	0	0	0	0
Fth1	0	1.66101	0	1.22442	0	1.16213	0	1.1337	0	1.01795	0	1.32233	0	1.60302	0	1.31661	0	1.16206	0	0	0	0	0	0	0	1.28554
Ftl1	0	1.20274	0	0	0	0	0	0	0	0	0	1.03313	0	1.67346	0	1.33129	0	0	0	0	0	0	0	0	0	0
Ftl1-ps1	0	0	1.31899	1.11833	0	0	1.53405	1.25902	0	0	0	0	0	1.87759	0	0	0	0	0	0	0	0	0	0	0	0
Fundc2	0	0	0	0	0	0	0	0	0	0	0	0	0	1.67589	0	0	0	0	0	0	0	0	0	0	0	0
Fut2	0	0	0	0	0	0	0	0	0	0	0	0	0	3.47143	0	0	0	0	0	0	0	0	0	0	0	0
Fut8	0	0	0	0	0	0	0	0	0	0	0	0	0	1.06231	0	0	0	0	0	0	0	0	0	0	0	0
Fxyd5	0	0	5.18646	0	0	0	4.07517	0	0	0	5.37428	0	0	5.18954	0	0	0	0	2.78497	1.13975	0	0	0	0	0	0
Fyb2	0	0	1.80223	1.11817	0	0	2.87236	0	3.76836	0	0	0	0	0	0	0	0	0	0	0	0	0	0	0	0	0
G3bp2	0	0	1.31718	1.30295	0	1.38204	0	0	0	0	0	0	1.34415	1.33155	0	0	0	0	0	0	0	0	0	0	0	0
G6pdx	0	0	1.66501	0	0	0	0	0	0	0	0	0	0	0	0	0	0	0	0	0	0	0	0	0	0	0
Gab2	0	0	0	0	0	0	0	0	1.11445	0	1.86666	1.16148	0	0	0	0	0	0	1.48826	0	0	0	0	0	0	0
Gab3	0	0	3.99253	2.6043	0	0	0	0	0	0	0	0	0	0	0	0	0	0	0	0	0	0	0	0	0	0
Gabarap	0	0	0	0	0	0	0	0	0	1.22026	1.07466	0	0	0	0	0	0	0	0	0	0	1.25445	0	0	0	0
Gadd45a	0	0	2.24079	0	0	0	1.10847	0	2.73343	0	0	0	0	0	0	0	0	0	0	0	0	0	0	0	0	0
Gadd45g	0	0	2.15091	1.34078	0	0	0	0	0	0	0	0	0	0	0	0	0	0	0	0	0	0	0	0	0	0
Gadd45gip1	0	0	0	0	0	0	0	0	0	0	0	0	0	2.26278	0	0	0	0	0	0	0	0	0	0	0	0
Galnt3	0	0	0	0	0	0	2.04602	0	1.84451	0	0	0	0	0	0	0	0	0	0	0	0	0	0	0	0	0
Gas7	0	0	0	0	0	0	0	0	0	0	0	0	0	0	0	0	0	0	0	0	0	1.68327	0	0	0	0
Gbp2	7.37693	6.79955	8.15889	8.39294	7.0884	5.61444	6.49974	9.7303	7.14218	6.70246	7.87064	8.14291	7.37046	5.89283	7.55154	6.29947	8.94519	7.58549	4.85292	3.66772	7.23054	4.89074	0	0	0	5.69616
Gbp2b	0	6.11418	0	9.29304	0	6.08286	0	7.33322	0	8.43882	0	7.78266	0	7.20746	0	8.46908	0	9.22664	0	4.48769	0	6.66554	0	0	0	6.26612
Gbp3	6.83169	6.24831	5.82597	6.0151	0	4.89151	4.91582	6.03408	8.25178	6.31233	6.25508	6.59324	4.26822	5.95796	0	5.49807	6.84553	7.13677	2.78939	3.08047	0	3.91375	0	0	0	5.72103
Gbp5	0	0	6.6614	6.54414	0	6.46947	5.71989	6.63398	7.64782	5.32064	4.81694	6.99147	0	5.03509	0	5.12928	7.42398	7.58911	4.43534	4.62648	0	4.50471	0	0	0	6.53789
Gbp7	5.50067	5.19201	4.95326	4.83579	5.97385	4.97779	4.37171	5.6207	5.06285	5.57276	4.11378	6.19235	4.51101	5.48815	4.93432	5.6997	8.61085	7.23297	1.96257	2.51933	3.56105	2.36787	0	0	0	4.54526
Gbp8	8.24234	8.69285	8.62206	6.83387	0	7.46106	7.66454	5.19015	8.86349	6.22515	7.49721	5.43332	5.7177	5.01821	7.31426	5.70556	8.33135	5.54586	0	1.97578	5.48127	2.81696	0	0	0	4.46731
Gca	0	0	1.39727	1.3061	0	0	0	0	0	0	0	0	0	0	0	0	0	0	0	0	0	0	0	0	0	0
Gclc	0	0	0	0	0	0	3.22225	0	0	0	0	0	0	0	0	0	0	0	0	0	0	0	0	0	0	0
Gclm	0	0	0	0	0	0	0	0	0	0	1.23582	0	0	0	0	0	0	0	0	0	0	0	0	0	0	0
Gcnt1	0	0	0	0	0	0	0	0	0	0	0	1.36963	0	1.84135	0	0	0	0	0	0	0	0	0	0	0	0
Gda	0	0	1.05061	1.82486	0	0	0	0	0	0	0	0	0	0	0	0	0	0	0	1.37943	0	0	0	0	0	0
Gdf15	0	0	3.62792	2.18664	0	0	4.27899	1.77762	0	0	7.10519	2.67452	0	2.50393	0	0	0	0	0	0	0	0	0	0	0	0
Get4	0	0	1.01657	0	0	0	0	0	0	0	0	0	0	0	0	0	0	0	0	0	0	0	0	0	0	0
Gfer	0	0	1.27809	0	0	0	0	0	0	0	0	0	0	0	0	0	0	0	0	0	0	0	0	0	0	0
Gfpt1	0	0	1.85882	0	0	0	0	0	0	0	0	0	0	0	0	0	0	0	0	0	0	0	0	0	0	0
Gimap9	0	0	1.0649	0	0	0	0	0	0	0	0	0	0	0	0	0	0	0	0	0	0	0	0	0	0	0
Glipr2	0	0	0	0	0	0	4.54861	0	0	0	4.01579	0	0	0	0	0	0	0	0	4.34742	0	0	0	0	0	0
Glrx	0	0	1.61314	0	0	0	0	0	0	0	0	0	0	0	0	0	0	0	0	0	0	0	0	0	0	0
Gls	0	0	1.81001	0	0	0	0	0	1.44532	1.25676	0	0	0	0	0	0	0	0	0	0	0	0	0	0	0	0
Gm10036	0	0	0	1.16355	0	0	0	0	0	1.19901	0	0	0	1.1165	0	0	0	0	0	0	0	1.27574	0	0	0	0
Gm10073	0	0	1.53685	1.45454	0	0	1.23634	1.28218	1.29823	1.30826	1.99559	1.33158	0	1.3555	0	1.16245	0	1.64742	0	1.01407	0	1.67717	0	0	0	0
Gm10076	0	0	2.4436	1.07527	0	0	1.58054	1.29725	0	0	2.20784	0	0	0	0	0	0	0	0	0	0	0	0	0	0	0
Gm10260	0	0	0	0	0	0	4.93611	0	0	0	0	0	0	1.13751	0	0	0	0	0	0	0	0	0	0	0	0
Gm10320	0	0	0	0	0	0	0	0	0	0	0	0	0	1.49719	0	0	0	0	0	0	0	0	0	0	0	0
Gm10785	0	0	1.00178	0	0	0	0	0	0	0	0	0	0	0	0	0	0	0	0	0	0	0	0	0	0	0
Gm11099	0	0	1.07962	1.21739	0	0	1.43769	0	0	0	0	0	0	0	0	0	0	0	0	0	0	0	0	0	0	0
Gm11361	0	0	1.11629	0	0	0	0	0	0	0	0	0	0	1.1232	0	0	0	0	0	0	0	0	0	0	0	0
Gm11536	0	0	1.3285	0	0	0	1.18249	0	1.80243	0	0	0	0	0	0	0	0	0	0	0	0	0	0	0	0	0
Gm11808	0	0	1.16227	0	0	0	0	0	1.09709	0	1.30507	0	0	0	0	1.09652	0	1.06519	0	0	0	0	0	0	0	0
Gm12002	0	0	1.94223	0	0	0	0	0	0	0	0	0	0	0	0	0	0	0	0	0	0	0	0	0	0	0
Gm12185	4.75239	4.74822	6.91859	6.63284	0	5.54007	5.05635	5.69244	5.25679	6.7167	6.29084	7.41445	0	4.77503	5.76445	5.6413	5.70673	6.92564	0	1.20603	0	0	0	0	0	6.09109
Gm12216	0	0	5.82277	5.54002	0	4.59879	1.86996	2.36726	2.88186	2.41511	1.34217	1.36762	2.56802	2.88065	0	1.76886	0	0	0	1.03726	0	1.77055	0	0	0	0
Gm12860	0	0	0	0	0	0	3.48949	0	5.65182	0	0	0	0	0	0	0	0	0	0	0	0	0	0	0	0	0
Gm13963	0	0	2.17038	0	0	0	0	0	0	0	0	0	0	0	0	0	0	0	0	0	0	0	0	0	0	0
Gm14005	0	0	0	0	0	0	0	0	0	0	0	0	0	0	0	0	0	0	0	2.16833	0	0	0	0	0	0
Gm14820	0	0	0	1.1003	0	0	0	0	0	0	0	0	0	1.21463	0	0	0	0	0	0	0	0	0	0	0	0
Gm14964	0	0	2.50432	1.51971	0	0	0	0	0	0	0	0	0	0	0	0	0	0	0	0	0	0	0	0	0	0
Gm15283	0	0	0	0	0	0	0	0	0	0	1.98668	0	0	0	0	0	0	0	0	0	0	0	0	0	0	0
Gm15336	0	0	2.44146	0	0	0	0	0	0	0	0	0	0	0	0	0	0	0	0	0	0	0	0	0	0	0
Gm15337	0	0	1.74248	0	0	0	0	0	0	0	0	0	0	0	0	0	0	0	0	0	0	0	0	0	0	0
Gm15347	0	0	3.01206	0	0	0	3.63768	0	2.44767	0	0	0	0	0	0	0	0	0	0	0	0	0	0	0	0	0
Gm15563	0	0	1.18998	0	0	0	0	0	0	0	0	0	0	0	0	0	0	0	0	0	0	0	0	0	0	0
Gm15614	0	0	1.33997	0	0	0	1.00615	0	0	0	0	0	0	0	0	0	0	0	0	0	0	0	0	0	0	0
Gm15655	0	0	1.02234	0	0	0	0	0	0	0	0	0	0	0	0	0	0	0	0	0	0	0	0	0	0	0
Gm15716	0	0	1.77125	0	0	0	0	0	0	0	0	0	0	0	0	0	0	0	0	0	0	0	0	0	0	0
Gm15738	0	0	1.67002	0	0	0	0	0	0	0	0	0	0	0	0	0	0	0	0	0	0	0	0	0	0	0
Gm15860	0	0	0	0	0	0	1.48472	0	0	0	0	0	0	0	0	0	0	0	0	0	0	0	0	0	0	0
Gm16008	0	0	1.00712	0	0	0	0	0	0	0	0	0	0	0	0	0	0	0	0	0	0	0	0	0	0	0
Gm1604a	0	0	0	0	0	0	1.67189	0	0	0	0	0	0	0	0	0	0	0	0	0	0	0	0	0	0	0
Gm16311	0	0	1.07345	0	0	0	0	0	0	0	0	0	0	0	0	0	0	0	0	0	0	0	0	0	0	0
Gm16541	0	0	1.03009	0	0	0	0	0	0	0	0	0	0	0	0	0	0	0	0	0	0	0	0	0	0	0
Gm16552	0	0	1.19376	0	0	0	0	0	0	0	0	0	0	0	0	0	0	0	0	0	0	0	0	0	0	0
Gm16599	0	0	0	0	0	0	0	0	1.10015	0	0	0	0	0	0	0	0	0	0	0	0	0	0	0	0	0
Gm16685	0	0	2.89683	3.76692	0	4.58923	1.3244	2.32134	1.70991	3.16727	1.82893	5.21723	4.22784	4.54902	3.12211	8.43466	2.88946	6.23368	0	0	0	5.34821	0	0	0	0
Gm17227	0	0	1.33276	0	0	0	0	0	0	0	0	0	0	0	0	0	0	0	0	0	0	0	0	0	0	0
Gm19684	0	0	8.10819	0	0	0	4.36637	0	5.28672	0	4.01515	0	0	0	0	0	0	0	0	0	0	0	0	0	0	0
Gm2000	0	0	0	1.02923	0	0	0	0	0	0	0	0	0	1.0016	0	0	0	0	0	0	0	1.4491	0	0	0	0
Gm20275	0	0	1.88888	0	0	0	0	0	0	0	2.00175	0	0	0	0	0	0	0	0	0	0	0	0	0	0	0
Gm20388	0	0	0	0	0	0	0	0	0	0	1.0453	0	0	0	1.63343	0	1.10262	0	0	0	0	0	0	0	0	0
Gm20513	0	0	0	5.85671	0	0	0	0	0	0	0	0	0	0	0	0	0	0	0	0	0	0	0	0	0	0
Gm20663	0	0	8.08686	5.90892	0	0	4.38571	2.64592	7.26621	3.33488	7.04556	0	0	0	0	0	0	0	3.99332	0	0	1.91293	0	0	0	5.11668
Gm20696	0	0	5.11356	3.44455	0	0	0	1.04884	0	0	0	0	0	0	0	0	0	0	0	0	0	0	0	0	0	0
Gm21154	0	0	0	0	0	0	0	0	3.77953	0	0	0	0	0	0	0	0	0	0	0	0	0	0	0	0	0
Gm26542	0	0	0	0	0	0	1.03295	0	0	0	0	0	0	0	0	0	0	0	0	0	0	0	0	0	0	0
Gm26624	0	0	1.33483	0	0	0	1.37899	0	2.35762	0	0	0	0	0	0	0	0	0	0	0	0	0	0	0	0	0
Gm26632	0	0	2.73137	1.15042	0	0	1.07456	0	0	0	0	0	0	0	0	0	0	0	0	0	0	0	0	0	0	0
Gm26669	0	0	2.76006	0	0	0	1.72175	0	0	0	0	0	0	0	0	0	0	0	0	0	0	0	0	0	0	0
Gm26735	0	0	0	0	0	0	0	0	0	0	2.58974	0	0	0	0	0	0	0	0	0	0	0	0	0	0	0
Gm26740	0	0	0	0	0	0	0	0	0	0	0	0	0	0	0	0	0	0	0	4.72133	0	0	0	0	0	0
Gm26749	0	0	1.01853	0	0	0	0	0	0	0	0	0	0	0	0	0	0	0	0	0	0	0	0	0	0	0
Gm26804	0	0	1.17383	0	0	0	0	0	1.66622	0	1.3814	0	0	0	0	0	0	0	0	0	0	0	0	0	0	0
Gm26816	0	0	1.21166	0	0	0	0	0	0	0	0	0	0	0	0	0	0	0	0	0	0	0	0	0	0	0
Gm26827	0	0	1.98483	0	0	0	0	0	0	0	0	0	0	0	0	0	0	0	0	0	0	0	0	0	0	0
Gm26835	0	0	1.07292	0	0	0	1.13229	0	2.07235	0	0	0	0	0	0	0	0	0	0	0	0	0	0	0	0	0
Gm26836	0	0	1.18804	0	0	0	0	0	0	0	0	0	0	0	0	0	0	0	0	0	0	0	0	0	0	0
Gm26917	0	0	0	1.0384	0	0	0	1.20005	0	1.6151	0	1.27238	0	0	0	1.7186	0	1.22472	2.45082	1.6918	0	0	0	0	0	0
Gm27017	0	0	1.15812	0	0	0	0	0	0	0	0	0	0	0	0	0	0	0	0	0	0	0	0	0	0	0
Gm28068	0	0	0	1.32152	0	0	0	0	0	0	0	0	0	0	0	0	0	0	0	0	0	0	0	0	0	0
Gm28501	0	0	1.44404	0	0	0	0	0	0	0	0	0	0	0	0	0	0	0	0	0	0	0	0	0	0	0
Gm28727	0	0	1.44969	0	0	0	0	0	0	0	0	0	0	0	0	0	0	0	0	0	0	0	0	0	0	0
Gm29337	0	0	0	1.43424	0	0	0	0	0	0	0	0	0	0	0	0	0	0	0	0	0	0	0	0	0	0
Gm31036	0	0	1.33924	0	0	0	0	0	0	0	0	0	0	0	0	0	0	0	0	0	0	0	0	0	0	0
Gm31224	0	0	1.91479	0	0	0	0	0	0	0	0	0	0	0	0	0	0	0	0	0	0	0	0	0	0	0
Gm31683	0	0	0	0	0	0	1.67348	0	0	0	0	0	0	0	0	0	0	0	0	0	0	0	0	0	0	0
Gm32250	0	0	1.55905	0	0	0	0	0	0	0	0	0	0	0	0	0	0	0	0	0	0	0	0	0	0	0
Gm32857	0	0	3.23087	1.47486	0	0	0	0	4.72891	2.40967	0	0	0	0	0	0	0	0	0	0	0	0	0	0	0	0
Gm35188	0	0	1.50829	0	0	0	0	0	0	0	0	0	0	0	0	0	0	0	0	0	0	0	0	0	0	0
Gm37240	0	0	1.05618	0	0	0	0	0	0	0	0	0	0	0	0	0	0	0	0	0	0	0	0	0	0	0
Gm37768	0	0	1.07495	0	0	0	0	0	0	0	0	0	0	0	0	0	0	0	0	0	0	0	0	0	0	0
Gm39469	0	0	1.18659	0	0	0	0	0	0	0	0	0	0	0	0	0	0	0	0	0	0	0	0	0	0	0
Gm40271	0	0	1.97787	1.0097	0	0	1.3075	0	0	0	1.88583	0	0	1.19681	0	0	0	0	0	0	0	0	0	0	0	0
Gm4070	0	0	7.3864	8.06048	0	0	4.70499	0	6.97289	0	5.69828	0	0	0	0	0	0	0	0	0	0	0	0	0	0	0
Gm4117	0	0	1.67184	0	0	0	0	0	0	0	0	0	0	0	0	0	0	0	0	0	0	0	0	0	0	0
Gm42031	0	0	4.731	0	0	0	5.54096	0	3.14292	0	2.46923	0	0	0	1.83046	0	3.2049	0	0	0	0	0	0	0	0	0
Gm42418	0	0	0	0	0	0	0	0	0	0	0	0	0	1.08235	0	0	0	0	0	0	0	0	0	0	0	0
Gm42620	0	0	2.51868	0	0	0	0	0	0	0	0	0	0	0	0	0	0	0	0	0	0	0	0	0	0	0
Gm42917	0	0	3.18513	0	0	0	0	0	0	0	0	0	0	0	0	0	0	0	0	0	0	0	0	0	0	0
Gm43713	0	0	0	0	0	0	0	0	1.21303	0	0	0	0	0	0	0	0	0	0	0	0	0	0	0	0	0
Gm44148	0	0	1.68285	1.6222	0	2.45343	2.63568	1.79704	2.62419	0	3.29926	2.42094	0	0	0	0	0	5.92575	0	0	0	0	0	0	0	0
Gm44511	0	0	1.14391	0	0	0	1.31209	0	1.11188	0	0	0	0	0	0	0	0	0	0	0	0	0	0	0	0	0
Gm44686	0	0	1.51803	0	0	0	0	0	1.55059	0	0	0	0	0	0	0	0	0	0	0	0	0	0	0	0	0
Gm45871	0	0	1.77228	2.44258	0	0	0	0	0	0	0	0	0	0	0	0	0	0	0	0	0	0	0	0	0	0
Gm47071	0	0	1.25766	0	0	0	0	0	0	0	0	0	0	0	0	0	0	0	0	0	0	0	0	0	0	0
Gm47167	0	0	1.60886	0	0	0	0	0	0	0	0	0	0	0	0	0	0	0	0	0	0	0	0	0	0	0
Gm47283	0	0	3.36565	0	0	0	2.87312	0	2.58005	0	0	0	0	0	0	0	0	0	0	0	0	0	0	0	0	0
Gm47371	0	0	2.31774	0	0	0	0	0	0	0	0	0	0	0	0	0	0	0	0	0	0	0	0	0	0	0
Gm4841	0	0	7.41499	10.0672	0	7.26949	6.6576	9.24763	8.67222	8.12457	6.35266	8.20273	0	7.77154	0	7.37987	7.87154	7.92019	0	3.47768	0	4.40695	0	0	0	5.53851
Gm48678	0	0	1.20614	0	0	0	0	0	1.49732	0	0	0	0	0	0	0	0	0	0	0	0	0	0	0	0	0
Gm48749	0	0	0	0	0	0	0	0	5.79677	0	0	0	0	0	0	0	0	0	0	0	0	0	0	0	0	0
Gm49356	0	0	1.06205	0	0	0	0	0	0	0	0	0	0	0	0	0	0	0	0	0	0	0	0	0	0	0
Gm4951	6.34133	6.56915	8.54754	10.0156	0	8.40841	6.49296	7.98308	7.10182	9.0335	8.64732	6.99803	7.30246	8.16973	8.573	9.34556	9.57306	9.46391	4.20097	3.31508	0	2.59751	0	0	0	7.24122
Gm6034	0	0	3.54142	2.82891	0	0	3.38419	3.82971	3.4582	4.73974	0	5.056	0	2.70136	0	3.37775	0	2.86448	0	0	0	0	0	0	0	0
Gm7030	0	0	0	3.01323	0	0	0	3.7066	5.3833	3.18783	0	0	0	2.22683	0	0	0	0	0	2.38794	0	0	0	0	0	0
Gm7480	0	0	2.64946	0	0	0	0	0	0	0	0	0	0	0	0	0	0	0	0	0	0	0	0	0	0	0
Gm7580	0	0	3.08239	0	0	0	0	0	0	0	0	0	0	0	0	0	0	0	0	0	0	0	0	0	0	0
Gm8126	0	0	2.05449	1.79871	0	0	0	0	0	0	0	0	0	0	0	0	0	0	0	0	0	0	0	0	0	0
Gm8186	0	0	1.47571	1.11091	0	0	1.13838	1.1798	0	0	0	0	0	1.03586	0	0	0	0	0	0	0	0	0	0	0	0
Gm8439	0	0	0	0	0	0	3.74863	0	5.37327	0	5.75101	0	0	0	0	0	0	0	0	0	0	0	0	0	0	0
Gm8739	0	0	1.94331	0	0	0	0	0	0	0	0	0	0	0	0	0	0	0	0	0	0	0	0	0	0	0
Gm9493	0	0	1.27828	0	0	0	0	0	0	0	0	0	0	0	0	0	0	0	0	1.10831	0	0	0	0	0	0
Gm9844	0	0	5.08828	3.49969	0	0	3.92237	0	0	0	4.56797	2.82573	0	1.70757	0	0	0	0	0	2.36932	0	1.58307	0	0	0	0
Gm9951	0	0	2.22095	2.13598	0	0	0	0	0	0	0	0	0	0	0	0	0	0	0	0	0	0	0	0	0	0
Gmds	0	0	1.46062	1.19443	0	0	0	0	1.1513	0	0	0	0	0	0	0	0	0	0	0	0	0	0	0	0	0
Gmpr	0	0	0	1.17535	0	0	0	0	0	0	0	0	0	0	0	0	0	0	0	0	0	0	0	0	0	0
Gna13	0	0	1.77607	1.41386	0	0	0	0	0	0	0	0	0	1.34026	0	0	1.89974	0	0	0	0	0	0	0	0	0
Gnai2	0	0	1.02452	1.18853	0	0	1.32626	1.18158	0	0	1.98298	0	0	1.6422	0	0	0	0	0	0	0	0	0	0	0	0
Gng5	0	0	0	0	0	0	0	0	0	0	0	1.12716	0	1.26867	0	0	0	0	0	0	0	0	0	0	0	0
Gnl1	0	0	1.10741	0	0	0	0	0	0	0	0	0	0	0	0	0	0	0	0	0	0	0	0	0	0	0
Gpc3	0	0	0	1.9166	0	0	0	0	0	0	0	0	0	0	0	0	0	0	0	0	0	0	0	0	0	0
Gpi1	0	0	0	0	0	0	0	0	0	0	0	0	0	1.25162	0	0	0	0	0	0	0	0	0	0	0	0
Gpr39	0	0	4.20134	0	0	0	1.26033	0	0	0	0	0	0	0	0	0	0	0	0	0	0	0	0	0	0	0
Gpx1	0	0	0	0	0	0	0	0	0	0	0	1.18362	0	1.59616	0	0	0	0	0	0	0	1.09304	0	0	0	0
Gpx3	0	0	0	0	0	0	0	0	0	0	0	0	0	1.32099	0	0	0	0	0	0	0	0	0	0	0	0
Gpx4	0	0	0	0	0	0	0	0	0	0	0	0	0	1.57088	0	0	0	0	0	0	0	0	0	0	0	0
Grem2	0	0	0	0	0	0	0	0	0	0	0	0	2.57529	0	0	0	0	0	0	0	0	0	0	0	0	0
Grk5	0	0	1.74043	0	0	0	0	0	0	0	0	0	0	0	0	0	0	0	0	0	0	0	0	0	0	0
Grn	0	0	1.94142	1.29779	0	0	1.44633	0	1.69507	0	1.62743	0	0	1.5311	0	0	0	0	0	0	0	1.68343	0	0	0	0
Gsap	0	0	0	0	0	0	0	0	2.55989	0	3.84815	3.02916	0	0	0	0	0	0	0	2.72527	0	0	0	0	0	0
Gsr	0	0	1.73283	0	0	0	1.74165	0	1.67266	0	1.99572	0	0	1.02466	0	0	0	0	0	0	0	0	0	0	0	0
Gt(ROSA)26Sor	0	0	1.30413	0	0	0	0	0	0	0	0	0	0	0	0	0	0	0	0	0	0	0	0	0	0	0
Gtpbp2	0	0	1.16148	0	0	0	0	0	0	0	0	0	0	0	0	0	0	0	0	0	0	0	0	0	0	0
Guca2b	0	0	0	0	0	0	0	1.43188	0	0	0	0	0	1.71225	0	0	0	0	0	0	0	0	0	0	0	0
Guk1	0	0	0	1.05448	0	0	0	0	0	0	0	0	0	0	0	0	0	0	0	0	0	0	0	0	0	0
Gvin1	0	0	7.15896	7.82977	0	0	4.46567	0	6.37299	0	5.73022	0	0	0	0	0	0	0	0	0	0	0	0	0	0	0
H2-Aa	3.75723	6.53142	5.55151	5.87009	5.87195	6.55795	5.65707	5.67871	5.11323	5.14795	6.60777	6.26581	8.22866	7.92096	5.82	5.42451	5.26331	5.82578	4.44378	4.51574	2.37261	4.28515	0	0	0	4.86743
H2-Ab1	4.12177	5.93237	5.16822	5.11695	5.87643	6.86658	4.89691	6.17576	5.02371	5.24094	5.57487	5.70461	6.17284	7.86014	6.9846	5.96623	4.83463	4.97909	3.34845	4.24279	0	4.74906	0	0	0	4.40677
H2-D1	4.00465	4.21743	5.05133	4.81045	3.67671	3.75139	4.28545	4.81532	4.45689	5.0715	4.93976	5.04447	3.37482	3.93166	3.6655	4.91689	5.22336	4.46072	1.91481	2.00566	3.0574	3.95211	0	0	0	3.31475
H2-DMa	0	0	4.33554	4.75837	0	3.43237	4.67007	4.03216	0	4.47499	3.83539	4.90605	4.0542	5.86894	0	0	0	0	0	4.06374	0	6.70967	0	0	0	0
H2-DMb1	0	0	3.31594	4.96245	0	6.04183	0	0	0	0	0	0	0	6.17953	0	0	0	0	0	4.25983	0	0	0	0	0	0
H2-DMb2	0	0	5.80821	5.84692	0	5.85033	0	0	0	0	0	0	0	7.45436	0	0	0	0	0	5.29589	0	5.75111	0	0	0	0
H2-Eb1	5.21967	7.09786	5.59738	5.5364	4.01108	6.45442	4.59557	5.89207	4.92851	7.19501	5.31103	7.14824	5.79744	7.59995	4.6747	5.22385	5.9743	4.83395	4.06029	4.5234	0	4.54685	0	0	0	5.50518
H2-K1	4.65976	5.1867	5.67351	5.386	4.13966	4.30532	3.9148	5.38063	4.96171	5.8605	5.08347	5.96768	3.73047	4.78841	3.4768	6.09771	4.92292	5.7056	2.36339	2.47029	4.54459	4.15281	0	3.5634	0	3.63133
H2-M3	0	0	5.52235	5.1236	0	0	0	0	0	0	0	0	0	0	0	0	0	0	0	2.04224	0	0	0	0	0	0
H2-Q4	4.0421	3.85352	5.56818	4.55989	0	4.02487	6.06396	5.62865	7.00328	5.18733	5.04769	5.49459	4.18453	4.23326	6.7936	4.69446	4.90687	5.9199	3.1623	1.79207	0	3.57439	0	0	0	3.38991
H2-Q6	0	6.17533	7.86382	5.0691	0	5.1236	6.64638	6.03971	6.3032	5.69545	5.44176	7.29509	5.66748	4.87046	6.52443	6.45498	7.02601	6.27483	2.12446	2.6964	0	3.61162	0	0	0	0
H2-Q7	0	1.80013	8.10191	6.11634	0	4.91099	8.64897	7.41325	8.45495	6.38145	7.26435	8.38129	5.95716	7.79339	6.74781	7.70271	8.01737	7.00445	2.97131	2.60466	6.81027	3.90028	0	0	0	0
H2-T22	0	0	2.34709	3.18879	0	3.28679	3.0124	3.8844	2.83543	3.21912	2.81734	3.30748	0	3.80346	0	4.86067	2.66594	3.74857	0	1.98445	0	3.39587	0	0	0	3.82341
H2-T23	3.43812	3.67544	3.51465	4.41669	0	3.73584	3.99405	5.43888	3.90837	4.72049	4.21991	5.56864	3.9375	5.42843	5.23338	5.11756	5.17498	5.25983	1.81437	1.63371	2.70997	2.86539	0	0	0	3.94378
H2afj	0	0	0	0	0	0	0	0	0	0	0	0	0	0	0	0	0	0	0	0	0	1.26619	0	0	0	0
H2afz	0	0	1.5266	1.31463	0	0	1.12452	0	0	1.5132	1.95381	0	0	0	0	0	0	0	0	1.42227	0	1.94567	0	0	0	0
H3f3a	0	0	0	0	0	0	0	0	0	0	1.53395	0	0	0	0	0	0	0	0	0	0	0	0	0	0	0
H3f3b	0	0	0	0	0	0	0	0	1.58037	0	2.40089	1.2861	1.05938	0	0	0	1.60193	0	0	0	0	0	0	0	0	0
H6pd	0	0	0	0	0	0	0	0	0	0	0	0	0	1.67999	0	0	0	0	0	0	0	0	0	0	0	0
Hap1	0	0	0	0	0	0	3.05585	0	3.69148	0	0	0	0	0	0	0	0	0	0	0	0	0	0	0	0	0
Havcr1	0	0	5.96627	2.43499	0	0	7.13698	3.66965	5.71975	4.34786	0	4.31819	0	5.21917	0	0	0	0	0	2.60416	0	0	0	0	0	0
Hba-a1	0	0	0	0	0	0	0	0	0	0	0	0	0	0	0	0	0	0	0	5.10163	0	0	0	0	0	0
Hbb-bs	0	0	0	0	0	2.02036	0	5.05017	0	5.41913	0	6.47403	0	6.50505	0	5.76958	0	0	0	5.99933	0	0	0	0	0	0
Hbegf	0	0	0	0	0	0	2.64024	1.51777	0	0	0	0	0	0	0	0	0	0	0	0	0	0	0	0	0	0
Hcfc1r1	0	0	1.01966	0	0	0	0	0	0	0	0	0	0	1.30251	0	0	0	0	0	0	0	0	0	0	0	0
Hdac7	0	0	2.53663	1.61999	0	0	0	0	1.6229	0	0	0	0	0	0	0	0	0	0	0	0	0	0	0	0	0
Hdc	0	0	2.1086	0	0	0	0	0	0	0	0	0	0	0	0	0	0	0	0	0	0	0	0	0	0	0
Hells	0	0	0	2.12105	0	0	0	0	0	0	0	0	0	0	0	0	0	0	0	0	0	0	0	0	0	0
Helz2	0	0	3.66249	2.25055	0	0	0	0	0	0	0	0	0	0	0	0	0	0	0	0	0	0	0	0	0	0
Heph	0	0	1.32631	1.40875	0	0	0	0	0	1.17262	0	1.11202	0	1.54355	0	0	0	0	0	0	0	1.36782	0	0	0	0
Herc6	3.04182	0	3.52867	4.33453	0	2.57218	2.94751	2.76271	3.35648	2.98067	3.96061	2.53418	2.69403	2.72097	3.6891	3.65038	5.28136	4.06042	1.7132	0	0	0	0	0	0	3.89808
Higd1a	0	0	0	0	0	0	0	0	0	0	0	0	0	1.48381	0	0	0	0	0	0	0	0	0	0	0	0
Hint1	0	0	0	0	0	0	0	0	0	0	0	1.37323	0	1.75983	0	0	0	0	0	0	0	1.38368	0	0	0	0
Hip1	0	0	0	0	0	0	0	0	2.49512	0	0	0	0	0	0	0	0	0	0	0	0	0	0	0	0	0
Hip1r	0	0	1.4791	0	0	0	0	0	0	0	0	0	0	0	0	0	0	0	0	0	0	0	0	0	0	0
Hist1h2bc	0	0	0	0	0	1.31446	0	0	0	0	0	1.21875	0	1.1094	0	0	0	0	0	0	0	0	0	0	0	0
Hivep1	0	0	0	0	0	0	0	0	0	0	1.44064	0	0	0	0	0	0	0	0	0	0	0	0	0	0	0
Hivep2	0	0	0	0	0	0	0	0	0	0	1.06016	0	0	0	0	0	0	0	0	0	0	0	0	0	0	0
Hk1	0	0	1.04047	0	0	0	0	0	0	0	0	0	0	0	0	0	0	0	0	0	0	0	0	0	0	0
Hk2	0	0	0	0	0	0	0	0	0	0	0	0	0	3.95109	0	0	0	0	0	0	0	5.32006	0	0	0	0
Hmgb3	0	0	1.55041	1.03949	0	0	0	0	0	0	0	0	0	1.64051	0	0	0	0	0	0	0	0	0	0	0	0
Hmgcr	0	0	0	0	0	0	0	0	0	0	0	1.35448	0	0	0	0	0	0	0	0	0	0	0	0	0	0
Hmgcs1	0	0	0	0	0	0	0	0	0	1.35439	0	0	0	0	0	0	0	0	0	0	0	0	0	0	0	0
Hnf4g	0	0	0	0	0	0	1.96904	1.80828	0	0	0	0	0	0	0	0	0	0	0	0	0	0	0	0	0	0
Hnrnpab	0	0	0	1.03089	0	0	0	0	0	0	0	0	0	1.07839	0	0	0	0	0	0	0	0	0	0	0	0
Hnrnpf	0	0	0	0	0	0	0	0	0	0	1.12467	0	0	0	0	0	0	0	0	0	0	0	0	0	0	0
Hoxb2	0	0	1.17842	0	0	0	0	0	0	0	0	0	0	0	0	0	0	0	0	0	0	0	0	0	0	0
Hoxb5os	0	0	1.29761	0	0	0	0	0	0	0	0	0	0	0	0	0	0	0	0	0	0	0	0	0	0	0
Hoxb7	0	0	1.0397	0	0	0	0	0	0	0	0	0	0	0	0	0	0	0	0	0	0	0	0	0	0	0
Hprt	0	0	1.81916	1.24743	0	0	1.03639	0	2.13674	0	1.46091	0	0	0	0	0	0	0	0	0	0	0	0	0	0	0
Hs3st1	0	0	0	0	0	0	0	0	3.41708	0	0	0	0	0	0	0	0	0	0	0	0	0	0	0	0	0
Hs6st3	0	0	0	1.58647	0	0	0	0	0	0	0	0	0	0	0	0	0	0	0	0	0	0	0	0	0	0
Hsbp1	0	0	0	0	0	0	0	0	0	0	0	0	0	1.0036	0	0	0	0	0	0	0	0	0	0	0	0
Hsd11b1	0	0	1.76674	1.25025	0	0	0	0	0	0	0	0	0	0	0	0	0	0	0	0	0	0	0	0	0	0
Hsd17b4	0	1.77385	0	0	0	0	0	0	0	0	0	0	0	0	0	0	0	0	0	0	0	1.0712	0	0	0	0
Hsp90aa1	0	0	1.1213	0	0	0	0	0	0	0	0	0	0	0	0	0	0	0	0	0	0	0	0	0	0	0
Hsp90ab1	0	0	0	0	0	0	0	0	0	0	0	0	0	0	0	0	0	0	0	0	0	1.04572	0	0	0	0
Hsp90b1	0	1.23779	0	0	0	0	0	0	0	0	0	0	0	1.32888	0	0	0	0	0	0	0	0	0	0	0	0
Hspa5	0	1.36564	0	0	0	0	0	0	0	1.07639	1.33779	1.21257	0	1.99525	0	0	0	0	0	1.05158	0	1.02705	0	0	0	0
Hspa8	0	0	0	0	0	0	0	0	0	0	0	0	0	1.26911	0	0	0	0	0	0	0	0	0	0	0	0
Hspa9	0	0	0	0	0	0	0	0	0	0	0	0	0	1.03383	0	0	0	0	0	0	0	0	0	0	0	0
Hspb1	0	0	4.7038	0	0	0	3.25989	0	0	0	0	0	0	0	0	0	0	0	0	0	0	0	0	0	0	0
Hspb8	0	0	0	0	0	0	0	0	0	0	0	2.05964	0	0	0	0	0	0	0	0	0	0	0	0	0	0
Hus1	0	0	1.10499	0	0	0	0	0	0	0	0	0	0	0	0	0	0	0	0	0	0	0	0	0	0	0
Icam1	0	0	2.83364	2.43701	0	4.03563	4.49591	0	4.59872	0	3.74933	3.63052	0	5.66549	0	5.12269	4.1041	2.86041	0	1.43815	0	0	0	0	0	0
Id2	0	0	0	0	0	0	0	1.31483	2.19763	2.5444	1.1345	1.2692	0	1.21838	0	1.60025	0	0	0	0	0	1.04055	0	0	0	0
Id3	0	0	0	0	0	0	0	0	0	0	0	2.61592	0	1.04238	0	0	0	0	0	0	0	0	0	0	0	0
Idnk	0	0	1.98143	1.98389	0	1.68496	1.72472	1.84015	2.29336	1.54792	1.63038	1.53295	0	1.85819	0	0	2.82325	0	0	0	0	0	0	0	0	0
Ido1	0	0	0	0	0	0	0	0	0	0	7.01179	0	0	0	0	0	0	0	0	0	0	0	0	0	0	0
Ier3	0	0	3.06479	0	0	0	1.12538	0	0	0	1.25028	0	3.94847	1.95435	0	0	0	0	0	0	0	0	0	0	0	0
Ifi202b	0	0	0	0	0	0	0	0	0	0	0	0	0	0	0	0	0	0	0	3.03665	0	0	0	0	0	0
Ifi204	0	0	8.63001	0	0	0	0	0	0	0	0	0	0	0	0	0	0	0	0	1.67822	0	0	0	0	0	0
Ifi207	0	0	9.71896	0	0	0	0	0	0	0	0	0	0	0	0	0	0	0	0	2.35158	0	0	0	0	0	0
Ifi27	0	2.17468	2.92288	2.86652	0	1.2774	1.60648	1.56619	2.42397	2.3091	2.78329	3.38186	0	1.74225	0	2.62606	2.82191	3.13173	0	0	0	0	0	0	0	0
Ifi27l2a	0	0	3.70291	3.26883	0	0	4.55432	3.4991	0	3.62707	0	3.78949	0	4.30231	0	0	0	0	0	0	0	1.0013	0	0	0	0
Ifi35	0	0	2.79887	2.18947	0	0	1.56819	1.08915	2.63747	0	2.30862	0	0	1.65329	0	0	0	0	0	0	0	0	0	0	0	0
Ifi44	0	0	5.91437	5.92602	0	4.722	3.28287	5.58185	4.92721	6.64449	4.67992	4.54402	2.69724	3.2	0	6.73221	0	3.91087	0	0	0	3.03178	0	0	0	0
Ifi44l	0	0	0	4.97524	0	4.0318	0	5.29829	0	3.52017	0	5.36058	0	3.14618	0	6.29773	0	0	0	0	0	0	0	0	0	5.39192
Ifih1	0	0	1.80777	2.12085	0	0	2.15973	2.34427	3.81341	2.06491	0	2.43958	0	2.06695	0	0	0	2.42374	0	0	0	0	0	0	0	0
Ifit1	0	0	3.30393	0	0	3.71276	2.52856	3.04333	0	0	0	5.323	0	2.89623	0	0	0	0	0	0	0	0	0	0	0	0
Ifit2	4.89935	0	5.15761	4.2962	0	0	1.6786	1.17962	3.98357	3.02351	5.96293	4.88787	0	0	0	0	0	0	0	0	0	0	0	0	0	0
Ifit3	3.30226	3.90117	5.31891	0	0	2.5574	4.16625	0	4.6459	0	0	0	4.04805	3.58144	0	0	0	0	0	0	0	0	0	0	0	0
Ifit3b	0	0	0	0	0	0	0	0	0	0	0	0	0	2.2501	0	0	0	0	0	0	0	0	0	0	0	0
Ifitm1	0	0	0	0	0	0	0	0	0	0	0	0	0	0	0	0	0	0	0	0	0	1.07994	0	0	0	0
Ifitm10	0	0	0	0	0	0	4.69391	0	5.14737	0	3.76239	0	3.89447	0	0	0	0	0	0	0	0	0	0	0	0	0
Ifitm3	3.92537	5.88307	5.21743	4.31657	0	4.27409	4.13684	4.43274	4.31332	4.87027	4.7161	4.53425	2.87863	4.49291	3.26881	4.73017	4.1193	5.20051	2.06213	1.40933	1.99713	1.41364	0	0	0	3.50277
Ifnar1	0	0	0	0	0	0	0	0	0	0	0	0	2.42757	1.88519	0	0	0	0	0	0	0	0	0	0	0	0
Ifngr2	0	0	1.44971	1.03034	0	0	0	0	0	0	0	0	0	0	0	0	0	0	0	0	0	0	0	0	0	0
Igf1	0	0	0	0	0	0	0	0	0	0	0	0	0	0	0	0	0	0	0	0	0	1.50972	0	0	0	0
Igf2bp2	0	0	1.16127	0	0	0	0	0	0	0	0	0	0	0	0	0	0	0	0	0	0	0	0	0	0	0
Igfbp7	1.09132	0	0	0	0	0	0	0	0	0	0	0	0	0	0	0	0	0	0	0	0	0	0	0	0	0
Igsf5	0	0	1.39502	1.27669	0	0	0	0	0	0	0	0	0	0	0	0	0	0	0	0	0	0	0	0	0	0
Iigp1	7.73133	10.3158	6.79956	9.63371	6.06703	6.76136	7.17847	10.9579	8.30889	10.6125	7.62229	9.72419	5.0251	7.79906	8.21061	11.7399	9.0013	8.71482	4.55269	4.74523	5.32445	5.03395	0	0	0	7.23913
Ikzf1	0	0	0	0	0	0	0	0	0	0	0	0	0	0	0	0	0	0	0	3.1547	0	0	0	0	0	0
Il13ra1	0	0	0	0	0	0	1.10576	0	1.4756	0	0	0	0	1.55559	0	0	0	0	0	0	0	0	0	0	0	0
Il17rc	0	0	1.38309	0	0	0	0	0	0	0	0	0	0	0	0	0	0	0	0	0	0	0	0	0	0	0
Il18bp	0	0	4.42904	4.05169	0	4.39497	3.05193	2.49484	2.92291	2.45837	2.8253	3.20051	0	3.75683	0	0	0	3.38517	0	3.55612	0	0	0	0	0	0
Il18r1	0	0	0	0	0	0	0	0	0	0	0	0	0	1.89335	0	0	0	0	0	0	0	0	0	0	0	0
Il34	0	0	4.41519	2.05696	0	0	1.33026	0	3.23952	0	6.1738	0	0	0	0	0	4.50727	0	0	0	0	0	0	0	0	0
Il6ra	0	0	0	0	0	0	0	0	0	0	0	0	0	0	0	0	0	0	0	3.46178	0	0	0	0	0	0
Il7	0	0	4.39608	2.96922	0	0	2.37276	0	3.028	1.94546	3.30811	4.98141	0	4.56288	0	4.56086	3.63095	5.74567	0	0	0	0	0	0	0	0
Ildr1	0	0	0	0	0	0	1.07421	0	0	0	0	0	0	0	0	0	0	0	0	0	0	0	0	0	0	0
Ilk	0	0	1.26109	0	0	0	0	0	0	0	0	0	0	0	0	0	0	0	0	0	0	0	0	0	0	0
Immp2l	0	0	1.28074	0	0	0	0	0	1.27727	0	0	0	0	0	0	0	0	0	0	0	0	0	0	0	0	0
Inpp1	0	0	1.34486	1.2504	0	0	0	0	0	0	0	0	0	0	0	0	0	0	0	0	0	0	0	0	0	0
Inpp5j	0	0	1.00551	0	0	0	0	0	0	0	0	0	0	0	0	0	0	0	0	0	0	0	0	0	0	0
Insl6	0	0	0	0	0	0	0	0	0	0	0	0	0	2.78463	0	0	0	0	0	0	0	0	0	0	0	0
Iqgap1	0	0	1.25237	0	0	0	0	0	0	0	0	0	0	0	0	0	0	0	0	0	0	0	0	0	0	0
Irf1	3.97358	5.45782	4.93687	5.76696	0	3.78176	4.78142	4.56177	6.71726	4.65247	3.593	5.08129	3.54711	4.04294	3.16961	5.49554	4.00401	4.62725	3.08466	2.34108	2.73007	2.96783	0	0	0	4.88442
Irf2	0	0	1.07244	0	0	0	0	0	0	0	0	0	0	0	0	0	0	0	0	0	0	0	0	0	0	0
Irf2bpl	0	0	2.02479	1.33962	0	0	0	0	0	0	2.57897	0	0	0	0	0	0	0	0	0	0	0	0	0	0	0
Irf6	0	0	1.06974	0	0	0	0	0	0	0	0	0	0	0	0	0	0	0	0	0	0	0	0	0	0	0
Irf7	0	0	4.9496	4.61631	0	4.56766	3.80091	5.44516	4.84454	0	4.6442	4.8799	3.18555	4.16305	0	3.60441	0	0	0	1.32436	0	0	0	0	0	0
Irf9	0	0	2.53401	1.30319	0	0	1.78797	1.57379	1.70189	0	2.10924	0	0	0	0	0	0	0	0	0	0	0	0	0	0	0
Irgm1	4.78478	7.03734	4.61037	4.71791	3.95674	4.6582	4.43057	5.59975	6.74913	5.25453	4.58843	6.74038	4.02679	5.2578	5.86049	5.60693	4.99398	4.8353	3.31123	3.31361	5.05758	4.26689	0	0	0	4.67876
Irgm2	4.61155	4.48885	4.81422	5.89949	0	4.84563	4.70668	6.18696	6.32274	5.08227	5.2688	6.53711	5.02382	5.80851	4.13991	4.90932	6.95201	6.29058	3.19954	3.1927	2.93378	3.87529	0	0	0	4.61361
Isg15	0	0	5.13601	5.63794	0	3.56815	2.97031	3.8303	3.89052	4.06929	4.47724	4.49211	0	3.7579	0	4.72242	0	0	0	0	0	0	0	0	0	0
Isg20	0	0	0	0	0	0	6.0985	0	0	0	0	0	0	0	0	0	0	0	0	0	0	0	0	0	0	0
Itga1	0	0	0	0	0	0	0	0	0	0	0	0	0	0	0	0	0	0	0	1.29751	0	0	0	0	0	0
Itga2	0	0	0	0	0	0	0	0	0	0	0	0	0	1.87972	0	0	0	0	0	0	0	0	0	0	0	0
Itga3	0	0	1.10719	0	0	0	1.25585	0	0	0	0	0	0	0	0	0	0	0	0	0	0	0	0	0	0	0
Itga4	0	0	0	0	0	0	0	0	0	0	0	0	0	0	0	0	0	0	0	5.45541	0	0	0	0	0	0
Itga6	0	0	0	0	0	0	1.55134	0	1.22536	0	0	0	0	0	0	0	0	0	0	1.15389	0	0	0	0	0	0
Itgav	0	0	0	0	0	0	1.03664	0	1.66696	0	0	0	0	0	0	0	1.50452	0	0	0	0	0	0	0	0	0
Itgb1	0	0	1.53847	0	0	0	0	0	0	0	0	0	0	0	0	0	0	0	0	0	0	0	0	0	0	0
Itgb2l	0	0	2.74494	0	0	0	0	0	0	0	0	0	0	0	0	0	0	0	0	0	0	0	0	0	0	0
Itgb6	0	0	0	0	0	1.28682	0	0	1.35736	0	1.65979	1.14882	0	1.05181	0	1.11304	0	0	0	0	0	0	0	0	0	0
Itgb7	0	0	0	0	0	0	0	0	0	0	0	0	0	0	0	0	0	0	0	3.08768	0	0	0	0	0	0
Itgb8	0	0	0	0	0	0	1.0075	0	0	0	0	0	0	0	0	0	0	0	0	0	0	0	0	0	0	0
Itm2c	0	0	1.18586	1.11498	0	0	0	0	0	0	0	0	0	0	0	0	0	0	0	0	0	0	0	0	0	0
Itpk1	0	0	0	1.0285	0	0	0	0	0	0	0	0	0	0	0	0	0	0	0	0	0	0	0	0	0	0
Itpr3	0	0	0	0	0	0	2.60157	0	3.50046	0	0	0	0	0	0	0	0	0	0	0	0	0	0	0	0	0
Ivns1abp	0	0	0	0	0	0	0	0	1.24539	0	0	0	0	0	0	0	0	0	0	0	0	0	0	0	0	0
Jak2	0	0	1.08659	0	0	0	0	0	0	0	0	0	0	0	0	0	0	0	0	0	0	0	0	0	0	0
Jam3	0	0	1.29621	0	0	0	0	0	0	0	0	0	0	0	0	0	0	0	0	0	0	0	0	0	0	0
Jazf1	0	0	4.17844	2.09674	0	0	2.03336	0	0	0	0	0	0	0	0	0	0	0	0	0	0	0	0	0	0	0
Jpt1	0	0	2.20425	1.31464	0	0	1.91485	1.60058	0	0	2.24311	1.56407	0	2.01993	0	0	0	0	0	1.67601	0	0	0	0	0	0
Jpt2	0	0	2.23561	0	0	0	1.32955	0	0	0	1.81965	0	0	0	0	0	0	0	0	0	0	0	0	0	0	0
Jun	0	0	0	0	0	0	2.28492	1.63357	2.88625	2.55629	2.51451	1.5899	0	2.29821	0	0	0	0	0	0	0	0	0	0	0	0
Junb	0	0	1.7037	1.05781	0	0	1.3756	0	4.21056	0	0	0	0	0	0	0	0	0	0	1.55718	0	0	0	0	0	0
Jund	0	0	1.05377	0	0	0	0	0	0	0	1.79216	0	0	0	0	0	0	0	0	1.06457	0	0	0	0	0	0
Kalrn	0	0	0	0	0	0	0	0	0	0	0	0	0	0	0	0	0	0	0	0	0	1.65722	0	0	0	0
Kank3	0	0	0	0	0	0	3.69328	2.03125	0	0	0	0	0	0	0	0	0	0	0	0	0	0	0	0	0	0
Kansl1l	0	0	0	0	0	0	1.05224	0	1.68765	0	1.35475	0	0	0	1.17391	0	0	0	0	0	0	0	0	0	0	0
Kars	0	0	1.54065	1.61443	0	0	0	1.38082	0	0	0	0	0	1.47976	0	0	0	0	0	1.41367	0	0	0	0	0	0
Katna1	0	0	1.02074	1.21709	0	0	0	0	0	0	0	0	0	0	0	0	0	0	0	0	0	0	0	0	0	0
Kbtbd11	0	0	0	0	0	0	1.63411	1.0141	0	0	0	0	0	0	0	0	0	0	0	0	0	0	0	0	0	0
Kcnb1	0	0	2.95841	2.10391	0	0	0	0	0	0	0	0	0	0	0	0	0	0	0	0	0	0	0	0	0	0
Kcnh1	0	0	1.38605	1.11098	0	0	4.01027	2.33653	0	0	0	0	0	0	0	0	0	0	0	0	0	0	0	0	0	0
Kcnip4	0	0	1.08293	0	0	0	0	0	0	0	0	0	0	0	0	0	0	0	0	0	0	0	0	0	0	0
Kcnk1	0	0	0	0	0	0	0	0	0	1.18177	0	0	0	0	0	0	0	0	0	0	0	0	0	0	0	0
Kcnk2	0	0	1.07506	1.0101	0	0	0	0	0	0	0	0	0	0	0	0	0	0	0	0	0	0	0	0	0	0
Kcnq1	0	0	1.14558	0	0	0	0	0	0	0	0	0	0	0	0	0	0	0	0	0	0	0	0	0	0	0
Kcnq1ot1	0	0	0	0	0	0	0	0	1.70836	0	1.10248	0	0	0	0	0	0	0	0	0	0	0	0	0	0	0
Kctd1	0	0	0	0	0	0	1.16102	0	0	0	0	0	0	0	0	0	0	0	0	0	0	0	0	0	0	0
Kctd12	0	0	0	0	0	0	0	0	0	0	2.66846	0	0	1.81958	0	0	0	0	0	0	0	0	0	0	0	0
Kdelr2	0	0	0	0	0	0	0	0	0	0	0	1.17795	0	0	0	0	0	0	0	0	0	0	0	0	0	0
Keap1	0	0	1.02876	0	0	0	0	0	0	0	0	0	0	0	0	0	0	0	0	0	0	0	0	0	0	0
Kif23	0	0	0	0	0	0	2.37304	0	2.43718	0	0	0	0	0	0	0	0	0	0	0	0	0	0	0	0	0
Kif24	0	0	0	1.18311	0	0	0	0	0	0	0	0	0	0	0	0	0	0	0	0	0	0	0	0	0	0
Kif26b	0	0	0	0	0	0	0	0	0	0	0	0	0	0	0	0	0	0	0	0	0	2.84224	0	0	0	0
Kif6	0	0	0	1.52029	0	0	0	0	0	0	0	0	0	0	0	0	0	0	0	0	0	0	0	0	0	0
Klf6	0	0	2.87555	1.67883	0	0	2.21374	1.19538	0	0	3.52938	1.43437	0	0	0	0	0	0	2.27541	1.74828	0	0	0	0	0	0
Klf7	0	0	0	0	0	0	1.29069	0	1.56836	0	1.70616	0	0	0	0	0	0	0	0	0	0	0	0	0	0	0
Krt18	0	0	0	0	0	0	2.74264	0	0	0	3.96179	1.96417	1.60323	1.24909	0	0	0	0	0	0	0	0	0	0	0	0
Krt19	0	0	0	0	0	0	0	0	0	0	3.47206	0	5.09248	2.3585	0	0	0	0	0	0	0	0	0	0	0	0
Krt7	0	0	0	0	0	0	0	0	1.29049	0	1.32825	0	0	0	0	0	0	0	0	0	0	0	0	0	0	0
Krt8	0	0	1.30166	0	0	0	1.00339	1.23818	2.47427	0	3.58612	2.45851	1.51894	1.88255	0	0	0	0	0	0	0	0	0	0	0	0
Lacc1	0	0	2.02309	0	0	0	0	0	0	0	0	0	0	0	0	0	0	0	0	0	0	0	0	0	0	0
Lad1	0	0	1.18467	0	0	0	0	0	0	0	0	0	0	0	0	0	0	0	0	0	0	0	0	0	0	0
Lamb3	0	0	1.14594	0	0	0	0	0	0	0	0	0	0	0	0	0	0	0	0	0	0	0	0	0	0	0
Lamc2	0	0	0	0	0	0	0	0	0	0	1.32739	0	0	0	0	0	0	0	0	0	0	0	0	0	0	0
Lamp2	0	0	0	0	0	0	0	0	0	0	0	0	0	1.16345	0	1.15273	0	0	0	0	0	0	0	0	0	0
Lap3	0	0	0	0	0	0	0	1.26335	0	0	0	1.66272	0	2.32612	0	0	0	0	0	1.48219	0	0	0	0	0	0
Laptm4a	0	0	1.34835	1.14862	0	0	0	0	1.09097	0	1.74354	1.13635	0	0	0	1.23355	0	0	0	0	0	0	0	0	0	0
Laptm5	0	0	0	0	0	0	5.0324	0	0	0	0	0	0	0	0	0	0	0	0	4.28506	0	4.76548	0	0	0	0
Lars2	0	0	0	0	0	1.03108	0	0	0	0	0	0	0	1.05466	0	0	0	0	0	0	0	0	0	0	0	0
Lcn2	0	0	5.77344	3.19617	0	3.57281	5.98396	4.05755	6.57819	4.96107	9.04328	4.29124	2.30971	3.35022	6.07596	0	6.64045	0	0	2.81078	0	5.82954	0	0	0	0
Lcp1	0	0	0	0	0	0	0	0	0	0	0	0	0	3.67438	0	0	0	0	0	1.49937	0	3.55513	0	0	0	0
Lcp2	0	0	0	0	0	0	0	0	0	0	0	0	0	0	0	0	0	0	0	4.04709	0	0	0	0	0	0
Ldha	0	0	0	0	0	0	0	0	0	0	0	0	0	1.59158	0	0	0	0	0	0	0	0	0	0	0	0
Ldhd	0	0	1.03636	0	0	0	0	0	0	0	0	1.74304	2.37653	1.20191	0	0	0	0	0	0	0	0	0	0	0	0
Ldlrad4	0	0	0	0	0	0	1.14454	0	0	0	0	0	0	0	0	0	0	0	0	0	0	1.06954	0	0	0	0
Leprot	0	0	1.11896	0	0	0	0	0	0	0	0	0	0	0	0	0	0	0	0	0	0	0	0	0	0	0
Leprotl1	0	0	1.3476	1.54838	0	0	0	0	0	0	0	1.37131	0	0	0	0	0	0	0	0	0	0	0	0	0	0
Lgals1	0	0	1.9903	2.0204	0	0	2.29676	2.67521	0	2.80105	0	1.97937	0	2.06501	0	0	0	0	0	2.28063	2.33772	2.53349	0	0	0	0
Lgals3	0	0	3.81928	2.69999	0	0	1.96143	1.64638	1.72326	2.21521	1.89193	1.66127	0	0	0	0	0	0	0	2.45062	0	3.00588	0	0	0	0
Lgals3bp	0	0	3.21399	3.12444	0	0	2.88547	2.89674	2.98553	3.69212	3.35172	3.25728	0	3.12471	0	0	0	0	0	1.5135	0	0	0	0	0	0
Lgals8	0	0	0	0	0	0	1.05317	0	0	0	1.81894	0	0	0	0	0	0	0	0	0	0	0	0	0	0	0
Lgals9	0	0	0	0	0	0	0	0	0	0	0	0	5.56388	4.16344	0	0	0	0	0	0	0	0	0	0	0	0
Lgmn	0	0	0	0	0	0	0	0	0	0	0	0	0	1.85637	0	0	0	0	0	0	0	0	0	0	0	0
Lhfpl2	0	0	2.33987	0	0	0	0	0	0	0	0	0	0	0	0	0	0	0	0	0	0	0	0	0	0	0
Limd2	0	0	0	0	0	0	0	0	0	0	0	0	0	0	0	0	0	0	0	2.54931	0	0	0	0	0	0
Litaf	0	0	3.57136	2.45556	0	0	1.06064	0	0	0	0	0	0	0	0	0	0	0	2.54773	1.6091	0	0	0	0	0	0
Lmna	0	0	0	0	0	0	0	0	0	0	0	0	0	0	0	0	0	0	0	0	0	1.51577	0	0	0	0
Lox	0	0	0	0	0	0	0	0	0	0	0	0	0	0	0	0	0	0	0	0	0	4.98085	0	0	0	0
Loxl2	0	0	0	0	0	0	0	0	0	0	0	0	0	2.71076	0	0	0	0	0	0	0	0	0	0	0	0
Lpp	0	0	0	0	0	0	0	0	0	0	0	0	0	0	0	0	0	0	0	0	1.32443	0	0	0	0	0
Lrch1	0	0	1.82354	1.65488	0	0	0	0	0	0	0	0	0	0	0	0	0	0	0	0	0	0	0	0	0	0
Lrmda	0	0	0	0	0	0	0	0	0	0	0	0	0	0	0	1.0452	0	0	0	0	0	0	0	0	0	0
Lrp10	0	0	0	0	0	0	0	0	0	0	0	0	0	1.17535	0	0	0	0	0	0	0	0	0	0	0	0
Lrrc4	0	0	1.03478	0	0	0	1.00523	0	1.43526	0	0	0	0	0	0	0	0	0	0	0	0	0	0	0	0	0
Lrrc59	0	0	0	0	0	0	0	0	0	0	0	0	0	1.96493	0	0	0	0	0	0	0	0	0	0	0	0
Lrrc8b	0	0	0	0	0	0	1.33319	0	0	0	0	0	0	0	0	0	0	0	0	0	0	0	0	0	0	0
Lrrfip1	0	0	1.24106	0	0	0	0	0	0	0	0	0	0	0	0	0	0	0	0	0	0	0	0	0	0	0
Lrriq1	0	0	1.55086	1.81652	0	0	0	0	0	0	0	0	0	0	0	0	0	0	0	0	0	0	0	0	0	0
Lrrk1	0	0	0	0	0	0	1.17902	0	0	0	0	0	0	0	0	0	0	0	0	0	0	0	0	0	0	0
Lsm3	0	0	0	1.1094	0	0	0	0	0	0	0	0	0	0	0	0	0	0	0	0	0	0	0	0	0	0
Lsm4	0	0	0	0	0	0	0	0	0	0	0	0	0	1.42525	0	0	0	0	0	0	0	0	0	0	0	0
Lsp1	0	0	0	0	0	0	0	0	0	0	0	0	0	0	0	0	0	0	0	6.33359	0	0	0	0	0	0
Lst1	0	0	0	0	0	0	5.57802	0	0	0	0	0	0	2.42391	0	0	0	0	0	2.96641	0	0	0	0	0	0
Ltb	0	0	0	0	0	0	0	0	0	0	0	0	0	0	0	0	0	0	0	3.79122	0	0	0	0	0	0
Ltbp2	0	0	0	0	0	0	0	0	0	0	0	0	0	0	0	0	0	0	0	0	0	6.09671	0	0	0	0
Ltc4s	0	0	0	0	0	0	0	0	2.46024	2.15726	1.79833	1.35867	0	0	0	0	0	0	0	2.12508	0	0	0	0	0	0
Lurap1	0	0	0	0	0	0	0	0	0	1.40446	0	0	0	0	0	0	0	0	0	0	0	0	0	0	0	0
Ly6a	2.47893	3.71931	4.33206	3.98189	4.30498	4.73184	1.42978	2.82149	2.80454	3.59976	3.44514	5.30938	5.86387	6.64568	4.49818	5.10388	4.97685	4.42177	1.91799	2.4595	3.40299	4.32833	0	0	0	4.49967
Ly6c1	0	0	4.06449	0	0	0	2.68017	0	2.99025	0	4.7415	0	0	0	0	0	0	0	0	0	0	0	0	0	0	0
Ly6e	3.80573	5.62347	6.08414	4.6159	5.02293	5.0418	4.31641	4.74038	3.92486	3.26404	3.97163	4.02253	0	4.84831	2.85241	6.74627	3.52665	5.8016	0	0	3.73762	2.78282	0	0	0	3.67366
Ly75	0	0	6.61129	5.92016	0	0	3.70528	0	2.04368	2.30578	0	1.61523	0	3.92211	0	0	0	0	0	0	0	0	0	0	0	0
Ly86	0	0	0	0	0	0	0	0	0	0	0	0	0	0	0	0	0	0	0	4.34069	0	0	0	0	0	0
Lypd6b	0	0	5.36227	3.19824	0	0	0	0	0	0	0	0	0	0	0	0	0	0	0	0	0	0	0	0	0	0
Lysmd4	0	0	1.01603	0	0	0	0	0	0	0	0	0	0	0	0	0	0	0	0	0	0	0	0	0	0	0
Lyz2	0	0	7.08713	5.61962	0	4.85712	6.44473	4.83019	5.50709	4.74861	5.71007	3.50464	6.25864	6.43768	6.27401	6.78091	6.81584	5.66365	5.22425	4.82762	6.25017	4.9564	0	0	0	0
Maea	0	0	1.01234	0	0	0	0	0	0	0	0	0	0	0	0	0	0	0	0	0	0	0	0	0	0	0
Mal2	0	0	0	0	0	0	0	0	0	0	1.9284	0	0	0	0	0	0	0	0	0	0	0	0	0	0	0
Maml1	0	0	0	0	0	0	0	0	1.07129	0	0	0	0	0	0	0	0	0	0	0	0	0	0	0	0	0
Manf	0	0	0	0	0	0	0	0	0	0	0	1.32466	0	1.1577	0	0	0	0	0	0	0	1.35299	0	0	0	0
Map3k1	0	0	1.90014	1.4788	0	0	0	0	1.19847	0	0	0	0	0	0	0	1.62834	1.18312	0	0	0	0	0	0	0	0
Map3k12	0	0	1.20272	0	0	0	0	0	0	0	0	0	0	0	0	0	0	0	0	0	0	0	0	0	0	0
Map3k14	0	0	1.18516	0	0	0	0	0	1.34866	0	0	0	0	0	0	0	0	0	0	0	0	0	0	0	0	0
Map3k21	0	0	1.5991	1.10895	0	0	0	0	0	0	0	0	0	0	0	0	0	0	0	0	0	0	0	0	0	0
Map4	0	0	0	0	0	0	0	0	1.03406	0	0	0	0	0	0	0	0	0	0	0	0	0	0	0	0	0
Map4k4	0	0	0	0	0	0	1.06665	0	0	0	2.94382	0	0	0	0	0	0	0	0	0	0	0	0	0	0	0
Mapk13	0	0	0	0	0	0	1.43675	0	0	0	0	0	0	2.01153	0	0	0	0	0	0	0	0	0	0	0	0
Mapk4	0	0	0	0	0	0	2.91314	0	0	0	0	0	0	0	0	0	0	0	0	0	0	0	0	0	0	0
Mapkapk2	0	0	1.03635	0	0	0	0	0	0	0	0	0	0	1.13374	0	0	0	0	0	0	0	0	0	0	0	0
Marcks	0	0	0	0	0	0	0	0	0	0	4.58733	0	0	0	0	0	0	0	0	0	0	0	0	0	0	0
Marcksl1	0	0	0	0	0	0	0	0	0	0	0	0	0	0	0	0	0	0	0	1.47723	0	0	0	0	0	0
Mast4	0	0	1.02686	0	0	0	0	0	1.22059	0	0	0	0	0	0	0	0	0	0	0	0	0	0	0	0	0
Mb21d2	0	0	0	0	0	0	0	0	0	0	0	0	0	0	0	0	0	0	0	1.29241	0	0	0	0	0	0
Mboat1	0	0	0	0	0	0	1.29417	0	0	0	0	0	0	0	0	0	0	0	0	0	0	0	0	0	0	0
Mcc	0	0	3.34391	2.6406	0	0	1.75304	0	2.1382	0	0	0	0	0	0	0	0	0	0	0	0	0	0	0	0	0
Mcl1	0	0	1.37787	0	0	0	0	0	0	0	1.63724	0	0	0	0	0	0	0	0	0	0	0	0	0	0	0
Mcm6	0	0	0	0	0	0	0	0	0	0	0	0	0	0	0	0	0	0	0	2.31427	0	0	0	0	0	0
Mdfic	0	0	0	1.19061	0	0	0	0	0	0	2.30931	0	0	0	0	0	0	0	0	0	0	0	0	0	0	0
Med7	0	0	0	0	0	0	1.00075	0	0	0	0	0	0	0	0	0	0	0	0	0	0	0	0	0	0	0
Mex3c	0	0	1.12036	0	0	0	0	0	0	0	0	0	0	0	0	0	0	0	0	0	0	0	0	0	0	0
Mfge8	0	2.19907	4.46857	3.20491	0	0	0	0	0	0	0	0	0	0	0	0	0	0	0	0	0	0	0	0	0	0
Mfsd4a	0	0	1.08573	0	0	0	0	0	0	0	0	0	0	0	0	0	0	0	0	0	0	0	0	0	0	0
Mgat4b	0	0	0	0	0	0	0	0	0	0	0	0	0	1.29815	0	0	0	0	0	0	0	0	0	0	0	0
Mgp	0	0	2.73177	3.39461	0	0	2.53255	2.93539	0	3.12348	0	3.09079	0	3.0795	0	0	0	0	0	1.68625	0	1.60876	0	0	0	0
Mgst1	0	0	1.92454	1.39414	0	0	0	0	0	0	2.04402	0	2.4422	0	0	0	0	0	0	0	0	0	0	0	0	0
Micall1	0	0	1.18816	0	0	0	0	0	0	0	0	0	0	0	0	0	0	0	0	0	0	0	0	0	0	0
Mid1	0	0	0	1.22882	0	0	0	0	0	0	0	0	0	0	0	0	0	0	0	0	0	0	0	0	0	0
Mif	0	0	0	0	0	0	0	0	0	0	0	0	0	1.7398	0	0	0	0	0	0	0	0	0	0	0	0
Mif4gd	0	0	0	1.04104	0	0	0	0	0	0	0	0	0	0	0	0	0	0	0	0	0	0	0	0	0	0
Mir142hg	0	0	0	0	0	0	0	0	0	0	0	0	0	0	0	0	0	0	0	5.4929	0	0	0	0	0	0
Misp	0	0	2.984	2.23552	0	0	1.29197	0	0	0	0	0	0	0	0	0	0	0	0	0	0	0	0	0	0	0
Mitd1	0	0	0	0	0	0	1.09707	1.25766	0	0	0	0	0	0	0	0	0	0	0	0	0	0	0	0	0	0
Mlkl	0	0	5.1967	4.92617	0	0	2.61962	2.70235	0	0	0	0	0	3.44472	0	0	0	0	0	0	0	0	0	0	0	0
Mllt3	0	0	0	1.03394	0	0	0	0	2.81893	0	0	0	0	0	0	0	0	0	0	0	0	0	0	0	0	0
Mmp14	0	0	0	0	0	0	0	0	0	0	0	0	0	0	0	0	0	0	0	3.0421	0	0	0	0	0	0
Mmp7	0	0	0	0	0	0	9.6291	0	5.91128	0	0	0	0	0	0	0	0	0	0	0	0	0	0	0	0	0
Mms22l	0	0	0	1.49082	0	0	0	0	0	0	0	0	0	0	0	0	0	0	0	0	0	0	0	0	0	0
Mndal	0	0	0	0	0	0	0	0	0	0	0	0	0	0	0	0	4.63409	0	0	0	0	0	0	0	0	0
Mob1a	0	0	1.1292	0	0	0	0	0	0	0	0	0	0	0	0	0	0	0	0	0	0	0	0	0	0	0
Mocos	0	0	1.09967	1.40889	0	0	0	0	0	0	0	0	0	0	0	0	0	0	0	0	0	0	0	0	0	0
Morf4l2	0	0	1.14739	0	0	0	0	0	0	0	0	0	0	0	0	0	0	0	0	0	0	0	0	0	0	0
Mov10	0	0	0	0	0	0	1.59123	1.02997	0	0	0	0	0	0	0	0	0	0	0	0	0	0	0	0	0	0
Mpeg1	0	0	6.42724	0	0	0	4.56945	5.44021	0	0	0	0	0	5.27215	0	0	0	0	0	4.468	0	4.04353	0	0	0	0
Mrpl14	0	0	0	0	0	0	0	0	0	0	0	0	0	1.44409	0	0	0	0	0	0	0	0	0	0	0	0
Mrpl17	0	0	0	1.03198	0	0	0	0	0	0	0	0	0	1.43116	0	0	0	0	0	0	0	0	0	0	0	0
Mrpl20	0	0	0	0	0	0	0	0	0	0	0	0	0	1.11872	0	0	0	0	0	0	0	0	0	0	0	0
Mrpl30	0	0	0	0	0	0	0	0	0	0	0	0	0	1.12201	0	0	0	0	0	0	0	0	0	0	0	0
Mrpl33	0	0	1.17057	1.02905	0	0	0	0	0	0	0	0	0	0	0	0	0	0	0	0	0	0	0	0	0	0
Mrpl35	0	0	0	1.15118	0	0	0	0	0	0	0	0	0	0	0	0	0	0	0	0	0	0	0	0	0	0
Mrpl51	0	0	0	0	0	0	0	0	0	0	0	0	0	1.38389	0	0	0	0	0	0	0	0	0	0	0	0
Mrpl54	0	0	0	1.3479	0	0	0	0	0	0	0	1.54926	0	1.40646	0	0	0	0	0	0	0	0	0	0	0	0
Mrpl57	0	0	0	0	0	0	0	0	0	0	0	0	0	1.26472	0	0	0	0	0	0	0	0	0	0	0	0
Mrps14	0	0	0	0	0	0	0	0	0	0	0	1.19467	0	0	0	0	0	0	0	0	0	0	0	0	0	0
Mrps28	0	0	0	0	0	0	0	0	0	0	0	0	0	1.07152	0	0	0	0	0	0	0	0	0	0	0	0
Ms4a6b	0	0	0	0	0	0	0	0	0	0	0	0	0	0	0	0	0	0	0	5.02356	0	0	0	0	0	0
Ms4a6c	0	0	0	0	0	0	0	0	0	0	0	0	0	0	0	0	0	0	0	4.97354	0	0	0	0	0	0
Msn	0	0	2.20818	1.93001	0	1.25053	1.63113	1.11978	2.1459	0	1.9762	1.83717	0	2.25025	0	0	0	0	0	0	0	2.10881	0	0	0	0
Msrb1	0	0	0	0	0	0	1.22811	0	1.2808	0	0	0	0	0	0	0	0	0	0	0	0	0	0	0	0	0
mt-Atp6	0	0	0	0	0	0	0	0	0	0	0	0	0	1.59302	0	1.1267	0	0	0	0	0	0	0	0	0	0
mt-Co1	0	1.56563	0	0	0	1.08179	0	0	0	0	0	1.11396	0	1.86283	0	1.37724	0	1.06741	0	0	0	0	0	0	0	1.67192
mt-Co2	0	0	0	0	0	0	0	0	0	0	0	0	0	1.49009	0	1.0954	0	0	0	0	0	0	0	0	0	0
mt-Co3	0	1.52141	0	0	0	1.10583	0	0	0	1.02228	0	1.26364	0	1.89961	0	1.40106	0	0	0	0	0	0	0	0	0	0
mt-Nd1	0	0	0	0	0	0	0	0	0	0	0	0	0	1.39488	0	0	0	0	0	0	0	0	0	0	0	0
mt-Nd4	0	0	0	0	0	0	0	0	0	0	0	0	0	1.07644	0	0	0	0	0	0	0	0	0	0	0	0
Mt1	0	0	1.51944	1.25972	0	2.07287	1.13717	1.01087	0	0	0	0	2.54691	3.96173	0	1.64617	0	0	0	1.28748	0	0	0	0	0	0
Mt2	0	0	1.91478	0	0	4.18245	1.58477	1.79969	0	0	0	0	0	4.90596	0	0	0	0	0	0	0	0	0	0	0	0
Mthfd1l	0	0	1.29603	0	0	0	0	0	0	0	0	0	0	0	0	0	0	0	0	0	0	0	0	0	0	0
Mtmr7	0	0	0	1.44567	0	0	0	0	0	0	0	0	0	0	0	0	0	0	0	0	0	0	0	0	0	0
Mtss1l	0	0	5.08102	0	0	0	2.00744	0	0	0	0	0	0	0	0	0	0	0	0	0	0	0	0	0	0	0
Muc4	0	0	0	0	0	0	0	0	0	0	0	0	0	5.04655	0	0	0	0	0	0	0	0	0	0	0	0
Mvp	0	0	2.08941	2.01651	0	0	1.84158	1.19469	0	0	0	0	0	1.6149	0	0	0	0	0	0	0	0	0	0	0	0
Mxra7	0	0	0	0	0	0	0	0	3.5066	0	2.13325	0	0	0	0	0	0	0	0	0	0	0	0	0	0	0
Myh9	0	0	1.07255	1.16415	0	0	0	0	0	0	0	0	0	0	0	0	0	0	0	1.10569	0	0	0	0	0	0
Myl12a	0	0	1.79219	1.42102	0	0	0	1.08893	0	0	2.02807	2.0161	0	0	0	0	0	0	0	0	0	0	0	0	0	0
Mylip	0	0	1.67272	0	0	0	2.38828	0	0	0	0	0	0	0	0	0	0	0	0	0	0	0	0	0	0	0
Mylk	0	0	0	0	0	0	1.64794	0	0	0	0	0	0	0	0	0	0	0	0	0	0	0	0	0	0	0
Myo1b	0	0	0	0	0	0	2.55502	0	2.4612	0	4.54276	0	0	0	0	0	0	0	0	0	0	0	0	0	0	0
Myo1f	0	0	0	0	0	0	0	0	0	0	0	0	0	0	0	0	0	0	0	3.41395	0	0	0	0	0	0
Myof	0	0	2.35285	1.13734	0	0	0	0	1.95996	1.25714	1.68183	0	0	0	0	0	0	0	0	0	0	2.47152	0	0	0	0
N4bp3	0	0	0	0	0	0	0	0	0	0	0	0	0	0	0	0	0	0	0	1.46551	0	0	0	0	0	0
Naaa	0	0	0	0	0	0	0	0	0	0	0	0	0	0	0	0	0	0	0	0	0	4.52449	0	0	0	0
Naaladl2	0	0	2.862	1.36419	0	0	1.6366	1.88446	2.23448	1.48787	0	0	0	0	0	0	0	0	0	0	0	0	0	0	0	0
Naca	0	0	0	0	0	0	0	0	0	0	1.44499	0	0	0	0	0	0	0	0	0	0	0	0	0	0	0
Nampt	0	0	1.0526	0	0	0	0	0	0	0	0	0	0	1.83302	0	2.30756	1.8597	0	0	1.83241	0	0	0	0	0	0
Napsa	0	0	0	0	0	1.27752	0	1.05937	0	1.17792	0	1.48259	0	2.09319	0	1.4266	0	0	0	0	0	0	0	0	0	0
Nav2	0	0	0	0	0	0	1.08598	0	0	0	0	0	0	0	0	0	0	0	0	0	0	0	0	0	0	0
Nav3	0	0	2.3264	0	0	0	0	0	0	0	0	0	0	0	0	0	0	0	0	0	0	0	0	0	0	0
Ncam1	0	0	1.87055	2.11354	0	0	2.77401	0	0	0	0	0	0	0	0	0	0	0	0	0	2.73287	1.87279	0	0	0	0
Nceh1	0	0	0	0	0	0	0	0	0	0	0	0	0	1.21237	0	0	0	0	0	0	0	0	0	0	0	0
Nckap5	0	0	1.05669	0	0	0	0	0	0	0	0	0	0	0	0	0	0	0	0	0	0	0	0	0	0	0
Ndrg1	0	0	1.59245	0	0	0	1.27639	1.41958	1.27598	0	0	0	0	0	0	0	0	0	0	0	0	0	0	0	0	0
Ndufa8	0	0	0	0	0	0	0	0	0	0	0	0	0	1.15367	0	0	0	0	0	0	0	0	0	0	0	0
Ndufv3	0	0	0	0	0	0	0	0	0	0	0	0	0	1.00303	0	0	0	0	0	0	0	0	0	0	0	0
Neat1	0	0	1.58396	0	0	0	0	0	0	0	0	0	0	0	0	0	0	0	0	0	0	0	0	0	0	0
Nectin2	0	0	1.35338	0	0	0	0	0	0	0	0	0	0	0	0	0	0	0	0	0	0	0	0	0	0	0
Nedd8	0	0	1.0591	0	0	0	0	0	0	0	1.64234	0	0	1.07939	0	0	0	0	0	0	0	0	0	0	0	0
Nek11	0	0	0	0	0	0	1.32311	0	0	0	0	0	0	0	0	0	0	0	0	0	0	0	0	0	0	0
Nek6	0	0	1.22985	1.0288	0	0	0	0	0	0	0	0	0	0	0	0	0	0	0	0	0	0	0	0	0	0
Nenf	0	0	0	1.09663	0	0	0	0	0	0	0	0	0	1.7654	0	0	0	0	0	0	0	0	0	0	0	0
Neurl3	0	0	6.3409	5.03141	0	0	0	0	0	0	5.64192	0	0	0	0	0	0	0	0	2.58527	0	0	0	0	0	0
Nfat5	0	0	1.39954	0	0	0	0	0	0	0	0	0	0	0	0	0	0	0	0	0	0	0	0	0	0	0
Nfatc2	0	0	0	1.3442	0	0	0	0	0	0	0	0	0	0	0	0	0	0	0	0	0	0	0	0	0	0
Nfkb1	0	0	1.53712	1.10867	0	0	0	0	0	0	0	0	0	0	0	0	0	0	0	0	0	0	0	0	0	0
Nfkbia	0	0	2.43357	1.28931	0	0	0	0	0	0	0	0	0	0	0	0	0	0	0	0	0	0	0	0	0	0
Nfkbie	0	0	0	0	0	0	0	0	0	0	0	0	0	0	0	0	0	0	0	3.29828	0	0	0	0	0	0
Nfkbiz	0	0	3.48255	2.63985	0	2.18144	2.6761	1.9954	3.30949	1.46354	2.62938	1.71731	0	1.76258	0	0	0	0	0	0	0	0	0	0	0	0
Ngf	0	0	6.46411	2.48769	0	0	0	0	0	0	0	0	0	0	0	0	0	0	0	0	0	0	0	0	0	0
Nhp2	0	0	0	1.67516	0	0	0	0	0	0	0	0	0	1.752	0	0	0	0	0	0	0	0	0	0	0	0
Nhs	0	0	0	0	0	0	0	0	0	0	0	0	0	2.06854	0	0	0	0	0	0	0	0	0	0	0	0
Ninj1	0	0	0	1.28743	0	0	0	0	0	0	0	0	0	0	0	0	0	0	0	0	0	0	0	0	0	0
Nipal2	0	0	5.00392	1.02354	0	0	0	0	1.45851	0	0	0	0	0	0	0	0	0	0	0	0	0	0	0	0	0
Nkain2	0	0	1.75909	1.16856	0	0	0	0	0	0	0	0	0	0	0	0	0	0	0	0	0	0	0	0	0	0
Nlrc4	0	0	0	1.07248	0	0	0	0	0	0	0	1.16168	0	1.20764	0	0	0	0	0	0	0	0	0	0	0	0
Nlrc5	0	3.82206	5.33504	5.68213	0	3.70621	4.50391	4.45094	5.07166	5.0355	6.55194	5.94257	4.26744	3.90482	3.31289	4.91442	7.35104	5.96196	2.76466	2.98091	5.51653	3.82471	0	0	0	4.75119
Nmi	0	0	2.66137	2.29725	0	2.15791	2.08637	2.44363	2.40996	2.20439	3.03265	2.22842	2.33051	1.9729	0	2.95635	0	2.22678	0	0	0	0	0	0	0	0
Nnmt	0	0	7.60312	0	0	0	0	0	0	0	0	0	0	0	0	0	0	0	0	0	0	0	0	0	0	0
Noct	0	0	1.73275	0	0	0	0	0	0	0	0	0	0	0	0	0	0	0	0	0	0	0	0	0	0	0
Nod1	0	0	1.1416	0	0	0	0	0	0	0	0	0	0	0	0	0	0	0	0	0	0	0	0	0	0	0
Notch1	0	0	0	0	0	0	2.54689	0	0	0	0	0	0	0	0	0	0	0	0	0	0	0	0	0	0	0
Nova1	0	0	0	1.21712	0	0	0	1.37491	0	0	0	0	0	0	0	0	0	0	0	0	0	0	0	0	0	0
Npas2	0	0	2.08674	1.67574	0	0	3.71538	0	2.90171	0	5.95169	0	0	0	0	0	0	0	0	0	0	0	0	0	0	0
Npc2	0	0	1.06789	1.0271	0	0	1.09072	0	0	0	0	0	0	0	0	0	0	0	0	0	0	2.11259	0	0	0	0
Npdc1	0	0	1.63327	1.06877	0	0	0	0	0	0	0	0	0	0	0	0	0	0	0	0	0	0	0	0	0	0
Npl	0	0	0	1.28584	0	0	0	0	0	0	0	0	0	0	0	0	0	0	0	0	0	0	0	0	0	0
Npm1	0	0	0	0	0	0	0	0	0	0	0	0	0	0	0	0	0	0	0	0	0	1.56784	0	0	0	0
Nr1h2	0	0	0	0	0	0	0	0	0	0	0	0	0	1.09863	0	0	0	0	0	0	0	0	0	0	0	0
Nras	0	0	1.31742	0	0	0	1.17942	0	0	0	0	0	0	0	0	0	0	0	0	0	0	0	0	0	0	0
Nrbp2	0	0	1.33735	0	0	0	0	0	0	0	0	0	0	0	0	0	0	0	0	0	0	0	0	0	0	0
Nrg1	0	0	1.23518	0	0	0	0	1.13148	1.19364	1.31587	1.61835	1.22742	0	1.51655	0	0	0	0	0	0	0	1.21478	0	0	0	0
Nrxn2	0	0	1.37864	0	0	0	0	0	0	0	0	0	0	0	0	0	0	0	0	0	0	0	0	0	0	0
Nrxn3	0	0	2.96584	0	0	0	0	0	3.20642	1.46452	0	0	0	0	0	0	0	0	0	0	0	0	0	0	0	0
Nsmf	0	0	1.01587	0	0	0	0	0	0	0	0	0	0	0	0	0	0	0	0	0	0	0	0	0	0	0
Nsun7	0	0	0	0	0	0	1.93319	0	3.03265	2.45665	0	0	0	0	0	0	0	0	0	0	0	0	0	0	0	0
Nt5c	0	0	1.17688	0	0	0	0	0	0	0	0	0	0	0	0	0	0	0	0	0	0	0	0	0	0	0
Nt5e	0	0	1.64732	0	0	0	0	0	0	0	0	0	0	0	0	0	0	0	0	0	0	0	0	0	0	0
Ntn4	0	0	0	0	0	0	0	0	0	0	1.16537	0	0	0	0	0	0	0	0	0	0	0	0	0	0	0
Nuak2	0	0	2.20396	1.75454	0	0	0	1.55104	2.2722	2.10681	2.89297	1.6357	2.29919	0	0	0	0	0	0	1.85498	0	0	0	0	0	0
Nub1	0	0	1.2362	0	0	0	1.08059	0	0	0	1.54844	0	0	0	0	0	0	0	0	0	0	0	0	0	0	0
Nubp1	0	0	1.20987	1.15316	0	0	0	0	0	0	0	0	0	0	0	0	0	0	0	0	0	0	0	0	0	0
Nudcd3	0	0	0	0	0	0	0	0	0	0	0	0	0	0	0	0	0	1.07618	0	0	0	0	0	0	0	0
Nudt19	0	0	0	0	0	0	0	0	0	0	0	0	0	1.67253	0	0	0	0	0	0	0	0	0	0	0	0
Nup210	0	0	1.54018	1.58834	0	0	0	0	0	0	0	0	0	0	0	0	0	0	0	0	0	0	0	0	0	0
Nup93	0	0	0	1.09941	0	0	0	0	0	0	0	0	0	0	0	0	0	0	0	0	0	0	0	0	0	0
Nupr1	2.89693	2.51103	3.10853	0	0	0	3.0744	0	0	0	0	0	0	2.57488	0	0	0	0	0	0	0	0	0	0	0	0
Nxpe3	0	0	0	0	0	0	1.82398	0	0	0	0	0	0	0	0	0	0	0	0	0	0	0	0	0	0	0
Oas2	0	0	0	0	0	0	0	0	0	0	0	0	3.17434	2.24908	0	4.00812	0	0	0	0	0	0	0	0	0	0
Oasl1	0	0	5.14681	0	0	0	0	0	0	0	0	0	0	0	0	0	0	0	0	0	0	0	0	0	0	0
Oasl2	4.40458	6.02597	6.92486	5.8031	0	6.75593	4.30628	6.06104	5.64327	5.48981	6.2821	4.37311	3.54937	4.09594	6.71804	8.11989	7.72455	5.78203	0	0	0	0	0	0	0	0
Ogfr	0	0	2.04562	1.71555	0	0	1.59711	1.87282	0	0	0	0	0	2.23064	0	0	0	0	0	0	0	0	0	0	0	0
Oit1	0	0	0	0	0	0	0	0	0	0	0	0	0	2.64344	0	0	0	0	0	0	0	0	0	0	0	0
Olfr1033	0	0	1.54042	0	0	0	0	0	0	0	0	0	0	0	0	0	0	0	0	0	0	0	0	0	0	0
Olfr56	5.88004	6.56093	6.83031	7.06358	0	5.40892	6.14351	6.85454	7.64944	6.74782	5.9492	7.51854	6.43771	5.70556	7.1363	7.9908	8.22474	4.72123	3.02882	1.62994	0	2.17202	0	0	0	6.70306
Optn	0	0	0	1.02464	0	0	0	0	0	0	0	0	0	0	0	0	0	0	0	0	0	0	0	0	0	0
Osbpl10	0	0	0	0	0	0	0	0	0	0	0	0	0	1.64459	0	0	0	0	0	0	0	0	0	0	0	0
Osmr	0	0	5.05405	0	0	0	4.08151	0	4.41603	0	0	0	0	0	0	0	0	0	0	0	0	0	0	0	0	0
P4hb	0	0	0	0	0	0	0	0	0	0	0	0	0	1.61802	0	0	0	0	0	0	0	1.46318	0	0	0	0
Pabpc1	0	0	0	0	0	0	1.19556	1.00349	0	1.10239	0	0	1.32082	1.17717	0	0	0	0	0	1.06433	0	1.73178	0	0	0	0
Pak1	0	0	0	0	0	0	0	0	2.8944	0	0	0	0	0	0	0	0	0	0	0	0	0	0	0	0	0
Pak3	0	0	2.39837	0	0	0	0	0	0	0	0	0	0	0	0	0	0	0	0	0	0	0	0	0	0	0
Pappa	0	0	0	1.25029	0	0	1.15248	0	0	0	0	0	0	0	0	0	0	0	0	0	0	0	0	0	0	0
Parm1	0	0	0	0	0	0	0	0	0	0	0	0	0	1.78678	0	1.06832	0	0	0	0	0	0	0	0	0	0
Parp10	0	0	2.04723	1.72194	0	2.33121	1.75318	2.18432	2.08725	2.32125	2.31813	1.44676	0	2.24678	0	0	0	0	0	1.23388	0	0	0	0	0	0
Parp11	0	0	2.78978	2.67296	0	0	1.3328	0	0	0	0	0	0	1.62706	0	0	0	0	0	1.38905	0	1.60971	0	0	0	0
Parp12	0	0	4.17703	3.59517	0	0	1.37343	1.13984	1.72603	1.12354	1.92948	1.24676	0	1.41734	0	0	2.83075	0	0	0	0	0	0	0	0	0
Parp14	4.65785	5.40518	5.38351	5.57391	0	3.99195	4.50065	5.31711	6.57247	4.36638	4.51375	4.83626	2.70556	3.36196	5.65418	3.73306	6.37389	5.60421	2.06492	1.49525	0	1.84016	0	0	0	3.6057
Parp3	0	0	2.53211	1.38128	0	0	1.64044	0	2.00006	0	0	2.21603	0	0	0	0	0	0	0	0	0	0	0	0	0	0
Parp8	0	0	0	0	0	0	0	0	1.24481	0	1.6903	0	0	0	0	0	3.38182	0	0	0	0	0	0	0	0	0
Parp9	0	0	2.79426	2.97154	0	2.73324	2.65805	2.66909	2.52296	2.56082	3.21889	2.5736	2.61153	2.31555	0	2.64372	3.34876	5.50625	2.10834	1.92521	0	0	0	0	0	0
Patl2	0	0	5.13137	4.31248	0	3.4789	3.36179	4.08585	3.06264	3.87717	4.21681	4.49458	4.99875	4.10358	0	4.22644	6.00947	5.39707	0	2.01194	0	3.03715	0	0	0	0
Pawr	0	0	0	0	0	0	0	0	1.09653	0	0	0	0	0	0	0	0	0	0	0	0	0	0	0	0	0
Pax8	0	0	1.24485	0	0	0	0	0	1.57048	0	0	0	0	0	0	0	0	0	0	0	0	0	0	0	0	0
Paxbp1	0	0	0	0	0	0	0	0	1.17297	0	1.54927	0	0	0	0	0	0	0	0	0	0	0	0	0	0	0
Pcbp1	0	0	0	1.01697	0	0	0	0	0	0	0	0	0	0	0	0	0	0	0	0	0	0	0	0	0	0
Pcdh7	0	0	0	0	0	0	0	0	0	0	0	0	0	0	0	0	0	0	0	0	0	1.4428	0	0	0	0
Pced1b	0	0	0	2.86353	0	0	0	0	0	0	0	0	0	0	0	0	0	0	0	0	0	0	0	0	0	0
Pcgf5	0	0	0	0	0	0	0	0	0	0	0	0	0	1.33494	0	0	0	0	0	0	0	0	0	0	0	0
Pdcd6ip	0	0	0	0	0	0	0	0	0	0	1.31179	0	0	0	0	0	0	0	0	0	0	0	0	0	0	0
Pde10a	0	0	0	0	0	0	2.75286	0	0	0	0	0	3.81828	0	0	0	0	0	0	0	0	0	0	0	0	0
Pde1c	0	0	0	0	0	0	0	0	0	0	0	0	0	0	0	0	1.97473	0	0	0	0	0	0	0	0	0
Pde3b	0	0	0	0	0	0	0	0	0	0	1.24803	0	0	0	0	0	0	0	0	0	0	0	0	0	0	0
Pdgfb	0	0	1.90673	1.31696	0	0	0	0	0	0	0	0	0	2.1158	0	0	0	0	0	0	0	0	0	0	0	0
Pdgfd	0	0	3.43807	1.98084	0	0	0	0	0	0	0	0	0	0	0	0	0	0	0	0	0	0	0	0	0	0
Pdia3	0	0	0	0	0	0	0	0	0	1.00504	1.26983	1.10074	0	1.79781	0	1.6742	0	0	0	0	0	1.10869	0	0	0	0
Pdia6	0	0	0	0	0	0	0	0	0	0	0	0	0	1.44646	0	0	0	0	0	0	0	0	0	0	0	0
Pdk4	0	0	2.65307	0	0	0	3.14806	0	0	0	0	0	0	0	0	0	0	0	0	0	0	0	0	0	0	0
Pdlim7	0	0	3.35535	0	0	0	2.04566	0	3.98164	0	0	0	0	0	0	0	0	0	0	0	0	1.38691	0	0	0	0
Pdss1	0	0	0	0	0	0	0	0	0	1.19942	0	0	0	0	0	0	0	0	0	0	0	0	0	0	0	0
Pdzd2	0	0	0	0	0	0	0	0	0	0	0	0	0	0	0	0	0	1.69837	0	0	0	0	0	0	0	0
Pdzk1ip1	0	0	0	0	0	0	0	0	0	0	1.29932	0	0	0	0	0	0	0	0	0	0	0	0	0	0	0
Pdzrn3	0	0	0	0	0	0	0	0	0	0	0	0	0	0	0	0	0	0	0	0	3.02284	1.62064	0	0	0	0
Pea15a	0	0	2.00722	1.32844	0	0	2.24218	1.18948	2.7956	1.022	2.36486	0	0	0	0	0	0	0	0	0	0	0	0	0	0	0
Peg3	0	0	1.23413	0	0	0	0	0	0	0	0	0	0	0	0	0	0	0	0	0	0	0	0	0	0	0
Peli1	0	0	1.07677	0	0	0	0	0	0	0	0	0	0	0	0	0	0	0	0	0	0	0	0	0	0	0
Per1	0	0	1.20706	0	0	0	0	0	0	0	0	0	0	0	0	0	0	0	0	0	0	0	0	0	0	0
Pfdn2	0	0	0	0	0	0	0	0	0	0	0	0	0	1.14637	0	0	0	0	0	0	0	0	0	0	0	0
Pfdn5	0	0	0	0	0	0	0	0	0	1.08957	0	0	0	0	0	0	0	0	0	0	0	0	0	0	0	0
Pfkfb3	0	0	0	0	0	0	0	0	0	0	0	0	0	0	0	0	0	0	2.38137	2.07117	0	0	0	0	0	0
Pfkl	0	0	0	0	0	0	0	0	0	0	0	0	0	1.76274	0	0	0	0	0	0	0	0	0	0	0	0
Pfkp	0	0	3.29454	2.52568	0	0	0	0	0	0	1.28836	0	0	0	0	0	0	0	0	1.42944	0	2.05248	0	0	0	0
Pfn1	0	0	1.76926	1.6985	0	1.05695	1.31407	1.30703	0	1.29866	2.24476	1.36027	0	1.46574	0	0	0	0	0	1.26443	0	1.44518	0	0	0	0
Pfn2	0	0	0	1.28939	0	0	0	0	0	0	0	0	0	0	0	0	0	0	0	0	0	0	0	0	0	0
Pgam1	0	0	0	0	0	0	0	0	0	0	0	0	0	1.38214	0	0	0	0	0	0	0	0	0	0	0	0
Pgd	0	0	1.25322	1.22203	0	0	1.07668	0	0	0	0	0	0	1.03235	0	0	0	0	0	0	0	0	0	0	0	0
Pgk1	0	0	0	0	0	0	0	0	0	0	0	0	0	1.78208	0	0	0	0	0	1.16024	0	0	0	0	0	0
Pgls	0	0	0	0	0	0	0	0	0	0	0	0	0	1.39553	0	0	0	0	0	0	0	0	0	0	0	0
Pgm2	0	0	0	0	0	0	0	0	0	0	0	0	0	1.45034	0	0	0	0	0	0	0	0	0	0	0	0
Pgs1	0	0	1.10552	0	0	0	0	0	0	0	0	0	0	0	0	0	0	0	0	0	0	0	0	0	0	0
Phactr1	0	0	1.27659	1.3388	0	0	0	1.10276	0	0	0	0	0	0	0	0	0	0	0	0	0	0	0	0	0	0
Phc2	0	0	0	0	0	0	0	0	0	0	0	0	0	1.15742	0	0	0	0	0	0	0	0	0	0	0	0
Phf11b	0	0	0	0	0	0	0	0	0	0	0	0	0	0	0	0	0	0	0	2.31903	0	0	0	0	0	0
Phf6	0	0	1.61667	1.08458	0	0	0	0	0	0	0	0	0	0	0	0	0	0	0	0	0	0	0	0	0	0
Phldb1	0	0	1.27076	0	0	0	0	0	0	0	0	0	0	0	0	0	0	0	0	0	0	0	0	0	0	0
Phlpp2	0	0	0	0	0	0	1.07328	0	0	0	0	0	0	0	0	0	0	0	0	0	0	0	0	0	0	0
Pid1	0	0	2.13073	0	0	0	0	0	0	0	0	0	0	0	0	0	0	0	0	0	0	0	0	0	0	0
Piezo1	0	0	1.42807	0	0	0	1.19829	0	1.99146	1.29863	2.1119	0	0	0	0	0	0	0	0	0	0	0	0	0	0	0
Piezo2	0	0	0	0	0	0	0	0	0	0	0	0	0	0	0	0	0	0	0	0	0	3.19028	0	0	0	0
Pigr	0	0	2.62967	1.55632	0	3.40807	3.43198	3.33182	1.76684	2.50528	4.2208	4.26516	4.69834	3.69479	0	3.49342	3.56626	3.33296	0	1.68113	0	3.02741	0	0	0	0
Pigt	0	0	0	0	0	0	0	0	0	1.58466	0	1.23461	0	0	0	0	0	0	0	0	0	0	0	0	0	0
Pik3ip1	0	0	0	0	0	0	0	0	0	0	2.03864	0	0	0	0	0	0	0	0	0	0	0	0	0	0	0
Pim1	0	0	2.48801	0	0	0	1.33563	0	0	0	0	0	0	0	0	0	0	0	0	0	0	2.89434	0	0	0	0
Pinx1	0	0	1.25467	1.13597	0	0	0	0	0	0	0	0	0	0	0	0	0	0	0	0	0	0	0	0	0	0
Pitpnm2	0	0	0	0	0	0	1.36077	0	0	0	0	0	0	0	0	0	0	0	0	0	0	0	0	0	0	0
Pkhd1	0	0	0	0	0	0	0	0	0	0	0	0	0	0	0	0	1.44764	0	0	0	0	0	0	0	0	0
Pkm	0	0	2.07868	1.44259	0	0	0	0	0	0	0	0	0	1.53344	0	0	0	0	2.05398	1.39577	0	1.39023	0	0	0	0
Pknox2	0	0	0	0	0	0	0	0	0	0	0	0	0	0	0	0	0	0	0	0	0	1.16328	0	0	0	0
Pkp2	0	0	0	0	0	0	0	0	1.26275	0	0	0	0	0	0	0	0	0	0	0	0	0	0	0	0	0
Pla2g16	0	0	3.63978	4.13753	0	4.28421	3.03846	3.23146	3.12982	2.92379	2.722	2.19371	4.32952	3.87585	0	3.04353	0	0	0	1.78895	0	2.95387	0	0	0	0
Pla2g3	0	0	1.39332	0	0	0	0	0	0	0	0	0	0	0	0	0	0	0	0	0	0	0	0	0	0	0
Pla2g4a	0	0	0	0	0	0	0	0	0	0	0	0	0	0	0	0	0	0	0	1.77606	0	0	0	0	0	0
Pla2g5	0	0	0	1.28771	0	0	0	0	0	0	0	0	0	0	0	0	0	0	0	0	0	0	0	0	0	0
Plac8	0	0	5.17728	3.666	0	5.74624	5.13795	4.50469	5.44914	4.57056	7.27841	5.14418	2.98824	5.17808	4.43736	3.38348	6.41975	2.41627	0	1.89462	3.57763	2.14967	0	0	0	0
Plagl2	0	0	0	1.04429	0	0	0	0	0	0	0	0	0	0	0	0	0	0	0	0	0	0	0	0	0	0
Platr25	0	0	0	1.12078	0	0	0	0	0	0	0	0	0	0	0	0	0	0	0	0	0	0	0	0	0	0
Plau	0	0	0	1.03041	0	1.29298	0	0	0	2.2162	0	1.85221	0	1.79968	0	0	0	0	0	1.08917	0	0	0	0	0	0
Plaur	0	0	4.56576	0	0	0	0	0	0	0	0	0	0	0	0	0	0	0	0	0	0	0	0	0	0	0
Plcb1	0	0	0	0	0	0	0	0	1.75249	0	0	1.0068	0	1.32984	0	0	0	0	0	0	0	0	0	0	0	0
Plce1	0	0	0	0	0	0	2.02805	0	0	0	0	0	0	0	0	0	0	0	0	0	0	0	0	0	0	0
Plcg2	0	0	0	0	0	0	1.10923	0	0	0	0	0	0	0	0	0	0	0	0	0	0	0	0	0	0	0
Pld2	0	0	1.94671	0	0	0	0	0	0	0	0	0	0	0	0	0	0	0	0	0	0	0	0	0	0	0
Plec	0	0	1.11281	0	0	0	0	0	0	0	0	0	0	1.02621	0	0	0	0	0	1.47009	0	1.14852	0	0	0	0
Plekha2	0	0	1.86834	1.59173	0	0	1.42252	1.44723	2.62665	0	0	0	0	1.21912	0	0	0	0	0	0	0	0	0	0	0	0
Plekhm3	0	0	1.51467	1.38237	0	0	0	0	0	0	0	0	0	0	0	0	0	0	0	0	0	0	0	0	0	0
Plekho1	0	0	2.09856	0	0	0	0	0	0	0	0	0	0	0	0	0	0	0	0	0	0	0	0	0	0	0
Plet1	0	0	0	0	0	0	0	0	0	0	0	2.36914	0	1.72727	0	0	0	0	0	0	0	0	0	0	0	0
Plgrkt	0	0	1.98078	1.5792	0	0	0	0	0	0	0	0	0	0	0	0	0	0	0	0	0	0	0	0	0	0
Plin2	0	0	1.17102	2.13653	0	0	0	0	0	0	0	0	0	0	0	0	0	0	0	0	0	0	0	0	0	0
Plk3	0	0	2.64518	0	0	0	0	0	0	0	0	0	0	0	0	0	0	0	0	0	0	0	0	0	0	0
Plpp2	0	0	1.37379	1.1217	0	0	0	0	0	0	0	0	0	1.86863	0	0	0	0	0	0	0	0	0	0	0	0
Plppr1	0	0	4.42136	0	0	0	0	0	0	0	0	0	0	0	0	0	0	0	0	0	0	0	0	0	0	0
Plscr1	0	0	0	0	0	0	1.21426	0	1.70497	0	1.72722	0	0	0	0	0	0	0	0	0	0	0	0	0	0	0
Plscr2	0	0	0	0	0	1.37964	0	0	1.42661	0	0	0	0	1.25091	0	0	0	0	0	0	0	0	0	0	0	0
Plscr3	0	0	0	0	0	0	0	0	0	0	0	0	0	1.98218	0	0	0	0	0	1.82304	0	0	0	0	0	0
Pmepa1	0	0	1.8697	0	0	0	1.46068	0	1.37781	0	1.1022	0	0	0	0	0	0	0	0	1.62304	0	1.65694	0	0	0	0
Pml	0	0	1.01996	0	0	0	0	0	0	0	0	0	0	0	0	0	0	0	0	1.21769	0	0	0	0	0	0
Pnrc1	0	0	2.31628	1.28264	0	0	0	0	0	0	0	0	0	0	0	0	0	0	0	0	0	0	0	0	0	0
Pogk	0	0	1.04077	0	0	0	0	0	0	0	0	0	0	0	0	0	0	0	0	0	0	0	0	0	0	0
Pola1	0	0	0	1.17886	0	0	0	0	0	0	0	0	0	0	0	0	0	0	0	0	0	0	0	0	0	0
Polr3e	0	0	1.54863	0	0	0	0	0	0	0	0	0	0	0	0	0	0	0	0	0	0	0	0	0	0	0
Pomp	0	0	1.81284	1.7023	0	0	1.26409	1.43189	0	0	1.73206	1.98181	0	1.5537	0	0	0	0	0	0	0	1.84995	0	0	0	0
Ppa1	0	0	1.86397	2.27566	0	0	1.37668	1.87176	0	2.58162	0	2.75592	0	2.78345	0	0	0	0	0	1.95558	0	0	0	0	0	0
Ppib	0	0	0	0	0	0	0	0	0	0	0	0	0	1.15509	0	0	0	0	0	0	0	0	0	0	0	0
Ppip5k1	0	0	1.03097	0	0	0	0	0	0	0	0	0	0	0	0	0	0	0	0	0	0	0	0	0	0	0
Ppl	0	0	0	0	0	0	2.21602	0	0	0	0	0	0	0	0	0	0	0	0	0	0	0	0	0	0	0
Ppp1r12a	0	0	1.07538	1.00515	0	0	0	0	0	0	0	0	0	0	0	0	0	0	0	0	0	0	0	0	0	0
Ppp1r14b	0	0	1.19313	0	0	0	0	0	0	0	0	0	0	1.36195	0	0	0	0	0	0	0	1.8179	0	0	0	0
Ppp4r4	0	0	1.82008	1.42251	0	1.71484	1.05311	0	0	0	0	0	0	0	0	0	0	0	0	0	0	0	0	0	0	0
Pprc1	0	0	0	1.01728	0	0	0	0	0	0	0	0	0	0	0	0	0	0	0	0	0	0	0	0	0	0
Prdx1	0	0	0	0	0	0	0	0	0	0	1.07886	0	0	0	0	0	0	0	0	0	0	0	0	0	0	0
Prdx4	0	0	0	0	0	0	1.59028	0	2.7531	0	0	0	0	0	0	0	0	0	0	0	0	0	0	0	0	0
Prelid1	0	0	0	0	0	0	0	0	0	0	0	0	0	1.4424	0	0	0	0	0	0	0	0	0	0	0	0
Prickle2	0	0	3.18172	2.25855	0	0	0	0	2.83436	0	3.91543	0	0	0	0	0	0	0	0	0	0	0	0	0	0	0
Prkab1	0	0	0	0	0	0	0	0	1.54487	0	1.63713	0	0	0	0	0	0	0	0	0	0	0	0	0	0	0
Prkcd	0	0	0	0	0	0	0	0	0	0	0	0	0	0	0	0	0	0	0	0	0	1.73502	0	0	0	0
Prkcq	0	0	0	0	0	0	0	0	3.48627	0	0	0	0	0	0	0	0	0	0	0	0	0	0	0	0	0
Prkd2	0	0	0	0	0	0	1.03295	1.24377	0	0	0	0	0	0	0	0	0	0	0	0	0	0	0	0	0	0
Pros1	1.70107	0	0	0	0	0	2.40426	0	0	0	0	0	0	0	0	0	0	0	0	0	0	0	0	0	0	0
Prr13	0	0	1.24418	0	0	0	0	0	0	0	0	0	0	1.46086	0	0	0	0	0	0	0	0	0	0	0	0
Prrg1	0	0	2.13279	1.42956	0	0	0	0	0	0	0	0	0	0	0	0	0	0	0	0	0	0	0	0	0	0
Prrg4	0	0	2.06372	0	0	0	0	0	0	0	0	0	0	0	0	0	0	0	0	0	0	0	0	0	0	0
Prss23	0	0	0	0	0	0	0	0	0	0	0	0	0	0	0	0	0	0	0	2.13522	0	0	0	0	0	0
Prune2	0	0	0	0	0	0	1.7925	0	0	0	0	0	0	0	0	0	0	0	0	0	0	0	0	0	0	0
Psap	0	1.34034	1.20355	1.23732	0	0	0	0	0	0	0	0	0	0	0	1.27983	0	0	0	0	0	0	0	0	0	0
Psd3	0	0	4.09092	1.1643	0	0	0	0	0	0	0	0	0	0	0	0	0	0	0	0	0	0	0	0	0	0
Psenen	0	0	0	0	0	0	0	0	0	0	0	0	0	1.03439	0	0	0	0	0	0	0	0	0	0	0	0
Psma1	0	0	1.10498	1.06584	0	0	0	0	0	0	1.61305	1.4067	0	1.4417	0	0	0	0	0	1.26818	0	0	0	0	0	0
Psma4	0	0	0	0	0	0	0	0	0	0	0	0	0	1.33464	0	0	0	0	0	0	0	0	0	0	0	0
Psma5	0	0	1.09692	1.30144	0	0	1.2785	1.15973	0	0	0	1.5275	0	1.74378	0	0	0	0	0	0	0	0	0	0	0	0
Psma7	0	0	1.11804	1.15863	0	0	0	0	0	0	1.77337	0	0	1.47897	0	0	0	0	0	0	0	0	0	0	0	0
Psmb10	4.43983	4.32759	5.25468	4.69474	0	3.59433	3.47459	4.37796	4.0166	3.18226	4.32567	3.90708	3.73285	4.36362	0	4.16953	4.20946	3.96154	0	1.69677	0	2.90845	0	0	0	0
Psmb4	0	0	0	1.19098	0	0	0	0	0	0	0	1.31595	0	1.34406	0	0	0	0	0	0	0	0	0	0	0	0
Psmb5	0	0	0	1.35346	0	0	0	0	0	0	0	1.31363	0	1.52779	0	0	0	0	0	0	0	0	0	0	0	0
Psmb6	0	0	0	0	0	0	0	0	0	0	0	1.42964	0	1.2789	0	0	0	0	0	0	0	0	0	0	0	0
Psmb8	6.40434	7.32537	6.78574	6.72319	5.21843	5.75108	6.53086	7.22762	6.70993	8.31552	6.58354	6.07637	5.36375	5.23727	6.9428	7.00585	6.48824	8.33121	2.3305	2.6121	3.6279	4.96785	0	0	0	4.20064
Psmb9	6.54336	6.88416	6.13135	6.92975	0	5.43806	5.13557	6.21408	5.58754	5.92112	4.71225	5.38207	4.36698	5.00825	6.426	6.27454	6.74104	4.84471	2.60061	2.21231	0	4.21697	0	0	0	6.74657
Psme1	1.98245	2.27734	3.37061	2.72903	0	1.9479	2.00867	1.7869	2.41757	1.81064	3.21064	2.35361	1.88156	2.03272	0	0	2.53431	2.22529	0	1.31634	0	1.50739	0	0	0	0
Psme2	0	0	0	0	0	0	0	0	5.22956	0	0	0	0	0	0	0	0	0	0	0	0	0	0	0	0	0
Psmg4	0	0	1.31213	1.54184	0	0	1.43508	0	0	0	0	0	0	1.81211	0	0	0	0	0	0	0	0	0	0	0	0
Ptbp3	0	0	1.84645	0	0	0	1.37552	0	0	0	1.0159	0	0	0	0	0	1.56465	0	0	0	0	0	0	0	0	0
Ptger4	0	0	0	0	0	0	1.7757	0	0	0	0	0	0	0	0	0	0	0	0	0	0	0	0	0	0	0
Pth1r	0	0	0	0	0	0	0	0	0	0	0	0	0	1.80848	0	0	0	0	0	0	0	0	0	0	0	0
Ptk7	0	0	0	0	0	0	1.13085	0	0	0	0	0	0	0	0	0	0	0	0	0	0	0	0	0	0	0
Ptma	0	0	1.09658	1.12939	0	0	0	0	0	0	1.50638	1.06835	0	0	0	0	0	0	0	0	0	1.0977	0	0	0	0
Ptp4a2	0	0	0	0	0	0	0	0	1.28891	0	1.86048	0	0	0	0	0	1.68992	0	0	0	0	0	0	0	0	0
Ptpn1	0	0	1.2081	0	0	0	0	0	0	0	0	0	0	0	0	0	0	0	0	0	0	0	0	0	0	0
Ptpn12	0	0	0	0	0	0	0	0	1.10587	0	0	0	0	0	0	0	0	0	0	0	0	0	0	0	0	0
Ptpn13	0	0	1.28683	0	0	0	0	0	1.3671	0	1.05555	0	0	0	0	0	0	0	0	0	0	0	0	0	0	0
Ptpn14	0	0	2.4287	0	0	0	0	0	0	0	0	0	0	0	0	0	0	0	0	0	0	0	0	0	0	0
Ptpn22	0	0	3.05663	0	0	0	0	0	0	0	0	0	0	0	0	0	0	0	0	0	0	0	0	0	0	0
Ptpn23	0	0	1.58024	0	0	0	0	0	0	0	0	0	0	0	0	0	0	0	0	0	0	0	0	0	0	0
Ptprc	0	0	0	0	0	0	3.11919	0	0	0	0	0	0	3.19705	0	0	0	0	0	6.2282	0	4.18514	0	0	0	0
Ptprcap	0	0	0	0	0	0	0	0	0	0	0	0	0	0	0	0	0	0	0	5.0201	0	0	0	0	0	0
Ptprh	0	0	0	0	0	0	0	0	0	0	0	0	0	1.48304	0	0	0	0	0	0	0	0	0	0	0	0
Pvr	0	0	1.64705	0	0	0	0	0	0	0	0	0	0	0	0	0	0	0	0	0	0	0	0	0	0	0
Pxk	0	0	1.29682	0	0	0	0	0	0	0	0	0	0	0	0	0	0	0	0	0	0	0	0	0	0	0
Pycard	0	0	3.31159	2.71784	0	0	1.62766	1.77829	1.97217	2.17662	2.44648	1.67223	2.71702	2.88709	0	0	0	0	0	3.54372	0	3.26825	0	0	0	0
Rab19	0	0	0	0	0	0	0	0	0	2.33796	0	0	0	0	0	0	0	0	0	0	0	0	0	0	0	0
Rab31	0	0	2.07183	0	0	0	0	0	0	0	0	0	0	0	0	0	0	0	0	0	0	0	0	0	0	0
Rab32	0	0	0	1.15461	0	0	0	0	0	0	0	0	0	0	0	0	0	0	0	0	0	0	0	0	0	0
Rab39	0	0	0	0	0	0	0	0	0	0	0	0	0	1.46291	0	0	0	0	0	0	0	0	0	0	0	0
Rab5c	0	0	0	0	0	0	0	0	0	1.38146	0	1.21407	1.28173	1.61344	0	0	0	0	0	0	0	0	0	0	0	0
Rac2	0	0	0	0	0	0	0	0	0	0	0	0	0	6.53189	0	0	0	0	0	5.7573	0	4.38173	0	0	0	0
Rack1	0	0	1.18049	1.05445	0	0	0	1.01241	0	0	1.56786	0	0	1.1881	0	0	0	0	0	1.07732	0	1.17235	0	0	0	0
Rad21	0	0	0	0	0	0	0	0	0	0	1.20009	0	0	0	0	0	0	0	0	0	0	0	0	0	0	0
Rad51b	0	0	2.74869	2.61741	0	0	0	0	0	0	0	0	0	0	0	0	0	0	0	0	0	0	0	0	0	0
Rai14	0	0	0	0	0	0	0	0	0	0	0	0	0	0	0	0	0	0	1.51655	1.05079	0	0	0	0	0	0
Ran	0	0	1.24944	0	0	0	0	0	0	0	0	0	0	0	0	0	0	0	0	0	0	0	0	0	0	0
Ranbp1	0	0	1.09296	1.30575	0	0	0	0	0	0	0	0	0	0	0	0	0	0	0	1.52304	0	0	0	0	0	0
Ranbp17	0	0	0	1.17711	0	0	0	0	0	0	0	0	0	0	0	0	0	0	0	0	0	0	0	0	0	0
Rapgef4	0	0	0	0	0	0	4.24226	0	0	0	0	0	0	0	0	0	0	0	0	0	0	0	0	0	0	0
Raph1	0	0	1.40661	0	0	0	0	0	0	0	0	0	0	0	0	0	0	0	0	0	0	0	0	0	0	0
Rasa4	0	0	4.27568	0	0	0	0	0	0	0	0	0	0	0	0	0	0	0	0	0	0	0	0	0	0	0
Rasal2	0	0	0	0	0	0	1.31638	0	0	0	0	0	0	0	0	0	0	0	0	0	0	0	0	0	0	0
Rasd1	0	0	0	0	0	0	5.51471	0	0	0	0	0	0	0	0	0	0	0	0	0	0	0	0	0	0	0
Rasgef1b	0	0	1.61568	0	0	0	0	0	0	0	0	0	0	0	0	0	0	0	0	0	0	0	0	0	0	0
Rasgrp1	0	0	0	0	0	0	1.44835	1.47272	6.33457	4.74807	0	0	0	0	0	0	0	0	0	0	0	0	0	0	0	0
Rasl11b	0	0	3.55896	0	0	0	0	0	0	0	0	0	0	0	0	0	0	0	0	0	0	0	0	0	0	0
Rbl1	0	0	2.21833	2.45704	0	0	1.36593	1.36647	2.47306	3.59836	0	0	0	0	0	0	0	0	0	1.61445	0	0	0	0	0	0
Rbp1	0	0	0	0	0	0	0	0	0	0	0	0	0	0	0	0	0	0	0	0	0	1.56151	0	0	0	0
Rbpms	0	0	1.8055	1.07247	0	0	0	0	0	0	0	0	0	0	0	0	0	0	0	0	0	0	0	0	0	0
Rcbtb1	0	0	1.33488	0	0	0	0	0	0	0	0	0	0	0	0	0	0	0	0	0	0	0	0	0	0	0
Rcc2	0	0	1.11758	0	0	0	0	0	0	0	0	0	0	0	0	0	0	0	0	0	0	0	0	0	0	0
Rcn1	0	0	2.60849	0	0	0	0	0	0	0	0	0	0	1.69992	0	0	0	0	0	0	0	2.05204	0	0	0	0
Rela	0	0	1.53849	0	0	0	0	0	0	0	0	0	0	0	0	0	0	0	0	0	0	0	0	0	0	0
Relb	0	0	3.65792	2.28498	0	0	1.18931	0	2.53508	0	0	0	0	0	0	0	0	0	0	1.25755	0	0	0	0	0	0
Rell1	0	0	1.42399	0	0	0	1.53923	0	0	0	0	0	0	0	0	0	0	0	0	0	0	0	0	0	0	0
Rex1bd	0	0	0	1.00475	0	0	0	0	0	0	0	0	0	1.49485	0	0	0	0	0	0	0	0	0	0	0	0
Rfx5	0	0	1.71075	0	0	0	0	0	0	0	0	0	0	0	0	0	0	0	0	0	0	0	0	0	0	0
Rgmb	0	0	1.1692	0	0	0	0	0	0	0	0	0	0	0	0	0	0	0	0	0	0	0	0	0	0	0
Rgs6	0	0	0	1.79398	0	0	0	0	0	0	0	0	0	0	0	0	0	0	0	0	0	0	0	0	0	0
Rgs7	0	0	5.96978	0	0	0	0	0	0	0	0	0	0	0	0	0	0	0	0	0	0	0	0	0	0	0
Rhbdf2	0	0	1.34862	0	0	0	0	0	0	0	0	0	0	0	0	0	0	0	0	0	0	0	0	0	0	0
Rhob	0	0	3.20606	2.28456	0	0	3.65033	0	0	0	4.22668	0	0	0	0	0	0	0	0	0	0	0	0	0	0	0
Rhobtb3	0	0	0	0	0	0	1.75487	0	0	0	0	0	0	0	0	0	0	0	0	0	0	0	0	0	0	0
Rhoc	0	0	1.72635	1.36359	0	0	1.90097	0	0	0	0	0	0	1.80883	0	0	0	0	0	0	0	0	0	0	0	0
Ripk2	0	0	1.27902	1.51314	0	0	0	0	0	0	0	0	0	0	0	0	0	0	0	1.4242	0	0	0	0	0	0
Rmdn3	0	0	1.17814	1.21336	0	0	0	0	0	0	0	0	0	0	0	0	0	0	0	0	0	0	0	0	0	0
Rmi2	0	0	0	0	0	0	0	0	0	0	0	0	0	0	0	0	0	0	0	3.58393	0	0	0	0	0	0
Rnd3	0	0	0	0	0	0	1.07281	0	0	0	0	0	0	0	0	0	0	0	0	0	0	0	0	0	0	0
Rnf114	0	0	1.01311	0	0	0	0	0	1.33187	0	0	0	0	0	0	0	0	0	0	0	0	0	0	0	0	0
Rnf135	0	0	1.19172	1.0895	0	0	0	0	0	0	0	0	0	0	0	0	0	0	0	0	0	0	0	0	0	0
Rnf145	0	0	0	0	0	0	1.24326	0	0	0	0	0	0	0	0	0	0	0	0	0	0	0	0	0	0	0
Rnf180	0	0	3.96458	2.45716	0	0	0	0	0	0	3.26742	0	0	0	0	0	0	0	0	0	0	0	0	0	0	0
Rnf183	0	0	1.41934	0	0	0	0	0	0	0	0	0	0	0	0	0	0	0	0	0	0	0	0	0	0	0
Rnf19a	0	0	0	0	0	0	1.14337	0	1.00327	0	1.23029	0	0	0	0	0	0	0	0	0	0	0	0	0	0	0
Rnf19b	0	0	3.39114	2.60349	0	1.45815	2.48425	1.59978	1.92509	1.68214	2.39117	2.81041	0	0	0	0	0	0	2.78066	1.66484	0	3.1879	0	0	0	0
Rnf213	2.336	2.19646	3.14001	2.53796	0	2.49081	2.13667	2.33662	2.90015	1.94408	2.90973	2.16116	2.52153	2.6938	3.56904	3.50027	3.48676	2.98162	1.68196	1.20523	0	1.01544	0	0	0	0
Rnf217	0	0	1.23487	0	0	0	1.11437	0	1.31393	0	0	0	0	0	0	0	0	0	0	0	0	0	0	0	0	0
Rnf31	0	0	1.03856	1.00673	0	0	0	0	0	0	0	0	0	0	0	0	0	0	0	0	0	0	0	0	0	0
Rnh1	0	0	0	0	0	0	0	0	0	0	0	0	0	1.13659	0	0	0	0	0	0	0	0	0	0	0	0
Rock2	0	0	1.51484	0	0	0	0	0	0	0	0	0	0	0	0	0	0	0	0	0	0	0	0	0	0	0
Rpl10a	0	0	1.20181	0	0	0	0	0	1.17202	0	1.35327	0	0	0	0	0	0	0	0	0	0	0	0	0	0	0
Rpl11	0	0	1.3621	1.15994	0	0	0	0	0	0	1.71913	1.0926	0	1.0365	0	0	0	0	0	1.09789	0	1.02841	0	0	0	0
Rpl12	0	0	1.23914	1.26561	0	0	0	1.07745	0	0	0	0	0	1.27244	0	0	0	0	0	1.37573	0	0	0	0	0	0
Rpl14	0	0	1.07458	1.39348	0	0	0	1.19083	0	1.24315	1.05107	1.40133	0	1.85041	0	0	0	1.45194	0	1.0732	0	1.22013	0	0	0	0
Rpl17	0	0	1.14335	1.39548	0	0	0	1.07464	0	1.31299	0	1.02548	0	1.44829	0	1.55036	0	0	0	1.01911	0	1.50113	0	0	0	0
Rpl18	0	0	1.52601	1.54757	0	0	0	1.044	1.09984	1.00862	1.2659	0	0	1.31473	0	1.56583	0	0	0	0	0	1.12026	0	0	0	0
Rpl18a	0	0	1.35656	1.13828	0	0	1.13467	1.09468	0	0	1.31504	0	0	1.2488	0	0	0	0	0	0	0	1.29559	0	0	0	0
Rpl19	0	0	1.13114	1.14359	0	0	0	0	1.04274	0	1.11412	0	0	1.10277	0	1.28296	1.58545	1.14451	0	0	0	1.32581	0	0	0	0
Rpl21	0	0	0	3.41734	0	0	0	2.60926	0	3.68585	0	2.28145	0	2.20264	0	0	0	0	0	4.17139	0	4.39618	0	0	0	0
Rpl22	0	0	1.15442	1.19967	0	0	0	1.26889	0	1.20515	0	1.38879	0	1.39131	0	0	0	1.22128	0	1.36284	0	1.24159	0	0	0	0
Rpl22l1	0	0	1.1216	0	0	0	0	0	0	0	0	0	0	0	0	0	0	0	0	0	0	0	0	0	0	0
Rpl23	0	0	1.08396	0	0	0	0	0	0	0	1.24818	0	0	0	0	1.00949	0	0	0	0	0	1.09536	0	0	0	0
Rpl24	0	0	1.34971	1.08456	0	0	0	0	0	0	1.16034	0	0	0	0	0	0	0	0	0	0	1.13632	0	0	0	0
Rpl26	0	0	0	1.39179	0	0	0	0	0	1.18951	0	0	0	1.19647	0	0	0	0	0	1.14136	0	1.79252	0	0	0	0
Rpl27-ps3	0	0	0	1.37692	0	0	0	1.03316	0	1.01872	0	1.37947	0	1.45449	0	1.80631	0	1.50216	0	1.19154	0	1.42821	0	0	0	2.0992
Rpl27a	0	1.61839	1.40952	1.3557	0	1.00414	1.14184	1.35846	1.14284	1.43365	1.6513	1.40606	0	1.62813	0	0	0	1.59985	0	1.17113	0	1.54286	0	0	0	0
Rpl28	0	0	0	0	0	0	0	0	0	0	1.02988	0	0	1.02065	0	0	0	1.00797	0	0	0	1.11051	0	0	0	0
Rpl29	0	0	0	4.82942	0	3.74302	0	4.01668	0	0	0	3.64314	0	3.47318	0	0	0	0	0	5.64166	0	4.47901	0	0	0	0
Rpl30	0	0	1.46992	0	0	0	1.24354	0	0	0	0	0	0	0	0	0	0	0	0	0	0	0	0	0	0	0
Rpl32	0	0	1.39182	1.42167	0	0	0	1.1901	1.04262	1.68088	1.62921	1.69748	0	1.26877	0	1.09197	0	1.7217	0	1.13988	0	1.64379	0	0	0	0
Rpl34	0	0	0	0	0	0	0	0	0	0	0	0	0	1.02288	0	0	0	0	0	0	0	0	0	0	0	0
Rpl36al	0	0	0	1.00773	0	0	0	0	0	0	0	0	0	0	0	0	0	0	0	0	0	0	0	0	0	0
Rpl37	0	0	1.09197	0	0	0	0	0	0	0	0	0	0	0	0	0	0	0	0	0	0	0	0	0	0	0
Rpl38	0	0	0	0	0	0	0	0	0	0	0	0	0	1.10123	0	0	0	0	0	0	0	0	0	0	0	0
Rpl39	0	0	1.65574	1.36812	0	0	0	1.38495	1.76561	1.33187	0	0	0	1.27821	0	0	0	0	0	0	0	1.21394	0	0	0	0
Rpl4	0	0	0	1.18928	0	0	0	1.2536	0	1.44581	0	0	0	1.56426	0	0	0	0	0	1.28686	0	1.42078	0	0	0	0
Rpl41	0	0	0	0	0	0	0	0	0	0	0	0	0	1.11206	0	1.07781	0	1.05295	0	0	0	1.34239	0	0	0	0
Rpl6	0	0	0	0	0	0	0	0	1.18296	0	1.15787	0	0	0	0	0	0	0	0	0	0	1.10183	0	0	0	0
Rpl7	0	0	1.21205	1.30925	0	0	0	0	0	0	1.73259	0	0	0	0	1.36446	0	0	0	1.10748	0	1.28364	0	0	0	0
Rpl8	0	0	1.00721	0	0	0	0	0	0	0	0	0	0	0	0	0	0	0	0	0	0	0	0	0	0	0
Rpl9-ps6	0	0	1.59866	1.35529	0	0	1.03601	1.0048	1.22119	1.71231	1.49382	1.42862	0	1.12007	0	1.14934	0	1.38939	0	0	0	1.39873	0	0	0	0
Rplp0	0	0	1.18678	1.31487	0	0	0	0	1.14752	1.09637	1.21184	1.02779	0	1.14328	0	0	0	1.308	0	1.25276	0	1.51972	0	0	0	0
Rplp1	0	1.15898	0	1.47421	0	1.03493	0	1.33967	0	1.46362	1.04407	1.4552	0	1.44304	0	1.41597	0	1.25449	0	1.00593	0	1.59295	0	0	0	0
Rpn1	0	0	0	1.0015	0	0	0	0	0	0	0	1.42301	0	1.40106	0	0	0	0	0	0	0	1.5635	0	0	0	0
Rps10	0	0	1.62268	1.09838	0	0	0	0	1.27384	1.00731	1.66467	1.1815	0	0	0	0	0	0	0	0	0	1.55966	0	0	0	0
Rps11	0	0	1.38497	1.30357	0	0	1.07183	1.03548	1.41409	1.49539	1.29814	1.08235	0	1.33774	0	0	0	0	0	1.02931	0	1.40984	0	0	0	0
Rps12-ps3	0	0	1.98213	1.2375	0	0	1.91773	1.2223	1.71694	0	2.54339	1.3753	0	0	0	0	0	1.88084	0	0	0	1.68722	0	0	0	0
Rps13	0	0	0	0	0	0	0	0	0	0	0	0	0	1.81847	0	0	0	0	0	0	0	0	0	0	0	0
Rps14	0	0	1.3633	1.02982	0	0	1.03634	0	1.25305	1.05398	1.3203	1.05859	0	1.03047	0	0	0	0	0	0	0	1.10201	0	0	0	0
Rps15	0	0	0	1.00213	0	0	0	0	0	1.0153	0	0	0	1.0939	0	1.0486	0	0	0	0	0	1.29711	0	0	0	0
Rps15a	0	0	1.36696	1.20381	0	0	0	0	0	0	0	1.51011	0	0	0	0	0	0	0	0	0	0	0	0	0	0
Rps16	0	0	1.12222	1.21198	0	0	0	0	0	1.47713	1.24744	1.21882	0	1.39598	0	0	0	1.28612	0	0	0	1.30897	0	0	0	0
Rps18	0	0	0	1.49386	0	0	0	1.51739	0	0	0	0	0	0	0	0	0	0	0	2.47559	0	0	0	0	0	0
Rps19	0	0	0	1.23689	0	0	0	1.27594	0	1.50642	1.25432	1.53233	0	1.57086	0	1.85308	0	1.57242	0	0	0	1.68589	0	0	0	0
Rps20	0	0	1.7862	1.69374	0	0	1.23488	1.30396	1.24055	1.43975	1.21946	1.46046	0	1.59796	0	1.61522	1.61373	1.66895	0	1.18596	0	1.45929	0	0	0	0
Rps23	0	0	1.18475	1.20634	0	0	0	1.14772	0	1.16234	1.32874	1.15641	0	1.42992	0	1.36278	0	1.74833	0	0	0	1.34583	0	0	0	0
Rps24	0	0	1.73584	1.28333	0	0	1.00778	0	0	1.02836	1.62913	1.07412	0	0	0	0	1.93496	1.16609	0	0	0	1.1587	0	0	0	0
Rps25	0	0	0	0	0	0	0	0	0	1.27942	0	1.33057	0	1.01428	0	0	0	1.34352	0	0	0	1.2329	0	0	0	0
Rps26	0	0	1.0558	1.1618	0	0	0	0	0	0	0	1.47751	0	1.02331	0	0	0	0	0	0	0	1.49809	0	0	0	0
Rps27a	0	0	1.35989	1.21719	0	0	1.13751	1.11135	1.19077	1.18585	1.65174	1.21397	0	1.28861	0	1.287	0	1.14907	0	0	0	1.34446	0	0	0	0
Rps27l	0	0	0	1.05016	0	0	0	0	0	0	0	1.67709	0	1.45472	0	0	0	0	0	0	0	0	0	0	0	0
Rps27rt	0	0	1.04638	1.19163	0	0	0	1.13558	0	0	1.37245	1.07688	0	1.25255	0	1.17129	0	1.15039	0	0	0	1.11251	0	0	0	0
Rps28	0	0	0	0	0	0	0	0	0	0	0	0	0	1.19128	0	0	0	0	0	0	0	0	0	0	0	0
Rps29	0	1.3249	1.6895	1.19281	0	0	1.11078	0	1.45813	1.33324	1.69901	1.28839	0	1.31528	0	1.00158	1.86261	1.27344	0	0	0	1.34175	0	0	0	0
Rps3	0	0	1.02492	1.17809	0	0	0	0	0	1.04499	1.2946	0	0	1.16172	0	1.25295	0	0	0	1.15203	0	1.51079	0	0	0	0
Rps3a1	0	0	1.29437	0	0	0	0	0	0	0	0	0	0	0	0	0	0	0	0	0	0	1.07537	0	0	0	0
Rps4x	0	0	1.74601	1.23088	0	0	1.08788	1.14126	1.28591	1.1099	2.18202	1.11868	1.1089	1.21666	0	1.34991	0	0	0	0	0	1.17768	0	0	0	0
Rps5	0	0	1.62993	1.36399	0	0	1.19433	1.17734	1.06715	1.23738	1.91188	1.4279	0	1.21434	0	0	0	1.36118	0	0	0	1.3788	0	0	0	0
Rps6	0	0	1.31625	1.04439	0	0	0	0	0	0	0	0	0	1.25651	0	0	0	0	0	1.09469	0	1.28983	0	0	0	0
Rps6ka1	0	0	0	0	0	0	0	1.39725	0	0	0	0	0	0	0	0	0	0	0	0	0	0	0	0	0	0
Rps7	0	0	1.18706	0	0	0	0	0	0	0	0	0	0	0	0	0	0	0	0	0	0	0	0	0	0	0
Rps8	0	0	1.1347	1.00577	0	0	0	0	0	0	1.18308	0	0	1.0607	0	0	0	1.15528	0	0	0	0	0	0	0	0
Rps9	0	0	1.56472	1.18905	0	0	0	0	1.10525	1.12584	1.45589	0	0	1.06118	0	0	1.67544	1.49931	0	0	0	1.21425	0	0	0	0
Rpsa	0	0	1.08355	1.24545	0	0	0	1.27155	0	1.26325	1.02279	1.22149	0	1.60119	0	1.35307	0	1.19566	0	1.09419	0	1.45835	0	0	0	0
Rras	0	0	2.91845	0	0	0	0	0	0	0	0	0	0	0	0	0	0	0	0	0	0	0	0	0	0	0
Rrm2b	0	0	0	0	0	0	0	0	0	0	0	0	0	0	0	0	0	1.08677	0	0	0	1.20514	0	0	0	0
Rsad2	0	0	4.37718	0	0	0	2.44684	0	4.46012	0	0	0	0	0	0	0	7.07134	0	0	0	0	0	0	0	0	0
Rsf1os1	0	0	1.27066	0	0	0	0	0	0	0	0	0	0	0	0	0	0	0	0	0	0	0	0	0	0	0
Rsf1os2	0	0	1.08398	0	0	0	0	0	0	0	0	0	0	0	0	0	0	0	0	0	0	0	0	0	0	0
Rtn4	0	0	1.84218	0	0	0	1.2771	0	1.86803	0	2.04441	0	0	0	0	0	0	0	2.07488	0	0	0	0	0	0	0
Rtp4	0	2.94004	4.58242	3.37741	0	3.84069	4.22917	4.23794	7.19877	3.90985	3.64682	2.83514	0	3.30819	0	3.43495	3.16152	4.60718	0	0	0	0	0	0	0	0
Rtraf	0	0	0	0	0	0	0	0	0	0	0	1.04798	0	0	0	0	0	0	0	0	0	0	0	0	0	0
Runx1	0	0	5.25236	0	0	0	3.91282	0	5.98267	0	0	0	0	2.63219	0	0	0	0	0	3.07636	0	4.158	0	0	0	0
S100a1	0	0	0	1.20646	0	0	0	0	0	1.2894	1.13614	1.33955	0	1.17783	0	0	0	0	0	0	0	0	0	0	0	0
S100a10	0	0	2.55283	1.72832	0	1.60935	1.88835	1.96728	1.96222	2.40212	2.77678	2.7667	1.92802	2.24521	0	2.0465	0	0	0	1.37432	2.49878	1.58021	0	0	0	0
S100a11	0	0	2.25953	2.12552	0	0	1.6852	1.6381	1.74367	1.82525	2.21208	2.5453	0	1.51638	0	1.42043	0	0	0	1.57233	0	2.01516	0	0	0	0
S100a13	0	0	1.32743	0	0	0	0	0	0	0	0	0	0	0	0	0	0	0	0	0	0	0	0	0	0	0
S100a16	0	0	1.33643	0	0	0	0	1.38707	0	0	0	0	0	1.30199	0	0	0	0	0	0	0	0	0	0	0	0
S100a4	0	0	0	5.56616	0	0	0	3.48894	0	0	0	0	0	0	0	0	0	0	0	2.14698	0	0	0	0	0	0
S100a6	0	0	3.22768	1.95848	0	0	2.82323	1.8724	2.56428	2.03609	4.5251	2.98979	0	1.9365	0	0	2.70028	1.89246	1.62762	1.20935	0	1.56307	0	0	0	0
Samd4	0	0	2.55944	0	0	0	1.99404	0	2.30482	0	0	0	0	0	0	0	0	0	0	0	0	0	0	0	0	0
Samd5	0	0	0	0	0	0	1.88662	0	5.29795	0	6.61062	0	0	0	0	0	0	0	0	0	0	0	0	0	0	0
Samd9l	0	0	0	0	0	0	0	0	1.43639	1.08127	2.10008	0	0	0	0	0	1.80755	0	0	0	0	1.53767	0	0	0	0
Samhd1	2.79356	0	3.1917	2.78093	0	2.32458	2.05604	2.11527	3.15599	2.06923	3.5033	2.01553	2.66098	1.53994	0	2.97601	3.22289	2.23627	2.30209	2.11749	3.63734	1.98852	0	0	0	0
Sap18b	0	0	0	0	0	0	0	0	0	0	0	0	0	1.58353	0	0	0	0	0	0	0	0	0	0	0	0
Sash1	0	0	1.72235	1.37995	0	0	0	0	0	0	0	0	0	2.30577	0	0	0	0	0	0	0	0	0	0	0	0
Sat1	0	0	0	0	0	0	1.63838	0	2.10258	0	2.23181	0	2.03543	0	0	0	0	0	0	0	0	0	0	0	0	0
Sav1	0	0	2.0484	0	0	0	0	0	0	0	0	0	0	0	0	0	0	0	0	0	0	0	0	0	0	0
Sbno2	0	0	1.98078	1.55776	0	0	1.4929	0	0	0	0	0	0	0	0	0	0	0	3.06813	1.34174	0	0	0	0	0	0
Scand1	0	0	0	0	0	0	0	0	0	0	1.41865	1.11194	0	1.58223	0	0	0	1.11658	0	0	0	0	0	0	0	0
Scin	0	0	3.56704	1.60188	0	0	0	0	2.42861	0	1.38717	0	0	0	0	0	0	0	0	0	0	0	0	0	0	0
Scube1	0	0	0	0	0	0	0	0	0	0	0	0	0	0	0	0	0	0	0	0	0	2.50488	0	0	0	0
Sdc1	0	0	0	0	0	0	0	0	0	0	0	0	0	2.5942	0	0	0	0	0	0	0	0	0	0	0	0
Sdc4	0	0	0	0	0	0	0	0	0	0	0	0	0	1.74546	0	0	0	0	0	1.24383	0	0	0	0	0	0
Sdk1	0	0	3.13768	1.33311	0	0	0	0	0	0	0	0	0	0	0	0	0	0	0	0	0	0	0	0	0	0
Sec61a1	0	0	0	0	0	0	0	0	0	0	0	0	0	1.03991	0	0	0	0	0	0	0	1.442	0	0	0	0
Sec61b	0	0	0	1.34912	0	0	0	1.10857	0	0	0	0	0	1.29437	0	0	0	0	0	0	0	0	0	0	0	0
Sectm1a	0	0	4.20471	0	0	0	0	0	0	0	0	0	0	0	0	0	0	0	0	0	0	0	0	0	0	0
Sectm1b	0	0	2.14376	2.33963	0	0	0	0	0	0	0	0	0	0	0	0	0	0	0	0	0	0	0	0	0	0
Selenok	0	1.61325	0	0	0	0	0	0	0	0	0	0	0	1.0617	0	0	0	0	0	0	0	0	0	0	0	0
Selenom	0	0	1.18852	1.14913	0	0	0	0	0	0	0	0	0	0	0	0	0	0	0	0	0	0	0	0	0	0
Selenot	0	0	0	0	0	0	0	0	0	0	0	0	0	1.0424	0	0	0	0	0	0	0	0	0	0	0	0
Selenow	0	0	2.3777	1.95332	0	0	0	1.21798	0	0	1.93434	0	0	1.26885	0	0	0	0	0	0	0	0	0	0	0	0
Selplg	0	0	0	0	0	0	0	0	0	0	0	0	0	0	0	0	0	0	0	6.34495	0	0	0	0	0	0
Sema3c	0	0	1.63325	0	0	0	1.13636	0	2.99418	0	2.7301	0	0	0	0	0	0	0	0	0	0	0	0	0	0	0
Sema4b	0	0	1.38706	0	0	0	0	0	0	0	0	0	0	0	0	0	0	0	0	0	0	0	0	0	0	0
Sema5a	0	0	1.12058	1.22552	0	0	0	0	0	0	0	0	0	0	0	0	0	0	0	0	0	0	0	0	0	0
Sema6a	0	0	1.2981	0	0	0	0	0	0	0	0	0	0	0	0	0	0	0	0	0	0	0	0	0	0	0
Sema7a	0	0	0	0	0	0	0	0	0	0	0	0	0	0	0	0	0	0	0	1.36557	0	0	0	0	0	0
2011-09-01	0	0	1.11787	1.10253	0	0	0	0	0	0	0	0	0	0	0	0	0	0	0	0	0	0	0	0	0	0
2004-09-01	0	0	0	1.5214	0	0	0	0	0	0	0	0	0	0	0	0	0	0	0	0	0	0	0	0	0	0
2009-09-01	0	0	0	0	0	0	0	0	0	0	0	0	0	1.00293	0	0	0	0	0	0	0	0	0	0	0	0
Serf2	0	0	0	0	0	0	0	0	0	0	0	0	0	1.08739	0	0	0	0	0	0	0	1.16417	0	0	0	0
Serinc2	0	0	0	0	0	0	1.62829	0	0	0	2.32775	0	0	0	0	0	0	0	0	0	0	0	0	0	0	0
Serinc3	0	0	1.74392	0	0	0	0	0	1.24801	0	0	0	0	0	0	0	1.05186	0	0	0	0	0	0	0	0	0
Serpina10	0	0	5.62581	4.09447	0	2.67072	3.79187	3.12602	0	0	0	0	0	0	0	0	0	0	0	0	0	0	0	0	0	0
Serpina3f	0	0	0	0	0	0	0	0	0	0	0	0	0	0	0	0	0	0	0	6.38558	0	0	0	0	0	0
Serpina3g	0	0	0	0	0	0	7.43997	0	6.64634	0	4.55602	5.84985	5.74763	8.49979	0	0	0	0	0	6.09564	3.63095	7.24407	0	0	0	0
Serpinb9	0	0	4.86743	3.62217	0	2.65942	2.76855	2.65689	3.81616	2.04159	3.72574	2.9827	0	1.57378	2.33763	1.30867	3.73072	1.86775	0	1.94231	0	0	0	0	0	0
Serpine1	0	0	0	0	0	0	0	0	0	0	0	0	0	3.33042	0	0	0	0	0	3.27721	0	0	0	0	0	0
Serping1	4.60432	6.10778	7.12301	6.45952	0	3.94137	6.54496	5.24804	5.58309	4.26074	5.18461	5.61618	5.97825	5.46961	6.3142	5.34007	7.11674	4.21307	4.3951	4.01194	0	1.53306	0	0	0	0
Serpinh1	0	0	0	0	0	0	0	0	0	0	0	0	0	0	0	0	0	0	0	0	0	1.53795	0	0	0	0
Sesn3	0	0	1.15937	1.23728	0	0	0	0	0	0	0	0	0	0	0	0	0	0	0	0	0	0	0	0	0	0
Setd7	0	0	1.87448	1.62509	0	0	0	0	0	0	0	0	0	0	0	0	0	0	0	0	0	0	0	0	0	0
Sf3b5	0	0	1.37933	1.34385	0	0	0	1.05649	0	0	0	1.38956	0	0	0	0	0	0	0	1.3098	0	0	0	0	0	0
Sfn	0	0	0	0	0	0	1.72384	0	0	0	0	0	0	0	0	0	0	0	0	0	0	0	0	0	0	0
Sfr1	0	0	1.04402	0	0	0	0	0	0	0	0	0	0	0	0	0	0	0	0	0	0	0	0	0	0	0
Sgk1	0	0	0	0	0	0	0	0	0	0	2.0166	0	0	0	0	0	0	0	0	0	0	0	0	0	0	0
Sh2d4b	0	0	3.38995	1.91365	0	3.59659	5.41747	0	4.74291	0	0	0	0	0	0	0	0	0	0	0	0	0	0	0	0	0
Sh3bgrl3	0	0	3.75685	3.34244	0	0	3.04396	3.35007	2.46392	2.2808	2.55635	1.111	1.4394	1.75959	0	1.89267	3.13302	0	2.06008	2.0429	0	3.07848	0	0	0	0
Sh3bp2	0	0	1.8793	1.55334	0	0	0	0	0	0	0	0	0	0	0	0	0	0	0	0	0	0	0	0	0	0
Sh3bp4	0	0	2.00435	1.36457	0	0	0	0	0	0	0	0	0	0	0	0	0	0	0	0	0	0	0	0	0	0
Sh3d19	0	0	0	0	0	0	1.04638	0	0	0	0	0	0	0	0	0	0	0	0	0	0	0	0	0	0	0
Sh3rf1	0	0	0	0	0	0	0	0	1.15825	0	1.18847	0	0	0	0	0	1.59618	0	0	0	0	0	0	0	0	0
Sharpin	0	0	1.06402	0	0	0	0	0	0	0	0	0	0	0	0	0	0	0	0	0	0	0	0	0	0	0
Shisa4	0	0	0	0	0	0	2.2801	0	0	0	0	0	0	0	0	0	0	0	0	0	0	0	0	0	0	0
Shisa5	0	0	1.10308	1.18721	0	0	0	1.10524	0	0	0	0	0	1.45614	0	0	0	0	0	0	0	1.74269	0	0	0	0
Shtn1	0	0	1.23769	0	0	0	0	0	0	0	0	0	0	0	0	0	0	0	0	0	0	0	0	0	0	0
Sipa1l1	0	0	0	0	0	0	1.04923	1.1934	1.51205	0	0	0	0	0	0	0	0	0	0	0	0	0	0	0	0	0
Sirpa	0	0	0	0	0	0	0	0	0	0	0	0	0	1.93708	0	0	0	0	0	0	0	0	0	0	0	0
Skap1	0	0	0	0	0	0	0	0	0	0	0	0	0	0	0	0	0	0	0	3.07628	0	0	0	0	0	0
Skil	0	0	1.40277	0	0	0	0	0	0	0	0	0	0	0	0	0	0	0	0	0	0	0	0	0	0	0
Slc12a2	0	0	0	0	0	0	1.21058	0	0	0	0	0	0	0	0	0	0	0	0	0	0	0	0	0	0	0
Slc13a1	0	0	1.04182	0	0	0	0	0	0	0	0	0	0	2.52274	0	0	0	0	0	0	0	0	0	0	0	0
Slc14a2	0	0	0	0	0	2.95772	0	0	0	0	0	0	0	1.29894	0	0	0	0	0	0	0	0	0	0	0	0
Slc16a1	0	0	0	0	0	0	0	0	0	0	0	0	0	2.83691	0	0	0	0	0	0	0	0	0	0	0	0
Slc16a3	0	0	0	0	0	0	0	0	0	0	0	0	0	2.68588	0	0	0	0	0	0	0	0	0	0	0	0
Slc17a4	0	0	1.58396	0	0	0	0	0	0	0	0	0	0	0	0	0	0	0	0	0	0	0	0	0	0	0
Slc1a1	0	0	0	0	0	0	0	0	0	0	0	0	0	2.57484	0	0	0	0	0	0	0	0	0	0	0	0
Slc1a4	0	0	1.28626	1.44528	0	0	0	0	0	0	0	0	0	0	0	0	0	0	0	0	0	0	0	0	0	0
Slc20a1	0	0	1.11047	0	0	0	0	0	0	0	0	0	0	0	0	0	0	0	0	0	0	0	0	0	0	0
Slc22a15	0	0	0	0	0	0	0	0	3.23977	0	0	0	0	0	0	0	0	0	0	0	0	0	0	0	0	0
Slc22a21	0	0	0	0	0	0	0	0	0	0	0	0	0	2.12304	0	0	0	0	0	0	0	0	0	0	0	0
Slc24a5	0	0	1.29271	0	0	0	0	0	0	0	0	0	0	0	0	0	0	0	0	0	0	0	0	0	0	0
Slc25a21	0	0	0	0	0	0	0	0	1.43614	1.55745	0	0	0	0	0	0	0	0	0	0	0	0	0	0	0	0
Slc25a28	0	0	1.15004	0	0	0	0	0	0	0	0	0	0	1.41657	0	0	0	0	0	0	0	0	0	0	0	0
Slc25a30	0	0	0	0	0	0	0	0	3.25749	1.88257	0	1.16157	0	0	0	0	0	0	0	0	0	0	0	0	0	0
Slc27a2	0	0	0	0	0	0	0	0	0	0	0	0	0	1.89947	0	0	0	0	0	0	0	0	0	0	0	0
Slc2a6	0	0	0	0	0	0	0	0	0	0	0	0	0	3.12518	0	0	0	0	0	0	0	0	0	0	0	0
Slc30a1	0	0	0	1.0031	0	0	0	0	0	0	0	0	0	1.76822	0	0	0	0	0	0	0	0	0	0	0	0
Slc31a2	0	0	2.29848	1.32792	0	0	0	0	0	0	0	0	0	0	0	0	0	0	0	0	0	0	0	0	0	0
Slc34a2	0	0	5.69154	3.01088	0	0	2.05748	0	0	0	0	0	0	0	0	0	0	0	0	0	0	0	0	0	0	0
Slc35f5	0	0	1.0679	0	0	0	0	0	0	0	0	0	0	0	0	0	0	0	0	0	0	0	0	0	0	0
Slc37a1	0	0	0	0	0	0	1.13618	0	0	0	0	0	0	0	0	0	0	0	0	0	0	0	0	0	0	0
Slc38a2	0	0	2.14905	1.21561	0	0	0	0	0	0	1.80793	0	0	0	0	0	0	0	2.02138	0	0	0	0	0	0	0
Slc39a1	0	0	0	0	0	0	0	0	0	0	0	0	0	1.65954	0	0	0	0	0	0	0	0	0	0	0	0
Slc39a14	0	0	0	0	0	0	1.14161	0	0	0	0	0	0	0	0	0	0	0	0	0	0	0	0	0	0	0
Slc3a2	0	0	0	0	0	0	0	0	0	0	0	0	0	1.46144	0	0	0	0	0	0	0	0	0	0	0	0
Slc40a1	0	0	1.30206	0	0	0	0	0	0	0	0	0	0	0	0	0	0	0	0	0	0	0	0	0	0	0
Slc41a2	0	0	2.09362	2.15924	0	0	3.29081	0	0	0	0	0	0	1.12607	0	0	0	0	0	0	0	0	0	0	0	0
Slc44a3	0	0	5.49407	3.35508	0	0	0	0	0	0	0	0	0	0	0	0	0	0	0	0	0	0	0	0	0	0
Slc6a18	0	0	0	0	0	0	0	0	0	0	0	0	0	1.97909	0	0	0	0	0	0	0	0	0	0	0	0
Slc6a6	0	0	0	0	0	0	0	1.36537	0	0	0	0	0	0	0	0	0	0	0	0	0	0	0	0	0	0
Slc6a9	0	0	2.12759	0	0	0	0	0	0	0	0	0	0	0	0	0	0	0	0	0	0	0	0	0	0	0
Slc8a1	0	0	0	0	0	0	0	0	0	0	0	0	0	0	0	0	0	0	0	0	0	1.46755	0	0	0	0
Slc9a3r1	0	0	0	0	0	0	0	0	0	0	0	1.1442	0	1.27281	0	0	0	0	0	0	0	0	0	0	0	0
Slco1a1	0	0	0	2.9905	0	0	0	0	0	0	0	0	0	0	0	0	0	0	0	0	0	0	0	0	0	0
Slco2a1	0	0	1.03544	1.42919	0	0	0	0	0	0	0	0	0	2.25942	0	0	0	0	0	0	0	0	0	0	0	0
Slco3a1	0	0	1.91656	0	0	0	0	0	0	0	0	0	0	0	0	0	0	0	1.70553	0	0	0	0	0	0	0
Slco4a1	0	0	0	0	0	0	0	0	0	0	2.52573	0	0	0	0	0	0	0	0	0	0	0	0	0	0	0
Slfn2	0	0	0	0	0	0	0	0	0	0	5.48114	0	0	2.08031	0	0	0	0	0	0	0	4.29831	0	0	0	0
Slx4	0	0	1.03494	0	0	0	1.12078	0	0	0	0	0	0	0	0	0	0	0	0	0	0	0	0	0	0	0
Smad1	0	0	0	0	0	0	0	0	1.54869	0	0	0	0	0	0	0	0	0	0	0	0	0	0	0	0	0
Smad2	0	0	1.20791	1.23995	0	0	0	0	0	0	0	0	0	0	0	0	0	0	0	0	0	0	0	0	0	0
Smagp	0	0	1.20038	0	0	0	0	0	0	0	0	0	0	0	0	0	0	0	0	0	0	0	0	0	0	0
Smchd1	0	0	0	0	0	0	1.2328	0	0	0	0	0	0	0	0	0	0	0	0	0	0	0	0	0	0	0
Snn	0	0	0	1.16529	0	0	0	0	0	0	0	0	0	0	0	0	0	0	0	0	0	0	0	0	0	0
Snrpd1	0	0	1.0479	0	0	0	0	0	0	0	0	0	0	0	0	0	0	0	0	1.04156	0	0	0	0	0	0
Snrpd2	0	0	0	1.05231	0	0	0	0	0	0	0	0	0	1.30254	0	0	0	0	0	0	0	0	0	0	0	0
Snrpg	0	0	1.04162	0	0	0	0	0	0	0	0	0	0	0	0	0	0	0	0	0	0	0	0	0	0	0
Snu13	0	0	1.19746	1.29719	0	0	0	0	0	0	0	0	0	0	0	0	0	0	0	0	0	0	0	0	0	0
Snx10	0	0	5.13808	3.53595	0	0	4.12996	0	4.1562	0	4.40582	0	3.13207	1.91881	0	0	3.02373	0	0	2.85063	0	3.04102	0	0	0	0
Snx18	0	0	0	0	0	0	0	0	0	0	0	0	0	1.46944	0	0	0	0	0	0	0	0	0	0	0	0
Socs1	0	0	8.48325	7.76736	0	3.09859	5.39132	5.80206	7.10124	6.52081	3.97467	4.36381	6.27417	5.53035	0	5.23382	3.93818	5.07322	0	2.36225	0	3.53011	0	0	0	0
Socs2	0	0	1.0278	1.41366	0	0	2.24069	0	0	0	0	0	0	0	0	0	0	0	0	0	0	0	0	0	0	0
Socs3	0	0	0	0	0	0	3.87686	0	0	0	0	0	0	0	0	0	0	0	0	0	0	0	0	0	0	0
Sorbs1	0	0	0	0	0	0	0	0	0	0	0	1.2766	0	0	0	0	0	0	0	0	0	0	0	0	0	0
Sorbs2	0	0	0	0	0	2.01834	1.08036	0	0	0	0	0	0	0	0	0	0	0	0	0	0	0	0	0	0	0
Sorbs2os	0	0	0	0	0	0	1.91367	0	1.63774	0	1.99808	0	0	0	0	0	0	0	0	0	0	0	0	0	0	0
Sorcs1	0	0	0	1.16989	0	0	0	0	0	0	0	0	0	0	0	0	0	0	0	0	0	0	0	0	0	0
Sox4	0	0	2.58284	0	0	0	0	0	0	0	2.74504	0	0	0	0	0	0	0	0	0	0	0	0	0	0	0
Sox9	0	0	0	0	0	0	0	0	0	0	5.63629	0	0	0	0	0	0	0	0	0	0	0	0	0	0	0
Sp100	0	0	0	0	0	0	4.15677	0	5.12887	0	0	0	0	4.10731	0	2.91538	4.95207	3.4611	0	0	0	0	0	0	0	0
Sp140	0	0	4.3078	0	0	0	3.1737	0	3.5981	0	3.5201	0	0	0	0	0	0	0	0	1.65626	0	0	0	0	0	0
Spag6l	0	0	1.12436	1.34272	0	0	0	0	0	0	0	0	0	1.14689	0	0	0	0	0	1.04263	0	0	0	0	0	0
Sparc	0	1.05499	2.74248	2.01213	0	0	3.47132	0	0	0	0	0	0	0	0	0	0	0	0	0	0	2.13576	0	0	0	0
Spata2	0	0	1.15322	0	0	0	0	0	0	0	0	0	0	0	0	0	0	0	0	0	0	0	0	0	0	0
Spata6	0	0	1.42071	0	0	0	0	0	0	0	0	0	0	0	0	0	0	0	0	0	0	0	0	0	0	0
Spats2l	0	0	0	0	0	0	1.94988	0	0	0	0	0	0	0	0	0	0	0	0	0	0	0	0	0	0	0
Specc1	0	0	2.7874	2.10011	0	0	0	0	0	0	0	0	0	0	0	0	0	0	0	0	0	0	0	0	0	0
Spin1	0	0	0	0	0	0	0	0	0	0	1.68911	0	0	0	0	0	0	0	0	0	0	0	0	0	0	0
Spink1	0	0	0	0	0	0	0	0	0	0	0	1.23655	0	2.18545	0	0	0	0	0	0	0	0	0	0	0	0
Spink10	0	0	0	0	0	0	0	0	3.25698	0	0	0	0	0	0	0	0	0	0	0	0	0	0	0	0	0
Spink8	0	0	0	0	0	0	0	0	0	0	2.54872	0	0	1.36133	0	0	0	0	0	0	0	0	0	0	0	0
Spns2	0	0	1.72785	0	0	0	3.52596	2.33309	6.37835	3.32135	3.13945	1.19622	0	0	0	0	0	0	0	0	0	0	0	0	0	0
Spns3	0	0	1.60431	1.3165	0	0	0	0	0	0	0	0	0	0	0	0	0	0	0	0	0	0	0	0	0	0
Spop	0	0	0	0	0	0	0	0	0	0	0	0	0	0	0	0	0	0	1.78491	1.29853	0	0	0	0	0	0
Spp1	2.68229	3.91121	3.15291	2.85353	0	1.77796	3.0454	2.69573	3.08349	3.01047	2.2794	2.33407	1.16607	1.93307	2.57165	3.40091	2.81815	2.54615	2.74182	2.87435	2.05653	3.48785	0	0	0	1.9543
Sppl2a	0	0	0	0	0	0	0	0	0	0	1.62265	1.2371	0	1.42878	0	0	0	0	0	0	0	0	0	0	0	0
Spsb1	0	0	0	0	0	0	0	0	0	0	0	0	0	0	0	0	0	0	0	1.79992	0	0	0	0	0	0
Sptlc2	0	0	1.07774	0	0	0	0	0	0	0	0	0	0	0	0	0	0	0	0	0	0	0	0	0	0	0
Sqle	0	0	1.19223	2.00411	0	0	0	0	0	1.73692	0	0	0	3.05913	0	0	0	0	0	0	0	3.17465	0	0	0	0
Sqstm1	0	0	0	0	0	0	0	0	0	0	0	0	0	1.15378	0	0	0	0	0	0	0	0	0	0	0	0
Srd5a1	0	0	1.16654	0	0	0	0	0	0	0	0	0	0	0	0	0	0	0	0	0	0	0	0	0	0	0
Srgap1	0	0	0	0	0	0	2.24853	0	0	0	0	0	0	0	0	0	0	0	0	0	0	0	0	0	0	0
Srgn	0	0	0	0	0	0	0	0	0	0	0	0	0	0	0	0	0	0	0	0	0	3.04548	0	0	0	0
Srl	0	0	0	1.24108	0	0	0	0	0	0	0	0	0	0	0	0	0	0	0	0	0	0	0	0	0	0
Srp14	0	0	0	1.12101	0	0	0	0	0	0	0	1.35624	0	0	0	0	0	0	0	0	0	0	0	0	0	0
Srp9	0	0	0	0	0	0	0	0	0	0	0	0	0	1.37363	0	0	0	0	0	0	0	0	0	0	0	0
Srxn1	0	0	1.81661	1.23643	0	0	0	0	0	0	0	0	0	0	0	0	0	0	0	0	0	0	0	0	0	0
Ss18l1	0	0	1.44211	0	0	0	0	0	0	0	0	0	0	0	0	0	0	0	0	0	0	0	0	0	0	0
Ssbp4	0	0	0	0	0	0	1.30181	0	0	0	0	0	0	0	0	0	0	0	0	0	0	0	0	0	0	0
Ssfa2	0	0	0	0	0	0	0	0	1.39228	0	0	0	0	0	0	0	0	0	0	0	0	0	0	0	0	0
Ssr3	0	0	0	0	0	0	0	0	0	0	0	0	0	0	0	0	0	0	0	0	0	1.332	0	0	0	0
St14	0	0	2.03336	1.80041	0	0	0	0	0	0	0	0	0	1.04437	0	0	0	0	0	0	0	0	0	0	0	0
St3gal1	0	0	0	0	0	0	4.52517	0	0	0	0	0	0	0	0	0	0	0	0	0	0	0	0	0	0	0
St3gal4	0	0	1.56369	0	0	0	0	0	1.98194	0	0	0	0	0	0	0	0	0	0	0	0	0	0	0	0	0
Stat1	4.74346	3.3966	4.58488	5.54691	4.72778	4.60286	4.41651	5.63814	5.79866	6.08629	4.74827	5.68594	3.96043	4.2952	4.33069	5.03891	5.15939	5.27606	2.58388	3.29047	3.39636	3.57442	0	0	0	5.13625
Stat2	3.00143	3.00686	2.32932	2.71281	0	3.18709	2.49896	2.99027	2.94676	2.92256	2.27139	2.83258	2.02975	2.04739	2.80799	3.00842	3.16468	2.27654	0	1.01901	0	1.25337	0	0	0	0
Stat3	0	0	1.93371	1.57348	0	1.18429	1.46812	1.1438	1.27477	0	1.14065	1.06375	1.27669	1.03095	0	0	1.27967	0	0	0	0	0	0	0	0	0
Steap1	0	0	2.85415	0	0	0	3.10811	0	0	0	0	0	0	0	0	0	0	0	0	0	0	0	0	0	0	0
Steap2	0	0	1.29196	0	0	0	0	0	0	0	0	0	0	1.58553	0	0	0	0	0	0	0	0	0	0	0	0
Stk17b	0	0	0	0	0	0	0	0	0	0	0	0	0	0	0	0	0	0	0	2.31516	0	1.37976	0	0	0	0
Stk32a	0	0	0	1.30522	0	0	0	1.55446	0	0	0	0	0	0	0	0	0	0	0	0	0	0	0	0	0	0
Stk32c	0	0	4.14408	0	0	0	0	0	0	0	0	0	0	0	0	0	0	0	0	0	0	0	0	0	0	0
Stk39	0	0	1.91306	0	0	0	0	0	0	0	0	0	0	0	0	0	0	0	0	0	0	0	0	0	0	0
Ston1	0	0	1.07683	0	0	0	0	0	0	0	0	0	0	0	0	0	0	0	0	0	0	0	0	0	0	0
Stra6l	0	0	2.29594	2.31621	0	0	0	0	0	0	0	0	0	0	0	0	0	0	0	0	0	0	0	0	0	0
Stxbp1	0	0	5.36597	0	0	0	0	1.32082	1.84776	0	2.43372	2.34629	0	0	0	0	0	0	0	0	0	0	0	0	0	0
Stxbp3	0	0	0	0	0	0	0	0	0	0	0	0	0	0	0	0	2.25665	0	0	0	0	0	0	0	0	0
Sub1	0	0	1.00746	1.1664	0	0	0	0	0	0	0	1.31098	0	0	0	0	0	0	0	0	0	0	0	0	0	0
Sult1d1	0	0	1.19018	0	0	0	1.01574	0	0	0	0	0	0	0	0	0	0	0	0	0	0	0	0	0	0	0
Sult5a1	0	0	0	0	0	0	0	0	0	0	0	0	0	0	4.82673	0	0	0	0	0	0	0	0	0	0	0
Sumf1	0	0	0	0	0	0	0	0	0	0	0	0	0	1.06123	0	0	0	0	0	0	0	0	0	0	0	0
Supt4a	0	0	1.20963	0	0	0	0	0	0	0	0	0	0	0	0	0	0	0	0	0	0	0	0	0	0	0
Surf4	0	0	0	0	0	0	0	0	0	0	0	0	0	1.33811	0	0	0	0	0	0	0	0	0	0	0	0
Susd1	0	0	3.20111	2.56603	0	2.1403	3.33437	0	0	0	0	0	0	0	0	0	0	0	0	0	0	0	0	0	0	0
Svil	0	0	0	0	0	0	1.76257	1.08058	1.4045	0	0	0	0	0	0	0	0	0	0	0	0	0	0	0	0	0
Svopl	0	0	0	0	0	0	1.35577	0	0	0	0	0	0	0	0	0	0	0	0	0	0	0	0	0	0	0
Syn2	0	0	0	0	0	0	0	0	1.7095	0	0	0	0	0	0	0	0	0	0	0	0	0	0	0	0	0
Syne1	0	0	2.12268	0	0	0	0	0	0	0	0	0	0	0	0	0	0	0	0	0	0	0	0	0	0	0
Syne2	0	0	1.17656	0	0	0	0	0	1.69666	0	1.06298	0	0	0	0	0	0	0	0	0	0	0	0	0	0	0
Synj2	0	0	0	0	0	0	0	0	0	0	0	0	0	0	0	0	0	0	0	0	0	1.96296	0	0	0	0
Syt1	0	0	0	1.27441	0	0	0	0	0	0	0	0	0	0	0	0	0	0	0	0	0	0	0	0	0	0
Syt12	0	0	1.81585	0	0	0	0	0	0	0	0	0	0	0	0	0	0	0	0	0	0	0	0	0	0	0
Syt14	0	0	1.0716	0	0	0	0	0	0	0	0	0	0	0	0	0	0	0	0	0	0	0	0	0	0	0
Syt2	0	0	5.82646	0	0	0	5.03371	2.13479	4.53249	0	2.34561	0	0	0	0	0	0	0	0	0	0	0	0	0	0	0
Tacc2	0	0	0	0	0	0	1.62253	0	0	0	0	0	0	0	0	0	0	0	0	0	0	0	0	0	0	0
Tacstd2	0	0	0	0	0	0	0	0	2.08948	1.63341	1.80482	1.63013	0	1.08656	0	0	0	0	0	0	0	0	0	0	0	0
Taf1c	0	0	0	1.10706	0	0	0	0	0	0	0	1.2064	0	1.51253	0	0	0	0	0	0	0	1.46289	0	0	0	0
Taf4b	0	0	1.21431	0	0	0	0	0	0	0	0	0	0	0	0	0	0	0	0	0	0	0	0	0	0	0
Tagln	0	0	0	0	0	0	0	0	0	0	0	0	0	0	0	0	0	0	0	0	0	2.10719	0	0	0	0
Tagln2	0	0	1.81217	1.91833	0	0	1.81506	2.00754	0	0	1.495	1.37104	0	2.6713	0	0	0	0	0	1.33834	0	0	0	0	0	0
Tap1	3.82238	4.6467	5.47955	6.67441	0	4.96246	4.55866	5.96847	5.20798	6.28973	4.6583	5.33296	4.00096	5.37969	4.36525	5.99377	5.95375	6.66307	2.01336	3.59477	0	5.44796	0	0	0	6.48731
Tap2	2.62086	4.60078	4.42629	4.42833	0	4.98818	2.88018	3.79547	3.5695	3.41527	3.45004	3.51636	2.62712	4.20439	0	3.81436	2.81313	4.28343	0	2.12177	0	2.63878	0	0	0	3.53487
Tapbp	2.53321	3.29299	3.51641	3.55702	0	2.2585	2.0404	2.56177	2.53693	3.20149	3.07793	2.95596	2.11268	2.60739	2.47669	3.73029	2.41992	3.04523	1.52175	1.88644	0	2.72391	0	0	0	2.64451
Tapbpl	0	0	2.47476	2.38006	0	2.99742	3.43463	3.38168	3.46364	4.34919	2.64789	3.03723	2.35566	3.70256	0	0	0	0	0	1.48134	0	0	0	0	0	0
Tbl1x	0	0	1.03235	0	0	0	0	0	0	0	0	0	0	0	0	0	0	0	0	0	0	0	0	0	0	0
Tbl3	0	0	1.54985	0	0	0	0	0	0	0	0	0	0	0	0	0	0	0	0	0	0	0	0	0	0	0
Tbrg1	0	0	1.30866	1.14508	0	0	1.50711	1.14497	0	0	0	0	0	0	0	0	0	0	0	0	0	0	0	0	0	0
Tcaf1	0	0	1.41906	0	0	0	0	0	0	0	0	0	0	0	0	0	0	0	0	0	0	0	0	0	0	0
Tceal9	0	0	2.45496	1.75055	0	0	1.22272	0	0	0	1.42001	0	0	0	0	0	0	0	0	0	0	0	0	0	0	0
Tcirg1	0	0	1.74042	0	0	0	1.14638	0	0	0	0	0	0	1.67487	0	0	0	0	0	0	0	0	0	0	0	0
Tec	0	0	0	0	0	0	1.54547	0	0	0	0	0	0	0	0	0	0	0	0	0	0	0	0	0	0	0
Tecpr2	0	0	0	0	0	0	0	0	0	0	0	1.02569	0	1.30466	0	1.48024	0	0	0	1.10366	0	1.6389	0	0	0	0
Tenm3	0	0	1.97918	1.5708	0	0	0	0	0	0	0	0	0	0	0	0	0	0	0	0	0	0	0	0	0	0
Tenm4	0	0	0	1.11438	0	0	0	0	0	0	0	0	0	0	0	0	0	0	0	0	0	0	0	0	0	0
Tes	0	0	1.81404	0	0	0	1.42756	0	0	0	0	0	0	0	0	0	0	0	0	0	0	0	0	0	0	0
Tfcp2l1	0	0	0	0	0	0	1.23036	0	1.31818	0	0	0	0	0	0	0	0	0	0	0	0	0	0	0	0	0
Tfdp1	0	0	0	0	0	0	0	0	0	0	0	0	0	0	0	0	0	0	0	2.17755	0	0	0	0	0	0
Tgfbi	0	0	0	0	0	0	0	0	0	0	0	0	0	0	0	0	0	0	0	7.09303	0	0	0	0	0	0
Tgfbr1	0	0	0	0	0	0	1.98675	0	1.5369	0	1.4059	0	0	0	0	0	0	0	0	0	0	0	0	0	0	0
Tgfbr2	0	0	1.12816	0	0	0	1.33223	0	0	0	0	0	0	0	0	0	0	0	0	0	0	0	0	0	0	0
Tgif1	0	0	1.81781	0	0	0	1.52094	0	0	0	0	0	0	0	0	0	0	0	0	0	0	0	0	0	0	0
Tgm2	0	0	1.07863	1.34146	0	2.28423	3.31685	2.82858	2.51851	0	0	0	3.03237	4.52743	0	0	0	0	0	1.36464	0	1.66839	0	0	0	0
Tgtp1	0	0	6.26687	0	0	0	0	0	0	0	0	0	0	0	0	0	0	0	0	0	0	0	0	0	0	0
Tgtp2	5.63747	6.00708	7.56357	9.45504	0	7.15075	8.78182	9.73374	7.53309	7.66651	6.91332	7.58195	0	7.48554	0	7.23295	6.18608	7.19675	0	3.70466	0	3.38414	0	0	0	0
Thbs1	0	0	0	0	0	0	0	0	0	0	0	0	0	0	0	0	0	0	0	0	0	2.48983	0	0	0	0
Thbs2	0	0	0	0	0	0	0	0	0	0	0	0	0	0	0	0	0	0	0	0	0	2.15101	0	0	0	0
Thsd7a	0	0	0	0	0	0	4.1192	1.64305	0	0	0	0	0	0	0	0	0	0	0	0	0	0	0	0	0	0
Tiam2	0	0	1.42333	0	0	0	0	0	0	0	0	0	0	0	0	0	0	0	0	0	0	0	0	0	0	0
Tifa	0	0	2.77595	0	0	0	0	0	0	0	0	0	0	0	0	0	0	0	0	0	0	0	0	0	0	0
Timd2	0	0	1.23217	1.65311	0	0	0	0	0	0	0	0	0	0	0	0	0	0	0	0	0	0	0	0	0	0
Timm13	0	0	0	0	0	0	0	0	0	0	0	1.27154	0	1.5163	0	0	0	0	0	0	0	0	0	0	0	0
Timm8b	0	0	0	0	0	0	0	0	0	0	0	0	0	1.28067	0	0	0	0	0	0	0	0	0	0	0	0
Timp1	0	0	0	0	0	0	0	0	0	0	0	0	0	0	0	0	0	0	0	0	0	6.0339	0	0	0	0
Timp3	0	1.68868	0	0	0	0	0	0	0	0	0	0	0	0	0	0	0	0	0	0	0	0	0	0	0	0
Tinag	0	0	0	0	0	0	0	0	2.17665	1.00221	0	0	0	2.42339	0	0	0	0	0	0	0	0	0	0	0	0
Tinagl1	0	0	5.16933	4.33536	0	1.41129	2.54287	1.29878	0	0	0	0	0	2.96775	0	0	0	0	0	0	0	0	0	0	0	0
Tipin	0	0	0	1.00843	0	0	0	0	0	0	0	0	0	0	0	0	0	0	0	0	0	0	0	0	0	0
Tlcd2	0	0	0	0	0	0	1.19898	0	1.78187	1.10937	0	0	0	0	0	0	0	0	0	0	0	0	0	0	0	0
Tlr3	0	0	2.89746	2.05227	0	0	0	0	0	0	0	0	0	0	0	0	0	0	0	0	0	0	0	0	0	0
Tmbim4	0	0	0	0	0	0	0	0	0	1.07395	0	0	0	1.11667	0	0	0	0	0	0	0	0	0	0	0	0
Tmc1	0	0	7.27656	6.08506	0	0	0	0	0	0	0	0	0	0	0	0	0	0	0	0	0	0	0	0	0	0
Tmcc3	0	0	2.70013	1.04221	0	0	0	0	0	0	0	0	0	0	0	0	0	0	0	0	0	0	0	0	0	0
Tmco4	0	0	1.29523	0	0	0	0	0	0	0	0	0	0	0	0	0	0	0	0	0	0	0	0	0	0	0
Tmed2	0	0	0	0	0	0	0	0	0	0	0	0	0	0	0	0	0	0	0	0	0	1.57809	0	0	0	0
Tmem140	0	0	2.46252	1.64619	0	3.5564	2.54423	2.79199	2.16644	2.70801	2.49411	2.36611	0	3.36121	0	0	4.81946	2.77307	0	0	0	0	0	0	0	0
Tmem160	0	0	1.18277	1.23638	0	0	0	0	0	0	0	0	0	0	0	0	0	0	0	0	0	0	0	0	0	0
Tmem165	0	0	1.24035	0	0	0	0	0	0	0	0	0	0	0	0	0	0	0	0	0	0	0	0	0	0	0
Tmem173	0	0	0	0	0	0	0	0	0	0	0	0	0	2.35701	0	0	0	0	0	3.6829	0	0	0	0	0	0
Tmem176a	0	2.1699	0	1.56919	0	1.38052	0	1.67884	0	2.00744	0	1.82273	0	1.37822	0	1.60867	0	2.05298	0	1.35522	0	1.37103	0	0	0	0
Tmem176b	0	0	1.24794	1.68525	0	1.44671	0	1.5712	1.15099	1.74941	1.42933	1.79855	0	1.76898	0	1.89081	0	1.60901	0	1.34831	0	1.63643	0	0	0	0
Tmem184b	0	0	1.48644	0	0	0	0	0	0	0	0	0	0	0	0	0	0	0	0	0	0	0	0	0	0	0
Tmem205	0	0	0	0	0	0	0	0	0	0	0	1.13759	0	0	0	0	0	0	0	0	0	0	0	0	0	0
Tmem213	0	0	1.03986	0	0	0	0	0	0	0	0	0	0	0	0	0	0	0	0	0	0	0	0	0	0	0
Tmem252	0	0	3.09467	0	0	0	3.2987	0	2.65326	0	3.33529	2.95971	0	0	0	0	0	0	0	0	0	0	0	0	0	0
Tmem256	0	0	0	0	0	0	0	0	0	0	0	0	0	1.06519	0	0	0	0	0	0	0	0	0	0	0	0
Tmem37	0	0	1.01258	0	0	0	0	1.26069	0	0	0	0	0	0	0	0	0	0	0	0	0	0	0	0	0	0
Tmem45b	0	0	1.06648	0	0	0	0	0	0	2.45379	0	0	0	0	0	0	0	0	0	0	0	0	0	0	0	0
Tmem50a	0	0	1.23363	0	0	0	0	0	0	0	0	0	0	0	0	0	0	0	0	0	0	0	0	0	0	0
Tmem51	0	0	0	0	0	0	0	0	0	0	0	0	0	0	0	0	0	0	0	1.9599	0	0	0	0	0	0
Tmem65	0	0	1.18672	0	0	0	0	0	0	0	0	0	0	0	0	0	0	0	0	0	0	0	0	0	0	0
Tmod3	0	0	0	0	0	0	0	0	1.33499	0	0	0	0	0	0	0	0	0	0	0	0	0	0	0	0	0
Tmprss4	0	0	0	0	0	0	0	0	0	0	0	0	0	4.47313	0	0	0	0	0	0	0	0	0	0	0	0
Tmsb10	0	0	4.88896	4.00793	0	1.37591	4.14026	3.8061	3.88372	3.40216	3.67784	3.12255	3.61289	2.97649	0	2.68283	4.85139	2.92179	1.95964	2.33952	0	1.98882	0	0	0	0
Tmsb4x	0	0	4.54346	3.50372	2.34639	2.18621	4.3349	3.39439	3.94207	3.35708	3.62024	2.35862	0	1.24861	3.19889	1.76344	4.56851	2.90757	2.12185	1.77585	0	1.95763	0	0	0	2.91247
Tnfaip1	0	0	1.08509	0	0	0	0	0	0	0	0	0	0	0	0	0	0	0	0	0	0	0	0	0	0	0
Tnfaip2	0	0	0	0	0	0	0	0	0	0	0	0	0	0	0	0	0	0	0	0	0	4.08631	0	0	0	0
Tnfaip3	0	0	0	0	0	0	0	0	0	0	0	0	0	0	0	0	0	0	0	3.55534	0	0	0	0	0	0
Tnfaip8l3	0	0	2.97061	4.07954	0	0	0	0	0	0	0	0	0	0	0	0	0	0	0	0	0	0	0	0	0	0
Tnfrsf12a	0	0	3.7546	2.37346	0	0	2.69859	1.90756	0	0	3.78003	3.36755	0	2.89212	0	0	0	0	0	1.88463	0	0	0	0	0	0
Tnfrsf19	0	0	0	0	0	0	0	0	0	0	0	0	0	7.08604	0	0	0	0	0	0	0	0	0	0	0	0
Tnfrsf1a	0	0	1.6291	1.65751	0	0	0	0	0	0	0	0	0	2.04664	0	0	0	0	0	0	0	0	0	0	0	0
Tnfrsf21	0	0	0	0	0	0	1.11929	0	1.99801	0	0	0	0	0	0	0	0	0	0	0	0	0	0	0	0	0
Tnfsf10	0	0	3.25713	2.92587	0	3.24432	2.07736	2.26328	4.06107	3.47284	4.06662	4.58525	2.7618	2.08785	5.02999	5.58903	7.11187	5.89593	0	0	0	0	0	0	0	3.20234
Tnip2	0	0	1.00025	0	0	0	0	0	0	0	0	0	0	0	0	0	0	0	0	0	0	0	0	0	0	0
Tns3	0	0	1.04593	0	0	0	0	0	0	0	0	0	0	0	0	0	0	0	0	0	0	0	0	0	0	0
Tomm5	0	0	0	0	0	0	0	0	0	0	0	0	0	1.31623	0	0	0	0	0	0	0	0	0	0	0	0
Top2a	0	0	0	0	0	0	0	0	0	0	0	0	0	0	0	0	0	0	0	3.32634	0	3.50654	0	0	0	0
Topbp1	0	0	0	1.07581	0	0	0	0	0	0	0	0	0	0	0	0	0	0	0	0	0	0	0	0	0	0
Tor3a	0	0	2.56205	2.49129	0	0	0	1.28187	0	0	0	1.83929	0	1.46918	0	0	0	0	0	0	0	0	0	0	0	0
Tpi1	0	0	0	0	0	0	0	0	0	0	0	0	0	1.38435	0	0	0	0	0	0	0	0	0	0	0	0
Tpm1	0	0	0	0	0	0	0	0	1.67802	0	0	0	0	0	0	0	0	0	0	0	0	0	0	0	0	0
Tpm3	0	0	0	0	0	0	0	0	0	0	0	0	0	0	0	0	0	0	0	1.03687	0	0	0	0	0	0
Tpm3-rs7	0	0	0	0	0	0	0	0	0	0	0	0	0	0	0	0	0	0	0	1.02885	0	0	0	0	0	0
Tpm4	0	0	2.50017	2.04478	0	0	1.37659	1.56593	0	0	1.487	0	0	1.65997	0	0	0	0	0	1.64576	0	0	0	0	0	0
Tprn	0	0	0	0	0	0	0	1.3005	0	0	0	0	0	0	0	0	0	0	0	0	0	0	0	0	0	0
Tpst1	0	0	4.52351	0	0	0	0	0	0	0	0	0	0	0	0	0	0	0	0	0	0	0	0	0	0	0
Tpt1	0	1.29995	1.24644	1.15109	0	0	0	1.0586	1.11595	1.27581	1.45749	1.35464	0	1.11382	0	1.09352	1.43231	1.47658	0	0	0	1.36471	0	0	0	1.52438
Traf3ip2	0	0	1.35372	1.12838	0	0	0	0	0	0	0	0	0	0	0	0	0	0	0	0	0	0	0	0	0	0
Trafd1	0	0	3.19734	2.63385	0	0	2.42788	0	0	0	0	0	0	0	0	0	3.70783	0	0	1.50995	0	0	0	0	0	0
Tram1	0	0	0	0	0	0	0	0	0	0	0	0	0	0	0	0	0	0	0	0	0	1.71179	0	0	0	0
Trbc2	0	0	0	0	0	0	0	0	0	0	0	0	0	0	0	0	0	0	0	6.59126	0	0	0	0	0	0
Trib1	0	0	2.41016	0	0	0	0	0	0	0	0	0	0	0	0	0	0	0	0	0	0	0	0	0	0	0
Trim12a	0	0	3.9207	0	0	0	2.13841	0	2.58796	0	2.44558	0	2.88429	0	0	0	2.48384	0	0	0	0	0	0	0	0	0
Trim12c	0	0	2.65006	2.26542	0	1.58648	2.20972	1.63957	1.89842	0	2.29699	0	0	0	0	0	0	0	0	0	0	0	0	0	0	0
Trim14	0	0	0	0	0	0	0	0	0	0	0	0	0	1.96141	0	0	0	0	0	0	0	0	0	0	0	0
Trim25	0	0	0	0	0	0	0	1.39638	0	0	0	0	0	0	0	0	0	0	0	0	0	0	0	0	0	0
Trim26	0	0	1.23526	1.05138	0	0	0	0	0	0	0	0	0	0	0	0	0	0	0	0	0	0	0	0	0	0
Trim27	0	0	0	0	0	0	0	0	0	0	0	0	0	1.54825	0	0	0	0	0	0	0	0	0	0	0	0
Trim30a	0	0	2.54701	0	0	0	2.8504	0	4.01621	0	4.01932	0	0	1.22305	0	0	3.17966	0	0	0	0	0	0	0	0	0
Trim30d	0	0	4.174	0	0	0	0	0	0	0	0	0	0	0	0	0	0	0	0	0	0	0	0	0	0	0
Trim34a	0	0	2.88301	0	0	0	1.76058	0	1.47763	0	0	0	0	0	0	0	0	0	0	0	0	0	0	0	0	0
Trim47	0	0	2.41477	1.14089	0	0	1.42913	0	0	0	0	0	0	0	0	0	0	0	0	0	0	0	0	0	0	0
Trim5	0	0	0	0	0	0	3.17387	0	3.46572	0	2.93343	0	0	0	0	0	0	0	0	0	0	0	0	0	0	0
Trim56	0	0	1.31084	1.13232	0	0	0	0	0	0	0	0	0	0	0	0	0	0	0	0	0	0	0	0	0	0
Trim6	0	0	0	2.45965	0	0	0	0	0	0	0	0	0	0	0	0	0	0	0	0	0	0	0	0	0	0
Trim7	0	0	0	0	0	0	0	0	0	0	2.62021	0	0	0	0	0	0	0	0	0	0	0	0	0	0	0
Triobp	0	0	1.57668	1.46607	0	0	0	0	0	0	0	0	0	1.41468	0	0	0	0	0	0	0	0	0	0	0	0
Trmt112	0	0	1.18988	0	0	0	0	0	0	0	0	0	0	0	0	0	0	0	0	0	0	0	0	0	0	0
Trp53i11	0	0	0	0	0	0	0	0	0	0	0	0	0	0	0	0	0	0	0	1.84143	0	0	0	0	0	0
Trp53inp1	0	0	1.47785	0	0	0	0	0	0	0	0	0	0	0	0	0	0	0	0	0	0	0	0	0	0	0
Trp63	0	0	0	1.62362	0	0	0	0	0	0	0	0	0	0	0	0	0	0	0	0	0	0	0	0	0	0
Trpm3	0	0	2.63527	2.31563	0	0	1.2153	0	1.39761	0	1.35349	0	0	0	0	0	0	0	0	0	0	0	0	0	0	0
Trpm6	0	0	0	0	0	0	1.56456	0	0	0	0	0	0	0	0	0	0	0	0	0	0	0	0	0	0	0
Tsc22d1	0	0	1.68789	1.15102	0	1.13296	1.97336	1.22181	0	0	0	0	1.38634	0	0	0	0	0	0	0	0	0	0	0	0	0
Tshr	0	0	5.53719	0	0	0	0	0	0	0	0	0	0	0	0	0	0	0	0	0	0	0	0	0	0	0
Tspan14	0	0	0	0	0	0	1.59244	0	1.48105	0	0	0	0	0	0	0	0	0	0	0	0	0	0	0	0	0
Tspan15	0	0	0	0	0	0	0	0	0	0	0	0	1.23439	0	0	0	0	0	0	0	0	0	0	0	0	0
Tspo	0	0	2.05215	1.68053	0	0	1.36485	1.30556	1.51417	1.42353	1.95335	1.22156	1.19915	1.49886	0	1.02111	0	0	2.1246	1.79198	0	2.72847	0	0	0	0
Ttc39b	0	0	2.87512	2.38508	0	0	0	0	0	0	0	0	0	0	0	0	0	0	0	1.4941	0	0	0	0	0	0
Ttpa	0	0	1.31554	0	0	0	0	0	0	0	0	0	0	0	0	0	0	0	0	0	0	0	0	0	0	0
Tuba1b	0	0	1.92813	1.56919	0	0	0	1.53277	0	0	0	1.27444	0	2.00294	0	0	0	0	0	0	0	0	0	0	0	0
Tuba1c	0	0	0	0	0	0	0	0	0	0	0	0	0	1.76167	0	0	0	0	0	0	0	0	0	0	0	0
Tuba4a	0	0	0	0	0	0	0	0	0	0	0	0	0	1.72563	0	0	0	0	0	0	0	0	0	0	0	0
Tubb2a	0	0	2.7727	1.37942	0	0	1.52107	1.14949	0	0	0	0	0	1.02559	0	0	0	0	0	0	0	0	0	0	0	0
Tubb2b	0	0	0	0	0	0	1.97852	1.79301	0	0	0	0	0	1.38445	0	0	0	0	0	0	0	0	0	0	0	0
Tubb4b	0	0	0	0	0	0	1.04403	0	0	0	0	0	0	1.60782	0	0	0	0	0	0	0	0	0	0	0	0
Tubb5	0	0	2.6265	2.33064	0	0	2.18028	2.19487	2.92285	2.69147	3.77247	1.65995	0	2.92753	0	0	0	0	0	1.50424	0	2.06854	0	0	0	0
Tuft1	0	0	0	1.75952	0	0	0	0	0	0	0	0	0	0	0	0	0	0	0	0	0	0	0	0	0	0
Twsg1	0	0	2.04609	1.51121	0	0	0	0	0	0	1.76927	0	0	0	0	0	0	0	0	0	0	0	0	0	0	0
Txn1	0	0	1.05468	1.38626	0	0	0	1.38572	0	1.31124	1.30886	1.79932	0	1.74433	0	1.85493	0	1.91774	0	0	0	1.41384	0	0	0	0
Txndc17	0	0	0	0	0	0	0	0	0	0	1.1527	0	0	1.14259	0	0	0	0	0	0	0	0	0	0	0	0
Txndc5	0	0	0	0	0	0	0	0	0	0	0	0	0	0	0	0	0	0	0	0	0	1.4327	0	0	0	0
Txnip	0	0	0	0	0	0	0	0	1.04088	0	1.166	0	0	0	0	0	0	0	0	0	0	0	0	0	0	0
Tyrobp	0	0	5.59168	5.33316	0	0	5.92364	4.69565	6.25726	6.58808	2.84085	0	0	4.74007	0	0	0	0	0	5.638	0	3.24772	0	0	0	0
Uap1	0	0	0	0	0	0	1.05996	0	0	0	0	0	0	0	0	0	0	0	0	0	0	0	0	0	0	0
Ubash3b	0	0	0	1.22988	0	0	0	0	0	0	0	0	0	0	0	0	0	0	0	0	0	0	0	0	0	0
Ubb	1.40567	0	1.69032	1.12146	0	0	1.16548	0	1.11389	0	2.0296	0	0	0	0	0	1.50174	0	0	0	0	0	0	0	0	0
Ubc	0	0	0	0	0	0	0	1.03115	0	0	0	0	0	1.5097	0	0	0	0	0	0	0	0	0	0	0	0
Ubd	6.54018	6.91055	9.52356	9.83865	0	8.94921	10.6772	9.53515	9.03929	8.09964	8.70746	7.81048	7.03037	10.0142	7.09988	8.68768	7.77179	8.25436	7.85962	10.7387	6.32228	9.11141	0	0	0	7.09656
Ube2l6	0	0	5.55625	5.0269	0	0	0	0	0	0	5.38988	4.20998	3.71856	3.50749	0	0	0	0	0	1.61884	0	0	0	0	0	0
Uchl3	0	0	0	0	0	0	1.02381	0	0	0	0	0	0	0	0	0	0	0	0	0	0	0	0	0	0	0
Ucp2	0	0	1.93635	1.54645	0	0	1.80169	1.65972	0	0	0	0	0	0	0	0	0	0	0	0	0	1.74908	0	0	0	0
Ufm1	0	0	0	0	0	0	0	0	0	0	0	0	0	1.26274	0	0	0	0	0	0	0	0	0	0	0	0
Ugt2b37	0	0	3.1273	2.10724	0	0	0	0	0	0	0	0	0	0	0	0	0	0	0	0	0	0	0	0	0	0
Uhrf1bp1l	0	0	0	0	0	0	0	0	0	0	0	0	0	0	0	0	0	0	0	0	0	1.18241	0	0	0	0
Ulbp1	0	0	0	0	0	0	0	0	0	0	0	0	0	0	0	0	0	0	0	2.24281	0	0	0	0	0	0
Ulk4	0	0	0	1.07557	0	0	0	0	0	0	0	0	0	0	0	0	0	0	0	0	0	0	0	0	0	0
Umod	0	0	0	1.1585	0	0	0	0	0	0	0	1.46897	0	2.14425	0	0	0	0	0	0	0	0	0	0	0	0
Unc13b	0	0	2.03004	0	0	0	0	0	0	0	0	0	0	0	0	0	0	0	0	0	0	0	0	0	0	0
Unc5b	0	0	0	0	0	0	0	0	0	0	0	0	0	0	0	0	0	0	0	0	0	2.97166	0	0	0	0
Unc93b1	0	0	3.69934	2.7167	0	0	1.87416	1.65762	1.97996	1.76433	1.67063	1.07779	0	1.83723	0	2.00963	0	0	0	1.21212	0	0	0	0	0	0
Upp1	0	0	5.43603	4.36621	0	0	3.26682	2.41474	2.92487	2.01468	3.1111	3.01709	0	4.45252	0	0	0	0	0	1.69681	0	0	0	0	0	0
Uqcc2	0	0	0	0	0	0	0	0	0	0	0	1.6476	0	0	0	0	0	0	0	0	0	0	0	0	0	0
Uqcc3	0	0	0	0	0	0	0	0	0	0	0	0	0	1.57935	0	0	0	0	0	0	0	0	0	0	0	0
Uqcr10	0	0	0	0	0	0	0	0	0	0	0	0	0	1.03067	0	0	0	0	0	0	0	0	0	0	0	0
Usp18	0	0	5.86492	4.33964	0	0	2.33633	0	0	0	0	0	0	0	0	0	0	0	0	0	0	0	0	0	0	0
Usp25	0	0	0	1.04116	0	0	0	0	0	0	0	0	0	0	0	0	0	0	0	0	0	0	0	0	0	0
Usp31	0	0	1.09787	0	0	0	0	0	0	0	0	0	0	0	0	0	0	0	0	0	0	0	0	0	0	0
Usp43	0	0	1.67124	0	0	0	0	0	0	0	0	0	0	0	0	0	0	0	0	0	0	0	0	0	0	0
Utp3	0	0	1.2794	0	0	0	0	0	0	0	0	0	0	0	0	0	0	0	0	0	0	0	0	0	0	0
Utrn	0	0	1.93305	1.05327	0	0	0	0	0	0	0	0	0	0	0	0	0	0	0	0	0	0	0	0	0	0
Vac14	0	0	1.06035	0	0	0	0	0	0	0	0	0	0	0	0	0	0	0	0	0	0	0	0	0	0	0
Vamp5	0	0	1.10527	1.08667	0	0	0	0	0	0	0	0	0	0	0	0	0	0	0	0	0	0	0	0	0	0
Vamp8	0	0	0	0	0	0	0	0	0	0	0	0	0	0	0	0	0	0	0	1.08898	0	0	0	0	0	0
Vars	0	0	1.47253	0	0	0	0	0	1.98606	0	2.27365	2.08151	0	1.24845	0	0	0	0	0	0	0	0	0	0	0	0
Vasp	0	0	1.451	1.21804	0	0	1.25622	0	0	0	0	0	0	0	0	0	0	0	0	0	0	0	0	0	0	0
Vav3	0	0	0	0	0	0	0	0	1.07674	0	0	0	0	0	0	0	0	0	0	0	0	0	0	0	0	0
Vcam1	0	0	7.27744	4.29487	0	4.88043	6.98352	5.58635	5.53559	5.97881	6.16871	5.47261	0	4.75903	0	3.6292	5.88641	3.9282	4.27773	4.09055	0	2.11116	0	0	0	4.67016
Vim	0	0	5.38683	4.17139	0	0	4.42154	4.22619	6.65676	3.60099	4.73752	5.36749	0	4.94775	0	0	0	0	3.74804	2.00677	4.41043	3.31501	0	0	0	0
Vmp1	0	0	1.66765	0	0	0	1.62303	0	1.42658	0	1.73451	0	0	0	0	1.0153	1.49875	0	0	1.13297	1.5867	1.91762	0	0	0	0
Vps13c	0	0	1.49897	0	0	0	0	0	0	0	0	0	0	0	0	0	0	0	0	0	0	0	0	0	0	0
Vps37d	0	0	2.04856	0	0	0	0	0	0	0	0	0	0	0	0	0	0	0	0	0	0	0	0	0	0	0
Vps54	0	0	1.02313	0	0	0	0	0	0	0	0	0	0	0	0	0	1.57766	0	0	0	0	0	0	0	0	0
Vwa1	0	0	0	0	0	0	0	0	0	0	0	0	0	0	0	0	0	0	0	2.0253	0	0	0	0	0	0
Vwa5a	0	0	1.96945	1.30052	0	0	1.79101	1.3489	1.38563	0	1.81888	0	0	1.46376	0	0	0	2.43345	0	0	0	0	0	0	0	0
Wars	0	0	1.91561	1.43872	0	0	1.83859	0	0	0	2.97595	0	0	1.86759	0	0	0	0	3.08745	3.75646	0	2.59064	0	0	0	0
Wdr89	0	0	1.012	1.24207	0	0	0	1.03465	0	1.21878	1.27818	1.40622	0	1.24407	0	1.1045	0	1.71573	0	0	0	1.26759	0	0	0	1.91539
Wdtc1	0	0	0	1.13793	0	0	0	0	0	0	0	0	0	0	0	0	0	0	0	0	0	0	0	0	0	0
Wfdc2	0	0	1.93736	1.29022	0	0	0	0	1.64802	1.63868	1.60951	1.12439	1.76433	1.40891	0	1.05985	0	0	0	1.01423	0	1.1378	0	0	0	0
Wipf1	0	0	2.26164	1.35044	0	0	0	0	0	0	3.09385	0	0	0	0	0	0	0	0	0	0	0	0	0	0	0
Wsb1	0	0	0	0	0	0	1.21975	0	1.1052	0	0	0	0	0	0	0	0	0	0	0	0	0	0	0	0	0
Wtip	0	0	1.22547	0	0	0	0	0	0	0	0	0	0	0	0	0	0	0	0	0	0	0	0	0	0	0
Wwc1	0	0	0	0	0	0	0	0	0	0	1.05231	0	0	0	0	0	0	0	0	0	0	0	0	0	0	0
Xaf1	0	5.06114	5.36482	4.56981	0	3.75784	3.33671	4.11262	4.26956	4.18629	5.7627	3.87779	0	3.12147	0	4.44447	5.91856	5.55104	0	0	0	0	0	0	0	0
Xdh	0	0	3.13649	4.27827	0	0	5.13177	0	3.80825	3.86637	3.06046	4.24473	0	4.28608	0	0	0	0	3.04715	1.39578	0	0	0	0	0	0
Xlr5a	0	0	1.47278	0	0	0	0	0	0	0	0	0	0	0	0	0	0	0	0	0	0	0	0	0	0	0
Ypel2	0	0	3.09475	2.07422	0	0	0	0	0	0	1.62686	0	0	0	0	0	0	0	0	0	0	0	0	0	0	0
Ywhag	0	0	1.33393	0	0	0	0	0	0	1.21644	1.53068	0	0	1.21888	0	0	0	0	0	0	0	0	0	0	0	0
Ywhah	0	0	2.19711	1.63474	0	0	1.38341	1.0315	0	0	2.25958	0	0	1.22469	0	0	0	0	0	1.08611	0	0	0	0	0	0
Ywhaz	0	0	0	0	0	0	0	0	0	0	1.07992	0	0	0	0	0	0	0	0	0	0	0	0	0	0	0
Zbed3	0	0	1.77049	1.74599	0	0	0	0	0	0	0	0	0	0	0	0	0	0	0	0	0	0	0	0	0	0
Zbp1	0	0	8.87754	8.17714	0	5.50129	7.65515	6.7752	6.69083	6.51351	6.55362	6.11819	5.88958	5.82071	0	6.2049	6.25958	0	0	2.90131	0	4.02068	0	0	0	0
Zbtb16	0	0	6.86768	0	0	0	2.26029	0	3.85435	0	2.8028	0	0	0	0	0	0	0	0	0	0	0	0	0	0	0
Zbtb18	0	0	1.30677	0	0	0	0	0	0	0	0	0	0	0	0	0	0	0	0	0	0	0	0	0	0	0
Zbtb4	0	0	1.10231	0	0	0	0	0	0	0	0	0	0	0	0	0	0	0	0	0	0	0	0	0	0	0
Zbtb7c	0	0	0	0	0	0	0	0	0	0	0	0	0	0	0	0	0	0	0	0	0	1.1273	0	0	0	0
Zc2hc1a	0	0	1.62402	0	0	0	0	0	0	0	0	0	0	0	0	0	0	0	0	0	0	0	0	0	0	0
Zc3h12b	0	0	1.1219	1.27427	0	0	0	0	0	0	0	0	0	0	0	0	0	0	0	0	0	0	0	0	0	0
Zc3h7a	0	0	1.04008	0	0	0	0	0	0	0	0	0	0	0	0	0	0	0	0	0	0	0	0	0	0	0
Zc3hav1	0	0	2.50354	2.13722	0	0	1.88844	1.95494	1.66727	0	0	2.04676	0	1.98329	0	0	0	2.08607	0	0	0	0	0	0	0	0
Zcchc6	0	0	1.23876	0	0	0	0	0	0	0	0	0	0	0	0	0	0	0	0	0	0	0	0	0	0	0
Zdhhc2	0	0	1.21246	0	0	0	0	0	0	0	0	0	0	0	0	0	0	0	0	0	0	0	0	0	0	0
Zdhhc6	0	0	0	0	0	0	0	0	1.16687	0	0	0	0	0	0	0	0	0	0	0	0	0	0	0	0	0
Zeb2	0	0	0	0	0	0	0	0	0	0	0	0	0	2.14937	0	0	0	0	0	0	0	0	0	0	0	0
Zfhx3	0	0	0	0	0	0	0	0	1.16453	0	0	0	0	0	0	0	0	0	0	0	0	0	0	0	0	0
Zfp185	0	0	1.04354	0	0	0	0	0	0	0	0	0	0	1.72621	0	0	0	0	0	0	0	0	0	0	0	0
Zfp239	0	0	0	1.38699	0	0	0	0	0	0	0	0	0	0	0	0	0	0	0	0	0	0	0	0	0	0
Zfp36	0	0	0	0	0	0	1.38291	0	0	0	0	0	0	0	0	0	0	0	0	0	0	0	0	0	0	0
Zfp36l1	0	0	1.68811	0	0	0	1.30436	0	1.69876	0	2.6958	0	0	0	0	0	0	0	0	0	0	0	0	0	0	0
Zfp608	0	0	0	0	0	0	0	0	0	0	1.32281	0	0	0	0	0	0	0	0	0	0	0	0	0	0	0
Zfp697	0	0	1.05284	0	0	0	1.66552	0	0	0	0	0	0	0	0	0	0	0	0	0	0	0	0	0	0	0
Zfp706	0	0	0	0	0	0	0	0	0	0	0	0	0	1.03449	0	0	0	0	0	0	0	0	0	0	0	0
Zfp810	0	0	1.00511	0	0	0	0	0	0	0	0	0	0	0	0	0	0	0	0	0	0	0	0	0	0	0
Zfp950	0	0	1.09078	0	0	0	0	0	0	0	0	0	0	0	0	0	0	0	0	0	0	0	0	0	0	0
Zfp981	0	0	4.93529	3.21501	4.08574	0	6.01089	0	3.14839	0	2.31417	0	0	0	1.65409	0	2.76056	0	0	0	0	0	0	0	0	0
Zfp984	0	0	1.23064	0	0	0	0	0	0	0	0	0	0	0	0	0	0	0	0	0	0	0	0	0	0	0
Zgrf1	0	0	0	2.28948	0	0	0	0	0	0	0	0	0	0	0	0	0	0	0	0	0	0	0	0	0	0
Zmat3	0	0	1.15053	1.10821	0	0	0	0	0	0	0	0	0	0	0	0	0	0	0	0	0	0	0	0	0	0
Zmynd15	0	0	1.71684	0	0	0	0	0	0	0	0	0	0	0	0	0	0	0	0	0	0	0	0	0	0	0
Znfx1	0	0	1.00118	0	0	0	0	0	0	0	0	0	0	1.37815	0	0	0	0	0	0	0	0	0	0	0	0
Znrf1	0	0	0	0	0	0	0	0	1.12885	0	1.5905	0	0	0	0	0	0	0	0	0	0	0	0	0	0	0
Zpld1	0	0	1.42109	1.26201	0	0	0	0	0	0	0	0	0	0	0	0	0	0	0	0	0	0	0	0	0	0
Zscan21	0	0	0	1.32757	0	0	0	1.04876	0	0	0	0	0	0	0	0	0	0	0	0	0	0	0	0	0	0
Zwint	0	0	1.03713	0	0	0	1.00891	0	0	0	0	0	0	0	0	0	0	0	0	0	0	0	0	0	0	0
Zyx	0	0	1.47082	0	0	0	1.98134	0	0	0	0	0	0	0	0	0	0	0	0	1.43716	0	0	0	0	0	0

## Sheet: Figure S6B right
Figure S6B	Gene Expression matrix per celltype and strain for each DGE gene of any celltype (downregulated), values only appear if log2FC < -1
Gene	Down_Podo_Blck6	Down_Podo_Balbc	Down_PT_Blck6	Down_PT_Balbc	Down_tL_Blck6	Down_tL_Balbc	Down_TAL_Blck6	Down_TAL_Balbc	Down_DCT_Blck6	Down_DCT_Balbc	Down_CNT_Blck6	Down_CNT_Balbc	Down_CD-PC_Blck6	Down_CD-PC_Balbc	Down_CD-IC-A_Blck6	Down_CD-IC-A_Balbc	Down_CD-IC-B_Blck6	Down_CD-IC-B_Balbc	Down_EC_Blck6	Down_EC_Balbc	Down_IntC_Blck6	Down_IntC_Balbc	Down_Uro_Blck6	Down_Uro_Balbc
0610005C13Rik	-3.98597	0	-2.06349	-1.14733	-2.82411	0	-2.57988	-1.13294	-2.07095	0	-3.03379	0	0	0	0	0	0	0	-3.36119	0	0	0	0	0
0610006L08Rik	0	0	-1.33586	0	0	0	0	0	0	0	0	0	0	0	0	0	0	0	0	0	0	0	0	0
1010001N08Rik	0	0	0	0	0	0	0	0	0	0	0	0	0	0	0	0	0	0	0	0	0	-2.57451	0	0
1110019B22Rik	0	0	0	0	0	0	-3.07278	-2.11173	0	0	-3.08297	0	0	0	0	0	0	0	0	0	0	0	0	0
1110019D14Rik	0	0	-1.23118	0	0	0	0	0	0	0	0	0	0	0	0	0	0	0	0	0	0	0	0	0
1600010M07Rik	0	0	0	0	0	0	0	0	0	0	0	0	0	-1.33211	0	0	0	0	0	0	0	0	0	0
1700028J19Rik	0	0	0	0	0	0	-1.47557	0	-1.82941	0	0	0	0	0	0	0	0	0	0	0	0	0	0	0
1700034I23Rik	0	0	0	0	0	0	0	0	0	0	0	0	0	0	0	0	0	0	0	0	0	0	0	0
1700039E22Rik	0	0	0	0	0	0	0	0	0	0	0	0	0	-4.56703	0	0	0	0	0	0	0	0	0	0
1700085D07Rik	0	0	0	0	0	0	0	-1.45852	0	0	0	0	0	-3.04987	0	0	0	0	0	-1.71566	0	0	0	0
1700110K17Rik	0	0	0	-1.11161	0	0	0	0	0	0	0	0	0	-3.24158	0	0	0	0	0	0	0	0	0	0
1700126G02Rik	0	0	0	0	0	0	0	-1.07738	0	0	0	0	0	-1.86824	0	0	0	0	0	0	0	0	0	0
1810062O18Rik	0	0	0	0	0	0	0	-1.2522	0	0	0	0	0	0	0	0	0	0	0	0	0	0	0	0
2310043O21Rik	0	0	0	0	0	0	0	0	0	0	0	0	0	0	0	0	0	0	0	0	0	0	0	0
2410015M20Rik	0	0	0	0	0	0	-1.0222	0	0	0	0	0	0	0	0	0	0	0	0	0	0	0	0	0
2410131K14Rik	0	0	0	0	0	0	0	0	0	0	0	0	0	0	0	0	0	0	0	0	0	0	0	0
2610020C07Rik	0	0	0	0	0	0	0	0	0	0	0	0	0	-1.23841	0	0	0	0	0	0	0	0	0	0
2610035D17Rik	0	0	0	0	0	0	-1.07125	0	-1.27682	0	0	0	-1.50503	0	0	0	0	0	0	0	0	0	0	0
2700049A03Rik	0	0	0	0	0	0	0	0	0	0	0	0	-1.75901	0	0	0	0	0	0	0	0	0	0	0
2700089I24Rik	0	0	0	0	-4.75576	0	0	0	0	0	0	0	-2.4332	0	0	0	0	0	0	0	0	0	0	0
3110021N24Rik	0	0	0	0	0	0	0	0	0	0	0	0	0	-1.7656	0	0	0	0	0	0	0	0	0	0
3110099E03Rik	0	0	0	0	0	0	0	0	0	0	0	0	0	0	0	0	0	0	0	-2.41697	0	0	0	0
3200001D21Rik	0	0	0	0	0	0	0	-1.41347	0	0	0	0	0	0	0	0	0	0	0	0	0	0	0	0
3632451O06Rik	0	0	-1.21962	0	0	0	0	0	0	0	0	0	0	0	0	0	0	0	0	0	0	0	0	0
4732440D04Rik	0	0	0	0	0	0	0	0	0	0	0	0	0	-1.33111	0	0	0	0	0	0	0	0	0	0
4732463B04Rik	0	0	-2.05852	-1.09201	0	0	0	0	0	0	0	0	0	0	0	0	-1.80541	0	0	0	0	0	0	0
4732465J04Rik	0	0	0	0	0	0	-1.34426	-1.14461	0	0	0	0	0	0	0	0	0	0	0	0	0	0	0	0
4732491K20Rik	0	0	0	0	0	0	-1.14969	0	0	0	0	0	0	0	0	0	0	0	0	0	0	0	0	0
4833439L19Rik	0	0	-1.12741	0	0	0	0	0	0	0	0	0	0	0	0	0	0	0	0	0	0	0	0	0
4921507P07Rik	0	0	0	0	0	0	0	-1.03671	0	0	0	0	0	0	0	0	0	0	0	0	0	0	0	0
4921539H07Rik	0	0	-1.02897	0	0	0	0	0	0	0	0	0	0	0	0	0	0	0	0	0	0	0	0	0
4930426D05Rik	0	0	0	0	0	0	0	0	0	0	0	0	0	-1.91915	0	0	0	0	0	0	0	0	0	0
4930480K23Rik	0	0	0	0	0	0	-1.23046	0	0	0	0	0	0	0	0	0	0	0	0	0	0	0	0	0
4930481A15Rik	0	0	-1.36369	0	0	0	-1.59815	0	-1.54359	0	-1.82164	0	0	0	0	0	0	0	0	0	0	0	0	0
4930486I03Rik	0	0	0	0	0	0	0	0	0	0	0	0	0	-1.50017	0	0	0	0	0	0	0	0	0	0
4930517O19Rik	0	0	0	-1.16636	0	0	0	-1.01267	0	0	0	0	0	0	0	0	0	0	0	0	0	0	0	0
4930533B01Rik	0	0	0	0	0	0	0	-1.35668	0	0	0	0	0	0	0	0	0	0	0	0	0	0	0	0
4930533I22Rik	0	0	-4.9355	-2.54634	0	0	0	0	0	0	0	0	0	0	0	0	0	0	0	0	0	0	0	0
4930533K18Rik	0	0	0	0	0	0	0	0	0	0	0	0	0	-1.10619	0	0	0	0	0	0	0	0	0	0
4930545L23Rik	0	0	0	-1.01261	0	0	0	0	0	0	0	0	0	0	0	0	0	0	0	0	0	0	0	0
4930548K13Rik	0	0	0	0	0	0	0	0	0	0	0	0	0	0	0	0	0	0	0	0	0	0	0	0
4930549C15Rik	0	0	0	0	0	0	0	0	0	0	0	0	0	0	0	0	0	0	0	-2.29176	0	0	0	0
4930556J24Rik	0	0	0	0	0	0	-1.1921	0	-1.34384	0	-1.26173	0	0	0	0	0	0	0	0	0	0	0	0	0
4930557K07Rik	0	0	0	0	0	-1.15954	0	0	0	0	0	0	0	-1.61207	0	0	0	0	0	0	0	0	0	0
4930578G10Rik	0	0	0	0	0	0	0	0	0	0	0	0	0	0	0	0	0	0	0	0	0	-2.01498	0	0
4930579G18Rik	0	0	0	0	-3.2061	0	0	0	0	0	0	0	0	0	0	0	0	0	0	0	0	0	0	0
4930595D18Rik	0	0	0	0	0	0	0	0	0	0	0	0	0	-2.43276	0	0	0	0	0	0	0	0	0	0
4931406C07Rik	0	0	-1.34455	0	0	0	-1.30822	0	-1.3255	0	0	0	0	0	0	0	0	0	-2.17055	0	-2.57783	0	0	0
4932422M17Rik	0	0	0	0	0	0	0	0	0	0	0	0	0	-2.30756	0	0	0	0	0	0	0	0	0	0
4932438A13Rik	0	0	0	0	0	0	0	0	0	0	0	0	-1.14898	0	0	0	0	0	0	0	0	0	0	0
4932443L11Rik	0	0	0	0	0	0	0	0	0	0	0	0	0	-3.1036	0	0	0	0	0	0	0	0	0	0
4933406C10Rik	0	0	0	-1.05135	0	0	0	0	0	0	0	0	0	0	0	0	0	0	0	0	0	0	0	0
4933417A18Rik	0	0	0	-2.38963	0	0	0	0	0	0	0	0	0	0	0	0	0	0	0	0	0	0	0	0
4933417O13Rik	0	0	0	0	0	0	0	0	0	0	0	0	0	-1.65506	0	-1.69456	0	0	0	0	0	0	0	0
4933423P22Rik	0	0	0	0	0	0	0	0	0	0	0	0	0	-1.76823	0	0	0	0	0	0	0	0	0	0
5031425E22Rik	0	0	0	0	0	0	0	0	0	0	0	0	0	0	0	0	0	0	0	0	0	-1.16009	0	0
5330417C22Rik	0	0	0	0	0	0	0	0	0	-1.86111	0	0	0	0	0	0	0	0	0	0	0	0	0	0
5430402O13Rik	0	0	0	0	0	0	-1.04521	0	0	0	0	0	0	0	0	0	0	0	0	0	0	0	0	0
5830473C10Rik	0	0	0	0	0	0	0	0	-3.48433	0	-3.18694	0	0	0	0	0	0	0	0	0	0	0	0	0
6330410L21Rik	0	0	0	0	0	0	-3.61761	-1.90049	0	0	0	0	0	0	0	0	0	0	0	0	0	0	0	0
6430573F11Rik	0	0	0	0	0	0	0	0	-2.21862	0	-1.78074	-1.2559	0	0	-3.45521	0	0	0	0	0	0	0	0	0
6530409C15Rik	0	0	0	0	0	0	0	0	0	0	0	0	0	-1.41724	0	0	0	0	0	0	0	0	0	0
6720427I07Rik	0	0	0	0	0	0	0	0	0	0	0	0	0	-1.31278	0	0	0	0	0	0	0	0	0	0
6820408C15Rik	0	0	0	0	0	0	0	0	0	0	0	0	0	-1.21801	0	0	0	0	0	0	0	0	0	0
9030025P20Rik	0	0	0	0	0	0	0	-1.61038	0	0	0	0	0	-2.01732	0	0	0	0	0	0	0	0	0	0
9130604C24Rik	0	0	0	0	-3.73058	0	0	0	0	0	0	0	0	0	0	0	0	0	0	0	0	0	0	0
9230112J17Rik	0	0	0	0	0	0	0	0	0	0	0	0	0	-2.54637	0	0	0	0	0	0	0	0	0	0
9330020H09Rik	0	0	0	0	0	0	0	0	0	0	0	0	0	-1.89869	0	0	0	0	0	0	0	0	0	0
9430037G07Rik	0	0	0	0	0	0	0	0	-2.35387	0	-3.17671	0	0	0	0	0	0	0	0	0	0	0	0	0
9530026P05Rik	0	0	0	0	0	0	0	0	0	0	0	0	0	-1.23645	0	0	0	0	-2.38757	-1.78589	0	-1.57501	0	0
9630028H03Rik	0	0	0	-1.32486	0	0	0	-1.40275	0	0	0	0	0	0	0	0	0	0	0	0	0	0	0	0
A230057D06Rik	0	0	0	0	0	0	0	0	0	0	0	0	0	0	0	0	0	0	0	0	0	-2.00772	0	0
A330032B11Rik	0	0	0	0	0	0	-1.04344	-1.26232	0	-1.76638	0	0	0	0	0	0	0	0	0	0	0	0	0	0
A430090L17Rik	0	0	0	0	0	-2.00487	0	0	0	0	0	0	0	-2.10335	0	-1.39776	0	0	0	0	0	0	0	0
A630001O12Rik	0	0	0	-1.8477	0	0	0	0	0	0	0	0	0	0	0	0	0	0	0	0	0	0	0	0
A730049H05Rik	0	0	-1.11094	0	0	0	0	0	0	0	0	0	0	0	0	0	0	0	0	0	0	-1.35747	0	0
A930009A15Rik	0	0	0	0	-6.30723	0	0	0	0	0	0	0	0	0	0	0	0	0	0	0	0	0	0	0
A930033H14Rik	0	0	-1.01296	-1.53956	0	0	0	0	0	0	0	0	0	0	0	0	0	0	0	0	0	0	0	0
AA543186	0	0	0	0	0	0	0	0	0	0	0	0	0	0	0	0	0	0	0	0	0	0	0	0
AA986860	0	0	0	0	0	0	-1.00962	0	0	0	0	0	0	0	0	0	0	0	0	0	0	0	0	0
Aacs	0	0	-2.61792	-2.63099	0	0	0	0	0	0	0	0	0	0	0	0	0	0	0	0	0	0	0	0
Aadac	0	0	-1.5808	0	0	0	0	0	0	0	0	0	0	0	0	0	0	0	0	0	0	0	0	0
Aadat	0	0	-1.94391	0	0	0	-2.20066	0	-2.92975	0	-1.42224	0	-1.26856	0	0	0	-2.81057	0	-2.77449	0	-3.21845	0	0	0
Aamdc	0	0	-1.35263	-1.19252	0	0	0	0	0	0	0	0	-1.27254	0	0	0	0	0	0	0	0	0	0	0
Aass	0	0	-1.22387	-1.05055	0	0	-1.56997	0	-1.83717	0	-2.54224	0	0	0	0	0	0	0	0	0	0	0	0	0
Aatk	0	0	0	0	0	0	0	0	0	0	0	0	0	0	0	0	0	0	0	0	-5.37332	0	0	0
Abat	0	0	-1.57074	-1.08172	0	0	-1.17265	0	-2.05249	0	-1.73653	0	-2.48628	0	0	0	0	0	-2.62717	0	0	0	0	0
Abca2	0	0	0	0	0	0	0	-1.04317	0	0	0	0	0	0	0	0	0	0	0	0	0	0	0	0
Abca8a	0	0	0	0	0	0	0	0	0	0	0	0	0	0	0	0	0	0	0	0	-3.35957	-5.12462	0	0
Abca8b	0	0	0	0	0	0	0	0	0	0	0	0	0	0	0	0	0	0	0	0	0	-2.8498	0	0
Abca9	0	0	0	0	0	0	0	0	0	0	0	0	0	0	0	0	0	0	0	0	0	-2.46864	0	0
Abcb1a	0	0	0	-1.33064	0	0	0	0	0	0	0	0	0	0	0	0	0	0	0	0	0	0	0	0
Abcb1b	0	0	0	-1.55386	0	0	0	0	0	0	0	0	0	0	0	0	0	0	0	0	0	0	0	0
Abcc4	0	0	0	0	0	0	0	0	0	0	0	0	-1.25084	0	0	0	0	0	0	0	0	0	0	0
Abcc5	0	0	0	0	0	-1.12941	0	0	0	0	0	0	-1.73685	-1.28842	0	0	0	0	0	0	0	0	0	0
Abcc6	0	0	-1.77871	0	0	0	0	0	0	0	0	0	0	0	0	0	0	0	0	0	0	0	0	0
Abcc9	0	0	-3.32871	0	0	0	0	0	0	0	0	0	0	0	0	0	0	0	0	0	0	-2.33163	0	0
Abcd4	0	0	-1.39846	0	0	0	0	0	0	0	0	0	0	0	0	0	0	0	0	0	0	0	0	0
Abcg2	0	0	0	0	0	0	-1.18384	0	-1.71402	0	0	0	0	0	0	0	0	0	0	0	0	0	0	0
Abhd14a	0	0	-1.23365	0	0	0	0	0	0	0	0	0	-1.93475	0	0	0	0	0	0	0	0	0	0	0
Abhd14b	0	0	-1.37875	0	0	-1.34926	0	0	-1.42001	0	0	0	0	0	0	0	0	0	0	0	0	0	0	0
Abhd15	0	0	0	0	0	0	0	0	0	0	0	0	0	-1.15175	0	0	0	0	0	0	0	0	0	0
Abhd17c	0	0	0	0	0	0	0	0	0	0	-1.1151	0	0	0	0	0	0	0	0	0	0	0	0	0
Abhd18	0	0	-1.33332	-1.04858	0	0	0	0	0	0	-1.07697	0	0	0	0	0	0	0	0	0	0	0	0	0
Abhd3	0	0	-1.35985	0	0	0	-1.30575	0	-1.8396	0	0	0	0	0	0	0	0	0	0	0	0	0	0	0
Abhd6	0	0	0	0	0	0	-1.05125	0	-1.34993	0	0	0	0	0	0	0	0	0	0	0	0	0	0	0
Ablim2	0	0	0	0	0	0	0	0	0	0	0	0	0	0	0	0	0	0	0	0	0	-3.28686	0	0
Abr	0	0	0	0	0	0	0	0	0	0	0	-1.0228	0	0	0	0	0	0	0	0	0	0	0	0
AC102334.1	0	0	0	0	0	0	0	0	0	0	0	0	0	0	0	0	0	0	0	0	0	0	0	0
AC110166.2	0	0	-1.4055	-1.16101	0	0	0	0	0	0	0	0	0	-1.89619	0	0	0	0	0	0	0	0	0	0
AC117197.3	0	0	-1.92384	0	0	0	0	0	0	0	0	0	0	0	0	0	0	0	0	0	0	0	0	0
AC124490.1	0	0	0	0	0	0	0	0	0	0	0	0	0	0	0	0	0	0	0	0	-5.39982	0	0	0
AC135964.1	0	0	0	0	0	0	0	0	0	-1.57805	0	0	0	0	0	0	0	0	0	0	0	0	0	0
AC135964.2	0	0	0	-1.32532	0	0	0	0	0	0	0	0	0	0	0	0	0	0	0	0	0	0	0	0
AC140300.3	0	0	-4.26225	-2.25771	0	0	0	0	0	0	0	0	0	0	0	0	0	0	0	0	0	0	0	0
AC144408.3	0	0	0	0	0	-1.93486	0	0	0	0	0	0	0	-2.41366	0	0	0	0	0	0	0	0	0	0
AC149090.1	0	0	0	0	0	0	0	0	0	0	0	0	0	-1.16113	0	0	0	0	0	0	0	0	0	0
AC153364.1	0	0	0	0	0	0	0	-1.08257	0	0	0	0	0	-1.93472	0	0	0	0	0	0	0	0	0	0
AC154507.3	0	0	0	0	0	0	0	0	0	0	0	0	0	0	0	0	-2.49352	0	0	0	0	0	0	0
AC157554.2	0	0	0	0	0	0	0	0	0	0	0	0	0	-2.03829	0	0	0	0	0	0	0	0	0	0
AC161607.1	0	0	0	0	0	0	0	-1.03892	0	0	0	0	0	-1.6073	0	0	0	0	0	0	0	0	0	0
AC162302.1	0	0	0	0	0	0	0	0	0	0	0	0	0	-1.03162	0	0	0	0	0	0	0	0	0	0
AC163018.1	0	0	0	0	0	0	0	0	0	0	0	0	0	-1.62553	0	0	0	0	0	0	0	0	0	0
AC166995.1	0	0	-2.37636	-1.11783	0	0	0	0	0	0	0	0	0	0	0	0	0	0	0	0	0	0	0	0
Acaa1b	0	0	-3.0108	-2.74434	-5.08261	0	-2.58617	-1.8857	-2.99319	-2.62844	-2.93716	-2.43505	-2.49516	-1.62954	0	0	-2.6987	0	-5.7316	-2.44115	-4.80036	-2.40161	0	0
Acaa2	0	0	-2.34486	-1.61059	0	0	-1.19618	0	-1.38556	0	0	0	0	0	0	0	0	0	0	0	0	0	0	0
Acacb	0	0	0	0	0	0	-1.30094	0	-1.01273	0	-1.67424	0	0	0	0	0	-1.58969	0	0	0	0	0	0	0
Acad11	0	0	-1.06828	-1.06471	0	0	0	0	-1.38229	0	0	0	0	0	0	0	0	0	0	0	0	0	0	0
Acad12	0	0	-1.02311	0	0	0	0	0	0	0	0	0	0	0	0	0	0	0	0	0	0	0	0	0
Acadm	0	0	-1.516	0	0	0	-1.04494	0	-1.17447	0	0	0	-1.09109	0	-1.82982	0	0	0	-2.8389	0	-2.44835	0	0	0
Acadsb	0	0	0	0	0	0	-1.18394	0	0	0	-1.01563	0	0	0	0	0	0	0	0	0	0	0	0	0
Acadvl	0	0	0	0	0	0	-1.20394	0	-1.2459	0	0	0	0	0	0	0	0	0	0	0	0	0	0	0
Acat1	0	0	-1.33573	0	0	0	-1.09136	0	-1.04113	0	-1.11104	0	0	0	0	0	-1.13503	0	0	0	0	0	0	0
Acat2	0	0	-1.00124	0	0	0	0	0	0	0	0	0	0	0	0	0	0	0	0	0	0	0	0	0
Ace	0	0	-1.25061	0	0	0	0	0	0	0	0	0	0	0	0	0	0	0	0	0	0	0	0	0
Ackr4	0	0	0	-1.54932	0	0	0	-1.26861	0	0	0	0	0	0	0	-1.82475	0	0	0	0	0	0	0	0
Acmsd	0	0	-1.46366	-1.14848	0	0	0	0	0	0	0	0	0	0	0	-2.42099	0	0	0	0	0	0	0	0
Acnat1	0	0	-2.07307	-1.29886	0	0	0	0	0	0	0	0	0	0	0	0	0	0	0	0	0	0	0	0
Acnat2	0	0	0	-1.88678	0	0	0	0	0	0	0	0	0	0	0	0	0	0	0	0	0	0	0	0
Aco1	0	0	-1.18825	0	0	0	0	0	0	0	0	0	0	0	0	0	0	0	0	0	0	0	0	0
Aco2	0	0	-1.11787	0	0	0	0	0	0	0	0	0	0	0	0	0	-1.11976	0	-1.34429	0	0	0	0	0
Acot11	0	0	-1.22749	0	0	0	-1.54065	0	-1.2665	0	-1.78779	0	0	0	0	0	-1.26031	0	0	0	0	0	0	0
Acot13	0	0	-1.02015	0	0	0	0	0	-1.32802	0	0	0	0	0	0	0	0	0	0	0	0	0	0	0
Acot3	0	0	-4.97786	-3.36658	0	0	0	0	0	0	0	0	0	0	-3.30321	0	-2.65819	0	0	0	0	0	0	0
Acox2	0	0	-1.80212	0	0	0	0	0	0	0	0	0	0	0	0	0	0	0	0	0	0	0	0	0
Acox3	0	0	-1.10866	-1.16139	0	0	0	0	0	0	0	0	0	0	0	0	0	0	0	0	0	0	0	0
Acp6	0	0	-1.11427	-1.38641	0	0	0	0	0	0	0	0	0	0	0	0	0	0	0	0	0	0	0	0
Acpp	0	0	0	0	0	0	0	0	0	0	0	0	-1.64804	0	0	0	0	0	0	0	0	0	0	0
Acsl1	0	0	-1.26413	0	0	0	0	0	0	0	0	0	0	0	0	0	0	0	0	0	0	0	0	0
Acsl3	0	0	-1.88394	0	0	0	0	0	-1.30941	0	0	0	0	0	0	0	0	0	0	0	0	0	0	0
Acsm1	0	0	0	0	-3.20313	0	0	0	-2.65286	0	0	0	0	0	0	0	0	0	-2.56724	0	0	0	0	0
Acsm2	-2.56041	0	-1.41913	0	-3.48906	0	-3.04311	0	-2.51433	0	-3.60263	0	-3.1052	0	-3.75488	0	-1.2664	0	-3.39344	0	-4.37005	0	0	0
Acsm5	-5.75254	0	-2.69387	-1.58929	0	0	0	0	0	0	0	0	0	0	0	0	0	0	0	0	0	0	0	0
Acss1	0	0	-1.94684	-1.46791	0	0	0	0	0	0	0	0	0	0	0	0	0	0	0	0	-3.08149	0	0	0
Acss2	0	0	-1.16406	0	0	0	0	0	0	0	0	0	0	0	0	0	0	0	0	0	0	0	0	0
Acss2os	0	0	0	-1.7081	0	0	0	0	0	0	0	0	0	0	0	0	0	0	0	0	0	0	0	0
Acss3	0	0	0	0	0	0	0	0	0	0	-1.16925	-1.24908	0	0	0	0	0	0	0	0	0	0	0	0
Acvr2a	0	0	0	0	0	0	0	0	0	0	0	0	0	0	0	0	0	0	0	0	0	-1.42058	0	0
Acvr2b	0	0	-2.73068	-1.43904	0	0	0	0	0	0	0	0	0	0	0	0	0	0	-2.66121	0	0	0	0	0
Acy1	0	0	-2.62089	-1.10602	0	0	0	0	0	0	0	0	0	0	0	0	0	0	-5.88986	0	0	0	0	0
Acy3	0	0	0	0	0	0	-1.01872	0	-1.30069	0	0	0	0	0	0	0	0	0	0	0	0	0	0	0
Adam12	0	0	0	0	0	0	0	0	0	0	0	0	0	0	0	0	0	0	0	0	0	-1.09765	0	0
Adam22	0	0	0	0	0	0	-1.27363	0	-1.09428	0	0	0	-2.00436	-1.68918	0	0	0	0	0	0	-3.19365	-2.0623	0	0
Adamts16	0	0	0	0	0	0	0	0	0	0	0	0	0	-3.47272	0	0	0	0	0	0	0	0	0	0
Adamts3	0	0	0	0	0	0	0	0	0	0	-1.36391	-1.04207	0	0	0	0	0	0	0	0	0	0	0	0
Adamts5	0	0	0	0	0	0	0	0	0	0	0	0	0	0	0	0	0	0	0	0	-2.61716	-2.83831	0	0
Adamts9	0	0	0	0	0	0	0	0	0	0	0	0	0	0	0	0	0	0	0	0	0	-1.34537	0	0
Adamtsl2	0	0	0	0	0	0	0	0	-4.17287	0	0	0	0	0	0	0	0	0	0	0	0	0	0	0
Adamtsl3	0	0	0	0	0	0	0	0	-4.96272	0	0	0	0	0	0	0	0	0	0	0	0	0	0	0
Adap2	0	0	0	0	0	0	0	0	0	0	0	0	0	0	0	0	0	0	0	0	0	-2.72724	0	0
Adap2os	0	0	0	0	0	0	0	0	0	0	0	0	0	0	0	0	0	0	0	0	0	-3.07487	0	0
Adat1	0	0	0	0	0	0	0	0	0	0	0	0	0	0	0	0	0	0	0	0	0	0	-4.23405	0
Adck1	0	0	0	0	0	0	0	0	0	0	-1.12158	0	0	0	0	0	0	0	0	0	0	0	0	0
Adcy1	0	0	0	0	0	0	-1.17402	0	0	0	0	0	0	0	0	0	0	0	0	0	0	0	0	0
Adcy5	-1.5547	0	0	0	0	0	0	0	0	0	0	0	0	0	0	0	0	0	0	0	0	-2.08173	0	0
Adcy9	0	0	0	0	0	0	0	0	0	0	0	0	0	0	0	0	-1.06214	0	0	0	0	0	0	0
Add3	0	0	-1.21309	0	0	0	0	0	0	0	-1.45552	0	0	0	0	0	0	0	0	0	0	0	0	0
Adgra2	0	0	-1.81997	0	0	0	0	0	0	0	0	0	0	0	0	0	0	0	0	0	0	0	0	0
Adgrb3	0	0	-3.68547	-2.16202	0	0	0	0	0	0	0	0	0	0	0	0	0	0	0	0	0	-2.69923	0	0
Adgrl1	0	0	-1.15531	0	0	0	0	0	0	0	0	0	0	0	0	0	0	0	0	0	0	0	0	0
Adgrv1	0	0	0	0	0	0	0	0	0	0	0	0	0	-2.85554	0	0	0	0	0	0	0	0	0	0
Adhfe1	0	0	-1.67945	-1.55207	0	0	-1.60099	-1.22911	-1.36503	0	-1.68818	-1.55363	-1.34535	0	-1.7025	0	-1.7361	0	0	0	0	-2.07629	0	0
Adra1a	0	0	-1.15553	-1.16492	0	0	0	0	0	0	0	0	0	0	0	0	0	0	0	0	-3.60232	0	0	0
Adra1b	0	0	0	0	0	0	0	0	0	0	0	0	0	0	0	0	0	0	0	0	0	-1.91994	0	0
Adtrp	0	0	-1.92	-1.14039	0	0	0	0	0	0	0	0	0	0	0	0	0	0	0	0	0	0	0	0
Aebp1	0	0	0	0	0	0	0	0	-1.16545	-1.33439	-1.80827	0	0	0	0	0	0	0	0	0	0	0	0	0
Afap1l1	0	0	-1.23368	0	0	0	0	0	0	0	0	0	0	0	0	0	0	0	0	0	0	0	-3.15098	0
Aff3	-1.91006	0	0	0	0	0	0	0	0	0	0	0	0	0	0	0	0	0	0	0	0	0	0	0
Afm	0	0	-3.17632	-2.49149	0	0	-2.92371	-1.68212	-2.14519	-1.78899	-3.39091	-2.29038	0	0	0	0	0	0	0	0	0	0	0	0
Agbl1	0	0	0	-2.06787	0	0	0	0	0	0	0	0	0	0	0	0	0	0	0	0	0	0	0	0
Agbl5	0	0	0	0	0	0	0	0	0	0	0	0	0	0	0	0	0	0	0	0	0	-2.0659	0	0
Agmo	0	0	0	0	0	0	0	0	0	0	0	0	0	0	0	0	0	0	0	0	0	-2.45705	0	0
Agtr1a	0	0	0	0	0	0	0	0	0	0	0	0	0	0	0	0	0	0	0	0	0	-1.80963	0	0
Agxt2	0	0	-1.34831	0	0	0	0	0	0	0	0	0	0	0	0	0	0	0	0	0	0	0	0	0
Ahcy	0	0	-1.19366	0	0	0	0	0	0	0	0	0	0	0	0	0	0	0	0	0	0	0	0	0
AI314278	0	0	-1.62471	-1.28103	0	0	-1.66545	0	-2.01736	0	0	0	0	0	0	0	0	0	-2.92771	0	-3.49402	0	0	0
AI838599	0	0	0	0	0	0	0	-1.20638	-2.01711	0	-1.22883	-1.04664	0	-1.69069	0	0	0	0	0	0	0	0	0	0
Airn	0	0	0	0	0	0	0	0	0	0	0	0	0	0	0	0	0	0	-1.57756	0	0	0	0	0
Ak1	0	0	0	0	0	0	-1.31431	0	0	0	0	0	0	0	0	0	0	0	0	0	0	0	0	0
Ak3	0	0	0	0	0	0	-1.09048	0	0	0	0	0	0	0	0	0	0	0	0	0	0	0	0	0
Ak4	-4.41057	0	-3.61657	-2.34036	0	0	-3.28074	0	-3.85329	0	-2.44844	0	-3.54097	0	0	0	0	0	-3.95382	-2.18197	-4.27512	0	0	0
Ak5	0	0	0	0	0	0	0	0	0	0	0	0	0	0	0	0	0	0	0	0	0	-1.62872	0	0
Akap8l	0	0	0	0	0	0	0	0	0	0	0	0	0	-1.20569	0	0	0	0	0	0	0	0	0	0
Akr1a1	0	0	-1.45009	0	0	0	0	0	0	0	0	0	0	0	0	0	0	0	0	0	0	0	0	0
Akr1c14	0	0	-1.89285	0	0	0	0	0	0	0	0	0	0	0	0	0	0	0	0	0	0	0	0	0
Akr1c19	0	0	0	0	0	0	-1.04038	0	0	0	0	-1.26428	0	-1.64085	0	0	0	0	0	0	0	0	0	0
Akr1c21	-2.23609	0	-2.29417	0	0	0	-2.74288	0	-2.67615	0	-2.67694	0	-3.17777	0	-3.07225	0	-2.68569	0	-3.65215	0	-3.63901	0	0	0
Akr1d1	0	0	-3.77666	-1.50413	0	0	0	0	0	0	0	0	0	0	0	0	0	0	0	0	-7.29567	0	0	0
Akr7a5	0	0	-1.52828	0	-2.47228	0	-1.06046	0	-1.40353	0	0	0	0	0	0	0	0	0	-2.86616	0	-3.56878	0	0	0
Alad	0	0	-1.02623	0	0	0	0	0	0	0	0	0	0	0	0	0	0	0	0	0	0	0	0	0
Aldh2	0	0	0	0	0	0	-1.00619	0	0	0	0	0	0	0	0	0	0	0	-1.78499	0	-1.80408	0	0	0
Aldh5a1	0	0	-1.08888	0	0	0	0	0	0	0	0	0	0	0	0	0	0	0	0	0	0	0	0	0
Aldh6a1	0	0	0	0	0	0	0	0	0	0	0	0	-1.44262	0	-1.35584	0	0	0	-2.16733	0	0	0	0	0
Aldh7a1	0	0	-1.08587	0	0	0	0	0	0	0	0	0	0	0	0	0	0	0	-2.23275	0	0	0	0	0
Aldh8a1	0	0	-1.81115	0	0	0	-2.22789	0	-2.58058	0	-3.11739	0	-2.28366	0	0	0	0	0	-2.88774	0	-3.52411	0	0	0
Aldh9a1	0	0	-2.23796	-1.52035	0	0	-1.04642	0	0	0	0	0	0	0	0	0	0	0	-2.58291	0	0	0	0	0
Aldob	-2.28196	0	-1.46729	0	0	0	-1.88324	0	-2.41991	0	-2.14466	0	-2.16228	0	-1.89801	0	-2.11955	0	-2.82555	0	-2.83243	0	0	0
Aldoc	0	0	0	0	0	0	-1.37156	0	0	0	0	0	0	0	0	0	0	0	0	0	0	0	0	0
Alk	0	0	-2.86964	0	0	0	0	0	0	0	0	0	0	0	0	0	0	0	0	0	0	0	0	0
Alpl	-3.53868	0	-2.24079	0	0	0	-1.57711	0	-2.0778	0	0	0	0	0	0	0	0	0	0	0	0	0	0	0
Als2cr12	0	0	-1.29551	0	0	0	0	0	0	0	0	0	0	0	0	0	0	0	0	0	0	0	0	0
Amacr	0	0	-1.58729	0	0	0	0	0	0	0	0	0	0	0	0	0	0	0	0	0	0	0	0	0
Amfr	0	0	0	0	0	0	0	0	0	0	0	0	0	0	-1.62801	0	0	0	0	0	0	0	0	0
Amn	-6.0534	0	-2.07311	0	0	0	0	0	-2.49012	0	0	0	0	0	0	0	0	0	0	0	0	0	0	0
Ampd3	0	0	0	0	0	-1.04991	0	0	0	0	0	0	0	0	0	0	0	0	0	0	0	0	0	0
Anapc13	0	0	0	0	0	0	-1.07276	0	0	0	0	0	0	0	0	0	0	0	0	0	0	0	0	0
Angpt1	0	0	0	0	0	0	0	0	0	0	0	0	0	0	0	0	0	0	0	0	0	-1.83752	0	0
Angptl2	-1.53269	0	0	0	0	0	0	0	0	0	0	0	0	-1.63531	0	0	0	0	0	0	0	-1.91016	0	0
Angptl3	0	0	0	0	0	0	0	0	0	0	0	0	0	-2.26977	0	0	0	0	0	0	0	0	0	0
Angptl7	0	0	0	-3.08375	0	0	0	0	0	0	0	0	0	0	0	0	0	0	0	-2.69087	0	0	0	0
Ank2	0	0	0	0	0	-1.64724	0	0	-1.15347	0	0	0	0	0	0	0	0	0	0	0	0	0	0	0
Ankrd24	0	0	0	0	0	0	0	0	0	0	0	0	0	0	0	0	-1.4522	0	0	0	0	0	0	0
Ankrd65	0	0	-3.29121	0	0	0	0	0	0	0	0	0	0	0	0	0	0	0	0	0	0	0	0	0
Ankrd9	0	0	0	0	0	0	0	0	0	0	0	0	-2.06311	0	0	0	0	0	0	0	0	0	0	0
Anks1	0	0	0	0	0	0	0	0	-1.00666	0	0	0	0	0	0	0	0	0	0	0	0	0	0	0
Anks1b	0	0	-1.13126	0	0	0	0	0	0	0	0	0	0	0	0	0	0	0	0	0	0	0	0	0
Ano4	0	0	0	0	0	0	-2.2257	-1.28509	0	0	0	0	0	0	0	0	0	0	0	0	0	0	0	0
Ano5	0	0	0	0	0	0	0	0	0	0	0	0	0	0	0	0	0	0	0	0	0	-2.50969	0	0
Anpep	0	0	-2.13233	0	0	0	0	0	0	0	0	0	0	0	0	0	0	0	0	0	0	0	0	0
Anxa11os	0	0	0	0	0	0	0	0	0	0	0	0	0	-2.41886	0	0	0	0	0	0	0	0	0	0
Anxa9	0	0	0	0	0	0	0	0	0	0	0	0	0	0	0	0	0	0	0	0	0	0	-3.86894	0
Aoah	0	0	-1.32879	0	0	0	0	0	0	0	0	0	0	0	0	0	0	0	0	0	0	0	0	0
Ap1g2	0	0	0	0	0	0	0	0	0	0	0	0	-1.80582	0	0	0	0	0	0	0	0	0	0	0
Apbb2	0	0	-1.22061	0	0	0	0	0	0	0	0	0	0	0	0	0	0	0	0	0	0	0	0	0
Apeh	0	0	-1.13538	0	0	0	0	0	0	0	0	0	0	0	0	0	0	0	0	0	0	0	0	0
Apela	0	0	0	0	0	0	0	0	0	0	0	0	0	-1.04786	0	0	0	0	0	0	0	0	0	0
Aph1b	0	0	0	0	0	0	0	0	0	0	0	0	0	0	0	0	0	0	0	0	0	0	0	0
Apom	0	0	0	0	-6.42775	0	0	0	0	0	0	0	0	0	0	0	0	0	0	0	0	0	0	0
Aqp1	0	0	-1.37684	0	0	0	-1.02588	0	0	0	-1.53602	0	0	0	0	0	0	0	0	0	0	0	0	0
Aqp11	0	0	-2.2943	-1.36207	0	0	0	0	0	0	0	0	0	0	0	0	0	0	0	0	0	0	0	0
Aqp2	0	0	0	-1.30365	0	0	0	0	0	0	0	0	0	0	0	0	0	0	0	-1.26797	0	0	0	0
Aqp3	0	0	0	0	0	0	0	0	0	0	0	0	0	0	-3.75319	0	0	0	0	0	0	0	0	0
Aqp4	0	0	0	-2.85118	0	0	0	0	0	0	0	0	0	0	0	0	0	0	0	0	0	0	0	0
Aqp5	0	0	0	0	0	0	0	0	0	0	0	0	0	0	0	0	0	0	0	0	-5.66359	0	0	0
Arglu1	0	0	0	0	0	0	0	0	0	0	0	0	0	-1.30759	0	0	0	0	0	0	0	0	0	0
Arhgap18	0	0	0	0	0	0	0	0	0	0	0	0	0	0	0	-1.2554	0	0	0	0	0	0	0	0
Arhgap24	0	0	0	0	0	0	0	0	0	0	0	0	0	-1.10064	-1.38569	0	-1.11427	0	0	0	0	-1.62124	0	0
Arhgap32	0	0	-1.21081	0	0	0	0	0	0	0	0	0	0	0	0	0	0	0	0	0	0	0	0	0
Arhgap6	0	0	0	0	0	0	0	0	0	0	0	0	0	0	0	0	0	0	0	0	0	-1.05819	0	0
Arhgdig	0	0	0	0	0	0	0	0	0	0	0	0	-3.11496	0	0	0	0	0	0	0	0	0	0	0
Arhgef38	0	0	0	0	0	0	0	0	0	0	0	0	0	0	0	-1.00196	0	0	0	0	0	0	0	0
Arid3b	0	0	0	0	0	0	0	0	0	0	0	0	0	0	0	0	-1.26611	0	0	0	0	0	0	0
Arl4d	0	0	0	0	0	0	0	0	0	0	0	0	0	0	0	0	-2.18303	0	0	0	0	0	0	0
Arl6ip1	0	0	0	0	0	0	-1.02308	0	-1.35649	0	0	0	0	0	0	0	0	0	0	0	0	0	0	0
Armt1	0	0	0	0	0	0	0	0	0	0	0	0	0	-1.18564	0	0	0	0	0	0	0	0	0	0
Arnt2	0	0	0	0	0	0	0	0	-1.19573	0	0	0	0	0	0	0	0	0	0	0	0	0	0	0
Arrb1	0	0	0	0	0	0	-1.06693	0	0	0	0	0	0	0	0	0	0	0	0	0	0	0	0	0
Arvcf	0	0	0	0	0	0	0	0	0	0	0	0	0	0	0	0	0	0	0	0	-2.31672	-1.82635	0	0
Asap2	0	0	0	0	0	0	0	0	0	0	0	0	0	-1.14961	0	0	0	0	0	0	0	0	0	0
Asb11	0	0	0	0	0	0	0	0	0	-3.23066	0	0	0	0	0	0	0	0	0	0	0	0	0	0
Asb9	0	0	0	0	0	0	-1.56951	0	0	0	0	0	0	0	0	0	0	0	0	0	0	0	0	0
Ascc1	0	0	-1.3143	0	0	0	0	0	0	0	0	0	0	0	0	0	0	0	0	0	0	0	0	0
Asl	0	0	-2.38869	-1.71036	0	0	-1.02124	0	0	0	0	0	-1.53247	0	0	0	-1.90378	0	0	0	0	0	0	0
Aspa	0	0	-1.40669	-1.04992	0	0	-1.7387	0	0	0	-2.59363	0	0	0	0	0	0	0	0	0	0	0	0	0
Aspdh	0	0	-2.82719	-2.12065	-6.22108	0	0	0	0	0	0	0	0	0	0	0	0	0	0	0	0	0	0	0
Aspg	0	0	-1.62412	-1.12378	0	0	0	0	0	0	0	0	0	0	0	0	0	0	0	0	0	0	0	0
Asph	0	0	-1.01829	0	0	0	0	0	0	0	0	0	0	0	0	0	-1.57313	0	0	0	0	0	0	0
Ass1	-3.10114	0	-2.48624	-1.45431	-2.48447	0	-2.22874	0	-2.47231	-1.40283	-2.70398	0	-2.23871	0	-3.2612	0	-1.87226	0	-3.13196	0	-2.96023	0	0	0
Astn2	0	0	0	0	0	0	0	0	0	0	0	0	0	0	0	0	0	0	0	0	0	-1.64367	0	0
Atf7ip2	0	0	0	0	0	0	0	0	0	0	0	0	0	0	0	0	0	0	0	0	-5.89021	-4.63081	0	0
Atg10	0	0	0	0	0	0	0	0	0	0	-1.22619	0	-1.19198	0	0	0	0	0	0	0	0	0	0	0
Atg4b	0	0	0	0	0	0	0	0	0	0	0	0	0	0	0	0	-1.39194	0	0	0	0	0	0	0
Atl1	0	0	0	0	0	0	0	0	0	0	0	0	0	0	0	0	0	0	0	0	0	0	-3.47326	0
Atp10b	0	0	0	0	0	-2.08683	-1.06846	0	0	0	0	0	0	-1.21014	0	0	0	0	0	0	0	0	0	0
Atp1a1	0	0	0	0	0	0	-1.16065	0	0	0	0	0	0	0	0	0	0	0	0	0	0	0	0	0
Atp1a2	0	0	0	0	0	0	0	0	0	0	0	0	0	0	0	0	0	0	0	0	-4.29807	0	0	0
Atp1b1	0	0	0	0	0	0	0	0	0	0	0	0	0	0	0	0	0	0	-1.31072	0	-1.86242	0	0	0
Atp1b2	0	0	0	0	0	0	0	0	0	0	0	0	0	0	0	0	0	0	0	0	0	-1.97342	0	0
Atp2b2	0	0	0	0	0	0	0	0	-1.45551	0	-1.71945	-1.08605	0	-1.86736	0	0	0	0	0	0	0	0	0	0
Atp2b4	0	0	0	0	0	0	0	0	-1.28717	0	0	0	0	0	0	0	0	0	0	0	0	0	0	0
Atp4a	0	0	0	0	0	0	-1.55231	0	0	0	0	0	0	0	0	0	0	0	0	0	0	0	0	0
Atp5a1	0	0	0	0	0	0	-1.01183	0	0	0	0	0	0	0	0	0	0	0	0	0	0	0	0	0
Atp5b	0	0	0	0	0	0	-1.05449	0	0	0	0	0	0	0	0	0	0	0	0	0	0	0	0	0
Atp5g1	0	0	0	0	0	0	-1.21684	0	0	0	0	0	0	0	0	0	0	0	0	0	0	0	0	0
Atp5h	0	0	0	0	0	0	-1.43773	0	0	0	0	0	0	0	0	0	0	0	0	0	0	0	0	0
Atp5j2	0	0	0	0	0	0	-1.04388	0	0	0	0	0	0	0	0	0	0	0	0	0	0	0	0	0
Atp5o	0	0	0	0	0	0	0	0	0	0	0	0	0	-1.30964	0	0	0	0	0	0	0	0	0	0
Atp6ap1	0	0	0	0	0	0	0	0	0	0	0	0	0	0	0	0	-1.03266	0	0	0	0	0	0	0
Atp6v1b1	0	0	0	0	0	0	-1.44998	0	0	0	0	0	0	0	0	0	0	0	0	0	0	0	0	0
Atp6v1c2	0	0	0	0	0	0	0	-1.37494	-3.35452	-1.6701	-3.28426	0	0	0	0	0	-1.39441	0	0	0	0	0	0	0
Atp6v1g3	0	0	0	0	0	0	0	0	0	0	0	0	0	0	-1.06165	0	0	0	0	0	0	0	0	0
Atp8b4	0	0	-2.45308	0	0	0	0	0	0	0	0	0	0	0	0	0	0	0	0	0	0	0	0	0
Atp8b5	0	0	0	0	0	0	0	0	0	0	0	0	0	-1.21108	0	0	0	0	0	0	0	0	0	0
Atxn1	0	0	-1.11444	0	0	0	0	0	0	0	0	0	0	0	0	0	0	0	0	0	0	0	0	0
Atxn7l2	0	0	-2.30019	-1.85255	0	0	0	0	0	0	0	0	0	0	0	0	0	0	0	0	0	0	0	0
AU021092	0	0	0	0	0	0	0	0	0	0	0	0	0	0	0	0	0	0	0	-1.02393	0	0	0	0
AY036118	-1.03819	0	0	0	0	0	0	0	0	0	0	0	0	0	0	0	0	0	0	0	0	0	0	0
B230369F24Rik	0	0	0	0	0	0	-1.44949	0	0	0	0	0	0	0	0	0	0	0	0	0	0	0	0	0
B3galnt1	0	0	-3.02597	-1.64941	0	0	0	0	0	0	0	0	0	0	0	0	0	0	0	0	0	0	0	0
B3galt2	0	0	0	0	0	0	0	-1.14048	0	0	0	0	0	-2.1321	0	0	0	0	0	0	0	0	0	0
B3galt5	0	0	-1.31017	0	0	0	0	0	0	0	0	0	0	0	0	0	0	0	0	0	0	0	0	0
B3gat2	0	0	-1.30603	0	0	0	0	0	0	0	0	0	0	0	0	0	0	0	0	0	0	0	0	0
B3glct	0	0	0	0	0	0	0	0	0	0	0	0	0	0	0	0	0	0	0	0	0	-1.45948	0	0
B430010I23Rik	0	0	-1.16767	0	0	0	0	0	0	0	0	0	0	0	0	0	0	0	0	0	0	0	0	0
B4galnt3	0	0	-1.24374	0	0	0	0	0	0	0	0	0	-2.04817	-1.37536	0	0	0	0	0	0	-4.46525	0	0	0
Bag1	0	0	0	0	0	0	-1.03806	0	0	0	0	0	0	0	0	0	0	0	0	0	0	0	0	0
Bahcc1	0	0	0	0	0	0	-1.32307	0	0	0	0	0	0	0	0	0	0	0	0	0	0	0	0	0
Baiap2	0	0	-1.6491	0	0	0	0	0	0	0	0	0	-2.42865	0	0	0	-1.49093	0	0	0	0	0	0	0
Baiap2l2	0	0	0	0	0	0	0	0	0	0	0	0	0	0	0	0	-1.77661	0	0	0	0	0	0	0
Batf3	0	0	0	0	0	0	0	0	-2.65385	0	0	0	0	0	0	0	0	0	0	0	0	0	0	0
BB365896	0	0	0	-2.14819	0	0	0	-1.8438	0	0	0	0	0	0	0	-2.24325	0	0	0	0	0	0	0	0
Bbox1	0	0	0	-1.32565	0	0	0	0	0	0	0	0	0	0	0	0	0	0	0	0	0	0	0	0
Bbs9	0	0	0	0	0	0	0	0	0	0	0	0	-1.60653	0	0	0	0	0	0	0	0	0	0	0
Bcar3	0	0	0	0	0	0	0	0	-1.0052	0	0	0	0	0	0	0	0	0	0	0	0	0	0	0
Bcas3os1	0	0	0	0	0	0	0	-1.0907	0	0	0	0	0	-1.79223	0	0	0	0	0	0	0	0	0	0
Bcat1	0	0	0	0	0	0	0	0	0	0	0	0	0	0	0	0	0	0	0	0	0	0	-3.88293	0
Bcat2	0	0	0	-1.14831	0	0	-1.18354	0	-1.37044	0	-1.36626	0	0	0	0	0	0	0	0	0	0	0	0	0
Bckdha	0	0	-1.17027	0	0	0	-1.10406	0	-1.31354	0	0	0	0	0	0	0	-1.22267	0	-1.88962	0	0	0	0	0
Bckdhb	0	0	-1.13517	0	0	0	-1.39612	0	-1.66532	0	-1.88641	0	-1.44209	-1.09438	0	0	-1.63469	0	0	0	0	0	0	0
Bcl11b	0	0	-1.42405	0	0	0	0	0	0	0	0	0	0	0	0	0	0	0	0	0	0	0	0	0
Bco2	0	0	-1.81622	0	0	0	0	0	0	0	0	0	0	0	0	0	0	0	0	0	0	0	0	0
Bdh1	0	0	-2.24222	0	0	0	-1.07255	0	0	0	0	0	0	0	0	0	0	0	0	0	0	0	0	0
Bdh2	0	0	-1.24909	0	0	0	-1.2046	0	-2.43462	0	0	0	0	0	-2.91661	0	0	0	0	0	0	0	0	0
Best3	0	0	0	0	0	0	0	0	0	0	-2.4452	0	-2.44019	0	0	0	0	0	0	0	0	0	0	0
Bhlhe41	-2.58472	0	0	0	0	0	0	0	0	0	0	0	0	0	0	0	0	0	0	0	0	0	0	0
Bhmt2	0	0	-1.92173	-1.35326	-4.23794	0	0	0	0	0	0	0	0	0	0	0	0	0	0	0	0	0	0	0
Bmp4	0	0	0	0	0	0	-1.99375	0	0	0	0	0	0	0	0	0	0	0	0	0	0	0	0	0
Bmp5	0	0	0	0	0	0	-1.78179	-1.05387	0	0	0	0	0	0	0	0	0	0	0	0	0	0	0	0
Bmp6	0	0	0	0	0	0	0	0	-2.04289	0	0	0	0	0	0	0	0	0	0	0	0	-1.42513	0	0
Bmp7	0	0	-1.78725	0	0	0	-1.57553	0	0	0	0	0	0	0	0	0	0	0	0	0	0	0	0	0
Boc	0	0	0	0	0	0	0	0	0	0	0	0	0	0	0	0	0	0	-1.7216	-1.03114	0	0	0	0
Bphl	0	0	-1.38838	0	0	0	0	0	0	0	0	0	0	0	0	0	0	0	-2.92808	0	0	0	0	0
Bpnt1	0	0	0	0	0	0	-1.26343	0	0	0	0	0	0	0	0	0	0	0	0	0	0	0	0	0
Bsnd	0	0	0	0	0	0	-1.57226	0	0	0	0	0	0	0	0	0	-1.64849	0	0	0	0	0	0	0
Btbd11	0	0	-1.91279	0	-4.35947	0	0	0	0	0	0	0	0	0	0	0	-2.02874	0	0	0	0	0	0	0
Btbd3	0	0	0	0	0	0	0	0	0	0	0	0	0	0	0	0	0	0	0	0	0	-1.52524	0	0
Btc	0	0	-1.51001	0	0	0	0	0	0	0	0	0	0	0	0	0	0	0	0	0	0	0	0	0
Btg2	0	0	0	0	0	0	0	0	0	0	0	0	0	0	0	-1.37999	0	0	0	0	0	0	0	0
Btnl9	0	0	0	0	0	0	0	0	0	0	0	0	0	0	0	0	0	0	-8.58341	-4.01732	0	0	0	0
C130050O18Rik	0	0	0	0	0	0	0	0	-2.18792	-2.0866	-1.96345	-1.26004	0	0	0	0	0	0	0	0	0	0	0	0
C1qtnf3	0	0	-2.4062	-1.09522	0	0	0	0	0	0	0	0	0	0	0	0	0	0	0	0	0	0	0	0
C1qtnf7	0	0	0	0	0	0	0	0	0	0	0	0	0	0	0	0	0	0	0	0	0	-1.59447	0	0
C230037L18Rik	0	0	0	0	0	0	-1.59564	-1.0628	0	0	0	0	0	0	0	0	0	0	0	0	0	0	0	0
C230088H06Rik	0	0	0	0	0	0	0	-1.11762	0	0	0	0	0	-1.656	0	0	0	0	0	0	0	0	0	0
C2cd2l	0	0	-1.22715	0	0	0	0	0	0	0	0	0	0	0	0	0	0	0	0	0	0	0	0	0
C330002G04Rik	0	0	-2.55608	-1.10903	-6.49799	0	0	0	0	0	-2.2029	0	0	0	0	0	0	0	0	0	0	0	0	0
C7	0	0	0	0	0	0	0	0	0	0	0	0	0	0	0	0	0	0	0	0	0	-1.77727	0	0
C730034F03Rik	0	0	0	0	0	0	0	-1.15872	0	0	0	0	0	0	0	0	0	0	0	0	0	0	0	0
C78859	0	0	0	0	0	0	0	0	0	0	-2.62841	0	0	0	0	0	0	0	0	0	0	0	0	0
C8a	0	0	-3.11007	-1.10252	-5.02028	0	0	0	0	0	0	0	0	0	0	0	0	0	0	0	0	0	0	0
C920021L13Rik	0	0	-1.31066	-1.08031	0	0	-1.18663	0	0	0	0	0	0	0	0	0	0	0	0	0	0	0	0	0
Caap1	0	0	0	0	0	0	0	0	0	0	0	0	-1.12872	0	0	0	0	0	0	0	0	0	0	0
Cab39l	0	0	0	0	0	0	0	0	0	0	-1.13533	0	0	0	0	0	0	0	0	0	0	0	0	0
Cabcoco1	0	0	0	0	0	0	-1.50589	0	-1.31652	0	-1.30254	0	0	-1.56338	0	0	0	0	0	0	0	0	0	0
Cables1	0	0	0	0	0	0	0	-1.03534	-2.69117	-2.69959	0	-1.75386	0	0	0	0	0	0	0	0	0	0	0	0
Cacna1a	0	0	0	0	0	0	0	0	0	0	0	0	0	0	0	0	0	0	0	0	0	-2.36727	0	0
Cacna1d	0	0	0	0	0	0	0	0	0	0	0	0	-1.44295	-1.10742	0	0	0	0	0	0	0	0	0	0
Cadm2	0	0	0	0	0	0	-1.21461	0	0	0	0	0	-3.29396	0	0	0	0	0	0	0	0	0	0	0
Cadm4	0	0	0	0	0	0	-1.13004	0	0	0	0	0	0	0	0	0	0	0	0	0	0	0	0	0
Calb1	0	0	-1.05838	0	0	0	0	0	-1.61165	0	-1.76333	0	0	0	0	0	0	0	0	0	0	0	0	0
Calml3	0	0	0	0	0	0	0	0	0	0	0	0	0	0	0	0	0	0	0	0	0	0	0	-5.1762
Calml4	0	0	0	0	0	0	-1.22095	0	-1.54875	0	0	0	0	0	0	0	0	0	0	0	0	0	0	0
Capn6	0	0	0	0	0	0	0	0	-1.87611	0	0	0	0	0	0	0	0	0	0	0	0	0	0	0
Car12	0	0	-3.17093	-1.704	0	0	0	0	0	0	-1.30786	0	-2.78619	0	0	0	-2.14597	0	0	0	0	0	0	0
Car14	0	0	-4.45988	-2.97201	0	0	0	0	0	0	0	0	-6.26739	0	0	0	0	0	-5.03223	0	0	0	0	0
Car2	0	0	0	0	0	0	0	0	-1.89123	0	0	0	0	0	-1.20145	0	-1.05483	0	-2.07343	0	-2.46201	0	0	0
Car4	0	0	-1.85457	-1.08133	0	0	-2.3644	-1.12803	0	0	0	0	0	0	0	0	0	0	-4.0064	0	-5.0958	0	0	0
Carmn	0	0	0	0	0	0	0	0	0	0	0	0	0	0	0	0	0	0	0	0	0	-1.20078	0	0
Casr	0	0	0	0	0	0	-1.34205	0	0	0	0	0	0	0	0	0	-2.13858	0	0	0	0	0	0	0
Cat	0	0	-1.64621	-1.20203	0	0	-1.49469	0	-1.85172	0	0	0	0	0	0	0	0	0	-2.04372	0	-2.28088	0	0	0
Catsper3	0	0	0	0	0	0	0	0	0	0	0	0	-3.33461	0	0	0	0	0	0	0	0	0	0	0
Catspere2	0	0	-1.35595	0	0	0	0	0	0	0	0	0	0	0	0	0	0	0	0	0	0	0	0	0
Cavin2	0	0	0	0	0	0	0	0	0	0	-1.88186	0	-4.23601	0	0	0	0	0	0	0	0	0	0	0
Cbr3	0	0	0	0	0	0	0	0	0	0	0	0	0	0	0	0	0	0	0	0	0	0	-4.59326	0
Ccbe1	0	0	0	0	0	0	0	0	0	0	0	0	0	0	0	0	0	0	0	0	0	-2.02771	0	0
Ccdc107	0	0	-1.06179	-1.01109	0	0	-1.01936	0	-1.18638	0	0	0	0	0	0	0	0	0	0	0	0	0	0	0
Ccdc162	0	0	-1.14485	0	0	0	0	0	0	0	0	0	0	0	0	0	0	0	0	0	0	0	0	0
Ccdc189	0	0	0	0	0	0	-1.45779	0	0	0	0	0	0	0	0	0	0	0	0	0	0	0	0	0
Ccdc28a	0	0	0	0	0	0	0	0	0	0	0	0	0	0	0	0	0	0	0	0	0	-1.72756	0	0
Ccdc3	0	0	0	0	0	-2.63077	0	-1.47025	0	0	0	0	0	0	0	0	0	0	0	0	0	0	0	0
Ccdc62	0	0	-1.29407	0	0	0	0	0	-1.16202	0	0	0	0	0	0	0	0	0	0	0	0	0	0	0
Ccdc66	0	0	0	0	0	0	0	0	0	0	0	0	0	-1.21939	0	0	0	0	0	0	0	0	0	0
Ccdc68	0	0	0	0	0	0	-1.73183	0	-1.47336	0	0	0	0	0	0	0	0	0	0	0	0	0	0	0
Ccdc73	0	0	0	0	0	0	0	0	0	0	0	0	0	-2.14971	0	0	0	0	0	0	0	0	0	0
Ccdc85a	0	0	0	0	0	0	0	0	0	0	0	0	0	0	0	0	0	0	0	-1.07168	0	0	0	0
Cckar	0	0	-2.72063	0	-4.58933	0	0	0	0	0	0	0	0	0	0	0	0	0	0	0	0	0	0	0
Ccm2l	0	0	0	0	0	0	0	0	0	0	0	0	0	0	0	0	0	0	0	-1.10281	0	0	0	0
Ccnd1	0	0	0	0	0	0	-1.91522	0	0	0	0	0	0	0	0	0	0	0	0	0	0	0	0	0
Ccnd3	0	0	0	0	0	0	0	0	0	-1.2435	0	0	0	0	0	0	0	0	0	0	0	0	0	0
Ccs	0	0	-1.07855	0	0	0	0	0	0	0	0	0	0	0	0	0	-1.34583	0	0	0	0	0	0	0
Cct6b	0	0	-1.72563	0	0	0	0	0	0	0	0	0	0	0	0	0	0	0	0	0	0	0	0	0
Cd164	0	0	0	0	0	0	0	0	0	0	0	0	-1.16214	0	0	0	0	0	0	0	0	0	0	0
Cd300lg	0	0	0	0	0	0	0	0	0	0	0	0	0	0	0	0	0	0	-2.29758	-1.8532	0	0	0	0
Cd36	0	0	0	0	0	0	-1.63785	0	-1.97836	0	0	0	0	0	0	0	0	0	0	0	0	0	0	0
Cd46	0	0	0	0	0	0	0	0	0	0	0	0	0	0	0	0	0	0	0	0	0	-1.68558	0	0
Cd59a	0	0	0	0	0	0	0	0	0	0	0	0	-1.41683	0	0	0	0	0	0	0	0	0	0	0
Cd59b	0	0	0	0	-2.37826	-1.82071	0	0	0	0	0	0	-2.38825	-1.59287	0	0	0	0	0	0	0	0	0	0
Cda	0	0	0	-1.26363	0	0	0	0	0	0	-1.62887	0	0	0	0	0	0	0	0	0	0	0	0	0
Cdca7l	0	0	0	0	0	0	0	0	-1.37458	0	0	0	0	0	0	0	0	0	0	0	0	0	0	0
Cdh13	0	0	0	0	0	0	0	0	0	0	0	0	0	-1.63497	0	0	0	0	0	0	0	-2.73295	0	0
Cdh4	0	0	-3.0015	-1.30049	0	0	0	0	0	0	0	0	0	0	0	0	0	0	0	0	0	0	0	0
Cdk14	0	0	0	0	0	0	0	0	-1.57349	-1.30725	0	0	0	0	0	0	0	0	0	0	0	0	0	0
Cdk8	0	0	0	0	0	0	0	0	0	0	0	0	0	0	0	0	0	0	-1.26131	0	0	0	0	0
Cdkl1	0	0	-2.56856	-1.1449	0	0	-1.18782	0	0	0	0	0	-1.25419	-1.1234	-1.2482	0	-1.25438	0	0	0	0	0	0	0
Cdkn1b	0	0	0	0	0	0	0	0	0	0	0	-1.22848	0	0	0	0	0	0	0	0	0	0	0	0
Cdkn2b	0	0	0	0	0	-1.76429	0	0	0	0	0	0	0	0	0	0	0	0	0	0	0	0	0	0
Cdon	0	0	0	0	0	-1.68431	0	0	0	0	0	0	0	0	0	0	0	0	0	0	0	0	0	0
Ceacam1	0	0	-2.3295	0	0	0	0	0	0	0	0	0	0	0	0	0	0	0	0	0	0	0	0	0
Ceacam2	0	0	-1.06934	0	0	0	0	0	0	0	0	0	0	0	0	0	0	0	0	0	0	0	0	0
Cela1	0	0	-1.78586	0	0	0	-1.96742	0	-1.87913	0	0	0	0	0	0	0	0	0	-3.51641	0	-2.84586	0	0	0
Celsr2	0	0	0	0	0	0	0	0	0	0	0	-1.26766	0	0	0	0	0	0	-3.28418	0	0	0	0	0
Ces1d	0	0	-4.19741	-3.60424	0	-2.5432	-3.49804	-2.85623	-3.06802	-2.3654	-4.27188	-2.18572	0	-2.72737	0	0	0	0	-5.88054	-2.7668	-5.71866	-2.87897	0	0
Ces1e	0	0	-4.64086	-3.70669	0	0	0	0	0	0	0	0	0	0	0	0	0	0	0	0	0	0	0	0
Ces1f	-3.82018	0	-3.04123	-1.97036	0	0	-2.93092	0	-4.03862	0	-3.34244	0	0	0	0	0	0	0	-3.51791	0	-5.15171	0	0	0
Ces2c	0	0	-1.15823	0	0	0	0	0	0	0	0	0	0	0	0	0	0	0	-2.8574	0	-4.29442	0	0	0
Ces2e	0	0	0	0	0	0	0	0	0	0	0	0	0	0	0	0	0	0	-3.51231	0	0	0	0	0
Cgnl1	0	0	0	0	0	0	0	0	0	0	0	0	-1.25077	0	0	0	0	0	0	0	0	0	0	0
Cgref1	0	0	-1.13991	0	0	0	0	0	0	0	0	0	0	0	0	0	0	0	0	0	0	0	0	0
Chchd10	0	0	0	0	0	0	-1.16126	0	0	0	0	0	0	0	0	0	0	0	-1.51557	0	-1.89574	0	0	0
Chchd6	0	0	0	0	0	0	-1.1877	0	0	0	0	0	0	0	0	0	0	0	0	0	0	0	0	0
Chd1l	0	0	0	0	0	0	0	0	0	0	-1.6992	0	0	0	0	0	0	0	0	0	0	0	0	0
Chd3	-1.41955	0	-1.43369	-1.22971	0	0	0	0	0	0	0	0	0	0	0	0	0	0	-1.9623	0	0	0	0	0
Chn1	0	0	0	0	0	0	0	0	0	0	0	0	0	0	0	0	0	0	0	0	0	-1.17992	0	0
Chn2	0	0	0	0	0	0	0	0	0	0	0	0	-1.45483	0	0	0	0	0	0	0	0	0	0	0
Chpf	0	0	0	0	-3.23025	0	0	0	0	0	0	0	0	0	0	0	0	0	0	0	0	0	0	0
Chpt1	0	0	0	0	0	0	0	0	0	0	0	0	0	0	0	0	0	0	-1.25768	0	-1.87358	0	0	0
Chrm3	0	0	-1.25728	0	0	0	0	0	0	0	0	0	0	0	0	0	0	0	0	-1.36152	0	0	0	0
Chrna4	0	0	-3.79317	-2.69407	0	0	0	0	-2.21243	0	0	0	0	0	0	0	0	0	-7.31178	0	0	0	0	0
Chrnb4	0	0	0	0	0	0	0	0	0	0	0	0	0	0	0	0	0	0	0	0	0	0	0	0
Chst3	0	0	-2.05971	0	0	0	0	0	0	0	0	0	0	0	0	0	0	0	0	0	0	0	0	0
Chst8	0	0	0	0	0	0	0	0	0	0	0	0	0	0	0	0	0	0	-2.82461	-1.66233	0	0	0	0
Chst9	0	0	0	0	0	0	-1.03207	0	0	0	0	0	-1.43116	-1.50496	0	0	0	0	0	0	0	0	0	0
Ciart	0	0	-3.14458	0	0	0	0	0	0	0	0	0	0	0	0	0	0	0	0	0	0	0	0	0
Cideb	0	0	0	0	0	0	-1.32841	0	0	0	0	0	0	0	0	0	0	0	0	0	0	0	0	0
Cipc	0	0	0	0	0	0	0	0	0	0	0	0	0	0	0	-1.27123	0	0	0	0	0	0	0	0
Cit	0	0	-2.26816	-1.09162	0	0	0	0	0	0	0	0	0	0	0	0	0	0	0	0	0	0	0	0
Ckb	0	0	0	0	0	0	-1.96596	-1.04161	-1.54914	0	0	0	0	0	0	0	0	0	0	0	0	0	0	0
Clca3a1	0	0	0	0	0	0	0	0	0	0	0	0	0	0	0	0	0	0	0	0	0	-2.47541	0	0
Clcn2	0	0	0	-1.17393	0	0	0	0	0	0	0	0	0	0	0	0	0	0	0	0	0	0	0	0
Clcnka	0	0	0	0	0	0	-1.06781	0	0	0	0	0	0	0	0	0	0	0	0	0	0	0	0	0
Cldn11	0	0	0	0	0	0	0	0	0	0	0	0	0	0	0	0	0	0	0	0	-7.22438	0	0	0
Cldn15	0	0	0	0	0	0	0	0	0	0	0	0	0	0	0	0	0	0	0	0	0	0	0	0
Clec2h	0	0	-3.12198	-2.95662	0	0	0	0	0	0	0	0	0	0	-5.86366	0	0	0	-5.63112	0	-4.56271	0	0	0
Cln3	0	0	0	0	0	-1.76133	-1.37271	0	0	0	0	0	0	0	0	0	0	0	0	0	0	0	0	0
Clnk	0	0	0	0	0	0	0	0	0	0	0	0	0	0	0	0	-2.13826	0	0	0	0	0	0	0
Clstn2	0	0	0	0	0	0	0	0	0	0	0	0	0	0	0	0	0	0	0	0	0	-2.33567	0	0
Cmah	0	0	-1.45951	0	0	0	0	0	0	0	0	0	0	0	0	0	0	0	0	0	0	0	0	0
Cmbl	0	0	-2.23349	-1.06222	0	0	0	0	0	0	-2.75838	0	0	0	0	0	0	0	-3.39459	0	0	0	0	0
Cmss1	-1.97491	0	-1.1333	0	0	0	-1.0038	0	-1.07704	0	-1.15635	0	0	0	-1.71814	0	-1.2452	0	-1.52981	0	-1.42268	0	0	0
Cmtm8	0	0	0	0	0	0	0	0	-1.23674	0	0	0	0	0	0	0	0	0	0	-1.59003	0	0	0	0
Cndp1	0	0	-1.86798	-1.92028	-4.54839	0	0	0	0	0	0	0	0	0	0	0	0	0	0	0	0	0	0	0
Cnmd	0	0	0	0	0	0	0	0	0	0	0	0	0	0	0	0	0	0	0	0	0	0	0	0
Cnnm1	0	0	0	-1.13855	0	-1.26474	-1.49267	0	-1.42974	0	-2.13799	0	-1.60174	-1.07321	0	0	0	0	0	0	0	0	-3.53197	0
Cnnm2	0	0	0	0	0	0	0	0	-1.72927	0	-1.54985	0	0	0	0	0	0	0	0	0	0	0	0	0
Cnnm3	0	0	0	0	0	0	-1.06937	0	0	0	0	0	0	0	0	0	0	0	0	0	0	0	0	0
Cnnm4	0	0	-2.2387	0	0	0	0	0	0	0	0	0	0	0	0	0	0	0	0	0	0	0	0	0
Cntd1	0	0	0	0	0	0	-1.34087	-1.63825	0	-1.25363	0	0	0	0	0	0	0	0	0	0	0	0	0	0
Cntfr	0	0	0	0	0	0	-2.86462	0	-2.03125	0	-2.79719	0	0	0	0	0	0	0	0	0	0	0	0	0
Cntn3	0	0	0	0	0	0	0	0	-1.85905	-2.28919	0	0	0	0	-2.32558	0	0	0	0	0	0	0	0	0
Cntnap2	0	0	0	-1.24435	0	0	0	0	0	0	0	0	0	-2.10391	0	0	0	0	0	0	0	0	0	0
Cobll1	0	0	0	0	0	0	0	0	0	0	0	0	-1.1316	0	0	0	0	0	0	0	0	0	0	0
Coch	0	0	0	0	0	0	0	0	0	0	0	0	0	-4.4115	0	0	0	0	0	0	0	0	0	0
Cog7	0	0	0	0	0	0	0	0	0	0	0	-1.13832	0	-1.3947	0	0	0	0	0	0	0	0	0	0
Col11a1	0	0	0	0	0	0	0	0	0	0	0	0	0	-1.72302	0	0	0	0	0	0	0	0	0	0
Col14a1	0	0	0	0	0	0	0	0	0	0	0	0	0	0	0	0	0	0	0	0	0	0	0	0
Col26a1	0	0	0	0	0	0	0	0	0	0	0	-1.08229	-3.2142	-1.21788	0	0	0	0	0	0	-6.7233	0	0	0
Col27a1	0	0	-2.53889	-3.63043	-3.66424	0	0	0	-1.78776	-1.40254	-1.77461	-1.18161	-3.26713	-2.00418	-2.04622	-1.36546	0	0	0	-2.98272	0	0	0	0
Col4a3	0	0	0	0	0	0	0	0	-1.02406	0	0	0	-1.65772	0	0	0	0	0	0	0	0	0	0	0
Col4a4	0	0	0	0	0	0	0	0	-1.2856	0	-1.21049	0	-1.42408	-1.24675	0	0	-1.41083	0	0	0	0	0	0	0
Col4a5	0	0	0	0	0	0	0	0	0	0	0	0	-1.10388	0	0	0	0	0	0	0	0	0	0	0
Colec11	0	0	0	0	0	0	0	0	0	0	0	0	0	0	0	0	0	0	0	0	-5.35552	0	0	0
Colgalt2	0	0	0	0	0	0	-1.60894	0	-1.99968	0	-2.41793	-1.4933	-3.1008	0	0	0	0	0	-2.39312	-1.69072	0	0	0	0
Coq8a	0	0	-1.58803	-1.25184	0	0	-1.57977	0	0	0	0	0	0	0	0	0	0	0	-3.77571	0	0	0	0	0
Cox5b	0	0	0	0	0	0	-1.1934	0	0	0	0	0	0	0	0	0	0	0	0	0	0	0	0	0
Cox6b1	0	0	0	0	0	0	-1.169	0	0	0	0	0	0	0	0	0	0	0	0	0	-1.23431	0	0	0
Cox6c	0	0	0	0	0	0	-1.54058	0	-1.02625	0	0	0	0	0	-1.55256	0	0	0	-1.47354	0	0	0	0	0
Cox7a2	0	0	0	0	0	0	-1.10662	0	0	0	0	0	0	0	0	0	0	0	0	0	0	0	0	0
Cpeb2	0	0	0	0	0	0	0	0	0	0	0	0	0	0	0	0	0	-1.16484	0	0	0	0	0	0
Cpeb3	0	0	-2.54737	-1.89861	0	0	-1.0864	0	0	0	-1.22132	0	-1.39088	-1.18102	-1.17497	0	-1.49091	0	0	0	0	0	0	0
Cpm	0	0	0	0	0	0	0	0	0	0	0	0	0	0	0	0	0	0	0	0	-3.81107	-2.82169	0	0
Cpne2	0	0	0	0	0	-1.44918	0	0	0	0	0	0	0	0	0	0	0	0	0	0	0	0	0	0
Cpne4	0	0	-1.6859	0	0	0	0	0	0	0	0	0	0	0	0	0	0	0	0	0	0	0	0	0
Cpsf6	0	0	0	0	0	0	0	0	0	0	0	0	0	0	0	0	0	0	0	0	0	-1.04495	0	0
Cpt1a	0	0	0	0	0	0	0	0	0	0	-1.10179	0	0	0	0	0	0	0	0	0	0	0	0	0
Cr2	0	0	0	0	0	0	0	0	0	0	0	0	0	-2.12286	0	0	0	0	0	0	0	0	0	0
Crat	0	0	0	0	0	0	-1.1408	0	0	0	-1.36012	0	0	0	0	0	0	0	0	0	0	0	0	0
Crb3	0	0	0	0	0	0	0	0	0	0	0	0	0	0	0	0	0	0	0	0	0	0	0	0
Crebrf	0	0	0	0	0	0	0	0	0	-1.26109	0	0	0	0	0	0	0	0	0	0	0	0	0	0
Crispld1	0	0	0	0	0	0	0	0	0	0	0	0	0	0	0	0	0	0	0	-2.08799	0	0	0	0
Crocc	0	0	-1.64694	0	0	0	-1.6159	0	-1.46557	-1.28342	-1.95956	-1.51345	0	0	0	0	0	0	0	0	0	0	0	0
Cry2	0	0	-1.01674	0	0	0	-1.14158	-1.05497	0	0	0	0	0	0	0	0	0	0	0	0	0	0	0	0
Cryab	0	0	0	0	0	-1.04173	0	0	0	0	0	0	0	0	0	0	0	0	0	0	0	0	0	0
Crybg1	0	0	0	0	0	0	0	0	0	0	0	-1.33432	0	-1.17322	0	0	0	0	0	0	0	0	0	0
Cryl1	0	0	-2.38412	-1.32948	0	0	0	0	0	0	0	0	0	0	0	0	0	0	0	0	0	0	0	0
Cryzl2	0	0	-1.17586	0	0	0	-1.48008	0	0	0	0	0	0	0	0	0	0	0	0	0	0	0	0	0
Csad	0	0	-1.29259	0	0	-1.07048	0	0	0	0	0	0	0	0	0	0	0	0	0	0	0	0	0	0
Csgalnact1	0	0	0	0	0	0	0	0	0	0	0	0	0	0	0	0	0	0	0	0	0	-1.28702	0	0
Csrnp3	0	0	-1.30431	0	0	0	0	0	0	0	0	0	0	0	0	0	0	0	0	0	0	0	0	0
CT010465.1	0	0	-2.50575	0	0	0	0	0	0	0	0	0	0	0	0	0	0	0	0	0	0	0	0	0
Ctdspl	0	0	0	0	0	0	0	0	0	0	0	0	0	0	0	0	-1.45547	0	0	0	0	0	0	0
Cth	0	0	-1.59602	0	0	0	0	0	0	0	0	0	0	-1.31376	0	0	0	0	0	0	0	0	0	0
Ctnna2	0	0	-4.83385	-2.3428	0	0	0	0	0	0	0	0	0	0	0	0	0	0	0	0	0	0	0	0
Ctnna3	0	0	0	0	0	0	0	0	0	0	0	0	0	0	0	0	0	0	-3.43565	-3.62677	0	0	0	0
Ctnnbip1	0	0	-1.00899	0	0	0	0	0	0	0	0	0	0	0	0	0	0	0	0	0	0	0	0	0
Ctsf	0	0	-1.06677	-1.27444	0	0	-1.11876	0	0	0	0	0	0	0	0	0	0	0	0	0	0	0	0	0
Cubn	0	0	-2.04286	0	0	0	-2.36852	0	-2.38964	0	-2.42547	0	0	0	0	0	0	0	0	0	0	0	0	0
Cux2	0	0	0	0	0	0	-1.04442	0	0	0	0	0	0	0	0	0	0	0	0	0	0	0	0	0
Cwh43	0	0	0	0	0	0	0	0	0	-1.11338	0	0	0	0	0	0	0	0	0	0	0	0	0	0
Cxcl12	0	0	-2.14665	-1.01585	0	0	0	0	0	0	0	0	0	0	0	0	0	0	0	0	0	-1.37817	0	0
Cyb5rl	0	0	0	0	0	0	0	0	0	-1.21416	0	0	0	0	0	0	0	0	0	0	0	0	0	0
Cyc1	0	0	0	0	0	0	-1.14981	0	0	0	0	0	0	0	0	0	0	0	0	0	0	0	0	0
Cyfip2	0	0	-1.88994	-1.01447	0	0	0	0	0	0	0	0	0	0	0	0	0	0	0	0	0	0	0	0
Cyp2a4	0	0	-3.82191	0	0	0	-3.56935	0	-4.4376	0	-5.11723	0	-4.66625	0	-2.76655	0	-6.11371	0	-4.69607	0	0	0	0	0
Cyp2c23	0	0	-2.85797	0	0	0	0	0	0	0	0	0	0	0	0	0	0	0	0	0	0	0	0	0
Cyp2d12	0	0	-4.60533	0	0	0	0	0	0	0	0	0	0	0	0	0	0	0	-7.38168	0	0	0	0	0
Cyp2d22	0	0	0	-1.26058	0	0	0	0	0	0	0	0	0	0	0	0	0	0	0	0	0	0	0	0
Cyp2d26	0	0	-3.6739	-2.91626	0	0	0	0	0	0	0	0	0	0	0	0	0	0	-6.54758	0	-4.72359	0	0	0
Cyp2d9	0	0	-1.06003	-1.69888	0	0	0	0	0	0	0	0	0	0	0	0	0	0	0	0	0	0	0	0
Cyp2e1	0	0	-2.69101	-3.00832	-5.87801	0	0	0	0	0	0	0	0	0	0	0	0	0	0	0	-5.0725	0	0	0
Cyp2f2	0	0	-1.32304	-1.64165	0	0	0	0	0	0	0	0	0	0	0	0	0	0	0	0	0	0	0	0
Cyp2j11	0	0	-1.98711	-1.6524	0	0	0	0	0	0	-1.60952	-1.27956	0	0	0	0	0	0	-3.66995	0	0	0	0	0
Cyp2j5	0	0	0	0	0	0	-1.38896	0	-1.34591	0	-1.49511	0	-2.04166	0	-1.88457	0	0	0	-2.02426	0	0	0	0	0
Cyp2j7	0	0	-2.2173	-1.34092	0	0	0	0	-1.7702	0	-1.28385	0	0	0	0	0	0	0	0	0	0	0	0	0
Cyp2j8	0	0	-1.18086	0	0	0	0	0	0	0	0	0	0	0	0	0	0	0	0	0	0	0	0	0
Cyp2j9	0	0	-1.05533	0	0	0	0	0	0	0	0	0	0	0	0	0	0	0	0	0	0	0	0	0
Cyp2s1	0	0	0	0	0	0	0	0	0	0	0	0	0	0	-2.37873	0	0	0	0	0	0	0	0	0
Cyp39a1	0	0	0	0	0	0	0	0	0	0	0	0	0	-1.08222	0	0	0	0	0	0	0	0	0	0
Cyp4a10	-4.40425	0	-2.36288	0	-4.25512	0	-4.13272	0	-4.10353	0	-4.74727	0	-3.57716	0	-4.41043	0	-5.48232	0	-5.90564	0	-3.52866	0	-6.25282	0
Cyp4a14	0	0	-1.06456	-4.46154	0	0	-4.38131	0	-4.54785	0	0	0	0	0	0	0	-5.46176	0	-4.20644	0	-5.79869	0	0	0
Cyp4a31	0	0	0	0	0	0	-1.17497	0	0	0	0	0	0	0	0	0	0	0	-2.36611	0	0	0	0	0
Cyp4b1	0	0	-1.23567	-2.03139	0	0	0	0	0	0	0	0	0	0	0	0	0	0	-2.01717	-1.51861	-2.28279	0	0	0
Cyp51	0	0	-3.84218	-1.39824	0	0	-2.35672	0	0	0	0	0	0	0	0	0	-2.33306	0	0	0	0	0	0	0
Cytip	0	0	0	0	0	0	0	0	-1.0121	0	0	0	0	0	0	0	0	0	0	0	0	0	0	0
D030045P18Rik	0	0	0	0	0	0	0	0	0	0	0	0	-2.10762	0	0	0	0	0	0	0	0	0	0	0
D10Jhu81e	0	0	-1.01319	0	0	0	-1.90715	0	0	0	0	0	0	0	0	0	0	0	0	0	0	0	0	0
D3Ertd751e	0	0	-1.4502	0	0	0	-1.32555	0	-2.01892	0	-1.57911	0	-2.39569	0	0	0	0	0	0	0	0	0	0	0
D430001F17Rik	0	0	0	0	0	0	0	-1.69558	0	0	0	0	0	0	0	0	0	0	0	0	0	0	0	0
D530033B14Rik	0	0	0	0	0	0	0	-1.21867	0	0	0	0	0	0	0	0	0	0	0	0	0	0	0	0
D630023F18Rik	0	0	-4.50384	-1.97556	0	0	0	0	0	0	0	0	0	0	0	0	0	0	0	0	0	0	0	0
D630024D03Rik	0	0	0	0	0	0	-1.75047	0	-2.49835	-1.4005	-1.74511	-1.17003	0	0	0	0	0	0	0	0	0	0	0	0
D630029K05Rik	0	0	-4.22567	-2.39279	0	0	0	0	0	0	0	0	0	0	0	0	0	0	-6.82898	0	-5.35645	0	0	0
D630033O11Rik	0	0	0	0	0	0	0	0	0	0	0	0	0	0	0	0	0	0	0	0	-5.01317	0	0	0
D830024N08Rik	0	0	0	0	0	0	0	0	0	0	0	0	0	-1.54067	0	0	0	0	0	0	0	0	0	0
Daam2	0	0	0	0	0	0	0	0	0	0	0	0	0	-2.44682	0	0	0	0	0	0	-2.38117	-1.96056	0	0
Dab1	0	0	0	0	0	0	0	0	0	0	0	0	0	-1.08726	0	0	0	0	0	0	0	0	0	0
Dab2	0	0	0	0	0	0	0	0	-1.29917	0	0	0	0	0	0	0	0	0	0	0	0	0	0	0
Dach1	0	0	0	0	0	0	0	0	0	0	0	0	0	-1.06648	0	0	0	0	-2.12268	0	0	0	0	0
Dapk2	0	0	0	0	0	0	0	0	0	0	0	0	0	0	0	0	0	0	0	0	0	-2.02287	0	0
Dbp	-2.91996	0	-2.39208	-1.66795	0	0	-2.88414	-1.78375	-3.04452	0	-4.97485	-2.89498	-1.75509	0	0	0	-2.34552	0	-3.1936	-2.18355	-2.14693	0	0	0
Dclk2	0	0	0	0	0	0	-1.04162	0	0	0	0	0	0	0	0	0	0	0	0	0	0	0	0	0
Dclk3	0	0	-1.33484	0	0	0	-1.37876	0	0	0	0	0	0	0	0	0	0	0	0	0	0	0	0	0
Dcxr	0	0	-1.8306	-1.23361	0	0	-1.30285	0	-2.13052	0	0	0	0	0	-2.53113	0	0	0	-2.7958	0	-3.90812	0	0	0
Ddc	0	0	0	0	-4.85475	0	0	0	0	0	0	0	-2.84429	0	0	0	0	0	0	0	0	0	0	0
Ddo	0	0	0	0	0	0	-1.1041	0	-1.10026	0	-1.20165	0	0	0	0	0	0	0	0	0	0	0	0	0
Ddx23	0	0	0	0	0	0	0	0	0	0	0	0	0	-1.28055	0	0	0	0	0	0	0	0	0	0
Ddx5	0	0	0	0	0	0	0	0	0	0	0	0	0	-1.00417	0	0	0	0	0	-1.05824	0	0	0	0
Defb1	0	0	0	0	0	0	0	0	-1.71634	-1.27743	0	0	0	0	0	0	0	0	0	0	0	0	0	0
Degs2	0	0	-1.64039	0	0	0	0	0	0	0	0	0	0	0	0	0	0	0	0	0	0	0	0	0
Dennd2c	0	0	0	0	0	0	0	0	0	0	0	0	0	0	0	0	0	0	0	0	0	0	0	0
Dennd3	0	0	-1.48506	0	0	0	0	0	0	0	0	0	0	0	0	0	0	0	0	0	0	0	0	0
Depdc1b	0	0	0	0	0	0	-1.31896	0	-1.43362	-1.4995	0	0	0	0	0	0	0	0	0	0	0	0	0	0
Dgat2	0	0	-1.6646	0	0	0	0	0	0	0	0	0	0	0	-3.06615	0	0	0	0	0	0	0	0	0
Dgka	0	0	-1.22568	0	0	0	0	0	0	0	0	0	0	0	0	0	0	0	0	0	0	0	0	0
Dgkz	0	0	0	0	0	0	0	0	0	0	-1.40019	0	0	0	0	0	0	0	0	0	0	0	0	0
Dhcr24	0	0	0	0	0	0	-1.24598	0	0	0	0	0	0	0	0	0	0	0	0	0	0	0	0	0
Dhfr	0	0	-1.09216	0	0	0	0	0	0	0	0	0	0	0	0	0	0	0	0	0	0	0	0	0
Dhrs11	0	0	0	0	0	0	-1.00759	0	-1.05721	0	0	0	0	0	0	0	0	0	0	0	0	0	0	0
Dhrs3	0	0	-1.25325	0	0	0	0	0	0	0	0	0	0	0	0	0	-1.7383	0	0	0	0	0	0	0
Dhtkd1	0	0	-2.33898	-1.8416	0	0	-1.36538	0	0	0	-2.05081	0	0	0	0	0	0	0	0	0	0	0	0	0
Dhx34	0	0	0	0	0	0	0	-1.19545	0	0	0	0	0	0	0	0	0	0	0	0	0	0	0	0
Dio1	0	0	-2.46876	0	0	0	0	0	0	0	0	0	0	0	0	0	0	0	0	0	0	0	0	0
Disc1	0	0	0	0	0	0	0	-1.23446	0	0	0	0	0	0	0	0	0	0	0	0	0	0	0	0
Dixdc1	0	0	-2.03223	-1.03201	0	0	0	0	0	0	0	0	0	0	0	-1.52253	0	0	0	0	0	0	-2.87056	0
Dkk2	0	0	0	0	0	0	0	0	0	0	0	0	0	0	0	0	0	0	-2.70896	-1.93565	-2.99101	-1.74685	0	0
Dlc1	0	0	0	0	0	0	0	0	0	0	0	0	0	0	0	0	0	0	-1.74074	-1.31153	0	0	0	0
Dlg2	0	0	-3.06158	-1.90025	0	0	0	0	0	0	0	0	0	0	0	0	0	0	0	0	0	0	0	0
Dlg3	0	0	0	0	0	0	0	0	-1.28963	0	0	0	0	0	0	0	0	0	0	0	0	0	0	0
Dmgdh	0	0	-2.32126	-1.29398	-5.3368	0	0	0	0	0	0	0	0	0	0	0	0	0	0	0	0	0	0	0
Dmrt2	0	0	0	0	0	0	0	0	0	0	0	0	0	0	0	-1.00379	0	0	0	0	0	0	0	0
Dmtn	0	0	0	0	0	0	-1.01186	0	-1.10112	0	0	0	0	0	0	0	0	0	0	0	0	0	0	0
Dnah11	0	0	0	0	-4.20716	-2.25692	-2.44203	-1.71836	-2.58162	-1.34523	0	0	0	0	0	0	0	0	0	0	0	0	0	0
Dnajc12	0	0	-1.49269	0	0	0	0	0	0	0	0	0	0	0	0	0	0	0	0	0	0	0	0	0
Dnajc19	0	0	-1.2352	0	0	0	0	0	0	0	0	0	0	0	0	0	0	0	0	0	0	0	0	0
Dnajc28	0	0	0	0	0	0	0	0	0	0	0	0	0	0	0	0	0	0	0	0	0	0	0	0
Dnajc6	0	0	-2.07606	0	0	0	-1.67694	0	-1.73285	0	0	0	0	0	0	0	0	0	0	0	0	0	0	0
Dnase1	0	0	-4.75356	-4.26528	0	-3.6238	-4.47028	-3.22928	-4.89798	-2.8219	-5.91743	-2.82143	-5.66488	-2.74537	-4.71697	-4.51177	0	0	-6.99656	-3.83956	-7.60856	-2.72981	0	0
Dnm1	0	0	0	0	0	0	0	0	0	0	0	0	0	0	0	0	0	0	0	0	0	0	0	0
Dnm3	0	0	0	0	0	-1.28569	0	0	0	0	0	0	0	-1.66157	0	0	0	0	0	0	0	0	0	0
Dnmt3a	0	0	0	0	0	0	0	0	0	0	0	0	0	0	0	0	-1.00849	0	0	0	0	0	0	0
Dock6	0	0	0	0	0	0	0	0	0	0	0	0	-1.36105	-1.29005	0	0	0	0	0	0	0	-1.30467	0	0
Dock8	0	0	0	0	0	0	-1.19396	0	0	0	-1.04689	0	0	0	0	0	0	0	0	0	0	0	0	0
Dock9	0	0	-1.21293	0	0	0	0	0	0	0	0	0	0	0	0	0	0	0	0	0	0	0	0	0
Dopey2	0	0	0	0	0	0	0	0	0	0	0	0	0	-1.46522	0	0	0	0	0	0	0	0	0	0
Dpf3	0	0	-1.06589	0	0	0	0	0	0	0	0	0	0	0	0	0	0	0	0	0	0	0	0	0
Dpp7	0	0	0	0	0	0	0	0	0	0	0	0	0	0	0	0	0	0	0	0	0	0	-4.23485	0
Dpys	0	0	-5.09032	0	0	0	0	0	0	0	0	0	0	0	0	0	0	0	0	0	0	0	0	0
Dsn1	0	0	0	0	0	0	0	0	0	0	0	0	0	0	0	0	0	0	0	0	0	0	0	0
Dst	0	0	0	0	0	0	-1.33547	0	0	0	0	0	0	0	0	0	0	0	0	0	0	0	0	0
Dtna	0	0	0	0	0	0	0	0	0	0	0	0	0	0	0	0	-1.13061	0	0	0	0	0	0	0
Dtnbos	0	0	0	0	0	-1.67957	0	0	0	0	0	0	-1.71054	-1.95079	0	0	0	0	0	0	0	0	0	0
Dusp15	0	0	0	0	0	0	-3.21001	-2.38796	-2.94628	-2.85055	0	0	0	0	0	0	0	0	0	0	0	0	0	0
Dyrk1b	0	0	0	0	0	0	0	0	0	0	0	0	0	0	0	0	0	0	0	0	0	0	-3.40906	0
Dzip1l	0	0	0	0	0	0	0	0	0	0	0	0	-1.42636	0	0	0	0	0	0	0	0	0	0	0
E530011L22Rik	0	0	0	0	0	0	0	-1.07343	0	0	0	0	0	0	0	0	0	0	0	0	0	0	0	0
Eaf2	0	0	0	0	0	0	0	0	0	0	0	0	0	-1.70877	0	0	0	0	0	0	0	0	0	0
Ebf1	0	0	0	0	0	0	0	0	0	0	0	0	-2.57319	0	0	0	0	0	0	0	0	-1.14551	0	0
Ece1	0	0	-1.94356	0	0	0	0	0	0	0	0	0	0	0	0	0	0	0	0	0	0	0	0	0
Ech1	0	0	-1.14364	0	0	0	-1.2278	0	-1.26479	0	0	0	0	0	0	0	0	0	0	0	0	0	0	0
Echdc2	0	0	0	-1.09381	0	0	0	0	0	0	0	0	0	0	0	0	0	0	0	0	0	0	0	0
Eci3	0	0	-3.40297	-1.87918	0	0	-3.53053	0	0	0	0	0	-6.48507	0	0	0	0	0	-5.29245	0	-4.43051	-3.03679	0	0
Ecm1	0	0	0	0	0	0	0	0	0	0	0	0	0	0	0	0	0	0	0	0	-1.65877	-1.48797	0	0
Edar	0	0	0	0	0	0	-2.25519	0	0	0	0	0	0	0	0	0	0	0	0	0	0	0	0	0
Ednrb	0	0	0	0	0	0	0	0	0	0	0	-2.18924	0	-2.01998	0	0	0	0	0	0	0	0	0	0
Eepd1	0	0	0	0	0	0	0	0	0	0	0	0	0	0	0	0	0	0	0	0	0	-2.65919	0	0
Efcab2	0	0	0	0	0	0	0	0	0	0	0	0	0	0	0	0	0	0	0	0	0	0	0	0
Efna1	0	0	-1.01813	-1.07915	0	0	0	0	0	0	0	0	0	0	0	0	0	0	0	0	0	0	0	0
Efnb2	0	0	0	0	0	0	0	0	0	0	0	0	0	0	0	0	0	0	0	-1.59456	0	0	0	0
Egf	0	0	-3.15563	-1.22162	0	0	-4.29629	-2.22257	-4.59964	-2.06465	-4.52766	0	-3.9776	0	-3.08114	0	-4.06823	0	-5.11464	0	-5.76389	0	0	0
Egfem1	0	0	0	0	0	0	0	0	0	0	0	0	0	-2.49744	0	0	0	0	0	0	0	0	0	0
Egfl6	0	0	0	0	0	0	-1.51877	-1.35385	0	0	0	0	0	0	0	0	0	0	0	0	0	0	0	0
Egflam	0	0	0	0	0	0	0	0	0	0	0	0	0	0	0	0	0	0	0	0	0	-1.93692	0	0
Egfros	0	0	0	0	0	0	0	0	0	0	0	0	0	-2.14454	0	0	0	0	0	0	0	0	0	0
Egln1	0	0	0	0	0	0	0	0	0	0	0	0	-1.12411	0	0	0	0	0	0	0	0	0	0	0
Egln3	0	0	0	0	0	0	0	0	0	0	0	0	0	0	0	0	0	0	0	-1.28049	0	0	0	0
Egr1	0	0	0	0	0	0	0	0	0	0	0	0	0	0	-3.27636	-3.04211	-1.54829	-1.79562	0	0	-2.60601	-1.76985	0	0
Ehd3	0	0	0	0	0	0	0	0	0	0	0	0	0	0	0	0	0	0	0	0	0	-2.30462	0	0
Ehhadh	0	0	0	-1.15901	0	0	-1.39037	0	0	0	0	0	-1.63406	0	0	0	0	0	-2.73243	0	-2.95313	0	0	0
Ei24	0	0	0	0	0	0	0	0	0	0	0	0	-1.28191	0	0	0	0	0	0	0	0	0	0	0
Eif3j1	0	0	0	0	0	0	0	0	0	0	0	0	0	0	0	0	-1.27522	0	0	0	0	0	0	0
Elf5	0	0	0	0	0	0	0	0	0	0	0	0	0	0	0	0	0	0	0	0	0	0	-6.28435	0
Elfn1	0	0	0	0	0	0	-1.20707	0	0	0	0	0	0	0	0	0	0	0	0	0	0	0	0	0
Elmo1	0	-1.51642	0	0	0	0	0	0	0	0	0	0	0	0	0	0	0	0	0	0	0	0	0	0
Elmod3	0	0	-1.42961	0	0	0	0	0	0	0	0	0	0	0	0	0	0	0	0	0	0	0	0	0
Elovl2	0	0	-1.65262	0	0	0	0	0	0	0	0	0	0	0	0	0	0	0	0	0	0	0	0	0
Emc9	0	0	0	0	0	0	0	-1.23003	0	0	0	-1.90121	0	0	0	0	0	0	0	0	0	0	0	0
Emid1	0	0	0	0	0	0	0	0	0	0	0	0	0	0	0	0	0	0	0	0	-2.98633	-3.41699	0	0
Emilin2	0	0	0	0	0	0	0	0	0	0	0	0	-2.9757	0	0	0	0	0	0	0	0	0	0	0
Eml5	0	0	0	0	0	0	0	0	0	0	0	0	0	-1.13162	0	0	0	0	0	0	0	0	0	0
Eml6	0	0	0	0	0	0	0	0	0	0	0	0	0	-1.1302	0	0	0	0	0	0	0	0	0	0
Emp2	0	0	0	0	0	0	0	0	0	0	0	0	0	0	0	0	0	0	0	0	0	-1.52629	0	0
Emx1	0	0	-1.54607	0	0	0	0	0	-1.62134	0	0	0	0	0	0	0	0	0	0	0	0	0	0	0
Endog	0	0	0	0	-3.43657	0	0	0	0	0	0	0	0	0	0	0	0	0	0	0	0	0	0	0
Endou	0	0	-1.072	0	0	0	0	0	0	0	0	0	0	0	0	0	0	0	0	0	0	0	0	0
Enpep	0	0	0	0	0	0	0	0	0	0	0	0	0	0	0	0	0	0	-2.82863	-1.73448	0	0	0	0
Enpp1	0	0	-1.25266	-1.5977	0	0	0	0	0	0	0	0	0	0	0	0	0	0	0	0	0	0	0	0
Enpp2	0	0	0	0	0	0	0	0	0	0	0	0	0	0	0	0	0	0	-1.71471	0	0	0	0	0
Enpp3	0	0	-1.51449	0	0	0	0	0	0	0	0	0	0	0	0	0	0	0	-2.5889	0	0	0	0	0
Enpp6	0	0	0	0	0	0	0	0	0	0	0	0	0	0	0	0	0	0	-2.55514	0	0	0	0	0
Entpd5	0	0	0	0	0	0	0	0	0	0	-1.26572	0	0	0	0	0	0	0	0	0	0	0	0	0
Epas1	0	0	-1.36653	0	0	0	0	0	0	0	0	0	0	0	0	0	0	0	0	0	-2.69962	-2.14489	0	0
Epb41l3	0	0	-1.63004	0	0	0	-1.65075	0	-2.62691	0	-2.08912	0	0	0	0	0	0	0	0	0	0	0	0	0
Epcam	0	0	0	0	0	0	-1.05196	0	0	0	0	0	0	0	0	0	0	0	0	0	0	0	0	0
Epha1	0	0	-1.21513	0	0	0	0	0	0	0	0	0	0	0	0	0	0	0	0	0	0	0	0	0
Epha4	0	0	0	0	0	0	0	0	0	0	0	0	0	0	0	0	0	0	0	-1.31666	0	0	0	0
Ephb1	0	-1.06534	0	0	0	0	0	0	0	0	0	0	0	0	0	0	0	0	-2.90226	0	0	0	0	0
Ephx1	0	0	0	0	0	0	0	0	0	0	0	0	0	0	0	0	0	0	-2.48625	-1.50345	0	0	-3.0642	0
Ephx2	0	0	0	0	0	0	-1.39308	0	0	0	0	0	0	0	0	0	0	0	0	0	0	0	0	0
Epor	0	0	0	0	-4.64757	0	0	0	0	0	0	0	-2.65943	-1.20099	0	0	0	0	0	0	0	0	-3.40004	0
Eps8	0	0	0	0	0	0	0	0	0	0	0	0	0	0	0	0	0	0	0	0	0	-1.92664	0	0
Eps8l1	0	0	0	0	0	-1.36019	0	0	0	0	0	0	-1.56866	-1.50446	0	0	0	0	0	0	0	0	0	0
Erc2	0	0	0	0	0	0	-1.36779	0	0	0	0	0	0	0	0	0	0	0	0	0	0	0	0	0
Erlin1	0	0	-1.23902	0	0	0	0	0	0	0	0	0	0	0	0	0	0	0	0	0	0	0	0	0
Errfi1	0	0	0	-1.04216	0	0	0	0	0	0	0	0	0	0	0	0	0	0	0	0	0	0	0	0
Esam	0	0	0	0	-2.77813	0	-1.31388	-1.39066	0	0	0	0	0	0	0	0	0	0	0	0	0	0	0	0
Esrp2	0	0	0	-1.48642	0	0	0	0	0	0	0	0	0	0	0	0	0	0	0	0	0	0	0	0
Esrra	0	0	-1.13336	0	0	0	0	0	0	0	-1.01814	0	0	0	0	0	-1.25453	0	0	0	0	0	0	0
Esrrb	0	0	0	0	0	0	0	0	-2.9908	-1.33149	-2.39699	0	0	0	0	0	0	0	0	0	0	0	0	0
Ets1	0	0	0	0	0	0	0	0	0	0	0	0	0	0	0	0	0	0	0	0	0	-1.1097	0	0
Etv5	0	0	-1.83224	-1.01911	0	0	0	0	0	0	0	0	0	0	0	0	0	0	0	0	0	0	0	0
Eva1c	0	0	-1.3923	0	0	0	0	0	0	0	0	0	0	0	0	0	0	0	0	0	0	0	0	0
Evc	0	0	-1.01494	0	0	0	0	0	0	0	0	0	0	0	0	0	0	0	0	0	0	0	0	0
Evpl	0	0	-1.55973	0	0	0	0	0	0	0	0	0	0	0	0	0	0	0	0	0	0	0	0	0
Exd1	0	0	0	0	0	0	0	0	0	0	0	0	0	-1.32205	0	0	0	0	0	0	0	0	0	0
Exoc3l2	0	0	0	0	0	0	0	0	0	0	0	0	0	0	0	0	0	0	-1.2083	0	-3.68832	0	0	0
Exph5	0	0	0	0	0	0	0	0	0	0	0	0	0	0	0	0	-1.6835	0	0	0	0	0	0	0
F13b	0	0	-2.89964	-1.98683	0	0	0	0	0	0	0	0	0	0	0	0	0	0	0	0	-5.04742	0	0	0
F5	0	0	0	0	0	0	0	0	0	0	0	0	0	0	0	0	0	0	0	0	-5.34313	0	0	0
Fa2h	0	0	0	0	0	0	-1.52435	0	0	0	0	0	0	0	0	0	0	0	0	0	0	0	0	0
Fabp3	0	0	0	0	0	0	-1.50478	0	-1.04662	0	0	0	0	0	0	0	0	0	0	0	0	0	0	0
Fads1	0	0	0	0	0	0	-1.32472	0	0	0	0	0	0	0	0	0	0	0	0	0	0	0	0	0
Fads2	0	0	-1.20554	0	0	0	0	0	0	0	0	0	0	0	0	0	0	0	0	0	0	0	0	0
Fads6	0	0	0	0	0	0	-1.72202	0	-1.96233	0	-2.03185	0	0	0	0	0	0	0	0	0	0	0	0	0
Fahd2a	0	0	0	0	0	0	0	0	0	0	0	0	-1.34947	0	0	0	0	0	0	0	0	0	0	0
Fam102a	0	0	-1.14988	0	0	0	0	0	0	0	0	0	0	0	0	0	0	0	0	0	0	0	0	0
Fam105a	0	0	0	0	0	0	0	0	0	0	0	0	0	-1.58981	0	0	0	0	0	0	0	0	0	0
Fam107a	0	0	-3.38513	-1.182	0	0	-1.8002	0	-1.86231	-1.18328	0	0	0	0	0	0	0	0	0	0	-5.41791	0	0	0
Fam107b	0	0	0	0	0	0	0	0	0	0	0	0	-1.17351	0	0	0	-1.15749	0	0	0	0	0	0	0
Fam110b	0	0	0	0	0	0	0	0	0	0	0	0	0	-1.23043	0	0	0	0	0	0	0	0	0	0
Fam117a	0	0	0	0	0	0	0	0	-1.54794	0	0	0	0	-1.32252	0	0	0	0	0	0	0	0	0	0
Fam117b	0	0	0	0	0	0	0	0	0	0	0	0	0	0	0	0	0	0	0	-1.14268	0	0	0	0
Fam120c	0	0	0	0	0	0	0	0	0	0	0	0	0	0	0	0	-1.35816	0	0	0	0	-1.83464	0	0
Fam13a	0	0	-1.3365	-1.35754	0	0	0	0	0	0	-1.54395	0	0	0	0	0	-1.30869	0	0	0	0	0	0	0
Fam13c	0	0	0	0	0	0	0	0	-1.78426	0	-2.1705	0	0	0	0	0	0	0	0	0	0	0	0	0
Fam151a	0	0	-3.23609	-1.33222	0	0	0	0	-3.28014	0	-2.67606	0	0	0	0	0	0	0	0	0	0	0	0	0
Fam155a	0	0	-2.7687	0	0	0	0	0	0	0	0	0	0	0	0	0	0	0	0	0	0	0	0	0
Fam161a	0	0	0	0	0	0	0	0	0	0	0	0	0	0	0	0	0	0	0	0	0	-1.88108	0	0
Fam174b	0	0	0	0	0	0	0	0	0	0	0	0	0	0	0	0	0	0	0	0	0	0	-2.76373	0
Fam189a2	0	0	0	0	0	0	-1.32548	0	0	0	0	0	0	0	0	0	0	0	0	0	0	0	0	0
Fam196a	0	0	0	0	0	-1.51196	0	-1.35978	0	0	0	0	0	-1.82549	0	0	0	0	0	-1.14961	0	0	0	0
Fam20a	0	0	0	0	0	0	0	0	0	0	0	0	0	0	0	0	0	0	0	-1.81429	0	0	0	0
Fam214a	0	0	-1.14614	-1.11702	0	0	0	0	0	-1.1749	0	-1.03812	0	0	0	0	0	0	0	0	0	0	0	0
Fam228a	0	0	0	0	0	0	-1.28552	0	0	0	0	0	0	0	0	0	0	0	0	0	0	0	0	0
Fam228b	0	0	-2.33392	-1.49183	0	0	-1.19195	0	0	0	0	0	0	0	0	0	0	0	0	0	0	0	0	0
Fam234a	0	0	0	0	0	0	0	0	-1.28584	0	0	0	0	-1.22018	0	0	0	0	0	0	0	0	0	0
Fam71e1	0	0	0	0	0	0	-1.01673	0	0	0	0	0	0	0	0	0	0	0	0	0	0	0	0	0
Fam81a	0	0	0	0	0	0	-1.97779	-1.05919	-1.44506	-1.08678	-2.36649	-1.42728	0	0	0	0	0	0	0	0	0	0	0	0
Fam83a	0	0	0	0	0	0	0	0	0	0	0	0	-4.49607	0	0	0	0	0	0	0	0	0	0	0
Fam98a	0	0	0	0	0	0	0	0	-1.2189	0	0	0	0	0	0	0	0	0	0	0	0	0	0	0
Fancc	0	0	0	0	0	0	0	0	0	0	0	0	0	0	0	0	0	0	0	0	0	-1.60069	0	0
Far1os	0	0	0	0	0	-1.12137	0	0	0	0	0	0	0	-1.51787	0	0	0	0	0	0	0	0	0	0
Far2	0	0	0	0	0	0	0	0	0	0	0	0	0	-1.5428	0	0	0	0	0	0	0	0	0	0
Farp2	0	0	0	0	0	0	0	0	0	0	0	0	0	-1.18053	0	0	0	0	0	0	0	0	0	0
Fbln5	0	0	0	0	0	0	0	0	0	0	0	0	0	0	0	0	0	0	0	0	-2.87148	-1.81669	0	0
Fbp1	-3.69689	0	-2.17467	-1.05282	-3.03564	0	-2.34049	0	-2.44499	0	-2.82205	0	-2.39067	0	-2.99608	0	-3.25749	0	-3.55555	0	-3.15005	0	0	0
Fbxl12	0	0	0	0	0	-1.28316	0	0	0	0	0	0	0	0	0	0	0	0	0	0	0	0	0	0
Fbxl12os	0	0	0	0	0	0	0	0	0	0	0	0	0	-2.33436	0	0	0	0	0	0	0	0	0	0
Fbxl20	0	0	0	0	0	0	0	0	0	-1.14507	0	0	0	0	0	0	0	0	0	0	0	0	0	0
Fbxl3	0	0	0	0	0	0	0	0	0	0	0	0	0	0	0	0	0	0	0	0	0	-1.11785	0	0
Fbxl7	0	0	0	0	0	0	-1.06621	0	0	0	0	0	0	0	0	0	0	0	0	0	0	-1.08879	0	0
Fbxo2	0	0	0	0	0	0	0	0	0	0	0	0	0	0	0	0	0	0	0	0	0	0	-4.81349	0
Fbxo22	0	0	0	0	0	0	0	0	0	0	0	0	-1.21449	0	0	0	0	0	0	0	0	0	0	0
Fbxo32	0	0	0	0	0	0	0	0	0	-1.54912	0	0	0	0	0	0	0	0	0	0	0	0	0	0
Fbxo40	0	0	-1.17477	0	0	0	0	0	0	0	0	0	0	0	0	0	0	0	0	0	0	0	0	0
Fbxo6	0	0	0	0	0	0	0	0	0	0	0	0	0	0	0	0	0	0	0	0	0	0	-2.64542	0
Fdft1	0	0	-1.26252	0	0	0	-1.06434	0	0	0	0	0	0	0	0	0	0	0	0	0	0	0	0	0
Fdxr	0	0	0	0	0	0	0	0	-1.4072	0	0	0	0	0	0	0	0	0	0	0	0	0	0	0
Fgf9	0	0	0	0	0	0	-2.11335	-1.29502	0	-1.37172	0	0	0	0	0	0	0	0	0	0	0	0	0	0
Fgfr2	0	0	0	0	0	0	0	0	0	0	0	0	0	-1.11704	0	-1.06107	0	0	0	0	0	0	0	0
Fgfr3	0	0	-1.34076	0	0	0	0	0	0	0	0	0	0	0	0	0	0	0	0	0	0	0	0	0
Fgfr4	0	0	0	0	0	0	-1.09855	0	0	0	0	0	0	0	0	0	0	0	0	0	0	0	0	0
Fggy	0	0	-1.17976	-1.07499	0	0	0	0	0	0	0	0	0	0	0	0	0	0	0	0	0	0	0	0
Fhit	0	0	0	0	0	0	0	0	0	0	0	0	-1.39899	-1.16396	0	0	0	0	0	0	0	-1.21715	0	0
Fhitos	0	0	0	0	0	0	0	-1.03754	0	0	0	0	0	0	0	0	0	0	0	0	0	0	0	0
Fhl2	0	0	0	0	0	0	0	0	0	0	0	0	0	0	0	0	0	0	0	0	0	-1.29316	0	0
Fhod1	0	0	0	0	0	0	0	0	0	0	0	0	0	0	0	0	0	0	0	0	0	-1.32505	0	0
Fign	0	0	0	0	0	0	0	0	-1.50962	0	0	0	-1.854	0	0	0	0	0	0	0	0	0	0	0
Filip1l	0	0	0	0	0	0	-1.2075	-1.02522	0	0	0	0	0	0	0	0	0	0	0	0	0	0	0	0
Fitm1	0	0	-2.21553	0	-6.37967	0	0	0	0	0	0	0	0	0	0	0	0	0	0	0	-5.66903	0	0	0
Fkbp11	0	0	0	0	0	0	0	0	0	0	0	0	0	0	0	0	0	0	0	0	0	0	-3.72567	0
Flvcr2	0	0	-1.885	-1.01201	-3.44616	0	-1.03117	0	0	0	0	0	0	0	0	0	0	0	0	0	0	0	0	0
Flywch2	0	0	0	0	0	0	0	0	0	0	0	0	0	0	0	0	0	0	0	0	-3.47382	0	0	0
Fmc1	0	0	0	0	0	0	-1.53507	0	0	0	0	0	0	0	0	0	0	0	0	0	0	0	-2.11833	0
Fmn2	0	0	0	0	0	0	0	0	0	0	0	0	0	-1.11211	0	0	0	0	0	0	0	0	0	0
Fmnl1	0	0	-1.61196	-1.03674	0	0	0	0	0	0	0	0	0	0	0	0	0	0	0	0	0	0	0	0
Fmo1	-2.86626	0	-2.22209	-1.03064	0	0	-3.0118	0	-2.43734	0	-2.97847	0	-3.19702	0	0	0	0	0	-3.39472	0	-2.3552	0	0	0
Fmo2	0	0	-2.15164	-1.66917	0	0	-2.33088	0	-2.19799	0	-2.88322	0	0	0	0	0	0	0	-4.02964	-1.89594	-2.18307	-2.44037	0	0
Fmo4	0	0	-1.08089	0	0	0	0	0	0	0	0	0	0	0	0	0	0	0	0	0	0	0	0	0
Fmo5	0	0	0	-1.20716	0	0	0	0	0	0	0	0	0	0	0	0	0	0	0	0	0	0	0	0
Fn3k	0	0	-2.40012	-1.76924	0	0	-1.12779	0	0	0	-2.99934	0	-1.50693	0	0	0	0	0	0	0	0	0	0	0
Fndc7	0	0	0	0	0	0	0	0	0	0	0	0	0	-1.54412	0	0	0	0	0	0	0	0	0	0
Fndc9	0	0	-1.51513	0	0	0	0	0	0	0	0	0	0	-1.77502	0	0	0	0	0	0	0	0	0	0
Fnip2	0	0	-1.74011	-1.70804	0	0	-1.38697	0	-1.58009	-1.00538	0	0	0	0	0	0	0	0	0	0	0	0	0	0
Folr1	0	0	-1.35586	0	0	0	0	0	0	0	0	0	0	0	0	0	0	0	-2.01889	0	0	0	0	0
Fosb	0	0	0	0	0	0	0	0	0	0	0	0	0	0	0	0	-4.12237	0	0	0	0	0	0	0
Fpgs	0	0	-2.26089	-1.24385	0	0	0	0	0	0	0	0	0	0	0	0	0	0	0	0	0	0	0	0
Fras1	0	0	-1.67479	0	0	0	-1.82384	0	-1.98923	0	-1.80442	0	0	0	0	-1.44442	0	0	0	0	0	0	0	0
Frem2	0	0	-2.06581	0	0	0	0	0	0	0	0	0	0	-1.56056	0	0	0	0	0	0	0	0	0	0
Frg2f1	0	0	-1.67397	0	0	0	0	0	0	0	0	0	0	0	0	0	0	0	0	0	0	0	0	0
Frmd4a	0	0	0	0	0	0	0	0	-1.37448	0	0	0	0	0	0	0	0	0	0	0	0	0	0	0
Frmpd4	0	0	0	0	0	0	0	-1.12133	0	0	-1.79753	-1.78616	-1.22111	-1.35715	0	0	0	0	0	0	0	0	0	0
Frs3	0	0	-1.62976	0	0	0	0	0	0	0	0	0	0	0	0	0	0	0	0	0	0	0	0	0
Fsd1l	0	0	0	0	0	0	0	0	0	0	0	0	0	0	0	0	0	0	0	0	0	-1.68859	0	0
Fstl3	0	0	0	0	0	0	-1.41429	0	0	0	0	0	0	0	0	0	0	0	0	0	0	0	0	0
Fut9	0	0	-1.95624	-1.14071	0	0	-2.33042	0	-2.01767	0	-3.10899	0	0	0	0	-1.36636	0	0	-3.11093	0	0	0	0	0
Fxyd2	0	0	0	0	0	-1.02187	0	0	0	0	0	0	-1.42466	0	0	0	0	0	-1.49219	0	-1.94711	0	0	0
Fxyd4	0	0	0	0	0	0	0	0	0	0	0	0	-1.37697	0	0	0	0	0	0	0	0	0	0	0
Fzd1	0	0	-1.42198	0	0	0	0	0	0	0	0	0	0	0	0	0	0	0	0	0	0	0	0	0
G6pc	0	0	-2.2857	-2.49069	0	0	-2.14406	0	0	0	-3.62452	0	0	0	0	0	0	0	-3.1043	0	0	0	0	0
Gabarapl1	0	0	0	0	0	0	0	0	-1.87315	-1.03007	0	0	0	0	0	0	0	0	0	0	0	0	0	0
Gabrb3	0	0	-1.76516	-1.25091	0	0	0	0	0	0	0	0	0	0	0	0	0	0	-3.94571	0	0	0	0	0
Gabrr2	0	0	0	0	0	0	0	-1.84005	0	0	0	0	0	0	0	0	0	0	0	0	0	0	0	0
Gal3st1	0	0	0	0	0	0	0	0	0	0	-1.00693	0	0	0	0	0	0	0	0	0	0	0	0	0
Galm	0	0	-1.31082	0	0	-1.59213	-1.3169	0	-2.25426	-1.32496	0	0	-3.14647	-1.76899	0	0	0	0	0	0	0	0	0	0
Galnt11	0	0	-1.86352	-1.13307	0	0	0	0	0	0	0	0	0	0	0	0	0	0	-2.11416	0	0	0	0	0
Galnt18	0	0	0	0	0	0	0	0	0	0	0	0	0	-1.14243	0	0	0	0	0	0	0	0	0	0
Gas1	0	0	0	0	-3.28175	0	0	0	-2.9074	0	0	0	0	0	0	0	0	0	0	0	-2.70564	0	0	0
Gas6	0	0	0	0	0	0	0	0	0	0	0	0	0	0	0	0	-1.70084	0	-1.51005	0	0	0	0	0
Gatm	-2.65583	0	-2.8394	-1.6162	0	0	-2.09636	-1.44582	-1.9123	-2.39537	-1.9632	-1.0992	-2.09316	0	-2.74286	0	0	0	-2.8648	-1.6381	-2.65142	0	0	0
Gba2	0	0	0	0	0	0	0	0	0	0	0	0	0	0	0	0	0	0	0	-2.48375	0	0	0	0
Gbe1	0	0	0	0	0	0	0	0	0	0	0	0	0	0	0	0	-1.24527	0	0	0	0	0	0	0
Gc	0	0	0	0	0	0	0	0	0	0	0	0	0	0	0	0	0	0	0	0	0	0	0	0
Gcdh	0	0	-1.73001	-1.2278	0	0	-1.16867	0	0	0	0	0	0	0	0	0	0	0	0	0	0	0	0	0
Gcgr	0	0	0	0	0	0	-1.4702	-1.19797	-1.28417	0	0	0	0	0	0	0	0	0	0	0	0	0	0	0
Gcnt1	0	0	-1.12831	0	0	0	-1.11504	0	-1.6461	0	-1.28323	0	0	0	0	0	0	0	-2.2804	0	0	0	0	0
Gcnt3	0	0	0	0	0	0	0	0	0	0	0	0	-3.032	0	0	0	0	0	0	0	0	0	0	0
Gcsh	0	0	-1.12925	0	0	0	0	0	0	0	0	0	0	0	0	0	0	0	0	0	0	0	0	0
Gdf10	0	0	0	0	0	0	0	0	0	0	0	0	0	0	0	0	0	0	0	0	-4.0472	-1.89253	0	0
Gdi1	0	0	0	0	0	0	0	0	0	-1.44621	0	0	0	0	0	0	0	0	0	0	0	0	0	0
Gga2	0	0	0	0	0	0	0	0	0	0	0	0	0	0	0	0	-1.24858	0	0	0	0	0	0	0
Ggct	0	0	-1.12317	0	0	0	0	0	0	0	0	0	0	0	0	0	0	0	0	0	0	0	0	0
Ggnbp1	0	0	-1.90739	-1.28854	0	0	-1.72103	-1.00359	-1.69326	-1.77568	-2.30364	0	0	0	0	0	0	0	0	0	0	0	0	0
Ggt1	0	0	0	0	0	0	0	0	0	0	0	0	0	0	0	0	0	0	-2.50931	0	0	0	0	0
Ggt5	0	0	0	0	0	0	0	0	0	0	0	0	0	0	0	0	0	0	0	0	0	-2.47483	0	0
Ghr	0	0	-1.45196	0	0	0	0	0	0	0	0	0	0	0	0	0	0	0	0	0	0	0	0	0
Gjb1	0	0	-1.80279	-2.19271	0	0	0	0	0	0	0	0	0	0	0	0	0	0	0	0	0	0	0	0
Gjb2	0	0	-1.54134	0	0	0	0	0	0	0	0	0	0	0	0	0	0	0	-2.54558	0	0	0	0	0
Gk	0	0	0	-1.0934	0	0	0	0	0	0	0	0	0	0	0	0	0	0	-1.45707	0	0	0	0	0
Glb1	0	0	-1.03609	0	0	0	0	0	0	0	0	0	0	0	0	0	0	0	0	0	0	0	0	0
Glb1l2	0	0	0	0	0	0	-1.31763	0	0	0	0	0	0	0	0	-1.21085	0	0	0	0	0	0	0	0
Gldc	0	0	0	-1.04154	-4.56486	0	0	0	0	0	0	0	0	0	0	0	0	0	0	0	0	0	0	0
Glod5	0	0	-1.1859	0	0	0	-1.31627	0	0	0	0	0	0	0	0	0	0	0	0	0	0	0	0	0
Glt1d1	0	0	-1.47106	-1.88835	0	0	0	0	0	0	0	0	0	0	-1.78721	0	0	0	0	0	0	0	0	0
Glt8d2	0	0	0	0	-6.16236	0	0	0	0	0	0	0	0	0	0	0	0	0	0	0	0	0	0	0
Glul	0	0	-1.53823	-1.18175	0	0	0	0	0	0	0	0	0	0	0	0	0	0	0	0	0	0	0	0
Glyat	0	0	0	0	0	0	0	0	-1.51381	0	0	0	0	0	0	0	0	0	-2.06724	0	0	0	0	0
Glycam1	0	0	0	0	0	0	-1.78188	-1.94462	0	0	0	0	0	0	0	0	0	0	0	0	0	0	0	0
Gm10031	0	0	0	0	0	0	0	0	0	0	0	0	0	0	-2.74291	0	0	0	0	0	0	0	0	0
Gm10135	0	0	0	0	0	0	0	0	0	0	0	0	0	-2.65861	0	0	0	0	0	0	0	0	0	0
Gm10138	0	0	-1.5899	0	0	0	0	0	0	0	0	0	0	-1.72419	0	0	0	0	0	0	0	0	0	0
Gm10271	0	0	-1.84685	-2.17439	0	0	0	0	0	0	0	0	0	0	0	0	0	0	0	0	0	0	0	0
Gm10501	0	0	0	0	0	0	0	-1.21745	0	0	0	0	0	0	0	0	0	0	0	0	0	0	0	0
Gm10635	0	0	0	0	0	0	-3.06466	-1.68617	0	0	0	0	0	0	0	0	0	0	0	0	0	0	0	0
Gm10658	0	0	-1.48209	-1.15278	0	0	0	0	0	0	0	0	0	0	0	0	0	0	0	0	0	0	0	0
Gm10681	0	0	-1.19234	0	0	0	0	0	0	0	0	0	0	0	0	0	0	0	0	0	0	0	0	0
Gm10785	0	0	0	0	0	0	0	0	0	0	0	0	0	-1.4539	0	0	0	0	0	0	0	-2.00401	0	0
Gm10791	0	0	0	0	0	0	0	0	0	0	0	0	0	-2.89655	0	0	0	0	0	0	0	0	0	0
Gm10800	0	0	-3.50452	0	0	0	0	0	0	0	-5.30614	0	0	0	0	0	0	0	-7.1414	-5.86934	0	-4.58544	0	0
Gm10801	-5.85508	0	-6.0836	0	-7.26624	0	0	0	0	0	-6.52771	0	0	0	0	0	-5.91838	0	-5.52189	-5.1469	0	-6.80929	0	0
Gm10804	0	0	-1.7519	-1.31253	0	0	0	0	0	0	0	0	0	0	0	0	0	0	0	0	0	0	0	0
Gm10848	0	0	0	0	0	0	0	-1.34592	0	0	0	0	0	-1.78107	0	0	0	0	0	0	0	0	0	0
Gm10974	0	0	0	0	0	0	0	0	0	0	0	0	0	-2.27228	0	0	0	0	0	0	0	0	0	0
Gm11342	0	0	0	-1.04675	0	0	0	0	0	0	0	0	0	0	0	0	0	0	0	0	0	0	0	0
Gm11536	0	0	0	0	0	-1.66392	0	0	0	0	0	0	0	-2.21056	0	-2.30192	0	0	0	0	0	0	0	0
Gm11659	0	0	0	-1.02815	0	0	0	0	0	0	0	0	0	0	0	0	0	0	0	0	0	0	0	0
Gm11713	0	0	0	0	0	0	0	-1.13086	0	0	0	0	0	0	0	0	0	0	0	0	0	0	0	0
Gm12002	0	0	0	0	0	0	0	0	0	0	0	0	0	0	0	0	0	0	-4.48871	-2.75416	0	0	0	0
Gm12022	0	0	0	0	0	0	0	0	0	0	0	0	0	0	0	0	0	0	0	0	0	-2.20812	0	0
Gm12121	0	0	0	0	0	0	0	0	0	0	0	0	0	0	0	0	-1.0127	0	0	0	0	0	0	0
Gm12145	0	0	0	0	0	0	0	0	0	0	0	0	0	-2.13943	0	0	0	0	0	0	0	0	-3.78391	0
Gm12146	0	0	0	0	0	-3.09498	0	0	0	0	0	0	0	-2.4722	0	0	0	0	0	0	0	0	0	0
Gm12153	0	0	0	0	0	0	0	0	0	0	0	0	0	0	0	0	0	0	0	0	0	-2.5076	0	0
Gm12264	0	0	0	0	0	-2.45454	0	0	0	0	0	0	0	-2.71748	0	0	0	0	0	0	0	0	0	0
Gm12326	0	0	0	0	0	0	0	-2.28393	0	0	0	0	0	0	0	0	0	0	0	0	0	0	0	0
Gm12353	0	0	0	-1.13041	0	0	0	0	0	0	0	0	0	-1.6023	0	-1.2099	0	0	0	0	0	-1.9648	0	0
Gm12394	0	0	0	0	0	0	0	0	0	0	0	0	0	0	0	0	0	0	0	0	0	-2.80773	0	0
Gm12472	0	0	0	0	0	0	0	0	0	0	0	0	0	0	0	0	0	0	0	0	0	0	0	0
Gm12576	0	0	0	0	0	0	0	0	0	0	0	0	0	-1.12883	0	0	0	0	0	0	0	0	0	0
Gm12678	0	0	-1.38278	0	0	0	0	0	0	0	0	0	0	0	0	0	0	0	0	0	0	0	0	0
Gm12925	0	0	0	0	0	0	0	0	0	0	0	0	0	-2.97097	0	0	0	0	0	0	0	0	0	0
Gm12962	0	0	-2.68094	-1.87954	0	0	0	0	0	0	0	0	0	0	0	0	0	0	0	0	0	0	0	0
Gm13052	0	0	0	0	0	0	-1.7151	0	-2.02699	-1.03959	0	0	0	0	0	0	0	0	0	0	0	0	0	0
Gm13111	0	0	0	0	0	0	-1.55422	0	0	0	0	0	-2.50689	0	0	0	0	0	0	0	0	0	0	0
Gm13262	0	0	0	0	0	0	0	0	-1.954	0	0	-1.57907	0	-2.15716	0	0	0	0	0	0	0	0	0	0
Gm13269	0	0	0	0	0	0	0	0	0	0	0	0	0	-1.53473	0	-1.24216	0	0	0	0	0	0	0	0
Gm13412	0	0	-3.77973	-3.71991	0	0	0	0	0	0	0	0	0	0	0	0	0	0	0	0	0	0	0	0
Gm13470	0	0	0	0	0	0	0	0	0	0	0	0	0	0	0	0	0	0	0	0	0	-2.55065	0	0
Gm13546	0	0	0	0	0	0	0	-1.97048	0	0	0	0	0	0	0	0	0	0	0	0	0	0	0	0
Gm13561	0	0	0	-1.27997	0	0	0	0	0	0	0	0	0	0	0	0	0	0	0	0	0	0	0	0
Gm13652	0	0	0	0	0	0	0	0	0	0	0	0	0	-1.05973	0	0	0	0	0	0	0	0	0	0
Gm13844	0	0	0	0	0	0	-1.09683	-1.33148	0	0	0	0	0	0	0	0	0	0	0	0	0	0	0	0
Gm13856	0	0	0	-1.15306	0	0	0	0	0	0	0	0	0	-2.88944	0	0	0	0	0	0	0	0	0	0
Gm14002	0	0	0	0	0	0	0	-1.60841	0	0	0	0	0	0	0	0	0	0	0	0	0	0	0	0
Gm14211	0	0	0	0	0	0	0	0	0	0	0	0	0	-2.04615	0	0	0	0	0	0	0	0	0	0
Gm14320	0	0	-1.99728	-1.51624	-3.02841	0	0	0	0	0	0	0	0	0	0	0	0	0	0	0	0	0	0	0
Gm14403	0	0	0	0	0	0	0	0	0	0	0	0	-3.32937	0	0	0	0	0	0	0	0	0	0	0
Gm14410	0	0	0	0	0	0	0	0	0	0	0	0	0	-1.26607	0	0	0	0	0	0	0	0	0	0
Gm14437	0	0	0	-2.26914	0	0	0	0	0	0	0	0	0	0	0	0	0	0	0	0	0	0	0	0
Gm14532	0	0	0	0	0	0	-1.66272	-1.17145	0	0	0	0	-2.8393	-2.0361	0	0	0	0	0	0	0	0	0	0
Gm14546	0	0	0	0	0	-2.27142	0	0	0	0	0	0	0	0	0	0	0	0	0	0	0	0	0	0
Gm14764	0	0	0	-2.36265	0	0	0	0	0	0	0	0	0	0	0	0	0	0	0	0	0	0	0	0
Gm14812	0	0	0	0	0	0	0	0	0	0	0	0	0	0	0	0	0	0	0	0	0	-5.23307	0	0
Gm14964	0	0	0	0	0	0	0	0	0	0	0	0	0	0	0	0	0	0	0	0	0	-2.60535	0	0
Gm15217	0	0	-1.42491	0	0	0	0	0	0	0	0	0	0	0	0	0	0	0	0	0	0	0	0	0
Gm15261	0	0	0	-1.20184	0	-1.97367	0	-1.10846	0	0	0	0	0	-1.99721	0	-1.54095	0	0	0	0	0	0	0	0
Gm15283	0	0	0	0	0	0	0	0	0	0	0	0	0	-1.1396	0	0	0	0	0	0	0	0	0	0
Gm15298	0	0	0	-3.04089	0	0	0	0	0	0	0	0	0	0	0	0	0	0	0	0	0	0	0	0
Gm15318	0	0	-3.03333	-1.26489	0	0	0	0	0	0	0	0	0	0	0	0	0	0	0	0	0	0	0	0
Gm15343	0	0	-1.02822	0	0	0	0	0	0	0	0	0	0	0	0	0	0	0	0	0	0	0	0	0
Gm15347	0	0	0	0	0	-2.49424	0	0	0	0	0	0	0	-1.02824	0	0	0	0	0	0	0	0	0	0
Gm15396	0	0	0	-1.07233	0	0	0	0	0	0	0	0	0	0	0	0	0	0	0	0	0	0	0	0
Gm15446	0	0	0	0	0	0	0	0	0	0	0	0	0	-1.16663	0	0	0	0	0	0	0	0	0	0
Gm15510	0	0	0	0	0	0	0	0	0	0	0	0	-2.74012	0	0	0	0	0	0	0	0	0	0	0
Gm15563	0	0	0	0	0	0	0	0	0	0	0	0	0	-1.3288	0	-1.76094	0	0	0	0	0	0	0	0
Gm15564	-1.94933	0	0	0	0	0	0	0	0	0	0	0	0	0	0	0	0	0	0	0	0	0	0	0
Gm15581	0	0	0	0	0	0	0	0	0	0	0	-1.39233	0	-2.04009	0	0	0	0	0	0	0	0	0	0
Gm15601	0	0	0	0	0	0	0	0	0	0	0	0	0	-1.93886	0	0	0	0	0	0	0	0	0	0
Gm15614	0	0	0	0	0	0	0	0	0	0	0	0	0	-1.55403	0	0	0	0	0	0	0	0	0	0
Gm15619	0	0	0	0	0	0	0	0	0	0	0	0	0	0	0	0	0	0	0	0	0	0	0	0
Gm15638	0	0	0	0	0	0	0	-1.52877	0	0	0	0	-2.91677	0	0	0	0	0	0	0	0	0	0	0
Gm15640	0	0	0	0	0	-2.28549	0	-1.65715	0	0	0	0	0	-4.20708	0	-2.63904	0	0	0	0	0	0	0	0
Gm15738	0	0	0	0	0	-1.30657	0	0	0	0	0	0	0	0	0	0	0	0	0	0	0	0	0	0
Gm15810	0	0	0	0	0	0	0	0	0	0	0	-1.04232	0	-1.42434	0	0	0	0	0	0	0	0	0	0
Gm15848	0	0	0	0	0	0	0	0	-2.84887	-1.60538	0	0	0	0	0	0	0	0	0	0	0	0	0	0
Gm15879	0	0	-1.00142	0	0	0	0	0	0	0	0	0	0	0	0	0	0	0	0	0	0	0	0	0
Gm15883	0	0	-2.11298	-2.04407	0	0	0	0	0	0	0	0	0	0	0	0	0	0	0	0	0	0	0	0
Gm15886	0	0	0	0	0	0	0	0	0	0	0	0	0	-1.8177	0	0	0	0	0	0	0	0	0	0
Gm15962	0	0	0	-2.24385	0	0	0	0	0	0	0	0	0	0	0	0	0	0	0	0	0	0	0	0
Gm16000	0	0	0	0	0	0	0	-2.06831	0	0	0	0	0	0	0	0	0	0	0	0	0	0	0	0
Gm16004	0	0	-5.06949	0	0	0	0	0	0	0	0	0	0	0	0	0	0	0	0	0	0	0	0	0
Gm16010	-6.17977	0	-2.59061	0	0	0	0	0	-3.67042	-2.4627	-1.57549	0	0	0	0	0	0	0	0	0	0	0	0	0
Gm16035	0	0	0	0	0	0	0	0	-2.11556	0	0	0	0	-2.10328	0	0	0	0	0	0	0	0	0	0
Gm16070	0	0	0	0	0	0	0	0	0	0	0	0	0	0	0	0	0	0	0	-2.89295	0	0	0	0
Gm16093	0	0	0	0	0	0	0	0	0	0	0	0	0	-1.44711	0	0	0	0	0	0	0	0	0	0
Gm16157	0	0	-3.21273	0	0	0	0	0	0	0	0	0	0	0	0	0	0	0	0	0	0	0	0	0
Gm16170	0	0	0	-1.5819	0	0	0	0	0	0	0	0	0	0	0	0	0	0	0	0	0	0	0	0
Gm16183	0	0	0	0	0	0	0	0	0	0	0	0	0	0	0	0	0	0	0	0	0	-4.45732	0	0
Gm16279	0	0	0	0	0	0	0	0	0	0	0	0	0	-1.11502	0	0	0	0	0	0	0	0	0	0
Gm16365	0	0	0	0	0	0	0	0	0	0	0	0	0	-1.57101	0	0	0	0	0	0	0	0	0	0
Gm16499	0	0	0	0	0	0	0	0	0	0	0	0	-5.26646	0	0	0	0	0	0	0	0	0	0	0
Gm16564	0	0	0	0	0	0	0	0	0	0	0	0	0	-2.17253	0	0	0	0	0	0	0	0	0	0
Gm16599	0	0	0	0	0	0	0	0	0	0	0	0	0	-1.58418	0	0	0	0	0	0	0	0	0	0
Gm16618	0	0	0	0	-3.82361	0	0	0	0	0	0	0	0	0	0	0	0	0	0	0	0	0	0	0
Gm17029	0	0	0	0	0	0	-1.15343	0	0	0	-2.33125	0	0	0	0	0	0	0	0	0	0	0	0	0
Gm17227	0	0	0	0	0	0	0	0	0	0	0	0	0	-1.81957	0	0	0	0	0	0	0	0	0	0
Gm17276	0	0	-2.89104	-1.35304	0	0	0	-1.08167	0	0	0	0	-1.27799	0	-2.00764	0	-2.24292	0	0	0	0	-2.36465	0	0
Gm17359	0	0	0	0	0	0	0	-1.3622	0	0	0	0	0	0	0	0	0	0	0	0	0	0	0	0
Gm17767	0	0	0	0	0	0	0	0	-1.55685	0	0	0	0	0	0	0	0	0	0	0	0	0	0	0
Gm19461	0	0	-1.24476	-1.36012	0	0	-1.64044	-1.49374	0	0	0	0	0	0	0	0	0	0	0	0	0	0	0	0
Gm19705	0	0	0	0	0	-2.54075	0	0	0	0	0	0	0	0	0	0	0	0	0	0	0	0	0	0
Gm19710	0	0	0	0	0	0	0	0	0	0	0	0	0	-1.76156	0	0	0	0	0	0	0	0	0	0
Gm19950	0	0	0	-1.20444	0	0	0	0	0	0	0	0	0	0	0	0	0	0	0	0	0	0	0	0
Gm19951	0	0	-1.41739	0	0	0	0	0	0	0	0	0	0	0	0	0	0	0	-2.79291	0	0	0	0	0
Gm20275	0	0	0	0	0	0	0	0	0	0	0	0	0	-1.62437	0	0	0	0	0	0	0	0	0	0
Gm20395	0	0	0	0	0	-1.07193	0	0	0	0	0	0	0	-1.86519	0	0	0	0	0	0	0	0	0	0
Gm20404	0	0	0	0	0	0	0	0	0	0	0	0	0	-2.09827	0	0	0	0	0	0	0	0	0	0
Gm20721	0	0	0	0	0	0	0	-1.30176	0	0	0	0	0	0	0	0	0	0	0	0	0	0	0	0
Gm20732	0	0	0	0	0	0	0	0	0	0	0	0	-1.32656	-1.0405	0	0	0	0	0	0	0	0	0	0
Gm21057	0	0	0	-1.67557	0	0	0	0	0	0	0	0	0	0	0	0	0	0	0	0	0	0	0	0
Gm2115	0	0	0	0	0	0	0	-2.60685	-6.06627	-2.29658	0	0	0	0	0	0	0	0	0	0	0	0	0	0
Gm2163	0	0	0	0	0	0	0	0	0	0	0	0	0	0	0	0	0	0	0	0	0	-2.16003	0	0
Gm26518	0	0	0	0	0	0	0	0	0	0	0	0	0	-1.29907	0	0	0	0	0	0	0	0	0	0
Gm26532	0	0	0	0	0	0	0	0	0	0	0	0	0	-1.16424	0	0	0	0	0	0	0	0	0	0
Gm26561	0	0	0	0	0	0	0	0	0	0	0	0	0	-1.05285	0	0	0	0	0	0	0	0	0	0
Gm26573	0	0	0	0	0	0	0	0	0	0	0	0	0	-1.3755	0	0	0	0	0	0	0	0	0	0
Gm26606	0	0	0	0	0	0	-1.06844	0	0	0	0	0	0	0	0	0	0	0	0	0	0	0	0	0
Gm26613	0	0	0	0	0	0	0	-1.17961	0	0	0	0	0	-2.06826	0	0	0	0	0	0	0	0	0	0
Gm26620	0	0	0	0	0	0	0	0	0	0	0	0	0	0	0	0	0	0	0	0	-5.1877	0	0	0
Gm26668	0	0	0	0	0	0	0	0	0	0	0	0	0	-1.52745	0	0	0	0	0	0	0	0	0	0
Gm26669	0	0	0	0	0	-1.85385	0	0	0	0	0	0	0	0	0	0	0	0	0	0	0	0	0	0
Gm26685	0	0	0	0	0	0	0	0	0	0	-2.536	0	0	0	0	0	0	0	0	0	0	0	0	0
Gm26691	0	0	0	0	0	0	0	0	0	0	0	0	0	0	0	0	0	0	0	0	-5.06195	0	0	0
Gm26693	0	0	0	0	0	0	0	0	0	0	0	0	0	-2.58175	0	0	0	0	0	0	0	0	0	0
Gm26699	0	0	0	0	0	0	0	0	0	0	0	0	0	-1.4383	0	0	0	0	0	0	0	0	0	0
Gm26733	0	0	0	0	0	0	0	0	0	0	0	0	0	-1.38313	0	-1.00664	0	0	0	0	0	0	0	0
Gm26749	0	0	0	0	0	0	0	0	0	0	0	0	0	-1.70511	0	0	0	0	0	0	0	0	0	0
Gm26776	0	0	0	0	0	-3.55055	0	-2.39216	0	0	0	0	0	0	0	0	0	0	0	0	0	0	0	0
Gm26782	0	0	0	0	0	0	-1.03268	0	0	0	0	0	0	0	0	0	0	0	0	0	0	0	0	0
Gm26804	0	0	0	0	0	-1.18002	0	-1.11702	0	0	0	0	0	-1.86767	0	-1.11846	0	0	0	-1.15529	0	-1.24934	0	0
Gm26816	0	0	0	0	0	0	0	-1.01673	0	0	0	0	0	0	0	0	0	0	0	0	0	0	0	0
Gm26835	0	0	0	0	0	0	0	0	0	0	0	0	0	-1.36156	0	0	0	0	0	0	0	0	0	0
Gm26836	0	0	0	0	0	0	0	0	0	0	0	0	0	-1.10454	0	0	0	0	0	0	0	0	0	0
Gm26837	0	0	0	0	0	0	0	0	0	0	0	0	0	-2.84092	0	0	0	0	0	0	0	0	0	0
Gm26854	0	0	0	-1.27383	0	0	0	0	0	0	0	0	0	0	0	0	0	0	0	0	0	0	0	0
Gm26869	0	0	0	0	0	0	0	0	0	0	0	0	0	-3.73655	0	0	0	0	0	0	0	0	0	0
Gm26870	-5.89707	-5.35259	-5.45293	-4.91291	-6.53279	-4.86331	-3.5117	-4.38661	-4.91207	-5.66865	-4.60782	-5.40821	-6.0802	-5.0526	-2.91062	-4.67805	-5.46343	-3.65219	-5.48785	-6.22245	-6.09814	-6.70112	0	0
Gm26883	0	0	0	0	0	0	0	0	0	0	0	0	0	0	0	0	0	0	0	0	0	-1.42971	0	0
Gm26892	0	0	0	0	0	0	0	-1.48414	0	0	0	0	0	0	0	0	0	0	0	0	0	0	0	0
Gm26910	0	0	0	0	0	0	0	0	0	0	0	0	0	0	0	0	0	0	0	0	0	0	0	0
Gm26936	0	0	0	0	0	0	0	0	0	0	0	0	0	-3.4492	0	0	0	0	0	0	0	-2.02287	0	0
Gm27201	0	0	0	0	0	0	-1.49151	0	0	0	0	0	0	0	0	0	0	0	0	0	0	0	0	0
Gm27216	0	0	-1.11992	0	0	0	0	0	0	0	0	0	0	0	0	0	0	0	0	0	0	0	0	0
Gm27239	0	0	0	0	0	0	0	0	0	0	-2.69023	0	0	0	0	0	0	0	0	0	0	0	0	0
Gm28048	0	0	0	0	0	0	0	-1.23209	0	0	0	0	0	0	0	0	0	0	0	0	0	0	0	0
Gm28154	0	0	0	0	0	0	0	0	0	0	0	0	0	0	0	0	0	0	0	0	0	-2.56494	0	0
Gm28258	0	0	0	0	0	0	0	0	0	0	0	0	0	0	0	0	0	0	0	0	0	-1.11567	0	0
Gm28379	0	0	0	0	0	-2.65949	0	-1.08822	0	0	0	0	0	-2.05838	0	0	0	0	0	0	0	0	0	0
Gm28410	0	0	0	0	0	0	0	-1.86155	0	0	0	0	0	-2.29692	0	-2.36636	0	0	0	0	0	0	0	0
Gm28807	0	0	-2.62261	0	0	0	0	0	0	0	0	0	0	0	0	0	0	0	0	0	0	0	0	0
Gm29012	0	0	-7.29365	-5.00128	0	0	0	0	0	0	0	0	0	0	0	0	0	0	0	0	0	0	0	0
Gm29266	0	0	0	0	0	0	-3.36119	-2.15022	0	0	0	0	0	0	0	0	0	0	0	0	0	0	0	0
Gm29536	0	0	-1.14959	0	0	0	0	0	0	0	0	0	0	0	0	0	0	0	0	0	0	0	0	0
Gm29571	0	0	-1.40627	0	0	0	0	0	0	0	0	0	0	0	0	0	0	0	0	0	0	0	0	0
Gm29642	0	0	0	0	0	0	0	0	0	0	0	0	0	-2.11571	0	0	0	0	0	0	0	0	0	0
Gm29682	0	0	0	0	0	0	0	0	0	0	0	0	0	-1.51097	0	0	0	0	0	0	0	0	0	0
Gm29683	0	0	0	0	0	0	0	0	0	0	0	0	0	0	0	0	0	0	0	0	0	-2.08699	0	0
Gm2a	0	0	-1.22065	0	0	0	0	0	0	0	0	0	0	0	0	0	0	0	-1.89715	0	0	0	0	0
Gm30097	0	0	-2.22791	-1.10118	0	0	0	0	0	0	0	0	0	0	0	0	0	0	0	0	0	0	0	0
Gm30524	0	0	0	0	0	0	0	0	0	0	0	0	0	0	0	0	0	0	0	0	-3.89085	-3.26422	0	0
Gm31045	0	0	0	0	0	0	0	0	-2.2001	0	-2.87168	0	0	0	0	0	0	0	0	0	0	0	0	0
Gm31224	0	0	0	0	0	-1.39268	0	-1.33414	0	0	0	0	0	-2.2374	0	0	0	0	0	0	0	0	0	0
Gm31458	0	0	0	-1.58623	0	0	0	0	0	0	0	0	0	0	0	0	0	0	0	0	0	0	0	0
Gm31600	0	0	-3.63964	-3.60496	0	0	0	0	0	0	0	0	0	0	0	0	0	0	0	0	0	0	0	0
Gm31718	0	0	-2.19267	-1.76625	0	0	0	0	0	0	0	0	0	0	0	0	0	0	0	0	0	0	0	0
Gm31763	0	0	0	0	0	-1.07579	0	-1.04542	0	0	0	0	0	0	0	0	0	0	0	-1.17357	0	0	0	0
Gm31793	0	0	0	0	0	0	-1.29154	0	0	0	0	0	0	0	0	0	0	0	0	0	0	0	0	0
Gm32063	0	0	-1.22971	0	0	0	0	0	0	0	0	0	0	0	0	0	0	0	0	0	0	0	0	0
Gm32569	0	0	-2.04451	-1.4828	0	0	0	0	-1.39751	-1.11737	-1.8793	-1.0373	0	-1.94662	0	0	0	0	0	0	0	0	0	0
Gm32647	0	0	0	0	0	0	0	0	0	-1.53732	0	0	0	-3.32232	0	0	0	0	0	0	0	0	0	0
Gm33023	0	0	0	0	0	0	-1.70628	-1.43126	0	0	0	0	0	0	0	0	0	0	0	0	0	0	0	0
Gm33543	0	0	0	0	0	0	-3.08027	-2.38584	-2.68902	0	-3.82559	0	0	0	0	0	0	0	0	0	0	0	0	0
Gm34240	0	0	0	0	0	0	0	0	0	0	0	0	0	0	-4.9286	0	0	0	0	0	0	0	0	0
Gm3435	0	0	0	0	0	0	0	0	0	0	0	0	0	0	0	0	0	0	0	0	-4.50971	0	0	0
Gm34590	0	0	-1.95263	0	0	0	0	0	0	0	0	0	0	0	0	0	0	0	0	0	0	0	0	0
Gm34777	0	0	-1.55004	0	0	0	0	0	0	0	0	0	0	0	0	0	0	0	0	0	0	0	0	0
Gm34868	0	0	0	-1.4517	0	0	0	-1.20251	0	0	0	0	0	0	0	0	0	0	0	0	0	0	0	0
Gm34934	0	0	0	0	0	0	0	0	0	0	0	0	0	0	0	0	0	0	0	0	0	0	0	0
Gm35164	0	0	0	0	0	0	0	0	0	0	0	0	-3.67337	-3.90028	0	0	0	0	0	0	0	0	0	0
Gm35188	0	0	0	0	0	0	0	0	0	0	0	0	0	-1.55101	0	0	0	0	0	0	0	0	0	0
Gm36011	0	0	-2.63061	0	-5.87801	0	0	0	0	0	0	0	0	0	0	0	0	0	0	0	0	0	0	0
Gm36231	0	0	-1.95884	0	0	0	0	0	0	0	0	0	0	0	0	0	0	0	0	0	0	0	0	0
Gm36388	0	0	0	0	0	0	0	-1.30011	0	0	0	-1.44087	0	0	0	-1.65982	0	0	0	0	0	0	0	0
Gm36975	0	0	0	-1.01482	0	0	0	-1.38275	0	0	0	0	0	-1.3423	0	-1.95009	0	0	0	0	0	0	0	0
Gm3716	0	0	-2.09694	0	0	0	0	0	0	0	0	0	0	0	0	0	0	0	0	0	0	0	0	0
Gm37245	0	0	-1.84038	-1.27271	0	0	0	0	0	0	-3.47086	0	-4.30386	0	0	0	0	0	0	0	0	0	0	0
Gm37381	0	0	0	0	0	0	0	0	0	0	0	0	0	0	0	0	-2.37848	0	0	0	0	0	0	0
Gm37494	0	0	0	0	0	0	0	0	0	0	0	0	0	-1.17358	0	0	0	0	0	0	0	0	0	0
Gm37768	0	0	0	0	0	0	0	0	0	0	0	0	0	-1.75247	0	0	0	0	0	0	0	0	0	0
Gm37988	0	0	-1.37447	0	0	0	0	0	0	0	0	0	0	0	0	0	0	0	0	0	0	0	0	0
Gm38102	0	0	0	0	0	-2.02088	0	0	0	0	0	0	0	-3.01315	0	0	0	0	0	0	0	0	0	0
Gm38304	0	0	0	0	0	-2.32386	0	0	0	0	0	0	0	-3.14943	0	0	0	0	0	0	0	0	0	0
Gm38604	0	0	0	0	0	0	0	0	0	0	0	0	0	-1.99352	0	0	0	0	0	0	0	0	0	0
Gm39033	0	0	-4.23851	0	-7.72115	0	0	0	0	0	0	0	0	0	0	0	0	0	0	0	0	0	0	0
Gm39075	0	0	0	0	0	0	0	0	0	0	0	0	-3.72757	0	0	0	0	0	0	0	0	0	0	0
Gm39214	0	0	0	0	0	0	0	-1.07159	0	0	0	0	0	-2.11817	0	0	0	0	0	0	0	0	0	0
Gm40123	0	0	-1.57522	-1.47164	0	0	0	0	0	0	0	0	0	0	0	0	0	0	0	0	0	0	0	0
Gm41031	0	0	-2.92961	-2.28764	0	0	0	0	0	0	0	0	0	0	0	0	0	0	0	0	0	0	0	0
Gm4221	0	0	0	0	0	0	-1.48941	0	0	0	0	0	0	0	0	0	0	0	0	0	0	0	0	0
Gm42397	0	0	-3.36464	-1.12898	0	0	-3.13159	-1.77952	0	0	-4.05245	0	0	0	-4.45509	0	0	0	-3.64893	0	0	0	0	0
Gm42418	-1.98619	0	-1.03938	0	0	0	-1.05062	0	-1.14986	0	-1.03745	0	0	0	-1.29325	0	-1.14576	0	-1.71784	0	-1.45428	0	0	0
Gm42620	0	0	0	0	0	0	0	0	0	0	0	0	0	-1.90301	0	0	0	0	0	0	0	0	0	0
Gm42650	0	0	0	0	0	0	-2.56535	-2.90735	0	0	0	0	0	0	0	0	0	0	0	0	0	0	0	0
Gm42669	0	0	0	0	0	0	0	0	0	0	0	0	0	-1.97466	0	0	0	0	0	0	0	0	0	0
Gm42697	0	0	0	0	0	0	-2.77855	-2.87686	-1.74607	-1.80033	0	0	0	0	0	0	0	0	0	0	0	0	0	0
Gm42889	0	0	0	0	0	0	-1.75745	0	0	0	0	0	-2.92496	-2.37535	0	0	0	0	0	0	0	0	0	0
Gm42906	0	0	0	0	0	0	0	0	0	0	0	0	-5.77363	0	0	0	0	0	0	0	0	0	0	0
Gm42962	0	0	0	0	0	0	-3.12304	-1.46839	0	-1.9451	0	0	0	0	0	0	0	0	0	0	0	0	0	0
Gm43376	0	0	0	0	0	0	0	0	0	0	0	0	0	-1.60744	0	0	0	0	0	0	0	0	0	0
Gm43507	0	0	0	0	0	0	0	0	0	0	0	0	0	0	0	0	0	0	0	0	0	-2.04897	0	0
Gm43713	0	0	0	0	0	0	0	0	0	0	0	0	0	-1.10798	0	0	0	0	0	0	0	0	0	0
Gm43915	0	0	0	0	0	0	0	-1.11005	0	0	0	0	0	-2.107	0	0	0	0	0	0	0	0	0	0
Gm43948	0	0	-1.10071	0	0	0	0	0	0	0	0	0	0	0	0	0	0	0	0	0	0	0	0	0
Gm4419	0	0	0	0	0	0	0	0	0	0	0	0	0	0	0	0	0	0	0	0	0	0	0	0
Gm44386	0	0	-1.98351	0	0	0	-2.00336	0	-1.60251	0	-1.83255	0	0	0	0	0	0	0	0	0	0	0	0	0
Gm4450	0	0	-1.78628	-1.20167	0	0	0	0	0	0	0	0	0	0	0	0	0	0	-3.08776	0	0	0	0	0
Gm44511	0	0	0	0	0	-1.01279	0	0	0	0	0	0	0	-1.57167	0	0	0	0	0	0	0	0	0	0
Gm44588	0	0	0	0	0	0	0	-1.65083	0	0	0	0	0	0	0	0	0	0	0	0	0	0	0	0
Gm45025	0	0	0	0	0	0	0	0	0	0	0	0	0	-2.075	0	0	0	0	0	0	0	0	0	0
Gm45051	0	0	-1.72234	-1.75926	0	0	0	0	0	0	0	0	0	0	0	0	0	0	0	0	0	0	0	0
Gm45083	0	0	-2.06574	-1.02814	0	0	0	0	0	0	0	0	0	0	0	0	0	0	0	0	0	0	0	0
Gm4524	0	0	0	-2.69222	0	0	0	-2.15611	0	0	0	0	0	-3.07788	0	0	0	0	0	0	0	0	0	0
Gm45645	0	0	-1.77693	-1.00833	0	0	0	0	0	0	0	0	0	0	0	0	0	0	0	0	0	0	0	0
Gm45650	0	0	0	0	0	0	0	-2.57481	0	0	0	0	0	0	0	0	0	0	0	0	0	0	0	0
Gm45740	0	0	0	0	0	0	0	0	0	0	0	0	0	0	0	0	0	0	0	0	0	0	0	0
Gm45846	0	0	0	0	0	0	-1.82102	-1.34088	-1.48616	0	0	0	0	0	0	0	0	0	0	0	0	0	0	0
Gm4593	0	0	0	0	0	0	0	0	-1.82276	-1.53944	0	0	0	0	0	0	0	0	0	0	0	0	0	0
Gm46102	0	0	0	0	0	0	-1.31279	0	0	0	0	0	0	0	0	0	0	0	0	0	0	0	0	0
Gm46124	0	0	0	0	0	0	0	-1.96599	0	0	0	0	0	0	0	0	0	0	0	0	0	0	0	0
Gm47167	0	0	0	0	0	-1.30024	0	0	0	0	0	0	0	-2.27286	0	-1.89527	0	0	0	0	0	0	0	0
Gm47320	0	0	0	-1.78877	0	0	0	0	0	0	0	0	0	0	0	0	0	0	0	0	0	0	0	0
Gm47350	0	0	0	0	0	-2.91733	0	0	0	0	0	0	0	-2.20646	0	0	0	0	0	0	0	0	0	0
Gm47438	0	0	0	0	0	0	-1.57748	0	0	0	0	0	-3.6787	0	0	0	0	0	0	0	0	0	0	0
Gm47469	0	0	0	0	0	0	0	0	0	0	0	0	0	-1.71268	0	0	0	0	0	0	0	-2.08704	0	0
Gm47708	0	0	0	0	0	0	-4.05184	-1.93668	-3.86156	0	-2.43388	-1.85366	0	0	0	0	0	0	0	0	-5.28515	0	0	0
Gm47719	0	0	0	0	0	0	-2.13824	-2.38407	0	0	0	0	0	0	0	0	0	0	0	0	0	0	0	0
Gm47771	0	0	-1.00293	0	0	0	0	0	0	0	0	0	0	0	0	0	0	0	0	0	0	0	0	0
Gm47889	0	0	0	0	0	0	0	0	0	0	0	-1.28439	0	0	0	0	0	0	0	0	0	0	0	0
Gm48093	0	0	0	0	0	0	0	0	0	0	0	0	0	-3.38317	0	0	0	0	0	0	0	0	0	0
Gm48094	0	0	0	0	0	0	0	0	0	0	0	0	0	-1.7038	0	0	0	0	0	0	0	0	0	0
Gm48099	0	0	-1.7321	0	0	0	0	0	0	0	0	0	0	0	0	0	0	0	0	0	0	0	0	0
Gm48228	0	0	0	0	0	0	0	0	0	0	0	0	0	-1.22279	0	0	0	0	0	0	0	0	0	0
Gm48249	0	0	0	-1.23394	0	0	0	0	0	0	0	0	0	0	0	0	0	0	0	0	0	0	0	0
Gm48287	0	0	0	0	0	0	0	-1.35025	0	0	0	0	0	0	0	0	0	0	0	0	0	0	0	0
Gm48321	0	0	0	-1.52464	0	0	0	-1.38212	0	0	0	0	0	-1.86649	0	0	0	0	0	0	0	0	0	0
Gm48383	0	0	0	-2.03153	0	0	0	0	0	0	0	0	0	0	0	0	0	0	0	0	0	0	0	0
Gm48500	0	0	0	0	0	0	0	0	0	0	0	0	0	0	0	0	0	0	0	0	0	0	0	0
Gm48512	0	0	0	0	0	0	0	0	0	0	0	0	0	0	0	0	0	0	0	0	0	-2.06315	0	0
Gm48606	0	0	0	-2.42465	0	0	0	0	0	0	0	0	0	0	0	0	0	0	0	0	0	0	0	0
Gm48677	0	0	0	0	0	0	0	0	0	0	0	0	0	-2.76428	0	0	0	0	0	0	0	0	0	0
Gm48678	0	0	0	0	0	0	0	0	0	0	0	0	0	-1.87653	0	0	0	0	0	0	0	0	0	0
Gm4876	0	0	0	0	0	0	0	0	0	0	0	0	0	-2.68146	0	0	0	0	0	0	0	0	0	0
Gm48779	0	0	0	0	0	0	0	0	0	-2.14742	-2.76499	0	0	0	0	0	0	0	0	0	0	0	0	0
Gm49003	0	0	0	0	0	0	0	-1.0895	0	0	0	0	0	0	0	0	0	0	0	0	0	0	0	0
Gm49180	0	0	0	0	0	0	0	0	0	0	0	0	0	0	0	0	0	0	0	0	0	0	0	0
Gm49226	0	0	0	0	0	0	0	0	0	0	0	0	0	-1.89542	0	0	0	0	0	0	0	0	0	0
Gm49272	0	0	0	0	0	0	-2.28801	-1.16822	-2.87633	-1.68982	-3.88285	0	0	0	0	0	0	0	0	0	0	0	0	0
Gm49334	0	0	0	0	0	0	0	0	0	0	0	0	0	-3.60865	0	0	0	0	0	0	0	0	0	0
Gm49380	0	0	0	-1.38566	0	0	0	-1.31421	0	0	0	0	0	0	0	0	0	0	0	0	0	0	0	0
Gm5860	0	0	0	0	0	0	0	0	-2.05421	0	0	0	0	0	0	0	0	0	0	0	0	0	0	0
Gm6277	0	0	0	0	0	0	0	0	0	-1.35414	-1.69159	0	0	0	0	0	0	0	0	0	0	-2.97764	0	0
Gm6665	0	0	0	0	0	0	0	0	0	0	0	0	-2.04599	0	0	0	0	0	0	0	0	0	0	0
Gm6712	0	0	0	0	0	0	0	0	-1.14836	0	0	0	0	0	0	0	0	0	0	0	0	0	0	0
Gm6878	0	0	0	0	-7.12418	-3.81923	0	0	0	0	0	0	0	0	0	0	0	0	0	0	0	0	0	0
Gm6994	0	0	0	0	0	0	0	-1.2047	0	0	0	0	0	0	0	0	0	0	0	0	0	0	0	0
Gm6999	0	0	-2.99304	-1.01023	0	0	-1.32482	0	0	0	0	0	0	0	0	0	0	0	0	0	0	0	0	0
Gm7932	0	0	-1.10189	0	0	0	0	0	0	0	0	0	0	0	0	0	0	0	0	0	0	0	0	0
Gm9869	0	-2.78071	0	0	0	0	0	0	0	0	0	0	0	0	0	0	0	0	0	0	0	0	0	0
Gm9871	0	0	0	0	0	0	0	0	0	0	0	0	0	0	0	-2.63238	0	0	0	0	0	0	0	0
Gm9968	0	0	0	0	0	0	0	-1.4698	0	0	0	0	0	-1.93093	0	0	0	0	0	0	0	0	0	0
Gnai1	0	0	0	0	0	0	0	0	0	0	0	0	0	0	0	0	-2.00616	0	0	0	0	0	0	0
Gnaz	0	0	0	0	0	0	-1.44782	0	0	0	0	0	0	0	0	0	0	0	0	0	0	0	0	0
Gng4	0	0	0	0	0	0	0	0	0	0	0	0	0	0	0	0	-2.66359	0	0	0	0	0	0	0
Gnpda1	0	0	-1.10785	0	0	0	-1.08869	0	0	0	0	0	0	0	0	0	0	0	0	0	0	0	0	0
Gpam	0	0	-1.38076	-1.45447	-2.19175	0	-1.18053	0	-1.47016	-1.77804	0	0	0	0	0	-2.20686	-2.01777	0	0	0	0	0	0	0
Gpc5	0	0	0	0	0	-2.21952	-1.69587	0	0	0	0	0	0	-1.20815	0	0	0	0	0	0	0	0	-3.99778	0
Gpd1	0	0	-2.11285	0	0	0	0	0	0	0	0	0	-2.00802	0	0	0	0	0	0	0	-4.17889	0	0	0
Gphn	-1.09711	0	0	0	0	0	0	0	0	0	0	0	0	0	0	0	0	0	0	0	0	0	0	0
Gpm6a	0	0	-1.04659	0	0	0	0	0	0	0	0	0	0	0	0	0	0	0	0	0	0	0	0	0
Gpr137b	0	0	-1.84472	0	0	0	0	0	0	0	0	0	0	0	0	0	0	0	0	0	0	0	0	0
Gpr137c	0	0	0	0	0	0	0	0	0	0	0	0	0	0	0	-2.8404	0	0	0	0	0	0	0	0
Gpr162	0	0	0	0	0	0	0	0	-2.03693	0	0	0	0	0	0	0	0	0	0	0	0	0	0	0
Gpr63	0	0	0	0	0	0	0	0	0	0	0	0	0	-1.25599	0	0	0	0	0	0	0	0	0	0
Gprc5b	0	0	0	0	-4.49774	0	0	0	0	0	0	0	-2.02251	-1.32698	0	0	0	0	0	0	0	0	0	0
Gprin3	0	0	-1.95412	-1.14145	0	0	0	0	0	0	-2.49657	0	0	-2.02337	0	0	0	0	0	0	0	0	0	0
Gpsm1	0	0	0	0	0	0	0	0	0	0	0	0	0	0	0	0	0	0	0	0	0	-1.4016	0	0
Gpx3	0	0	0	0	0	0	0	0	0	0	-1.01198	0	0	0	0	0	0	0	-1.96367	0	-2.39257	0	0	0
Gpx6	0	0	0	0	0	0	-4.15777	-1.29727	0	0	0	0	0	0	0	0	0	0	0	0	0	0	0	0
Grb10	0	0	0	0	0	0	0	0	0	0	0	0	0	0	-2.28686	0	-1.23685	0	0	0	0	0	0	0
Grb14	0	0	0	0	0	0	0	0	0	0	0	0	0	-1.16647	0	0	0	0	0	0	0	0	0	0
Grb7	0	0	0	-1.01235	0	0	0	0	0	0	0	0	0	0	0	0	0	0	0	0	0	0	0	0
Greb1	0	0	0	0	0	0	0	0	0	0	0	-1.18788	0	0	0	0	0	0	0	0	0	0	0	0
Grem1	0	0	0	0	0	0	0	0	0	0	0	-1.99119	0	0	0	0	0	0	0	0	0	0	0	0
Grhpr	0	0	-1.1494	0	0	0	0	0	0	0	0	0	0	0	0	0	0	0	0	0	0	0	0	0
Grid2	0	0	0	0	0	0	0	0	0	0	0	0	0	0	0	-2.39943	0	0	0	0	0	0	0	0
Grin3a	0	0	0	0	0	0	0	0	-6.38297	-1.95319	0	0	0	0	0	0	0	0	0	0	0	0	0	0
Grip1os2	0	0	0	0	0	0	0	0	0	0	0	0	0	-1.73698	0	0	0	0	0	0	0	0	0	0
Grm7	0	0	0	0	0	0	0	0	0	0	0	0	0	0	0	-2.38286	0	0	0	0	0	0	0	0
Grsf1	0	0	0	0	0	0	0	0	-1.03408	0	0	0	0	0	0	0	0	0	0	0	0	0	0	0
Grtp1	0	0	-1.47908	0	0	0	0	0	0	0	0	0	0	0	0	0	0	0	0	0	0	0	0	0
Gsdmc2	0	0	0	0	0	0	0	0	0	0	0	0	0	0	0	-3.43876	0	0	0	0	0	0	0	0
Gsdmc3	0	0	0	0	0	0	0	0	0	0	0	0	0	0	0	-4.1789	0	0	0	0	0	0	0	0
Gsdme	0	0	0	0	0	-1.17036	0	0	0	0	0	0	0	0	0	0	0	0	0	0	0	0	0	0
Gsta2	0	0	-1.73798	-1.26747	0	0	-2.38132	0	-1.95146	0	-1.69652	0	-3.12862	0	0	0	0	0	-3.28714	0	0	0	0	0
Gsta3	0	0	-1.12879	0	0	0	0	0	0	0	0	0	-2.36063	-1.86831	0	0	0	0	0	0	-3.36721	0	0	0
Gsta4	0	0	0	0	0	0	0	0	-1.57286	0	0	0	0	0	0	0	0	0	0	0	0	0	0	0
Gstm2	0	0	0	0	0	0	0	0	0	0	0	0	-1.48696	0	0	0	0	0	0	0	0	0	0	0
Gstt2	0	0	-1.18726	0	0	0	0	0	0	0	0	0	0	0	0	0	0	0	-1.82953	0	0	0	0	0
Gtf2h2	0	0	-1.19479	0	0	0	0	0	0	0	0	0	0	0	0	0	0	0	0	0	0	0	0	0
Gtpbp6	0	0	0	0	0	0	0	0	0	0	0	0	0	0	0	0	0	0	0	0	0	0	-4.01584	0
Gucy1b1	0	0	0	0	0	0	0	0	0	0	0	0	0	0	0	0	0	0	0	0	0	-1.3001	0	0
Gucy2g	0	0	0	0	0	-2.63834	0	0	0	0	0	0	0	0	0	0	0	0	0	0	0	0	-4.97619	0
Guf1	0	0	0	0	0	0	0	0	0	0	-1.2495	0	0	0	0	0	0	0	0	0	0	0	0	0
Gulp1	0	0	0	0	0	0	0	0	0	0	0	0	0	0	0	0	-2.14179	0	0	0	0	0	0	0
Gys2	0	0	-3.88243	0	0	0	0	0	0	0	0	0	0	0	0	0	0	0	0	0	0	0	0	0
H2-Ke6	0	0	0	0	0	0	0	0	0	0	0	0	0	-1.40029	0	0	0	0	0	0	0	0	0	0
Haao	0	0	-2.63598	-1.18886	0	0	0	0	0	0	0	0	0	0	0	0	0	0	-3.37216	0	0	0	0	0
Hacd2	0	0	-1.19626	0	0	0	0	0	0	0	0	0	0	0	0	0	0	0	0	0	0	0	0	0
Hadh	0	0	-1.28909	0	0	0	-1.39135	0	-1.90522	0	-1.88718	0	0	0	0	0	0	0	0	0	-3.0234	0	0	0
Hagh	0	0	0	0	-2.51519	0	0	0	0	0	0	0	0	0	0	0	0	0	0	0	0	0	0	0
Halr1	0	0	-1.78724	0	0	0	0	0	0	0	0	0	0	0	0	0	0	0	0	0	0	0	0	0
Hao2	0	0	0	0	0	0	-1.70845	0	-1.98011	0	-1.7809	0	0	0	0	0	0	0	-2.25662	0	0	0	0	0
Haus4	0	0	0	0	0	0	0	0	0	0	0	0	-1.3999	0	0	0	0	0	0	0	0	-2.15915	0	0
Hbp1	0	0	0	0	0	0	0	0	0	-1.10251	0	0	0	0	0	0	0	0	0	0	0	0	0	0
Hcar1	0	0	0	0	0	0	0	0	0	0	0	0	0	0	0	0	0	0	0	0	-5.18078	0	0	0
Hdac5	0	0	0	0	0	0	0	0	0	-1.52215	0	0	0	0	0	0	0	0	0	0	0	0	0	0
Hdac7	0	0	0	0	0	0	0	0	0	0	0	0	0	-1.01959	0	0	0	0	0	0	0	0	0	0
Hebp1	0	0	-1.20614	0	0	0	0	0	0	0	0	0	0	0	0	0	0	0	0	0	0	0	0	0
Hecw2	0	0	-1.90798	0	0	0	0	0	0	0	0	0	0	0	0	0	0	0	0	0	0	0	0	0
Hemk1	0	0	-1.25781	0	0	0	0	0	0	0	0	0	0	0	0	0	0	0	0	0	0	0	0	0
Herpud1	0	0	0	-1.07711	0	0	0	0	0	0	0	0	0	0	0	0	0	0	0	0	0	0	0	0
Hexb	0	0	-1.23467	0	0	0	0	0	0	0	0	0	0	0	0	0	0	0	0	0	0	0	0	0
Hexdc	0	0	0	0	0	0	0	0	-1.2482	0	0	0	0	0	0	0	0	0	0	0	0	0	0	0
Hgd	0	0	-1.72462	-1.19354	0	0	-2.77818	0	-2.26115	0	-2.0298	0	0	0	0	0	0	0	-2.39548	0	-3.11352	0	0	0
Hhatl	0	0	0	0	0	0	0	0	0	0	0	0	0	0	0	0	-2.592	0	0	0	0	0	0	0
Hibadh	0	0	0	0	0	0	0	0	0	0	0	0	0	0	0	0	0	0	-1.42562	0	0	0	0	0
Hint2	0	0	0	0	0	0	0	0	0	0	0	0	0	0	0	0	0	0	-1.94576	0	0	0	0	0
Hipk2	0	0	0	0	0	0	0	0	0	0	0	0	0	0	0	0	0	0	-1.5339	-1.2599	0	0	0	0
Hlf	0	0	-2.05335	0	0	0	-1.94737	0	-1.38924	0	-1.84569	0	0	0	0	0	0	0	-3.65611	-1.69306	-3.49286	-1.65751	0	0
Hmgcll1	0	0	0	0	0	0	0	0	-1.26108	0	0	0	0	0	0	0	0	0	0	0	0	0	0	0
Hmgcr	0	0	-1.41238	0	0	0	-1.0688	0	0	0	0	0	0	0	0	0	0	0	0	0	0	0	0	0
Hmgcs1	0	0	-1.66289	0	0	0	-1.2646	0	0	0	0	0	0	0	-1.78428	0	0	0	0	0	0	0	0	0
Hmgcs2	0	0	0	-3.56608	0	0	0	0	0	0	0	0	0	0	0	0	0	0	0	0	0	0	0	0
Hmx2	0	0	0	0	0	0	0	0	0	0	0	0	0	0	0	0	-1.66959	0	0	0	0	0	0	0
Hnf1a	0	0	-1.12779	0	0	0	0	0	0	0	0	0	-3.61641	0	0	0	0	0	0	0	0	0	0	0
Hnf1aos1	0	0	-1.00834	0	0	0	0	0	0	0	0	0	0	0	-1.44598	0	0	0	0	0	0	0	0	0
Hnf4a	0	0	0	0	0	0	-1.23961	0	-1.36474	0	0	0	0	0	0	0	0	0	0	0	0	0	0	0
Hnf4aos	0	0	-2.74881	-1.45227	0	0	0	0	0	0	0	0	0	0	0	0	0	0	0	0	0	0	0	0
Hnmt	0	0	0	0	0	0	-1.28021	0	0	0	0	0	0	0	0	0	0	0	0	0	0	0	0	0
Hnrnpr	0	0	0	0	0	-1.22145	0	0	0	0	0	0	0	-1.29045	0	0	0	0	0	0	0	0	0	0
Hoxaas3	0	0	0	0	0	0	0	-1.0042	0	0	0	0	0	0	0	0	0	0	0	0	0	0	0	0
Hoxb3os	0	0	-1.16454	-1.36236	0	0	0	0	0	0	0	0	0	-1.07164	0	0	0	0	0	0	0	0	0	0
Hoxb4	0	0	0	0	0	0	0	0	0	0	0	0	0	-1.04705	0	0	0	0	0	-1.57167	0	0	0	0
Hoxb5	0	0	0	0	0	0	0	0	0	0	0	-1.27489	0	0	0	0	0	0	0	0	0	0	0	0
Hoxc4	0	0	0	0	0	0	0	0	0	0	0	0	0	0	0	0	0	0	0	0	0	-1.19537	0	0
Hoxd3os1	0	0	0	0	0	0	0	0	0	0	0	0	0	-1.13642	0	0	0	0	0	0	0	0	0	0
Hp	0	0	0	0	0	0	0	0	0	0	0	0	0	0	0	0	0	0	0	0	0	0	-5.74882	0
Hpgd	0	0	0	0	0	0	0	0	0	0	0	0	0	0	0	0	0	0	0	0	-1.81829	0	0	0
Hs3st3b1	0	0	0	0	0	0	-1.14761	0	0	0	0	0	0	0	0	0	0	0	0	0	0	0	0	0
Hsd11b1	0	0	0	0	0	0	0	0	0	0	0	0	0	0	0	0	0	0	0	0	0	-1.47213	0	0
Hsd11b2	0	0	0	-1.48161	0	0	0	0	0	0	0	0	0	0	0	0	0	0	0	0	0	0	0	0
Hsd17b14	0	0	0	0	0	0	-2.03243	-1.11208	0	0	0	0	0	0	0	0	0	0	0	0	0	0	0	0
Hsd3b2	-5.634	0	-2.57102	-1.60755	0	0	0	0	0	0	0	0	-5.41535	0	0	0	0	0	-3.18042	0	0	0	0	0
Hsd3b3	0	0	-2.32066	-1.74968	-5.33249	0	0	0	0	0	0	0	0	0	0	0	0	0	0	0	0	0	0	0
Hspa13	0	0	0	0	0	0	0	0	0	0	0	0	-1.41532	0	0	0	0	0	0	0	0	0	0	0
Hspa1b	0	0	0	0	0	-1.15716	0	0	0	0	0	0	0	0	0	0	0	0	0	0	0	0	0	0
Hspb2	0	0	0	0	0	0	0	0	0	0	0	0	0	0	0	0	0	0	0	0	0	0	-3.4886	0
Htr1b	0	0	0	0	0	0	0	-1.43148	0	0	0	0	0	0	0	0	0	0	0	0	0	0	0	0
Hykk	0	0	-1.52621	-1.17866	0	0	0	0	0	0	0	0	0	0	0	0	0	0	-2.59711	0	0	0	0	0
Ica1l	0	0	0	0	0	0	0	0	0	0	0	0	0	0	0	0	0	0	0	-2.49187	0	0	0	0
Id3	0	0	0	0	0	0	0	0	0	0	0	0	0	0	0	0	0	0	0	-1.45054	0	0	0	0
Id4	0	0	0	0	0	0	-1.07972	0	0	0	0	0	0	0	0	0	0	0	-2.94643	0	0	0	0	0
Idh1	0	0	0	0	0	0	-1.20826	0	0	0	0	0	0	0	0	0	0	0	0	0	0	0	0	0
Idh2	0	0	-1.01643	0	0	0	-1.00656	0	-1.37671	0	0	0	0	0	0	0	0	0	0	0	0	0	0	0
Idh3g	0	0	0	0	0	0	-1.1784	0	0	0	0	0	0	0	0	0	0	0	0	0	0	0	0	0
Idi1	0	0	-1.64717	0	0	0	-1.76664	0	0	0	0	0	0	0	0	0	-2.82972	0	0	0	0	0	0	0
Ids	0	0	0	0	0	0	-1.02816	0	0	0	0	0	0	0	0	0	0	0	0	0	0	0	0	0
Idua	0	0	0	-1.51346	0	0	0	0	0	0	0	0	0	0	0	0	0	0	0	0	0	0	0	0
Iffo1	0	0	-1.12853	0	0	0	0	0	0	0	0	0	0	0	0	0	0	0	0	0	0	0	0	0
Ifit1bl2	0	0	0	0	0	0	-1.32827	0	0	0	0	0	0	0	0	0	0	0	0	0	0	0	0	0
Igdcc3	0	0	0	0	0	0	0	0	0	0	0	0	0	-1.52392	0	0	0	0	0	0	0	0	0	0
Igf1	0	0	0	0	0	0	-3.16441	-1.79241	0	0	0	0	0	0	0	0	0	0	0	0	0	0	0	0
Igfbp3	0	0	0	0	0	0	0	0	0	0	0	0	0	0	0	0	0	0	0	-1.50755	-4.89135	-3.13998	0	0
Igfbp4	0	0	-1.62908	-1.379	0	0	-1.57144	0	-2.39136	0	-2.43322	0	-2.26807	0	-2.71711	0	0	0	-3.76177	-1.21831	-2.67968	0	0	0
Igfbp5	0	0	-1.83679	0	0	0	-1.16006	0	-2.0209	0	0	0	-1.64934	0	0	0	-2.93954	-2.6608	-5.59084	-3.58886	0	0	0	0
Igip	0	0	0	0	0	0	0	0	0	0	0	0	0	-1.12215	0	0	0	0	0	0	0	0	0	0
Il17rb	0	0	0	0	0	0	0	-1.52283	0	0	0	0	0	0	0	0	0	0	0	0	0	0	0	0
Il4i1	0	0	0	0	0	0	0	0	0	0	0	0	0	0	0	0	0	0	0	0	0	0	0	0
Inmt	0	0	-2.50825	0	0	0	0	0	0	0	-3.70908	0	0	0	-4.36636	0	0	0	0	0	0	0	0	0
Inpp4b	0	0	0	0	0	0	0	0	0	0	0	0	0	0	0	0	0	0	-1.35545	0	0	0	0	0
Inpp5a	0	0	0	0	0	0	0	0	-2.01751	0	0	0	0	0	0	0	0	0	0	0	0	0	0	0
Insig1	0	0	-3.35729	-1.73723	0	0	-2.45936	0	0	0	0	0	0	0	0	0	-2.70019	0	0	0	0	0	0	0
Insr	0	0	0	0	0	0	0	0	0	0	0	0	0	0	0	0	0	0	0	0	0	-1.39909	0	0
Insrr	0	0	0	0	0	0	0	0	0	0	0	0	0	0	0	-3.1374	-2.1635	-1.12023	0	0	0	0	0	0
Ints6l	0	0	0	0	0	0	0	0	0	0	0	0	0	-1.02415	0	0	0	0	0	0	0	0	0	0
Ipcef1	0	0	0	0	0	0	-2.03794	-1.30242	0	0	-1.22553	-1.38898	0	-1.90637	-1.26929	0	-1.7436	0	0	0	0	0	0	0
Iqck	0	0	0	0	0	0	0	0	0	0	0	0	-2.14654	0	0	0	0	0	0	0	0	0	0	0
Iqcm	0	0	0	-2.56882	0	-3.22277	0	-2.5514	0	0	0	0	0	-2.75587	0	0	0	0	0	0	0	-2.14939	0	0
Irs1	0	0	0	0	0	0	-1.26985	0	-1.07297	0	-1.44086	0	0	0	0	0	-1.4376	0	0	0	0	0	0	0
Irs2	0	0	0	-1.40353	0	0	-1.05044	0	0	-1.7715	0	0	0	0	0	0	0	0	0	0	0	0	0	0
Iscu	0	0	0	0	0	0	0	0	-1.31836	0	0	0	0	0	0	0	0	0	0	0	0	0	0	0
Ism2	0	0	0	0	0	0	0	0	0	0	0	0	-3.18269	0	0	0	0	0	0	0	0	0	0	0
Isoc2a	0	0	-1.98249	-1.68494	0	0	-1.07395	0	0	0	-1.52165	0	-2.11607	0	0	0	0	0	0	0	0	0	0	0
Isoc2b	0	0	0	0	0	0	-1.54978	0	0	0	0	0	0	0	0	0	0	0	0	0	0	0	0	0
Ispd	0	0	0	0	0	0	0	0	0	0	0	0	0	0	0	0	0	0	0	0	0	-1.86676	0	0
Isyna1	0	0	0	0	0	0	0	0	-1.97411	-1.52244	0	0	0	0	0	0	0	0	0	0	0	0	0	0
Itga1	0	0	0	0	0	0	0	0	-1.03547	0	-1.05844	0	0	0	0	0	0	0	0	0	-1.40275	0	0	0
Itga8	0	0	0	0	0	0	0	0	0	0	0	0	0	0	0	0	0	0	0	0	0	-1.50953	0	0
Itga9	0	0	0	0	0	0	0	0	0	0	0	0	0	0	0	0	0	0	0	-1.00832	0	0	0	0
Itgae	0	0	0	0	0	0	-1.36571	-1.13335	0	0	0	0	0	0	0	0	0	0	0	0	0	0	0	0
Itgb1bp1	0	0	0	0	0	0	0	0	0	0	0	0	0	0	0	0	0	0	0	0	0	0	0	0
Itgb2l	0	0	0	0	0	0	0	0	0	0	0	0	0	-2.07608	0	0	0	0	0	0	0	0	0	0
Itgb3bp	0	0	0	0	0	-1.135	0	0	0	0	0	0	0	0	0	0	0	0	0	0	0	0	0	0
Itih5	0	0	0	0	0	0	0	0	0	0	0	0	0	0	0	0	0	0	0	0	0	-2.46869	0	0
Itpkb	0	0	0	0	0	0	0	0	-1.66419	0	0	0	0	0	0	0	0	0	0	0	0	0	0	0
Itpr2	0	0	-2.4221	0	0	0	-1.28164	0	-1.41799	0	-1.48421	0	0	0	0	0	0	0	0	0	0	0	0	0
Ivd	0	0	0	0	0	0	0	0	0	0	-1.25412	0	0	0	0	0	-2.1805	0	0	0	0	0	0	0
Iyd	0	0	-1.16321	0	0	0	0	0	0	0	0	0	0	0	0	0	0	0	0	0	0	0	0	0
Jdp2	0	0	0	0	0	0	-1.28583	0	0	0	0	0	0	0	0	0	0	0	0	0	0	0	0	0
Jmy	0	0	0	0	0	0	0	0	0	-1.13593	0	0	0	0	0	0	0	0	0	0	0	0	0	0
Jun	0	0	0	0	0	0	0	0	0	0	0	0	0	0	-1.896	0	0	0	0	0	0	0	0	0
Kalrn	0	0	0	0	0	0	0	0	-2.13717	-1.39317	-1.12868	0	0	0	0	0	0	0	0	0	0	0	0	0
Kap	-2.42599	0	-2.17449	0	-2.23135	0	-2.54559	0	-2.78236	0	-2.34443	0	-2.05305	0	-2.11508	0	-2.09221	0	-3.08002	0	-3.27716	0	0	0
Kcnb2	0	0	0	-1.12126	0	0	0	0	0	0	0	0	0	0	0	0	0	0	0	0	0	0	0	0
Kcnc2	0	0	-1.81764	-1.46741	0	0	0	0	0	0	0	0	0	0	0	0	0	0	0	0	0	0	0	0
Kcnc3	0	0	0	0	0	0	-1.09929	0	0	0	0	0	0	0	0	0	0	0	0	0	0	0	0	0
Kcnd3	0	0	0	0	0	0	0	0	0	0	0	0	0	0	0	0	0	0	0	0	0	-2.899	0	0
Kcnd3os	0	0	0	0	0	0	0	0	0	0	0	0	0	0	0	0	0	0	0	0	0	-3.75655	0	0
Kcne1	0	0	0	0	0	0	0	0	0	0	0	0	-1.96513	0	0	0	0	0	0	0	0	0	0	0
Kcnip4	0	0	0	0	0	0	0	0	0	0	0	0	0	-1.41722	0	0	0	0	0	0	0	0	0	0
Kcnj1	0	0	0	0	0	0	0	0	-1.04954	0	-1.00029	0	0	0	0	0	0	0	0	0	0	0	0	0
Kcnj10	0	0	0	0	0	0	-1.37099	0	0	0	0	0	0	0	0	0	0	0	0	0	0	0	0	0
Kcnj13	0	0	0	0	0	0	0	-1.06343	0	0	0	0	0	0	0	0	0	0	0	0	0	0	0	0
Kcnj15	0	0	0	-1.026	0	0	0	0	-1.76159	0	0	0	-1.99833	0	0	0	0	0	-2.50637	0	-2.4927	0	0	0
Kcnj8	0	0	0	0	0	0	0	0	0	0	0	0	0	0	0	0	0	0	0	0	0	-3.59726	0	0
Kcnma1	0	0	0	0	0	0	-2.47469	0	0	0	0	0	0	0	0	0	0	0	0	0	0	0	0	0
Kcnn1	0	0	0	0	0	0	-1.72712	0	0	0	0	0	0	0	0	0	0	0	0	0	0	0	0	0
Kcnn2	0	0	0	0	0	0	-1.3063	-1.05119	-2.3458	0	0	0	0	0	0	0	0	0	0	0	0	0	0	0
Kcnn3	0	0	0	0	0	0	0	0	0	0	0	0	-3.47986	-4.27984	0	0	0	0	0	0	0	0	0	0
Kcnq1ot1	0	0	0	0	0	0	0	0	0	0	0	0	0	-1.74633	0	-1.14879	0	0	0	0	0	0	0	0
Kcnt1	0	0	0	0	0	0	-1.5954	-1.87187	0	0	0	0	0	0	0	0	0	0	-3.59483	0	0	0	0	0
Kctd8	0	0	0	0	0	0	0	0	0	0	0	0	0	0	-2.25121	0	0	0	0	0	0	0	0	0
Kdm1b	0	0	0	0	0	0	0	0	0	0	0	0	0	0	0	0	0	0	-2.43641	0	0	0	0	0
Kdr	0	0	0	0	0	0	0	0	0	0	0	0	0	0	0	0	0	0	0	-1.62673	0	0	0	0
Keg1	0	0	-1.15571	-1.64263	0	0	-2.04557	0	-2.00301	0	-1.93692	0	-2.4152	0	0	0	-2.14129	0	-3.11782	0	-3.17601	0	0	0
Khk	0	0	-1.76571	0	0	0	-1.68143	0	-2.21247	0	-1.73613	0	-1.35836	0	0	0	0	0	-2.77703	0	0	0	0	0
Kif12	0	0	0	0	0	0	0	0	0	0	0	0	0	-1.0678	0	0	0	0	0	0	0	0	0	0
Kif5a	0	0	-2.22436	0	0	0	0	0	0	0	0	0	0	0	0	0	0	0	0	0	0	0	0	0
Kifc2	0	0	0	0	0	0	0	-1.02334	0	0	0	0	0	0	0	0	0	0	0	0	0	0	0	0
Kirrel3	0	0	0	0	0	0	-1.57586	0	0	0	0	0	0	0	0	0	0	0	0	0	0	0	0	0
Kitl	0	0	0	0	0	0	0	0	0	0	-1.26454	0	0	0	0	0	0	0	0	0	0	0	0	0
Kl	0	0	-2.01601	0	0	0	-1.56002	0	-2.70824	-1.16536	-1.55682	0	0	0	0	0	0	0	0	0	-2.18191	0	0	0
Klf15	0	0	0	0	0	0	-1.2852	0	-1.29976	0	-1.19073	0	0	0	0	0	0	0	0	0	0	0	0	0
Klf9	0	0	0	0	0	0	0	0	0	0	0	0	0	0	0	0	0	0	0	-1.11476	0	0	0	0
Klhdc7a	0	0	-1.05572	0	0	0	0	0	0	0	0	0	0	0	0	0	0	0	0	0	0	0	0	0
Klhdc8b	0	0	0	0	0	0	0	0	0	0	0	0	0	0	0	0	0	0	0	0	0	-1.87171	0	0
Klhl24	0	0	0	0	0	0	0	0	0	-1.40161	0	-1.02416	0	0	0	0	0	0	0	0	0	0	0	0
Klhl3	0	0	0	0	0	0	-1.71207	-1.10272	-3.0562	-1.43268	-2.26187	-1.17928	0	-1.13727	0	0	-1.92645	0	0	0	0	0	0	0
Klhl32	0	0	0	0	0	0	0	0	-1.4301	0	0	0	0	0	0	0	0	0	0	0	0	0	0	0
Klk1	0	0	0	0	0	0	0	0	0	0	-1.47088	0	0	0	0	0	0	0	0	0	0	0	0	0
Klkb1	0	0	0	0	0	0	0	0	0	0	0	0	0	0	-4.0694	0	0	0	0	0	0	0	0	0
Kmo	0	0	-2.59736	-1.60724	0	0	0	-1.07389	0	0	0	0	0	0	0	0	0	0	-3.03768	0	0	0	0	0
Kng2	0	0	0	0	0	0	0	0	0	0	-1.18063	0	0	0	0	0	0	0	0	0	0	0	0	0
Krt23	0	0	0	0	0	0	0	0	0	0	0	0	0	0	0	0	0	0	0	0	0	0	-2.69014	0
Krt80	0	0	0	0	0	0	0	0	0	0	0	0	0	0	0	0	-1.95273	0	0	0	0	0	0	0
Ksr1	0	0	0	0	0	0	0	0	0	0	0	0	0	0	0	0	0	0	0	0	0	-1.04516	0	0
Ksr2	0	0	-1.96754	0	0	0	0	0	0	0	0	0	0	0	0	0	0	0	0	0	0	0	-3.77659	0
Kyat1	0	0	0	0	0	0	-1.13844	0	0	0	-1.24662	-1.3224	-1.50161	-1.71997	0	0	0	0	0	0	0	0	0	0
Kyat3	0	0	-1.3868	0	0	0	0	0	0	0	0	0	0	0	0	0	0	0	0	0	0	0	0	0
Kynu	0	0	-2.6785	-1.50638	0	0	0	0	0	0	0	0	0	0	0	0	0	0	0	0	0	0	0	0
L2hgdh	0	0	-1.35039	-1.09837	0	0	0	0	0	0	0	0	0	0	0	0	0	0	0	0	0	0	0	0
L3hypdh	0	0	-1.50748	0	0	0	0	0	0	0	0	0	0	0	0	0	0	0	0	0	0	0	0	0
Lactb2	0	0	-1.53625	0	0	0	0	0	0	0	0	0	0	0	0	0	0	0	0	0	0	0	0	0
Lama1	0	0	0	0	0	0	-1.42497	0	0	0	0	0	0	0	0	0	0	0	0	0	0	0	0	0
Lamb2	0	0	0	0	0	0	0	0	0	0	0	0	0	0	0	0	0	0	0	0	0	0	-2.83081	0
Lamb3	0	0	0	0	0	0	0	0	0	0	0	0	0	0	0	0	0	0	0	0	0	-2.19957	0	0
Lamc3	0	0	0	0	0	0	0	0	0	0	0	0	0	0	0	0	0	0	0	0	0	-2.168	0	0
Lamtor2	0	0	0	0	-1.82191	0	0	0	0	0	0	0	0	0	0	0	0	0	0	0	0	0	0	0
Larp1b	0	0	0	0	0	0	0	0	-1.70684	0	-1.01236	0	0	0	0	0	0	0	0	0	0	0	0	0
Lars2	-1.73368	0	0	0	0	0	0	0	0	0	0	0	0	0	0	0	0	0	0	0	0	0	0	0
Ldb2	0	0	0	0	0	0	0	0	0	0	0	0	0	0	0	0	0	0	0	0	0	-1.67229	0	0
Ldlr	0	0	-2.28776	0	0	0	-1.9788	0	-1.08404	0	0	0	0	0	0	0	0	0	0	0	0	0	0	0
Lekr1	0	0	0	0	0	0	0	0	0	0	0	0	-1.57155	0	0	0	0	0	0	0	0	0	0	0
Leng8	0	0	0	0	0	0	0	0	0	0	0	0	0	-1.0901	0	0	0	0	0	0	0	-1.51213	0	0
Lhx1	0	0	-1.26171	0	0	0	0	0	-1.33264	0	-1.4932	0	0	0	0	0	0	0	0	0	-3.5051	0	0	0
Lhx1os	0	0	0	0	0	0	0	0	-1.60319	0	-2.04459	0	0	0	0	0	0	0	0	0	0	0	0	0
Lifr	0	0	0	0	0	0	0	0	0	0	0	0	0	0	0	0	0	0	0	0	0	0	-2.03306	0
Limch1	0	0	-2.33939	-1.7898	0	0	0	0	0	0	-1.07512	0	0	0	0	0	0	0	0	-1.20045	0	0	0	0
Lin7a	0	0	-4.14736	-2.59112	0	0	0	0	0	0	-2.16722	0	0	0	0	0	0	0	0	0	0	0	0	0
Lingo2	0	0	0	0	0	0	0	0	0	0	0	0	0	-1.23514	0	0	0	0	0	0	0	0	0	0
Lipa	0	0	-2.13622	-1.24904	0	0	-1.03667	0	-1.79298	0	-2.27379	0	0	0	0	0	0	0	0	0	0	0	0	0
Lmcd1	0	0	0	0	0	0	0	0	0	0	0	0	0	0	0	0	0	0	0	0	0	0	-4.88499	0
Lmo7	0	0	0	0	0	0	0	0	0	0	0	0	-1.27267	-1.07434	0	0	0	0	0	0	0	0	0	0
Lnx1	0	0	0	0	0	-2.32377	-1.13979	0	0	0	0	0	0	0	0	0	0	0	0	0	0	0	0	0
Lonrf1	0	0	-1.18923	-1.34597	0	0	-1.07732	0	0	0	0	0	0	0	0	0	0	0	0	0	0	0	0	0
Lonrf3	0	0	0	-1.51906	0	0	0	0	0	0	0	0	0	0	0	0	0	0	0	0	0	0	0	0
Loxl4	0	0	0	0	0	0	0	0	0	0	0	0	0	0	0	0	0	0	0	0	0	0	0	0
Lpar3	0	0	-2.22409	-1.09601	0	0	0	0	0	0	0	0	0	0	0	0	0	0	0	0	0	0	0	0
Lpin1	0	0	-1.24697	-1.06884	0	0	0	0	-1.22067	0	-1.9625	0	0	0	0	0	0	0	0	0	0	0	0	0
Lpl	0	0	-1.36314	-1.17688	0	0	-2.89434	0	-2.51605	0	-2.22985	0	0	0	0	0	0	0	-2.03502	0	0	0	0	0
Lrfn1	0	0	0	0	0	0	0	0	0	0	0	0	0	0	0	0	0	0	0	0	0	0	0	0
Lrfn2	0	0	0	0	0	0	0	0	0	0	0	0	0	0	0	0	0	0	0	0	0	-2.34873	0	0
Lrig1	0	0	0	0	0	0	0	0	0	0	0	0	-2.08339	0	0	0	0	0	0	0	0	0	0	0
Lrit3	0	0	0	-3.78533	0	0	0	0	0	0	0	0	0	0	0	0	0	0	0	0	0	0	0	0
Lrp1b	0	0	0	0	0	0	0	0	0	0	0	0	0	-1.49815	0	0	0	0	0	0	0	0	0	0
Lrp2	-2.99882	0	-2.56265	0	-3.12195	0	-2.87636	0	-3.83107	0	-2.76984	0	-2.90562	0	-3.14797	0	-2.86584	0	-3.09203	0	-3.72241	0	0	0
Lrp4	0	0	-2.14978	-1.32848	0	0	0	0	0	0	0	0	0	0	0	0	0	0	0	0	0	0	0	0
Lrpap1	0	0	-1.6329	0	0	0	-1.0329	0	0	0	0	0	0	0	0	0	0	0	0	0	0	0	0	0
Lrrc19	0	0	-1.02399	0	-2.34172	0	0	0	0	0	0	0	0	0	0	0	0	0	0	0	0	0	0	0
Lrrc31	0	0	0	0	0	0	-1.28701	0	0	0	0	0	0	0	0	0	0	0	0	0	0	0	0	0
Lrrc3b	0	0	0	0	0	0	0	0	0	0	0	0	0	0	0	0	0	0	0	-2.60372	0	0	0	0
Lrrc4	0	0	0	0	0	-1.70822	0	0	0	0	0	0	0	-1.15316	0	0	0	0	0	0	0	0	0	0
Lrrc52	0	0	0	0	0	0	0	0	-4.05766	-1.29435	-2.89406	0	0	0	0	0	0	0	0	0	0	0	0	0
Lrrc66	0	0	0	0	0	0	-2.48764	-1.55754	-2.13488	-1.2853	-1.89909	0	0	0	0	0	0	0	0	0	0	0	0	0
Lrrc71	0	0	0	0	0	0	0	0	0	0	0	0	0	0	0	0	0	0	0	0	0	-2.53792	0	0
Lrrc8b	0	0	-1.01982	0	0	0	0	0	0	0	0	0	0	0	0	0	0	0	0	0	0	0	0	0
Lrrc8e	0	0	0	0	0	0	0	0	0	0	0	0	0	0	0	0	0	0	0	0	0	0	-3.48621	0
Lrrn1	0	0	0	0	0	0	0	0	0	0	0	0	0	0	0	0	0	0	0	0	-4.10379	-3.25589	0	0
Lrrtm1	0	0	0	0	0	0	0	0	0	0	0	0	-3.7754	0	0	0	0	0	0	0	0	0	0	0
Lsamp	0	0	0	0	0	0	0	0	0	0	0	0	0	0	0	0	-1.45514	0	0	0	0	0	0	0
Ltbp1	0	0	0	0	0	0	0	0	0	0	0	0	0	0	0	0	0	0	-3.64756	-1.92528	0	0	0	0
Ltbp4	0	0	0	0	0	0	0	0	0	0	0	0	0	0	0	0	0	0	-3.00206	0	0	0	0	0
Lurap1l	0	0	-1.32429	0	0	0	0	0	0	0	0	0	0	0	0	0	0	0	0	0	0	0	0	0
Lypd1	0	-2.87636	0	0	0	0	0	0	0	0	0	0	0	0	0	0	0	0	0	0	0	0	0	0
Lypd2	0	0	0	0	0	0	0	0	0	0	0	0	0	0	0	0	0	0	0	0	0	0	-4.28035	0
Lypd6	0	0	0	0	0	0	0	0	0	0	0	0	0	-1.44096	0	0	0	0	0	0	0	0	0	0
Lyplal1	0	0	-2.0177	-1.32053	0	0	0	0	0	0	0	0	-1.65007	0	0	0	0	0	0	0	-3.42778	0	0	0
Lyrm7	0	0	0	0	0	0	-1.1006	0	0	0	0	0	0	0	0	0	0	0	0	0	0	0	0	0
Lysmd4	0	0	0	0	0	-1.60144	0	0	0	0	0	0	0	-1.89254	0	0	0	0	0	-1.26414	0	0	0	0
Lyst	0	0	0	0	0	0	0	0	0	0	-1.36808	-1.08473	-2.11789	-1.50721	0	0	0	0	0	0	0	0	0	0
Lzts3	0	0	0	0	0	0	-1.07568	0	0	0	0	0	0	0	0	0	0	0	-2.61089	0	0	0	0	0
Macrod1	0	0	0	0	0	0	0	0	-1.45584	0	0	0	0	0	0	0	0	0	0	0	0	0	0	0
Macrod2	0	0	-1.50159	0	0	0	0	0	0	0	0	0	0	0	0	0	0	0	0	0	0	0	0	0
Maf	0	0	0	0	0	0	0	0	0	0	0	0	0	0	0	0	0	0	0	0	-2.31917	-1.4836	0	0
Magi2	0	0	0	0	0	0	0	0	0	0	-1.1321	0	0	-1.32665	0	0	0	0	0	0	0	0	0	0
Magi3	0	0	0	0	0	0	-1.24524	0	0	0	0	0	0	0	0	0	0	0	0	0	0	0	0	0
Malat1	0	0	0	0	0	-1.20289	0	0	0	0	0	0	0	-1.38942	0	0	0	0	0	0	0	0	0	0
Malrd1	0	0	0	0	0	0	0	0	0	0	-1.17048	0	0	0	-2.17762	0	-1.45459	-1.16253	0	0	0	0	0	0
Maml3	0	0	0	0	0	0	0	0	0	0	0	0	0	0	0	0	0	0	0	0	0	-1.11734	0	0
Man2a1	0	0	-1.00408	-1.03043	0	0	0	0	0	0	0	0	0	0	0	0	0	0	0	0	0	0	0	0
Maoa	0	0	0	0	0	0	0	0	0	0	0	0	0	0	0	-1.84596	0	0	0	0	0	0	0	0
Maob	0	0	0	0	0	0	0	0	-2.58396	-1.65603	-2.70736	0	0	0	0	0	0	0	0	0	0	0	0	0
Map2	0	0	0	0	0	0	0	0	0	0	0	0	-1.59353	-1.24779	0	0	0	0	0	0	0	0	0	0
Map2k6	0	0	-1.46874	0	0	0	-1.87809	0	-1.36354	0	-2.18172	-1.16494	-1.73115	0	0	0	-4.18426	0	0	0	0	0	0	0
Map3k15	0	0	0	0	0	0	-1.08809	0	0	0	0	0	0	0	0	0	0	0	0	0	0	0	0	0
Map3k21	0	0	0	0	0	0	0	0	0	0	0	0	-1.63064	0	0	0	-1.97271	0	0	0	0	0	0	0
Mapk10	0	0	0	0	0	0	0	0	-2.59406	-1.28095	0	0	0	0	0	0	0	0	0	0	0	0	0	0
Mapk15	0	0	0	0	0	0	0	-1.17564	0	-1.16494	0	0	0	0	0	0	0	0	0	0	0	0	0	0
Mapk1ip1	0	0	0	0	0	0	0	0	0	0	0	0	0	0	0	0	0	0	0	0	0	-1.65922	0	0
Mapre2	0	0	0	0	0	0	-1.03629	0	-1.29389	0	0	0	0	0	0	0	0	0	0	0	0	0	0	0
Mapt	0	0	0	0	0	0	0	0	0	0	0	0	0	0	0	0	0	0	0	-1.35543	0	-2.13175	0	0
March1	0	0	0	-1.01053	0	0	0	0	0	0	0	0	0	0	0	0	0	0	0	0	0	0	0	0
March3	0	0	0	0	0	0	0	0	0	0	0	0	0	0	0	0	-1.60875	0	0	0	0	0	0	0
March6	0	0	-1.01845	0	0	0	0	0	0	0	0	0	0	0	0	0	0	0	0	0	0	0	0	0
Masp2	0	0	0	0	0	-2.83573	0	0	0	0	0	0	0	0	0	0	0	0	0	0	0	0	0	0
Mast3	0	0	0	-1.23875	0	0	0	0	0	0	0	0	0	0	0	0	0	0	0	0	0	0	0	0
Mast4	0	-1.07795	0	0	0	0	0	0	0	0	0	0	0	0	0	0	0	0	0	0	0	0	0	0
Matn4	0	0	0	0	0	0	0	0	-2.56439	0	0	0	0	0	0	0	0	0	0	0	0	0	0	0
Mbd4	0	0	0	0	0	0	0	0	0	0	0	0	0	-1.67102	0	0	0	0	0	0	0	0	0	0
Mboat2	0	0	0	0	0	0	0	0	0	0	0	0	0	0	0	0	-1.70667	0	0	0	0	0	0	0
Mccc1	0	0	-1.12109	0	0	0	0	0	-1.13485	0	-2.25143	-1.0031	0	0	0	0	0	0	0	0	0	0	0	0
Mccc2	0	0	-1.25192	0	0	0	0	0	0	0	0	-1.09267	0	0	0	0	0	0	0	0	0	0	0	0
Mcf2l	0	0	0	0	0	0	0	0	0	0	0	0	0	0	0	0	0	0	0	-1.20958	0	0	0	0
Mcrip2	0	0	-1.94218	-1.04089	0	0	0	0	0	0	-1.51382	0	0	0	0	0	0	0	0	0	0	0	0	0
Mdk	0	0	-1.05525	0	0	0	0	0	0	0	0	0	0	0	0	0	0	0	-3.24009	0	0	0	0	0
Me3	0	0	0	0	0	0	0	0	0	0	-1.01836	0	0	0	0	0	0	0	0	0	0	0	0	0
Mecomos	0	0	0	0	0	0	0	-1.15855	0	0	0	0	0	-2.42772	0	0	0	0	0	0	0	0	0	0
Mef2c	0	0	0	0	0	0	0	-1.16501	0	0	0	0	0	0	0	0	0	0	0	0	0	0	0	0
Meis2	0	0	0	0	0	0	0	0	0	0	0	0	0	0	0	0	0	0	0	-1.04432	0	0	0	0
Meox2	0	0	0	0	0	0	0	0	0	0	0	0	0	0	0	0	0	0	0	0	0	0	0	-6.29264
Mep1a	-2.9776	0	-1.31772	0	0	0	-2.33499	0	-2.04549	0	-2.32214	0	0	0	0	0	-2.26924	0	-2.73746	0	-3.34147	0	0	0
Mep1b	0	0	-2.64365	0	0	0	0	0	0	0	0	0	0	0	0	0	0	0	0	0	0	0	0	0
Mertk	0	0	-1.38323	-1.12459	0	0	0	0	0	-1.28588	0	0	0	0	0	0	0	0	0	0	0	-1.19833	0	0
Mettl23	0	0	0	0	0	0	0	-1.08657	0	0	0	0	0	0	0	0	0	0	0	0	0	0	0	0
Mettl24	0	0	-1.02754	0	0	0	-1.27603	0	0	0	-1.58821	0	0	0	0	0	0	0	0	0	0	0	0	0
Mettl27	0	0	0	0	0	0	0	0	0	-1.79827	0	0	0	0	0	0	0	0	0	0	0	0	0	0
Mettl7b	0	0	-1.22833	0	0	0	0	0	-2.28606	0	0	0	0	0	0	0	0	0	0	0	0	0	0	0
Mfap3l	0	0	0	0	0	0	-1.04741	0	0	0	0	0	0	0	0	0	0	0	0	0	0	0	0	0
Mfsd2a	0	0	-1.5788	0	0	0	0	0	0	0	0	0	0	0	0	0	0	0	0	0	0	0	0	0
Mfsd4a	0	0	0	0	0	0	-1.6361	0	0	0	0	0	0	0	0	0	0	0	0	0	0	0	0	0
Mfsd4b5	0	0	0	0	0	0	0	0	-2.071	0	0	0	0	0	0	0	0	0	0	0	-2.40045	0	0	0
Mgam	0	0	-1.52835	0	0	0	-2.24589	0	-1.65185	-1.20552	-1.91226	0	0	0	0	0	0	0	0	0	0	0	0	0
Mgat3	-3.3362	0	-1.66453	0	0	0	0	0	0	0	0	0	-2.38457	0	0	0	0	0	0	0	0	0	0	0
Mgat4c	0	0	0	0	0	0	0	0	0	0	0	0	0	-1.76465	0	0	0	0	0	0	0	0	0	0
Mgll	0	0	-3.7722	-1.97644	0	0	-1.18106	-1.336	0	0	0	0	0	0	0	0	0	0	-1.66789	-1.56296	0	0	0	0
Mgst3	0	0	0	0	0	0	-1.35144	0	-1.42599	0	0	0	0	0	0	0	0	0	0	0	0	0	0	0
Mier3	0	0	0	0	0	0	0	0	0	0	0	0	-2.11169	-1.26065	0	0	0	0	0	0	0	0	0	0
Miga2	0	0	-1.28419	0	0	0	-1.29745	0	0	0	0	0	0	0	0	0	0	0	0	0	0	0	0	0
Mill2	0	0	0	0	0	0	0	0	0	0	0	0	0	0	0	0	0	0	0	0	0	-2.31161	0	0
Miox	-2.36656	0	-2.4697	-1.66109	-2.2954	-1.50836	-3.11496	-1.11634	-3.59843	-1.84676	-3.56373	-1.47208	-3.26064	0	-3.25649	0	-2.52224	0	-3.87702	-2.12074	-4.27617	-1.55684	0	0
Mir670hg	0	0	0	0	0	0	0	0	0	-2.2763	0	0	0	0	0	0	0	0	0	0	0	0	0	0
Mkln1os	0	0	0	0	0	0	0	-1.09918	0	0	0	0	0	-2.33521	0	0	0	0	0	0	0	0	0	0
Mn1	0	0	0	0	0	0	0	0	0	0	0	0	0	0	0	0	0	0	0	0	-3.81779	0	0	0
Mob2	0	0	0	0	0	0	0	0	-1.028	0	0	0	0	0	0	0	0	0	0	0	0	0	0	0
Mogat1	0	0	-1.7446	0	0	0	0	0	0	0	0	0	0	0	0	0	0	0	0	0	0	0	0	0
Mpp7	0	0	0	0	0	0	0	0	-1.19525	0	0	0	0	0	0	0	0	0	0	0	0	0	0	0
Mpped2	0	0	0	0	0	0	0	0	0	0	0	0	-1.18117	-1.49466	0	0	0	0	0	0	0	0	0	0
Mpv17l	0	0	0	0	0	0	0	0	-1.02008	0	0	0	0	0	0	0	0	0	0	0	0	0	0	0
Mreg	0	0	0	0	0	0	0	0	-2.55948	0	0	0	0	0	0	0	0	0	0	0	0	0	0	0
Mrnip	0	0	-1.42823	0	0	0	0	0	0	0	0	0	0	0	0	0	0	0	0	0	0	0	0	0
Mro	0	0	-1.08811	0	0	0	0	0	0	0	0	0	0	0	0	0	0	0	0	0	0	0	0	0
Mroh4	0	0	0	0	0	0	0	-2.18867	0	0	0	0	0	0	0	0	0	0	0	0	0	0	0	0
Mroh7	0	0	0	-1.02249	0	0	0	0	0	0	0	0	0	0	0	0	0	0	0	0	0	0	0	0
Mrvi1	0	0	0	0	0	0	0	0	0	0	0	0	0	0	0	0	0	0	0	0	0	-1.76988	0	0
Msmo1	0	0	-1.2189	0	0	0	-1.85349	0	0	0	0	0	0	0	0	0	0	0	0	0	0	0	0	0
Msrb2	0	0	-2.17169	0	0	0	-1.09854	0	0	0	0	0	0	0	0	0	0	0	-2.6743	0	0	0	0	0
mt-Atp6	0	0	-1.48719	0	0	0	-2.08574	0	-1.40184	0	0	0	-1.2569	0	-1.19904	0	-1.42328	0	-2.04185	0	-1.78257	0	0	0
mt-Atp8	-3.18095	0	-2.00161	0	0	0	-2.3958	0	-2.20845	0	0	0	0	0	0	0	0	0	0	0	0	0	0	0
mt-Co1	-1.33176	0	0	0	0	0	-1.31692	0	-1.03704	0	0	0	0	0	0	0	0	0	-1.57604	0	-1.95265	0	0	0
mt-Co2	-1.60732	0	-1.43807	0	0	0	-1.94502	0	-1.18759	0	0	0	-1.17089	0	-1.03467	0	-1.10352	0	-2.06898	0	-2.01965	0	0	0
mt-Co3	-1.70971	0	-1.1863	0	0	0	-1.73299	0	-1.31837	0	0	0	-1.02918	0	0	0	-1.00017	0	-1.79226	0	-2.19984	0	0	0
mt-Cytb	-2.265	0	-2.04481	0	-1.87153	0	-2.44977	0	-1.74233	0	-1.19023	0	-1.71048	0	-1.92708	0	-1.75176	0	-2.5968	0	-2.84351	0	0	0
mt-Nd1	0	0	-1.53981	0	0	0	-1.87063	0	-1.45513	0	-1.12441	0	-1.35985	0	0	0	-1.23132	0	-1.82755	0	-2.33861	0	0	0
mt-Nd2	-1.90479	0	-2.20423	0	-1.74307	0	-2.56265	0	-1.89961	0	-1.5819	0	-1.76424	0	-2.22832	0	-2.168	0	-2.62877	0	-2.71575	0	0	0
mt-Nd3	0	0	-2.67656	0	0	0	-3.38583	0	-2.55822	0	-2.7738	0	-3.77197	0	-2.88984	0	-3.01698	0	-3.32442	0	-4.27329	0	0	0
mt-Nd4	-1.77001	0	-1.86734	0	-1.90014	0	-2.26937	0	-1.96299	0	-1.40886	0	-1.79423	0	-1.80099	0	-1.64728	0	-2.43268	0	-2.55162	0	0	0
mt-Nd4l	0	0	-1.93454	0	0	0	-2.33887	0	-1.8262	0	-1.64991	0	0	0	-1.83169	0	-1.7643	0	-2.54254	0	-2.45205	0	0	0
mt-Nd5	-2.14048	0	-1.86455	0	0	0	-1.94766	0	-2.03329	0	-1.1225	0	-1.90142	0	0	0	-1.84448	0	-3.0946	0	-2.30308	0	0	0
mt-Nd6	0	0	-1.52935	0	-2.10984	0	-2.07662	0	-1.8818	0	0	0	-1.68767	0	0	0	-2.43139	0	0	0	0	0	0	0
Mthfd1	0	0	-1.4106	0	0	0	-1.22076	0	-1.42456	0	-1.60833	0	0	0	0	0	-2.10264	0	0	0	0	0	0	0
Mtmr10	0	0	-1.02355	0	0	0	0	0	0	0	0	0	0	0	0	0	0	0	0	0	0	0	0	0
Mtor	0	0	-1.05305	0	0	0	0	0	0	0	0	0	0	0	0	0	0	0	0	0	0	0	0	0
Mtss1	0	0	0	0	0	0	0	0	0	0	-1.03711	0	0	0	0	0	0	0	0	0	0	0	0	0
Mturn	0	0	0	-1.79818	0	0	0	0	0	0	0	0	0	0	0	0	0	0	0	0	0	0	0	0
Mtus1	0	0	-1.2549	0	0	0	0	0	0	0	0	0	0	0	0	0	0	0	0	0	0	0	0	0
Muc6	0	0	0	0	0	0	0	0	0	0	0	0	0	0	0	0	0	0	0	0	0	0	0	0
Mum1	0	0	-1.30965	0	0	0	0	0	0	0	0	0	0	0	0	0	0	0	0	0	0	0	0	0
Mxi1	0	0	0	0	0	0	0	0	0	-1.69008	0	0	0	0	0	0	0	0	0	0	0	0	0	0
Myh10	0	0	0	0	0	0	0	0	0	0	0	0	0	-1.13068	0	0	0	0	0	0	0	0	0	0
Myh14	0	0	0	0	0	0	0	0	0	0	0	0	0	0	0	0	0	0	0	0	0	0	-2.30467	0
Myl6b	0	0	0	0	0	0	0	0	0	0	0	0	0	0	0	0	0	0	0	0	0	0	0	0
Mylk	0	0	0	0	0	0	0	0	0	0	0	0	0	0	0	0	0	0	0	0	0	-1.15095	0	0
Myo1b	0	0	0	0	0	0	0	0	0	0	0	0	0	0	0	0	0	0	0	0	0	-1.36202	0	0
Myo3a	0	0	0	0	0	0	-1.78304	-1.53648	0	0	0	0	0	0	0	0	0	0	0	0	0	0	0	0
Myo3b	0	0	0	0	0	0	0	0	0	0	0	0	0	-1.2092	0	0	0	0	0	0	0	0	-2.44158	0
N4bp2	0	0	0	0	0	0	0	0	-1.08126	0	0	0	0	0	0	0	0	0	0	0	0	0	0	0
Nadk2	0	0	0	0	0	0	0	0	-1.01769	0	0	0	0	-1.10458	0	0	0	0	0	0	0	0	0	0
Napepld	0	0	0	0	0	0	0	0	0	0	0	0	0	0	0	-1.65009	0	0	0	0	0	0	-4.26739	0
Napsa	0	0	0	0	0	0	0	0	-1.05811	0	0	0	0	0	0	0	0	0	-1.55946	0	0	0	0	0
Narf	0	0	0	0	0	0	-1.0862	0	-1.23716	0	-1.17017	0	0	0	0	0	0	0	0	0	0	0	0	0
Nat8	0	0	0	-1.12032	0	0	0	0	0	0	0	0	0	0	0	0	0	0	0	0	0	0	0	0
Nat8f1	-2.63434	0	-3.47995	-2.54671	-3.41659	0	-3.20257	-1.68991	-3.40272	-1.47442	-3.19928	-1.57427	-3.21052	0	-3.40595	0	-2.29112	0	-4.85277	-2.47664	-5.37553	-1.91745	0	0
Nat8f3	0	0	-3.77697	-2.72684	-4.53076	0	0	0	0	0	0	0	-4.6357	0	0	0	0	0	-5.38523	0	0	0	0	0
Nat8f6	0	0	-4.10383	-3.37049	0	0	0	0	0	0	0	0	-4.76025	0	0	0	0	0	-3.71813	-3.4605	-6.18285	0	0	0
Nbl1	0	0	0	0	0	0	0	0	0	0	0	0	0	0	0	0	0	0	0	0	0	0	-3.14433	0
Ncald	0	0	0	0	0	0	0	0	0	0	0	0	0	0	0	0	0	0	-3.46589	-1.80209	0	0	0	0
Ncam2	0	0	-2.00738	-1.83112	0	0	0	0	0	0	0	0	-3.6042	0	-6.68905	0	0	0	0	0	0	0	0	0
Nckap5	0	0	0	0	0	0	-1.17755	0	0	0	0	0	-1.24528	-1.58606	0	0	0	0	0	0	0	0	0	0
Ncoa7	0	0	-1.02544	0	0	0	0	0	0	0	0	0	0	0	0	0	0	0	0	0	0	0	0	0
Ndrg4	0	0	0	0	-3.49068	-1.86799	0	0	0	0	0	0	0	0	0	0	0	0	0	0	0	0	0	0
Ndufa1	0	0	0	0	0	0	-1.22406	0	0	0	0	0	0	0	0	0	0	0	0	0	0	0	0	0
Ndufa12	0	0	0	0	0	0	-1.00219	0	0	0	0	0	0	0	0	0	0	0	0	0	0	0	0	0
Ndufa4	0	0	0	0	0	0	-1.37139	0	0	0	0	0	0	0	0	0	0	0	-1.86043	0	0	0	0	0
Ndufa5	0	0	0	0	0	0	-1.26859	0	0	0	0	0	0	0	0	0	0	0	0	0	0	0	0	0
Ndufb10	0	0	0	0	0	0	-1.13147	0	0	0	0	0	0	0	0	0	0	0	0	0	0	0	0	0
Ndufb9	0	0	0	0	0	0	-1.31834	0	0	0	0	0	0	0	0	0	0	0	0	0	0	0	0	0
Ndufs6	0	0	0	0	0	0	0	0	-1.13385	0	0	0	0	0	0	0	0	0	0	0	0	0	0	0
Ndufs7	0	0	0	0	0	0	-1.01586	0	0	0	0	0	0	0	0	0	0	0	0	0	0	0	0	0
Ndufs8	0	0	0	0	0	0	-1.12409	0	0	0	0	0	0	0	0	0	0	0	0	0	0	0	0	0
Ndufv1	0	0	0	0	0	0	-1.14488	0	0	0	0	0	0	0	0	0	0	0	0	0	0	0	0	0
Ndufv3	0	0	0	0	0	0	0	0	0	0	0	0	0	0	0	0	0	0	0	0	-1.82407	0	0	0
Nedd4l	0	0	0	0	0	0	0	0	0	0	0	0	0	-1.26941	0	0	0	0	0	0	0	0	0	0
Negr1	0	0	0	0	0	0	0	0	0	0	0	0	0	0	0	-2.27807	0	0	0	0	0	0	0	0
Nepn	0	0	-4.72106	0	0	0	0	0	0	0	0	0	0	0	0	0	0	0	0	0	0	0	0	0
Neu2	0	0	0	-1.59984	0	0	0	-1.10718	0	-1.50948	0	0	0	-2.31545	0	-2.51504	0	0	0	0	0	0	0	0
Neurl4	0	0	0	0	0	0	0	0	0	0	0	0	0	-1.27804	0	0	0	0	0	0	0	0	0	0
Nfatc2	0	0	0	0	0	0	0	0	0	-1.19938	0	0	0	0	0	0	0	0	0	0	0	0	0	0
Nfic	0	0	0	0	0	0	0	0	0	0	0	0	0	0	0	0	-1.08699	0	0	0	0	0	0	0
Nfyc	0	0	0	0	0	0	0	0	0	0	0	0	0	0	0	0	-1.14555	0	0	0	0	0	0	0
Ngef	0	0	-1.37089	-1.33311	0	0	0	0	0	0	-1.10462	0	0	0	0	0	-1.05268	0	0	0	0	0	0	0
Nhsl1	0	0	0	0	0	0	0	0	0	0	0	0	0	0	0	0	0	0	0	0	0	-1.59835	0	0
Nhsl2	0	0	-1.04411	0	0	0	0	0	-1.95805	0	0	0	0	0	0	0	0	0	0	0	0	0	0	0
Nid2	0	0	-1.03788	0	0	0	0	0	0	0	0	0	0	0	0	0	0	0	0	0	0	0	0	0
Nipsnap1	0	0	-1.2975	0	0	0	0	0	0	0	0	0	0	0	0	0	0	0	0	0	0	0	0	0
Nkain1	0	0	-3.43184	0	0	0	0	0	0	0	0	0	0	0	0	0	0	0	0	0	0	0	0	0
Nkain3	0	0	0	0	0	0	0	0	0	0	0	0	0	0	-3.59241	0	0	0	0	0	0	0	0	0
Nkap	0	0	0	0	0	0	0	0	0	0	0	0	0	0	0	-1.69976	0	-1.9978	0	0	0	0	0	0
Nkapl	0	0	0	0	0	0	0	0	0	0	0	0	-3.08753	0	0	0	0	0	0	0	0	0	0	0
Nkd1	0	0	0	0	0	0	0	0	0	0	0	0	0	0	0	0	0	0	0	0	0	-1.16574	0	0
Nlk	0	-1.20441	0	0	0	0	0	0	0	0	0	0	0	0	0	0	0	0	0	0	0	0	0	0
Nlrp6	0	0	-2.43355	-1.47937	0	0	0	0	0	0	0	0	0	0	0	0	0	0	0	0	0	0	0	0
Nme7	0	0	0	0	0	-1.24231	0	0	0	0	0	0	0	0	0	0	0	0	0	0	0	0	0	0
Nmrk1	0	0	-1.17217	0	0	0	0	0	0	0	0	0	0	0	0	0	0	0	0	0	0	0	0	0
Nol4	0	0	0	-1.93775	0	0	0	0	0	0	0	0	0	0	0	0	0	0	0	0	0	0	0	0
Nos1ap	0	0	-1.2067	0	0	0	0	0	0	0	0	0	0	0	0	0	0	0	0	0	0	0	0	0
Notch3	0	0	0	0	0	0	0	-1.54542	0	0	0	0	0	0	0	0	0	0	0	0	0	0	0	0
Notum	0	0	-2.97741	-2.75296	0	0	0	0	0	0	0	0	0	0	0	0	0	0	0	0	0	0	0	0
Nox4	0	0	-2.36666	-1.44577	0	0	0	0	-1.75395	0	-2.25085	0	-2.51357	0	-1.78863	0	0	0	-2.71363	0	-2.95509	0	0	0
Npas3	0	0	0	0	-4.3595	0	0	0	0	0	0	0	0	0	0	0	0	0	0	0	0	0	0	0
Nphs1	0	-1.10906	0	0	0	0	0	0	0	0	0	0	0	0	0	0	0	0	0	0	0	0	0	0
Npr3	0	0	0	0	0	0	0	0	0	0	0	0	0	0	0	0	0	0	-5.23268	-4.66457	0	0	0	0
Npy	0	0	0	0	0	0	0	-2.60223	0	0	0	0	0	-1.71926	0	0	0	0	0	0	0	0	0	0
Nr1d1	0	0	-1.3606	-1.08223	0	0	-1.73386	0	-2.42815	0	-3.01326	0	-1.47675	0	0	0	0	0	-2.67473	-2.37657	0	0	0	0
Nr1d2	0	0	0	0	0	0	-1.25329	-1.11114	0	-1.18831	-1.00898	-1.06592	0	0	0	-1.30931	0	0	0	-1.11553	0	0	0	0
Nr2e3	0	0	0	0	-7.48874	0	0	0	0	0	0	0	0	0	0	0	0	0	0	0	0	0	0	0
Nr3c1	0	0	0	0	0	0	0	0	0	0	0	0	0	0	0	0	0	0	0	0	0	-1.05838	0	0
Nr6a1os	0	0	0	0	0	0	0	0	0	0	0	0	0	-1.23351	0	0	0	0	0	0	0	0	0	0
Nrarp	0	0	0	0	0	0	0	0	0	0	0	0	-3.49651	0	0	0	0	0	0	0	0	0	0	0
Nrg4	0	0	0	0	0	0	0	0	0	0	0	0	0	0	0	0	0	0	0	0	0	0	0	0
Nrp1	0	0	0	0	0	0	0	0	0	0	0	0	0	0	0	0	0	0	-2.16446	-1.62647	-1.84488	-1.35689	0	0
Nrxn2	0	0	0	0	0	0	0	0	0	0	0	0	0	0	0	0	0	0	0	0	0	-2.48281	0	0
Nrxn3	0	0	0	0	0	0	0	0	0	0	0	0	0	0	0	0	0	0	0	0	0	-2.90978	0	0
Nsdhl	0	0	-1.65811	0	0	0	0	0	0	0	0	0	0	0	0	0	0	0	-2.37559	0	0	0	0	0
Nsg2	0	0	0	0	-2.76734	0	0	0	0	0	0	0	0	0	0	0	0	0	0	0	0	0	0	0
Nt5c1a	0	0	0	0	0	0	0	0	0	0	0	0	0	0	0	0	0	0	0	0	0	0	0	0
Nt5e	0	0	0	0	0	0	0	0	0	0	0	0	0	0	0	0	0	0	0	0	0	-1.55171	0	0
Ntf3	0	0	0	0	0	0	0	0	0	0	0	0	0	0	0	0	0	0	-3.4694	-2.36593	0	-1.76586	0	0
Nuak1	0	0	0	0	0	0	0	0	0	0	0	0	0	0	0	0	0	0	0	-1.62029	0	0	0	0
Nubpl	0	0	0	0	0	0	0	0	-1.05355	0	0	0	0	0	0	0	0	0	0	0	0	0	0	0
Nudt19	0	0	0	0	0	0	0	0	0	0	0	0	0	0	0	0	0	0	-1.71342	0	0	0	0	0
Nup93	0	0	0	0	0	0	0	0	-1.35828	0	0	0	0	0	0	0	0	0	0	0	0	0	0	0
Nus1	0	0	-1.2703	0	0	0	0	0	0	0	0	0	0	0	0	0	0	0	0	0	0	0	0	0
Nxpe3	0	0	-1.49581	-1.06914	0	0	0	0	0	0	0	0	0	0	0	0	0	0	0	0	0	0	0	0
Nxph1	0	0	-4.11481	-5.99651	0	0	0	0	0	0	0	0	0	0	0	0	0	0	0	0	0	0	0	0
Odc1	0	0	0	0	0	0	0	0	-1.10599	0	0	0	-1.49666	0	0	0	0	0	0	0	0	0	0	0
Ogfod2	0	0	0	0	0	0	0	0	0	0	0	0	0	0	0	0	0	0	0	0	0	0	-3.29413	0
Olfm4	0	0	-2.79033	-1.61645	0	0	0	0	0	0	0	0	0	0	0	0	0	0	0	0	0	0	0	0
Olfml1	0	0	-1.46715	0	0	0	0	0	0	0	0	0	0	0	0	0	0	0	0	0	0	0	0	0
Oprm1	0	0	0	0	0	0	-1.19139	-1.38464	0	0	0	-1.48774	0	-2.80177	0	0	0	0	0	0	0	0	0	0
Osbp2	0	0	0	0	0	0	0	0	-1.69307	0	0	0	0	0	0	0	0	0	0	0	0	0	0	0
Osbpl1a	0	0	0	0	0	0	0	0	0	0	0	0	0	-1.13525	0	0	0	0	0	0	0	0	0	0
Osbpl2	0	0	0	0	0	0	0	0	0	0	-1.19875	0	0	0	0	0	0	0	0	0	0	0	0	0
Oxct1	0	0	-1.41001	0	0	0	-1.2882	0	-1.32853	0	-1.21476	0	0	0	-1.20244	0	0	0	-2.0902	0	0	0	0	0
Oxr1	0	0	0	0	0	0	0	0	0	0	0	0	0	0	0	0	0	0	0	0	0	0	0	0
Oxsm	0	0	0	0	0	0	-1.3056	0	0	0	0	0	0	0	0	0	0	0	0	0	0	0	0	0
P3h2	0	0	-1.68578	-1.01023	0	0	-1.46101	0	0	0	-1.14431	0	-1.85846	0	0	0	0	0	0	0	0	0	0	0
Pacsin2	0	0	0	0	0	0	0	0	-1.36038	0	0	0	0	0	0	0	0	0	0	0	0	0	0	0
Pag1	0	0	-1.36108	0	0	0	0	0	0	0	0	0	0	0	0	0	0	0	0	0	0	-1.64628	0	0
Pah	0	0	-2.50174	-1.40253	0	0	-3.05555	-1.06541	-3.34951	0	-3.19136	0	-2.81141	0	-2.76211	0	0	0	-4.33564	0	-3.95884	0	0	0
Pamr1	0	0	0	0	0	0	0	0	-1.54484	-1.34143	0	0	0	0	0	0	0	0	0	0	0	0	0	0
Pank1	0	0	-1.51323	0	-2.67901	0	-1.00686	0	-1.12704	0	-1.45059	0	-1.43777	0	0	0	-1.8214	0	-2.30658	0	0	0	0	0
Pantr1	0	0	-1.2351	0	0	0	0	-1.06502	0	0	0	0	0	-2.20709	0	0	0	0	0	0	0	0	0	0
Papss1	0	0	0	0	0	0	0	0	-1.84279	0	-1.47442	0	0	0	0	0	0	0	0	0	0	0	0	0
Papss2	0	0	-1.89686	-1.15798	0	0	-1.63051	0	-2.00199	0	-1.76698	0	-3.02232	0	0	0	0	0	-2.12711	0	0	0	0	0
Paqr7	0	0	-2.06876	-1.64259	0	0	0	0	0	0	0	0	0	0	0	0	0	0	0	0	0	0	0	0
Paqr9	0	0	-1.93667	0	0	0	0	0	0	0	0	0	0	0	0	0	0	0	0	0	0	0	0	0
Pard3bos1	0	0	0	0	0	0	0	-1.25151	0	0	0	0	0	-2.07025	0	0	0	0	0	0	0	0	0	0
Park2	0	0	0	0	0	0	0	0	0	0	0	0	0	0	0	0	0	0	0	0	0	-1.44271	0	0
Pax2	0	0	0	0	-1.53314	0	0	0	0	0	0	0	0	-1.04155	0	0	0	0	0	0	0	0	0	0
Pbld1	0	0	-2.08437	-1.38052	0	0	-1.87475	0	-1.55105	0	-1.74688	0	0	0	0	0	0	0	-2.49732	0	0	0	0	0
Pbld2	0	0	-1.6245	0	0	0	0	0	-2.03951	0	0	0	0	0	0	0	0	0	0	0	0	0	0	0
Pbx1	0	0	0	0	0	0	0	0	0	0	0	0	0	0	0	0	0	0	-1.59622	-1.0837	0	0	0	0
Pcbd1	0	0	-1.15479	0	0	0	-1.36385	0	-1.81404	0	0	0	0	0	0	0	0	0	-2.39216	0	0	0	0	0
Pcbp3	0	0	0	0	0	0	0	0	0	0	0	0	0	-1.0201	0	0	0	0	0	0	0	0	0	0
Pcdh12	0	0	0	0	0	0	0	0	0	0	0	0	0	0	0	0	0	0	0	0	0	-2.88949	0	0
Pcdh17	0	0	0	0	0	0	0	0	0	0	0	0	0	0	0	0	0	0	0	0	0	0	0	0
Pck1	-2.88033	0	-2.05948	-2.2529	-3.53609	0	-2.15556	-1.02098	-2.00627	0	-3.14813	0	-3.0061	0	0	0	-1.8971	0	-3.55192	-1.6545	-4.33162	0	0	0
Pclo	0	0	0	0	0	0	0	0	0	0	0	0	0	0	-2.07671	0	-1.54248	-1.06945	0	0	0	0	0	0
Pcsk6	0	0	0	0	0	0	-1.47383	0	0	0	0	0	0	0	0	0	0	0	0	0	0	0	0	0
Pcx	0	0	-1.76793	0	0	-1.65687	-1.53317	-1.10063	-1.93758	0	-1.8534	0	-2.43109	-1.10441	0	0	0	0	0	0	0	0	-2.96146	0
Pcyt2	0	0	0	0	0	0	-1.5152	0	0	0	0	0	0	0	0	0	-2.21317	0	0	0	0	0	0	0
Pdcd4	0	0	0	0	0	-1.04768	0	0	0	-1.85216	0	-1.6441	0	-1.72455	0	0	0	0	0	0	0	-1.20275	0	0
Pde11a	0	0	0	0	0	0	0	0	0	0	0	0	0	0	0	0	0	0	0	0	0	-1.72826	0	0
Pde3a	0	0	0	0	-4.47421	0	0	0	0	0	0	0	0	0	0	0	0	0	0	0	0	-1.0145	0	0
Pde4b	0	0	0	0	0	0	0	0	0	0	0	0	0	0	-1.92997	0	-1.56212	0	0	0	0	0	0	0
Pde4d	0	0	-1.19517	0	0	0	0	0	0	0	0	0	0	0	0	0	0	0	0	0	0	0	0	0
Pde6a	0	0	-3.3619	0	0	0	-1.42691	0	0	0	0	0	0	0	0	0	0	0	0	0	0	0	0	0
Pde7b	0	0	0	0	0	0	0	0	-1.87062	-1.13035	0	0	0	0	0	0	0	0	0	0	0	-1.40466	0	0
Pde8b	0	0	0	0	0	0	0	0	0	0	0	0	0	0	0	0	0	0	0	0	0	-1.87113	0	0
Pdgfc	0	0	0	0	0	0	0	-1.16856	-1.03879	-1.08561	0	0	0	0	0	0	0	0	0	0	0	0	0	0
Pdia5	0	0	0	0	0	0	0	0	0	0	0	0	0	0	0	0	0	0	0	-1.42047	0	0	0	0
Pdk1	0	0	0	0	0	0	-1.21385	0	0	0	-1.52109	0	0	0	0	0	0	0	0	0	0	0	0	0
Pdk2	0	0	-1.52955	-1.0493	0	0	-1.25699	0	-1.16908	0	0	0	0	0	0	0	0	0	-3.05991	0	-3.23656	0	0	0
Pdlim1	0	0	0	0	0	0	0	0	-1.59059	0	0	0	0	0	0	0	0	0	0	0	0	0	0	0
Pdzd2	0	0	-2.00291	0	0	0	0	0	0	0	0	0	0	0	0	0	0	0	0	0	0	-1.02251	0	0
Pdzk1	0	0	-1.93079	0	0	0	-2.07705	0	-2.02215	0	-2.1523	0	0	0	0	0	0	0	-3.17154	0	0	0	0	0
Pdzrn3	0	0	0	0	0	0	0	0	-3.70196	-1.72759	-1.47518	0	0	0	0	0	0	0	0	0	0	0	0	0
Pdzrn4	0	0	0	0	0	0	-2.0992	-1.71366	0	0	0	0	0	0	0	0	0	0	0	0	0	0	0	0
Peak1	-1.58785	0	0	0	0	0	0	0	0	0	0	0	0	0	0	0	0	0	0	0	0	0	0	0
Pear1	0	0	0	0	0	0	0	0	0	0	0	0	0	0	0	-2.70746	0	-1.70184	0	0	0	-1.14777	0	0
Pecr	0	0	-1.78912	0	0	0	-2.08488	0	-2.16802	0	-2.50493	0	0	0	0	0	0	0	-2.31493	0	-2.96251	0	0	0
Peg3	0	0	0	0	0	0	0	0	0	0	0	0	0	-1.65903	0	0	0	0	0	-1.79056	-1.53692	-1.63076	0	0
Peli2	0	0	-1.38507	-1.10154	0	-1.30301	0	0	0	0	-1.44975	-1.05822	-1.34628	-1.77375	0	-1.52593	0	0	0	0	0	0	0	0
Per2	0	0	0	0	0	0	-1.01805	-1.26312	0	0	0	-1.35169	0	-2.02972	0	0	0	0	0	0	0	0	0	0
Perm1	0	0	0	0	0	0	0	0	-3.17389	0	0	0	0	0	0	0	0	0	0	0	0	0	0	0
Pes1	0	0	0	0	0	0	0	-1.00374	0	0	0	0	0	0	0	0	0	0	0	0	0	0	0	0
Pex5l	0	0	0	0	0	0	-3.09384	-1.49322	0	0	0	0	0	0	0	0	0	0	0	0	0	0	0	0
Pfkm	0	0	0	0	0	0	-1.10659	0	0	0	0	0	0	0	0	0	-2.64532	0	0	0	0	0	0	0
Pgam2	0	0	0	0	0	0	0	0	-1.76235	0	-1.10399	0	0	0	0	0	0	0	0	0	-4.63858	0	0	0
Pgap1	0	0	0	0	0	0	0	0	0	0	0	0	0	-1.06388	0	0	0	0	0	0	0	0	0	0
Pgm2	0	0	-1.03649	0	0	0	0	0	0	0	0	0	0	0	0	0	0	0	0	0	0	0	0	0
Pgpep1l	0	0	-2.37528	0	0	0	0	0	0	0	0	0	0	0	0	0	0	0	0	0	0	0	0	0
Pgrmc2	0	0	0	0	0	0	0	0	-1.60105	0	0	0	0	0	0	0	0	0	0	0	0	0	0	0
Phactr1	0	0	0	0	0	0	0	0	0	0	0	0	0	-1.40713	0	0	0	0	0	0	0	0	0	0
Phf2	0	0	0	0	0	0	0	0	-1.84012	0	0	0	0	0	0	0	0	0	0	0	0	0	0	0
Phkg1	0	0	0	0	0	0	0	0	0	0	0	0	-2.48286	0	0	0	0	0	0	0	0	0	0	0
Phlda2	0	0	-1.20537	0	0	0	0	0	0	0	0	0	0	0	0	0	0	0	0	0	0	0	0	0
Phldb2	0	0	0	0	0	0	0	0	0	0	0	0	-1.16929	0	0	0	0	0	0	0	0	0	0	0
Phtf2	0	0	-1.21091	-1.11752	0	0	0	0	0	0	0	0	0	0	0	0	0	0	0	0	0	0	0	0
Phyhipl	0	0	-2.06158	-1.79305	0	0	-1.04697	0	0	0	0	0	-1.80389	0	0	0	0	0	0	0	0	0	0	0
Phykpl	0	0	0	0	0	-1.54847	0	0	0	0	0	0	0	-1.40178	0	0	0	0	0	0	0	0	0	0
Pi15	0	0	0	0	0	0	0	0	0	0	0	0	0	0	0	0	0	0	0	0	0	-2.25887	0	0
Pi4k2b	0	0	0	0	0	0	0	0	0	0	0	0	-1.52175	-1.19457	0	0	0	0	0	0	0	0	0	0
Pid1	0	0	0	0	0	-2.82032	0	0	0	0	0	0	0	0	0	0	0	0	0	0	0	0	0	0
Piga	0	0	0	0	0	0	0	0	-2.24563	0	0	0	0	0	0	0	0	0	0	0	0	0	0	0
Pik3c2g	0	0	-2.50478	-1.6221	0	0	0	0	-1.5453	0	-2.07089	0	0	-1.18992	0	0	0	0	0	0	0	0	0	0
Pink1	0	0	0	0	0	0	-1.18253	0	-1.31027	0	0	0	0	0	0	0	0	0	-2.08291	0	0	0	0	0
Pipox	0	0	0	0	0	0	0	0	0	0	-1.83793	0	0	0	0	0	0	0	0	0	0	0	0	0
Pitpnc1	0	0	0	0	0	0	0	0	0	0	0	0	0	0	-1.07744	-1.0228	0	0	0	0	0	0	0	0
Pitx1	0	0	0	0	0	0	0	0	0	0	0	0	0	0	0	0	0	0	0	0	0	0	0	0
Pkd1l3	0	0	0	0	0	0	0	0	0	0	0	0	0	-1.91859	0	0	0	0	0	0	0	0	0	0
Pkd2l2	0	0	-1.10299	0	0	0	0	0	0	0	0	0	0	0	0	0	0	0	0	0	0	0	0	0
Pklr	0	0	0	0	0	0	0	0	0	0	0	0	0	0	0	0	0	0	-3.83505	0	0	0	0	0
Pkn2	0	0	0	0	0	0	0	0	0	0	0	0	0	0	0	0	-1.17872	0	0	0	0	0	0	0
Pla1a	0	0	0	0	0	0	-1.03478	0	0	0	0	0	0	0	0	0	0	0	0	0	0	0	0	0
Pla2g5	0	0	0	0	-4.51406	0	0	0	0	0	0	0	0	0	0	0	0	0	0	0	0	0	0	0
Pla2r1	0	0	0	0	0	0	0	0	0	0	0	0	0	0	0	0	0	0	0	0	0	-1.57757	0	0
Plcb1	0	0	-1.09143	0	0	0	0	0	0	0	0	0	0	0	0	0	0	0	0	0	0	0	0	0
Plcd3	0	0	0	0	0	0	0	0	0	0	0	0	0	-1.3081	0	0	0	0	0	0	0	0	0	0
Plcl1	0	0	0	0	0	0	0	0	0	0	0	0	0	0	0	0	0	0	0	0	0	-1.04787	0	0
Pld1	0	0	0	0	0	0	-1.07916	0	0	0	0	0	0	0	0	0	0	0	0	0	0	0	0	0
Plekha1	0	0	0	0	0	0	0	0	0	0	-1.33516	-1.11011	0	0	0	0	0	0	0	0	0	0	0	0
Plekha6	0	0	-1.85018	0	0	0	-1.89068	-1.18917	-1.31828	0	0	0	0	0	0	0	0	0	-3.20015	0	0	0	0	0
Plekha7	0	0	-1.11105	0	0	0	0	0	0	0	-1.05442	0	0	0	0	0	0	0	0	0	0	0	0	0
Plekhd1	0	0	0	0	0	0	0	0	0	0	-1.17561	0	-2.95679	0	0	0	-1.2521	0	0	0	0	0	0	0
Plk5	0	0	0	0	0	-4.92016	0	0	0	0	0	0	0	0	0	0	0	0	0	0	0	0	0	0
Plpp1	0	0	0	0	0	0	0	0	0	0	0	0	0	0	0	0	0	0	-1.09769	-1.13558	0	0	0	0
Plpp3	0	0	0	0	0	0	0	0	0	0	0	0	0	0	0	0	0	0	0	-1.08633	0	0	0	0
Plpp4	0	0	0	0	-2.99713	0	0	0	0	0	0	0	0	0	0	0	0	0	0	0	0	0	0	0
Plppr1	0	0	0	0	0	0	0	0	0	0	0	-1.21581	0	0	-2.38262	0	0	0	0	0	0	0	0	0
Plscr4	0	0	-1.29473	-1.5225	0	0	0	0	0	0	0	0	0	0	0	0	0	0	0	-1.18269	0	0	0	0
Plxna2	0	0	0	0	0	0	0	0	0	0	0	0	0	0	0	0	0	0	0	0	0	-1.54342	0	0
Plxna4	0	0	0	0	0	0	0	0	-3.0422	0	0	0	0	-1.72159	0	0	0	0	0	0	0	0	0	0
Pm20d1	0	0	-2.35339	-1.39996	0	0	0	0	0	0	-1.41285	0	0	0	0	0	-2.12823	0	0	0	0	0	0	0
Podn	0	0	-1.00864	0	0	0	0	0	0	0	0	0	0	0	0	0	0	0	0	0	0	0	0	0
Poli	0	0	-1.03725	0	0	0	0	0	0	0	0	0	0	0	0	0	0	0	0	0	0	0	0	0
Polr3gl	0	0	-1.00307	0	0	0	0	0	0	0	0	0	0	0	0	0	0	0	0	0	0	0	0	0
Por	0	0	-1.36613	0	0	0	0	0	0	0	0	0	0	0	0	0	0	0	0	0	0	0	0	0
Ppara	0	0	-1.00375	-1.70564	0	0	0	0	-1.32391	0	-2.29105	0	0	0	0	0	-1.37738	0	0	0	0	0	0	0
Ppargc1a	0	0	0	0	0	0	0	0	0	0	0	0	-1.37679	0	0	0	0	0	0	0	0	0	0	0
Ppargc1b	0	0	-1.42947	0	0	0	-1.62209	0	-1.34504	0	-1.47787	0	0	0	0	0	-1.2446	0	0	0	0	0	0	0
Ppat	0	0	0	0	0	0	0	0	-1.12228	0	0	0	0	0	0	0	0	0	0	0	0	0	0	0
Ppfibp2	0	0	-1.86447	0	0	0	0	0	0	0	0	0	0	0	0	0	0	0	0	0	0	0	0	0
Ppic	0	0	-1.04728	0	0	0	0	0	0	0	0	0	0	0	0	0	0	0	0	0	0	0	0	0
Ppil6	0	0	0	0	0	0	0	0	0	0	-1.44639	0	0	0	0	0	0	0	0	0	0	0	0	0
Ppm1e	0	0	0	0	0	0	0	0	0	0	0	0	0	0	0	0	0	0	0	-1.18842	0	0	0	0
Ppm1k	0	0	-1.75475	-1.58213	0	0	0	0	0	0	0	0	0	-1.17753	0	0	0	0	0	0	0	0	0	0
Ppm1l	0	0	-1.6313	0	0	0	0	0	0	0	-1.133	0	0	0	0	0	0	0	0	0	0	0	0	0
Ppp1r16b	0	0	0	0	0	0	0	0	0	0	0	0	-2.40115	0	0	0	0	0	0	0	0	0	0	0
Ppp1r1a	0	0	0	0	0	-1.93027	-1.80924	0	-2.54056	-1.16821	-2.24427	0	0	0	0	0	0	0	-2.90096	0	0	0	0	0
Ppp1r1b	0	0	0	0	-3.81688	0	-1.6923	0	0	0	0	0	0	0	0	0	0	0	0	0	0	0	0	0
Ppp1r3c	0	0	0	0	0	0	0	0	0	0	0	0	0	0	0	0	0	0	0	0	0	0	-6.66447	0
Ppp1r9a	0	0	0	0	0	0	0	0	0	0	0	0	0	-1.03137	0	0	0	0	0	0	0	0	0	0
Ppp2r2b	0	0	0	0	0	0	-1.1977	0	0	0	-1.45787	0	-2.39672	-2.0023	0	0	0	0	0	0	0	0	0	0
Ppt2	0	0	0	0	0	0	0	0	0	0	0	0	0	0	0	0	0	0	0	0	0	0	-3.42071	0
Pptc7	0	0	0	0	0	0	0	0	-1.00804	0	-1.13364	0	0	0	0	0	0	0	0	0	0	0	0	0
Pqlc2	0	0	0	-1.19767	0	0	0	0	0	0	0	0	0	0	0	0	0	0	0	0	0	0	0	0
Prag1	0	0	-1.01366	0	0	0	0	0	0	0	0	0	0	0	0	0	0	0	0	0	0	0	0	0
Prelp	0	0	0	0	0	0	0	0	0	0	0	0	0	0	0	0	0	0	-4.76821	0	-2.40834	0	0	0
Prex2	0	0	-3.48918	0	0	0	0	0	0	0	0	0	-2.35196	0	0	0	0	0	0	0	0	-1.2717	0	0
Prickle1	0	0	-1.11824	0	0	0	-1.01723	0	-1.1484	0	0	0	0	0	0	0	0	0	0	0	0	0	0	0
Prickle2	0	0	0	0	0	0	0	0	0	0	0	0	0	0	0	0	0	0	0	-1.3285	0	0	0	0
Prima1	0	0	-1.68295	0	0	0	0	0	0	0	0	0	0	0	0	0	0	0	0	0	0	0	0	0
Prkag2	0	0	-1.09158	0	0	0	0	0	0	0	0	0	0	0	0	0	0	0	0	0	0	0	0	0
Prkar2a	0	0	0	0	0	0	0	0	0	0	-1.05411	0	0	0	0	0	0	0	0	0	0	0	0	0
Prkca	0	0	0	0	0	0	0	0	0	0	0	0	0	0	0	0	-1.3528	0	0	0	0	0	0	0
Prkce	-1.46078	0	0	0	0	0	0	0	-1.00375	0	0	0	0	0	0	0	0	0	0	0	0	0	0	0
Prkcz	0	0	-1.2202	0	0	0	0	0	0	0	0	0	0	0	0	0	0	0	0	0	0	0	0	0
Prkd1	0	0	0	0	0	0	-1.60295	-1.25936	-3.1309	-1.76503	0	0	0	-1.44219	0	0	0	0	0	-1.68431	0	0	0	0
Prkg1	0	-1.05319	0	0	0	0	0	0	0	0	0	0	0	0	0	0	0	0	0	0	0	-1.36265	0	0
Prlr	0	0	-4.50153	-2.50223	0	0	0	0	0	0	0	0	0	0	0	0	-2.17356	0	0	0	0	0	0	0
Prmt3	0	0	0	0	0	0	-1.11493	0	0	0	0	0	0	0	0	0	0	0	0	0	0	0	0	0
Proc	-2.66535	0	0	0	0	0	0	0	0	0	0	0	0	0	0	0	0	0	0	0	0	0	0	0
Prodh	0	0	0	-1.03147	0	0	0	0	0	0	0	0	0	0	0	0	0	0	0	0	0	0	0	0
Prodh2	0	0	-2.44168	-1.64059	0	0	0	0	0	0	0	0	-5.25642	0	0	0	0	0	0	0	0	0	0	0
Prom1	0	0	-1.09636	0	0	0	0	0	0	0	0	0	0	0	0	0	0	0	0	0	0	0	0	0
Prom2	0	0	0	0	0	0	-1.05516	0	0	0	0	0	0	0	0	0	0	0	0	0	0	0	0	0
Prox1	0	0	0	0	0	0	-1.46306	-1.09107	-1.738	-1.00109	0	0	0	0	0	0	0	0	0	0	0	0	0	0
Prox1os	0	0	0	0	0	0	-1.97676	-1.27639	0	0	0	0	0	0	0	0	0	0	0	0	0	0	0	0
Prps2	0	0	0	0	0	0	-1.16796	0	-1.26787	0	0	0	0	0	0	0	0	0	0	0	0	0	0	0
Prpsap1	0	0	0	0	0	0	0	0	0	0	0	0	0	0	0	0	0	0	0	0	0	-1.14216	0	0
Prrg1	0	0	0	0	0	0	0	0	0	0	0	0	0	-1.06405	0	0	0	0	0	0	0	0	0	0
Prss35	0	0	0	0	0	0	0	0	0	0	0	0	0	0	0	0	0	0	0	0	0	0	-6.22465	-6.38683
Prss8	0	0	-1.31505	0	0	0	0	0	0	0	0	0	0	0	0	0	0	0	0	0	0	0	0	0
Psd3	0	0	0	0	0	0	0	0	0	0	0	0	0	0	0	0	0	0	0	0	0	-1.03601	0	0
Ptgds	0	0	0	0	0	0	-2.06232	-1.36044	0	0	0	0	0	0	0	0	0	0	0	0	0	0	0	0
Ptger2	0	0	0	0	-5.34831	0	0	0	0	0	0	0	0	0	0	0	0	0	0	0	0	0	0	0
Ptger3	0	0	0	0	0	0	-1.79243	0	0	0	0	0	0	0	0	0	0	0	0	0	0	0	-4.55155	0
Ptgs1	0	0	0	0	0	0	0	0	-1.62881	-2.69641	0	0	0	0	0	0	0	0	0	0	0	0	0	0
Pth1r	-1.12964	0	0	0	0	0	0	0	0	0	0	0	0	0	0	0	0	0	-2.10888	0	0	0	0	0
Ptpn21	0	0	0	0	0	0	0	0	0	0	0	0	0	0	0	-1.08253	0	0	0	0	0	0	0	0
Ptprd	0	0	-1.51913	-1.1605	0	0	0	0	0	0	-1.07377	0	-1.79501	0	0	0	-1.5495	0	0	0	0	-1.0329	0	0
Ptprr	0	0	0	0	0	0	0	0	0	0	0	0	0	-4.21396	0	0	0	0	0	0	0	0	0	0
Ptprs	0	0	0	0	0	0	0	0	0	0	-1.26888	-1.31245	0	0	0	0	0	0	0	0	0	0	0	0
Ptpru	0	0	0	0	0	0	0	0	0	0	0	0	0	0	0	0	0	0	-2.62153	-1.7591	0	0	0	0
Pvalb	0	0	0	0	0	0	0	0	-8.93491	-2.47292	0	-1.42407	0	0	0	0	0	0	0	0	0	0	0	0
Pxmp2	0	0	-1.99188	-1.59284	-3.27158	0	-1.08726	0	-1.60536	0	-2.51536	0	-2.42627	0	0	0	0	0	0	0	0	-3.19949	0	0
Pxylp1	0	0	-1.31109	0	0	0	0	0	0	0	0	0	0	0	0	0	0	0	0	0	0	0	0	0
Pygl	0	0	0	0	0	0	-1.14444	0	-1.20839	0	0	0	0	0	0	0	0	0	0	0	0	0	0	0
Qdpr	0	0	-1.12032	0	0	0	0	0	0	0	0	0	0	0	0	0	0	0	0	0	0	0	0	0
R3hdml	0	0	-1.96829	0	0	0	0	0	0	0	0	0	0	0	0	0	0	0	0	0	0	0	0	0
Rab11fip3	0	0	-1.04832	0	0	0	0	0	0	0	0	0	0	0	-1.19141	0	0	0	0	0	0	0	0	0
Rab11fip4	0	0	-1.23232	0	0	0	0	0	0	0	0	0	0	0	0	0	0	0	0	0	0	0	0	0
Rab27a	0	0	0	0	0	0	0	0	-1.23587	-1.04134	0	0	0	0	0	0	0	0	0	0	0	0	0	0
Rab30	0	0	0	0	0	0	0	0	0	0	0	0	0	-1.34304	0	0	0	0	0	0	0	0	0	0
Rab6b	0	0	0	0	0	0	0	0	-1.36398	0	0	0	0	0	0	0	0	0	0	0	0	0	0	0
Ralyl	0	0	0	0	0	0	-2.12565	-1.44663	0	0	0	0	-3.03316	-1.87092	0	0	0	0	0	0	0	0	0	0
Ranbp3l	0	0	-1.74773	0	0	0	-1.48113	0	0	-1.31747	-2.37507	0	0	-1.85141	0	0	0	0	0	0	0	0	-6.49446	0
Rap1gap	0	0	0	0	0	0	-1.607	0	-1.16129	0	0	0	0	0	0	0	-1.67537	0	0	0	0	0	0	0
Rap1gap2	0	0	0	0	0	0	0	0	-1.43035	0	-1.17764	0	-1.98296	-1.20437	0	0	-1.1749	0	0	0	0	0	0	0
Rapgef4	0	0	0	0	0	0	0	0	0	0	0	0	0	0	0	0	0	-2.87086	0	0	0	0	0	0
Rapgef4os1	0	0	0	0	0	0	0	0	0	0	0	0	0	0	0	-2.25989	0	0	0	0	0	0	0	0
Raph1	0	0	0	0	0	0	0	0	0	0	0	0	0	0	0	0	0	0	0	0	0	-1.29764	0	0
Rarb	0	0	-1.36457	0	0	0	0	0	0	0	0	0	0	0	0	0	0	0	0	0	0	-1.25748	0	0
Rasal1	0	0	0	0	0	-1.49125	0	0	0	0	0	0	0	-1.48242	0	0	0	0	0	0	0	0	0	0
Rasd2	0	0	0	0	0	0	0	0	0	0	-2.8576	0	0	0	0	0	0	0	0	0	0	0	0	0
Rasgef1b	0	0	0	0	0	0	-1.63923	0	0	0	0	0	0	0	0	0	0	0	0	0	0	0	0	0
Rasgrf2	0	0	0	0	0	0	0	0	0	0	0	0	0	0	0	0	0	0	0	-2.11031	0	0	0	0
Rasgrp2	0	0	0	0	0	0	0	0	0	0	0	0	0	0	0	0	0	0	0	0	-2.67259	-2.45304	0	0
Rassf6	0	0	0	0	0	0	0	0	0	0	0	0	-1.76523	0	0	0	0	0	0	0	0	0	0	0
Rassf8	0	0	0	0	0	0	0	0	0	0	0	0	-1.48808	0	0	0	0	0	0	0	0	0	0	0
Rbfox1	0	0	0	0	0	0	0	0	0	0	0	0	0	0	0	0	0	0	0	0	0	-2.60211	0	0
Rbms3	0	0	0	0	0	0	0	0	0	0	0	0	0	0	0	0	0	0	0	0	0	0	0	0
Rcan2	0	0	0	0	0	0	0	0	0	0	0	0	0	0	0	0	0	0	0	0	0	-2.5261	0	0
Rcsd1	0	0	0	0	0	0	0	0	0	0	0	0	0	0	0	0	0	0	0	0	0	-1.04989	0	0
Rdh16	0	0	-2.30644	-1.94139	0	0	0	0	0	0	0	0	0	0	0	0	0	0	-4.00744	0	-6.57041	0	0	0
Rdh16f2	-4.55692	0	-4.43019	-1.75099	-6.41773	0	-5.31894	-1.2735	-6.62984	0	-4.53702	-1.39847	-4.40281	0	0	0	-3.38977	0	-5.56278	-2.1601	-6.58922	-1.47301	0	0
Rdm1	0	0	0	0	0	0	-1.384	0	0	0	0	0	0	0	0	0	0	0	0	0	0	0	0	0
Rerg	0	0	0	0	0	0	0	0	0	0	0	0	0	0	0	0	0	0	0	0	0	-1.44485	0	0
Retsat	0	0	-2.13532	-1.19089	0	0	-2.55499	0	-1.97365	0	0	0	0	0	0	0	0	0	0	0	0	0	0	0
Rflna	0	0	0	0	0	-3.67474	0	0	0	0	0	0	0	0	0	0	0	0	-2.88648	0	0	0	0	0
Rfng	0	0	-1.00829	-1.34165	0	0	0	0	0	0	0	0	0	0	0	0	0	0	0	0	0	0	0	0
Rgcc	0	0	0	0	0	0	-2.06099	0	0	0	0	0	0	0	0	0	0	0	0	-1.88038	0	0	0	0
Rgl1	0	0	-1.41154	0	0	0	0	0	0	0	0	0	0	0	0	0	0	0	-1.59369	0	0	0	0	0
Rgs11	0	0	0	0	0	0	0	0	0	-1.48431	0	-1.22781	-1.51363	-1.90062	0	0	0	0	0	0	0	0	0	0
Rgs12	0	0	-1.04302	0	0	0	0	0	0	0	0	0	0	0	0	0	0	0	0	0	0	0	0	0
Rgs2	0	0	0	0	0	0	0	0	0	0	0	0	0	0	0	0	0	-1.41479	0	0	0	0	0	0
Rgs20	0	0	0	-2.20593	0	0	0	0	0	0	0	0	0	0	0	0	0	0	0	0	0	0	0	0
Rgs6	0	0	0	0	0	0	-1.00119	0	0	0	0	0	0	0	0	0	0	0	0	0	0	0	0	0
Rhbg	0	0	0	0	0	0	0	0	0	0	0	0	0	0	0	0	-1.16869	0	0	0	0	0	0	0
Rhcg	0	0	0	0	0	0	0	0	0	0	0	-1.31496	0	-1.56131	0	0	-1.25437	0	0	0	0	0	0	0
Rhd	0	0	0	0	0	0	0	0	0	0	0	0	-4.90238	0	0	0	0	0	0	0	0	0	0	0
Rhobtb2	0	0	0	0	0	0	-1.26163	0	0	0	0	0	0	0	0	0	0	0	0	0	0	0	0	0
Rhpn2	0	0	0	0	0	0	0	0	-1.67584	0	0	0	0	0	0	0	0	0	0	0	0	0	0	0
Rida	0	0	0	0	0	0	-1.03467	0	-1.15231	0	-1.30193	0	-1.45205	0	-1.794	0	0	0	-1.99907	0	-2.72826	0	0	0
Rilpl2	0	0	-1.09447	0	0	0	0	0	0	0	0	0	0	0	0	0	0	0	0	0	0	0	0	0
Ring1	0	0	0	0	0	0	0	-1.05077	0	0	0	0	0	-1.21761	0	0	0	0	0	0	0	0	0	0
Ripor3	0	0	0	0	0	0	0	0	0	0	0	0	0	0	0	0	0	0	0	0	0	-2.83095	0	0
Rmdn1	0	0	0	0	0	0	0	0	0	0	0	0	0	0	0	0	0	0	0	0	0	-1.28306	0	0
Rmnd1	0	0	0	0	0	0	0	0	0	0	0	0	0	0	0	0	-1.16215	0	0	0	0	0	0	0
Rmnd5a	0	0	0	0	0	0	0	0	0	-1.20328	0	-1.10379	0	0	0	0	0	0	0	0	0	0	0	0
Rnase4	0	0	0	-1.93834	0	0	0	0	0	0	0	0	0	0	0	0	0	0	0	0	0	0	0	0
Rnaset2b	0	0	0	0	0	0	0	0	0	0	-2.12296	0	0	0	0	0	0	0	0	0	0	0	0	0
Rnf144a	0	0	0	0	0	0	0	0	0	0	0	0	0	0	0	0	0	0	0	-1.14742	0	0	0	0
Rnf212b	0	0	-4.52509	0	0	0	0	0	0	0	0	0	0	0	0	0	0	0	0	0	0	0	0	0
Rnf24	0	0	-2.5756	0	0	0	0	0	0	0	0	0	0	0	0	0	0	0	0	0	0	0	0	0
Rnpc3	0	0	0	0	0	0	0	0	0	0	0	0	0	-1.1669	0	0	0	0	0	0	0	0	0	0
Robo2	0	0	0	0	0	0	0	0	0	0	0	0	0	0	0	0	0	0	0	0	0	-1.41622	0	0
Robo3	0	0	0	0	0	0	-5.4589	-3.50382	0	0	0	0	0	0	0	0	0	0	0	0	0	0	0	0
Ror2	0	0	-2.28949	0	0	0	-1.33767	0	-2.16942	0	0	0	0	0	0	0	0	0	0	0	0	0	0	0
Rora	0	0	0	0	0	0	0	0	0	0	0	0	0	0	0	0	0	0	-1.93635	-1.09006	0	0	0	0
Rorc	0	0	0	-1.42065	0	0	0	-1.06078	0	0	0	0	0	0	0	0	0	0	0	0	0	0	0	0
Rp1	0	0	0	0	0	0	0	0	0	0	0	0	0	0	-4.92825	0	-1.78872	-1.05188	0	0	0	0	0	0
Rph3a	0	0	0	0	0	0	-4.12735	-1.39872	0	0	0	0	0	0	0	0	0	0	0	0	0	0	0	0
Rps6ka5	0	0	0	0	0	0	-1.22481	0	0	0	0	0	0	0	0	0	0	0	0	0	0	0	0	0
Rragd	0	0	0	0	0	0	-1.21606	0	0	0	0	0	0	0	0	0	0	0	0	0	0	0	0	0
Rsad1	0	0	0	0	0	0	-1.03309	0	0	0	0	0	0	0	0	0	0	0	0	0	0	0	0	0
Rsf1os1	0	0	0	0	0	0	0	0	0	0	0	0	0	-2.09746	0	0	0	0	0	0	0	0	0	0
Rsph3b	0	0	0	-1.05139	0	0	0	0	0	0	0	0	0	0	0	0	0	0	0	0	0	0	0	0
Rtl4	0	0	0	0	0	0	-3.43018	-2.30546	-2.55333	0	0	0	0	0	-3.481	0	-1.8091	0	0	0	0	0	0	0
Rtn4rl1	0	0	-1.02456	0	0	0	0	0	0	0	0	0	0	0	0	0	0	0	0	0	0	0	0	0
Rufy2	0	0	0	0	0	-1.31088	0	0	0	0	0	0	0	-1.50273	0	0	0	0	0	0	0	0	0	0
Rufy4	0	0	0	0	0	0	-1.27943	0	0	0	0	0	0	0	0	0	0	0	0	0	0	0	0	0
Ryr2	0	0	-2.05612	0	0	0	-2.93449	-3.40719	0	0	-2.74771	0	0	0	0	0	0	0	0	0	0	0	0	0
S100g	0	0	0	0	0	0	0	0	-1.28449	0	-1.2451	0	0	0	0	0	0	0	-1.30595	0	0	0	0	0
Sag	0	0	0	0	0	0	0	0	0	0	0	0	0	-2.40616	0	0	0	0	0	0	0	0	0	0
Sall3	0	0	0	0	0	0	0	0	-1.11601	0	-1.50651	0	0	0	0	0	0	0	0	0	0	0	0	0
Samd12	0	0	0	0	0	0	0	0	0	0	0	0	0	0	0	0	0	0	0	-1.52567	0	0	0	0
Sap30	0	0	-2.0892	0	0	0	0	0	0	0	0	0	0	0	0	0	0	0	0	0	0	0	0	0
Sardh	0	0	-2.07208	-1.18358	0	0	-1.53255	0	0	0	0	0	0	0	0	0	0	0	0	0	0	0	0	0
Sardhos	0	0	-1.34342	-1.25414	0	0	0	0	0	0	0	0	0	0	0	0	0	0	0	0	0	0	0	0
Sbf2	0	0	0	0	0	0	0	0	0	0	0	0	0	0	0	0	0	0	0	0	0	-1.09697	0	0
Sbk1	0	0	-1.58459	0	0	0	0	0	0	0	0	0	0	0	0	0	0	0	0	0	0	0	0	0
Sbspon	0	0	0	0	0	0	0	0	0	0	0	0	0	-1.08751	0	0	0	0	0	0	0	0	0	0
Sc5d	0	0	-1.14207	0	0	0	0	0	0	0	0	0	0	0	0	0	0	0	0	0	0	0	0	0
Scara5	0	0	0	0	0	0	-1.5639	0	-2.0156	0	-2.19367	0	0	0	0	0	0	0	0	0	0	0	0	0
Scd1	0	0	-2.75021	0	-3.30588	0	-2.77137	0	-2.53482	0	-2.53556	0	0	0	0	0	0	0	0	0	0	0	0	0
Scd4	0	0	0	0	0	0	0	0	0	0	0	0	-3.34284	0	0	0	0	0	0	0	0	0	0	0
Scel	0	0	0	0	0	0	0	0	0	0	0	0	0	-2.4963	0	0	0	0	0	0	0	0	0	0
Scg5	0	0	0	0	0	0	-1.05556	0	0	0	0	0	0	0	0	0	0	0	0	0	0	0	0	0
Scml4	0	0	0	0	0	0	0	0	-1.63495	0	0	0	0	0	0	0	0	0	0	0	0	0	0	0
Scn4b	0	0	0	0	0	0	-2.71335	0	-1.21749	0	-1.62464	-1.14356	-3.49037	0	0	0	0	0	0	0	-4.25653	0	0	0
Scn8a	0	0	0	0	-3.63955	0	0	0	0	0	0	0	0	0	0	0	0	0	0	0	0	0	0	0
Scnn1a	0	0	0	0	0	0	0	0	0	0	0	0	0	-1.04377	0	0	-1.184	0	0	0	0	0	0	0
Scoc	0	0	-1.08658	0	0	0	0	0	0	0	0	0	0	0	0	0	0	0	0	0	0	0	0	0
Sctr	0	0	0	0	0	0	0	0	0	0	0	0	0	0	0	0	-2.19198	0	0	0	0	0	0	0
Sdhc	0	0	0	0	0	0	0	0	-1.07241	0	0	0	0	0	0	0	0	0	0	0	0	0	0	0
Sdk1	0	0	0	0	0	0	0	0	0	0	0	0	0	0	0	-1.02616	0	0	0	0	0	0	0	0
Sec62	0	0	0	0	0	0	-1.01168	0	0	0	0	0	0	0	0	0	0	0	0	0	0	0	0	0
Sel1l3	0	0	-1.12273	0	0	0	0	0	0	0	0	0	-2.14925	0	0	0	0	0	0	0	0	0	0	0
Selenos	0	0	0	0	-2.18024	0	0	0	0	0	0	0	0	0	0	0	0	0	0	0	0	0	0	0
Sema3b	0	0	0	0	0	0	-1.21676	0	0	0	0	0	0	0	-1.98713	0	0	0	0	0	0	0	0	0
Sema4b	0	0	0	0	0	-1.04148	0	0	0	0	0	0	0	0	0	0	0	0	0	0	0	0	0	0
Sema4g	0	0	-2.02057	-1.85147	0	0	0	0	0	0	0	-2.14918	0	0	0	0	0	0	0	0	0	0	0	0
Sema5b	0	0	0	0	0	0	0	0	0	0	0	0	0	0	0	0	0	0	0	-3.13993	0	0	0	0
Sema6a	0	0	0	0	0	0	0	0	0	0	0	0	0	0	0	0	0	0	-1.43122	-1.01782	0	0	0	0
Sephs2	0	0	0	0	0	0	0	0	0	0	0	0	0	0	0	0	0	0	-2.75566	0	0	0	0	0
2006-09-01	0	0	0	0	0	0	0	0	-1.23762	0	0	0	0	0	0	0	0	0	0	0	0	0	0	0
Serpina1f	0	0	0	0	0	0	-1.38968	0	0	0	0	0	0	0	0	0	0	0	0	0	0	0	0	0
Serpinb8	0	0	0	-1.47476	0	0	0	0	0	0	0	0	0	0	0	0	0	0	0	0	0	0	0	0
Sesn1	0	0	0	0	0	0	0	0	0	0	0	0	0	0	0	0	0	0	0	-1.3683	0	0	0	0
Sfrp1	0	0	0	0	0	0	-1.9595	0	-2.33467	0	-1.664	0	0	0	0	0	0	0	0	0	0	0	0	0
Sfxn2	0	0	-1.50712	-1.0746	0	0	0	0	0	0	0	0	0	0	0	0	-1.94206	0	0	0	0	0	0	0
Sfxn4	0	0	0	0	0	0	-1.10065	0	0	0	0	0	0	0	0	0	0	0	0	0	0	0	0	0
Sfxn5	0	0	-1.24065	0	0	0	0	0	-1.19367	0	0	-1.00891	0	-1.25687	0	0	0	0	0	0	0	0	0	0
Sgcd	0	0	0	0	0	0	-1.41034	0	0	0	-1.38392	0	-2.2739	0	0	0	0	0	0	0	0	0	0	0
Sgk1	0	0	0	0	0	-1.4719	0	0	0	0	0	0	0	-1.19621	0	0	0	0	0	-1.08762	0	0	0	0
Sgk2	0	0	-1.75997	-1.03939	0	0	-1.34928	0	0	0	0	0	0	0	0	0	0	0	0	0	0	0	0	0
Sgms2	0	0	0	0	0	0	0	0	-1.45696	-1.25836	0	0	0	0	0	0	0	0	0	0	0	0	0	0
Sgpp1	0	0	-1.00777	0	0	0	0	0	0	0	0	0	0	0	0	0	0	0	0	0	0	0	0	0
Sgsm1	0	0	0	0	0	0	0	0	-1.54607	-1.56228	-1.47134	-1.58629	0	0	0	0	0	0	0	0	0	0	0	0
Sh2d4a	0	0	0	0	0	0	0	0	0	0	0	0	0	0	0	0	-1.39522	0	0	0	0	0	0	0
Sh3bp5	0	0	-1.38525	0	0	0	0	0	0	0	0	0	0	0	0	0	0	0	0	0	0	0	0	0
Sh3d21	0	0	0	0	0	0	0	0	0	0	0	0	0	0	0	0	0	0	-3.38808	0	-3.59285	0	0	0
Sh3gl2	0	0	0	0	0	0	0	0	0	0	0	0	0	-1.0287	0	0	0	0	0	0	0	0	0	0
Sh3pxd2b	0	0	0	0	0	0	0	0	0	0	0	0	0	0	0	0	-1.85828	0	0	0	0	0	0	0
Shank2	0	0	0	0	0	0	0	0	0	0	-1.25048	0	0	0	0	0	0	0	0	0	0	0	0	0
Shd	0	0	0	0	0	0	-1.10284	0	0	0	0	0	0	0	0	0	0	0	0	0	0	0	0	0
Shmt1	0	0	-2.04047	0	0	0	0	0	0	0	0	0	0	0	0	0	0	0	0	0	0	0	0	0
Shmt2	0	0	-1.43899	-1.15387	0	0	0	0	0	0	0	0	0	0	0	0	0	0	0	0	-3.7076	0	0	0
Shpk	0	0	-1.06521	0	0	0	0	0	0	0	0	0	0	0	0	0	0	0	0	0	0	0	0	0
Sim1	0	0	0	0	0	0	0	0	0	0	0	0	0	-1.29301	0	0	0	0	0	0	0	0	0	0
Sirt3	0	0	-1.59939	0	0	0	0	0	0	0	-1.05612	0	0	0	0	0	0	0	0	0	0	0	0	0
Slain2	0	-1.32112	0	0	0	0	0	0	0	0	0	0	0	0	0	0	0	0	0	0	0	0	0	0
Slc12a1	0	0	0	0	0	0	-1.12048	0	0	0	0	0	0	0	0	0	0	0	0	0	0	0	0	0
Slc12a3	0	0	0	0	0	0	0	0	-1.32379	0	0	0	0	0	0	0	0	0	0	0	0	0	0	0
Slc12a8	0	0	0	0	0	0	0	0	0	0	0	0	-3.72676	0	0	0	0	0	0	0	0	0	0	0
Slc13a2	0	0	-2.39648	-1.36586	0	0	0	0	0	0	0	0	0	0	0	0	0	0	0	0	-5.0398	0	0	0
Slc13a3	-3.41783	0	-2.96863	-1.09658	-4.9026	0	-3.4916	0	-3.45964	0	-4.01177	0	-3.43912	0	0	0	0	0	-4.36448	0	-4.66359	0	0	0
Slc15a4	0	0	0	-1.49513	0	0	0	0	0	0	0	0	0	0	0	0	0	0	0	0	0	0	0	0
Slc16a10	0	0	0	0	0	0	0	0	-1.08453	0	0	0	0	0	0	0	0	0	0	0	0	0	0	0
Slc16a12	0	0	0	0	0	0	0	0	0	0	-2.18909	0	-2.17825	0	0	-1.35161	0	0	0	0	0	0	0	0
Slc16a14	0	0	0	-1.79024	0	0	0	0	0	0	0	0	0	0	0	0	0	0	0	0	0	0	0	0
Slc16a4	0	0	-1.09273	0	0	0	0	0	0	0	0	0	0	0	0	0	0	0	0	0	0	0	0	0
Slc16a5	0	0	0	0	0	0	-1.14308	0	-1.37738	0	0	0	0	0	0	0	0	0	0	0	0	0	0	0
Slc16a7	0	0	0	0	0	0	-2.04028	0	-2.10956	-1.32484	-1.94739	-1.25901	0	0	-1.22692	0	-1.61701	-1.31995	0	0	0	0	0	0
Slc16a9	0	0	-2.0622	-1.41663	0	0	-1.77726	0	0	0	0	0	0	0	-2.89712	0	0	0	-2.79045	0	0	0	0	0
Slc17a1	0	0	-1.20531	0	0	0	-1.1251	0	0	0	0	0	0	0	0	0	0	0	-2.27277	0	0	0	0	0
Slc17a3	0	0	-1.46228	0	0	0	-2.131	0	-2.33419	0	0	0	0	0	0	0	0	0	0	0	0	0	0	0
Slc18a1	0	0	0	-1.54614	0	0	0	0	0	0	0	0	0	0	0	0	0	0	0	0	0	0	0	0
Slc18b1	0	0	-1.2429	0	0	0	0	0	0	0	0	0	0	0	0	0	0	0	0	0	0	0	0	0
Slc19a1	0	0	0	0	0	0	0	0	0	0	0	0	-2.37446	0	0	0	0	0	0	0	0	0	0	0
Slc1a1	0	0	0	0	0	0	-1.07786	0	0	0	0	0	0	0	0	0	0	0	0	0	0	0	0	0
Slc22a1	0	0	-1.23091	0	-3.84697	0	-1.75212	0	-2.52968	0	-3.85611	0	0	0	0	0	0	0	-2.70842	0	-3.91657	0	0	0
Slc22a12	-2.65346	0	-1.18379	0	0	0	-2.57904	0	-2.34782	0	-2.8506	0	-2.7112	0	0	0	0	0	-3.74986	0	-3.76346	0	0	0
Slc22a18	0	0	-2.00337	0	0	0	0	0	0	0	0	0	0	0	0	0	0	0	-2.94958	0	-3.30502	0	0	0
Slc22a19	0	0	-3.78016	0	-6.42775	0	0	0	0	0	0	0	0	0	0	0	0	0	0	0	0	0	0	0
Slc22a2	0	0	-1.28035	0	0	0	-2.16133	0	-2.12516	0	0	0	0	0	0	0	0	0	-3.21577	0	0	0	0	0
Slc22a22	0	0	-4.21807	-2.8378	0	0	0	0	0	0	0	0	-5.81181	0	0	0	0	0	0	0	0	0	-3.3223	0
Slc22a23	0	0	-2.11118	-1.54116	0	0	0	0	-1.87905	-1.39614	-1.39901	0	0	0	0	0	0	0	0	0	0	0	0	0
Slc22a27	0	0	0	-1.83054	0	0	0	0	0	0	0	0	0	0	0	0	0	0	0	0	0	0	0	0
Slc22a28	0	0	-3.39613	-1.49029	0	0	0	0	0	0	-4.96212	0	0	0	0	0	0	0	-4.68223	0	0	0	0	0
Slc22a29	0	0	-5.69989	-3.52414	0	0	0	0	0	0	0	0	0	0	0	0	0	0	0	0	0	0	0	0
Slc22a30	0	0	-3.17709	-1.58684	0	0	0	0	0	0	0	0	-3.55202	0	0	0	0	0	-4.99834	0	0	0	0	0
Slc22a4	0	0	-1.7395	0	0	0	-1.78599	0	-2.31925	0	0	0	0	0	0	0	0	0	0	0	0	0	-3.26297	0
Slc22a6	0	0	-1.77551	0	0	0	-2.32021	0	-2.96825	0	-2.65896	0	0	0	0	0	0	0	-3.50453	0	-3.48469	0	0	0
Slc22a7	0	0	-4.34531	0	-3.76681	0	0	0	0	0	0	0	0	0	0	0	0	0	-5.22861	0	0	0	0	0
Slc22a8	-4.06888	0	-4.00737	-2.26276	-5.12974	0	-4.85613	-1.8421	-5.14534	-1.89392	-5.26373	0	-4.43294	0	-2.79795	0	-3.93179	0	-5.22463	-2.1227	-5.66252	-2.78822	0	0
Slc23a1	0	0	-1.15585	0	0	0	-1.48471	0	0	0	0	0	0	0	0	0	0	0	0	0	0	0	0	0
Slc24a3	0	0	0	0	0	0	0	0	0	0	0	0	0	0	0	0	0	0	0	0	0	-3.20073	0	0
Slc25a10	0	0	-1.3789	-1.04851	0	0	0	0	-1.64096	0	0	0	0	0	0	0	0	0	-3.32881	0	0	0	0	0
Slc25a12	0	0	0	0	0	0	0	0	0	0	-1.13139	0	0	0	0	0	-1.1386	0	0	0	0	0	0	0
Slc25a13	0	0	-1.13299	0	0	0	0	0	0	0	0	0	0	0	0	0	0	0	0	0	0	0	0	0
Slc25a16	0	0	-1.03919	0	0	0	0	0	0	0	0	0	0	0	0	0	0	0	0	0	0	0	0	0
Slc25a23	0	0	0	0	0	0	0	0	0	0	0	0	0	0	0	0	-1.40165	0	0	0	0	0	0	0
Slc25a25	0	0	-1.01663	0	0	0	0	0	0	0	0	0	0	0	0	0	0	0	0	0	0	0	0	0
Slc25a27	0	0	0	0	0	0	0	0	0	0	0	0	0	-2.04263	0	0	0	0	0	0	0	0	0	0
Slc25a34	0	0	-1.29287	-1.07664	0	0	0	0	0	0	0	0	0	0	0	0	0	0	0	0	0	0	0	0
Slc25a35	0	0	0	0	0	0	-1.33793	0	0	0	0	0	0	0	0	0	0	0	0	0	0	0	-2.60196	0
Slc25a42	0	0	-2.20796	-1.89793	0	0	0	0	0	0	0	0	0	0	0	0	0	0	0	0	0	0	0	0
Slc25a51	0	0	-1.12456	0	0	0	0	0	0	0	0	0	0	0	0	0	0	0	0	0	0	0	0	0
Slc26a1	0	0	-2.37073	-1.19913	0	0	0	0	0	0	0	0	0	0	0	0	0	0	0	0	0	0	0	0
Slc26a10	0	0	0	0	0	0	-1.95805	-2.26633	0	0	0	0	0	0	0	0	0	0	0	0	0	0	0	0
Slc26a2	0	0	-1.15606	0	0	0	0	0	0	0	0	0	0	0	0	0	0	0	0	0	0	0	0	0
Slc26a4	0	0	0	0	0	0	0	0	0	0	0	0	0	0	0	0	-1.08195	0	0	0	0	0	0	0
Slc26a7	0	0	0	0	0	0	0	0	0	0	0	0	0	0	0	-2.61664	0	0	0	0	0	0	0	0
Slc27a1	0	0	0	-1.03812	0	0	0	0	0	0	0	0	0	0	0	0	-1.86334	0	0	0	0	0	0	0
Slc27a2	0	0	0	0	0	0	0	0	-1.08055	0	0	0	0	0	0	0	0	0	0	0	0	0	0	0
Slc28a1	0	0	-2.46615	-1.14929	0	0	0	0	0	0	0	0	0	0	0	0	0	0	0	0	0	0	0	0
Slc29a3	0	0	-1.00275	0	0	0	0	0	0	0	0	0	0	0	0	0	0	0	0	0	0	0	0	0
Slc2a12	0	0	0	0	0	0	0	0	-1.91299	0	0	0	0	0	0	0	0	0	0	0	0	0	0	0
Slc2a13	0	0	0	0	0	0	-1.55368	0	0	0	0	0	0	0	0	0	0	0	0	0	0	0	0	0
Slc2a2	0	0	-1.86218	0	0	0	0	0	-2.51796	0	0	0	0	0	0	0	0	0	-3.40093	0	-3.37236	0	0	0
Slc2a4	0	0	0	0	0	0	-1.9693	0	-1.76097	0	-1.76536	0	0	0	0	0	0	0	0	0	0	0	0	0
Slc2a5	0	0	-2.09951	0	0	0	0	0	0	0	0	0	0	0	0	0	0	0	0	0	0	0	0	0
Slc2a8	0	0	0	0	0	0	0	0	0	0	0	0	0	0	0	0	0	0	0	0	0	-3.1093	0	0
Slc2a9	0	0	0	0	0	0	0	0	0	0	0	-1.58218	0	0	0	0	0	0	0	0	0	0	0	0
Slc30a2	0	0	0	0	0	0	0	0	-3.37742	0	0	0	0	0	0	0	0	0	0	0	0	0	0	0
Slc34a1	-4.20736	0	-3.06135	-1.9921	-3.88559	-1.05206	-3.28279	-1.53639	-3.92053	-1.58899	-3.45596	-1.30019	-3.35048	0	-3.36717	-1.34356	-2.25424	0	-4.37636	-1.72366	-4.35913	-1.38401	0	0
Slc34a3	0	0	-4.53454	-2.64906	0	0	0	0	0	0	0	0	-5.78181	0	0	0	0	0	0	0	0	0	0	0
Slc35f1	0	0	-2.74643	-1.74257	0	0	0	0	0	0	0	0	0	0	-1.53119	0	0	0	0	0	0	0	0	0
Slc35f2	0	0	0	0	0	0	-1.1556	0	0	0	0	0	0	0	0	0	0	0	0	0	0	0	0	0
Slc35f3	0	0	-1.65277	-1.0516	0	0	0	0	0	0	0	0	0	0	0	0	0	0	0	0	0	0	0	0
Slc35g1	0	0	0	0	0	0	0	0	-1.22033	0	0	0	0	0	0	0	0	0	0	0	0	0	0	0
Slc35g2	0	0	0	0	0	0	0	0	0	0	0	0	0	0	0	0	0	0	0	0	0	0	-4.2875	0
Slc37a4	0	0	-1.4608	-1.278	0	0	0	0	0	0	0	0	0	0	0	0	0	0	0	0	0	0	0	0
Slc39a5	0	0	-3.89372	-2.16551	0	0	0	0	0	0	0	0	0	0	0	0	0	0	0	0	-4.66154	0	0	0
Slc3a1	0	0	-1.17384	0	0	0	0	0	0	0	0	0	0	0	0	0	0	0	0	0	0	0	0	0
Slc40a1	0	0	0	0	0	0	0	0	0	0	0	0	0	0	0	0	0	0	0	0	-3.39879	-2.93853	0	0
Slc43a2	0	0	0	0	0	0	0	0	-1.22391	0	-1.49576	0	0	0	-1.29686	0	-1.7796	0	0	0	0	0	0	0
Slc46a3	0	0	-1.67252	0	0	0	0	0	0	0	0	0	0	0	0	0	0	0	0	0	0	0	0	0
Slc47a1	0	0	-1.01981	0	0	0	-1.40642	-1.20736	0	0	0	0	0	0	0	0	0	0	0	0	0	0	0	0
Slc4a1	0	0	0	0	0	0	0	0	0	0	0	0	0	0	-1.80441	0	0	0	0	0	0	0	0	0
Slc4a3	0	0	0	0	0	0	0	0	0	0	0	-1.0646	0	0	0	0	0	0	0	0	0	0	0	0
Slc4a4	0	0	0	0	0	0	0	0	0	0	0	0	0	0	0	0	0	0	-2.06404	0	0	0	0	0
Slc4a5	0	0	0	0	0	0	0	0	0	0	0	0	0	-1.61971	0	0	0	0	0	0	0	0	0	0
Slc51b	0	0	0	0	0	0	0	0	0	0	0	0	0	0	0	0	0	0	-3.54974	0	0	0	0	0
Slc5a11	0	0	-1.90556	0	-4.84752	0	0	0	0	0	0	0	0	0	0	0	0	0	0	0	0	0	0	0
Slc5a12	0	0	-1.69422	-1.81168	0	0	-2.4902	-2.01525	-2.93341	-2.50069	-4.42769	0	-3.43425	0	0	0	0	0	0	0	-4.58354	0	0	0
Slc5a2	-4.6757	0	-2.25926	-1.20076	0	0	-2.74474	-1.23382	-2.78535	-2.42174	-3.60273	0	-2.46913	0	-3.43064	0	0	0	-2.80228	0	-2.92293	0	0	0
Slc5a4a	0	0	-2.24188	-1.97658	0	0	0	0	0	0	0	0	0	0	0	0	0	0	0	0	0	0	0	0
Slc5a6	0	0	-2.11579	0	0	0	0	0	0	0	0	0	0	0	0	0	0	0	0	0	0	0	0	0
Slc5a8	0	0	-1.04336	0	0	0	-1.89734	0	0	0	0	0	0	0	0	0	0	0	0	0	0	0	0	0
Slc5a9	0	0	0	0	0	0	0	0	0	0	0	0	0	0	0	0	0	0	-3.48748	0	0	0	0	0
Slc6a12	0	0	0	0	0	0	0	0	0	0	0	0	0	-1.4316	0	0	0	0	0	0	0	0	0	0
Slc6a13	0	0	0	0	0	0	0	0	0	0	0	0	0	0	0	0	0	0	-2.69817	0	0	0	0	0
Slc6a17	0	0	0	0	0	0	-1.18793	0	0	0	0	0	0	0	0	0	0	0	0	0	0	0	0	0
Slc6a19	0	0	-1.03433	-1.55114	0	0	0	0	0	0	0	0	0	0	-2.77049	0	0	0	0	0	-2.79042	0	0	0
Slc6a20b	0	0	-2.17689	-1.01011	0	0	0	0	0	0	0	0	0	0	0	0	0	0	-3.0864	0	-3.7245	0	0	0
Slc6a4	0	0	-2.19495	0	0	0	0	0	0	0	0	0	0	0	0	0	0	0	0	0	0	0	0	0
Slc7a12	0	0	-1.33484	0	0	0	0	0	-2.53084	0	0	0	0	0	0	0	0	0	-3.54319	0	0	0	0	0
Slc7a13	0	0	-1.89388	-1.86784	0	0	0	0	0	0	0	0	0	0	0	0	0	0	0	0	0	0	0	0
Slc7a8	0	0	-2.19888	-1.19794	0	0	-1.52578	0	0	0	0	0	-2.14545	0	0	0	0	0	0	0	0	0	0	0
Slc7a9	0	0	-1.6032	-1.22576	0	0	0	0	0	0	0	0	0	0	0	0	0	0	-3.02603	0	0	0	0	0
Slc8a1	0	0	0	-1.1791	0	-2.36318	0	-1.14317	-3.97573	-1.94918	-1.92349	0	0	0	0	0	0	0	0	0	0	0	0	0
Slc9a2	0	0	-1.33285	0	0	0	-1.80295	0	0	-1.00798	-1.56706	-1.36948	0	0	0	0	0	0	0	0	0	0	0	0
Slc9a3	0	0	-1.69648	0	0	0	0	0	0	0	0	0	0	0	0	0	0	0	0	0	0	0	0	0
Slc9a4	0	0	0	0	0	0	0	0	0	0	0	0	-1.77442	0	0	0	0	0	0	0	0	0	0	0
Slc9a6	0	0	0	0	0	0	0	0	0	0	0	0	-1.49449	0	0	0	0	0	0	0	0	0	0	0
Slc9a7	0	0	0	0	0	0	0	0	0	0	0	0	-2.24248	0	0	0	0	0	0	0	0	0	0	0
Slc9a8	0	0	-1.63827	0	0	0	0	0	0	0	0	0	0	0	0	0	0	0	0	0	0	0	0	0
Slco1a4	0	0	0	0	0	0	0	0	0	0	0	0	0	0	0	0	0	0	-5.26991	0	0	0	0	0
Slco1a6	0	0	-1.69709	0	0	0	-2.03302	0	-2.33105	0	-2.6462	0	-2.59364	0	0	0	0	0	0	0	0	0	0	0
Slco4a1	0	0	0	0	0	-1.03159	0	0	0	0	0	0	0	0	0	0	0	0	0	0	0	0	0	0
Slfn5	0	0	0	0	0	0	0	0	0	0	0	0	0	0	0	0	0	0	0	0	0	-1.02597	0	0
Slit2	0	0	0	0	0	0	0	0	0	0	-1.44377	0	-2.58039	0	0	0	0	0	0	0	0	0	0	0
Slit3	0	0	0	0	0	0	0	0	0	0	0	0	0	0	0	0	0	0	-2.44502	0	0	0	0	0
Smad9	0	0	0	0	0	0	0	0	0	0	0	0	0	0	0	0	0	0	0	0	-5.79622	0	0	0
Smarca2	-1.85087	0	-1.68894	-1.20197	0	0	0	0	0	0	0	0	0	0	0	0	0	0	0	0	0	0	0	0
Smim20	0	0	0	0	0	0	0	0	-1.13788	0	0	0	0	0	0	0	0	0	0	0	0	0	0	0
Smim24	0	0	-1.43588	0	0	0	0	0	0	0	0	0	0	0	-5.69091	0	0	0	0	0	-3.44064	0	0	0
Smim5	0	0	0	0	0	0	0	0	0	0	0	0	0	-1.79041	0	0	0	0	0	0	0	0	0	0
Smkr-ps	0	0	0	0	-3.86684	0	0	0	0	0	0	0	0	0	0	0	0	0	0	0	0	0	0	0
Smpd1	0	0	0	0	0	0	-1.5038	0	0	0	0	0	0	0	0	0	0	0	0	0	0	0	0	0
Sms	0	0	-1.40187	-1.48515	0	0	0	0	0	0	0	0	0	0	0	0	0	0	0	0	0	0	0	0
Snap91	0	0	0	0	0	0	-3.08778	-1.80217	0	0	0	0	0	0	0	0	0	0	0	0	0	0	0	0
Sned1	0	0	0	0	0	0	-1.89525	-1.05079	-3.84874	0	0	0	0	0	0	0	0	0	0	0	0	-2.70826	0	0
Snhg11	0	0	-1.04077	0	0	0	0	0	0	0	0	0	0	0	0	0	0	0	0	0	0	0	0	0
Snhg20	0	0	0	0	0	0	0	0	0	0	0	0	0	-1.55431	0	0	0	0	0	0	0	0	0	0
Snta1	0	0	0	0	0	0	0	0	0	0	0	0	0	0	0	0	-2.13119	0	0	0	0	0	0	0
Sntb1	0	0	0	0	0	0	0	0	0	0	0	0	0	0	0	0	0	0	-2.98926	0	0	0	0	0
Snx29	0	0	-1.33823	0	0	0	0	0	0	0	0	0	-1.38194	0	0	0	0	0	0	0	0	0	0	0
Snx32	0	0	0	0	0	0	0	0	0	0	0	0	0	0	0	0	0	0	0	0	0	0	-4.8039	0
Snx8	0	0	-1.27433	0	0	0	0	0	0	0	0	0	0	0	0	0	0	0	0	0	0	0	0	0
Sorbs2os	0	0	0	0	0	0	0	0	0	0	0	0	0	-1.96705	0	0	0	0	0	0	0	0	0	0
Sord	-2.91705	0	-2.54746	-1.38994	0	0	-2.63432	0	-2.49338	0	-2.42741	0	-2.21581	0	-2.91534	0	-2.73092	0	-3.53201	0	-3.55438	0	0	0
Sox13	0	0	0	0	0	0	0	0	0	0	0	0	0	0	0	0	0	0	0	0	0	-1.60918	0	0
Sox5os4	0	0	0	0	0	0	0	0	0	0	0	0	0	-1.39222	0	0	0	0	0	0	0	0	0	0
Sox6	0	0	0	0	0	0	0	0	0	0	0	0	-1.0372	-1.16413	0	0	0	0	0	0	0	0	0	0
Spa17	0	0	0	0	0	0	-1.59164	0	0	0	0	0	0	0	0	0	0	0	0	0	0	0	0	0
Spag5	0	0	0	0	0	0	0	0	0	0	0	0	0	-1.29405	0	0	0	0	0	0	0	0	0	0
Spata1	0	0	0	0	0	0	0	0	0	0	0	0	0	-1.86983	0	0	0	0	0	0	0	0	0	0
Spata7	0	0	0	0	0	0	0	0	0	0	0	0	0	0	0	0	0	0	0	0	0	-2.37181	0	0
Spink1	0	0	0	0	0	0	-1.53709	0	-1.61719	0	-1.42059	0	0	0	0	0	0	0	-2.16848	0	-2.53542	0	0	0
Spink10	0	0	0	0	0	0	0	0	0	0	0	0	0	0	0	0	0	0	0	0	0	0	-4.75513	0
Spire1	0	0	0	0	0	0	0	0	0	0	-1.32846	0	0	0	0	0	0	0	0	0	0	0	0	0
Spock3	0	0	0	-1.57041	0	0	0	0	0	0	0	0	-3.07314	0	0	0	0	0	0	0	0	0	0	0
Spp2	0	0	-3.62958	-2.68518	0	0	0	0	-3.39511	0	-3.87446	0	0	0	0	0	0	0	-3.80935	-3.28217	-5.61548	0	0	0
Sptbn2	0	0	0	0	0	0	0	0	0	0	0	-1.01892	0	0	0	0	0	0	0	0	0	0	0	0
Sptssa	0	0	0	0	0	0	0	0	0	0	0	0	0	0	0	0	0	0	-1.82055	0	0	0	0	0
Sptssb	0	0	0	0	-3.87151	-2.01315	0	0	0	0	0	0	0	0	0	0	0	0	0	0	0	0	0	0
Srcin1	0	0	-1.04112	0	0	0	0	0	0	0	0	0	0	0	0	0	0	0	0	0	0	0	0	0
Srd5a2	0	0	-1.6861	0	0	0	0	0	0	0	0	0	0	0	0	0	0	0	0	0	0	0	0	0
Srebf2	0	0	0	0	0	0	-1.12379	0	0	0	0	0	0	0	0	0	0	0	0	0	0	0	0	0
Srl	0	0	0	0	0	0	-1.0997	0	-2.76153	-1.33018	0	0	0	0	0	0	0	0	0	0	0	0	0	0
Srr	0	0	-1.17339	0	0	0	0	0	0	0	0	0	0	0	0	0	0	0	0	0	0	0	0	0
St3gal6	0	0	0	0	0	0	0	0	0	0	0	0	0	-1.12157	0	0	0	0	0	0	0	0	0	0
St6gal1	0	-1.09332	0	0	0	0	0	0	0	0	0	0	0	0	0	0	0	0	0	0	0	0	0	0
St6galnac3	0	0	-2.16178	0	0	0	0	0	0	0	0	0	0	0	0	0	0	0	-1.56691	0	0	0	0	0
St8sia1	0	0	-1.30342	0	0	0	0	0	0	0	0	0	0	0	0	0	0	0	0	0	0	0	0	0
[truncated: 238 more rows]

[truncated: 38 more sheets: Figure S7A left, Figure S7A right, Figure S7B left, Figure S7B right, Figure S7C left, Figure S7C right, Figure S7D left, Figure S7D right, Figure S8B, Figure S11B, Figure S13A, Figure S13B, Figure S13C, Figure S13D, Figure S13E, Figure S13F, Figure S13G, Figure S13H, Figure S14A, Figure S14B …]
